# Supplementary material for: Computational screening of piezoelectric constants in metal–organic frameworks: design principles and ferroelectric-like bond modulation
Source: J Mater Chem A Mater. 2026 Feb 24;14(23):14311–23. doi: 10.1039/d5ta09332e (PMC12951834; doi:10.1039/d5ta09332e)
Supplement: TA-014-D5TA09332E-s001 [file TA-014-D5TA09332E-s001.xlsx]

## Sheet: Sheet1
	info_MOFCode	e11	e12	e13	e14	e15	e16	e21	e22	e23	e24	e25	e26	e31	e32	e33	e34	e35	e36	info_ClampedNorm	info_PointGroup	info_Atoms	info_optnetmagmom	info_piezonetmagmom	info_magmom_matchopt&piezo	info_magmom_matchwithqmof	info_qmofmagmom	Status_zeroesconvergenceintensor	Status_dependentconvintensor
931	ODOXEK_FSR	-16.1672	16.1672	0	0	-8.29515	0	0	0	0	-8.97141	0	16.1672	-0.08759	-0.08759	0.07788	0	0	0	24.3222	3m	Cd6-H18-C54-O36	0	0	equal_bothsteps	equal	0	Failed	Success at all eik
1376	GLALCU10_FSR	0.00047	8e-05	-0.00029	0.07601	0.00011	-0.05431	-0.00561	-0.00334	0.01868	6e-05	0.05844	0.00025	0.00164	-0.00132	0.01697	-0.15661	-0.0001	-1.5108	1.5197	222	Cu4-H32-C20-N8-O12	2	0	notequal_bothsteps	notequal	0	Success at all eik	This sg doesnt have any
28	PEVYUM_FSR	-0.00072	0.08284	0.00805	-0.00793	-0.00446	-0.00492	0.06474	1.24988	0.05905	-0.0141	-0.05954	0.02348	0.00364	-0.14137	-0.00295	0.00854	0.00377	0.02115	1.26526	2	C24-Co2-F2-H20-N4-O6	2	0	notequal_bothsteps	notequal	0	Failed at e35	This sg doesnt have any
1454	FIPHOD_FSR	0.18385	0.39335	0.2945	0.15107	0.14152	-0.23503	0.12071	-0.04987	0.01364	-0.00585	-0.00471	0.04949	0.14232	0.36247	0.27981	0.12624	0.12053	-0.20603	0.822078	1	Fe1-Cu1-H30-C19-N11	0	0	equal_bothsteps	equal	0	This sg doesnt have any	This sg doesnt have any
0	EHOHOY_FSR	0.64809	-0.08331	-0.30542	0	-0.0607	0	0	0	0	-0.08086	0	0.12869	0.00171	-0.12622	0.09836	0	-0.02406	0	0.724227	m	Sb4-P4-H4-C2-O14	0	0	equal_bothsteps	equal	0	Success at all eik	This sg doesnt have any
167	BIFSUF_FSR	-0.35664	0.09068	0.36022	0.21113	-0.2216	-0.05304	-0.04559	-0.30379	0.47144	-0.1096	0.21586	0.10186	0.00121	0.01268	0.04814	0.05743	0.04813	0.02066	0.67734	1	Zn2-H8-C10-N2-O6	0	0	equal_bothsteps	equal	0	This sg doesnt have any	This sg doesnt have any
724	DOLDUE_FSR	0	0	0	0	-0.0036	0	0	0	0	0.096	0	0	0.10854	0.16926	-0.44435	0	0	0	0.487726	mm2	C16-Cd2-H16-N24	0	0	equal_bothsteps	equal	0	Success at all eik	This sg doesnt have any
479	KIYBEZ01_FSR	0.31137	-0.31137	0	0.01958	0	0	0	0	0	0	-0.01959	-0.31137	0	0	0	0	0	0	0.440779	32	K9-H12-C18-N9-O33	0	0	equal_bothsteps	equal	0	Success at all eik	Success at all eik
1289	WIJDID_FSR	0	0	0	0	-0.28314	0	0	0	0	-0.07026	0	0	-0.26478	-0.06196	0.32002	0	0	0	0.419953	mm2	Cu12-H24-C12-N24-Cl12	0	0	equal_bothsteps	equal	0	Success at all eik	This sg doesnt have any
349	IQOZUJ_FSR	0	0	0	0	0.03774	0	0	0	0	-0.10999	0	0	-0.08633	-0.40704	0.04471	0	0	0	0.418489	mm2	C24-Co4-H20-N16	8	8	equal_bothsteps	notequal	0	Success at all eik	This sg doesnt have any
165	QQQBKV10_FSR	0	0	0	0	-0.14479	0	0	0	0	-0.13825	0	0	-0.20016	-0.14451	0.31563	0	0	0	0.400711	mm2	Tl4-H4-C4-O8	0	0	equal_bothsteps	equal	0	Success at all eik	This sg doesnt have any
372	WOBQAH_FSR	0.04273	-0.14963	-0.05477	0	-0.02261	0	0	0	0	-0.01672	0	-0.05895	-0.26313	0.03327	-0.18137	0	-0.22949	0	0.39486	m	C16-Co4-H14-O12-P2	0	6	notequal_bothsteps	equal	0	Success at all eik	This sg doesnt have any
158	CUFCEN_FSR	-0.0133	-0.0476	0.13463	0.01544	-0.02443	-0.12591	-0.04452	-0.00055	-0.02183	0.0305	-0.03919	-0.01819	0.00244	0.08059	-0.27161	-0.03954	0.05704	0.17681	0.390703	1	Mn2-H18-C16-N2-O12	4	4	equal_bothsteps	equal	4	This sg doesnt have any	This sg doesnt have any
101	RURDEP_FSR	-0.14789	-0.00147	0.14091	0	0.15856	0	0	0	0	0.10685	0	-0.04116	0.12023	0.12817	-0.24675	0	0.11741	0	0.354168	m	B10-C8-H14-La4-O28	0	0	equal_bothsteps	equal	0	Success at all eik	This sg doesnt have any
122	RURJOF_FSR	-0.13656	0.00989	0.12189	0	0.1771	0	0	0	0	0.10823	0	-0.03309	0.1236	0.12708	-0.25841	0	0.09687	0	0.350778	m	B10-C8-H14-La4-O28	0	0	equal_bothsteps	equal	0	Success at all eik	This sg doesnt have any
1173	MEHRIA_FSR	-0.14053	-0.03521	0.15227	0.03349	0.13303	0.14573	0.07204	0.05276	-0.1388	-0.06935	-0.00506	-0.06623	0.05819	-0.09017	0.00196	0.01659	0.00107	0.03495	0.334766	1	Zn1-H9-C4-S4-N9-O4	0	0	equal_bothsteps	equal	0	This sg doesnt have any	This sg doesnt have any
677	VEYKAO_FSR	0	0	0	0	0.10782	0	0	0	0	0.06734	0	0	0.06421	-0.09593	0.31202	0	0	0	0.332689	mm2	Sn4-H12-C28-N4-O20	0	0	equal_bothsteps	equal	0	Success at all eik	This sg doesnt have any
57	EWAWEG01_FSR	0	0	0	-0.00119	0	0.22574	0.26398	-0.13209	-0.12328	0	-0.00115	0	0	0	0	-0.14432	0	-0.00147	0.319894	2	Hg2-H4-C2-N10-Cl2	0	0	equal_bothsteps	equal	0	Success at all eik	This sg doesnt have any
1244	UGENUP_FSR	0	0	0	0	0.07797	0	0	0	0	-0.31324	0	0	0.06223	0.08602	-0.12109	0	0	0	0.31324	mm2	C28-Cu2-H18-N12-S2	0	0	equal_bothsteps	equal	0	Success at all eik	This sg doesnt have any
116	HEBTOA_FSR	0	0	0	-0.01085	0	0.14687	0.14266	-0.232	0.13928	0	0.00862	0	0	0	0	0.17636	0	-0.00956	0.306021	2	Na6-B10-H4-C2-O22	0	0	equal_bothsteps	equal	0	Success at all eik	This sg doesnt have any
566	DENFUA_FSR	0	0	0	0.13912	0	0	0	0	0	0	-0.30424	0	0	0	0	0	0	0.18063	0.30424	222	Mn4-H12-C20-N20-O8	4	4	equal_bothsteps	notequal	20	Success at all eik	This sg doesnt have any
1105	LOQFEE_FSR	0	0	0	0	-0.1524	0	0	0	0	-0.06585	0	0	-0.20852	-0.03472	0.21791	0	0	0	0.303597	mm2	Zn4-H28-C32-N4-O24	0	0	equal_bothsteps	equal	0	Success at all eik	This sg doesnt have any
26	ESADUZ01_FSR	0	0	0	0	0.30245	0	0	0	0	-0.02947	0	0	0.2123	-0.05302	-0.15612	0	0	0	0.30245	mm2	C28-Cd2-H24-O14	0	0	equal_bothsteps	equal	0	Success at all eik	This sg doesnt have any
576	JOCNUN_FSR	-0.14009	0.0996	-0.1886	0	0.09823	0	0	0	0	0.01216	0	0.16871	-0.05004	0.04221	-0.10437	0	0.01681	0	0.298569	m	C40-H34-Mn2-N14-O14	10	10	equal_bothsteps	equal	10	Success at all eik	This sg doesnt have any
1413	ACRNCU_FSR	0	0	0	0	0.08951	0	0	0	0	-0.00486	0	0	0.00398	-0.08611	-0.28523	0	0	0	0.297971	mm2	Cu8-H12-C12-N4-Cl8	0	0	equal_bothsteps	equal	0	Success at all eik	This sg doesnt have any
81	AVUFED01_FSR	-0.07353	-0.06076	0.14094	0.10979	0.05251	0.08447	0.08768	0.02188	-0.11398	-0.09137	0.09593	-0.07292	0.09793	-0.08874	0.00893	-0.11208	0.11413	0.08208	0.296919	1	Na1-H7-C8-S1-O8	0	0	equal_bothsteps	equal	0	This sg doesnt have any	This sg doesnt have any
16	CIHXOJ_FSR	-0.08762	0.15876	-0.04661	0	-0.11703	0	0	0	0	0.17821	0	0.18889	-0.11639	0.16215	-0.0347	0	-0.03675	0	0.295892	m	Bi2-H16-C20-N2-O20	0	0	equal_bothsteps	equal	0	Success at all eik	This sg doesnt have any
109	EBUQID_FSR	-0.03166	0.0899	-0.03583	0	-0.0944	0	0	0	0	0.17384	0	0.04851	-0.0481	0.21464	-0.12798	0	-0.0794	0	0.295027	m	C24-H18-I4-N6-Pb2	0	0	equal_bothsteps	equal	0	Success at all eik	This sg doesnt have any
66	TIRFUW_FSR	0.00912	-0.00752	-0.01157	0	0.29256	0	0	0	0	-0.02485	0	-0.01217	0.16867	-0.02923	-0.21606	0	-0.01411	0	0.29303	m	In2-H18-C24-O12	0	0	equal_bothsteps	equal	0	Success at all eik	This sg doesnt have any
58	CELYIE_FSR	0.26443	-0.03013	0.1131	0	-0.03081	0	0	0	0	0.00023	0	0.00396	-0.03043	0.0057	-0.00877	0	0.01215	0	0.292676	2/m	Fe1-H8-Pd1-C12-N8	0	0	equal_bothsteps	equal	0	Centro as per csd	Centro as per csd
539	MICDOR_FSR	0	0	0	0	-0.15461	0	0	0	0	-0.13843	0	0	-0.1625	-0.1384	0.19951	0	0	0	0.292173	mm2	C6-H20-Mn4-N4-Se4	20	20	equal_bothsteps	equal	20	Success at all eik	This sg doesnt have any
120	HUSJUC_FSR	-0.09484	0.16041	-0.07159	0	-0.07209	0	0	0	0	0.11763	0	0.14429	-0.09915	0.14299	-0.04877	0	-0.07403	0	0.287933	m	C42-H22-La2-O14	0	0	equal_bothsteps	equal	0	Success at all eik	This sg doesnt have any
749	KULMIP_FSR	0.24227	-0.12423	-0.0656	0	-0.06251	0	0	0	0	-0.04325	0	-0.04973	-0.00753	-0.07096	0.01714	0	0.00821	0	0.287593	m	C14-Cd2-H12-N4-O8	0	0	equal_bothsteps	equal	0	Success at all eik	This sg doesnt have any
955	YAFZUB_FSR	-0.06351	0.22598	-0.09708	0	-0.04314	0	0	0	0	0.07048	0	0.17192	-0.05857	0.09048	-0.01984	0	-0.10107	0	0.286219	m	C14-H24-O20-S2-Zn2	0	0	equal_bothsteps	equal	0	Success at all eik	This sg doesnt have any
975	BOQWEK_FSR	-0.15713	0.21111	-0.07042	0	0.0083	0	0	0	0	0.0454	0	0.11336	0.01471	0.06404	-0.11878	0	-0.06486	0	0.283799	m	C24-H20-N8-O8-Zn2	0	0	equal_bothsteps	equal	0	Success at all eik	This sg doesnt have any
173	MUQVEA_FSR	0	0	0	0	0.0903	0	0	0	0	-0.01816	0	0	0.15381	0.02399	-0.23564	0	0	0	0.282417	mm2	Zn2-B2-H18-C4-N22-Cl2	0	0	equal_bothsteps	equal	0	Success at all eik	This sg doesnt have any
901	AVUJOQ_FSR	0	0	0	0	-0.15024	0	0	0	0	0.15024	0	0	-0.19512	0.19512	0	0	0	0	0.275941	-42m	Cd4-H24-C48-N8-O16	0	0	equal_bothsteps	equal	0	Success at all eik	Success at all eik
1369	TISLOX_FSR	0	0	0	0	0.0316	0	0	0	0	0.0355	0	0	-0.06469	0.06557	-0.25905	0	0	0	0.274938	mm2	C12-Cu4-H8-N4-S4	0	0	equal_bothsteps	equal	0	Success at all eik	This sg doesnt have any
523	SIMZOD02_FSR	-0.05772	0.04161	-0.07732	0.02695	-0.12677	-0.05478	-0.06688	2e-05	0.09663	0.03903	-0.01618	0.05088	-0.14696	0.05725	0.02292	0.10706	-0.12251	-0.00898	0.272657	1	Li1-H5-C5-N2-O5	0	0	equal_bothsteps	equal	0	This sg doesnt have any	This sg doesnt have any
178	NASCAN_FSR	0	0	0	0	0.19067	0	0	0	0	0.16876	0	0	0.14776	0.12948	-0.18696	0	0	0	0.271205	mm2	C6-H20-N4-S4-Zn4	0	0	equal_bothsteps	equal	0	Success at all eik	This sg doesnt have any
988	LOZXIJ_FSR	0	0	0	-0.00429	0	-0.0656	-0.08526	-0.192	0.16396	0	0.02138	0	0	0	0	0.24393	0	0.02471	0.267345	2	Zn2-H20-C24-O10	0	0	equal_bothsteps	equal	0	Success at all eik	This sg doesnt have any
47	UHOYIZ_FSR	0	0	0	0	-0.15914	0	0	0	0	-0.14576	0	0	-0.14168	-0.1257	0.18535	0	0	0	0.265006	mm2	C6-Cd4-H20-N4-Se4	0	0	equal_bothsteps	equal	0	Success at all eik	This sg doesnt have any
663	FAYXEJ02_FSR	0.08017	0.02681	-0.12909	0	0.01715	0	0	0	0	-0.08136	0	0.07281	0.00947	-0.15406	0.11506	0	-0.14853	0	0.262262	m	C8-H12-Ni2-O12	4	4	equal_bothsteps	equal	4	Success at all eik	This sg doesnt have any
688	DUFXOT_FSR	0	0	0	0	-0.05796	0	0	0	0	0.16079	0	0	-0.04174	0.21971	-0.1355	0	0	0	0.261486	mm2	C16-H20-O20-S2-Sr2	0	0	equal_bothsteps	equal	0	Success at all eik	This sg doesnt have any
1313	URACEW_FSR	-0.06486	0.06486	0	0.00212	-0.02806	0.04777	0.04777	-0.04777	0	-0.02806	-0.00217	0.06486	-0.12197	-0.12197	-0.19514	0	0	0	0.260448	3	Cu3-H33-C39-N6-O6	0	0	equal_bothsteps	equal	0	Success at all eik	Success at all eik
413	JOHFIX_FSR	0	0	0	0.03879	0	-0.0664	-0.05402	0.00532	0.10602	0	0.04014	0	0	0	0	0.21321	0	0.14436	0.25754	2	Hg2-H18-C20-N6-O6	0	0	equal_bothsteps	equal	0	Success at all eik	This sg doesnt have any
154	SUZXOA_FSR	0.0235	0.09426	-0.06016	0	-0.21976	0	0	0	0	-0.12604	0	0.07566	-0.1322	-0.01894	-0.13048	0	-0.0313	0	0.254368	m	C12-H10-O6-P2-Sn2	0	0	equal_bothsteps	equal	0	Success at all eik	This sg doesnt have any
177	FAVNEY_FSR	0.13862	-0.16092	-0.02219	0	-0.11846	0	0	0	0	-0.04421	0	-0.20018	-0.06283	-0.06347	0.13802	0	0.03897	0	0.246612	m	Zn2-P2-H8-C12-N2-O10	0	0	equal_bothsteps	equal	0	Success at all eik	This sg doesnt have any
546	DENGAH_FSR	0	0	0	-0.23737	0	0	0	0	0	0	-0.24268	0	0	0	0	0	0	0.15964	0.24268	222	Mn4-H16-C24-N8-O16	4	4	equal_bothsteps	notequal	20	Success at all eik	This sg doesnt have any
112	KEBSOA_FSR	-0.14794	0.15633	-0.02076	0	-0.06494	0	0	0	0	0.07892	0	0.15136	-0.054	0.05935	0.00194	0	-0.02716	0	0.240959	m	C18-H30-La2-O24	0	0	equal_bothsteps	equal	0	Success at all eik	This sg doesnt have any
1177	QOBHIY_FSR	0	0	0	0	-0.16062	0	0	0	0	-0.1555	0	0	-0.12524	-0.12591	0.16267	0	0	0	0.240832	mm2	C6-H20-N4-Te4-Zn4	0	0	equal_bothsteps	equal	0	Success at all eik	This sg doesnt have any
1448	QAVDOG_FSR	2e-05	3e-05	0.00014	1e-05	0.1363	-0.00012	-8e-05	8e-05	-0.00011	-0.05808	0	-0.00018	0.19446	-0.07045	0.12187	-7e-05	2e-05	0	0.240063	mm2	C8-Cu4-H12-N16-O16-S2	4	4	equal_bothsteps	equal	4	Success at all eik	This sg doesnt have any
1261	NOPQIU_FSR	0.05831	-0.03513	0.03283	0.00212	-0.02425	0.00877	-0.00374	0.00044	0.0075	0.02982	0.00281	-0.02183	-0.21729	0.06739	0.038	-0.00205	0.0087	-0.00023	0.239097	m	C24-Cl4-Cu2-H18-N6-S2	0	0	equal_bothsteps	equal	0	Success at all eik	This sg doesnt have any
573	YIJLOV_FSR	0.18196	0.06209	0.1401	9e-05	0.01264	4e-05	6e-05	0.00013	-0.00028	0.01384	0.00025	0.04445	-0.00831	0.01893	0.00557	1e-05	0.11487	3e-05	0.238402	m	C38-H32-Mn2-N4-O16	2	0	notequal_bothsteps	notequal	0	Success at all eik	This sg doesnt have any
487	JUKXIY_FSR	0	0	0	0.06542	0	0	0	0	0	0	-0.07814	0	0	0	0	0	0	0.23761	0.23761	222	Mn2-H12-C24-N4-O8	2	2	equal_bothsteps	notequal	0	Success at all eik	This sg doesnt have any
1335	SACSEV_FSR	0	0	0	0	0.09453	0	0	0	0	0.10796	0	0	0.04541	0.22557	0.05677	0	0	0	0.236995	mm2	Cu2-H8-C8-N4-Cl2	0	0	equal_bothsteps	equal	0	Success at all eik	This sg doesnt have any
1138	PEYGAC_FSR	0	0	0	0	-0.11909	0	0	0	0	0.16916	0	0	-0.14972	0.17073	0.06327	0	0	0	0.235728	mm2	Zn4-H16-C8-N16-Cl8	0	0	equal_bothsteps	equal	0	Success at all eik	This sg doesnt have any
369	VAVQUF_FSR	-0.00262	0.04839	0.18798	-0.0008	-0.0844	-0.00047	-0.00451	-0.00028	0.00106	-0.13439	-0.00083	0.03946	-0.09301	-0.06633	0.12609	0.00101	0.0631	-0.00105	0.235356	m	C38-Co2-H20-N8-O14	2	2	equal_bothsteps	notequal	0	Failed at e36	This sg doesnt have any
421	PILTEM_FSR	0	0	0	0	-0.00818	0	0	0	0	-0.0366	0	0	-0.10501	-0.08648	0.19096	0	0	0	0.23446	mm2	Hg4-H12-C12-S8-N8-Cl4	0	0	equal_bothsteps	equal	0	Success at all eik	This sg doesnt have any
1220	NIPWIT01_FSR	0	0	0	0	0.04742	0	0	0	0	0.13243	0	0	0.0509	0.11478	-0.19747	0	0	0	0.234008	mm2	Zn8-H20-C28-N4-O24	0	0	equal_bothsteps	equal	0	Success at all eik	This sg doesnt have any
131	RUYFOH01_FSR	0	0	0	-0.11446	0	-0.10953	0.0182	-0.19316	-0.03179	0	-0.1256	0	0	0	0	-0.08568	0	-0.06123	0.233298	2	C16-H8-O8-Sn2	0	0	equal_bothsteps	equal	0	Success at all eik	This sg doesnt have any
747	KIDLOZ_FSR	-0.0378	0.13613	-0.14035	0	0.05825	0	0	0	0	-0.13902	0	0.10139	-0.00084	-0.04723	0.04815	0	-0.11796	0	0.232931	m	Cd2-H20-C18-N12-O12	0	0	equal_bothsteps	equal	0	Success at all eik	This sg doesnt have any
320	KIVYIY_FSR	0.17232	-0.11679	-0.00339	0	0.0652	0	0	0	0	-0.06058	0	-0.15935	0.0467	-0.07222	0.03339	0	0.01339	0	0.232675	m	Ba2-C16-H30-N2-O24	0	0	equal_bothsteps	equal	0	Success at all eik	This sg doesnt have any
342	OCEQIX_FSR	0	0	0	0	0.23226	0	0	0	0	0.00257	0	0	0.11862	-0.05621	-0.05646	0	0	0	0.23226	mm2	C20-Co4-H20-N8-O8	12	12	equal_bothsteps	equal	12	Success at all eik	This sg doesnt have any
231	DOKPAV_FSR	0.04115	-0.08856	0.05321	0	0.13419	0	0	0	0	0.00951	0	-0.09487	0.15604	-0.00233	-0.14538	0	0.07074	0	0.231364	m	C42-H42-K2-O28	0	0	equal_bothsteps	equal	0	Success at all eik	This sg doesnt have any
105	BEMLAI_FSR	0	0	0	-0.08774	0	0.02332	0.02444	0.13551	-0.15232	0	-0.10381	0	0	0	0	-0.17021	0	-0.08248	0.230083	2	Li2-H8-C14-O6-F6	0	0	equal_bothsteps	equal	0	Success at all eik	This sg doesnt have any
938	JIZKIO_FSR	0.06135	-0.00714	-0.02825	0	-0.02913	0	0	0	0	0.04674	0	0.07574	0.08755	0.06076	-0.192	0	-0.04103	0	0.229629	m	C28-H28-N8-O8-Zn2	0	0	equal_bothsteps	equal	0	Success at all eik	This sg doesnt have any
1190	BENKOW_FSR	0	0	0	0	-0.1314	0	0	0	0	0.13119	0	0	-0.16223	0.15711	0.03435	0	0	0	0.228434	mm2	Zn4-P4-H16-C8-N12-O16	0	0	equal_bothsteps	equal	0	Success at all eik	This sg doesnt have any
185	VEFTEF_FSR	0	0	0	0.08662	0	0.13727	0.07282	-0.10216	0.0456	0	0.00966	0	0	0	0	0.13464	0	0.09671	0.227723	2	Cu2-H16-C18-I2-N4	0	0	equal_bothsteps	equal	0	Success at all eik	This sg doesnt have any
1101	IVAZUA01_FSR	0	0	0	0	-0.0786	0	0	0	0	0.02546	0	0	0.05006	0.06986	-0.21067	0	0	0	0.227526	mm2	Zn4-H12-C28-N4-O16	0	0	equal_bothsteps	equal	0	Success at all eik	This sg doesnt have any
361	RENWEM01_FSR	-0.19163	0.01014	-0.10936	0	0.04105	0	0	0	0	0.11082	0	-0.07919	-0.02363	0.12487	-0.01711	0	-0.0266	0	0.22742	m	C8-Co2-H12-O12	2	2	equal_bothsteps	notequal	6	Success at all eik	This sg doesnt have any
1268	SEKLEC01_FSR	-0.01097	0.02997	-0.01376	0	-0.02065	0	0	0	0	0.13037	0	0.04943	0.01528	0.08698	-0.20109	0	-0.03814	0	0.22456	m	Cu2-H14-C16-S2-O4	0	0	equal_bothsteps	equal	0	Success at all eik	This sg doesnt have any
1297	NAMCOU_FSR	0	0	0	-0.02908	0	-0.07222	-0.01663	-0.2206	0.01213	0	0.02735	0	0	0	0	-0.02563	0	0.00329	0.22324	2	Cu2-H18-C10-S2-N2-O10	0	2	notequal_bothsteps	equal	0	Success at all eik	This sg doesnt have any
1272	KULCAX_FSR	-0.17851	0.02065	0.07665	0	0.05709	0	0	0	0	0.10206	0	0.00397	0.00429	0.13853	-0.14973	0	0.05124	0	0.222373	m	C12-Cu2-H20-N4-O8	2	2	equal_bothsteps	equal	2	Success at all eik	This sg doesnt have any
36	XAKRUY_FSR	0.01274	-0.00051	0.02173	0	0.0656	0	0	0	0	-0.07087	0	-0.06656	0.14376	-0.1221	-0.03173	0	-0.10868	0	0.221781	m	C6-Cd2-H8-N8-O6-S2	0	0	equal_bothsteps	equal	0	Success at all eik	This sg doesnt have any
459	RUYTOW_FSR	0.15173	-0.15121	-0.00018	-0.05035	-0.00037	0.00086	-0.00131	0.00042	0.00031	0.00037	0.05077	-0.15247	-0.00031	0.00031	0	0.00019	-0.00011	0.00018	0.22007	32	C63-H36-La3-N3-O18	0	0	equal_bothsteps	equal	0	Success at all eik	Success at all eik
49	VOKMUE_FSR	0.00083	-0.00013	-0.00067	0.01217	0.00034	-0.15662	-0.09584	0.18479	-0.06457	1e-05	0.02779	3e-05	4e-05	0.00024	5e-05	-0.0481	-5e-05	0.0325	0.219714	2	Fe2-P2-H18-C6-O8	8	8	equal_bothsteps	equal	8	Success at all eik	This sg doesnt have any
446	SEBMOB_FSR	0	0	0	0.02628	0	0.08747	0.11613	-0.17736	0.05244	0	-0.02207	0	0	0	0	0.02353	0	0.02544	0.219499	2	Li2-H12-C8-N2-O8	0	0	equal_bothsteps	equal	0	Success at all eik	This sg doesnt have any
161	IDIWOH02_FSR	0.04611	0.04228	0.06288	-0.0093	0.02298	-0.02904	-0.05382	-0.01293	0.06641	-0.03641	0.0796	-0.11486	0.06384	0.0216	-0.03843	0.03137	-0.05661	0.09131	0.218239	1	V2-H8-C16-O10	0	0	equal_bothsteps	equal	0	This sg doesnt have any	This sg doesnt have any
93	NIHMUO_FSR	0	0	0	-0.08651	0	-0.04481	-0.01161	-0.17378	0.10468	0	-0.07729	0	0	0	0	0.08449	0	-0.08321	0.217407	2	C24-H16-N2-O4-Pb1	0	0	equal_bothsteps	equal	0	Success at all eik	This sg doesnt have any
1112	QAMFUF02_FSR	-0.15312	0.15312	0	-0.01393	0	0	0	0	0	0	0.01393	0.15312	0	0	0	0	0	0	0.216992	32	Zn3-H18-C42-N12-O36	0	0	equal_bothsteps	equal	0	Success at all eik	Success at all eik
726	CACROP_FSR	-0.0872	0.09943	-0.05726	0	-0.05065	0	0	0	0	0.07879	0	0.07232	-0.06789	0.10754	-0.06691	0	-0.05791	0	0.216908	m	C20-Cd2-H40-N4-O10	0	0	equal_bothsteps	equal	0	Success at all eik	This sg doesnt have any
340	KOSJAF_FSR	0	0	0	0	-0.1402	-0.061	-0.061	0.061	0	-0.14021	0	0	-0.1345	-0.1345	0.10216	0	0	0	0.21591	3m	C24-Co6-H12-O18	0	0	equal_bothsteps	notequal	12	Success at all eik	Success at all eik
1100	EJIROG_FSR	0	0	0	0	0.13854	0	0	0	0	0.1378	0	0	0.10489	0.10531	-0.15622	0	0	0	0.215631	mm2	C16-H24-N4-S4-Zn4	0	0	equal_bothsteps	equal	0	Success at all eik	This sg doesnt have any
1286	SANBUF01_FSR	0.00028	0.0001	0.0003	-0.00196	0.21412	0.00034	0	-0.00011	2e-05	-0.05894	0.00055	7e-05	0.09479	0.02526	-0.01569	-0.00022	0	0.0005	0.214133	mm2	C12-Cu2-H20-N4-O10	2	2	equal_bothsteps	equal	2	Success at all eik	This sg doesnt have any
366	KEKLEU_FSR	0	0	0	0.0069	0	-0.0796	-0.12694	0.14223	-0.0969	0	-0.00881	0	0	0	0	-0.14616	0	-0.00337	0.214034	2	Co2-P2-H20-C6-N2-O16	6	6	equal_bothsteps	notequal	0	Success at all eik	This sg doesnt have any
172	LENRIG_FSR	0	0	0	0	-0.02253	0	0	0	0	0.15492	0	0	-0.06069	0.13856	-0.15019	0	0	0	0.213165	mm2	C36-F4-H28-N8-O12-S4-Zn4	0	0	equal_bothsteps	equal	0	Success at all eik	This sg doesnt have any
1439	SIKYUI_FSR	0	0	0	0.00267	0	-0.03678	-0.02845	0.17774	0.11109	0	0.02198	0	0	0	0	0.10454	0	-0.00287	0.212662	2	C10-Cu1-H10-I1-O2-P2	0	0	equal_bothsteps	equal	0	Success at all eik	This sg doesnt have any
1037	HOYQAP_FSR	0	0	0	0	-0.07436	0	0	0	0	-0.0749	0	0	-0.05401	-0.08958	0.18269	0	0	0	0.210517	mm2	Zn4-H20-C18-N8-O6	0	0	equal_bothsteps	equal	0	Success at all eik	This sg doesnt have any
948	XEZMIA_FSR	-0.15102	0.11749	0.02952	0	-0.0537	0	0	0	0	0.06518	0	0.07314	-0.02154	0.07818	-0.07639	0	-0.01375	0	0.210112	m	Zn2-H22-C30-N2-O12	0	0	equal_bothsteps	equal	0	Success at all eik	This sg doesnt have any
536	VETBAA_FSR	-0.00426	-0.11331	-0.0083	0	0.01646	0	0	0	0	0.03414	0	-0.1293	0.01611	0.10782	-0.16494	0	0.02395	0	0.208176	m	C40-H30-Mn2-N10-O14	2	2	equal_bothsteps	notequal	10	Success at all eik	This sg doesnt have any
559	VEWKEQ_FSR	-0.11366	-0.03542	0.0684	-0.03553	0.0082	-0.01832	-0.05101	0.03044	0.02813	-0.00092	-0.02852	-0.00123	0.11951	-0.00339	-0.02808	0.01593	0.10978	-0.02779	0.207684	1	Mn1-H19-C23-N5-O5	5	5	equal_bothsteps	equal	5	This sg doesnt have any	This sg doesnt have any
1219	IWOWIB_FSR	0	0	0	0.0147	0	-0.15984	-0.17914	0.08319	0.05847	0	0.02097	0	0	0	0	0.08105	0	0.04517	0.207051	2	C27-H20-N6-O12-Zn1	0	0	equal_bothsteps	equal	0	Success at all eik	This sg doesnt have any
378	VEWJUF_FSR	-0.14811	-0.03426	0.0789	-0.01073	0.00875	0.0022	-0.02537	-0.03188	0.03786	0.01526	-0.00807	0.00774	0.08738	-0.00897	-0.04509	0.01432	0.09849	-0.00637	0.206844	1	Co1-H19-C23-N3-O8	3	3	equal_bothsteps	equal	3	This sg doesnt have any	This sg doesnt have any
608	LIMLIF_FSR	0	0	0	0	0.11195	0	0	0	0	-0.00338	0	0	0.1178	-0.00555	-0.16939	0	0	0	0.206399	mm2	Ni2-H24-C16-S2-N4-O8	4	0	notequal_bothsteps	equal	4	Success at all eik	This sg doesnt have any
727	AFUKIW_FSR	-0.15358	0.12219	0.0113	0	-0.02861	0	0	0	0	0.01143	0	0.0988	-0.03698	0.01868	-0.00266	0	0.01509	0	0.202256	m	C14-Cd2-H18-N2-O14	0	0	equal_bothsteps	equal	0	Success at all eik	This sg doesnt have any
377	UNOCOQ03_FSR	0	0	0	-0.19796	0	0	0	0	0	0	0.20013	0	0	0	0	0	0	0	0.20013	622	K2-Co2-H6-C6-O12	6	6	equal_bothsteps	equal	6	Success at all eik	Failed at e25
993	XILPUE_FSR	-0.101	0.01245	0.0638	0	0.10006	0	0	0	0	-0.06094	0	0.01583	0.12812	-0.08742	-0.0067	0	-0.00754	0	0.19877	m	Zn2-H16-C12-N4-Cl4-O4	0	0	equal_bothsteps	equal	0	Success at all eik	This sg doesnt have any
751	LOXZUV01_FSR	0	0	0	-0.16368	0	0	0	0	0	0	-0.13096	0	0	0	0	0	0	-0.1985	0.1985	222	C24-Cd2-H24-O12	0	0	equal_bothsteps	equal	0	Success at all eik	This sg doesnt have any
1327	HOSPEL_FSR	-0.12616	-0.08237	0.03295	0	0.11162	0	0	0	0	-0.02207	0	-0.06998	0.0419	-0.01433	-0.10774	0	-0.00776	0	0.197731	m	C12-Cl2-Cu4-H8-N10	0	0	equal_bothsteps	equal	0	Success at all eik	This sg doesnt have any
94	LORMOU01_FSR	0	0	0	-0.01751	0	0.0055	0.06512	-0.1715	0.07175	0	-0.00891	0	0	0	0	0.08971	0	-0.02551	0.197181	2	Na2-B2-H16-C16-O20	0	0	equal_bothsteps	equal	0	Success at all eik	This sg doesnt have any
175	NAMCUA_FSR	0	0	0	-0.05501	0	-0.11153	-0.02111	-0.18804	0.04518	0	-0.03011	0	0	0	0	-0.0068	0	-0.04557	0.196857	2	Zn2-H18-C10-S2-N2-O10	0	0	equal_bothsteps	equal	0	Success at all eik	This sg doesnt have any
699	HUJGUP_FSR	0	0	0	0	0.04918	0	0	0	0	-0.06656	0	0	0.0421	-0.14598	0.12378	0	0	0	0.19597	mm2	Sn4-H52-C36-N4-O12	0	0	equal_bothsteps	equal	0	Success at all eik	This sg doesnt have any
505	EGIROD_FSR	0.05199	0.11487	-0.08216	0	-0.08257	0	0	0	0	0.01769	0	0.00506	0.00231	-0.0143	-0.10058	0	-0.08265	0	0.195469	m	C12-H14-Mn2-N18-O10	2	2	equal_bothsteps	notequal	10	Success at all eik	This sg doesnt have any
2	ROZXAH_FSR	-0.15265	0.08453	0.0517	0	-0.04838	0	0	0	0	0.11397	0	0.07368	-0.01436	0.1199	-0.121	0	0.0347	0	0.194953	m	Al2-Cd2-B10-H36-C10-N8-O20	0	0	equal_bothsteps	equal	0	Success at all eik	This sg doesnt have any
601	LOHKOK_FSR	0	0	0	0	0.09117	0	0	0	0	0.01115	0	0	0.04646	0.00966	-0.18865	0	0	0	0.194527	mm2	Na4-H24-C32-N12-O8	0	0	equal_bothsteps	equal	0	Success at all eik	This sg doesnt have any
590	UWEMEQ_FSR	0.01611	-0.00485	-0.00857	0	0.02114	0	0	0	0	-0.00382	0	-0.00253	0.09419	-0.01783	-0.14689	0	0.07791	0	0.193371	m	Na2-H12-C6-N18-O6	0	0	equal_bothsteps	equal	0	Success at all eik	This sg doesnt have any
409	FEZMUT_FSR	0.10266	-0.00293	-0.08108	0	0.00259	0	0	0	0	-0.00611	0	-0.00188	0.08742	-0.00339	-0.11278	0	0.02246	0	0.193096	m	K2-H50-C26-N4-O16	0	0	equal_bothsteps	equal	0	Success at all eik	This sg doesnt have any
176	WOQJIW03_FSR	0	0	0	0	0.1126	0	0	0	0	0.12494	0	0	0.10217	0.09852	-0.13035	0	0	0	0.192707	mm2	C10-H28-N4-Te4-Zn4	0	0	equal_bothsteps	equal	0	Success at all eik	This sg doesnt have any
967	RIBNUO_FSR	0	0	0	0.00908	0	0.05168	0.03631	-0.11419	0.10878	0	-0.00155	0	0	0	0	0.18676	0	0.04047	0.192189	2	C34-H38-N6-O8-Zn2	0	0	equal_bothsteps	equal	0	Success at all eik	This sg doesnt have any
939	NADWOG_FSR	0	0	0	0.00478	0	0.0941	0.102	-0.15204	0.05485	0	-0.00993	0	0	0	0	0.05519	0	0.0086	0.191383	2	Zn2-P2-H26-C22-N4-O10	0	0	equal_bothsteps	equal	0	Success at all eik	This sg doesnt have any
77	BALFAV01_FSR	0.11101	0.04638	-0.00834	-0.01743	-0.00301	0.10872	0.08003	0.04119	0.07833	0.00654	-0.00372	0.03508	-0.00117	0.00262	-0.01005	0.05155	0.01205	-0.02029	0.190643	1	C10-H8-Mo2-N2-O6	0	0	equal_bothsteps	equal	0	Success at all eik	This sg doesnt have any
1392	IPINAY_FSR	0	0	0	0	-0.04013	0	0	0	0	0.05765	0	0	0.01021	0.18155	-0.05432	0	0	0	0.189777	mm2	C24-Cu4-H16-N4-O8	0	0	equal_bothsteps	equal	0	Success at all eik	This sg doesnt have any
631	ODONUR_FSR	0	0	0	0.02664	0	0.03333	0.04575	0.03571	-0.18008	0	-0.01163	0	0	0	0	-0.03434	0	-0.00939	0.189558	2	Ni4-H8-C16-S4-N8-O20	0	0	equal_bothsteps	equal	0	Success at all eik	This sg doesnt have any
1159	NADCUS_FSR	0.13267	-0.00443	-0.10479	0	-0.02147	0	0	0	0	-0.08156	0	-0.00847	-0.02848	-0.06265	0.0618	0	-0.1401	0	0.188695	m	C42-H40-N4-O18-S2-Zn4	0	0	equal_bothsteps	equal	0	Success at all eik	This sg doesnt have any
587	WOFBAV_FSR	0	0	0	0	-0.05968	-0.12625	-0.12625	0.12625	0	-0.05968	0	0	-0.06053	-0.06053	0.13803	0	0	0	0.188255	3m	C12-H24-N14-Na6-O18	0	0	equal_bothsteps	equal	0	Success at all eik	Success at all eik
1278	HAQFAI_FSR	0.12653	-0.1132	0.05842	0	0.00466	0	0	0	0	-0.02054	0	-0.06253	0.04149	-0.03807	-0.13313	0	0.11091	0	0.187278	m	C18-Cu2-H20-N6-O8-S2	0	0	equal_bothsteps	equal	0	Success at all eik	This sg doesnt have any
680	KIVYEU_FSR	-0.09331	0.09216	-0.02291	1e-05	-0.03799	0.00012	0.00012	0.00017	-6e-05	0.07982	4e-05	0.16905	-0.02826	0.0494	-0.0031	0	-0.01327	2e-05	0.186947	m	C16-H30-N2-O24-Sr2	0	0	equal_bothsteps	equal	0	Success at all eik	This sg doesnt have any
452	NOKCOH_FSR	0	0	0	0.03735	0	-0.01211	0.05306	-0.12808	0.11184	0	0.05449	0	0	0	0	0.05514	0	0.00105	0.186272	2	C20-H20-Li2-N2-O6	0	0	equal_bothsteps	equal	0	Success at all eik	This sg doesnt have any
556	TARDOF_FSR	0	0	0	0	0.01045	0	0	0	0	-0.17673	0	0	0.01297	-0.12567	0.13685	0	0	0	0.18625	mm2	C12-H16-N2-Na2-O10	0	0	equal_bothsteps	equal	0	Success at all eik	This sg doesnt have any
1365	YOVZAL_FSR	0.01198	0.02928	-0.05466	0	-0.00887	0	0	0	0	0.00849	0	-0.01216	0.04527	0.0982	0.10103	0	-0.10936	0	0.184126	m	Cu4-H20-C28-N12-O2	0	0	equal_bothsteps	equal	0	Success at all eik	This sg doesnt have any
357	VIGCAR_FSR	0.0447	-0.002	0.0162	0	-0.09936	0	0	0	0	-0.01097	0	0.05378	-0.0841	-0.02791	0.14859	0	0.04759	0	0.184027	m	C8-Co2-H10-N4-O8-P2	6	6	equal_bothsteps	equal	6	Success at all eik	This sg doesnt have any
968	MOFTIL01_FSR	0.13771	-0.10146	0.01583	0	-0.05964	0	0	0	0	0.04298	0	-0.0796	-0.03325	-0.00064	0.00258	0	-3e-05	0	0.18352	m	Zn2-H8-C16-N8-O4	0	0	equal_bothsteps	equal	0	Success at all eik	This sg doesnt have any
194	QORBAA_FSR	0	0	0	0	0.06949	0	0	0	0	0.10077	0	0	0.14016	0.11614	0.02257	0	0	0	0.18342	mm2	C12-Cl2-Cu2-H8-N4-S2	0	0	equal_bothsteps	equal	0	Success at all eik	This sg doesnt have any
1202	BEKVOD_FSR	0	0	0	0	-0.01572	-0.12909	-0.12909	0.12909	0	-0.01573	0	0	0.027	0.027	-0.1027	0	0	0	0.183237	3m	C48-H36-N24-O12-Zn6	0	0	equal_bothsteps	equal	0	Success at all eik	Success at all eik
1349	VUQJEX_FSR	0.11058	0.06409	-0.03849	0	-0.11377	0	0	0	0	0.03313	0	0.06656	-0.04933	0.0208	0.09197	0	-0.00342	0	0.182159	m	Br2-C12-Cu4-H8-N10	0	0	equal_bothsteps	equal	0	Success at all eik	This sg doesnt have any
1275	IGUBIX_FSR	-0.00314	0.0503	-0.04284	0	-0.01327	0	0	0	0	0.14818	0	0.10506	-0.01297	0.05523	-0.02264	0	0.02198	0	0.181645	m	Cu2-H16-C26-Br6-N4-O2	0	0	equal_bothsteps	equal	0	Success at all eik	This sg doesnt have any
752	RIXCIL_FSR	0	0	0	0.0294	0	0.00194	0.04109	0.17056	-0.03262	0	0.03282	0	0	0	0	-0.04176	0	0.03166	0.18144	2	C24-Cd2-H16-N4-O12	0	0	equal_bothsteps	equal	0	Success at all eik	This sg doesnt have any
254	NEZQER_FSR	0.11699	-0.11699	0	-0.03399	-0.03452	-0.03886	-0.03886	0.03886	0	-0.03452	0.03399	-0.11699	-0.00303	-0.00303	0.01134	0	0	0	0.180943	3	Li6-H42-C39-O15	0	0	equal_bothsteps	equal	0	Success at all eik	Success at all eik
1050	CIMFIP_FSR	0	0	0	0	0.18049	0	0	0	0	0.01273	0	0	0.07399	-0.00815	-0.13544	0	0	0	0.18049	mm2	Zn4-H12-C16-N12-O16	0	0	equal_bothsteps	equal	0	Success at all eik	This sg doesnt have any
575	EZUREW_FSR	-0.13565	-0.07413	-0.01954	0	-0.03449	0	0	0	0	0.04968	0	-0.11196	-0.06304	0.02651	0.0514	0	0.15759	0	0.179323	m	C20-H16-Mo2-N4-O10-V2	2	2	equal_bothsteps	notequal	0	Success at all eik	This sg doesnt have any
1266	HEYREL_FSR	0	0	0	0.10623	0	-0.11949	0.02338	0.00122	-0.02471	0	0.00657	0	0	0	0	-0.01587	0	-0.10973	0.179277	2	Cu2-H30-C26-S2-N2-O8	0	0	equal_bothsteps	notequal	2	Success at all eik	This sg doesnt have any
501	CINCEI_FSR	0.12466	-0.12466	0	0.03167	0	0	0	0	0	0	-0.03167	-0.12466	0	0	0	0	0	0	0.179118	32	Li3-H9-C21-N6-O18	0	0	equal_bothsteps	equal	0	Success at all eik	Success at all eik
118	UNUQAX_FSR	-0.09112	-0.01675	0.08033	0	0.08009	0	0	0	0	0.0004	0	-0.00967	-0.02086	-0.04549	0.10366	0	0.03385	0	0.179083	m	C38-H48-Li2-O2-P2	0	0	equal_bothsteps	equal	0	Success at all eik	This sg doesnt have any
473	OJENUO_FSR	0	0	0	0	0.01216	0	0	0	0	-0.06235	0	0	0.02569	-0.06268	0.16557	0	0	0	0.178892	mm2	C8-H4-K4-N8-O8	0	0	equal_bothsteps	equal	0	Success at all eik	This sg doesnt have any
1277	IPEPIC_FSR	-0.03583	0.06659	-0.12958	0	-0.02918	0	0	0	0	-0.02348	0	0.05112	-0.01621	-0.03574	0.0806	0	-0.12291	0	0.178632	m	C24-Cl2-Cu2-H16-N10-O8	0	2	notequal_bothsteps	equal	0	Success at all eik	This sg doesnt have any
258	PIHWAG_FSR	-0.03894	0.08831	-0.06695	0	0.05925	0	0	0	0	-0.0749	0	0.07426	0.05366	-0.08115	0.03628	0	-0.06575	0	0.178397	m	C48-H32-La2-N2-O14-S6	0	0	equal_bothsteps	equal	0	Success at all eik	This sg doesnt have any
1368	KIWTAM_FSR	0	0	0	0	0.00391	0	0	0	0	0.10162	0	0	-0.01415	0.15013	0.09399	0	0	0	0.177689	mm2	Cu4-H20-C20-N16	0	0	equal_bothsteps	equal	0	Success at all eik	This sg doesnt have any
455	OFOJOL_FSR	0	0	0	-0.03499	0	0.03191	0.00266	-0.085	0.1236	0	-0.09519	0	0	0	0	0.10313	0	-0.05281	0.17768	2	Li2-H10-C6-O6	0	0	equal_bothsteps	equal	0	Success at all eik	This sg doesnt have any
607	QOZNAV_FSR	0	0	0	0	-0.07337	0	0	0	0	0.07498	0	0	-0.10817	0.13683	-0.03358	0	0	0	0.177625	mm2	C4-H8-N20-Na4-O12	0	0	equal_bothsteps	equal	0	Success at all eik	This sg doesnt have any
1308	REDWII_FSR	0	0	0	-0.02497	0	0.14112	0.13002	-0.00349	-0.09952	0	-0.06493	0	0	0	0	-0.10645	0	-0.01495	0.176175	2	Cu2-H24-C16-S2-N4-O10	2	2	equal_bothsteps	equal	2	Success at all eik	This sg doesnt have any
380	EMEFAD_FSR	0.05474	-0.05474	0	-0.02991	0.035	-0.09991	-0.09991	0.09991	0	0.03491	0.02982	-0.05474	0.11246	0.11246	-0.07493	0	0	0	0.17581	3	C18-Co3-H12-N3-O10-P1	9	9	equal_bothsteps	notequal	3	Success at all eik	Success at all eik
207	GETRED01_FSR	0	0	0	0	0.07859	0	0	0	0	0.0328	0	0	0.11068	0.02515	-0.13421	0	0	0	0.175769	mm2	Bi4-H36-C40-Cl8-O16	0	0	equal_bothsteps	equal	0	Success at all eik	This sg doesnt have any
19	PGALSB_FSR	0	0	0	0	-0.09358	0	0	0	0	-0.17568	0	0	-0.04666	0.01752	-0.08114	0	0	0	0.17568	mm2	C12-H6-O6-Sb2	0	0	equal_bothsteps	equal	0	Success at all eik	This sg doesnt have any
1062	RUSQIG_FSR	-0.04705	0.06756	-0.04864	0	-0.02166	0	0	0	0	0.09894	0	0.04363	-0.02888	0.11347	-0.08863	0	-0.01812	0	0.175476	m	C12-H24-N16-O16-Zn4	0	0	equal_bothsteps	equal	0	Success at all eik	This sg doesnt have any
280	KAVYEN_FSR	-0.09435	0.03009	-0.0476	0	-0.07479	0	0	0	0	-0.01815	0	0.04385	-0.07227	-0.01435	-0.0789	0	-0.05547	0	0.174829	m	C40-H56-N16-O24-V8-Zn4	0	0	equal_bothsteps	equal	0	Success at all eik	This sg doesnt have any
130	TAKSAZ_FSR	0.0156	-0.03247	-0.15017	0	-0.00012	0	0	0	0	0.08918	0	-0.05867	0.05697	0.10327	-0.07121	0	-0.03779	0	0.174758	m	Tl2-H10-C6-N4-O8	0	0	equal_bothsteps	equal	0	Success at all eik	This sg doesnt have any
1078	LOVQUI_FSR	0	0	0	-0.07326	0	0.02661	0.04195	0.02326	-0.05525	0	-0.02577	0	0	0	0	-0.15607	0	-0.0326	0.173415	2	Zn2-H56-C40-S4-N20-O16	0	0	equal_bothsteps	equal	0	Success at all eik	This sg doesnt have any
636	QAYKUZ_FSR	0	0	0	0.08273	0	0.11429	0.06375	-0.01789	0.03968	0	0.04827	0	0	0	0	0.07088	0	0.0716	0.172912	2	C26-H16-N2-Ni1-O10	2	2	equal_bothsteps	notequal	0	Success at all eik	This sg doesnt have any
164	LONSIQ_FSR	-0.05757	0.0155	-0.07298	0	0.03121	0	0	0	0	-0.03564	0	-0.02069	0.02535	-0.05078	0.02928	0	-0.14638	0	0.17196	m	C20-H16-N4-O6-W2	0	0	equal_bothsteps	equal	0	Success at all eik	This sg doesnt have any
999	POFJOK_FSR	0	0	0	0.00469	0	-0.04739	-0.1152	-0.07471	0.1029	0	0.00375	0	0	0	0	0.12164	0	-0.01653	0.171625	2	C16-H12-I2-O12-Zn2	0	0	equal_bothsteps	equal	0	Success at all eik	This sg doesnt have any
570	VAFYOQ_FSR	-0.05516	0.01212	-0.08109	0	0.0282	0	0	0	0	-0.05135	0	-0.01414	0.0161	-0.08019	0.01077	0	-0.14145	0	0.170979	m	C20-H16-Mo2-N4-O6	0	0	equal_bothsteps	equal	0	Success at all eik	This sg doesnt have any
257	KOJCUI_FSR	0	0	0	0	-0.11448	-0.00187	-0.00018	-0.0001	0.0007	0.15569	0	0	-0.12531	0.111	0.01476	0.00024	0	0	0.168055	mm2	C56-H28-Mn4-N12-O32	20	20	equal_bothsteps	equal	20	Success at all eik	This sg doesnt have any
390	HOYMIT_FSR	0	0	0	-0.16779	0	0	0	0	0	0	-0.10985	0	0	0	0	0	0	-0.05713	0.16779	222	Hg4-H36-C48-I8-N8-Cl4	0	0	equal_bothsteps	equal	0	Success at all eik	This sg doesnt have any
1208	LUWSOL_FSR	0	0	0	0	0.08888	0	0	0	0	-0.05643	0	0	0.10935	-0.03845	-0.12061	0	0	0	0.16728	mm2	Zn4-H60-C48-S4-N12-O16	0	0	equal_bothsteps	equal	0	Success at all eik	This sg doesnt have any
1374	OFIZAF_FSR	-0.08286	-0.00259	0.02594	0	-0.13096	0	0	0	0	0.06469	0	-0.00502	-0.09197	0.04685	-0.10082	0	0.00267	0	0.166405	m	Cu4-H8-C10-S2-Br2-N2	0	0	equal_bothsteps	equal	0	Success at all eik	This sg doesnt have any
7	ELAJUX_FSR	-0.13301	0.00733	0.05882	0	0.05103	0	0	0	0	0.09992	0	-0.05698	0.04648	0.02843	-0.0426	0	-0.01723	0	0.166386	m	Bi2-H38-C24-S2-N4-O8	0	0	equal_bothsteps	equal	0	Success at all eik	This sg doesnt have any
964	JOYZEE_FSR	0	0	0	-0.02471	0	0.04658	0.13208	-0.09729	-0.0079	0	-0.01907	0	0	0	0	-0.00072	0	-0.02457	0.165338	2	Zn2-H16-C12-N4-O10	0	0	equal_bothsteps	equal	0	Success at all eik	This sg doesnt have any
193	SAWVOB_FSR	-0.00024	0.01775	-0.01565	0.00943	-0.03301	0.06254	0.12718	0.07075	-0.02673	-0.01861	-0.02919	-0.00761	-0.0725	0.01377	-0.05432	0.03446	0.01032	0.03775	0.164819	1	Cu1-H9-C13-Br1-N1	0	0	equal_bothsteps	equal	0	This sg doesnt have any	This sg doesnt have any
1015	NOKDIA_FSR	0	0	0	0.02128	0	0.05198	0.06256	-0.1333	0.06105	0	0.04185	0	0	0	0	0.03727	0	0.00356	0.164806	2	Zn2-H28-C28-N8-O8	0	0	equal_bothsteps	equal	0	Success at all eik	This sg doesnt have any
1179	OBERUL_FSR	-0.01016	-0.00158	0.0328	-0.03169	0.03157	-0.04072	-0.08077	-0.04526	0.06445	0.05818	-0.06173	-0.03483	0.03777	0.05718	-0.05801	0.05313	0.05346	-0.04099	0.164199	1	Zn1-H12-C16-N2-O8	0	0	equal_bothsteps	equal	0	This sg doesnt have any	This sg doesnt have any
1148	OHUXAS_FSR	0	0	0	0	0.07358	0	0	0	0	0.05905	0	0	0.06467	0.0829	-0.12612	0	0	0	0.164198	mm2	Zn4-H32-C40-N24-O16	0	0	equal_bothsteps	equal	0	Success at all eik	This sg doesnt have any
1407	HORWIU_FSR	0	0	0	0	0.10111	0	0	0	0	0.062	0	0	0.07661	0.08197	-0.11935	0	0	0	0.163807	mm2	C6-Cu4-H6-I4-N6	0	0	equal_bothsteps	equal	0	Success at all eik	This sg doesnt have any
191	RITMAL_FSR	0.08002	0.1059	0.09198	0	-0.02491	0	0	0	0	-0.00324	0	0.0258	-0.0025	-0.00541	0.02229	0	0.06558	0	0.163416	m	C6-Cl2-Cu2-H12-S4	0	0	equal_bothsteps	equal	0	Success at all eik	This sg doesnt have any
344	NAFQIV_FSR	0	0	0	-0.00558	0	0	0	0	0	0	0.16327	0	0	0	0	0	0	0.02999	0.16327	222	Co4-H16-C16-O20	12	12	equal_bothsteps	notequal	0	Success at all eik	This sg doesnt have any
304	HESKEY_FSR	0	0	0	0	-0.07955	0	0	0	0	0.04418	0	0	-0.1107	0.0926	0.07564	0	0	0	0.162944	mm2	C18-Ca2-H32-O24	0	0	equal_bothsteps	equal	0	Success at all eik	This sg doesnt have any
1191	RUVBAN_FSR	0	0	0	-0.06119	0	-0.02724	-0.04225	-0.07014	0.12038	0	-0.02537	0	0	0	0	0.13429	0	-0.0829	0.162843	2	C18-H12-N6-O4-Zn1	0	0	equal_bothsteps	equal	0	Success at all eik	This sg doesnt have any
1003	SEYVIC01_FSR	-0.08972	0.11311	-0.0191	0	-0.0707	0	0	0	0	-0.03583	0	0.06912	-0.03825	-0.03253	0.06134	0	-0.01136	0	0.161944	m	C20-H20-N8-O8-Zn2	0	0	equal_bothsteps	equal	0	Success at all eik	This sg doesnt have any
406	HOYLOY_FSR	0	0	0	0.16169	0	0	0	0	0	0	0.1094	0	0	0	0	0	0	0.05362	0.16169	222	Hg4-H36-C48-Br8-N8-Cl4	0	0	equal_bothsteps	equal	0	Success at all eik	This sg doesnt have any
337	KULJEI_FSR	0	0	0	0	0.16139	0	0	0	0	0.00788	0	0	0.1114	-0.01653	-0.01153	0	0	0	0.16139	mm2	Bi8-C28-H12-N4-O24	0	0	equal_bothsteps	equal	0	Success at all eik	This sg doesnt have any
354	NABCIE_FSR	0	0	0	0	-0.16106	0	0	0	0	0.16102	0	0	0.06092	-0.06092	0	0	0	0	0.16106	-42m	Co2-H40-C48-N8-F4	2	2	equal_bothsteps	notequal	0	Success at all eik	Success at all eik
1318	OFIYUY_FSR	-0.07377	0.00458	0.02726	0	-0.12397	0	0	0	0	0.05437	0	0.00021	-0.09759	0.04693	-0.10248	0	0.00704	0	0.160283	m	Cu4-H8-C10-S2-N2-Cl2	0	0	equal_bothsteps	equal	0	Success at all eik	This sg doesnt have any
1114	MAVSOS_FSR	0	0	0	0	-0.04638	0	0	0	0	0.10616	0	0	-0.04613	0.15019	-0.03019	0	0	0	0.159989	mm2	Zn4-H24-C32-S8-N16	0	0	equal_bothsteps	equal	0	Success at all eik	This sg doesnt have any
929	JIRLAA_FSR	-0.01376	0.01143	0.01103	0	-0.15747	0	0	0	0	0.046	0	0.00853	-0.0899	-0.01028	0.08855	0	0.00316	0	0.159713	m	K4-Cd8-B4-H24-C32-O52	0	0	equal_bothsteps	equal	0	Success at all eik	This sg doesnt have any
1042	CEGJOO_FSR	0	0	0	0	0.02341	0	0	0	0	0.08159	0	0	0.03553	0.06866	-0.13971	0	0	0	0.159673	mm2	C16-H16-N8-O12-Zn4	0	0	equal_bothsteps	equal	0	Success at all eik	This sg doesnt have any
145	EKIHAI_FSR	0	0	0	-0.06478	0	0.04234	0.00777	0.11852	-0.06408	0	-0.0853	0	0	0	0	-0.03713	0	-0.05954	0.159655	2	Mn2-H18-C10-S2-N2-O10	10	10	equal_bothsteps	equal	10	Success at all eik	This sg doesnt have any
1150	LUWVUU_FSR	0	0	0	0	-0.02807	0	0	0	0	-0.06493	0	0	-0.02674	-0.06346	0.14392	0	0	0	0.159547	mm2	Zn4-H40-C48-N8-O16	0	0	equal_bothsteps	equal	0	Success at all eik	This sg doesnt have any
195	SODKON_FSR	-0.11027	0.11027	0	0	0.03079	0	0	0	0	0.03078	0	0.11027	-0.01093	-0.01093	0.00011	0	0	0	0.158956	3m	Cu6-H30-C12-S6-I6-N6	0	0	equal_bothsteps	equal	0	Success at all eik	Success at all eik
1353	LEFJAH01_FSR	0	0	0	0.03847	0	-0.00913	-0.01317	-0.05668	-0.14711	0	0.00336	0	0	0	0	-0.06419	0	-0.01823	0.158236	2	C8-Cu2-H18-N2-O12	0	2	notequal_bothsteps	equal	0	Success at all eik	This sg doesnt have any
13	CEHQOX_FSR	0	0	0	0.06174	0	-0.14505	-0.09718	-0.01457	0.03332	0	0.04457	0	0	0	0	-0.02327	0	-0.00112	0.157854	2	Bi4-H6-C14-N2-O12	0	0	equal_bothsteps	equal	0	Success at all eik	This sg doesnt have any
1262	HEYQUA_FSR	0	0	0	-0.0834	0	0.10011	-0.03439	-0.01798	0.0215	0	0.0007	0	0	0	0	0.00042	0	0.10476	0.157642	2	Cu2-H30-C26-S2-N2-O8	0	0	equal_bothsteps	equal	0	Success at all eik	This sg doesnt have any
1386	CETVAA_FSR	0.05553	0.04739	-0.07294	0	0.05865	0	0	0	0	0.00943	0	0.00275	0.12251	-0.0923	-0.01712	0	-0.02089	0	0.157538	m	C66-Cl4-Cu2-H48-N8	0	2	notequal_bothsteps	equal	0	Success at all eik	This sg doesnt have any
1276	YEJBAQ_FSR	-0.09841	-0.05274	-0.02644	0	-0.05351	0	0	0	0	-0.06951	0	-0.01387	0.00033	-0.08464	-0.08086	0	-0.04241	0	0.156867	m	C26-Cu2-H22-N2-O8	0	2	notequal_bothsteps	equal	0	Success at all eik	This sg doesnt have any
326	PEGXUU_FSR	0	0	0	-0.05686	0	0.02742	0.00602	-0.1442	0.04886	0	-0.03549	0	0	0	0	0.0637	0	-0.01448	0.15645	2	Bi2-H18-C10-S2-N2-Cl2-O4	0	0	equal_bothsteps	equal	0	Success at all eik	This sg doesnt have any
742	TEJSAE_FSR	0	0	0	-0.011	0	-0.03651	-0.07901	0.1307	-0.0291	0	0.01529	0	0	0	0	-0.00283	0	-0.01258	0.156223	2	Cd2-H12-C18-S2-O8	0	0	equal_bothsteps	equal	0	Success at all eik	This sg doesnt have any
129	OMEDOZ_FSR	0	0	0	0.02546	0	0.09837	0.05551	0.05562	0.0275	0	0.00578	0	0	0	0	0.14111	0	0.03256	0.155824	2	Tl2-B2-H28-C32-N12	0	0	equal_bothsteps	equal	0	Success at all eik	This sg doesnt have any
106	ROPWEA_FSR	0	0	0	-0.01017	0	0.00475	-0.04128	-0.13927	0.05571	0	-0.00737	0	0	0	0	0.03201	0	-0.0593	0.15575	2	Mo2-H24-C30-N4-O12	0	0	equal_bothsteps	equal	0	Success at all eik	This sg doesnt have any
750	WEMBEX_FSR	0	0	0	-0.0842	0	0	0	0	0	0	-0.15568	0	0	0	0	0	0	-0.07897	0.15568	222	Cd2-H20-C20-N12-Cl4-O8	0	0	equal_bothsteps	equal	0	Success at all eik	This sg doesnt have any
343	DENTAS_FSR	0	0	0	0	0.06105	0	0	0	0	-0.094	0	0	0.07328	-0.11854	-0.06936	0	0	0	0.155668	mm2	C13-Cl2-Co1-H14-N2	3	3	equal_bothsteps	equal	3	Success at all eik	This sg doesnt have any
1030	LASMUP_FSR	-0.01906	0.05465	0.01541	0	0.10174	0	0	0	0	-0.03009	0	0.06177	0.12627	-0.02762	-0.07881	0	0.02717	0	0.155569	m	C20-H14-N6-O10-Zn2	0	0	equal_bothsteps	equal	0	Success at all eik	This sg doesnt have any
435	AWOLUU_FSR	0	0	0	0	-0.04723	0	0	0	0	-0.06348	0	0	-0.06722	-0.07368	0.11926	0	0	0	0.155468	mm2	C24-H40-K4-N8-O14-S4	0	0	equal_bothsteps	equal	0	Success at all eik	This sg doesnt have any
997	EKEKEL_FSR	0	0	0	0	0.00657	0	0	0	0	0.06799	0	0	0.01033	0.09026	-0.12554	0	0	0	0.154964	mm2	Zn12-P8-H32-C56-O40	0	0	equal_bothsteps	equal	0	Success at all eik	This sg doesnt have any
425	HOSPIQ_FSR	0.01501	-0.11369	0.07797	0	-0.05143	0	0	0	0	-0.0002	0	-0.09296	-0.07496	-0.00253	0.09499	0	0.07147	0	0.154586	m	Hg4-H20-C24-I8-N8-O2	0	0	equal_bothsteps	equal	0	Success at all eik	This sg doesnt have any
1097	ROSKOB_FSR	0	0	0	0	-0.0322	0	0	0	0	-0.02787	0	0	-0.0348	-0.06336	0.13663	0	0	0	0.154575	mm2	Zn4-H24-C36-N16-O8	0	0	equal_bothsteps	equal	0	Success at all eik	This sg doesnt have any
1228	SENTOW_FSR	0	0	0	-0.05676	0	-0.07238	-0.09215	0.07713	-0.0713	0	-0.06294	0	0	0	0	-0.08635	0	-0.04761	0.153251	2	Cu2-H18-C10-S2-N2-O12	0	2	notequal_bothsteps	equal	0	Success at all eik	This sg doesnt have any
1213	OFIXOR_FSR	0	0	0	0	0.01646	0	0	0	0	0.10299	0	0	0.01204	0.08079	-0.12934	0	0	0	0.152973	mm2	Zn4-H28-C40-N4-O12	0	0	equal_bothsteps	equal	0	Success at all eik	This sg doesnt have any
1240	SAWVIV_FSR	0	0	0	0.01084	0	0.06354	0.12807	0.07418	-0.02274	0	-0.0292	0	0	0	0	0.01728	0	0.03819	0.152559	2	Cu2-H18-C26-N2-Cl2	0	0	equal_bothsteps	equal	0	Success at all eik	This sg doesnt have any
1080	GUQNAI_FSR	0	0	0	0.11082	0	0	0	0	0	0	0.15185	0	0	0	0	0	0	0.14094	0.15185	222	Zn4-H16-C16-S16-N24	0	0	equal_bothsteps	equal	0	Success at all eik	This sg doesnt have any
657	ODEWEA_FSR	0	0	0	-0.03121	0	0.10927	0.08889	-0.00371	0.04406	0	-0.08106	0	0	0	0	0.08851	0	-0.06811	0.15133	2	C18-H20-N2-O4-Pb1	0	0	equal_bothsteps	equal	0	Success at all eik	This sg doesnt have any
914	INEFIR_FSR	0	0	0	0.07453	0	0.05163	0.00839	-0.01033	0.01056	0	0.04381	0	0	0	0	0.09617	0	0.07349	0.15119	2	C30-Cd1-H38-N4-O6	0	0	equal_bothsteps	equal	0	Success at all eik	This sg doesnt have any
671	SNMAZH_FSR	0	0	0	0	0.02424	0	0	0	0	-0.04447	0	0	0.09107	-0.00465	-0.11917	0	0	0	0.150056	mm2	Sn4-H16-C16-O20	0	0	equal_bothsteps	equal	0	Success at all eik	This sg doesnt have any
824	OYEJAE_FSR	0	0	0	-0.12708	0	0	0	0	0	0	-0.13747	0	0	0	0	0	0	-0.14996	0.14996	222	Cd4-H40-C24-S8-N16	0	0	equal_bothsteps	equal	0	Success at all eik	This sg doesnt have any
190	NAVLOO_FSR	0.04779	-0.07926	-0.04785	4e-05	0.03904	0.0007	0.00036	-0.0004	0.00038	0.03017	0.0002	-0.0475	0.03325	0.04216	-0.13088	0.00086	-0.03989	0.00025	0.149897	m	C26-Cu2-H24-N4-O12-P4	0	2	notequal_bothsteps	notequal	2	Success at all eik	This sg doesnt have any
198	EPIYOT_FSR	0	0	0	0.04466	0	0.02516	0.05785	-0.05977	0.02801	0	0.12146	0	0	0	0	-0.06503	0	0.093	0.149854	2	Cu2-H14-C24-N12-O4	0	0	equal_bothsteps	equal	0	Success at all eik	This sg doesnt have any
946	FITDUK_FSR	0	0	0	-0.01862	0	0.03452	0.10774	-0.09398	0.01029	0	-0.04368	0	0	0	0	-0.00761	0	-0.02368	0.149847	2	Zn2-H34-C30-N10-O12	0	0	equal_bothsteps	equal	0	Success at all eik	This sg doesnt have any
335	VIHTEL01_FSR	0	0	0	-0.14982	0	0	0	0	0	0	-0.14979	0	0	0	0	0	0	-0.10597	0.14982	-42m	C16-Co2-H12-N8-O4	6	6	equal_bothsteps	equal	6	Success at all eik	Success at all eik
474	NIGRIH_FSR	0	0	0	-0.037	0	0.03339	0.08844	-0.09355	0.07185	0	-0.01793	0	0	0	0	0.06458	0	-0.03391	0.148516	2	Li2-H12-C20-N2-O8	0	0	equal_bothsteps	equal	0	Success at all eik	This sg doesnt have any
1458	GUSCUU_FSR	0	0	0	0.02524	0	0	0	0	0	0	-0.1485	0	0	0	0	0	0	0.1225	0.1485	222	Cu4-H32-C40-N8-O12	0	1	notequal_bothsteps	equal	0	Success at all eik	This sg doesnt have any
153	DOCGAG_FSR	-0.01418	0.01418	0	0.00523	0.03757	-0.0619	-0.0619	0.0619	0	0.03757	-0.00523	0.01418	0.03422	0.03422	-0.14039	0	0	0	0.148497	3	Sr3-H33-C33-N3-O18	0	0	equal_bothsteps	equal	0	Success at all eik	Success at all eik
63	FAPWAX_FSR	-0.02355	0.022	-0.05735	0	0.04115	0	0	0	0	0.0155	0	0.00712	0.03494	-0.02373	0.10574	0	-0.0555	0	0.148139	m	B2-C8-H2-K2-N6-O4	0	0	equal_bothsteps	equal	0	Success at all eik	This sg doesnt have any
352	EQOBUH_FSR	0	0	0	0	0.01229	0	0	0	0	-0.0966	0	0	0.04335	-0.1206	0.07415	0	0	0	0.14806	mm2	C24-Co4-H24-N16	12	12	equal_bothsteps	equal	12	Success at all eik	This sg doesnt have any
1423	QANLIA_FSR	-9e-05	-3e-05	3e-05	0.03701	0	0.10203	0.03505	-0.12944	-0.05136	9e-05	-0.03604	2e-05	-0.00012	7e-05	-9e-05	-0.00192	-2e-05	0.01059	0.148054	2	C12-Cu1-H14-N4-O5	1	1	equal_bothsteps	equal	1	Success at all eik	This sg doesnt have any
399	IJUTAK_FSR	0	0	0	0	0.05043	0	0	0	0	0.00401	0	0	0.09779	0.07422	0.08215	0	0	0	0.147716	mm2	Fe4-H36-C28-N4-O28	0	0	equal_bothsteps	equal	0	Success at all eik	This sg doesnt have any
1227	OREMUU_FSR	-0.02249	0.04577	-0.04322	0	-0.02957	0	0	0	0	0.03014	0	0.02352	0.00275	0.10472	0.09988	0	-0.02783	0	0.147707	m	C12-Cl2-Cu2-H8-N4	0	0	equal_bothsteps	equal	0	Success at all eik	This sg doesnt have any
321	LIKREE_FSR	0	0	0	-0.04958	0	0.1136	0.1045	0.02991	-0.0871	0	-0.04794	0	0	0	0	-0.07178	0	-0.03461	0.147308	2	Ba1-C12-H18-N8-O10	0	0	equal_bothsteps	equal	0	Success at all eik	This sg doesnt have any
767	YEPFEF_FSR	0	0	0	-0.06254	0	0.05193	0.11648	-0.07562	-0.04315	0	-0.02063	0	0	0	0	-0.05088	0	-0.06036	0.146879	2	C30-Cd2-H26-N6-O12	0	0	equal_bothsteps	equal	0	Success at all eik	This sg doesnt have any
133	RUGJAG_FSR	0	0	0	-0.08238	0	0.04525	-0.07441	-0.08388	0.08519	0	0.04005	0	0	0	0	-0.06999	0	0.07877	0.146404	2	C5-H9-N2-O8-Yb1	0	0	equal_bothsteps	equal	0	Success at all eik	This sg doesnt have any
985	QOXFOY_FSR	0.07942	-0.08184	-0.00074	-0.01182	-0.02493	0.03491	0.04149	0.06017	-0.06779	0.01931	-0.01825	-0.08561	-0.02137	0.01304	0.00758	-0.04791	-0.00462	-0.01966	0.145792	1	Zn2-P4-H24-C18-O8	0	0	equal_bothsteps	equal	0	This sg doesnt have any	This sg doesnt have any
962	RATDAS01_FSR	0	0	0	-0.08448	0	-0.02014	0.00151	0.10637	-0.0926	0	-0.03568	0	0	0	0	-0.07548	0	-0.02577	0.145481	2	Zn12-H24-C24-O48	0	0	equal_bothsteps	equal	0	Success at all eik	This sg doesnt have any
1014	YIWDEO_FSR	0	0	0	-0.00187	0	0.03515	0.03387	0.01438	-0.07334	0	0.00907	0	0	0	0	-0.12075	0	0.07821	0.145403	2	Zn2-H28-C28-N4-O10	0	0	equal_bothsteps	equal	0	Success at all eik	This sg doesnt have any
84	EMAQUG_FSR	0	0	0	0.00363	0	-0.03091	-0.02884	0.13035	-0.04901	0	0.02843	0	0	0	0	-0.05514	0	0.01625	0.145028	2	Li4-Mg2-H40-C22-N4-O22	0	0	equal_bothsteps	equal	0	Success at all eik	This sg doesnt have any
1325	FAPFUX_FSR	0	0	0	-0.01416	0	0.14319	0.06674	-0.03553	0.02591	0	-0.00018	0	0	0	0	0.00145	0	-0.01663	0.144853	2	Cu2-H54-C44-N2-Cl4-O4	0	2	notequal_bothsteps	equal	0	Success at all eik	This sg doesnt have any
126	RUGNUE_FSR	0	0	0	0.08599	0	-0.04868	0.07174	0.08348	-0.0865	0	-0.03564	0	0	0	0	0.06908	0	-0.07433	0.144458	2	C5-H9-N2-O8-Y1	0	0	equal_bothsteps	equal	0	Success at all eik	This sg doesnt have any
515	HEFXIZ_FSR	0	0	0	-0.00141	0	0.07302	0.05958	-0.10887	0.04896	0	-0.05514	0	0	0	0	0.05532	0	0.0123	0.144361	2	Li2-H14-C8-N4-O6	0	0	equal_bothsteps	equal	0	Success at all eik	This sg doesnt have any
1281	SAWVER_FSR	0	0	0	-0.00072	0	-0.01537	-0.04491	0.12578	-0.03932	0	0.03809	0	0	0	0	-0.03233	0	-0.00076	0.144341	2	Cu2-H14-C14-Br2-N2	0	0	equal_bothsteps	equal	0	Success at all eik	This sg doesnt have any
370	ACOVEU_FSR	0	0	0	0.02459	0	0	0	0	0	0	0.14397	0	0	0	0	0	0	0.02985	0.14397	222	C8-Co2-H8-O12	6	6	equal_bothsteps	equal	6	Success at all eik	This sg doesnt have any
748	RIFTOQ_FSR	0	0	0	0.11117	0	-0.00154	-0.07452	0.0923	0.0183	0	0.07796	0	0	0	0	0.03351	0	0.0496	0.143126	2	Cd2-H26-C22-S2-N2-O14	0	0	equal_bothsteps	equal	0	Success at all eik	This sg doesnt have any
183	VEQZAV_FSR	-0.09865	0.0746	-0.059	0	-0.02858	0	0	0	0	-0.00618	0	0.06848	-0.02126	0.02445	0.02142	0	-0.0344	0	0.142638	m	C36-Cl2-Cu2-H34-N4-O6	0	2	notequal_bothsteps	equal	0	Success at all eik	This sg doesnt have any
910	ATIDOY_FSR	0	0	0	0.14256	0	0	0	0	0	0	0.08606	0	0	0	0	0	0	0.11042	0.14256	222	C44-Cd1-H32-N8-O8-S2	0	0	equal_bothsteps	equal	0	Success at all eik	This sg doesnt have any
68	GERKOF_FSR	0.09932	-0.09932	0	-0.0175	0.01111	-0.001	-0.001	0.001	0	0.01111	0.0175	-0.09932	0.00789	0.00789	0.02171	0	0	0	0.141988	3	Hg3-Te3-H45-C33-S6-N3	0	0	equal_bothsteps	equal	0	Success at all eik	Success at all eik
965	AQOROP_FSR	-0.1039	0.07756	-0.0122	0	0.04937	0	0	0	0	-0.04971	0	0.07392	0.03441	0.00209	-0.00977	0	-0.00308	0	0.14153	m	Zn2-H12-C24-N8-O4	0	0	equal_bothsteps	equal	0	Success at all eik	This sg doesnt have any
30	XEYSAY_FSR	0	0	0	0	-0.02178	0	0	0	0	0.09737	0	0	-0.02059	0.12247	-0.06765	0	0	0	0.141419	mm2	Co2-P4-H24-C26-O14	6	6	equal_bothsteps	equal	6	Success at all eik	This sg doesnt have any
228	GIRQAB_FSR	0	0	0	0	0.03574	0	0	0	0	0.08756	0	0	-0.02509	0.12085	-0.06872	0	0	0	0.141268	mm2	C40-H32-Hg8-I16-N8-S4	0	0	equal_bothsteps	equal	0	Success at all eik	This sg doesnt have any
557	BOHGOU_FSR	-0.04999	0.08523	0.09663	0	0.00846	0	0	0	0	-0.00031	0	0.08036	-0.02281	0.01309	-0.054	0	0.06463	0	0.140226	m	C8-H12-Mn2-O12	10	10	equal_bothsteps	equal	10	Success at all eik	This sg doesnt have any
503	FENSUN_FSR	0	0	0	0.06741	0	0.06753	0.11223	-0.02431	-0.04629	0	0.06432	0	0	0	0	-0.05571	0	0.03959	0.139522	2	Mn2-H8-C10-N4-O10	10	10	equal_bothsteps	equal	10	Success at all eik	This sg doesnt have any
468	IJECUV_FSR	-0.01064	0.01704	0.00083	0.07417	0.00096	-0.07877	-0.01937	0.04065	-0.0207	0.00576	0.08077	0.0202	-0.0201	0.01929	0.01816	-0.00695	-0.00867	0.09736	0.138968	1	Li2-H16-C10-N2-O8	0	0	equal_bothsteps	equal	0	This sg doesnt have any	This sg doesnt have any
18	HAYPEC_FSR	-0.00446	0.04957	-0.01129	0	0.06921	0	0	0	0	0.03813	0	0.11574	0.0459	0.03484	0.0117	0	-0.1117	0	0.138956	m	Bi2-C20-H26-N4-O16	0	0	equal_bothsteps	equal	0	Success at all eik	This sg doesnt have any
1009	HEMRUP_FSR	0	0	0	-0.04003	0	-0.07868	-0.09637	0.08468	-0.00832	0	-0.05054	0	0	0	0	0.01292	0	-0.03651	0.138135	2	C40-Cl4-H34-N6-O8-S2-Zn2	0	0	equal_bothsteps	equal	0	Success at all eik	This sg doesnt have any
1039	LUGLUU_FSR	0.0285	-0.08481	0.04346	0	-0.04647	0	0	0	0	0.09098	0	-0.10379	-0.04935	0.0473	0.01333	0	0.03208	0	0.138021	m	Zn4-H16-C24-N20-Cl4	0	0	equal_bothsteps	equal	0	Success at all eik	This sg doesnt have any
447	UNIROZ_FSR	0	0	0	0.02546	0	0.04916	0.11278	-0.0526	-0.05849	0	0.00471	0	0	0	0	-0.04383	0	-0.01621	0.137584	2	Li2-H10-C8-O12	0	0	equal_bothsteps	equal	0	Success at all eik	This sg doesnt have any
45	XIDCET_FSR	0	0	0	0	-0.02296	0	0	0	0	0.06419	0	0	-0.07815	0.09092	0.06695	0	0	0	0.137318	mm2	C28-Cs2-H16-N4-P2-S4	0	0	equal_bothsteps	equal	0	Success at all eik	This sg doesnt have any
56	MUHNOT01_FSR	0.12449	0.04375	-0.0072	0	-0.02371	0	0	0	0	-0.00342	0	0.0063	-0.02458	-0.01198	-0.00512	0	0.00695	0	0.137086	2/m	C14-F2-Fe1-H8-N6-Pd1	0	0	equal_bothsteps	equal	0	Centro as per csd	Centro as per csd
1019	DAVKAO_FSR	0	0	0	0	0.03697	0	0	0	0	0.01055	0	0	0.05478	0.03535	-0.11997	0	0	0	0.13654	mm2	C28-H28-N8-O8-S2-Zn2	0	0	equal_bothsteps	equal	0	Success at all eik	This sg doesnt have any
137	OJOBIY01_FSR	0.00822	-0.02098	-0.00873	0.04451	0.10149	0.053	-0.00628	0.00416	-0.00094	0.10884	-0.01608	0.00041	0.0578	-0.00288	0.01818	0.02287	-0.00428	0.04131	0.136506	mm2	C12-H20-Mn2-N4-O10	6	10	notequal_bothsteps	notequal	10	Failed at e36	This sg doesnt have any
611	YIQMOA_FSR	0	0	0	0	-0.06896	0	0	0	0	0.09009	0	0	-0.0972	0.06604	-0.06931	0	0	0	0.136429	mm2	Na4-H24-C24-S8-N4-O20	0	0	equal_bothsteps	equal	0	Success at all eik	This sg doesnt have any
1172	EFUKIA_FSR	0	0	0	0	-0.01811	-0.09557	-0.09557	0.09557	0	-0.0181	0	0	-0.01757	-0.01757	0.10378	0	0	0	0.136363	3m	C9-H6-N12-S4-Zn4	0	0	equal_bothsteps	equal	0	Success at all eik	Success at all eik
64	PELTOQ_FSR	0	0	0	0	0.10538	0	0	0	0	-0.06507	0	0	0.10204	-0.08746	0.02247	0	0	0	0.136258	mm2	C32-H28-In4-O24	0	0	equal_bothsteps	equal	0	Success at all eik	This sg doesnt have any
287	PACGAE_FSR	-0.01236	0.01577	0.02757	0	0.03403	0	0	0	0	-0.12091	0	0.02405	0.04129	-0.11538	0.04027	0	0.04355	0	0.136161	m	C42-F12-H28-N12-O10-Zn4	0	0	equal_bothsteps	equal	0	Success at all eik	This sg doesnt have any
1292	GOSFUP_FSR	0	0	0	0	0.01477	0	0	0	0	0.0105	0	0	-0.04897	-0.02306	-0.12493	0	0	0	0.136152	mm2	Cu12-H40-C56-N16-Cl12	0	0	equal_bothsteps	equal	0	Success at all eik	This sg doesnt have any
760	CICBOI_FSR	0	0	0	0	-0.07623	0	0	0	0	-0.03961	0	0	-0.0658	-0.0478	0.10919	0	0	0	0.13615	mm2	C20-Cd2-H24-N12-S4	0	0	equal_bothsteps	equal	0	Success at all eik	This sg doesnt have any
1298	KABTEO_FSR	0	0	0	-0.01134	0	-0.13045	-0.0951	-0.03183	0.05922	0	0.00823	0	0	0	0	0.01386	0	-0.03642	0.135632	2	Cu2-H26-C22-N4-O12	0	0	equal_bothsteps	equal	0	Success at all eik	This sg doesnt have any
251	ADODII_FSR	0	0	0	-0.0772	0	-0.07759	-0.04131	0.03189	0.00382	0	-0.07451	0	0	0	0	0.00236	0	-0.09828	0.135481	2	C52-H40-La2-O19	0	0	equal_bothsteps	equal	0	Success at all eik	This sg doesnt have any
1250	SAWWIW_FSR	0	0	0	0	-0.02569	0	0	0	0	-0.06258	0	0	-0.02723	-0.12318	-0.04939	0	0	0	0.135478	mm2	Cu2-H18-C14-N2-Cl2	0	0	equal_bothsteps	equal	0	Success at all eik	This sg doesnt have any
1242	IQUBOM01_FSR	0.09382	-0.0579	0.06704	0	-0.00863	0	0	0	0	0.06753	0	-0.019	-0.0155	0.02453	-0.02813	0	0.02796	0	0.135272	m	C22-Cu2-H30-N10-O2	0	2	notequal_bothsteps	equal	0	Success at all eik	This sg doesnt have any
1249	LOVTAR_FSR	0	0	0	0	0.05361	0	0	0	0	0.06262	0	0	0.06202	0.06608	-0.10034	0	0	0	0.135208	mm2	C18-Cu2-H16-N10-O4-S2	0	0	equal_bothsteps	equal	0	Success at all eik	This sg doesnt have any
239	PEXWAQ01_FSR	0	0	0	0	-0.11012	0.03509	0.03509	-0.03509	0	-0.11012	0	0	-0.04165	-0.04165	0.1214	0	0	0	0.134935	3m	C54-H42-La2-O12	0	0	equal_bothsteps	equal	0	Success at all eik	Success at all eik
374	EQOCIW_FSR	0	0	0	0	0.01788	0	0	0	0	-0.08936	0	0	0.05727	-0.10569	0.06037	0	0	0	0.134517	mm2	C24-Co4-H24-N16	12	12	equal_bothsteps	notequal	6	Success at all eik	This sg doesnt have any
85	PEJFAN_FSR	0	0	0	0	-0.03826	0	0	0	0	-0.1345	0	0	0.03676	-0.09885	-0.06341	0	0	0	0.1345	mm2	C30-H24-N4-O8-Pb2	0	0	equal_bothsteps	equal	0	Success at all eik	This sg doesnt have any
1146	CEHLOT_FSR	0	0	0	0.01835	0	0.05702	0.06552	0.0343	-0.10094	0	0.04911	0	0	0	0	-0.04655	0	0.02959	0.134425	2	C26-H30-N4-O6-Zn1	0	0	equal_bothsteps	equal	0	Success at all eik	This sg doesnt have any
679	SRFORA04_FSR	0	0	0	0.08104	0	0	0	0	0	0	0.0872	0	0	0	0	0	0	0.13382	0.13382	222	Sr4-H8-C8-O16	0	0	equal_bothsteps	equal	0	Success at all eik	This sg doesnt have any
577	VEWJOZ_FSR	-0.07979	-0.02906	0.05705	-0.00248	0.00866	0.00827	-0.01438	-0.04721	0.01603	-0.00209	-0.00703	0.01275	0.05341	-0.01156	0.0025	0.0166	0.11385	-0.00435	0.133591	1	Mn1-H19-C23-N3-O8	5	5	equal_bothsteps	equal	5	This sg doesnt have any	This sg doesnt have any
1271	TELFIC_FSR	-0.00179	-0.01291	0.0743	0	0.01359	0	0	0	0	-0.05142	0	-0.12319	-0.02208	-0.03799	-0.03915	0	0.0346	0	0.133491	m	Cu2-H20-C20-S4-N6-Cl2	0	2	notequal_bothsteps	equal	0	Success at all eik	This sg doesnt have any
1239	WURNOM_FSR	-0.00536	0.00079	0.00378	0	0.1332	0	0	0	0	0.06337	0	0.00615	0.02239	0.08148	0.01087	0	0.00045	0	0.133364	m	Cu2-H28-C28-I2-N4-O4	0	0	equal_bothsteps	equal	0	Success at all eik	This sg doesnt have any
180	XAKYAK_FSR	-0.02771	-0.11459	0.05223	-0.00035	0.02318	8e-05	0.00043	0.00094	0	0.0173	-1e-05	-0.095	-0.02576	0.00729	-0.06819	5e-05	0.07482	-0.00012	0.133146	m	C24-Cu2-H28-N4-O20-P4-V4	0	2	notequal_bothsteps	notequal	2	Success at all eik	This sg doesnt have any
42	FAMHEI_FSR	0	0	0	-0.03873	0	-0.04391	-0.07226	0.08974	-0.0262	0	-0.05936	0	0	0	0	-0.0335	0	-0.03208	0.13223	2	Co2-H18-C10-S2-N2-O12	0	0	equal_bothsteps	equal	0	Success at all eik	This sg doesnt have any
1396	ELUGUO_FSR	-0.10616	-0.06891	-0.02465	0	0.02171	0	0	0	0	-0.03779	0	-0.09584	0.03002	-0.03062	0.03644	0	-0.01197	0	0.132101	m	C40-Cu2-F8-H32-N4-O10	0	2	notequal_bothsteps	equal	0	Success at all eik	This sg doesnt have any
467	NUVCUD_FSR	-0.0912	0.0912	0	0.02775	0	0	0	0	0	0	-0.02775	0.0912	0	0	0	0	0	0	0.131928	32	La3-H6-C12-N9-O15	0	0	equal_bothsteps	equal	0	Success at all eik	Success at all eik
944	EBOMIT_FSR	0	0	0	-0.00931	0	-0.04102	-0.07256	0.034	0.10229	0	0.00884	0	0	0	0	0.12992	0	-0.0209	0.131621	2	Zn2-H22-C22-N2-O10	0	0	equal_bothsteps	equal	0	Success at all eik	This sg doesnt have any
1229	EPOPUW_FSR	0	0	0	-4e-05	0	-0.02849	0.07475	-0.03926	-0.07525	0	-0.0671	0	0	0	0	-0.07009	0	0.0094	0.131506	2	Cu2-H20-C12-N4-O8	0	2	notequal_bothsteps	equal	0	Success at all eik	This sg doesnt have any
1306	YIHWAO_FSR	0	0	0	-0.02813	0	0.00279	0.00617	0.0248	0.04528	0	-0.00058	0	0	0	0	0.12666	0	-0.02051	0.131376	2	C16-Cu2-H16-N2-O10	0	0	equal_bothsteps	equal	0	Success at all eik	This sg doesnt have any
1061	EYUZUU01_FSR	0	0	0	0	0.0142	0	0	0	0	0.1213	0	0	0.01708	0.07999	-0.10265	0	0	0	0.131252	mm2	Zn4-H20-C16-N12-O8	0	0	equal_bothsteps	equal	0	Success at all eik	This sg doesnt have any
170	COHVOM01_FSR	0.03925	0.00999	0.02193	0	-0.04224	0	0	0	0	-0.03761	0	0.02375	-0.03951	-0.05506	0.1087	0	0.02732	0	0.131193	m	Br4-C24-H20-N4-O4-Zn2	0	0	equal_bothsteps	equal	0	Success at all eik	This sg doesnt have any
290	XEJSUC_FSR	0	0	0	0.02541	-0.12864	0	0	0	0	0.12864	0.02541	0	-0.08129	0.08129	0	0	0	0.00597	0.131126	-4	Al1-C28-H16-Li1-N4-O4	0	0	equal_bothsteps	equal	0	Success at all eik	Success at all eik
1223	CUNFEX_FSR	0	0	0	0.06452	0	0.00542	0.0218	-0.01417	-0.04405	0	0.02101	0	0	0	0	-0.11405	0	0.00013	0.13106	2	C24-Cu2-H18-I2-N4-O3	0	0	equal_bothsteps	equal	0	Success at all eik	This sg doesnt have any
1092	HEDNOT_FSR	0	0	0	0	-0.09022	0	0	0	0	0.11447	0	0	-0.06473	0.03612	0.10763	0	0	0	0.130686	mm2	Zn4-H24-C14-O14	0	0	equal_bothsteps	equal	0	Success at all eik	This sg doesnt have any
41	KUZHAQ_FSR	0.00997	-0.02538	0.02327	-0.02614	-0.00333	0.0379	0.04898	-0.10946	0.00213	-0.0136	-0.03201	-0.02866	-0.00645	-0.00956	0.02042	-0.01076	0.0137	-0.03203	0.130631	1	Cs2-H20-C10-Cl2-O10	0	0	equal_bothsteps	equal	0	This sg doesnt have any	This sg doesnt have any
1134	XEDPON_FSR	0	0	0	-0.05606	0.0727	0	0	0	0	-0.0727	-0.05606	0	0.08167	-0.08167	0	0	0	-0.06093	0.130585	-4	C28-H24-N16-O8-Zn4	0	0	equal_bothsteps	equal	0	Success at all eik	Success at all eik
1279	WAWRES01_FSR	-0.00014	-0.00027	-0.00024	-0.01143	0.00051	-0.05824	-0.03767	-0.08013	0.09117	3e-05	0.02946	-0.00025	0.00022	0.00016	-0.00016	0.02868	1e-05	-0.04584	0.13046	2	C14-Cu2-H24-N4-O6	0	2	notequal_bothsteps	equal	0	Success at all eik	This sg doesnt have any
1156	EMOTOQ_FSR	0.00029	-0.02038	-0.00622	-0.00499	-0.06629	-0.06106	-0.06944	0.02176	0.08581	-0.0064	-0.00287	-0.05019	-0.04586	-0.01227	0.01665	0.04407	-0.00386	0.0054	0.130332	1	Zn1-H16-C11-N2-O6	0	0	equal_bothsteps	equal	0	This sg doesnt have any	This sg doesnt have any
96	BUTXOE_FSR	-0.05525	0.00683	0.07345	0	0.0075	0	0	0	0	-0.00398	0	0.0384	-0.02079	0.01314	0.07797	0	0.06059	0	0.130105	m	C20-H12-Hg4-N8-O8	0	0	equal_bothsteps	equal	0	Success at all eik	This sg doesnt have any
252	YUMCER_FSR	0	0	0	0	0.02167	0	0	0	0	0.11358	0	0	-0.00391	0.09922	-0.0836	0	0	0	0.129803	mm2	H36-Pb4-C60-N4-O24	0	0	equal_bothsteps	equal	0	Success at all eik	This sg doesnt have any
976	NISWUI_FSR	-0.1078	0.01801	0.03149	0	0.03285	0	0	0	0	-0.02588	0	0.02114	0.04968	-0.0401	-0.01268	0	0.02803	0	0.129101	m	Zn2-H28-C32-Cl4-O14	0	0	equal_bothsteps	equal	0	Success at all eik	This sg doesnt have any
860	CDLGLU10_FSR	0	0	0	-0.07934	0	0	0	0	0	0	-0.12905	0	0	0	0	0	0	-0.11337	0.12905	222	Cd4-H36-C20-N4-O20	0	0	equal_bothsteps	equal	0	Success at all eik	This sg doesnt have any
1115	RUVYIR_FSR	0	0	0	0	-0.05196	0	0	0	0	0.1289	0	0	-0.05799	0.00759	0.02198	0	0	0	0.1289	mm2	C44-H32-N4-O12-Zn2	0	0	equal_bothsteps	equal	0	Success at all eik	This sg doesnt have any
470	BOVPUZ_FSR	0	0	0	0.11055	0	0.02396	0.02455	-0.04081	-0.03646	0	0.11102	0	0	0	0	0.01274	0	0.10913	0.128347	2	Li2-H10-C14-N4-O14	0	0	equal_bothsteps	equal	0	Success at all eik	This sg doesnt have any
8	IWETAF01_FSR	0	0	0	-0.00792	0	-0.12684	-0.04756	0.02264	-0.0158	0	0.02091	0	0	0	0	0.00789	0	0.01383	0.127891	2	Ca2-H20-C8-O16	0	0	equal_bothsteps	equal	0	Success at all eik	This sg doesnt have any
927	LAMPOG_FSR	0	0	0	0.0108	0	0.04652	-0.06213	0.05868	0.03588	0	0.08798	0	0	0	0	0.06995	0	0.07297	0.127794	2	C16-Cd1-H16-O10-S1	0	0	equal_bothsteps	equal	0	Success at all eik	This sg doesnt have any
1129	QIXWAX_FSR	0	0	0	-0.12223	0	0.00274	0.02726	-0.02297	0.02199	0	-0.10705	0	0	0	0	0.0113	0	-0.11791	0.127491	2	Zn2-H10-C6-N8-Cl2-O6	0	0	equal_bothsteps	equal	0	Success at all eik	This sg doesnt have any
840	FIRXIP_FSR	0	0	0	0.04835	0	-0.04325	-0.03976	-0.07148	0.08883	0	-0.0166	0	0	0	0	0.11693	0	0.0314	0.12727	2	Cd2-H20-C8-O18	0	0	equal_bothsteps	equal	0	Success at all eik	This sg doesnt have any
128	EGEQAJ_FSR	0	0	0	0.02486	0	0.0019	0.01922	0.09866	-0.07593	0	-0.01228	0	0	0	0	-0.03862	0	0.05176	0.126568	2	Sn2-P4-H28-C12-N4-O12	0	0	equal_bothsteps	equal	0	Success at all eik	This sg doesnt have any
1263	MISQUB_FSR	-0.0812	-0.0567	-0.07659	0	0.01403	0	0	0	0	0.02837	0	-0.01997	0.01055	0.02336	-0.04685	0	-0.0154	0	0.126417	m	C12-Cu2-H16-N4-O14	2	2	equal_bothsteps	equal	2	Success at all eik	This sg doesnt have any
1442	HAWBOY_FSR	0.0277	-0.02429	-0.03489	-0.00037	-0.04538	0.00185	-0.04182	-0.04372	0.01216	0.02917	-0.04339	0.00077	-0.04037	0.02652	0.02683	0.01345	-0.08921	-0.04	0.126211	1	Cu1-H18-C16-N4-O4	1	1	equal_bothsteps	equal	1	This sg doesnt have any	This sg doesnt have any
1382	BEHBIZ_FSR	0	0	0	0	-0.04354	0	0	0	0	0.01397	0	0	-0.08563	-0.03099	-0.08736	0	0	0	0.126193	mm2	Cu4-H12-C24-N8-Cl4-O16	4	4	equal_bothsteps	equal	4	Success at all eik	This sg doesnt have any
427	GUJTUB_FSR	0	0	0	0	-0.02972	0	0	0	0	0.02529	0	0	-0.00671	0.04071	-0.11918	0	0	0	0.12612	mm2	Hg4-H48-C24-N16	0	0	equal_bothsteps	equal	0	Success at all eik	This sg doesnt have any
1315	VIJGUS_FSR	0	0	0	-0.01289	0	0	0	0	0	0	-0.07427	0	0	0	0	0	0	-0.12598	0.12598	222	Cu4-H16-C16-O24	4	4	equal_bothsteps	equal	4	Success at all eik	This sg doesnt have any
404	SEJTAD_FSR	0	0	0	-0.01104	0	0	0	0	0	0	-0.12584	0	0	0	0	0	0	-0.01151	0.12584	222	Fe4-H24-C16-O24	16	16	equal_bothsteps	notequal	8	Success at all eik	This sg doesnt have any
480	GIFGAG_FSR	0.05935	-0.07365	0.05317	0	0.00518	0	0	0	0	-0.01206	0	-0.04594	0.02557	-0.04258	0.04036	0	0.00777	0	0.125753	m	Mn2-H32-C24-N8-O12	10	10	equal_bothsteps	equal	10	Success at all eik	This sg doesnt have any
246	ODOWAF_FSR	-0.06514	0.00682	0.082	0	-0.02575	0	0	0	0	0.06264	0	0.02654	0.0032	0.06478	-0.05512	0	0.04056	0	0.125672	m	B2-C44-H48-Li2-O16	0	0	equal_bothsteps	equal	0	Success at all eik	This sg doesnt have any
1421	DEJGOP_FSR	0	0	0	-0.07173	0	-0.04377	-0.0456	-0.09906	-0.05621	0	-0.02705	0	0	0	0	-0.04125	0	0.01082	0.125632	2	Cu4-H24-C40-S2-N16	0	0	equal_bothsteps	equal	0	Success at all eik	This sg doesnt have any
990	ECIHIK_FSR	0	0	0	-0.12509	0	0	0	0	0	0	-0.10404	0	0	0	0	0	0	-0.11897	0.12509	222	Zn2-H24-C16-N20-O8	0	0	equal_bothsteps	equal	0	Success at all eik	This sg doesnt have any
1373	SAWWAO_FSR	0	0	0	0	-0.04082	0	0	0	0	-0.06882	0	0	-0.01773	-0.11886	-0.03432	0	0	0	0.12498	mm2	Cu4-H36-C40-Br4-N4	0	0	equal_bothsteps	equal	0	Success at all eik	This sg doesnt have any
1402	NUKNEN_FSR	0	0	0	-0.113	0	0.05224	-0.01964	0.05583	0.00229	0	-0.02806	0	0	0	0	-0.02527	0	-0.0612	0.124533	2	Cu4-H24-C36-O20	0	0	equal_bothsteps	equal	0	Success at all eik	This sg doesnt have any
509	IXUXAC_FSR	0	0	0	0	0.07201	0	0	0	0	-0.08853	0	0	0.03518	-0.11529	0.02951	0	0	0	0.124098	mm2	C24-H16-Li8-N8-O16	0	0	equal_bothsteps	equal	0	Success at all eik	This sg doesnt have any
148	XASVET_FSR	0	0	0	0.06724	0	0.02873	0.02895	0.08832	-0.0438	0	0.06856	0	0	0	0	-0.04706	0	0.03922	0.123521	2	Tl4-H8-C16-O8	0	0	equal_bothsteps	equal	0	Success at all eik	This sg doesnt have any
1066	QOGJIF_FSR	0	0	0	0	-0.02086	0	0	0	0	-0.03622	0	0	-0.0564	-0.04944	0.0981	0	0	0	0.123486	mm2	Zn4-H24-C32-O20	0	0	equal_bothsteps	equal	0	Success at all eik	This sg doesnt have any
475	DOTWAL_FSR	0.08715	-0.08715	0	0	0	0	0	0	0	0	0	-0.08715	0	0	0	0	0	0	0.123249	-6m2	La4-H36-C24-O36	0	0	equal_bothsteps	equal	0	Success at all eik	Success at all eik
995	SAZVAR_FSR	0	0	0	0.05995	0	-0.05454	-0.0878	0.07326	0.01781	0	0.04154	0	0	0	0	0.01271	0	0.03558	0.122958	2	Zn2-H40-C32-N8-O8	0	0	equal_bothsteps	equal	0	Success at all eik	This sg doesnt have any
658	INOJIG_FSR	0	0	0	0.12293	0	0	0	0	0	0	-0.12293	0	0	0	0	0	0	0	0.12293	622	Rb2-Ni2-H6-C6-O12	4	4	equal_bothsteps	equal	4	Success at all eik	Success at all eik
1068	FELXEA_FSR	0	0	0	-0.09826	0	0	0	0	0	0	-0.12287	0	0	0	0	0	0	-0.07451	0.12287	222	Zn4-H48-C24-S8-N16-O16	0	0	equal_bothsteps	equal	0	Success at all eik	This sg doesnt have any
739	FIGHEJ_FSR	0	0	0	0.03435	0	-0.02338	-0.03739	-0.09705	0.05575	0	0.03213	0	0	0	0	0.04509	0	0.05199	0.122299	2	Cd2-H16-C24-I4-N8-O2	0	0	equal_bothsteps	equal	0	Success at all eik	This sg doesnt have any
963	ROCZEP_FSR	-0.02079	-0.02986	0.02825	0	0.04002	0	0	0	0	-0.10568	0	-0.03684	0.06104	-0.08233	0.04615	0	0.03211	0	0.12222	m	C36-H36-N8-O10-Zn2	0	0	equal_bothsteps	equal	0	Success at all eik	This sg doesnt have any
268	PORBUU_FSR	0	0	0	-0.05625	0	-0.00753	-0.00435	-0.00897	0.01995	0	-0.10607	0	0	0	0	-0.00374	0	-0.12131	0.121815	2	Zn4-Sn4-H64-C24-Se14-N12	0	0	equal_bothsteps	equal	0	Success at all eik	This sg doesnt have any
358	YOZSAJ_FSR	0	0	0	0.10402	0	0	0	0	0	0	0.12181	0	0	0	0	0	0	-0.0372	0.12181	222	Co4-H16-C24-N8-O16	12	2	notequal_bothsteps	equal	12	Success at all eik	This sg doesnt have any
815	AFAVUA_FSR	0	0	0	0	-0.08035	0	0	0	0	-0.04953	0	0	-0.05979	-0.07613	0.07379	0	0	0	0.121719	mm2	Cd4-H36-C16-N4-O24	0	0	equal_bothsteps	equal	0	Success at all eik	This sg doesnt have any
1372	DEGJUW_FSR	-0.02235	0.05213	-0.03136	0	0.06262	0	0	0	0	-0.04476	0	-0.03278	0.05675	0.06667	-0.07131	0	-0.02065	0	0.121196	m	C12-Cu4-H10-I4-N10	0	0	equal_bothsteps	equal	0	Success at all eik	This sg doesnt have any
245	QIJNUU_FSR	-0.03172	0.03109	-0.01692	0.01448	0.07784	-0.01773	-0.01145	0.05399	-0.04206	-0.06458	0.01078	-0.03162	0.0461	-0.02427	-0.02013	-0.02914	-0.04227	0.00471	0.120695	1	Na4-H40-C32-S2-O24	0	0	equal_bothsteps	equal	0	This sg doesnt have any	This sg doesnt have any
979	BUSHUU_FSR	0	0	0	-0.08886	0	-0.01768	-0.03852	0.01966	0.01847	0	-0.11097	0	0	0	0	0.00877	0	-0.10898	0.120523	2	Zn2-H22-C20-N2-O14	0	0	equal_bothsteps	equal	0	Success at all eik	This sg doesnt have any
1444	KEVXEQ_FSR	0	0	0	0.06311	0	-0.00754	-0.05723	-0.01321	0.05405	0	0.0555	0	0	0	0	0.05166	0	0.10619	0.120508	2	Cu4-H8-C2-O10	0	4	notequal_bothsteps	equal	0	Success at all eik	This sg doesnt have any
746	RITDIJ_FSR	0	0	0	0	-0.0246	0	0	0	0	0.0762	0	0	-0.02986	0.10206	-0.05641	0	0	0	0.120374	mm2	C28-Cd2-H28-N8-O8	0	0	equal_bothsteps	equal	0	Success at all eik	This sg doesnt have any
1141	MUYGOE_FSR	0	0	0	0.0294	0	0.03698	0.03532	-0.09774	0.05079	0	0.0323	0	0	0	0	-0.0071	0	0.02568	0.120098	2	C22-H26-N4-O6-Zn1	0	0	equal_bothsteps	equal	0	Success at all eik	This sg doesnt have any
941	UNAJIC_FSR	-0.05842	0.08387	0.05037	-0.01656	0.00676	0.00846	-0.02538	-0.01866	0.00713	-0.02437	-0.01444	0.08687	0.01631	-0.02652	0.01338	-0.02118	0.03925	-0.02176	0.119841	1	Zn2-H32-C36-N4-Cl4-O4	0	0	equal_bothsteps	equal	0	This sg doesnt have any	This sg doesnt have any
801	GEDKUX_FSR	0	0	0	0	0.0827	0	0	0	0	-0.06799	0	0	0.10185	-0.06166	0.01203	0	0	0	0.119667	mm2	C40-Cd2-H32-N12-O8	0	0	equal_bothsteps	equal	0	Success at all eik	This sg doesnt have any
568	GELVEZ02_FSR	-0.00977	0.00977	0	0.11884	0	0	0	0	0	0	-0.11696	0.00977	0	0	0	0	0	-0.00021	0.119641	32	Mn3-H12-C21-O15	0	3	notequal_bothsteps	notequal	5	Success at all eik	Success at all eik
9	IXUWUV_FSR	-0.02064	-0.04615	0.0384	0	-0.01724	0	0	0	0	0.04367	0	-0.03383	-0.00975	0.06513	-0.07883	0	0.01101	0	0.119608	m	Ba2-C16-H18-N6-O10	0	0	equal_bothsteps	equal	0	Success at all eik	This sg doesnt have any
1430	IWIVIV02_FSR	0	0	0	-0.11958	0	0	0	0	0	0	-0.06553	0	0	0	0	0	0	-0.09985	0.11958	222	Cu4-H4-C8-N16-O8	0	0	equal_bothsteps	equal	0	Success at all eik	This sg doesnt have any
966	QENFAR_FSR	0	0	0	-0.01379	0	-0.04467	-0.07609	0.08482	0.01471	0	-0.02977	0	0	0	0	0.00936	0	-0.02532	0.118688	2	Zn2-H36-C28-N4-O16	0	0	equal_bothsteps	equal	0	Success at all eik	This sg doesnt have any
1	RAHKAO_FSR	0	0	0	0.01225	0	-0.01829	-0.06985	0.08574	-0.00856	0	0.04197	0	0	0	0	0.01851	0	0.03448	0.118596	2	Sb2-H22-C18-N2-O4-F6	0	0	equal_bothsteps	equal	0	Success at all eik	This sg doesnt have any
778	CIJNEP_FSR	0	0	0	0.01515	0	-0.05984	-0.06429	0.09937	-0.007	0	0.00227	0	0	0	0	-0.00448	0	0.01105	0.118582	2	Cd2-H42-C32-N14-O10	0	0	equal_bothsteps	equal	0	Success at all eik	This sg doesnt have any
48	QEVMOW01_FSR	0	0	0	0.02321	0	-0.02564	-0.00803	-0.04232	0.02099	0	0.00489	0	0	0	0	0.01912	0	0.11489	0.118542	2	C8-H4-K1-Li1-O12-Sb2	0	0	equal_bothsteps	equal	0	Success at all eik	This sg doesnt have any
1222	HORWEQ_FSR	0	0	0	0	0.00684	0	0	0	0	0.00689	0	0	0.03691	0.03691	-0.10626	0	0	0	0.118389	6mm	Cu12-H18-C18-Br12-N18	0	0	equal_bothsteps	equal	0	Success at all eik	Success at all eik
498	NEZQAN_FSR	0.07602	-0.07602	0	-0.04642	-0.01018	0.00991	0.00991	-0.00991	0	-0.01018	0.04642	-0.07602	-0.00216	-0.00216	0.02475	0	0	0	0.118376	3	Li6-H36-C27-O15	0	0	equal_bothsteps	equal	0	Success at all eik	Success at all eik
589	CISLIB_FSR	0.0865	-0.01131	-0.07723	0	-0.01713	0	0	0	0	-0.00262	0	-0.00209	-0.02092	0.00797	0.00324	0	-0.07549	0	0.118164	m	C2-H6-N1-Na3-O10-S2	0	0	equal_bothsteps	equal	0	Success at all eik	This sg doesnt have any
1253	GOGCAH_FSR	-0.07514	-0.06941	-0.05888	0	0.00243	-1e-05	-1e-05	-1e-05	-1e-05	0.03275	1e-05	-0.00214	0.01721	0.02998	-0.05546	0	-0.01359	0	0.118062	m	C14-Cu2-H18-N2-O14	2	2	equal_bothsteps	notequal	0	Success at all eik	This sg doesnt have any
1311	IMZCUC01_FSR	0	0	0	0	0.01419	0	0	0	0	0.11795	0	0	0.00049	0.00702	-0.06949	0	0	0	0.11795	mm2	Cu2-H22-C18-N12-Cl2	2	2	equal_bothsteps	equal	2	Success at all eik	This sg doesnt have any
1063	FELXIE_FSR	0	0	0	-0.09816	0	0	0	0	0	0	-0.1179	0	0	0	0	0	0	-0.08572	0.1179	222	Zn4-H48-C28-S8-N16-O16	0	0	equal_bothsteps	equal	0	Success at all eik	This sg doesnt have any
197	LOVTEV_FSR	0	0	0	0.00147	0	-0.01665	0.02009	-0.11575	-0.00663	0	0.00309	0	0	0	0	-0.00141	0	0.00619	0.117708	2	Cu2-H6-C10-S2-Br2-N6	0	0	equal_bothsteps	equal	0	Success at all eik	This sg doesnt have any
360	COMALT01_FSR	0	0	0	-0.05433	0	-0.02393	-0.05025	-0.0092	0.10596	0	0.00224	0	0	0	0	0.03805	0	0.00194	0.117653	2	Co2-H16-C8-O14	6	6	equal_bothsteps	equal	6	Success at all eik	This sg doesnt have any
848	NOBMAT_FSR	0	0	0	-0.1115	0	0	0	0	0	0	-0.11752	0	0	0	0	0	0	-0.06183	0.11752	222	Cd4-H16-C24-S12-N8-O16	0	0	equal_bothsteps	equal	0	Success at all eik	This sg doesnt have any
853	BELXUN_FSR	0	0	0	0	-0.10345	0	0	0	0	0.0566	0	0	-0.08939	0.07143	-0.0265	0	0	0	0.117452	mm2	C32-Cd4-H24-N16-O8	0	0	equal_bothsteps	equal	0	Success at all eik	This sg doesnt have any
136	ZIXCOA_FSR	0	0	0	-0.04386	0	0.04854	0.03674	-0.08318	0.06495	0	-0.03601	0	0	0	0	0.03655	0	-0.02302	0.117405	2	Sr2-H36-C20-O24	0	0	equal_bothsteps	equal	0	Success at all eik	This sg doesnt have any
978	KEYPAG_FSR	0.07368	-0.02803	-0.04054	0	0.03473	0	0	0	0	0.02876	0	-0.02522	0.0447	0.01598	-0.07375	0	-0.02242	0	0.117068	m	C36-H28-N4-O10-Zn2	0	0	equal_bothsteps	equal	0	Success at all eik	This sg doesnt have any
954	HEBNAF_FSR	0.09244	-0.03012	-0.04988	0	-0.01712	0	0	0	0	0.02974	0	-0.03419	-0.03288	0.06969	-0.04504	0	-0.05372	0	0.116758	m	C36-H24-N12-O8-Zn2	0	0	equal_bothsteps	equal	0	Success at all eik	This sg doesnt have any
1280	KEQTEF_FSR	0	0	0	0	0.02303	0	0	0	0	-0.02261	0	0	0.02419	-0.08753	-0.07331	0	0	0	0.116709	mm2	Cu2-H16-C16-O12	2	2	equal_bothsteps	equal	2	Success at all eik	This sg doesnt have any
1270	TABFIO_FSR	0	0	0	0	-0.01236	0	0	0	0	0.01681	0	0	-0.08277	0.06314	-0.05267	0	0	0	0.116669	mm2	C20-Cu2-H20-N20-O12	2	2	equal_bothsteps	equal	2	Success at all eik	This sg doesnt have any
799	NUYWEK_FSR	-0.06266	0.04174	-0.0042	0.01626	0.01223	-0.03613	-0.04946	-0.02236	0.07379	0.03063	0.03078	0.05127	0.02695	0.02411	-0.04282	0.03494	0.01877	0.02735	0.116488	1	Cd2-H28-C40-N8-O8	0	0	equal_bothsteps	equal	0	This sg doesnt have any	This sg doesnt have any
953	NEMJOF01_FSR	0	0	0	0	0.11647	0	0	0	0	0.06675	0	0	0.04479	-0.02025	0.0123	0	0	0	0.11647	mm2	C22-Cl4-H20-N8-O2-Zn2	0	0	equal_bothsteps	equal	0	Success at all eik	This sg doesnt have any
1351	KAYPEF_FSR	0	0	0	0	-0.11643	0	0	0	0	0.0605	0	0	-0.10861	0.01792	0.01174	0	0	0	0.11643	mm2	Cu4-H40-C24-N12-Cl4-O8	4	4	equal_bothsteps	equal	4	Success at all eik	This sg doesnt have any
886	FIJNOC_FSR	0.01259	-0.03606	0.02439	0	0.00145	0	0	0	0	-0.06107	0	-0.03945	-0.02021	-0.06229	0.08481	0	0.02383	0	0.116244	m	C48-Cd4-H40-N24-O32	0	0	equal_bothsteps	equal	0	Success at all eik	This sg doesnt have any
715	CUGSON_FSR	0	0	0	0.11622	0	0	0	0	0	0	-0.00716	0	0	0	0	0	0	0.06769	0.11622	222	C8-H8-O12-Sr2	0	0	equal_bothsteps	equal	0	Success at all eik	This sg doesnt have any
744	BADBUF_FSR	-0.0458	0.01667	0.0304	0	0.02581	0	0	0	0	-0.06102	0	0.04658	0.0209	-0.06025	0.08388	0	0.04556	0	0.11621	m	Br2-C36-Cd2-H30-N24	0	0	equal_bothsteps	equal	0	Success at all eik	This sg doesnt have any
288	CUGROM_FSR	0	0	0	0.11615	0	0	0	0	0	0	-0.01778	0	0	0	0	0	0	0.07144	0.11615	222	C8-Ca2-H8-O12	0	0	equal_bothsteps	equal	0	Success at all eik	This sg doesnt have any
1074	CUMBAO_FSR	0	0	0	0	0.08374	0	0	0	0	0.0583	0	0	0.05997	0.07583	-0.06426	0	0	0	0.116086	mm2	Zn4-H36-C16-N4-O24	0	0	equal_bothsteps	equal	0	Success at all eik	This sg doesnt have any
192	IHEPES_FSR	-0.0841	0.02904	0.04318	0	-0.06011	0	0	0	0	0.00515	0	0.05571	-0.04788	-0.00862	-0.0659	0	0.01884	0	0.11576	m	C12-Cl4-Cu2-F4-H24-N4-O4	2	2	equal_bothsteps	equal	2	Success at all eik	This sg doesnt have any
1290	FAKQEN02_FSR	-0.01791	-0.03236	0.09876	0	-0.01031	0	0	0	0	0.01091	0	-0.03094	0.00624	0.02437	-0.02047	0	0.07611	0	0.115509	m	C20-Cu2-H28-N4-O14-S2	0	2	notequal_bothsteps	equal	0	Success at all eik	This sg doesnt have any
166	EXERIJ_FSR	0	0	0	0.06648	0	-0.04782	-0.06573	0.02138	0.03105	0	0.0869	0	0	0	0	0.05774	0	0.07963	0.115296	2	Zn2-As2-H32-C36-N6-O10	0	0	equal_bothsteps	equal	0	Success at all eik	This sg doesnt have any
363	ODIZOQ01_FSR	5e-05	0.05338	0.02068	0	0.01546	0	0	0	0	0.0212	0	0.03502	0.03879	0.09348	-0.00214	0	0.01561	0	0.115134	m	C32-Co2-H24-N4-O8	6	6	equal_bothsteps	equal	6	Success at all eik	This sg doesnt have any
708	VENDAU_FSR	0	0	0	0	0.02224	0	0	0	0	0.01654	0	0	0.01317	0.01371	-0.11324	0	0	0	0.114825	mm2	Sn4-H52-C24-S4-N12	0	0	equal_bothsteps	equal	0	Success at all eik	This sg doesnt have any
1045	HUHGUN_FSR	0.07138	-0.02407	-0.04864	0	-0.01113	0	0	0	0	-0.02775	0	-0.02978	-0.01292	-0.04837	0.07764	0	-0.05393	0	0.114737	m	Zn4-H16-C16-N32	0	0	equal_bothsteps	equal	0	Success at all eik	This sg doesnt have any
885	LAGTEU_FSR	0	0	0	0.1127	0	0	0	0	0	0	0.11472	0	0	0	0	0	0	0.09676	0.11472	222	Cd4-H40-C44-N8-O20	0	0	equal_bothsteps	equal	0	Success at all eik	This sg doesnt have any
1256	BAGPOP01_FSR	0.0941	-0.04593	0.04389	-5e-05	0.00427	0.00016	-0.00011	-0.00028	-0.00019	0.00609	2e-05	0.01248	0.01838	0.03176	0.02069	3e-05	0.04386	-0.00013	0.114487	m	C28-Cu2-H16-N16	2	2	equal_bothsteps	notequal	0	Success at all eik	This sg doesnt have any
1269	KUBCIU_FSR	0.07767	-0.07298	0.02404	0	0.02719	0	0	0	0	0.02603	0	0.00191	0.04335	0.03665	0.01112	0	0.03289	0	0.114339	m	C20-Cu2-H14-N10-S4	2	2	equal_bothsteps	equal	2	Success at all eik	This sg doesnt have any
182	MUSHAJ_FSR	0.00779	0.01182	0.02895	0	-0.07304	0	0	0	0	-0.08102	0	-0.00104	-0.09473	-0.01811	-0.0245	0	0.0301	0	0.114202	m	Br2-C24-Cu2-H16-N4	0	0	equal_bothsteps	equal	0	Success at all eik	This sg doesnt have any
1161	VUWXUJ01_FSR	-0.00152	0.00152	0	-0.00124	-0.0544	0.00749	0.00749	-0.00749	0	-0.0544	0.00124	0.00152	-0.05293	-0.05293	0.08577	0	0	0	0.113841	3	C42-H42-N18-O18-Zn6	0	0	equal_bothsteps	equal	0	Success at all eik	Success at all eik
838	QAFFOV_FSR	0	0	0	0	-0.03114	0	0	0	0	0.11355	0	0	-0.01327	0.08199	-0.01144	0	0	0	0.11355	mm2	Cd4-H24-C36-N12-Cl4-O8	0	0	equal_bothsteps	equal	0	Success at all eik	This sg doesnt have any
805	ACOHAE_FSR	0.00583	0.01383	-0.04647	0	-0.03973	0	0	0	0	-0.00529	0	0.02196	-0.04878	-0.02057	0.08779	0	-0.03399	0	0.113509	m	C40-Cd2-H36-N8-O10	0	0	equal_bothsteps	equal	0	Success at all eik	This sg doesnt have any
888	BOYFUS_FSR	0	0	0	0	-0.05017	0	0	0	0	-0.00457	0	0	-0.03196	0.0407	0.101	0	0	0	0.113485	mm2	C40-Cd4-H20-N12-O16	0	0	equal_bothsteps	equal	0	Success at all eik	This sg doesnt have any
971	FITDAQ_FSR	0	0	0	-0.00288	0	-0.03942	-0.06897	0.08857	-0.00172	0	0.0148	0	0	0	0	0.0028	0	0.00164	0.113241	2	Zn2-H26-C20-N10-O8	0	0	equal_bothsteps	equal	0	Success at all eik	This sg doesnt have any
1287	BARPAO_FSR	0.06636	-0.04922	0.06825	0	-0.00762	0	0	0	0	0.06282	0	-0.00386	-0.01385	0.0173	-0.02457	0	0.03214	0	0.113216	m	C22-Cl2-Cu2-H28-N10-O2	0	2	notequal_bothsteps	equal	0	Success at all eik	This sg doesnt have any
524	DULVEM_FSR	0.0145	-0.0398	0.02757	0	-0.01581	0	0	0	0	-0.02057	0	-0.06837	-0.01699	-0.04001	0.07549	0	0.06827	0	0.113139	m	C18-H16-Mg2-N4-O12	0	0	equal_bothsteps	equal	0	Success at all eik	This sg doesnt have any
135	YITMAQ01_FSR	-0.06904	-0.04669	0.05797	0.00416	-0.03832	0.01611	0.03823	-0.00674	0.02662	-0.0413	-0.00604	-0.03265	-0.02574	-0.03555	-0.00788	-0.00662	0.02878	0.01203	0.113045	1	Sn1-H21-C13-N1-F2	0	0	equal_bothsteps	equal	0	This sg doesnt have any	This sg doesnt have any
1157	ESATEY_FSR	0	0	0	0	-0.08112	0	0	0	0	-0.00286	0	0	-0.04163	0.00509	0.10454	0	0	0	0.112639	mm2	C68-H48-N8-O20-Zn4	0	0	equal_bothsteps	equal	0	Success at all eik	This sg doesnt have any
1209	VUWXUJ06_FSR	-0.00149	0.00149	0	-0.00112	0.05408	-0.00631	-0.00631	0.00631	0	0.05408	0.00111	0.00149	0.05252	0.05252	-0.08465	0	0	0	0.112616	3	C42-H42-N18-O18-Zn6	0	0	equal_bothsteps	equal	0	Success at all eik	Success at all eik
472	IFIVIF01_FSR	0	0	0	0.0472	0	-0.08819	-0.07706	0.01801	0.04866	0	0.06359	0	0	0	0	0.05499	0	0.04589	0.112579	2	Li2-H32-C26-N2-O10	0	0	equal_bothsteps	equal	0	Success at all eik	This sg doesnt have any
32	MAFBAX_FSR	0	0	0	-0.07152	0	-0.01214	-0.01101	0.01448	-0.06597	0	-0.08908	0	0	0	0	-0.01691	0	-0.04151	0.112331	2	Cr4-Ni2-H32-C24-N8-O14	0	0	equal_bothsteps	equal	0	Success at all eik	This sg doesnt have any
618	EVAHAM_FSR	0	0	0	0.06983	0	0	0	0	0	0	0.11194	0	0	0	0	0	0	0.09903	0.11194	222	Na4-H40-C36-S4-N8-O20-F12	0	0	equal_bothsteps	equal	0	Success at all eik	This sg doesnt have any
1336	XEBNEX_FSR	0	0	0	-0.04025	0	0	0	0	0	0	-0.11194	0	0	0	0	0	0	-0.01043	0.11194	222	Cu4-H40-C20-I4-N8	0	0	equal_bothsteps	equal	0	Success at all eik	This sg doesnt have any
806	JOMVIQ_FSR	0	0	0	0	-0.07907	0	0	0	0	0.01679	0	0	0.04755	0.04092	-0.09253	0	0	0	0.111791	mm2	C56-Cd2-H40-N4-O8	0	0	equal_bothsteps	equal	0	Success at all eik	This sg doesnt have any
982	FIPWOS_FSR	0	0	0	-0.02279	0	-0.0179	-0.05624	0.07393	-0.02417	0	-0.05706	0	0	0	0	-0.03725	0	-0.02878	0.111663	2	Zn2-H24-C18-N8-O6	0	0	equal_bothsteps	equal	0	Success at all eik	This sg doesnt have any
765	NIYBOP_FSR	0	0	0	0.08972	0	-0.00187	-0.05082	-0.01931	0.0022	0	0.09746	0	0	0	0	0.01479	0	0.08759	0.111619	2	Cd2-H10-C22-N2-O8	0	0	equal_bothsteps	equal	0	Success at all eik	This sg doesnt have any
367	AMUDUJ_FSR	0	0	0	-0.01111	0	-0.01915	-0.01427	0.005	-0.08608	0	-0.00994	0	0	0	0	-0.1098	0	-0.01432	0.11157	2	C32-Cl2-Co2-H26-O14	6	6	equal_bothsteps	equal	6	Success at all eik	This sg doesnt have any
359	INOKAZ_FSR	0	0	0	0.11152	0	0	0	0	0	0	-0.11152	0	0	0	0	0	0	0	0.11152	622	Cs2-Ni2-H6-C6-O12	4	4	equal_bothsteps	equal	4	Success at all eik	Success at all eik
1043	USUBUG_FSR	0.08693	-0.05867	-0.02118	0	0.02808	0	0	0	0	0.0147	0	-0.07403	0.02205	0.01518	-0.0371	0	-0.01462	0	0.11149	m	C4-H8-N20-Zn2	0	0	equal_bothsteps	equal	0	Success at all eik	This sg doesnt have any
1136	QEYZAY02_FSR	0	0	0	0.00743	0	-0.07067	-0.06033	0.08742	-0.00971	0	0.03148	0	0	0	0	0.03044	0	0.02784	0.111208	2	C22-H26-N4-O8-Zn1	0	0	equal_bothsteps	equal	0	Success at all eik	This sg doesnt have any
442	EDAKIE_FSR	-0.05398	-0.02186	0.07763	0	-0.04647	0	0	0	0	0.05934	0	0.00655	-0.02997	0.02328	-0.01395	0	0.05386	0	0.111182	m	C8-H14-K2-O12	0	0	equal_bothsteps	equal	0	Success at all eik	This sg doesnt have any
1401	ASUQIO04_FSR	0	0	0	0	0.0376	0	0	0	0	-0.0344	0	0	0.04142	-0.10295	-0.00522	0	0	0	0.111093	mm2	C24-Cu6-H36-N18	0	0	equal_bothsteps	equal	0	Success at all eik	This sg doesnt have any
1090	QIKXEN_FSR	0	0	0	-0.09505	0	0	0	0	0	0	-0.11078	0	0	0	0	0	0	-0.06651	0.11078	222	Zn4-H48-C28-S8-N16-O16	0	0	equal_bothsteps	equal	0	Success at all eik	This sg doesnt have any
1185	FIPXEJ_FSR	0	0	0	-0.03964	0	-0.01244	-0.00239	-0.07071	0.07333	0	-0.0434	0	0	0	0	0.03328	0	-0.0281	0.110754	2	Zn4-H48-C36-N16-O12	0	0	equal_bothsteps	equal	0	Success at all eik	This sg doesnt have any
1111	ALIMAL_FSR	0.08283	-0.02281	-0.05699	0	-0.03307	0	0	0	0	0.03185	0	-0.00465	-0.03504	0.04774	-0.0092	0	-0.05036	0	0.110691	m	C46-H36-N4-O16-Zn2	0	0	equal_bothsteps	equal	0	Success at all eik	This sg doesnt have any
1303	KASRUS_FSR	0	0	0	-0.00297	0	-0.01086	-0.01876	-0.01021	0.02719	0	0.01122	0	0	0	0	-0.11042	0	0.00218	0.110476	2	Cu2-H12-C12-N8-Cl4	0	0	equal_bothsteps	equal	0	Success at all eik	This sg doesnt have any
60	FAFDEX_FSR	0.00885	0.02527	-0.00434	0.007	0.05209	-0.03583	-0.05428	0.06206	-0.00751	-0.01646	-0.01219	0.02944	0.06573	-0.00683	-0.06717	0.00828	-0.01258	-0.00011	0.110309	1	K1-Mn1-H16-C12-I3-O15	5	5	equal_bothsteps	equal	5	This sg doesnt have any	This sg doesnt have any
1225	FABJID_FSR	-0.02621	-0.00405	0.01593	0	-0.01584	0	0	0	0	0.06204	0	-0.02487	-0.10328	-0.00162	0.02309	0	-0.00532	0	0.110213	m	Cu2-H16-C24-N4-Cl2-O8	0	0	equal_bothsteps	equal	0	Success at all eik	This sg doesnt have any
959	GEDLOS_FSR	-0.01485	0.08595	-0.05763	0	-0.02731	0	0	0	0	-0.00156	0	0.06559	-0.02678	-0.00191	0.00104	0	-0.06096	0	0.110069	m	C40-H32-N12-O8-Zn2	0	0	equal_bothsteps	equal	0	Success at all eik	This sg doesnt have any
924	LALYOO_FSR	0	0	0	0	0.00746	0.07764	0.07764	-0.07764	0	0.00748	0	0	0.01794	0.01794	-0.04925	0	0	0	0.110054	3m	C42-Cd6-Cl6-H36-N6-O12-S6	0	0	equal_bothsteps	equal	0	Success at all eik	Success at all eik
151	JIPLEA_FSR	0	0	0	0	0.04725	0	0	0	0	0.02217	0	0	0.04098	-0.07011	0.07422	0	0	0	0.110015	mm2	C12-H18-O12-Yb2	0	0	equal_bothsteps	equal	0	Success at all eik	This sg doesnt have any
92	EXOKOS_FSR	0	0	0	0.05021	0	-0.08209	-0.04303	-0.0542	0.02757	0	0.01735	0	0	0	0	-0.05689	0	0.02408	0.109931	2	C18-H20-O8-P2-Pb1	0	0	equal_bothsteps	equal	0	Success at all eik	This sg doesnt have any
1387	GIWKON_FSR	0	0	0	0.01194	0	0.08629	0.04725	0.05163	-0.06402	0	0.01837	0	0	0	0	-0.03956	0	-0.05909	0.109708	2	Cu4-H14-C18-S4-N14	0	0	equal_bothsteps	equal	0	Success at all eik	This sg doesnt have any
511	XUNTEH_FSR	0	0	0	0	0.00249	0	0	0	0	0.04228	0	0	0.01045	0.06311	-0.08909	0	0	0	0.109677	mm2	Li4-H16-C24-N4-O8	0	0	equal_bothsteps	equal	0	Success at all eik	This sg doesnt have any
543	MNGLUD_FSR	0.07055	0.02072	0.01214	-0.04467	0.03551	-0.05089	-0.01175	-0.02664	-0.00897	-0.0019	-0.00753	-0.01128	0.0005	0.02182	0.02932	0.00493	0.0115	-0.01964	0.10933	1	Mn1-H26-C12-O16	1	1	equal_bothsteps	notequal	5	This sg doesnt have any	This sg doesnt have any
1117	CICJEE_FSR	0	0	0	0	0.01786	0	0	0	0	-0.02038	0	0	0.0258	0.01869	-0.10425	0	0	0	0.109009	mm2	C52-H48-N8-O24-S4-Zn2	0	0	equal_bothsteps	equal	0	Success at all eik	This sg doesnt have any
753	TUBMIO_FSR	0.07714	-0.00057	-0.05526	0	0.04954	0	0	0	0	0.02541	0	0.02784	0.02709	0.00081	0.00527	0	0.0069	0	0.108962	m	Cd2-H20-C24-I4-N8-O2	0	0	equal_bothsteps	equal	0	Success at all eik	This sg doesnt have any
142	DAWSEB_FSR	0	0	0	-0.01818	0	0.10265	0.03342	-0.01691	0.02861	0	-0.03771	0	0	0	0	-0.04843	0	-0.03636	0.108905	2	Mn2-H16-C18-O12	10	10	equal_bothsteps	equal	10	Success at all eik	This sg doesnt have any
222	KAZQAG_FSR	0.06471	-0.05777	-0.00414	0	-0.06502	0	0	0	0	-0.00868	0	-0.01741	-0.01629	-0.02792	-0.03393	0	0.00227	0	0.108633	m	C48-Co2-H44-K2-N4-O6	0	0	equal_bothsteps	equal	0	Success at all eik	This sg doesnt have any
1024	FIXGAV_FSR	-0.06558	0.03821	0.01574	0	0.04725	0	0	0	0	-0.05216	0	0.04448	0.05644	-0.05079	0.04147	0	0.04375	0	0.108623	m	Zn2-H22-C34-N6-O8	0	0	equal_bothsteps	equal	0	Success at all eik	This sg doesnt have any
562	ESUMOU_FSR	0	0	0	-0.09462	0	0	0	0	0	0	-0.0663	0	0	0	0	0	0	-0.10839	0.10839	222	Mn4-H24-C16-O24	20	20	equal_bothsteps	equal	20	Success at all eik	This sg doesnt have any
62	LEKMIA_FSR	-0.03939	0.03939	0	-0.02528	0.01625	-0.04406	-0.04406	0.04406	0	0.01625	0.02528	0.03939	0.02729	0.02729	-0.10124	0	0	0	0.108347	3	C21-H12-In1-O7-P1	0	0	equal_bothsteps	equal	0	Success at all eik	Success at all eik
800	AQANOW01_FSR	-0.01924	-0.01348	0.01337	0	-0.10175	0	0	0	0	0.01495	0	-0.0138	-0.0751	0.02482	0.05873	0	0.00744	0	0.108346	m	Cd2-H40-C44-N8-O12	0	0	equal_bothsteps	equal	0	Success at all eik	This sg doesnt have any
553	KUQNOA_FSR	0.0263	0.04441	-0.08095	0.01285	-0.03124	-0.00259	-0.00221	0.00823	-0.01364	0.00172	-0.00287	0.02572	-0.02993	-0.0034	0.03989	-0.01094	-0.07163	0.01405	0.108297	1	Na2-H40-C24-N8-O19	0	0	equal_bothsteps	equal	0	This sg doesnt have any	This sg doesnt have any
283	DEPHUC01_FSR	0	0	0	0	-0.06346	0	0	0	0	0.06703	0	0	-0.09149	0.05546	-0.01575	0	0	0	0.10814	mm2	Y4-H44-C32-S4-O44	0	0	equal_bothsteps	equal	0	Success at all eik	This sg doesnt have any
140	QUBPUY_FSR	0	0	0	-0.00625	0	0.01456	0.00102	-0.10226	-0.0178	0	-0.02997	0	0	0	0	-0.01053	0	-0.04781	0.108043	2	Tl2-B2-H26-C42-S12-N6	0	0	equal_bothsteps	equal	0	Success at all eik	This sg doesnt have any
928	WITSIE_FSR	0	0	0	-0.00558	0	0.02984	0.00745	0.08216	-0.06872	0	-0.01097	0	0	0	0	-0.07814	0	0.0056	0.107928	2	C18-Cd1-H12-N14	0	0	equal_bothsteps	equal	0	Success at all eik	This sg doesnt have any
351	SOWTIJ_FSR	0	0	0	0	-0.06166	0	0	0	0	0.01456	0	0	0.08094	0.04093	-0.05845	0	0	0	0.107903	mm2	Co4-H12-C28-N4-O16	12	12	equal_bothsteps	equal	12	Success at all eik	This sg doesnt have any
227	ONIHUQ_FSR	0	0	0	0	-0.10788	0	0	0	0	0.05942	0	0	-0.05578	0.04791	-0.01451	0	0	0	0.10788	mm2	Hg4-H44-C64-I8-Br4-N8	0	0	equal_bothsteps	equal	0	Success at all eik	This sg doesnt have any
565	UBUQAM_FSR	0	0	0	0.00262	0	0.10768	0.07889	0.02091	-0.05291	0	-0.00493	0	0	0	0	-0.01409	0	0.00404	0.107776	2	Na2-H20-C10-Cl2-O10	0	0	equal_bothsteps	equal	0	Success at all eik	This sg doesnt have any
737	NEYRIV_FSR	0	0	0	0.01394	0	0.00548	0.00205	-0.08409	0.0668	0	0.00862	0	0	0	0	0.0598	0	0.00994	0.107758	2	Cd2-H20-C24-N8-O14	0	0	equal_bothsteps	equal	0	Success at all eik	This sg doesnt have any
660	UGAFIR01_FSR	0	0	0	-0.04565	0	-0.03531	-0.04964	0.02596	0.092	0	-0.00157	0	0	0	0	0.0361	0	0.00182	0.107724	2	Ni2-H16-C8-O14	4	4	equal_bothsteps	equal	4	Success at all eik	This sg doesnt have any
1326	LESZEP_FSR	0.00339	0.00932	-0.08305	0	-0.01314	0	0	0	0	0.07593	0	0.01639	-0.02361	0.04861	-0.03558	0	-0.05945	0	0.107531	m	Cu4-H18-C28-S2-N10	0	0	equal_bothsteps	equal	0	Success at all eik	This sg doesnt have any
1378	DOZQUF_FSR	0	0	0	0.08224	0	0	0	0	0	0	0.10753	0	0	0	0	0	0	0.07889	0.10753	222	Cu4-H28-C12-S4-N4-O24	0	4	notequal_bothsteps	equal	0	Success at all eik	This sg doesnt have any
285	LIQBAP_FSR	0	0	0	-0.00786	0	-0.02717	0.00121	-0.09179	0.05512	0	0.00883	0	0	0	0	0.04104	0	0.00774	0.107439	2	C40-Cl2-H50-N4-O12-S2-Zn2	0	0	equal_bothsteps	equal	0	Success at all eik	This sg doesnt have any
1032	GOGHAM_FSR	0	0	0	-0.01846	0	-0.04768	-0.04479	0.01128	0.0848	0	-0.01062	0	0	0	0	0.07601	0	-0.07232	0.107142	2	Zn2-H34-C32-S2-N2-O8	0	0	equal_bothsteps	equal	0	Success at all eik	This sg doesnt have any
654	INICPB01_FSR	-0.05387	0.02434	0.01656	-1e-05	-0.02971	1e-05	-1e-05	-9e-05	0.00012	0.00905	5e-05	0.01844	-0.04913	-0.00833	0.06712	-4e-05	-0.03636	1e-05	0.107072	m	C24-H20-N4-O10-Pb2	0	0	equal_bothsteps	equal	0	Success at all eik	This sg doesnt have any
1217	MUCKIF_FSR	0	0	0	-0.00932	0	0.03441	0.04213	-0.08752	0.04492	0	-0.00216	0	0	0	0	0.00994	0	-0.01253	0.107038	2	Zn4-P4-H64-C40-N4-Cl8-O12	0	0	equal_bothsteps	equal	0	Success at all eik	This sg doesnt have any
238	ONINOQ_FSR	0	0	0	0	0.10702	0	0	0	0	-0.05766	0	0	0.0517	-0.04643	0.01693	0	0	0	0.10702	mm2	Hg4-H44-C64-I8-N8-Cl4	0	0	equal_bothsteps	equal	0	Success at all eik	This sg doesnt have any
449	QEVNEN_FSR	0	0	0	-0.00197	0	0	0	0	0	0	-0.02532	0	0	0	0	0	0	-0.10654	0.10654	222	K2-Li2-Sb4-H8-C16-O24	0	0	equal_bothsteps	equal	0	Success at all eik	This sg doesnt have any
794	RIHMIG_FSR	0	0	0	0	-0.08411	0	0	0	0	-0.03156	0	0	-0.05618	-0.04003	0.08117	0	0	0	0.106523	mm2	C34-Cd2-H40-N8-O12-S2	0	0	equal_bothsteps	equal	0	Success at all eik	This sg doesnt have any
381	NEYBEZ_FSR	0	0	0	0.06154	0	0	0	0	0	0	0.10643	0	0	0	0	0	0	0.10176	0.10643	222	C24-Co4-H12-N4-O8-S4	8	2	notequal_bothsteps	notequal	12	Success at all eik	This sg doesnt have any
992	FITCUJ_FSR	0	0	0	-0.02036	0	0.0203	0.05385	-0.08599	0.01392	0	-0.02874	0	0	0	0	0.01649	0	-0.01492	0.106367	2	Zn2-H26-C20-N10-O8	0	0	equal_bothsteps	equal	0	Success at all eik	This sg doesnt have any
937	FITDEU_FSR	0	0	0	-0.0338	0	0.03366	0.03813	-0.08834	0.02337	0	-0.03713	0	0	0	0	0.00404	0	-0.0207	0.105748	2	Zn2-H38-C30-N10-O12	0	0	equal_bothsteps	equal	0	Success at all eik	This sg doesnt have any
224	QEBGEM_FSR	0	0	0	0	0.07335	0	0	0	0	0.07784	0	0	0.01333	0.07474	-0.07344	0	0	0	0.105628	mm2	C48-Cd2-H48-N8-O12	0	0	equal_bothsteps	equal	0	Success at all eik	This sg doesnt have any
1432	QILRIO_FSR	0	0	0	-0.02645	0	-0.03393	-0.03771	-0.0251	-0.08797	0	-0.03681	0	0	0	0	-0.08073	0	-0.02509	0.105573	2	Cu4-H20-C8-S2-N16-O12	0	0	equal_bothsteps	equal	0	Success at all eik	This sg doesnt have any
1236	BEJZOF_FSR	-0.07399	0.02586	0.03963	0	0.0275	0	0	0	0	-0.02905	0	0.01814	0.0678	-0.00141	0.07109	0	0.01775	0	0.105452	m	C20-Cl4-Cu2-H16-N4	0	2	notequal_bothsteps	equal	0	Success at all eik	This sg doesnt have any
520	SADRUM_FSR	-0.00208	-0.03353	-0.00362	9e-05	-0.00693	0.0001	0.00014	0.00023	-0.00015	-0.07231	0.00014	-0.01975	-0.02302	-0.0958	-0.01635	-7e-05	0.00156	6e-05	0.105279	m	C18-H22-Mn2-N2-O20	10	10	equal_bothsteps	notequal	0	Success at all eik	This sg doesnt have any
97	VAXVAT_FSR	-0.02361	-0.02485	0.00236	0.04483	-0.02213	-0.01754	-0.01072	-0.04688	0.02201	0.00929	0.04441	-0.06648	-0.00289	-0.02744	0.04016	0.01422	-0.01463	0.06237	0.105169	1	Na1-Mo2-H22-C14-N3-O15	0	0	equal_bothsteps	equal	0	This sg doesnt have any	This sg doesnt have any
441	VAHRON_FSR	-0.0742	0.0742	0	-0.00601	0	0	0	0	0	0	0.00601	0.0742	0	0	0	0	0	0	0.105107	32	C9-H18-La2-O24	0	0	equal_bothsteps	equal	0	Success at all eik	Success at all eik
1053	PIKNIJ_FSR	0	0	0	-0.10462	0	0	0	0	0	0	-0.09777	0	0	0	0	0	0	-0.10112	0.10462	222	Zn4-H12-C20-Br4-N16	0	0	equal_bothsteps	equal	0	Success at all eik	This sg doesnt have any
75	WEHSUZ_FSR	0.0083	0.01631	-0.0406	0	0.00645	0	0	0	0	0.04338	0	0.06312	0.02429	0.03894	-0.07883	0	-0.03115	0	0.104601	m	La4-H20-C36-N12-O28	0	0	equal_bothsteps	equal	0	Success at all eik	This sg doesnt have any
803	ZASJAG_FSR	-0.03153	0.06157	-0.03073	0	-0.02209	0	0	0	0	0.0638	0	0.06599	-0.03225	0.0544	-0.01702	0	-0.02229	0	0.10455	m	C48-Cd2-H28-N4-O8	0	0	equal_bothsteps	equal	0	Success at all eik	This sg doesnt have any
314	KADHAB_FSR	0	0	0	-0.07225	0	0.04891	0.0735	-0.05548	0.01263	0	-0.04775	0	0	0	0	-0.02822	0	-0.08418	0.104498	2	Co2-P4-H24-C28-S2-N4-O12	6	6	equal_bothsteps	equal	6	Success at all eik	This sg doesnt have any
218	LAPJAQ_FSR	0	0	0	-0.04262	0	-0.0713	-0.00418	-0.04208	0.03995	0	-0.08653	0	0	0	0	-0.00783	0	-0.00294	0.104267	2	Cd2-H44-C36-S2-N12-O18	0	0	equal_bothsteps	equal	0	Success at all eik	This sg doesnt have any
584	TAPXIT01_FSR	0	0	0	0	0.10394	0	0	0	0	0.03775	0	0	0.05059	0.03121	-0.07578	0	0	0	0.10394	mm2	C56-H32-Na2-O20-Yb2	0	0	equal_bothsteps	equal	0	Success at all eik	This sg doesnt have any
1020	TAPQUZ_FSR	0	0	0	0.0279	0	0.06401	0.03372	0.03334	-0.04476	0	0.03499	0	0	0	0	-0.02305	0	0.08156	0.103683	2	Zn2-H28-C32-O12	0	0	equal_bothsteps	equal	0	Success at all eik	This sg doesnt have any
315	QUMGAI_FSR	0	0	0	0.10345	0	0	0	0	0	0	0.01081	0	0	0	0	0	0	0.04546	0.10345	222	Ba4-H32-C24-O32	0	0	equal_bothsteps	equal	0	Success at all eik	This sg doesnt have any
942	AWIBOZ_FSR	0	0	0	-0.00785	0	-0.00958	0.00072	-0.00939	-0.05933	0	0.00418	0	0	0	0	-0.10297	0	-0.00458	0.103406	2	C32-Cl2-H26-O14-Zn2	0	0	equal_bothsteps	equal	0	Success at all eik	This sg doesnt have any
1047	CIZMIJ_FSR	0.00689	0.00615	-0.00979	0.00307	0.00642	-0.00485	0.00479	-0.05392	0.05147	-0.04146	-0.00613	0.00983	-0.00114	-0.04925	0.03437	-0.00207	-0.01011	0.00077	0.103252	1	Zn2-H40-C60-N12-O14	0	0	equal_bothsteps	equal	0	This sg doesnt have any	This sg doesnt have any
630	CEHWIX_FSR	0	0	0	0	-0.0174	0	0	0	0	0.0351	0	0	0.03154	0.09672	0.01681	0	0	0	0.103112	mm2	Ni4-H20-C20-N8-Cl4-O12	8	8	equal_bothsteps	notequal	0	Success at all eik	This sg doesnt have any
957	ECIWAO_FSR	0.06101	-0.06266	-0.00576	0	-0.01036	0	0	0	0	0.00202	0	0.00998	0.01933	-0.0524	0.03631	0	0.00939	0	0.103066	m	C32-H24-N4-O8-Zn2	0	0	equal_bothsteps	equal	0	Success at all eik	This sg doesnt have any
234	GAWHAP_FSR	0	0	0	0.00919	0	0.04447	0.04584	0.05211	-0.07575	0	0.00769	0	0	0	0	-0.06135	0	0.0192	0.103024	2	K2-H60-C38-N6-O18	0	0	equal_bothsteps	equal	0	Success at all eik	This sg doesnt have any
731	XUHSOI_FSR	0	0	0	0	0.02817	0	0	0	0	-0.10284	0	0	0.07859	-0.01818	-0.03372	0	0	0	0.10284	mm2	C12-Cd2-H20-N4-O10	0	0	equal_bothsteps	equal	0	Success at all eik	This sg doesnt have any
453	RIZZAB_FSR	-0.04051	0.04877	0.01947	0	-0.01792	0	0	0	0	-0.07436	0	0.06802	0.05323	-0.0468	-0.03563	0	-0.01337	0	0.102794	m	C22-H26-Li2-N8-O2	0	0	equal_bothsteps	equal	0	Success at all eik	This sg doesnt have any
1011	GIFYOL_FSR	0	0	0	-0.00494	0	0.02218	0.03794	-0.05202	0.03706	0	0.01896	0	0	0	0	0.09828	0	-0.02798	0.102779	2	Zn2-H40-C22-N8-Cl4-O4	0	0	equal_bothsteps	equal	0	Success at all eik	This sg doesnt have any
276	LUPZUS_FSR	0	0	0	0.01101	0	-0.06254	-0.06874	0.06399	0.02115	0	0.036	0	0	0	0	0.00646	0	0.04068	0.102778	2	Yb2-H42-C54-O12	0	0	equal_bothsteps	equal	0	Success at all eik	This sg doesnt have any
916	WUVGOL_FSR	0.02974	-0.03983	0.03403	0	0.03697	0	0	0	0	-0.00944	0	-0.0504	0.03805	0.03836	-0.07616	0	0.03672	0	0.102698	m	Cd6-H16-C30-N12-O26	0	0	equal_bothsteps	equal	0	Success at all eik	This sg doesnt have any
88	GIHKEO_FSR	0	0	0	0.02619	0	-0.00944	-0.0534	-0.01984	0.08386	0	0.01583	0	0	0	0	0.07576	0	0.01836	0.102607	2	Br2-C12-H16-N2-Na2-O7-S2	0	0	equal_bothsteps	equal	0	Success at all eik	This sg doesnt have any
104	DORREI_FSR	-0.05566	0.06995	-0.04114	0.00995	0.00879	-0.01165	-0.00521	-0.00491	0.01299	0.00776	0.00075	0.02532	0.00087	0.01553	-0.02877	0.01594	-0.03309	0.01737	0.102545	1	Na2-H24-C12-S2-O17	0	0	equal_bothsteps	equal	0	This sg doesnt have any	This sg doesnt have any
1005	ODIVON01_FSR	0	0	0	-0.09339	0	0	0	0	0	0	-0.10247	0	0	0	0	0	0	-0.04862	0.10247	222	Zn2-H32-C40-N12-O8	0	0	equal_bothsteps	equal	0	Success at all eik	This sg doesnt have any
274	CISJIY01_FSR	0	0	0	0.00971	0	-0.06203	-0.06724	0.06479	0.01854	0	0.03737	0	0	0	0	0.00428	0	0.04213	0.10227	2	Y2-H42-C54-O12	0	0	equal_bothsteps	equal	0	Success at all eik	This sg doesnt have any
22	DECBAQ_FSR	-0.00504	-0.00468	0.04377	0.01164	0.02474	-0.00325	-0.01297	-0.00282	0.04996	0.04935	0.00501	0.02429	0.02256	0.0164	0.05881	-0.00588	0.036	-0.00433	0.102226	1	V8-Co4-H16-C8-N4-O28	2	2	equal_bothsteps	notequal	8	This sg doesnt have any	This sg doesnt have any
1254	NECCUU_FSR	0	0	0	-0.06156	0	0.00177	0.01487	-0.09517	0.01048	0	-0.0325	0	0	0	0	-0.00221	0	-0.04067	0.102198	2	C27-Cu2-H22-N2-P2	0	0	equal_bothsteps	equal	0	Success at all eik	This sg doesnt have any
932	UMORIY_FSR	0	0	0	0	0.01341	0	0	0	0	-0.00754	0	0	0.08156	-0.0165	-0.05914	0	0	0	0.102087	mm2	C8-Cd4-H8-N16-O12	0	0	equal_bothsteps	equal	0	Success at all eik	This sg doesnt have any
646	IFIWIE_FSR	0	0	0	0.04096	0	0	0	0	0	0	0.10202	0	0	0	0	0	0	0.02201	0.10202	222	C8-H8-Ni2-O12	4	4	equal_bothsteps	equal	4	Success at all eik	This sg doesnt have any
949	FITFIA_FSR	0	0	0	0.01217	0	-0.03268	-0.06784	0.06045	0.01424	0	0.0436	0	0	0	0	0.01293	0	0.01246	0.101785	2	Zn2-H26-C20-N10-O8	0	0	equal_bothsteps	equal	0	Success at all eik	This sg doesnt have any
156	XEZZIL_FSR	-0.07418	-0.00883	0.03728	-0.02961	-0.02116	0.0216	0.02941	-0.01741	-0.02021	-0.02898	-0.01167	-0.00445	-0.02716	-0.00784	0.02895	-0.01173	0.03133	-0.01289	0.101476	1	V6-Zn2-H22-C30-N6-O17	0	0	equal_bothsteps	equal	0	This sg doesnt have any	This sg doesnt have any
1238	ADOQOC_FSR	0	0	0	0	0.03383	0	0	0	0	-0.04656	0	0	-0.03701	-0.07139	0.06163	0	0	0	0.101314	mm2	C12-Cu2-H16-N20	2	0	notequal_bothsteps	equal	2	Success at all eik	This sg doesnt have any
865	LOYBEI_FSR	0	0	0	-0.0649	0	-0.0154	-0.00431	0.04317	-0.01647	0	-0.04303	0	0	0	0	-0.04761	0	-0.07063	0.101287	2	Cd4-H48-C48-O24	0	0	equal_bothsteps	equal	0	Success at all eik	This sg doesnt have any
317	POMSIV_FSR	0	0	0	-0.09501	0	0	0	0	0	0	-0.10121	0	0	0	0	0	0	-0.08939	0.10121	222	Ca4-H44-C48-N4-O20	0	0	equal_bothsteps	equal	0	Success at all eik	This sg doesnt have any
365	LIGRAW_FSR	0	0	0	0	-0.05577	0	0	0	0	0.01464	0	0	-0.06399	0.02725	-0.0732	0	0	0	0.100973	mm2	Co4-P4-H40-C36-N4-O20	12	12	equal_bothsteps	notequal	6	Success at all eik	This sg doesnt have any
373	WANXIU_FSR	0	0	0	0.09331	0	0	0	0	0	0	0.10097	0	0	0	0	0	0	0.07182	0.10097	222	Co4-H24-C32-S8-N16	12	12	equal_bothsteps	notequal	0	Success at all eik	This sg doesnt have any
972	ASAYOJ_FSR	0	0	0	0.00358	0	-0.00036	0.00889	0.04775	-0.08817	0	-0.00667	0	0	0	0	-0.0633	0	-0.00518	0.100884	2	C38-H30-N8-O8-Zn2	0	0	equal_bothsteps	equal	0	Success at all eik	This sg doesnt have any
560	IPOYAN_FSR	0	0	0	-0.00983	0	-0.01575	-0.01577	-0.00924	0.04442	0	-0.00609	0	0	0	0	0.08671	0	-0.05143	0.100816	2	Na2-H10-C14-O6	0	0	equal_bothsteps	equal	0	Success at all eik	This sg doesnt have any
835	CIZMOP_FSR	0	0	0	0.03105	0	-0.03346	-0.06249	0.07032	-0.01339	0	0.03364	0	0	0	0	0.01203	0	0.04035	0.100801	2	C60-Cd3-H42-N12-O16	0	0	equal_bothsteps	equal	0	Success at all eik	This sg doesnt have any
163	CUGSUT_FSR	0	0	0	-0.00682	0	-0.03467	-0.04022	0.06932	0.05666	0	0.02273	0	0	0	0	0.05337	0	0.0136	0.100747	2	Sr2-H12-C8-O14	0	0	equal_bothsteps	equal	0	Success at all eik	This sg doesnt have any
464	KEHWAY01_FSR	0	0	0	-0.0973	0	0	0	0	0	0	-0.07453	0	0	0	0	0	0	-0.1004	0.1004	222	K4-P4-H48-C36-N8-O36	0	0	equal_bothsteps	equal	0	Success at all eik	This sg doesnt have any
535	ODOSEI_FSR	0	0	0	0.06158	0	0.02677	-0.00966	0.0521	-0.01811	0	0.08331	0	0	0	0	-0.00423	0	0.0664	0.100381	2	Na2-H26-C12-S2-O18	0	0	equal_bothsteps	equal	0	Success at all eik	This sg doesnt have any
579	INAKIT_FSR	-0.05851	0.00981	-0.00708	0	0.03137	0	0	0	0	0.01122	0	-0.02669	0.06752	0.00061	0.03535	0	-0.01481	0	0.100043	m	C30-H32-N12-Ni2-O8	4	4	equal_bothsteps	equal	4	Success at all eik	This sg doesnt have any
1324	SAWWOC_FSR	0	0	0	0	0.00166	0	0	0	0	-0.04953	0	0	-0.01267	-0.09383	-0.03203	0	0	0	0.0999526	mm2	Cu4-H36-C28-Br4-N4	0	0	equal_bothsteps	equal	0	Success at all eik	This sg doesnt have any
1357	VILKUX_FSR	0	0	0	0	-0.09979	0	0	0	0	0.04388	0	0	-0.06396	0.03098	0.03825	0	0	0	0.09979	mm2	C40-Cl4-Cu2-H32-N8-O16-S8	2	2	equal_bothsteps	equal	2	Success at all eik	This sg doesnt have any
780	HALMOZ_FSR	-0.0761	0.03743	0.01935	0	0.01918	0	0	0	0	-0.04373	0	0.03764	0.03299	-0.0425	0.00031	0	0.03333	0	0.0997266	m	C44-Cd2-H36-N8-O8	0	0	equal_bothsteps	equal	0	Success at all eik	This sg doesnt have any
538	XOHTEU_FSR	-0.01378	-0.02578	0.03932	-0.00838	0.00806	0.01538	0.0164	0.01653	-0.04248	-0.03168	-0.00439	-0.01807	0.01421	-0.05256	0.03375	-0.04529	0.04329	-0.01492	0.0996632	1	Mn1-H22-C28-O12	5	5	equal_bothsteps	equal	5	This sg doesnt have any	This sg doesnt have any
1001	OXUNUR_FSR	0	0	0	0	-0.00174	0	0	0	0	0.08345	0	0	-0.01601	0.07563	-0.06286	0	0	0	0.0996373	mm2	C32-H24-N4-O16-Zn2	0	0	equal_bothsteps	equal	0	Success at all eik	This sg doesnt have any
764	VEVRIZ_FSR	-0.02776	0.04025	-0.03135	0	-0.05382	0	0	0	0	0.03819	0	0.04008	-0.05084	0.02577	-0.01735	0	-0.02719	0	0.099218	m	Cd2-H14-C18-S4-N6-O2	0	0	equal_bothsteps	equal	0	Success at all eik	This sg doesnt have any
1073	INEPIC_FSR	0	0	0	-0.05178	0	0.06224	0.05029	0.00333	0.00672	0	-0.06191	0	0	0	0	0.03674	0	-0.04399	0.0991964	2	Zn4-H34-C30-N14-O18	0	0	equal_bothsteps	equal	0	Success at all eik	This sg doesnt have any
563	ESIQUS_FSR	0	0	0	0.02878	0	-0.01451	-0.02011	0.09599	0.00661	0	0.01201	0	0	0	0	-0.00582	0	0.05176	0.0990274	2	C24-H22-Mn3-N28	15	11	notequal_bothsteps	equal	15	Success at all eik	This sg doesnt have any
1143	KEWXIV_FSR	0	0	0	0	-0.00925	0	0	0	0	-0.08015	0	0	0.02067	0.03856	-0.08883	0	0	0	0.0990197	mm2	Zn4-H36-C48-N24-Cl4-O4	0	0	equal_bothsteps	equal	0	Success at all eik	This sg doesnt have any
383	BECHEY_FSR	0.01247	-0.02598	-0.03126	-0.00409	0.01127	-0.00626	0.00328	0.00233	-0.003	0.00962	-0.00308	0.0184	0.06734	-0.01114	-0.04188	-0.00086	0.04219	-0.01983	0.098893	1	Fe2-H20-C29-N18-O1	0	0	equal_bothsteps	equal	0	This sg doesnt have any	This sg doesnt have any
783	PELTEG_FSR	-0.04865	-0.02705	0.03473	0	-0.00088	0	0	0	0	0.03741	0	-0.05006	0.01955	0.08092	-0.01573	0	-0.00865	0	0.0987006	m	C6-Cd2-H20-N2-O14-P2	0	0	equal_bothsteps	equal	0	Success at all eik	This sg doesnt have any
921	HAZPEF_FSR	0	0	0	-0.05368	0	-0.04108	-0.03263	-0.04004	0.05317	0	-0.0651	0	0	0	0	0.0399	0	-0.07514	0.0986559	2	Br2-C12-Cd1-H6-N2-O4	0	0	equal_bothsteps	equal	0	Success at all eik	This sg doesnt have any
691	MAQVOR_FSR	0.06967	-0.06967	0	-0.00131	0	0	0	0	0	0	0.00131	-0.06967	0	0	0	0	0	0	0.098537	32	C9-H18-O24-Yb2	0	0	equal_bothsteps	equal	0	Success at all eik	Success at all eik
866	WETFEJ_FSR	0	0	0	0	-0.04134	0	0	0	0	-0.09815	0	0	-0.02546	-0.05002	0.03904	0	0	0	0.09815	mm2	C44-Cd4-H28-N16-O8	0	0	equal_bothsteps	equal	0	Success at all eik	This sg doesnt have any
420	ACUFOU_FSR	-0.01721	0.03354	-0.02582	0	-0.02481	0	0	0	0	-0.02905	0	-0.0221	-0.0374	0.06346	-0.03704	0	-0.01753	0	0.098049	m	C20-H14-K2-N8-O16	0	0	equal_bothsteps	equal	0	Success at all eik	This sg doesnt have any
179	TILZUM_FSR	0	0	0	-0.02842	0	-0.01302	-0.05823	0.07233	0.02859	0	-0.01272	0	0	0	0	0.01642	0	-0.04677	0.0979875	2	Cu4-H20-C22-Se2-I4-N4	0	0	equal_bothsteps	equal	0	Success at all eik	This sg doesnt have any
269	EJODIS_FSR	-0.00351	-0.00025	0.0041	0	0.00187	0	0	0	0	-0.02632	0	9e-05	-0.08177	-0.0049	0.05338	0	-0.00281	0	0.097949	m	C72-H44-N16-O12-Rb4	0	0	equal_bothsteps	equal	0	Success at all eik	This sg doesnt have any
463	VESBEC01_FSR	0	0	0	0.00368	-0.09773	0	0	0	0	-0.09773	-0.00368	0	-0.01667	-0.01667	-0.04111	0	0	0	0.0977993	4	La4-H12-C4-S4-O28	0	0	equal_bothsteps	equal	0	Success at all eik	Success at all eik
87	AXAWIH_FSR	0	0	0	-0.02797	0	0.04276	0.05737	-0.0427	-0.06636	0	5e-05	0	0	0	0	-0.0728	0	-0.0031	0.0975616	2	C34-Cl2-H30-Hg1-N6-O4	0	0	equal_bothsteps	equal	0	Success at all eik	This sg doesnt have any
419	LUHTEO_FSR	-0.04084	0.00393	0.0556	0	0.01407	0	0	0	0	0.00491	0	-0.00036	-0.01793	0.0133	0.05935	0	0.03121	0	0.0975054	m	K2-H50-C28-N4-O14	0	0	equal_bothsteps	equal	0	Success at all eik	This sg doesnt have any
14	UYACUT_FSR	0	0	0	0	0.02828	0	0	0	0	-0.08662	0	0	0.06646	-0.03342	-0.0628	0	0	0	0.0973533	mm2	Bi2-C20-H20-N22	0	0	equal_bothsteps	equal	0	Success at all eik	This sg doesnt have any
1425	LOVTOF_FSR	0.00204	-0.00754	0.00474	0	-0.04506	0	0	0	0	-0.02991	0	-0.00431	-0.04486	-0.01505	0.08477	0	-0.00075	0	0.0972315	m	Cu6-H12-C16-S6-N10	0	0	equal_bothsteps	equal	0	Success at all eik	This sg doesnt have any
400	EHIWAU_FSR	-0.07297	0.05796	-0.0062	0.00993	-0.01942	0.01178	0.03872	0.03626	-0.01173	-0.01683	0.0035	0.01656	-0.00205	-0.0195	-0.00602	-0.00674	-0.01974	0.00114	0.0972181	1	Hg2-H19-C20-N7-Cl4-O1	0	0	equal_bothsteps	equal	0	This sg doesnt have any	This sg doesnt have any
969	UNABAN_FSR	0	0	0	0.01751	0	-0.02582	0.03123	-0.08562	0.01563	0	0.0296	0	0	0	0	0.05199	0	0.00815	0.0970904	2	Zn2-H24-C16-S4-N4-O8	0	0	equal_bothsteps	equal	0	Success at all eik	This sg doesnt have any
1181	RAJRUP_FSR	0.06675	-0.05132	-0.01388	0	-0.04443	0	0	0	0	0.03858	0	-0.0538	-0.03412	-0.00439	0.05599	0	-0.05169	0	0.0968246	m	C56-H44-N4-O16-Zn4	0	0	equal_bothsteps	equal	0	Success at all eik	This sg doesnt have any
1362	LADKAF_FSR	0	0	0	0.02812	0	-0.02358	-0.05465	0.05439	0.0411	0	0.04162	0	0	0	0	0.00371	0	0.04971	0.0967798	2	Cu2-H32-C46-N4-O20	0	2	notequal_bothsteps	equal	0	Success at all eik	This sg doesnt have any
171	KIHVOP_FSR	0	0	0	0	0.01467	0	0	0	0	-0.09666	0	0	0.01661	-0.02166	0.01348	0	0	0	0.09666	mm2	Zn4-P4-H36-C24-N8-O12	0	0	equal_bothsteps	equal	0	Success at all eik	This sg doesnt have any
1428	CURGUR_FSR	0	0	0	0	0.05255	0	0	0	0	-0.02048	0	0	0.0672	-0.04436	0.05339	0	0	0	0.0966134	mm2	Cu4-H36-C48-S4-N16-O4	0	0	equal_bothsteps	equal	0	Success at all eik	This sg doesnt have any
943	KOMMII_FSR	-0.00022	0.04361	-0.03788	0	0.01096	0	0	0	0	0.00547	0	0.02608	0.03269	0.0066	-0.07827	0	-0.02406	0	0.0965967	m	Zn2-H60-C32-O8	0	0	equal_bothsteps	equal	0	Success at all eik	This sg doesnt have any
1151	QIKXIR_FSR	0	0	0	-0.09659	0	0	0	0	0	0	-0.08094	0	0	0	0	0	0	-0.06274	0.09659	222	Zn4-H48-C40-S8-N16-O16	0	0	equal_bothsteps	equal	0	Success at all eik	This sg doesnt have any
341	FAZPIH_FSR	0	0	0	-0.09589	0	0	0	0	0	0	-0.05685	0	0	0	0	0	0	-0.06477	0.09589	222	Co4-H16-C24-N16-O8	12	12	equal_bothsteps	notequal	0	Success at all eik	This sg doesnt have any
1343	NEBVIC_FSR	0	0	0	-0.01784	0	0	0	0	0	0	-0.03485	0	0	0	0	0	0	-0.09572	0.09572	222	Cu4-H24-C20-Br4-N8	0	0	equal_bothsteps	equal	0	Success at all eik	This sg doesnt have any
53	CESZIM_FSR	-0.0286	0.01408	-0.00157	0	0.01831	0	0	0	0	-0.06335	0	-0.0168	0.04251	-0.03596	-0.07535	0	-0.00362	0	0.0956492	m	Br2-C12-H6-Hg2-N8-S4	0	0	equal_bothsteps	equal	0	Success at all eik	This sg doesnt have any
1347	HOYMUD02_FSR	0	0	0	0	-0.00653	0	0	0	0	0.09549	0	0	0.00839	0.08826	0.03113	0	0	0	0.09549	mm2	C12-Cu4-H8-N8-S4	0	0	equal_bothsteps	equal	0	Success at all eik	This sg doesnt have any
1339	HEFNUD_FSR	-0.0894	0.02803	0.00606	0	-0.0001	0	0	0	0	0.00117	0	0.00146	-0.01826	-0.00263	0.00786	0	0.00028	0	0.0954519	m	C44-Cu2-H40-N8-O14	2	2	equal_bothsteps	equal	2	Success at all eik	This sg doesnt have any
325	UHUXAW01_FSR	-0.07498	0.04485	-0.00101	0	0.018	0	0	0	0	-0.05372	0	0.03629	0.02725	-0.02524	-0.01022	0	0.01474	0	0.0953708	m	Co2-H24-C28-N8-O8	6	6	equal_bothsteps	notequal	0	Success at all eik	This sg doesnt have any
633	GIJPOF_FSR	0	0	0	0.02591	0	-0.01416	-0.04526	-0.04107	0.07206	0	0.01223	0	0	0	0	0.04534	0	0.01987	0.0952755	2	Sn2-H44-C56-O4	0	0	equal_bothsteps	equal	0	Success at all eik	This sg doesnt have any
883	ROQJIS_FSR	0	0	0	0	-0.09522	0	0	0	0	-0.0791	0	0	0.02317	-0.03916	0.00535	0	0	0	0.09522	mm2	C36-Cd4-H40-N8-O24	0	0	equal_bothsteps	equal	0	Success at all eik	This sg doesnt have any
1338	ODOBAL_FSR	-0.03764	0.06683	0.04247	0	0.0074	0	0	0	0	0.04369	0	0.05127	-0.04711	0.02583	-0.02309	0	0.01664	0	0.0951116	m	Cu2-H24-C32-N4-O8	0	2	notequal_bothsteps	equal	0	Success at all eik	This sg doesnt have any
733	SEBTOJ_FSR	0	0	0	0.05473	0	-0.01086	0.01397	-0.04864	0.07331	0	0.03295	0	0	0	0	0.05278	0	0.06034	0.0949793	2	Cd2-H16-C14-S2-N8-O10	0	0	equal_bothsteps	equal	0	Success at all eik	This sg doesnt have any
689	UFOCID_FSR	0.06706	-0.06706	0	0.00024	0	0	0	0	0	0	-0.00024	-0.06706	0	0	0	0	0	0	0.0948375	32	C9-H18-O24-Y2	0	0	equal_bothsteps	equal	0	Success at all eik	Success at all eik
862	REGLUM_FSR	0	0	0	-0.04046	0	-0.01465	-0.03371	0.01765	0.01482	0	-0.08549	0	0	0	0	0.02064	0	-0.08857	0.0947421	2	Cd4-H20-C16-O26	0	0	equal_bothsteps	equal	0	Success at all eik	This sg doesnt have any
51	QAPCUH_FSR	0.00332	-0.00183	0.04559	0	-0.00205	0	0	0	0	-0.00443	0	-0.01629	0.01155	-0.01957	0.01044	0	0.09072	0	0.0942076	m	Ga2-H22-C16-S2	0	0	equal_bothsteps	equal	0	Success at all eik	This sg doesnt have any
771	JAYVOV_FSR	0	0	0	-0.01545	0	-0.00302	-0.05539	0.0653	-0.00083	0	-0.0389	0	0	0	0	-0.04811	0	0.03753	0.0940534	2	Cd2-H20-C16-S4-N10-Cl2-O4	0	0	equal_bothsteps	equal	0	Success at all eik	This sg doesnt have any
834	AGUTEC_FSR	-0.02601	-0.00674	-0.01422	0	0.04737	0	0	0	0	-0.03277	0	-0.01296	0.07693	-0.03691	-0.03641	0	0.00303	0	0.0939456	m	Br8-C16-Cd2-Cu2-H28-N24-O6	2	2	equal_bothsteps	equal	2	Success at all eik	This sg doesnt have any
233	BAXPOG_FSR	0	0	0	-0.01917	0	-0.03967	0.00189	-0.08704	0.02141	0	-0.02763	0	0	0	0	-0.01192	0	-0.00354	0.0938154	2	Br4-C54-H36-Hg2-N4-O2	0	0	equal_bothsteps	equal	0	Success at all eik	This sg doesnt have any
457	BENHUA_FSR	0	0	0	-0.0938	0	0	0	0	0	0	-0.05426	0	0	0	0	0	0	-0.0826	0.0938	222	K4-H28-C24-N16-O20	0	0	equal_bothsteps	equal	0	Success at all eik	This sg doesnt have any
1252	AGUTEC_FSR	-0.02574	-0.00678	-0.01423	0	0.04741	0	0	0	0	-0.03265	0	-0.01291	0.07683	-0.03674	-0.03642	0	0.00308	0	0.0937535	m	Br8-C16-Cd2-Cu2-H28-N24-O6	2	2	equal_bothsteps	equal	2	Success at all eik	This sg doesnt have any
199	GENRUO_FSR	0	0	0	0	0.09361	0	0	0	0	0.07505	0	0	0.06622	-0.0033	0.06078	0	0	0	0.09361	mm2	Bi4-H40-C52-S4-O12-F12	0	0	equal_bothsteps	equal	0	Success at all eik	This sg doesnt have any
664	EBOYOK_FSR	0	0	0	0	0.00489	0	0	0	0	-0.00932	0	0	0.03553	0.0019	-0.08656	0	0	0	0.0935875	mm2	C16-H24-N8-S12-Sn4	0	0	equal_bothsteps	equal	0	Success at all eik	This sg doesnt have any
1226	RARZAN_FSR	0.00015	-8e-05	0.00014	-0.0356	4e-05	-0.03302	-0.04414	0.04169	-0.02516	4e-05	-0.06655	2e-05	0.0003	0.00117	-0.00026	0.01089	0.00032	-0.08235	0.0935337	2	Cu2-H24-C20-N4-O10	0	2	notequal_bothsteps	equal	0	Success at all eik	This sg doesnt have any
125	MISLAE_FSR	0	0	0	0	-0.05417	0	0	0	0	0.01406	0	0	-0.05719	0.02592	0.06927	0	0	0	0.0934926	mm2	Li4-H36-C20-Br4-N4-O8	0	0	equal_bothsteps	equal	0	Success at all eik	This sg doesnt have any
31	RISBUT_FSR	0.0082	-0.00287	-0.00381	0	0.0143	0	0	0	0	0.01635	0	-0.00275	0.06076	0.05709	0.04134	0	-0.00289	0	0.093116	m	C24-Cd2-H28-O18-P4-V2	0	0	equal_bothsteps	equal	0	Success at all eik	This sg doesnt have any
328	OZAXET_FSR	0	0	0	0.01061	0	-0.06782	-0.0448	-0.00115	0.01106	0	-0.04062	0	0	0	0	0.09043	0	-0.00484	0.0928699	2	Co2-H20-C26-O12	6	6	equal_bothsteps	equal	6	Success at all eik	This sg doesnt have any
779	SOMMOY_FSR	0	0	0	-0.01328	0	-0.03021	-0.01595	0.08149	-0.04123	0	-0.00341	0	0	0	0	-0.04169	0	0.01034	0.0927716	2	Cd2-H28-C36-S2-N4-O18	0	0	equal_bothsteps	equal	0	Success at all eik	This sg doesnt have any
1406	RORSID01_FSR	0.06558	-0.06558	0	-0.00075	0	0	0	0	0	0	0.00075	-0.06558	0	0	0	0	0	0	0.0927472	32	Cu6-H36-C42-N18-O18	6	6	equal_bothsteps	equal	6	Success at all eik	Success at all eik
710	XEJVEP_FSR	0.05515	-0.02981	0.00477	0	-0.00754	0	0	0	0	0.0395	0	-0.08391	0.01075	0.0378	-0.06596	0	-0.03592	0	0.0927423	m	C20-H16-N8-O18-Sr2	0	0	equal_bothsteps	equal	0	Success at all eik	This sg doesnt have any
423	QOGJAX_FSR	0	0	0	0.00433	0	-0.08242	-0.00765	-0.01598	-0.01395	0	0.00463	0	0	0	0	-0.01013	0	-0.04201	0.0925119	2	K2-H44-C34-N6-O12	0	0	equal_bothsteps	equal	0	Success at all eik	This sg doesnt have any
1064	MASXUA_FSR	0	0	0	0.02551	0	0.05126	0.0406	-0.07033	0.04385	0	-0.00629	0	0	0	0	0.01325	0	0.02609	0.0925044	2	Zn2-H44-C46-N8-O8	0	0	equal_bothsteps	equal	0	Success at all eik	This sg doesnt have any
530	CODFEH_FSR	0	0	0	-0.00475	-0.05745	0	0	0	0	-0.05745	0.00475	0	-0.05217	-0.05217	0.05577	0	0	0	0.0924863	4	Mn4-H32-C16-O28	20	20	equal_bothsteps	equal	20	Success at all eik	Success at all eik
1137	YUZCED_FSR	0.06489	-0.06489	0	-0.0106	0	0	0	0	0	0	0.01059	-0.06489	0	0	0	0	0	0	0.0923785	32	Zn6-H36-C33-N48-O6	0	0	equal_bothsteps	equal	0	Success at all eik	Success at all eik
1023	MCYSZN_FSR	0	0	0	-0.01039	0	0.0043	-0.0211	-0.07296	0.04816	0	-0.02092	0	0	0	0	-0.0346	0	-0.04081	0.0923331	2	Zn2-H32-C16-S4-N4-O8	0	0	equal_bothsteps	equal	0	Success at all eik	This sg doesnt have any
600	UMUZUY_FSR	0	0	0	0.02474	0	-0.04496	-0.04737	0.07905	-0.00223	0	0.00497	0	0	0	0	-0.03011	0	0.03983	0.0923174	2	Ni2-H24-C16-S4-N4-O8	4	0	notequal_bothsteps	equal	4	Success at all eik	This sg doesnt have any
542	OGUVOC_FSR	-0.06674	-0.02568	-0.02268	0	-0.01794	0	0	0	0	0.03832	0	-0.05128	-0.04196	0.07269	0.02472	0	0.02901	0	0.092226	m	C32-H28-Mo6-N12-Ni2-O20	4	4	equal_bothsteps	notequal	0	Success at all eik	This sg doesnt have any
451	SIRPUF_FSR	-0.00047	0.00059	-0.00023	0	-0.04518	0	0	0	0	0.00523	0	-0.00069	-0.06547	0.00411	0.0648	0	0	0	0.0922079	m	Br4-C36-H24-K4-O8	0	0	equal_bothsteps	equal	0	Success at all eik	This sg doesnt have any
922	IWAXUA_FSR	0.06835	0.01212	-0.05451	-0.02387	-0.00237	-0.00813	0.00084	0.00568	-0.00566	-0.00455	-0.02429	0.00317	-0.00389	-0.00242	0.00413	-0.00269	-0.05537	-0.01748	0.0920629	1	Cd1-H36-C36-Br2-N4-O5	0	0	equal_bothsteps	equal	0	This sg doesnt have any	This sg doesnt have any
628	DEFNOU_FSR	0.04494	-0.04494	0	0.00782	-0.02248	0.04366	0.04366	-0.04366	0	-0.02249	-0.00781	-0.04494	0.00831	0.00831	-0.05645	0	0	0	0.0917493	3	Ni9-H21-C15-Cl3-O33	18	18	equal_bothsteps	notequal	6	Success at all eik	Success at all eik
1167	HUHCOD_FSR	0	0	0	-0.07649	0	0.02095	0.026	0.00321	-0.07188	0	-0.04596	0	0	0	0	-0.0403	0	-0.07556	0.0916477	2	C22-H22-N4-O4-Zn1	0	0	equal_bothsteps	equal	0	Success at all eik	This sg doesnt have any
277	GOTJAA_FSR	0	0	0	-0.00992	0	-0.03473	-0.07016	0.05817	0.00309	0	-0.00868	0	0	0	0	0.01273	0	-0.01134	0.0916028	2	Rb4-H40-C56-S8-N4-O32	0	0	equal_bothsteps	equal	0	Success at all eik	This sg doesnt have any
1034	NATCER_FSR	0	0	0	-0.01197	0	-0.00709	-0.00921	0.06634	-0.06053	0	0.0148	0	0	0	0	-0.04212	0	-0.01443	0.0914808	2	Zn2-H24-C32-N4-O10	0	0	equal_bothsteps	equal	0	Success at all eik	This sg doesnt have any
121	GOZMIT_FSR	0.03725	-0.03218	0.02647	0	0.05527	0	0	0	0	-0.0241	0	-0.00736	0.02151	-0.03629	0.0072	0	0.02509	0	0.0912345	m	C24-H14-La2-N4-O14	0	0	equal_bothsteps	equal	0	Success at all eik	This sg doesnt have any
986	LUKHEE01_FSR	0.07627	-0.03606	-0.00098	0	-0.01492	0	0	0	0	0.04995	0	-0.03793	-0.02013	0.03273	0.01054	0	-0.01293	0	0.0912057	m	Zn2-H24-C28-N8-O8	0	0	equal_bothsteps	equal	0	Success at all eik	This sg doesnt have any
549	LALKEP_FSR	0	0	0	0	-0.06533	0	0	0	0	-0.01007	0	0	-0.02512	0.01487	0.08637	0	0	0	0.0911697	mm2	Mn4-H12-C28-N4-O16	20	20	equal_bothsteps	equal	20	Success at all eik	This sg doesnt have any
1199	CIJWID_FSR	0	0	0	0.06854	0	0	0	0	0	0	0.05681	0	0	0	0	0	0	0.09098	0.09098	222	Zn4-H48-C40-N16-O16	0	0	equal_bothsteps	equal	0	Success at all eik	This sg doesnt have any
980	CUSVUI_FSR	0.0089	-0.04931	-0.04422	0	-0.00387	0	0	0	0	-0.01481	0	-0.01882	0.03335	0.02341	-0.06306	0	0.04249	0	0.0909208	m	Zn2-H16-C26-S2-N6-Cl2-O6	0	0	equal_bothsteps	equal	0	Success at all eik	This sg doesnt have any
1126	KEVLEE_FSR	0	0	0	0	-0.01658	0	0	0	0	0.06704	0	0	-0.02905	0.0765	-0.03948	0	0	0	0.0908561	mm2	C24-H24-N16-Zn4	0	0	equal_bothsteps	equal	0	Success at all eik	This sg doesnt have any
262	DEMMIS_FSR	0	0	0	0	0.05149	0	0	0	0	0.03106	0	0	0.02735	0.04888	-0.07141	0	0	0	0.0907561	mm2	Na4-H32-C40-N8-Cl4-O16	0	0	equal_bothsteps	equal	0	Success at all eik	This sg doesnt have any
1096	PEQVEP_FSR	0	0	0	0.01872	0.03337	0	0	0	0	-0.03336	0.01872	0	0.05387	-0.05387	0	0	0	0.0492	0.0906895	-4	C24-H24-N16-S24-Zn4	0	0	equal_bothsteps	equal	0	Success at all eik	Success at all eik
796	VEDVEH_FSR	0	0	0	-0.02037	0	0.04684	0.05014	-0.06347	0.01103	0	-0.03938	0	0	0	0	0.00558	0	-0.01816	0.0906361	2	C34-Cd2-H32-O14	0	0	equal_bothsteps	equal	0	Success at all eik	This sg doesnt have any
1192	VUWTAL_FSR	0	0	0	0	-0.03817	-0.01732	-0.01732	0.01732	0	-0.03814	0	0	-0.04465	-0.04465	0.06499	0	0	0	0.0906143	3m	C36-H30-N18-O18-Zn6	0	0	equal_bothsteps	equal	0	Success at all eik	Success at all eik
1060	RUBDOI_FSR	0.042	-0.07246	0.02901	0	0.01096	0	0	0	0	-0.00311	0	-0.08979	0.01512	0.00406	-0.02056	0	0.02701	0	0.0898438	m	C44-H36-N8-O8-Zn2	0	0	equal_bothsteps	equal	0	Success at all eik	This sg doesnt have any
1174	GIFKOY_FSR	0	0	0	0	-0.03877	0	0	0	0	0.02755	0	0	-0.06794	0.0462	0.03564	0	0	0	0.0895572	mm2	C44-H44-N24-O24-S4-Zn6	0	0	equal_bothsteps	equal	0	Success at all eik	This sg doesnt have any
1305	CUHMAM01_FSR	0	0	0	0.00078	0	0.08273	0.0741	0.01408	-0.04611	0	-0.01366	0	0	0	0	-0.03313	0	0.00371	0.0894527	2	Cu2-H20-C16-O20	2	2	equal_bothsteps	equal	2	Success at all eik	This sg doesnt have any
1237	LELCOV_FSR	0	0	0	-0.02184	0	0.01775	-0.01323	-0.00325	-0.0639	0	-0.01757	0	0	0	0	-0.08438	0	-0.02376	0.0892527	2	Cu2-H20-C26-N4-O8	0	2	notequal_bothsteps	equal	0	Success at all eik	This sg doesnt have any
1059	FIQBOW_FSR	0	0	0	0	-0.0848	0	0	0	0	-0.00703	0	0	-0.07188	0.04081	-0.03235	0	0	0	0.0887621	mm2	Zn4-H32-C32-Cl8-O4	0	0	equal_bothsteps	equal	0	Success at all eik	This sg doesnt have any
725	RIFRAB_FSR	0	0	0	0.03701	0	0.02604	0.01968	0.02886	-0.06549	0	0.04854	0	0	0	0	-0.04341	0	0.05757	0.0886864	2	Cd2-H16-C12-S2-N4-O12	0	0	equal_bothsteps	equal	0	Success at all eik	This sg doesnt have any
1418	OPOJUA_FSR	0.08148	-0.02953	0.00153	-0.00395	-0.00779	0.00895	0.01446	-0.0061	0.00557	-0.00061	-0.00325	-0.03688	-0.00746	-0.0058	0.00724	-0.0022	-0.01832	-0.00237	0.0886701	1	Cu1-H29-C32-N5-O6	1	1	equal_bothsteps	equal	1	This sg doesnt have any	This sg doesnt have any
598	EMOPIH_FSR	0	0	0	-0.00085	0	0.01563	0.00634	-0.07912	0.03881	0	-0.00662	0	0	0	0	0.03	0	-0.02366	0.0886014	2	Ni2-H40-C28-O10	4	4	equal_bothsteps	equal	4	Success at all eik	This sg doesnt have any
892	KIKBIR_FSR	0	0	0	0.07262	0	0	0	0	0	0	0.08094	0	0	0	0	0	0	0.0885	0.0885	222	Cd4-H32-C48-S8-N40-O8	0	0	equal_bothsteps	equal	0	Success at all eik	This sg doesnt have any
706	NOCLOH01_FSR	0.02086	-0.02086	0	-0.00151	-0.00878	-0.05834	-0.05834	0.05834	0	-0.00878	0.00152	-0.02086	-0.02254	-0.02254	0.04434	0	0	0	0.0880729	3	Sr3-H33-C33-N3-O15	0	0	equal_bothsteps	equal	0	Success at all eik	Success at all eik
740	YAQMIO_FSR	0	0	0	0	0.08798	0	0	0	0	-0.03889	0	0	-0.01022	0.00752	-0.02191	0	0	0	0.08798	mm2	Cd2-H20-C20-Br4-N12-O8	0	0	equal_bothsteps	equal	0	Success at all eik	This sg doesnt have any
149	CEBFUL_FSR	0.05173	-0.00787	-0.04953	0	0.04403	0	0	0	0	-0.04539	0	-0.04338	0.01162	-0.03802	0.01949	0	-0.03579	0	0.0879185	m	C24-H40-O26-Y4	0	0	equal_bothsteps	equal	0	Success at all eik	This sg doesnt have any
486	XUNJUM_FSR	0.01363	0.02106	-0.05652	0	-0.00519	0	0	0	0	0.00549	0	0.02466	-0.01245	-0.00399	0.05091	0	-0.05328	0	0.0878178	m	C24-H28-Mn2-O8	10	10	equal_bothsteps	equal	10	Success at all eik	This sg doesnt have any
226	IVEFOG_FSR	-0.05612	0.05012	0.01245	0	0.04329	0	0	0	0	0.00767	0	-0.01304	0.01509	0.01524	-0.03447	0	0.01988	0	0.0878175	m	C40-H68-K2-N2-O2	0	0	equal_bothsteps	equal	0	Success at all eik	This sg doesnt have any
638	FELJAJ_FSR	-0.03919	0.00326	0.04019	-0.01042	-0.01318	-0.03656	-0.03543	-0.00757	0.02194	-0.02449	-0.00854	-0.02546	-0.0113	-0.00815	0.01238	-0.0091	0.03479	0.00141	0.0876849	1	H31-Pb1-C29-N5-O7	0	0	equal_bothsteps	equal	0	This sg doesnt have any	This sg doesnt have any
422	BOXDID_FSR	0	0	0	0.06287	0	0	0	0	0	0	0.07146	0	0	0	0	0	0	0.08767	0.08767	222	Cs4-P4-H16-C8-O24	0	0	equal_bothsteps	equal	0	Success at all eik	This sg doesnt have any
91	MISKEH_FSR	0	0	0	0	-0.05058	0	0	0	0	0.00884	0	0	-0.04836	0.01951	0.07031	0	0	0	0.0875376	mm2	Li4-H36-C20-I4-N4-O8	0	0	equal_bothsteps	equal	0	Success at all eik	This sg doesnt have any
1189	ICEMAF_FSR	-0.05059	0.06136	-0.00926	0	0.03517	0	0	0	0	-0.04316	0	0.05067	0.02722	-0.00292	-0.03834	0	0.02677	0	0.0875291	m	C58-H44-N4-O16-Zn4	0	0	equal_bothsteps	equal	0	Success at all eik	This sg doesnt have any
1214	CIFGOP_FSR	0.0008	0.01173	-0.01293	0	0.00545	0	0	0	0	-0.08736	0	-0.00409	-0.00618	-0.0431	0.03072	0	-0.00984	0	0.0874557	m	Zn4-H52-C60-N4-O20	0	0	equal_bothsteps	equal	0	Success at all eik	This sg doesnt have any
256	PUPXII01_FSR	0	0	0	0	0.03403	0	0	0	0	0.00152	0	0	0.01696	-0.08271	0.02219	0	0	0	0.0872982	mm2	Mn4-H28-C40-N12-O20	20	20	equal_bothsteps	equal	20	Success at all eik	This sg doesnt have any
1399	IROTAL_FSR	0	0	0	0	0.0215	0	0	0	0	-0.01956	0	0	0.04967	-0.03081	-0.06428	0	0	0	0.0868809	mm2	C36-Cl2-Cu4-H24-N8-O4	2	2	equal_bothsteps	equal	2	Success at all eik	This sg doesnt have any
1093	FIQGEU_FSR	0	0	0	0	-0.04339	0	0	0	0	0.0641	0	0	-0.06819	0.05306	-0.00858	0	0	0	0.0868266	mm2	C64-H44-N8-O8-Zn2	0	0	equal_bothsteps	equal	0	Success at all eik	This sg doesnt have any
235	HOYMEP_FSR	0	0	0	0	0.01498	0	0	0	0	-0.08676	0	0	-0.02721	-0.03549	0.00394	0	0	0	0.08676	mm2	C48-F4-H36-Hg4-I8-N8	0	0	equal_bothsteps	equal	0	Success at all eik	This sg doesnt have any
1057	CIMZII_FSR	0	0	0	-0.01388	0	0	0	0	0	0	-0.08669	0	0	0	0	0	0	-0.03788	0.08669	222	Zn4-H24-C16-O24	0	0	equal_bothsteps	equal	0	Success at all eik	This sg doesnt have any
1142	YUZBIG_FSR	0.06021	-0.06021	0	-0.0143	0	0	0	0	0	0	0.0143	-0.06021	0	0	0	0	0	0	0.0863422	32	Zn6-H36-C30-N48	0	0	equal_bothsteps	equal	0	Success at all eik	Success at all eik
1041	ETOFEZ_FSR	0	0	0	-0.0863	0	0	0	0	0	0	-0.05368	0	0	0	0	0	0	-0.03592	0.0863	222	Zn4-H24-C28-Br8-N16	0	0	equal_bothsteps	equal	0	Success at all eik	This sg doesnt have any
132	CEBFUL01_FSR	0.05312	-0.01092	-0.04708	0	0.04226	0	0	0	0	-0.04516	0	-0.04502	0.00986	-0.03776	0.01974	0	-0.03446	0	0.0861906	m	C24-H40-O26-Y4	0	0	equal_bothsteps	equal	0	Success at all eik	This sg doesnt have any
1026	FATROJ_FSR	0.04944	-0.01376	0.01069	0	-0.04793	0	0	0	0	0.00423	0	-0.01002	-0.02726	0.01797	-0.04848	0	0.0176	0	0.0861112	m	C20-Cl2-H22-N8-O8-Zn2	0	0	equal_bothsteps	equal	0	Success at all eik	This sg doesnt have any
368	VOCXUH_FSR	-0.06088	0.06088	0	0	0	0	0	0	0	0	0	0.06088	0	0	0	0	0	0	0.0860973	-6m2	Co3-H33-C57-N6-O18	0	0	equal_bothsteps	equal	0	Success at all eik	Success at all eik
545	SEJSOQ_FSR	0	0	0	-0.01706	0	0	0	0	0	0	-0.08606	0	0	0	0	0	0	-0.04907	0.08606	222	Mn4-H24-C16-O24	20	20	equal_bothsteps	equal	20	Success at all eik	This sg doesnt have any
923	HIXWIU01_FSR	0	0	0	-0.04213	0	0	0	0	0	0	-0.08592	0	0	0	0	0	0	-0.07979	0.08592	222	Cd8-H40-C32-O52	0	0	equal_bothsteps	equal	0	Success at all eik	This sg doesnt have any
1194	UNISUH_FSR	0	0	0	0.01251	0	-0.03858	-0.05341	0.06547	-0.01448	0	0.00273	0	0	0	0	-0.03547	0	-0.00176	0.0857675	2	C26-H20-O14-P2-Zn5	0	0	equal_bothsteps	equal	0	Success at all eik	This sg doesnt have any
500	LICSUM_FSR	0	0	0	0.0771	0	0	0	0	0	0	0.08559	0	0	0	0	0	0	0.04158	0.08559	222	Mg4-H24-C16-O24	0	0	equal_bothsteps	equal	0	Success at all eik	This sg doesnt have any
991	SANBOZ_FSR	0	0	0	0	-0.00719	0	0	0	0	0.08559	0	0	-0.06549	0.01139	0.01524	0	0	0	0.08559	mm2	C12-H20-N4-O10-Zn2	0	0	equal_bothsteps	equal	0	Success at all eik	This sg doesnt have any
1323	WEGLAX_FSR	0	0	0	0	-0.00538	0	0	0	0	0.08406	0	0	-0.00133	0.08391	0.01613	0	0	0	0.0854566	mm2	C28-Cu4-H16-N12-O4-S4	0	0	equal_bothsteps	equal	0	Success at all eik	This sg doesnt have any
1027	JISKUU_FSR	0	0	0	-0.05721	0	-0.01039	-0.00656	0.00619	-0.03575	0	-0.05121	0	0	0	0	-0.03061	0	-0.06913	0.0853227	2	Zn2-H24-C28-N12-O8	0	0	equal_bothsteps	equal	0	Success at all eik	This sg doesnt have any
443	QIBBAH_FSR	0	0	0	0	0.00909	0	0	0	0	0.02779	0	0	-0.05605	0.0631	0.01058	0	0	0	0.0850597	mm2	C38-H30-K2-N4	0	0	equal_bothsteps	equal	0	Success at all eik	This sg doesnt have any
39	HEVXAI_FSR	0	0	0	0.0073	0	0.04664	0.04003	-0.07062	0.0101	0	0.02329	0	0	0	0	0.02212	0	0.03146	0.085053	2	Cd2-P4-H38-C14-N2-Cl4-O16	0	0	equal_bothsteps	equal	0	Success at all eik	This sg doesnt have any
1441	QULNES_FSR	-0.0666	-0.03498	-0.03686	0	-0.0108	0	0	0	0	-0.0231	0	-0.01872	0.02433	0.02022	-0.03925	0	-0.02414	0	0.0850187	m	C10-Cl6-Cu6-H22-N10-S2	0	0	equal_bothsteps	equal	0	Success at all eik	This sg doesnt have any
353	TIDVUZ_FSR	0.05859	0.02065	-0.05073	0	-0.00561	0	0	0	0	0.04554	0	0.01547	-0.01685	0.0115	0.02636	0	-0.02224	0	0.0846033	m	C48-Co2-H28-N4-O12-S2	2	2	equal_bothsteps	notequal	6	Success at all eik	This sg doesnt have any
324	XEGGEW_FSR	0	0	0	-0.05499	0	-0.03925	-0.012	0.02989	-0.00926	0	-0.05486	0	0	0	0	-0.02262	0	-0.05087	0.0845827	2	Co2-H28-C28-N8-Cl4	6	6	equal_bothsteps	equal	6	Success at all eik	This sg doesnt have any
267	MILBEO_FSR	0	0	0	0	-0.07646	0.02551	0.02551	-0.02551	0	-0.07643	0	0	-0.02393	-0.02393	0.02801	0	0	0	0.0845167	3m	C48-H54-O6-Tl6	0	0	equal_bothsteps	equal	0	Success at all eik	Success at all eik
23	MIRLEF_FSR	0	0	0	0	-0.05384	0	0	0	0	0.0029	0	0	-0.06263	0.01415	0.05483	0	0	0	0.0844338	mm2	C16-Cs4-H12-O26-U2	0	0	equal_bothsteps	equal	0	Success at all eik	This sg doesnt have any
319	RIWGEJ_FSR	0	0	0	0.02561	0	-0.01977	-0.02451	0.02919	0.06643	0	-0.01052	0	0	0	0	0.07971	0	-0.00421	0.0843519	2	Ca2-P2-H26-C6-O22	0	0	equal_bothsteps	equal	0	Success at all eik	This sg doesnt have any
544	GISWOX_FSR	0	0	0	0.02572	0	-0.0713	-0.04	-0.06144	-0.00339	0	-0.00611	0	0	0	0	-0.02754	0	0.02858	0.0843098	2	Mn2-H40-C40-N10-O4	4	4	equal_bothsteps	notequal	0	Success at all eik	This sg doesnt have any
65	WEZXAB01_FSR	0	0	0	0.08019	0.02599	0	0	0	0	0.02599	-0.08019	0	-0.01434	-0.01434	0.05608	0	0	0	0.0842966	6	In6-H18-C18-O36	0	0	equal_bothsteps	equal	0	Success at all eik	Success at all eik
930	HAMQIY_FSR	0	0	0	0.02065	0	-0.0777	-0.03286	-0.00207	-0.00703	0	0.00983	0	0	0	0	-0.01164	0	0.02258	0.0841543	2	C16-Cd1-H10-N10	0	0	equal_bothsteps	equal	0	Success at all eik	This sg doesnt have any
1203	FEHJIN01_FSR	0	0	0	0	0.04652	0	0	0	0	-0.01644	0	0	0.05856	-0.02584	0.05454	0	0	0	0.0840928	mm2	Zn4-P4-H40-C36-N4-O20	0	0	equal_bothsteps	equal	0	Success at all eik	This sg doesnt have any
1340	SEJTIL_FSR	0.02597	-0.00951	0.03969	-1e-05	-0.0013	-6e-05	-0.0001	-0.00012	0	0.02007	0.00019	0.00486	-0.01382	-0.03617	0.06225	1e-05	0.02093	-0.00016	0.0840355	m	C38-Cu2-H44-O14	2	2	equal_bothsteps	notequal	0	Success at all eik	This sg doesnt have any
1102	TALQUV_FSR	0	0	0	0.08384	0	0	0	0	0	0	0.02831	0	0	0	0	0	0	0.04592	0.08384	222	Zn4-H28-C32-Br8-N20	0	0	equal_bothsteps	equal	0	Success at all eik	This sg doesnt have any
722	AFADOD_FSR	0	0	0	-0.02208	0	0.01368	0.02269	-0.07073	0.00148	0	-0.0387	0	0	0	0	-0.01881	0	-0.02021	0.0837702	2	Cd2-H18-C10-Br4-N2-O6	0	0	equal_bothsteps	equal	0	Success at all eik	This sg doesnt have any
950	OJALAO_FSR	0	0	0	0.06184	0	0.00722	-0.03163	0.01634	0.04696	0	0.01679	0	0	0	0	0.04504	0	0.04379	0.0837429	2	C34-H34-N2-O8-Zn2	0	0	equal_bothsteps	equal	0	Success at all eik	This sg doesnt have any
908	AXAWED_FSR	0	0	0	-0.02575	0	0.04461	0.05354	-0.02897	-0.05743	0	0.00023	0	0	0	0	-0.06673	0	-0.00241	0.0836902	2	C34-Cd1-Cl2-H30-N6-O4	0	0	equal_bothsteps	equal	0	Success at all eik	This sg doesnt have any
1299	ROBNIG_FSR	0	0	0	0.01331	0	-0.03146	0.00836	0.05193	-0.06406	0	-0.00906	0	0	0	0	-0.02504	0	-0.01875	0.0833809	2	Cu2-H44-C34-Br2-N2-O6	0	2	notequal_bothsteps	equal	0	Success at all eik	This sg doesnt have any
1130	ECOLOZ_FSR	0	0	0	0	-0.04766	0	0	0	0	-0.04873	0	0	-0.06297	-0.0177	0.05156	0	0	0	0.0832883	mm2	Zn4-H24-C20-N16-O8	0	0	equal_bothsteps	equal	0	Success at all eik	This sg doesnt have any
1301	SOKDIH_FSR	0	0	0	0.00564	0	0.00854	0.04724	-0.06409	0.01319	0	-0.02006	0	0	0	0	0.00444	0	-0.02704	0.0831596	2	Cu2-H22-C16-S2-N6-O12	0	0	equal_bothsteps	equal	0	Success at all eik	This sg doesnt have any
1364	SENTIQ_FSR	0	0	0	-0.08312	0	0	0	0	0	0	-0.07407	0	0	0	0	0	0	-0.05607	0.08312	222	Cu4-H28-C20-S4-N4-O20	0	4	notequal_bothsteps	equal	0	Success at all eik	This sg doesnt have any
1388	DUXZEC_FSR	-0.00637	0.01268	0.00733	-0.01908	0.03296	-0.00725	-0.01353	-0.0389	-0.03332	0.02912	-0.00077	0.01639	0.01153	0.02825	0.01426	-0.0272	0.02232	-0.01111	0.0831053	1	Cu3-H10-C16-S3-N7	0	0	equal_bothsteps	equal	0	This sg doesnt have any	This sg doesnt have any
1328	RIGROR_FSR	-0.04869	-0.01887	0.01865	-0.02796	0.03484	0.0233	0.02376	0.05738	0.04339	-0.02111	-0.00683	0.00841	0.01296	-0.01285	-0.00319	0.00296	-0.00567	-0.01716	0.0830977	1	Cu2-H38-C34-N18	0	0	equal_bothsteps	equal	0	This sg doesnt have any	This sg doesnt have any
754	MIKJUM_FSR	0	0	0	0	0.047	0	0	0	0	-0.0176	0	0	-0.02914	-0.07547	-0.01814	0	0	0	0.0829091	mm2	C28-Cd2-H16-N12-O4-S4	0	0	equal_bothsteps	equal	0	Success at all eik	This sg doesnt have any
1274	LEXNOT_FSR	-0.00015	0.00047	-0.00031	-0.02177	-2e-05	-0.04416	0.0233	0.06967	0.03257	-6e-05	-0.02033	0.00022	-0.00037	-3e-05	-0.00026	-0.01076	0.00064	-0.05034	0.0828943	2	C25-Cu2-H23-N15-O2	0	2	notequal_bothsteps	equal	0	Success at all eik	This sg doesnt have any
412	NIVXAU_FSR	-0.02501	-0.03583	-0.01797	0	-0.00885	0	0	0	0	-0.00788	0	-0.06456	-0.01057	-0.03318	-0.0272	0	0.0672	0	0.0828656	m	C24-Fe2-H26-N2-S4	8	8	equal_bothsteps	equal	8	Success at all eik	This sg doesnt have any
456	KHPHAL02_FSR	0	0	0	0	0.01135	0	0	0	0	0.02845	0	0	0.00419	0.04291	-0.07019	0	0	0	0.0823739	mm2	K4-H20-C32-O16	0	0	equal_bothsteps	equal	0	Success at all eik	This sg doesnt have any
1273	HADVUE_FSR	0	0	0	0.04635	0	-0.02205	0.01254	-0.0299	0.03382	0	0.06764	0	0	0	0	0.00944	0	0.05695	0.0822814	2	Cu2-H20-C20-N4-O8	0	2	notequal_bothsteps	equal	0	Success at all eik	This sg doesnt have any
533	UPIYAU_FSR	0	0	0	-0.01717	0	-0.01412	-0.02975	0.01375	0.03738	0	-0.06544	0	0	0	0	0.02666	0	-0.06859	0.0821814	2	Mn4-H20-C16-O26	20	20	equal_bothsteps	notequal	10	Success at all eik	This sg doesnt have any
897	KIJWIL_FSR	-0.04635	-0.02215	0.06093	0	0.0076	0	0	0	0	0.01168	0	-0.0199	0.01053	0.00858	-0.01442	0	0.04469	0	0.0821521	m	Cd4-H52-C60-N12-O20	0	0	equal_bothsteps	equal	0	Success at all eik	This sg doesnt have any
1288	FUQKEI_FSR	0	0	0	0	0.03618	-1e-05	-1e-05	-4e-05	-1e-05	-0.00594	0	0	-0.00553	-0.03445	-0.07424	0	0	0	0.0820302	mm2	C24-Cu2-H20-N20-O2	0	2	notequal_bothsteps	equal	0	Success at all eik	This sg doesnt have any
1006	LOSGIL_FSR	-0.01094	-0.03386	0.06513	-1e-05	-0.0116	1e-05	0	0	8e-05	0.00958	-5e-05	-0.06675	-0.01166	-0.02562	0.01897	-3e-05	0.05729	1e-05	0.0819574	m	C14-Cl2-H12-N10-Zn2	0	0	equal_bothsteps	equal	0	Success at all eik	This sg doesnt have any
1356	IRORUD_FSR	0	0	0	-0.03358	0	-0.07295	-0.05496	-0.0096	0.00879	0	-0.01757	0	0	0	0	0.03121	0	-0.02931	0.0818157	2	Cu2-H44-C48-N4-O14	2	2	equal_bothsteps	equal	2	Success at all eik	This sg doesnt have any
1025	IMACZN01_FSR	0	0	0	0.05963	0	0	0	0	0	0	0.08169	0	0	0	0	0	0	0.07447	0.08169	222	C16-H24-N4-O16-Zn2	0	0	equal_bothsteps	equal	0	Success at all eik	This sg doesnt have any
306	IXOJOW_FSR	0	0	0	0.03449	0	0.01764	0.0644	0.00772	0.04909	0	0.00391	0	0	0	0	0.06151	0	0.03007	0.0814375	2	Co2-H18-C12-N6-O12	6	6	equal_bothsteps	equal	6	Success at all eik	This sg doesnt have any
322	SOSKOC_FSR	0	0	0	0.05875	0	0.01354	0.00357	-0.01582	0.01237	0	0.05088	0	0	0	0	0.04315	0	0.0396	0.0812739	2	Co2-H28-C28-N8-Cl4	6	6	equal_bothsteps	equal	6	Success at all eik	This sg doesnt have any
998	JARFEO_FSR	0	0	0	-0.04636	0	-0.04525	-0.00707	0.00612	0.00093	0	-0.04769	0	0	0	0	-0.02022	0	-0.04732	0.0812216	2	Zn2-H28-C28-N8-Cl4	0	0	equal_bothsteps	equal	0	Success at all eik	This sg doesnt have any
877	COXQUB_FSR	0	0	0	0.00111	0	-0.01011	-0.01866	-0.04074	0.06731	0	0.00739	0	0	0	0	0.04779	0	-0.00011	0.0811985	2	C40-Cd4-H44-N8-O22-S4	0	0	equal_bothsteps	equal	0	Success at all eik	This sg doesnt have any
284	GAXQAZ_FSR	0.02157	-0.05931	0.03339	0	0.03259	0	0	0	0	-0.0078	0	-0.04077	0.0198	-0.01113	-0.00841	0	0.02159	0	0.081074	m	C40-H44-N8-O8-Zn2	0	0	equal_bothsteps	equal	0	Success at all eik	This sg doesnt have any
540	TEKDUI01_FSR	0	0	0	-0.01849	0	-0.01173	-0.02603	0.01361	0.03353	0	-0.06743	0	0	0	0	0.02406	0	-0.06972	0.0808323	2	Mn4-H20-C16-O26	20	20	equal_bothsteps	notequal	10	Success at all eik	This sg doesnt have any
210	FOHCIP_FSR	0	0	0	0	0.04247	0	0	0	0	0.05268	0	0	0.03288	0.0293	-0.06736	0	0	0	0.0804795	mm2	Cd4-Hg4-H40-C32-S16-N24-O8	0	0	equal_bothsteps	equal	0	Success at all eik	This sg doesnt have any
1044	DUGFIW_FSR	0	0	0	-0.06592	0	0.00926	0.02393	-0.01193	-0.01976	0	-0.05896	0	0	0	0	-0.01821	0	-0.07744	0.0802781	2	C44-H28-N6-O8-S2-Zn2	0	0	equal_bothsteps	equal	0	Success at all eik	This sg doesnt have any
80	YOTDUH_FSR	0	0	0	-0.04885	0	-0.00301	0.03908	0.00826	-0.05483	0	-0.04278	0	0	0	0	-0.05072	0	-0.03218	0.0801993	2	C14-Cl2-H20-N2-Na2-O7-S2	0	0	equal_bothsteps	equal	0	Success at all eik	This sg doesnt have any
1152	CUQPUB_FSR	-0.04436	0.05419	-0.00926	0	0.03326	0	0	0	0	-0.00444	0	0.05415	0.00446	0.01324	-0.02272	0	0.01714	0	0.080057	m	Zn4-H36-C52-N20-O8	0	0	equal_bothsteps	equal	0	Success at all eik	This sg doesnt have any
141	HACGID_FSR	0	0	0	-0.00118	0	-0.06653	-0.07214	0.02503	0.02111	0	-0.01013	0	0	0	0	0.00698	0	-0.02214	0.0798682	2	Tl4-H32-C20-N4-O16	0	0	equal_bothsteps	equal	0	Success at all eik	This sg doesnt have any
74	QUMVOK_FSR	0	0	0	0	-0.01998	0	0	0	0	-0.07011	0	0	0.03766	-0.06437	-0.02835	0	0	0	0.0797841	mm2	C16-H16-Hg2-N8-S4	0	0	equal_bothsteps	equal	0	Success at all eik	This sg doesnt have any
875	DIYTAI_FSR	0	0	0	0.0338	0	-0.06341	-0.05097	0.05289	0.0029	0	0.03099	0	0	0	0	-0.02569	0	0.0057	0.0797752	2	Cd4-H48-C52-N8-O20	0	0	equal_bothsteps	equal	0	Success at all eik	This sg doesnt have any
1243	BAHGUN01_FSR	-0.06387	0.03228	-0.02741	-1e-05	-0.02169	9e-05	0.00058	-0.00044	-0.00032	-0.02073	6e-05	0.01543	-0.00519	0.00523	0.04026	7e-05	-0.0164	-5e-05	0.0797328	m	C24-Cu2-H16-N4-O8	2	2	equal_bothsteps	notequal	0	Success at all eik	This sg doesnt have any
1193	MEHVIH_FSR	0	0	0	0	0.0158	0	0	0	0	-0.03691	0	0	0.05219	-0.06009	-0.00382	0	0	0	0.0796818	mm2	C48-Cl4-H32-N12-O4-Zn4	0	0	equal_bothsteps	equal	0	Success at all eik	This sg doesnt have any
532	HEYQIO_FSR	0	0	0	-0.00754	0	0.07664	0.02471	0.01568	0.03435	0	-0.0132	0	0	0	0	0.05691	0	0.01946	0.0796516	2	Na2-H32-C26-S2-N2-O8	0	0	equal_bothsteps	equal	0	Success at all eik	This sg doesnt have any
214	IXAJIB_FSR	0	0	0	0.0342	0	-0.05221	-0.02816	-0.02514	0.06502	0	0.02518	0	0	0	0	0.01604	0	0.02158	0.0792883	2	C66-Cr4-H48-N4-O20-Zn2	0	0	equal_bothsteps	equal	0	Success at all eik	This sg doesnt have any
497	XECSUV_FSR	0	0	0	0	-0.0791	0	0	0	0	0.00911	0	0	-0.04478	0.03719	0.01801	0	0	0	0.0791	mm2	Li4-H20-C20-N8-O12	0	0	equal_bothsteps	equal	0	Success at all eik	This sg doesnt have any
1380	CUGLTM01_FSR	1e-05	-2e-05	-3e-05	-0.02708	0	0	0	0	0	-1e-05	-0.07907	0.00047	-1e-05	0	0	1e-05	-1e-05	-0.03599	0.0790717	222	Cu4-H36-C20-N4-O20	0	4	notequal_bothsteps	notequal	2	Success at all eik	This sg doesnt have any
339	QOSXON_FSR	0	0	0	-0.07694	0	0	0	0	0	0	-0.07896	0	0	0	0	0	0	-0.03468	0.07896	222	Ca2-H24-C8-O20	0	0	equal_bothsteps	equal	0	Success at all eik	This sg doesnt have any
1163	DEHHEG_FSR	0	0	0	-0.07885	0	0	0	0	0	0	0.07885	0	0	0	0	0	0	0	0.07885	422	Zn4-H32-C40-N16-O16	0	0	equal_bothsteps	equal	0	Success at all eik	Success at all eik
956	WEXCIN_FSR	0	0	0	0.07166	0	0.0072	-0.03944	0.04953	0.02915	0	0.03433	0	0	0	0	0.02527	0	0.03705	0.0788292	2	Zn2-H38-C30-S2-N6-O14	0	0	equal_bothsteps	equal	0	Success at all eik	This sg doesnt have any
1258	FACRAF_FSR	0	0	0	-0.02011	0	-0.04616	-0.06555	-0.00516	0.01349	0	-0.01627	0	0	0	0	-0.02097	0	-0.05689	0.0787805	2	Cu2-H38-C24-N4-Cl2-O6	0	2	notequal_bothsteps	equal	0	Success at all eik	This sg doesnt have any
548	OZEPIT_FSR	0	0	0	0.07218	0	-0.00909	-0.00089	0.00142	-0.00773	0	0.07831	0	0	0	0	-0.0053	0	0.05927	0.0787084	2	C46-F12-H30-Mn2-N2-O8	10	10	equal_bothsteps	equal	10	Success at all eik	This sg doesnt have any
821	MUFHAX_FSR	0	0	0	0	0.02781	0	0	0	0	0.01506	0	0	-0.02358	0.02477	0.0708	0	0	0	0.078627	mm2	C24-Cd4-H20-N36	0	0	equal_bothsteps	equal	0	Success at all eik	This sg doesnt have any
855	EGEBEY_FSR	0	0	0	0.06368	0	0	0	0	0	0	0.0786	0	0	0	0	0	0	0.03147	0.0786	222	Cd4-H20-C12-S4-N4-O8	0	0	equal_bothsteps	equal	0	Success at all eik	This sg doesnt have any
1094	BOYSIT_FSR	-0.02343	-0.0156	0.03934	0	-0.00829	0	0	0	0	-0.05322	0	-0.02599	-0.00615	-0.03473	0.04762	0	0.03555	0	0.078404	m	Zn2-H42-C62-N10-O14	0	0	equal_bothsteps	equal	0	Success at all eik	This sg doesnt have any
248	HAYQIK_FSR	-0.0222	0.00784	0.00674	0	0.01911	0	0	0	0	-0.04603	0	0.00432	0.01281	-0.05629	0.04997	0	0.01733	0	0.0782984	m	C48-H60-La2-N6-O26	0	0	equal_bothsteps	equal	0	Success at all eik	This sg doesnt have any
782	COVBOG_FSR	0	0	0	0.06631	0	0.01084	-0.03874	0.05725	0.01847	0	0.03153	0	0	0	0	0.01825	0	0.03467	0.0781897	2	Cd2-H38-C30-S2-N6-O14	0	0	equal_bothsteps	equal	0	Success at all eik	This sg doesnt have any
817	XELHUT_FSR	0	0	0	0.07818	0	0	0	0	0	0	0.02397	0	0	0	0	0	0	0.04909	0.07818	222	Cd4-H28-C32-I8-N20	0	0	equal_bothsteps	equal	0	Success at all eik	This sg doesnt have any
755	XAHGAQ_FSR	0	0	0	0	-0.02454	0	0	0	0	0.04009	0	0	-0.02397	0.04448	-0.0596	0	0	0	0.0781357	mm2	C24-Cd2-H16-N20-S4	0	0	equal_bothsteps	equal	0	Success at all eik	This sg doesnt have any
99	TEVQIU01_FSR	0	0	0	0.01337	0	0.05436	0.04304	-0.06387	-0.00327	0	0.01216	0	0	0	0	-0.00087	0	0.01055	0.0780409	2	C30-Cl4-H54-Hg4-N2-S4	0	0	equal_bothsteps	equal	0	Success at all eik	This sg doesnt have any
297	EGISEU_FSR	-0.06601	0.00339	0.03916	0	0.00962	0	0	0	0	0.01152	0	-0.03759	0.01498	-0.00222	0.00405	0	0.0136	0	0.0779953	m	C12-Ca2-H18-N18-O12	0	0	equal_bothsteps	equal	0	Success at all eik	This sg doesnt have any
1265	SOKQIT_FSR	0	0	0	-0.0033	0	0.01693	0.02394	0.00489	0.02899	0	-0.01365	0	0	0	0	-0.05295	0	-0.05629	0.0779555	2	Cu2-H34-C26-N10-O4	0	2	notequal_bothsteps	equal	0	Success at all eik	This sg doesnt have any
1332	MEHPAQ_FSR	0	0	0	0.01709	0	0	0	0	0	0	0.07774	0	0	0	0	0	0	0.01855	0.07774	222	Cu4-H36-C20-N4-O20	4	4	equal_bothsteps	equal	4	Success at all eik	This sg doesnt have any
1404	TORXOP01_FSR	0	0	0	-0.03102	0	0	0	0	0	0	-0.07774	0	0	0	0	0	0	-0.00269	0.07774	222	Cu4-H4-C4-N28	0	4	notequal_bothsteps	equal	0	Success at all eik	This sg doesnt have any
1008	CIHROB_FSR	0	0	0	-0.05801	0	0.02836	0.01423	0.01488	-0.02751	0	-0.03536	0	0	0	0	0.02918	0	-0.03565	0.0776977	2	Zn2-H26-C22-N10-O8	0	0	equal_bothsteps	equal	0	Success at all eik	This sg doesnt have any
1375	LIYVOG_FSR	0	-4e-05	7e-05	0	0.02437	0	0	0	0	-0.0735	0	0	0.02715	-0.04505	0.05676	0	0	0	0.0773843	mm2	Cu4-H16-C28-N8-O28	0	4	notequal_bothsteps	equal	0	Success at all eik	This sg doesnt have any
842	MERFAT_FSR	0	0	0	-0.06198	0	0	0	0	0	0	-0.0773	0	0	0	0	0	0	-0.056	0.0773	222	Cd4-H28-C24-N12-O20	0	0	equal_bothsteps	equal	0	Success at all eik	This sg doesnt have any
188	BIZHID01_FSR	0	0	0	0	0.04214	1e-05	2e-05	6e-05	-1e-05	0.02845	0	0	-0.02107	-0.00531	-0.074	1e-05	0	0	0.0771242	mm2	C28-Cu2-H32-N12-S4	0	0	equal_bothsteps	equal	0	Success at all eik	This sg doesnt have any
1257	MEWSUF_FSR	0	0	0	-0.0752	0	-0.00601	0.00259	-0.04022	0.01045	0	-0.06299	0	0	0	0	-0.00195	0	-0.06853	0.0770862	2	Cu2-H32-C20-N6-Cl2-O6	0	2	notequal_bothsteps	equal	0	Success at all eik	This sg doesnt have any
837	OXAZUK_FSR	0	0	0	-0.00273	0	0	0	0	0	0	-0.07704	0	0	0	0	0	0	-0.02915	0.07704	222	Cd4-H20-C24-S4-N12-Cl8	0	0	equal_bothsteps	equal	0	Success at all eik	This sg doesnt have any
632	BOJKAM_FSR	0	0	0	0.01554	0	0	0	0	0	0	0.07702	0	0	0	0	0	0	0.0567	0.07702	222	Ni4-H36-C16-N4-O24	8	8	equal_bothsteps	equal	8	Success at all eik	This sg doesnt have any
1363	XIPCEF01_FSR	0	0	0	-0.07547	0	0	0	0	0	0	-0.07684	0	0	0	0	0	0	-0.07496	0.07684	222	Cu4-H16-C24-N16-O8	0	4	notequal_bothsteps	equal	0	Success at all eik	This sg doesnt have any
86	OGUMUZ_FSR	0	0	0	0.03984	0	0.03376	-0.00434	-0.06026	0.01447	0	0.04417	0	0	0	0	0.04942	0	0.02802	0.0768296	2	Ni2-H32-C34-S2-N4-O14	0	0	equal_bothsteps	equal	0	Success at all eik	This sg doesnt have any
823	DOZZOI_FSR	0	0	0	0	0.05342	0	0	0	0	-0.03935	0	0	0.05605	-0.02159	-0.04739	0	0	0	0.0765084	mm2	C20-Cd4-H32-N16-O4-S8	0	0	equal_bothsteps	equal	0	Success at all eik	This sg doesnt have any
1393	NORYAW_FSR	0	0	0	0	0.04808	0	0	0	0	-0.04002	0	0	0.00104	-0.07532	0.01329	0	0	0	0.0764906	mm2	C24-Cu4-H32-N16	0	0	equal_bothsteps	equal	0	Success at all eik	This sg doesnt have any
1296	CUICOL10_FSR	0	0	0	0	0.01762	0	0	0	0	0.04124	0	0	0.03111	0.06083	-0.03436	0	0	0	0.076477	mm2	Cu2-H22-C16-I2-N2	0	0	equal_bothsteps	equal	0	Success at all eik	This sg doesnt have any
1235	ELENEP_FSR	-0.01447	0.02157	-0.00053	0.00964	-0.00256	-0.01383	0.02742	-0.04021	-0.01153	-0.00398	-0.05286	0.01041	0.00522	0.0047	0.01028	-0.02388	-0.00196	0.00108	0.0760016	1	Cu2-H26-C16-N6-O8	0	0	equal_bothsteps	equal	0	This sg doesnt have any	This sg doesnt have any
787	RUVBER_FSR	0	0	0	0	-0.04353	0	0	0	0	0.06787	0	0	-0.05363	0.04981	0.02008	0	0	0	0.0758974	mm2	Cd2-H24-C36-N12-O8	0	0	equal_bothsteps	equal	0	Success at all eik	This sg doesnt have any
1247	VEFTAB_FSR	0	0	0	-0.04936	0	-0.0315	-0.0435	-0.02523	0.05209	0	0.00165	0	0	0	0	0.03812	0	0.0295	0.0757673	2	Cu2-H16-C18-N4-Cl2	0	0	equal_bothsteps	equal	0	Success at all eik	This sg doesnt have any
828	BIWTOR_FSR	0	0	0	0	-0.03925	0	0	0	0	-0.07573	0	0	-0.06254	0.00917	0.02456	0	0	0	0.07573	mm2	Cd4-H40-C28-Se8-S4-N16	0	0	equal_bothsteps	equal	0	Success at all eik	This sg doesnt have any
100	ZOMNEW_FSR	0	0	0	0.03774	0	0.02755	-0.00188	-0.01242	-0.01239	0	0.04162	0	0	0	0	-0.05649	0	0.04861	0.0757045	2	C14-H18-Mo1-N4-O4-Zn1	0	0	equal_bothsteps	equal	0	Success at all eik	This sg doesnt have any
899	CEKYEY_FSR	0	0	0	0	0.02039	0	0	0	0	-0.07368	0	0	0.03294	-0.05528	0.03968	0	0	0	0.0756004	mm2	Cd4-H40-C48-N8-O24	0	0	equal_bothsteps	equal	0	Success at all eik	This sg doesnt have any
745	EDEYES_FSR	0.02593	0.01789	-0.04214	0	-0.00849	0	0	0	0	-0.03	0	0.00405	0.01767	-0.04443	0.04247	0	0.00277	0	0.075557	m	C24-Cd2-H28-N8-O14-S2	0	0	equal_bothsteps	equal	0	Success at all eik	This sg doesnt have any
552	IXUDAI_FSR	0	0	0	0	0.02053	0.0514	0.0514	-0.0514	0	0.02054	0	0	0.04708	0.04708	0.02766	0	0	0	0.0755368	3m	B2-C12-H8-N24-Na2-O12	0	0	equal_bothsteps	equal	0	Success at all eik	Success at all eik
1119	XALXIS01_FSR	0	0	0	0.06942	0	0	0	0	0	0	0.07551	0	0	0	0	0	0	0.0739	0.07551	222	Zn4-H16-C24-N16-O8	0	0	equal_bothsteps	equal	0	Success at all eik	This sg doesnt have any
1231	QADHOT01_FSR	0	0	0	-0.03438	0	0.02571	0.0463	-0.03619	0.01624	0	-0.0445	0	0	0	0	0.00816	0	-0.04981	0.0754811	2	Cu2-H18-C28-N2-O6	0	2	notequal_bothsteps	equal	0	Success at all eik	This sg doesnt have any
574	ERIVEI_FSR	0	0	0	0	-0.01576	0	0	0	0	-0.01139	0	0	-0.02024	-0.00944	-0.07177	0	0	0	0.0751645	mm2	C76-H44-Mn2-N8-O8	2	2	equal_bothsteps	equal	2	Success at all eik	This sg doesnt have any
108	UVIGIR_FSR	-0.02345	0.01324	0.00598	0	-0.0329	0	0	0	0	-0.01978	0	0.01052	-0.04037	-0.02183	0.05639	0	-0.00351	0	0.0749966	m	C20-H52-Li2-N2-O16-S4	0	0	equal_bothsteps	equal	0	Success at all eik	This sg doesnt have any
902	GUPCUQ02_FSR	0	0	0	0.07493	0	0	0	0	0	0	0.07493	0	0	0	0	0	0	0.07129	0.07493	-42m	C36-Cd6-H24-N36-O24	0	0	equal_bothsteps	equal	0	Success at all eik	Success at all eik
260	QAYBOK_FSR	-0.02666	0.01084	0.00426	-0.00041	0.02633	-0.00022	0.00016	0.00029	0.00029	-0.02516	0.00036	0.01658	0.04294	-0.05197	0.01621	-0.0003	-0.00438	-0.0003	0.0747476	m	C64-H44-Mn2-N8-O12-S2	10	10	equal_bothsteps	equal	10	Success at all eik	This sg doesnt have any
1017	GIYKAB_FSR	0.01163	0.01824	-0.04299	0	0.00014	0	0	0	0	0.00279	0	0.01708	0.00104	-0.01535	0.04453	0	-0.04353	0	0.0747072	m	C24-H28-O8-Zn2	0	0	equal_bothsteps	equal	0	Success at all eik	This sg doesnt have any
761	FIBJAE_FSR	0	0	0	0	-0.03742	0	0	0	0	0.00519	0	0	-0.00993	-0.01372	0.07269	0	0	0	0.074637	mm2	Cd12-H24-C12-N72-Cl8	0	0	equal_bothsteps	equal	0	Success at all eik	This sg doesnt have any
1445	RORSID05_FSR	-0.05273	0.05273	0	0.00224	0	0	0	0	0	0	-0.00225	0.05273	0	0	0	0	0	0	0.0746051	32	Cu6-H36-C42-N18-O18	6	6	equal_bothsteps	equal	6	Success at all eik	Success at all eik
583	COQYUD_FSR	0.05063	0.02994	0.02058	0	-0.02525	0	0	0	0	0.00299	0	0.03685	-0.00831	0.01772	-0.02291	0	0.04783	0	0.0745776	m	C28-H40-N4-Na2-O4-P2	0	0	equal_bothsteps	equal	0	Success at all eik	This sg doesnt have any
756	NAPTUU_FSR	0	0	0	0	-0.02356	0	0	0	0	-0.00306	0	0	-0.02061	-0.00347	-0.07148	0	0	0	0.0744728	mm2	Br4-C16-Cd2-H20-N8	0	0	equal_bothsteps	equal	0	Success at all eik	This sg doesnt have any
155	YEMNUA_FSR	0.03133	0.02687	0.02502	-0.00768	0.00471	-0.02091	-0.02777	-0.02589	-0.01086	0.00912	-0.00697	0.01786	0.00687	0.01334	0.02114	-0.00737	0.0206	-0.00785	0.0743979	1	Sn1-H20-C22-O4-F8	0	0	equal_bothsteps	equal	0	This sg doesnt have any	This sg doesnt have any
925	QUCTIS_FSR	0.02692	0.01559	-0.02249	-0.00889	0.02056	0.05756	0.02667	-0.01433	0.00519	0.0094	-0.0002	0.01269	0.02031	0.02156	-0.03633	-0.01835	-0.01864	-0.02208	0.0743938	1	Cd1-H48-C30-N6-O9	0	0	equal_bothsteps	equal	0	This sg doesnt have any	This sg doesnt have any
784	VIDZEP_FSR	-0.03065	0.01793	0.01787	0	-0.01817	0	0	0	0	-0.0735	0	0.01116	-0.00052	-0.03762	0.02549	0	0.02415	0	0.0743424	m	C34-Cd2-H34-N10-O8	0	0	equal_bothsteps	equal	0	Success at all eik	This sg doesnt have any
829	GEZSIQ_FSR	0	0	0	0	0.04669	0	0	0	0	0.07422	0	0	0.03129	0.03294	0.03085	0	0	0	0.07422	mm2	C28-Cd4-Cl4-H20-N24-S4	0	0	equal_bothsteps	equal	0	Success at all eik	This sg doesnt have any
1438	KAKTIA01_FSR	0	0	0	0.03157	0	0	0	0	0	0	0.04076	0	0	0	0	0	0	0.07409	0.07409	222	Cu8-H16-C24-N4-Cl4-O8	0	0	equal_bothsteps	equal	0	Success at all eik	This sg doesnt have any
1058	EGEBIC_FSR	0	0	0	0.06012	0	0	0	0	0	0	0.07401	0	0	0	0	0	0	0.04716	0.07401	222	Zn4-H20-C12-S4-N4-O8	0	0	equal_bothsteps	equal	0	Success at all eik	This sg doesnt have any
458	MINQAC_FSR	0	0	0	0.00263	0	-0.02365	-0.01876	0.059	0.03199	0	0.02492	0	0	0	0	0.05196	0	0.00538	0.0740088	2	Li2-H10-C4-N12-O6	0	0	equal_bothsteps	equal	0	Success at all eik	This sg doesnt have any
776	BODXOK_FSR	0	0	0	0	-0.01041	0	0	0	0	0.00687	0	0	-0.02757	-0.01931	0.06582	0	0	0	0.0739274	mm2	C44-Cd2-H36-N8-O8	0	0	equal_bothsteps	equal	0	Success at all eik	This sg doesnt have any
1260	XUZHOR_FSR	0	0	0	0	-0.00237	0	0	0	0	-0.0739	0	0	-0.00673	0.00455	0.05968	0	0	0	0.0739	mm2	Cu2-H22-C18-I2-N12	0	2	notequal_bothsteps	equal	0	Success at all eik	This sg doesnt have any
232	IXIPIQ_FSR	0	0	0	0	0.02812	0	0	0	0	0.07382	0	0	0.00735	0.03109	0.04348	0	0	0	0.07382	mm2	Hg4-H36-C48-Br8-N12	0	0	equal_bothsteps	equal	0	Success at all eik	This sg doesnt have any
102	DORFOG_FSR	0	0	0	-0.00186	0.03567	0	0	0	0	0.03567	0.00186	0	0.03657	0.03657	-0.05249	0	0	0	0.0736881	4	Mg4-H32-C16-O28	0	0	equal_bothsteps	equal	0	Success at all eik	Success at all eik
279	REDMUL_FSR	-0.00825	0.00037	0.00113	0	-0.04523	0	0	0	0	0.03375	0	0.00362	-0.05312	0.02285	0.04425	0	-0.0028	0	0.0736687	m	C78-H48-O12-P2-Y2	0	0	equal_bothsteps	equal	0	Success at all eik	This sg doesnt have any
1013	UGENAX_FSR	-0.0011	0.0302	-0.03288	0	-0.0008	0	0	0	0	0.01858	0	0.07128	-0.01065	0.0117	0.0113	0	-0.04051	0	0.0736618	m	Zn2-H24-C32-N20-O8	0	0	equal_bothsteps	equal	0	Success at all eik	This sg doesnt have any
1224	XISDEJ01_FSR	0	0	0	-0.04898	0	-0.00584	0.00927	0.00885	-0.05505	0	-0.04576	0	0	0	0	-0.02888	0	-0.05954	0.0736146	2	Cu2-H26-C22-N2-O12	2	2	equal_bothsteps	equal	2	Success at all eik	This sg doesnt have any
977	RIFQUU_FSR	0	0	0	-0.02971	0	-0.02456	-0.03966	-0.01142	0.05043	0	-0.03395	0	0	0	0	0.06176	0	-0.0354	0.0734787	2	Zn2-H20-C12-S2-N4-O14	0	0	equal_bothsteps	equal	0	Success at all eik	This sg doesnt have any
24	OCORIK01_FSR	0	0	0	0	0.00906	0	0	0	0	-0.05099	0	0	0.01486	-0.04173	-0.05855	0	0	0	0.0734188	mm2	Cs4-H28-C24-O28	0	0	equal_bothsteps	equal	0	Success at all eik	This sg doesnt have any
906	QUVGUK_FSR	0	0	0	-0.01169	0.03959	0	0	0	0	-0.03959	-0.01169	0	0.03911	-0.03911	0	0	0	0.04781	0.0731094	-4	Cd1-Co2-H16-C12-N4-O16	0	0	equal_bothsteps	equal	0	Success at all eik	Success at all eik
578	GELVEZ01_FSR	0.05099	-0.05099	0	-0.01153	0	0	0	0	0	0	0.01152	-0.05099	0	0	0	0	0	0	0.0730267	32	Mn6-H24-C42-O30	30	30	equal_bothsteps	equal	30	Success at all eik	Success at all eik
1390	QUCVIU_FSR	0	0	0	-0.02157	0	-0.02205	0.03306	-0.04694	-0.03749	0	-0.02486	0	0	0	0	-0.04067	0	-0.02611	0.0729373	2	Cu4-H18-C28-S4-N10	0	0	equal_bothsteps	equal	0	Success at all eik	This sg doesnt have any
329	JUYVOO_FSR	-0.04195	0.04195	0	0.04221	0	0	0	0	0	0	-0.04218	0.04195	0	0	0	0	0	0	0.07281	32	Bi6-H18-C24-O30	0	0	equal_bothsteps	equal	0	Success at all eik	Success at all eik
1330	MUSDUA_FSR	0.00965	-0.05568	-0.02572	0	-0.00493	0	0	0	0	-0.02051	0	-0.00108	0.02373	0.02972	0.02413	0	0.01193	0	0.0727805	m	C48-Cu2-H40-N4-O18	2	2	equal_bothsteps	equal	2	Success at all eik	This sg doesnt have any
398	WOCGAY_FSR	0	0	0	0	-0.02486	0	0	0	0	0.04277	0	0	-0.04662	0.05574	0.00406	0	0	0	0.0727795	mm2	Cs4-H28-C32-O12	0	0	equal_bothsteps	equal	0	Success at all eik	This sg doesnt have any
567	VIDNII_FSR	0	0	0	0.01632	0	-0.06532	-0.03514	0.02216	0.00989	0	0.02859	0	0	0	0	-0.01212	0	0.02524	0.0727306	2	Mn2-H30-C48-N4-O10	10	10	equal_bothsteps	notequal	0	Success at all eik	This sg doesnt have any
1295	IPUXIB_FSR	0	0	0	0.02483	0	0.03121	0.00475	-0.0718	0.00282	0	0.00868	0	0	0	0	-0.00302	0	0.04201	0.0725334	2	Cu2-H32-C24-N12-O14	0	2	notequal_bothsteps	equal	0	Success at all eik	This sg doesnt have any
67	IYUCIP_FSR	0	0	0	-0.01063	0	-0.04357	-0.03739	0.0554	-0.02711	0	0.00726	0	0	0	0	-0.0594	0	-0.00589	0.0724902	2	C11-Cl4-H16-K2-N2-O8-Zn2	0	0	equal_bothsteps	equal	0	Success at all eik	This sg doesnt have any
397	LECYAW_FSR	0.04394	-0.02454	0.00543	0	-0.03925	0	0	0	0	0.00626	0	-0.01884	-0.02456	-0.00457	-0.02927	0	0.02115	0	0.0724817	m	C40-H36-Hg2-I4-N8-O4	0	0	equal_bothsteps	equal	0	Success at all eik	This sg doesnt have any
816	TUMGAJ_FSR	0	0	0	0.07247	0	0	0	0	0	0	0.03299	0	0	0	0	0	0	0.05967	0.07247	222	Cd4-H44-C24-N4-Cl8-O8	0	0	equal_bothsteps	equal	0	Success at all eik	This sg doesnt have any
1366	YIPQAS_FSR	0	0	0	-0.07039	0	-0.00998	-0.03138	-0.00671	0.01889	0	-0.04552	0	0	0	0	-0.01001	0	-0.0183	0.072242	2	Cu4-H20-C28-S2-I4-N4-O2	0	0	equal_bothsteps	equal	0	Success at all eik	This sg doesnt have any
716	DUWWOH03_FSR	0.03069	-0.01379	0.01036	0	-0.0466	0	0	0	0	0.02061	0	-0.01166	-0.02402	0.01864	-0.00238	0	0.03081	0	0.0722249	m	Sn8-H72-C32-O20	0	0	equal_bothsteps	equal	0	Success at all eik	This sg doesnt have any
98	XEFKUR_FSR	0	0	0	0.00547	0	-0.01193	0.01653	-0.06086	0.02948	0	0.01911	0	0	0	0	0.01851	0	-0.00546	0.0721903	2	Li2-B2-H28-C32-O14	0	0	equal_bothsteps	equal	0	Success at all eik	This sg doesnt have any
792	GEDLEI_FSR	-0.00569	-0.03199	0.03916	0	-0.01459	0	0	0	0	0.00865	0	-0.0416	-0.02669	-0.00509	0.04332	0	0.04228	0	0.0721793	m	Cd2-H44-C60-N16-O8	0	0	equal_bothsteps	equal	0	Success at all eik	This sg doesnt have any
305	KEKREA_FSR	0	0	0	0.04817	0	0.00943	0.02251	0.02366	-0.04905	0	0.04153	0	0	0	0	-0.01875	0	-0.00812	0.0720912	2	Ca2-H24-C28-N4-O16	0	0	equal_bothsteps	equal	0	Success at all eik	This sg doesnt have any
512	PIHSAB_FSR	0	0	0	-0.03184	0	0	0	0	0	0	-0.07206	0	0	0	0	0	0	-0.01591	0.07206	222	C8-H8-Mg2-O12	0	0	equal_bothsteps	equal	0	Success at all eik	This sg doesnt have any
610	NARSUW_FSR	-0.05062	-0.00863	0.03562	0	-0.00276	0	0	0	0	-0.03807	0	-0.00066	-0.00736	-0.04671	0.01683	0	0.03717	0	0.0719697	m	C60-H44-N12-Ni2-O8	4	4	equal_bothsteps	equal	4	Success at all eik	This sg doesnt have any
1033	PABRIU_FSR	0	0	0	0	-0.01146	0	0	0	0	0.02441	0	0	-0.02283	-0.02454	0.06362	0	0	0	0.0719091	mm2	C24-H16-N4-O8-Zn2	0	0	equal_bothsteps	equal	0	Success at all eik	This sg doesnt have any
692	XOBGOK_FSR	0	0	0	-0.07189	0	0	0	0	0	0	-0.05375	0	0	0	0	0	0	-0.0615	0.07189	222	Tl4-B4-H24-C16-N24	0	0	equal_bothsteps	equal	0	Success at all eik	This sg doesnt have any
624	FIFPAM_FSR	0.03046	0.00206	-0.02993	0	0.02964	0	0	0	0	-0.00982	0	-0.0141	0.04669	-0.01184	-0.01883	0	0.01381	0	0.0718188	m	C24-H24-N4-Ni2-O10	4	4	equal_bothsteps	equal	4	Success at all eik	This sg doesnt have any
1241	PASQUX_FSR	0.06148	0.00632	-0.03057	0	-0.00753	0	0	0	0	-0.01869	0	0.02101	0.0089	0.01517	-0.01796	0	-0.00684	0	0.0718077	m	C24-Cu2-H20-N4-O12	0	0	equal_bothsteps	equal	0	Success at all eik	This sg doesnt have any
1455	QUFBUP_FSR	0	0	0	0	-0.00429	0	0	0	0	0.03193	0	0	-0.00327	0.05409	0.04693	0	0	0	0.0716857	mm2	C56-Cu4-F16-H32-N8-O16	0	4	notequal_bothsteps	equal	0	Success at all eik	This sg doesnt have any
1317	SAFGEN_FSR	0	0	0	-0.05966	0	0	0	0	0	0	-0.07159	0	0	0	0	0	0	-0.03448	0.07159	222	K6-Cu2-P2-H32-C20-N4-O24	2	2	equal_bothsteps	equal	2	Success at all eik	This sg doesnt have any
1204	LIWXIZ_FSR	0	0	0	-0.03052	0	0.00985	0.01117	-0.04352	0.00758	0	-0.05507	0	0	0	0	-0.00543	0	-0.05546	0.0714767	2	Zn4-H40-C62-N8-O18	0	0	equal_bothsteps	equal	0	Success at all eik	This sg doesnt have any
666	WIPKAJ_FSR	0	0	0	0	-0.03516	0	0	0	0	0.06216	0	0	-0.03523	0.01038	0.06107	0	0	0	0.0712632	mm2	C40-H28-N12-O18-Pb2	0	0	equal_bothsteps	equal	0	Success at all eik	This sg doesnt have any
987	SEJNEB_FSR	0.01209	-0.01525	-0.00106	0.01602	0.00941	0.02891	0.03086	-0.04022	-0.0037	0.02597	0.01774	-0.00385	-0.0014	0.03062	-0.03333	-0.00028	-0.01181	0.00344	0.0712523	1	Zn2-H44-C38-N4-Cl4-O8	0	0	equal_bothsteps	equal	0	This sg doesnt have any	This sg doesnt have any
204	DAXDUE_FSR	-0.008	-0.01688	0.00558	0	0.01209	0	0	0	0	0.03175	0	-0.01862	0.01687	0.04058	-0.05345	0	0.00612	0	0.071175	m	Ca4-H36-C44-N12-O20	0	0	equal_bothsteps	equal	0	Success at all eik	This sg doesnt have any
1245	ICAGIE_FSR	0	0	0	-0.0286	0	-0.00872	-0.00765	-0.00184	-0.02309	0	-0.0381	0	0	0	0	-0.04512	0	-0.0482	0.071143	2	Cu2-H16-C24-N8-O4	0	2	notequal_bothsteps	equal	0	Success at all eik	This sg doesnt have any
54	VEGYAI_FSR	0	0	0	0.03911	0	0.00437	-0.00513	-0.0428	0.03938	0	-0.04048	0	0	0	0	0.03726	0	-0.04654	0.0710463	2	In4-H20-C16-O28	0	0	equal_bothsteps	equal	0	Success at all eik	This sg doesnt have any
436	DUQSEO_FSR	0	0	0	-0.03837	0	0	0	0	0	0	-0.02983	0	0	0	0	0	0	-0.07089	0.07089	222	C14-H18-La2-N20-O10	0	0	equal_bothsteps	equal	0	Success at all eik	This sg doesnt have any
1077	JAHJEK_FSR	-0.03038	0.01405	0.04652	-0.02579	0.01131	-0.01217	-0.00887	-0.00751	-0.01046	0.03347	-0.00502	0.01673	-0.01366	0.0072	0.00801	0.00544	0.01027	-0.00397	0.0708772	1	Zn2-H26-C42-N12	0	0	equal_bothsteps	equal	0	This sg doesnt have any	This sg doesnt have any
266	EXABEL_FSR	0	0	0	-0.06435	0	-0.01034	-0.02516	0.00484	-0.03069	0	-0.01338	0	0	0	0	-0.02703	0	-0.00319	0.0706225	2	Li2-H48-C46-N8-O2-F18	0	0	equal_bothsteps	equal	0	Success at all eik	This sg doesnt have any
212	NEVGIE_FSR	0	0	0	0	0.07048	0	0	0	0	0.01955	0	0	0.05138	0.00808	-0.04249	0	0	0	0.07048	mm2	Cs12-H60-C72-O12	0	0	equal_bothsteps	equal	0	Success at all eik	This sg doesnt have any
804	HOQPUZ_FSR	0	0	0	0.05604	0	0.03308	-0.01447	0.06626	9e-05	0	0.01808	0	0	0	0	0.00649	0	0.02468	0.0701902	2	Cd2-H38-C30-S4-N6-O14	0	0	equal_bothsteps	equal	0	Success at all eik	This sg doesnt have any
554	VIWFOW_FSR	0	0	0	-0.00433	0	0.06635	0.01699	0.00362	0.05013	0	-0.03596	0	0	0	0	0.02014	0	0.02255	0.0701215	2	Na2-H20-C10-N2-O10	0	0	equal_bothsteps	equal	0	Success at all eik	This sg doesnt have any
208	ABIVOY_FSR	0	0	0	0	0.03695	0	0	0	0	-0.05747	0	0	0.06712	-0.01622	-0.01186	0	0	0	0.0700631	mm2	Ba4-H48-C32-S4-O44	0	0	equal_bothsteps	equal	0	Success at all eik	This sg doesnt have any
1183	ZEKNUB_FSR	0	0	0	0	-0.02964	0	0	0	0	0.01876	0	0	-0.049	0.04385	0.02416	0	0	0	0.0700538	mm2	C64-H56-N8-O16-Zn4	0	0	equal_bothsteps	equal	0	Success at all eik	This sg doesnt have any
845	HEWWAK_FSR	0	0	0	0	-0.02619	0	0	0	0	-0.06987	0	0	0.0227	0.03399	-0.01623	0	0	0	0.06987	mm2	C32-Cd4-H16-N16-O16	0	0	equal_bothsteps	equal	0	Success at all eik	This sg doesnt have any
1377	LEBSUH02_FSR	-0.00092	0.00127	0.0002	-0.00823	-0.00052	0.02602	0.03014	-0.00541	-0.04448	7e-05	0.04414	-6e-05	0.00017	-0.00135	-0.00048	0.02818	-0.00019	-0.01775	0.0697574	2	C32-Cu2-H28-O12	0	2	notequal_bothsteps	equal	0	Success at all eik	This sg doesnt have any
1087	POYRUR_FSR	0	0	0	0.06229	0	0	0	0	0	0	0.01399	0	0	0	0	0	0	0.06973	0.06973	222	Zn4-H32-C24-O32	0	0	equal_bothsteps	equal	0	Success at all eik	This sg doesnt have any
1010	PANREC_FSR	0	0	0	0.02965	0	-0.01236	-0.01977	0.01589	0.03521	0	0.05458	0	0	0	0	0.01426	0	0.05503	0.0697285	2	Zn2-H18-C28-N2-O6	0	0	equal_bothsteps	equal	0	Success at all eik	This sg doesnt have any
850	PODJAV_FSR	0.04898	-0.04898	0	-0.00483	0	0	0	0	0	0	0.00484	-0.04898	0	0	0	0	0	0	0.0694364	32	Cd3-H24-C30-S12-N30	0	0	equal_bothsteps	equal	0	Success at all eik	Success at all eik
603	NAASCB01_FSR	0	0	0	-0.04202	0	0	0	0	0	0	-0.02596	0	0	0	0	0	0	-0.06923	0.06923	222	Na4-H28-C24-O24	0	0	equal_bothsteps	equal	0	Success at all eik	This sg doesnt have any
1187	TISLAJ_FSR	0	0	0	0	-0.06902	0	0	0	0	0.01457	0	0	-0.03925	0.03276	-0.0092	0	0	0	0.06902	mm2	Zn8-H16-C24-N24-O16	0	0	equal_bothsteps	equal	0	Success at all eik	This sg doesnt have any
1344	FODLEQ03_FSR	-0.02064	0.02064	0	0.02486	0.00503	0.00426	0.00426	-0.00426	0	0.00503	-0.02486	0.02064	0.0351	0.0351	0.04739	0	0	0	0.0686282	3	Cu3-H24-C39-N9	0	0	equal_bothsteps	equal	0	Success at all eik	Success at all eik
82	SUHHOT_FSR	0.00098	-0.00858	0.01247	0.00732	0.00018	0.02061	0.00958	-0.03264	0.01077	-0.03343	-0.04422	0.00348	0.00853	-0.02211	0.01605	-0.00277	-0.00035	0.00415	0.0686033	1	La2-H20-C12-O22	0	0	equal_bothsteps	equal	0	This sg doesnt have any	This sg doesnt have any
915	EZABEN_FSR	0	0	0	0	0.0249	0	0	0	0	-0.0109	0	0	0.02626	-0.05876	0.02345	0	0	0	0.0684998	mm2	C24-Cd6-Cl6-H40-N22-O4	0	0	equal_bothsteps	equal	0	Success at all eik	This sg doesnt have any
1417	AXEWAD_FSR	0.03248	-0.00537	-0.02314	0	-0.01679	0	0	0	0	0.01629	0	0.00661	-0.00189	0.03361	-0.05577	0	-0.00321	0	0.0684815	m	C34-Cu4-H40-I4-N8-S2	0	0	equal_bothsteps	equal	0	Success at all eik	This sg doesnt have any
521	FARCAC_FSR	0	0	0	-0.06844	0	0	0	0	0	0	-0.05279	0	0	0	0	0	0	-0.04981	0.06844	222	Mg4-H36-C16-N4-O24	0	0	equal_bothsteps	equal	0	Success at all eik	This sg doesnt have any
90	PAJFEL_FSR	0	0	0	-0.0023	0	-0.04901	-0.03962	-0.01046	0.05478	0	0.0015	0	0	0	0	0.04233	0	-0.01974	0.068427	2	C20-H26-N4-Na2-O12	0	0	equal_bothsteps	equal	0	Success at all eik	This sg doesnt have any
20	WEMJUU_FSR	0	0	0	0	0.00873	0	0	0	0	0.00473	0	0	0.00452	0.02654	-0.0627	0	0	0	0.0682356	mm2	Cs2-H26-C14-N4-O14	0	0	equal_bothsteps	equal	0	Success at all eik	This sg doesnt have any
189	GIFGIN_FSR	-0.02674	-0.0079	-0.01937	0	-0.0309	0	0	0	0	0.0181	0	0.0082	-0.01484	-0.02504	0.05702	0	-0.02301	0	0.0681463	m	C20-Cu2-H8-Hg2-N12-S8	0	2	notequal_bothsteps	equal	0	Success at all eik	This sg doesnt have any
375	SEJSUW_FSR	0	0	0	-0.00424	0	0	0	0	0	0	-0.06814	0	0	0	0	0	0	0.00643	0.06814	222	Co4-H24-C16-O24	12	12	equal_bothsteps	notequal	0	Success at all eik	This sg doesnt have any
1267	VOZQEI03_FSR	0	0	0	0.03238	0	-0.0267	0.00832	0.01238	0.0238	0	0.0032	0	0	0	0	0.02845	0	-0.04631	0.0677958	2	Cu2-H34-C30-N10-O2	2	2	equal_bothsteps	equal	2	Success at all eik	This sg doesnt have any
1018	EJINOB_FSR	0	0	0	-0.03225	0	-0.03592	-0.05143	0.04017	0.00086	0	-0.0181	0	0	0	0	0.00151	0	-0.02331	0.0677276	2	Zn2-H26-C40-N8-Cl2-O6	0	0	equal_bothsteps	equal	0	Success at all eik	This sg doesnt have any
973	CAVVAY_FSR	0	0	0	-0.02657	0	-0.02844	-0.04295	0.04384	0.01972	0	-0.02043	0	0	0	0	0.00939	0	-0.01229	0.0676233	2	Zn2-P2-H30-C34-N4-O12	0	0	equal_bothsteps	equal	0	Success at all eik	This sg doesnt have any
483	DATYOM01_FSR	0	0	0	0.0676	0	0	0	0	0	0	0.0676	0	0	0	0	0	0	0.0644	0.0676	-42m	Mn2-H32-C16-N4-O20	10	10	equal_bothsteps	equal	10	Success at all eik	Success at all eik
78	XUNTUX_FSR	0.00596	-0.03306	0.01376	0	-0.00171	0	0	0	0	0.02524	0	-0.03109	-0.00636	0.03767	-0.03772	0	0.02517	0	0.0675673	m	C12-H12-Li2-N2-O6	0	0	equal_bothsteps	equal	0	Success at all eik	This sg doesnt have any
219	EKUFUN_FSR	0	0	0	0.01398	0	-0.00706	-0.00648	0.04928	-0.04353	0	0.0136	0	0	0	0	-0.03294	0	0.00799	0.0674561	2	Co2-H48-C44-S2-N8-O14	2	2	equal_bothsteps	equal	2	Success at all eik	This sg doesnt have any
95	PARQEG_FSR	0	0	0	0.03511	0	0.01323	-0.01321	0.06503	0.00053	0	0.01186	0	0	0	0	-0.01337	0	0.01476	0.0674118	2	Na2-H40-C34-N2-O8	0	0	equal_bothsteps	equal	0	Success at all eik	This sg doesnt have any
439	ETUGUW_FSR	0	0	0	0	-0.0296	0	0	0	0	-0.04779	0	0	-0.00647	-0.04829	0.04634	0	0	0	0.0672397	mm2	Br4-C24-Cl4-H28-K4-N4-O14-S4	0	0	equal_bothsteps	equal	0	Success at all eik	This sg doesnt have any
681	JERYUA_FSR	0	0	0	0.00054	-0.04486	0	0	0	0	-0.04485	-0.00054	0	-0.02249	-0.02249	0.05917	0	0	0	0.0671766	6	Sn6-H72-C48-S6-O12	0	0	equal_bothsteps	equal	0	Success at all eik	Success at all eik
1403	SAQGAU_FSR	0.0002	-3e-05	0	-0.01532	-0.0001	-0.04287	-0.01687	0.03817	-0.05256	0.00011	-0.00198	-8e-05	-0.00015	-8e-05	-6e-05	0.00703	0	-0.01612	0.067142	2	C14-Cu1-H16-N2-O6	1	1	equal_bothsteps	equal	1	Success at all eik	This sg doesnt have any
743	UTATOA_FSR	0	0	0	-0.00497	0	0.00442	0.00519	-0.00397	-0.01112	0	-0.06585	0	0	0	0	-0.00289	0	-0.01795	0.0671012	2	C28-Cd2-H28-N8-O8	0	0	equal_bothsteps	equal	0	Success at all eik	This sg doesnt have any
392	KELLAR_FSR	0	0	0	0.02145	0	0	0	0	0	0	0.06706	0	0	0	0	0	0	0.02384	0.06706	222	Cs4-H24-Pd4-C12-N4-Cl8-O12	0	0	equal_bothsteps	equal	0	Success at all eik	This sg doesnt have any
672	GELVID01_FSR	-0.04277	0.04277	0	0.02865	0	0	0	0	0	0	-0.02865	0.04277	0	0	0	0	0	0	0.0669281	32	Ni6-H24-C42-O30	12	12	equal_bothsteps	equal	12	Success at all eik	Success at all eik
491	UNISEQ02_FSR	0.01033	-0.03153	0.0235	0	-0.042	0	0	0	0	0.03282	0	0.04756	-0.02469	0.01974	-0.006	0	-0.04908	0	0.066885	m	C8-H8-Li4-O12	0	0	equal_bothsteps	equal	0	Success at all eik	This sg doesnt have any
647	FIJROG_FSR	0	0	0	0	0.06594	0	0	0	0	-0.02695	0	0	0.05403	-0.03628	0.01477	0	0	0	0.0667355	mm2	Ni4-H56-C40-N32-O4	8	8	equal_bothsteps	notequal	0	Success at all eik	This sg doesnt have any
37	OPEMIG_FSR	0	0	0	0.05528	0	0.0354	0.05144	0.00687	0.01406	0	0.03949	0	0	0	0	-0.02932	0	0.03466	0.0667114	2	Cd2-P8-H40-C12-N4-O24	0	0	equal_bothsteps	equal	0	Success at all eik	This sg doesnt have any
139	WEHVOV_FSR	0	0	0	-0.02684	0	-0.00415	0.00311	-0.02197	0.04243	0	-0.02461	0	0	0	0	0.04546	0	-0.04577	0.0666901	2	Mn2-H32-C20-S2-O18	10	10	equal_bothsteps	equal	10	Success at all eik	This sg doesnt have any
808	JUKXIW01_FSR	-0.03869	0.04242	-0.01523	0	0.00418	0	0	0	0	0.02148	0	0.00535	-0.00205	-0.02323	0.03726	0	-0.00337	0	0.0665906	m	C32-Cd2-H24-N4-O8	0	0	equal_bothsteps	equal	0	Success at all eik	This sg doesnt have any
25	UTEYOI_FSR	1e-05	-3e-05	-6e-05	0.03563	-2e-05	-0.04604	-0.00558	-0.02888	0.03379	1e-05	0.04923	5e-05	4e-05	0	0	0.02267	-1e-05	0.04099	0.0665627	2	Br2-C34-Co2-H30-N8-O8	6	6	equal_bothsteps	equal	6	Success at all eik	This sg doesnt have any
1004	EKOFIU01_FSR	0.02613	-0.03696	0.00546	-0.00192	0.01399	0.03626	0.01724	-0.0107	-0.0224	0.00512	-0.01437	-0.03629	0.01791	-0.01725	-0.00321	-0.01157	0.00106	0.00814	0.0665144	1	Zn2-H34-C26-S2-N6-O14	0	0	equal_bothsteps	equal	0	This sg doesnt have any	This sg doesnt have any
1016	NUFPAG_FSR	0	0	0	0.01335	0	-0.04362	-0.03286	0.01868	-0.0183	0	-0.00028	0	0	0	0	-0.03444	0	0.03709	0.0664294	2	Zn2-H44-C36-N4-O14	0	0	equal_bothsteps	equal	0	Success at all eik	This sg doesnt have any
655	GELVID_FSR	0.04221	-0.04221	0	-0.02908	0	0	0	0	0	0	0.02907	-0.04221	0	0	0	0	0	0	0.0664004	32	Ni3-H12-C21-O15	6	6	equal_bothsteps	equal	6	Success at all eik	Success at all eik
110	EFOZIK_FSR	0	0	0	0	6e-05	0.04693	0.04693	-0.04693	0	6e-05	0	0	0.0093	0.0093	-0.03777	0	0	0	0.0663691	3m	C36-H24-N6-Na2-O18-Zn2	0	0	equal_bothsteps	equal	0	Success at all eik	Success at all eik
1035	UVAROZ_FSR	-0.01266	0.01866	-0.00289	0	0.01245	0	0	0	0	0.02966	0	-0.00474	-0.00978	-0.04475	0.04506	0	0.01179	0	0.066311	m	C56-H40-N4-O8-Zn2	0	0	equal_bothsteps	equal	0	Success at all eik	This sg doesnt have any
6	UYUSAJ_FSR	0	0	0	0	0.02633	0	0	0	0	0.06629	0	0	0.01243	0.03284	0.03334	0	0	0	0.06629	mm2	Ba2-C12-H16-N16-O10	0	0	equal_bothsteps	equal	0	Success at all eik	This sg doesnt have any
205	YUKBIP_FSR	0.04417	-0.04417	0	0	0.02162	0	0	0	0	0.02162	0	-0.04417	0.00884	0.00884	0.03589	0	0	0	0.0661015	3m	Al8-P12-H36-C12-O36	0	0	equal_bothsteps	equal	0	Success at all eik	Success at all eik
1300	IXIHUS01_FSR	0	0	0	0.05284	0	0	0	0	0	0	0.05284	0	0	0	0	0	0	0.06608	0.06608	-42m	Co2-Cu4-H24-C24-N16	0	6	notequal_bothsteps	equal	0	Success at all eik	Success at all eik
880	PONTET_FSR	0	0	0	0	0.02704	0	0	0	0	-0.01926	0	0	0.02118	-0.05752	0.02431	0	0	0	0.0659403	mm2	C60-Cd4-H40-O24	0	0	equal_bothsteps	equal	0	Success at all eik	This sg doesnt have any
1302	PHALCV_FSR	0	0	0	0.0059	0	0.01771	0.03687	0.05296	0.00444	0	-0.01235	0	0	0	0	-0.01759	0	-0.00215	0.0658513	2	Cu2-H16-C16-O12	0	2	notequal_bothsteps	equal	0	Success at all eik	This sg doesnt have any
519	DODGUY_FSR	0	0	0	-0.03744	0	0	0	0	0	0	-0.02871	0	0	0	0	0	0	-0.06576	0.06576	222	Li4-H32-C36-N4-O16	0	0	equal_bothsteps	equal	0	Success at all eik	This sg doesnt have any
376	MINLOM_FSR	0	0	0	0.04411	0	-0.00448	0.00894	0.02294	-0.04113	0	0.04329	0	0	0	0	-0.02905	0	0.05013	0.0657282	2	Cs2-H20-C30-N2-O8	0	0	equal_bothsteps	equal	0	Success at all eik	This sg doesnt have any
648	AHIJOQ01_FSR	0	0	0	-0.0655	0	0	0	0	0	0	0.00369	0	0	0	0	0	0	0.04743	0.0655	222	H16-Pb4-C16-O24	0	0	equal_bothsteps	equal	0	Success at all eik	This sg doesnt have any
318	HIQPEE_FSR	0	0	0	-0.05544	0	0	0	0	0	0	-0.05544	0	0	0	0	0	0	-0.06529	0.06529	-42m	Co2-H24-C20-N8	6	6	equal_bothsteps	notequal	0	Success at all eik	Success at all eik
263	LOTTEW01_FSR	-0.00144	0.00144	0	-0.01892	0.00136	-0.04412	-0.04412	0.04412	0	0.00136	0.01894	0.00144	0.00037	0.00037	0.00452	0	0	0	0.0652524	3	Mg9-H36-C63-O45	0	0	equal_bothsteps	equal	0	Success at all eik	Success at all eik
1427	JETQOP_FSR	0	0	0	0.02494	-0.01686	0	0	0	0	-0.01685	-0.02495	0	-0.01619	-0.01619	0.06106	0	0	0	0.0652116	6	Cu8-H36-C24-I2-N18	0	0	equal_bothsteps	equal	0	Success at all eik	Success at all eik
394	EBANAZ_FSR	0.0037	-0.03025	-0.00758	0	-0.01464	0	0	0	0	-0.03147	0	-0.02251	-0.01913	-0.01881	0.05852	0	-0.00849	0	0.0650156	m	K2-H8-C18-O12-F2	0	0	equal_bothsteps	equal	0	Success at all eik	This sg doesnt have any
730	BATVEA_FSR	0	0	0	0	-0.06497	0	0	0	0	0.04396	0	0	-0.03851	0.00776	0.00655	0	0	0	0.06497	mm2	C24-Cd2-H24-N4-O16	0	0	equal_bothsteps	equal	0	Success at all eik	This sg doesnt have any
1293	BIVPUU_FSR	0	0	0	-0.04848	0	-0.03615	-0.02262	-0.0135	-0.01665	0	-0.05695	0	0	0	0	0.03871	0	-0.03947	0.0649187	2	Cu2-H20-C24-N20	0	2	notequal_bothsteps	equal	0	Success at all eik	This sg doesnt have any
561	WADHAL01_FSR	0	0	0	0.06421	0	0	0	0	0	0	0.01019	0	0	0	0	0	0	0.06491	0.06491	222	Mn4-H32-C24-O32	20	20	equal_bothsteps	equal	20	Success at all eik	This sg doesnt have any
389	ABIXAM_FSR	0	0	0	-0.06375	0	0	0	0	0	0	-0.01409	0	0	0	0	0	0	-0.06488	0.06488	222	Hg2-H56-C56-I4-N4-O4	0	0	equal_bothsteps	equal	0	Success at all eik	This sg doesnt have any
371	OCACUR_FSR	0.0313	-0.02967	-0.04204	0	-0.01792	0	0	0	0	-0.05453	0	-0.03472	-0.02325	-0.02333	-0.01204	0	0.00586	0	0.0646452	m	C32-Co4-H32-N4-O20	12	12	equal_bothsteps	notequal	0	Success at all eik	This sg doesnt have any
529	NEPRUX_FSR	0	0	0	-0.04168	0	-0.04235	-0.04233	0.01788	0.00957	0	-0.03723	0	0	0	0	0.00578	0	-0.03721	0.0646275	2	Li4-H6-C12-N6-O14	0	0	equal_bothsteps	equal	0	Success at all eik	This sg doesnt have any
1291	GOKDIT_FSR	0.01201	0.03834	0.04294	0	-0.02676	0	0	0	0	0.0325	0	0.00838	-0.01484	0.0133	-0.00515	0	0.00534	0	0.0646097	m	Cu2-H16-C24-Br2-N6-O4	0	2	notequal_bothsteps	equal	0	Success at all eik	This sg doesnt have any
732	BESQEX_FSR	0	0	0	0.00192	0	-0.00281	0.0146	-0.05241	0.03061	0	-0.016	0	0	0	0	0.00531	0	-0.00767	0.0644433	2	Cd2-H12-C16-S2-N6-Cl2-O6	0	0	equal_bothsteps	equal	0	Success at all eik	This sg doesnt have any
1166	PASKUS_FSR	0	0	0	-0.06302	0	0	0	0	0	0	-0.06441	0	0	0	0	0	0	-0.05067	0.06441	222	Zn8-P8-H48-C32-N16-O28	0	0	equal_bothsteps	equal	0	Success at all eik	This sg doesnt have any
1067	TACSIB_FSR	0	0	0	0	0.0364	0	0	0	0	-0.03211	0	0	0.03922	-0.03147	-0.04022	0	0	0	0.0643911	mm2	Zn4-H28-C12-N4-Cl8-O8	0	0	equal_bothsteps	equal	0	Success at all eik	This sg doesnt have any
983	RIWSOG_FSR	-0.04112	0.01965	0.02047	-0.02525	0.00386	-0.01322	0.02261	0.00877	-0.01251	-0.00277	0.01366	0.03104	-0.00578	0.01239	-0.01081	-0.01183	0.03176	-0.0001	0.0642679	1	Zn2-H30-C22-N2-O16	0	0	equal_bothsteps	equal	0	This sg doesnt have any	This sg doesnt have any
903	CUTVET_FSR	0	0	0	0	0.049	0.00656	0.00656	-0.00656	0	0.04898	0	0	0.01503	0.01503	-0.06054	0	0	0	0.064163	3m	C48-Cd6-H36-N24-O24	0	0	equal_bothsteps	equal	0	Success at all eik	Success at all eik
327	SINKUX_FSR	0	0	0	-0.00767	0	-0.0083	0.00514	0.05704	0.01104	0	0.02657	0	0	0	0	-0.02685	0	0.01064	0.0640923	2	C20-Co2-H30-N4-O12-P2	2	2	equal_bothsteps	notequal	0	Success at all eik	This sg doesnt have any
1383	CAYDIR_FSR	0	0	0	0.05764	-0.02792	0	0	0	0	-0.02655	-0.05353	0	-0.00352	-0.00413	0.06143	0	0	-0.00032	0.0640648	4	Cu4-H32-C24-N32-O4	0	0	equal_bothsteps	equal	0	Success at all eik	Success at all eik
994	UBOBES01_FSR	0	0	0	0	0.02911	0	0	0	0	-0.02911	0	0	0.04527	-0.04527	0	0	0	0	0.0640214	-42m	Zn2-H12-C20-N4-Cl12	0	0	equal_bothsteps	equal	0	Success at all eik	Success at all eik
1113	QOXFUE_FSR	0	0	0	0.0553	0	0	0	0	0	0	0.06399	0	0	0	0	0	0	0.03855	0.06399	222	Zn4-P8-H40-C32-O16	0	0	equal_bothsteps	equal	0	Success at all eik	This sg doesnt have any
1182	NELWUY_FSR	0	0	0	0.03747	0	0.00144	0.00595	-0.02684	0.04945	0	-0.02962	0	0	0	0	0.00148	0	-0.01471	0.0638626	2	C12-H22-N4-O8-Zn1	0	0	equal_bothsteps	equal	0	Success at all eik	This sg doesnt have any
35	ZOMNUM_FSR	0	0	0	0.03101	0	0.00941	-0.02942	-0.01265	-0.00141	0	0.02737	0	0	0	0	-0.04791	0	0.0364	0.0636805	2	C14-Cr1-H18-N4-O4-Zn1	0	0	equal_bothsteps	equal	0	Success at all eik	This sg doesnt have any
1389	HODXIH_FSR	0	0	0	0.06349	0	0	0	0	0	0	-0.06349	0	0	0	0	0	0	0	0.06349	422	Cu4-H16-C20-O16	0	4	notequal_bothsteps	notequal	2	Success at all eik	Success at all eik
144	ROJSUF_FSR	0.01904	0.00606	-0.0063	0	-0.05376	0	-4e-05	2e-05	-2e-05	-0.02833	-2e-05	0.02116	-0.03492	-0.02273	0.01516	0	0.00538	-1e-05	0.0634341	m	C4-H10-O12-P2-S2-Sr2	0	0	equal_bothsteps	equal	0	Success at all eik	This sg doesnt have any
1040	HUZGEP_FSR	0	0	0	0.0208	0	-0.03641	-0.01812	-0.02688	0.05368	0	0.00917	0	0	0	0	0.00446	0	0.00093	0.0633759	2	C47-H34-N6-O9-Zn2	0	0	equal_bothsteps	equal	0	Success at all eik	This sg doesnt have any
1334	ITOZEY_FSR	0	0	0	0.02322	0	0.02059	0.00701	-0.04918	-0.03268	0	0.02181	0	0	0	0	-0.02622	0	0.00628	0.0633362	2	Cu2-P2-H30-C34-N4-O12	2	2	equal_bothsteps	equal	2	Success at all eik	This sg doesnt have any
11	NOHHEY_FSR	0	0	0	0.06325	0	0	0	0	0	0	0.04833	0	0	0	0	0	0	0.01787	0.06325	2	Ge6-H28-C12-N4-O12	0	0	equal_bothsteps	equal	0	Success at all eik	This sg doesnt have any
347	IXUCOT_FSR	0.0383	-3e-05	-0.00573	0.0002	-0.02413	-0.00019	0.00015	-0.00095	-0.00082	0.02025	-0.00084	0.0014	-0.0453	0.00083	-0.02984	-0.00039	-0.00794	2e-05	0.0631862	m	C38-Co2-H24-N8-O8	6	6	equal_bothsteps	equal	6	Success at all eik	This sg doesnt have any
273	ROFNAB_FSR	0.02399	0.03423	0.04622	-0.00921	-0.00155	-0.00326	-0.00452	0.00449	0.00359	0.00387	-0.01315	-0.00127	0.00062	-0.00031	-0.00163	-0.00034	0.00831	-0.01542	0.0631853	1	V2-H44-C56-N4-O6	0	2	notequal_bothsteps	notequal	2	This sg doesnt have any	This sg doesnt have any
843	CDACET01_FSR	0	0	0	0.05719	0	0	0	0	0	0	0.00111	0	0	0	0	0	0	0.06317	0.06317	222	Cd4-H40-C16-O24	0	0	equal_bothsteps	equal	0	Success at all eik	This sg doesnt have any
895	JOJGOG_FSR	0	0	0	0	0.03326	0	0	0	0	-0.00044	0	0	0.05179	-0.01731	-0.0317	0	0	0	0.0631406	mm2	Cd4-H32-C56-N8-O36	0	0	equal_bothsteps	equal	0	Success at all eik	This sg doesnt have any
244	JEJZAC_FSR	0	0	0	0	-0.03867	0	0	0	0	-0.01171	0	0	-0.05269	-0.03193	0.01342	0	0	0	0.0630544	mm2	Mn4-H64-C92-O32	20	20	equal_bothsteps	equal	20	Success at all eik	This sg doesnt have any
438	DURMEJ_FSR	0	0	0	0.05577	0	0	0	0	0	0	0.01288	0	0	0	0	0	0	0.06287	0.06287	222	K4-H32-C32-N4-O20	0	0	equal_bothsteps	equal	0	Success at all eik	This sg doesnt have any
508	SIKROU_FSR	-5e-05	-5e-05	3e-05	-0.05935	0	0	0	0	0	0	-0.06281	2e-05	0	0	0	0	-9e-05	-0.05237	0.0628101	222	Mg4-H36-C12-S4-N4-O28	0	0	equal_bothsteps	equal	0	Success at all eik	This sg doesnt have any
408	LECYEA_FSR	0.02356	-0.00822	0.00929	0	-0.02135	0	0	0	0	0.01694	0	-0.00864	-0.02472	0.00559	-0.04505	0	0.02117	0	0.0627046	m	C40-H36-Hg2-I4-N8-O4	0	0	equal_bothsteps	equal	0	Success at all eik	This sg doesnt have any
604	NAHSQU01_FSR	-0.00346	0.00028	0.02578	0	0.02876	0	0	0	0	0.03385	0	0.00387	-0.01247	0.0152	0.02537	0	0.03886	0	0.0625578	m	Na2-H6-C8-O10	0	0	equal_bothsteps	equal	0	Success at all eik	This sg doesnt have any
410	BESNET_FSR	0	0	0	-0.0171	0	-0.04791	-0.06079	-0.00234	0.00892	0	-0.01138	0	0	0	0	-0.01151	0	-0.00938	0.0625298	2	C36-Cl4-H32-Hg2-N4-O12	0	0	equal_bothsteps	equal	0	Success at all eik	This sg doesnt have any
734	HESMOK_FSR	-0.01995	0.02237	-0.01376	0.03489	-0.00018	0.0106	0.01249	-0.03124	0.00108	0.02513	0.03283	-0.01145	0.00104	0.01973	0.00454	-0.02783	-0.00108	0.01604	0.0625249	1	Cd2-H30-C24-N2-O16	0	0	equal_bothsteps	equal	0	This sg doesnt have any	This sg doesnt have any
920	MITREN_FSR	0	0	0	-0.00176	0	-0.01458	-0.03519	0.0428	-0.01656	0	-0.02311	0	0	0	0	0.00907	0	-0.03445	0.0622775	2	C18-Cd1-H32-N6-O8	0	0	equal_bothsteps	equal	0	Success at all eik	This sg doesnt have any
1283	ISUJEL_FSR	0	0	0	-0.02389	0	0.05412	0.00065	0.02164	0.03021	0	-0.01006	0	0	0	0	0.03266	0	-0.00438	0.0622193	2	Cu2-H8-C10-S2-N6	0	0	equal_bothsteps	equal	0	Success at all eik	This sg doesnt have any
240	RATVEP_FSR	0	0	0	0	0.03256	0	0	0	0	0.02821	0	0	0.02726	-0.04837	0.0279	0	0	0	0.0621384	mm2	Mg4-H28-C40-N12-O20	0	0	equal_bothsteps	equal	0	Success at all eik	This sg doesnt have any
236	HOYMOZ_FSR	0	0	0	0	0.0407	0	0	0	0	-0.062	0	0	0.00299	-0.00052	0.02041	0	0	0	0.062	mm2	Hg4-H36-C48-I8-Br4-N8	0	0	equal_bothsteps	equal	0	Success at all eik	This sg doesnt have any
59	HAFCUP01_FSR	0	0	0	0	-0.00304	0	0	0	0	-0.05265	0	0	-0.02838	-0.05451	-0.00753	0	0	0	0.061915	mm2	Fe2-H12-Pd2-C24-N16-F4	0	0	equal_bothsteps	equal	0	Success at all eik	This sg doesnt have any
379	MIFVII_FSR	0	0	0	0.04415	0	0.03258	0.05368	0.01637	-0.02562	0	0.00521	0	0	0	0	-0.01441	0	0.03108	0.0619116	2	C24-Co1-H28-N2-O6	3	3	equal_bothsteps	equal	3	Success at all eik	This sg doesnt have any
757	OGOWUD_FSR	0	0	0	-0.00388	0	-0.00297	0.03251	0.00642	-0.05183	0	0.00655	0	0	0	0	-0.05967	0	0.01442	0.0618657	2	Cd2-P4-H32-C26-Cl4-O18	0	0	equal_bothsteps	equal	0	Success at all eik	This sg doesnt have any
401	EBIKIK_FSR	0	0	0	-0.06167	0	0	0	0	0	0	-0.06173	0	0	0	0	0	0	-0.00899	0.06173	-42m	C48-Fe2-H40-K4-S8	8	8	equal_bothsteps	equal	8	Success at all eik	Success at all eik
531	XAMWIR_FSR	0	0	0	0.01798	0	0.05283	0.03577	0.00773	-0.04917	0	0.00606	0	0	0	0	-0.00213	0	0.01254	0.0615927	2	Na2-H28-C24-S4-N6-O22	0	0	equal_bothsteps	equal	0	Success at all eik	This sg doesnt have any
637	NENMAV_FSR	0.02076	0.00608	-0.00097	0	0.00653	0	0	0	0	-0.04974	0	-0.00785	0.02592	0.00641	-0.05262	0	0.01223	0	0.0615184	m	C32-Cl2-H34-O4-Sn2	0	0	equal_bothsteps	equal	0	Success at all eik	This sg doesnt have any
1108	XIZJAS_FSR	0	0	0	0.05808	0	0	0	0	0	0	0.05094	0	0	0	0	0	0	0.06139	0.06139	222	Zn4-P4-H36-C32-N8-O12	0	0	equal_bothsteps	equal	0	Success at all eik	This sg doesnt have any
15	KOPBIC_FSR	0.00708	0.00214	-0.00974	0	0.008	0	0	0	0	0.04772	0	-0.01518	-0.00884	0.05526	-0.02431	0	-0.00413	0	0.0613093	m	Ca2-H12-C12-N4-Cl4-O2	0	0	equal_bothsteps	equal	0	Success at all eik	This sg doesnt have any
682	GANVIC_FSR	0	0	0	0	0.00046	0	0	0	0	-0.01774	0	0	0.01234	0.04327	-0.04144	0	0	0	0.0611706	mm2	Sn4-H52-C36-N12	0	0	equal_bothsteps	equal	0	Success at all eik	This sg doesnt have any
989	IYUCOV_FSR	0	0	0	0	-0.01359	0	0	0	0	0.03348	0	0	-0.04529	-0.01406	0.03838	0	0	0	0.0610073	mm2	Zn2-H40-C22-I4-N4-O18	0	0	equal_bothsteps	equal	0	Success at all eik	This sg doesnt have any
1218	DEMVAT01_FSR	0	0	0	0	-0.00798	0	0	0	0	0.00296	0	0	-0.01962	-0.02576	0.05162	0	0	0	0.0609356	mm2	Zn4-H40-C48-N16-Cl8	0	0	equal_bothsteps	equal	0	Success at all eik	This sg doesnt have any
506	LOTSUL01_FSR	0.0426	-0.0426	0	-0.00851	0	0	0	0	0	0	0.00851	-0.0426	0	0	0	0	0	0	0.0608436	32	Mg3-H12-C21-O15	0	0	equal_bothsteps	equal	0	Success at all eik	Success at all eik
496	NIRCUO_FSR	0	0	0	0.06061	0	0	0	0	0	0	0.04232	0	0	0	0	0	0	0.03988	0.06061	222	C16-H20-Li8-O26	0	0	equal_bothsteps	equal	0	Success at all eik	This sg doesnt have any
1309	YOLBEI_FSR	0.0067	0.02192	0.01114	-0.00413	0.01585	-0.01654	0.01497	0.02539	0.03271	-0.00323	-0.0058	0.03529	0.03044	-0.03955	-0.00581	-0.00345	-0.00747	0.00997	0.0605953	1	Cu2-H24-C28-N2-Cl2-O8	0	0	equal_bothsteps	equal	0	This sg doesnt have any	This sg doesnt have any
768	REHRAY_FSR	0.02358	0.03085	-0.03678	0	0.01179	0	0	0	0	-0.02093	0	0.00361	0.00139	0.00975	0.03069	0	-0.02727	0	0.0605208	m	C26-Cd2-Cl2-H28-N10-O4	0	0	equal_bothsteps	equal	0	Success at all eik	This sg doesnt have any
588	EMOTAC_FSR	0	0	0	-8e-05	0	0.02067	0.02151	0.01829	-0.05263	0	0.00807	0	0	0	0	-0.00753	0	0.02767	0.0602681	2	Ni2-H24-C20-N4-O10	4	4	equal_bothsteps	equal	4	Success at all eik	This sg doesnt have any
788	MAXWOA_FSR	0	0	0	-0.00048	0	0.01606	0.02802	-0.01037	-0.03746	0	-0.03643	0	0	0	0	0.00674	0	-0.03271	0.0601918	2	Cd2-H46-C58-N10-O14	0	0	equal_bothsteps	equal	0	Success at all eik	This sg doesnt have any
138	SOCCUI01_FSR	0.02947	-0.02991	0.00544	0	-0.03987	0	0	0	0	-0.01469	0	-0.01526	-0.01301	0.00202	0.05063	0	-0.01402	0	0.0600692	m	C20-Cl6-H16-Mn2-N4	8	8	equal_bothsteps	equal	8	Success at all eik	This sg doesnt have any
762	NAPTAA_FSR	-0.00393	-0.00846	-0.00212	0	0.00998	0	0	0	0	-0.03786	0	-0.0049	0.00885	-0.03269	-0.04918	0	-0.00314	0	0.0600375	m	Cd2-H20-C16-N8-Cl4	0	0	equal_bothsteps	equal	0	Success at all eik	This sg doesnt have any
1180	ZOMNOG_FSR	0	0	0	-0.03045	0	-0.01623	0.00826	0.00101	0.00626	0	-0.0341	0	0	0	0	0.04456	0	-0.03704	0.0599588	2	C14-H18-N4-O4-S1-Zn1	0	0	equal_bothsteps	equal	0	Success at all eik	This sg doesnt have any
811	POGZUH_FSR	-0.01706	-0.03234	0.04094	0	-0.01976	0	0	0	0	0.02065	0	-0.03858	-0.01448	0.01452	-0.00176	0	0.02082	0	0.0598841	m	C68-Cd2-H44-N8-O8	0	0	equal_bothsteps	equal	0	Success at all eik	This sg doesnt have any
619	UKEWOX_FSR	0	0	0	-0.01488	0	0	0	0	0	0	0.05986	0	0	0	0	0	0	-0.00552	0.05986	222	C36-H32-Na2-O24-Y2	0	0	equal_bothsteps	equal	0	Success at all eik	This sg doesnt have any
499	RUTVUA_FSR	0.0396	-0.0396	0	-0.02077	0	0	0	0	0	0	0.02077	-0.0396	0	0	0	0	0	0	0.0597303	32	Mg3-H12-C24-O21	0	0	equal_bothsteps	equal	0	Success at all eik	Success at all eik
791	LIQJIE_FSR	0	0	0	0.04453	0	-0.0149	0.03058	-0.04663	-0.00394	0	0.02087	0	0	0	0	-0.01407	0	0.01434	0.0596705	2	C44-Cd2-H42-N6-O12-S2	0	0	equal_bothsteps	equal	0	Success at all eik	This sg doesnt have any
830	FODBUX_FSR	0	0	0	0.02147	0	-0.0113	-0.03167	0.04743	-0.01629	0	0.00634	0	0	0	0	-0.02151	0	0.0177	0.0596503	2	C52-Cd3-H46-N8-O14	0	0	equal_bothsteps	equal	0	Success at all eik	This sg doesnt have any
961	PODREH_FSR	0	0	0	0.00344	0	-0.00299	0.03789	0.01341	-0.03893	0	-0.02042	0	0	0	0	-0.04457	0	-0.0002	0.0595651	2	C20-H16-N20-S8-Zn2	0	0	equal_bothsteps	equal	0	Success at all eik	This sg doesnt have any
1031	KEKXAB_FSR	0	0	0	-0.0197	0	-0.03764	-0.05237	-0.01638	0.00982	0	-0.02085	0	0	0	0	-0.00121	0	-0.03032	0.0595153	2	Zn2-H38-C24-N4-Cl2-O6	0	0	equal_bothsteps	equal	0	Success at all eik	This sg doesnt have any
146	KACJAB_FSR	0	0	0	0	-0.00764	0	0	0	0	-0.00823	0	0	-0.04045	0.02757	-0.03381	0	0	0	0.0594931	mm2	C24-H20-Pd2-S4	0	0	equal_bothsteps	equal	0	Success at all eik	This sg doesnt have any
596	IWECIY_FSR	0	0	0	-0.01972	0	0.0523	0.01694	0.00086	-0.01346	0	-0.01919	0	0	0	0	0.00206	0	-0.02028	0.0592909	2	Ni2-H44-C44-N8-O18	0	0	equal_bothsteps	equal	0	Success at all eik	This sg doesnt have any
650	WARJAC_FSR	-0.04127	0.04127	0	0.00836	0	0	0	0	0	0	-0.00837	0.04127	0	0	0	0	0	1e-05	0.0589603	32	Ni9-H36-C24-N18-O42	18	18	equal_bothsteps	notequal	6	Success at all eik	Success at all eik
213	QUVHIZ_FSR	0	0	0	-0.01541	0	0.02638	0.03091	0.00025	-0.03105	0	0.03916	0	0	0	0	-0.02626	0	-0.01571	0.0587631	2	Sr2-Co4-H32-C24-N8-O32	0	0	equal_bothsteps	equal	0	Success at all eik	This sg doesnt have any
605	MUMNIR_FSR	-0.02014	0.02216	-0.01052	0	0.03579	0	0	0	0	-0.01358	0	0.02383	0.03601	-0.01856	-0.02457	0	-0.00773	0	0.0587469	m	Na4-H28-C28-N4-O10	0	0	equal_bothsteps	equal	0	Success at all eik	This sg doesnt have any
160	FOMNOM_FSR	-0.01743	-0.01517	0.0008	0.02338	-0.00574	0.008	0.02526	-0.02359	0.00963	-0.00683	0.01374	0.00546	-0.01153	0.00045	0.00737	-0.01274	0.04942	0.01987	0.0587322	1	Sn2-H40-C28-N4-O12	0	0	equal_bothsteps	equal	0	This sg doesnt have any	This sg doesnt have any
300	CEYPUT01_FSR	-0.02809	-0.01532	-0.00599	0	-0.01265	0	0	0	0	-0.02384	0	-0.01337	-0.01704	-0.02629	-0.0426	0	-0.00368	0	0.0586534	m	Co2-H16-C24-N4-O8	6	6	equal_bothsteps	equal	6	Success at all eik	This sg doesnt have any
822	DAYVEF_FSR	0	0	0	0	-0.00169	0	0	0	0	0.01989	0	0	0.01803	0.01714	-0.05305	0	0	0	0.0585932	mm2	Cd4-H40-C28-S4-N8-O20	0	0	equal_bothsteps	equal	0	Success at all eik	This sg doesnt have any
687	DOZBAX_FSR	0	0	0	-0.03636	-0.00114	0	0	0	0	0.00114	-0.03636	0	-0.0213	0.0213	0	0	0	-0.05003	0.0583985	-4	C64-H44-N8-O20-Yb4	0	0	equal_bothsteps	equal	0	Success at all eik	Success at all eik
1394	HEJCOR_FSR	-0.01436	0.00204	-0.00617	0	0.00083	0	0	0	0	-0.01572	0	0.01513	0.00876	0.03866	-0.04235	0	-0.00507	0	0.0583486	m	C56-Cu2-H40-N4-O8	2	2	equal_bothsteps	equal	2	Success at all eik	This sg doesnt have any
3	QEFZOQ_FSR	0.00112	0.02095	0.0243	0	-0.00619	0	0	0	0	-0.00362	0	0.00032	0.00591	-0.01061	0.00271	0	0.05603	0	0.0583096	m	Al2-H22-C16-S2	0	0	equal_bothsteps	equal	0	Success at all eik	This sg doesnt have any
620	BINSID_FSR	0.00127	-0.01739	-0.0065	0	0.01185	0	0	0	0	-0.05433	0	-0.02105	0.02107	-0.04188	0.0065	0	0.00937	0	0.0582654	m	C8-H10-N16-Na2-O2	0	0	equal_bothsteps	equal	0	Success at all eik	This sg doesnt have any
493	IFIVOL_FSR	0	0	0	-0.05803	0	0	0	0	0	0	-0.03205	0	0	0	0	0	0	-0.05579	0.05803	222	Li4-H56-C48-N4-O16	0	0	equal_bothsteps	equal	0	Success at all eik	This sg doesnt have any
1153	DELTAQ01_FSR	0	0	0	0.05802	0	0	0	0	0	0	-0.05802	0	0	0	0	0	0	0	0.05802	422	Zn4-H40-C48-N8-O16	0	0	equal_bothsteps	equal	0	Success at all eik	Success at all eik
1451	IZUPOI_FSR	-0.00067	0.00055	-0.00019	-0.01138	-0.01592	0.0001	0.00027	0.00039	-0.00014	0.01815	-0.01093	-0.0002	-0.03874	0.04268	0.00165	7e-05	2e-05	-0.00578	0.0579593	-4	C32-Cu4-H32-N4-O12	0	4	notequal_bothsteps	notequal	2	Success at all eik	Failed at e32
807	ABIWUF_FSR	0	0	0	-0.05276	0	0	0	0	0	0	-0.00904	0	0	0	0	0	0	-0.05795	0.05795	222	Cd2-H56-C56-I4-N4-O4	0	0	equal_bothsteps	equal	0	Success at all eik	This sg doesnt have any
196	UWEGUZ_FSR	0	0	0	0.04305	0	0.01875	0.00965	-0.01761	-0.03427	0	0.042	0	0	0	0	-0.03512	0	0.03972	0.0578072	2	C32-Cu2-H26-N4-O12-P2-S2	0	0	equal_bothsteps	equal	0	Success at all eik	This sg doesnt have any
186	AGOXAX_FSR	0	0	0	0.00258	0	0.01054	0.02676	0.04892	0.00442	0	-0.01415	0	0	0	0	-0.02678	0	-0.00904	0.0576977	2	Cu2-H20-C24-O12	0	2	notequal_bothsteps	equal	0	Success at all eik	This sg doesnt have any
1322	ASUQIO03_FSR	0	0	0	-0.03186	0	0	0	0	0	0	-0.03186	0	0	0	0	0	0	-0.05768	0.05768	-42m	C16-Cu4-H24-N12	0	0	equal_bothsteps	equal	0	Success at all eik	Success at all eik
522	MOXKUG_FSR	0	0	0	-0.04625	0.01433	0	0	0	0	-0.01433	-0.04625	0	0.03816	-0.03816	0	0	0	-0.02025	0.0576406	-4	B1-C16-H20-Li1-N8	0	0	equal_bothsteps	equal	0	Success at all eik	Success at all eik
1069	QOTZOP_FSR	0	0	0	-0.05746	0	0	0	0	0	0	-0.04023	0	0	0	0	0	0	-0.01442	0.05746	222	Zn4-H40-C32-O16	0	0	equal_bothsteps	equal	0	Success at all eik	This sg doesnt have any
10	OPOBOL_FSR	0	0	0	0	0.04216	0	0	0	0	0.04966	0	0	0.00522	-0.0019	0.05714	0	0	0	0.0574094	mm2	Ba2-C24-H20-N4-O16	0	0	equal_bothsteps	equal	0	Success at all eik	This sg doesnt have any
758	PALTOO_FSR	0	0	0	-0.0194	0	0.04103	-0.00045	0.05105	-0.02557	0	0.00232	0	0	0	0	-0.02391	0	-0.01396	0.0571447	2	C24-Cd2-H18-N18-O4	0	0	equal_bothsteps	equal	0	Success at all eik	This sg doesnt have any
537	MAKYOM02_FSR	0	0	0	-0.01625	0	-0.02768	-0.0173	0.00717	-0.0198	0	-0.02256	0	0	0	0	0.03508	0	-0.0431	0.0571148	2	C24-H16-Mo3-N4-O9	0	0	equal_bothsteps	equal	0	Success at all eik	This sg doesnt have any
1398	FAZWOS_FSR	0	0	0	-0.04676	0	0	0	0	0	0	-0.04242	0	0	0	0	0	0	-0.0571	0.0571	222	Cu4-H28-C24-N4-Cl4	0	0	equal_bothsteps	equal	0	Success at all eik	This sg doesnt have any
206	LAHWOI_FSR	0	0	0	0.03339	0	0.0076	0.01347	-0.04564	-0.0166	0	0.0266	0	0	0	0	-0.01705	0	0.04734	0.0569875	2	Bi2-H54-C48-S4-O12	0	0	equal_bothsteps	equal	0	Success at all eik	This sg doesnt have any
70	KDGLUC01_FSR	0	0	0	-0.01928	0	0.02412	0.03118	-0.03386	-0.02423	0	-0.00964	0	0	0	0	-0.0535	0	-0.00529	0.0569784	2	K2-H18-C12-O16	0	0	equal_bothsteps	equal	0	Success at all eik	This sg doesnt have any
113	NIZFEJ_FSR	0	0	0	0.03685	0	0.01169	0.00049	0.03751	0.00688	0	0.03547	0	0	0	0	0.03075	0	0.03168	0.0569425	2	Na2-P2-H32-C22-N4-O16	0	0	equal_bothsteps	equal	0	Success at all eik	This sg doesnt have any
1116	KIJSII_FSR	0	0	0	0.00029	0	0.02721	0.02836	0.03927	-0.02917	0	0.00397	0	0	0	0	-0.01609	0	0.00563	0.056684	2	Zn4-H56-C32-N8-Cl8-O8	0	0	equal_bothsteps	equal	0	Success at all eik	This sg doesnt have any
1412	EDAWOY_FSR	0	0	0	0.0565	0	0	0	0	0	0	0.03855	0	0	0	0	0	0	0.05377	0.0565	222	Cu4-P4-H64-C32-N4-O24	4	4	equal_bothsteps	equal	4	Success at all eik	This sg doesnt have any
265	OVUNID_FSR	0.03976	-0.03976	0	-0.00181	-0.00273	0.00309	0.00309	-0.00309	0	-0.00273	0.00181	-0.03976	-0.02749	-0.02749	0.01881	0	0	0	0.0564937	3	Li3-H39-C42-N18	0	0	equal_bothsteps	equal	0	Success at all eik	Success at all eik
331	RAJSIG_FSR	0	0	0	-0.03373	0	0.00333	-0.05507	-0.00622	0.00494	0	-0.00976	0	0	0	0	-0.01957	0	-0.00732	0.0564894	2	Co2-H44-C28-N4-Cl4-O2	6	6	equal_bothsteps	equal	6	Success at all eik	This sg doesnt have any
55	HAFDEA01_FSR	0	0	0	0	-0.00242	0	0	0	0	-0.04599	0	0	-0.02544	-0.05	-0.00621	0	0	0	0.0564425	mm2	Fe2-H12-Pt2-C24-N16-F4	0	0	equal_bothsteps	equal	0	Success at all eik	This sg doesnt have any
1358	KIYCIH_FSR	0	0	0	-0.03711	0	0	0	0	0	0	-0.02149	0	0	0	0	0	0	-0.05639	0.05639	222	Cu4-H12-C24-N16-O8-F4	0	4	notequal_bothsteps	equal	0	Success at all eik	This sg doesnt have any
461	DIKRUL_FSR	0	0	0	-0.03703	0	0	0	0	0	0	-0.00824	0	0	0	0	0	0	-0.05635	0.05635	222	K8-B4-H20-C16-O28	0	0	equal_bothsteps	equal	0	Success at all eik	This sg doesnt have any
592	RESSAK_FSR	0	0	0	0.03934	0	0.03915	0.0059	-0.02992	-0.01714	0	0.02221	0	0	0	0	0.00043	0	0.01274	0.0562922	2	C36-H26-N4-Ni2-O10-S1	4	4	equal_bothsteps	equal	4	Success at all eik	This sg doesnt have any
996	UBOBIW01_FSR	0	0	0	0	0.02799	0	0	0	0	-0.02799	0	0	0.03976	-0.03976	0	0	0	0	0.0562291	-42m	Zn2-H12-C20-Br8-N4-Cl4	0	0	equal_bothsteps	equal	0	Success at all eik	Success at all eik
1435	CEPGEJ_FSR	0	0	0	0	0.05622	0	0	0	0	-0.01084	0	0	-0.003	-0.00176	0.00381	0	0	0	0.05622	mm2	C40-Cu4-H40-I4-N16	0	0	equal_bothsteps	equal	0	Success at all eik	This sg doesnt have any
1106	ASALIP_FSR	0	0	0	0.04995	0	0	0	0	0	0	0.04649	0	0	0	0	0	0	0.05608	0.05608	222	Zn4-H36-C32-N12-O20	0	0	equal_bothsteps	equal	0	Success at all eik	This sg doesnt have any
495	UNIRUF01_FSR	0	0	0	-0.05576	0	0	0	0	0	0	-0.02771	0	0	0	0	0	0	-0.00215	0.05576	222	C8-H8-Li4-O12	0	0	equal_bothsteps	equal	0	Success at all eik	This sg doesnt have any
387	YITPUM_FSR	0	0	0	0.00207	0	0.02835	0.0353	-0.04265	0.00388	0	0.00461	0	0	0	0	0.01211	0	0.00602	0.0556904	2	C11-Cl8-H22-Hg4-N2-O4	0	0	equal_bothsteps	equal	0	Success at all eik	This sg doesnt have any
1341	EPOZIU_FSR	0	0	0	-0.00389	0	0	0	0	0	0	-0.05567	0	0	0	0	0	0	0.02072	0.05567	222	Cu4-H40-C24-N8-O16	0	4	notequal_bothsteps	equal	0	Success at all eik	This sg doesnt have any
362	RIWVAV_FSR	-0.00497	-0.02447	0.00306	0	-0.02625	0	0	0	0	0.02133	0	-0.02177	-0.03202	0.03348	-0.00851	0	0.01466	0	0.0555368	m	C44-Co2-H36-N8-O8	6	6	equal_bothsteps	equal	6	Success at all eik	This sg doesnt have any
615	POPVIC_FSR	0.04177	-0.00044	0.01251	0	-0.01696	0	0	0	0	-0.00231	0	0.00401	-0.0287	-0.02454	0.00171	0	0.00272	0	0.0555199	m	C56-H40-N4-Ni2-O8	4	4	equal_bothsteps	equal	4	Success at all eik	This sg doesnt have any
697	NIHFOA_FSR	0	0	0	-0.03585	0	0	0	0	0	0	-0.05548	0	0	0	0	0	0	-0.05303	0.05548	222	Tl4-H56-C40-S4-N4-O8	0	0	equal_bothsteps	equal	0	Success at all eik	This sg doesnt have any
644	YERZIF_FSR	0.01473	0.01514	-0.00692	0	0.02187	0	0	0	0	-0.04624	0	0.00182	0.02802	-0.00067	-0.04505	0	0.00052	0	0.0553787	m	C32-Cl4-H32-O4-Sn2	0	0	equal_bothsteps	equal	0	Success at all eik	This sg doesnt have any
1450	OVAZOB_FSR	0	0	0	-0.00513	0	0	0	0	0	0	-0.05518	0	0	0	0	0	0	-0.04686	0.05518	222	Cu4-H48-C44-N12-O16	4	4	equal_bothsteps	equal	4	Success at all eik	This sg doesnt have any
119	LESJID_FSR	0	0	0	0	0.05503	0	0	0	0	-0.01592	0	0	0.02423	0.00014	-0.00386	0	0	0	0.05503	mm2	C20-Cl4-H20-N4-Pb2	0	0	equal_bothsteps	equal	0	Success at all eik	This sg doesnt have any
203	NEBQES_FSR	0	0	0	0	-0.04244	0	0	0	0	0.02823	0	0	-0.04631	0.01975	-0.02194	0	0	0	0.0549185	mm2	Ba4-H40-C48-N16-O40	0	0	equal_bothsteps	equal	0	Success at all eik	This sg doesnt have any
143	UYURUC_FSR	0	0	0	0	-0.01631	0	0	0	0	-0.05489	0	0	-0.0047	-0.02269	-0.03986	0	0	0	0.05489	mm2	C12-H16-N16-O10-Sr2	0	0	equal_bothsteps	equal	0	Success at all eik	This sg doesnt have any
696	NOZKIW_FSR	0	0	0	0.05485	0	0	0	0	0	0	0.05485	0	0	0	0	0	0	0.00591	0.05485	-42m	Sr2-P4-H24-C8-O16	0	0	equal_bothsteps	equal	0	Success at all eik	Success at all eik
418	TELMOO01_FSR	0	0	0	0.01371	0	-0.03115	-0.03749	0.034	-0.00082	0	0.021	0	0	0	0	0.01607	0	0.0152	0.0548012	2	K2-H20-C30-N2-O10	0	0	equal_bothsteps	equal	0	Success at all eik	This sg doesnt have any
974	LUPCIK_FSR	0	0	0	0	0.01636	0	0	0	0	-0.04281	0	0	0.02363	-0.0037	-0.0491	0	0	0	0.0546157	mm2	C24-F4-H12-N4-O8-Zn2	0	0	equal_bothsteps	equal	0	Success at all eik	This sg doesnt have any
1103	NOQHUY_FSR	-0.00502	0.01753	0.00068	0	0.03122	0	0	0	0	-0.02234	0	0.01551	0.03313	-0.02916	0.01656	0	-0.0113	0	0.0545276	m	C44-H36-N8-O8-Zn2	0	0	equal_bothsteps	equal	0	Success at all eik	This sg doesnt have any
17	QEHJIX_FSR	0	0	0	-0.03457	0	-0.03659	-0.03113	0.03008	0.02327	0	-0.0234	0	0	0	0	0.01509	0	-0.01733	0.0544329	2	Ba2-H20-C20-O14	0	0	equal_bothsteps	equal	0	Success at all eik	This sg doesnt have any
157	FIRZAJ_FSR	0	0	0	-0.00567	0	-0.00463	-0.01988	0.00428	0.02029	0	-0.04613	0	0	0	0	0.01764	0	-0.05142	0.0544219	2	Mn4-H20-C16-O26	20	20	equal_bothsteps	equal	20	Success at all eik	This sg doesnt have any
798	LIDZAB_FSR	0	0	0	0.00098	0	0.05415	0.04464	-9e-05	-0.02042	0	0.0063	0	0	0	0	-0.02075	0	0.00424	0.0543202	2	Cd2-H40-C36-N16-O8	0	0	equal_bothsteps	equal	0	Success at all eik	This sg doesnt have any
1170	MIHHOB_FSR	0	0	0	0.0482	0	0	0	0	0	0	0.03938	0	0	0	0	0	0	0.05404	0.05404	222	Zn4-H32-C48-N24	0	0	equal_bothsteps	equal	0	Success at all eik	This sg doesnt have any
1414	CIBRIR_FSR	-0.0001	-0.00011	-2e-05	0.03817	-4e-05	-0.03817	-0.03277	0.02452	0.0198	4e-05	0.02907	2e-05	-4e-05	4e-05	3e-05	0.02821	7e-05	0.02914	0.0539905	2	C32-Cl2-Cu1-H32-N4-O2	1	1	equal_bothsteps	equal	1	Success at all eik	This sg doesnt have any
527	BERROH_FSR	-0.01221	0.02964	-0.0355	0	-0.0242	0	0	0	0	0.01896	0	-0.01283	-0.00628	-0.00371	0.01418	0	-0.01219	0	0.0538231	m	C16-H24-Mn2-N20-O4	10	10	equal_bothsteps	equal	10	Success at all eik	This sg doesnt have any
517	MISKUX_FSR	0	0	0	0.05382	0	0	0	0	0	0	0.02525	0	0	0	0	0	0	0.01506	0.05382	222	Li4-H36-C20-Br4-N4-O8	0	0	equal_bothsteps	equal	0	Success at all eik	This sg doesnt have any
1088	SIYSAV_FSR	0	0	0	-0.05382	0	0	0	0	0	0	-0.04226	0	0	0	0	0	0	-0.05049	0.05382	222	Zn4-H32-C28-N4-Cl4-O4	0	0	equal_bothsteps	equal	0	Success at all eik	This sg doesnt have any
1354	JABYUH01_FSR	0	0	0	-0.00936	0	0	0	0	0	0	0.05373	0	0	0	0	0	0	0.01311	0.05373	222	Cu4-H48-C28-N8-O12	4	4	equal_bothsteps	equal	4	Success at all eik	This sg doesnt have any
247	RIWFUA_FSR	0	0	0	-0.00787	0	-0.01015	-0.03432	0.00281	0.03191	0	-0.02599	0	0	0	0	0.01103	0	0.01266	0.0536608	2	Mn2-H60-C52-N4-Cl4-O4	0	10	notequal_bothsteps	equal	0	Success at all eik	This sg doesnt have any
1154	QICTEC_FSR	0	0	0	0	0.01951	0	0	0	0	0.01951	0	0	0.02136	0.02136	-0.04433	0	0	0	0.0536437	4mm	Zn8-H40-C12-S8-N4-O32	0	0	equal_bothsteps	equal	0	Success at all eik	Success at all eik
1345	ALIFOR01_FSR	0	0	0	0.02507	0	-0.03006	-0.03246	0.0098	0.01791	0	0.00888	0	0	0	0	0.0459	0	0.00533	0.0535635	2	Cu4-H40-C24-N4-Cl4-O2	0	0	equal_bothsteps	equal	0	Success at all eik	This sg doesnt have any
849	EDABAO_FSR	0	0	0	0	0.02487	0	0	0	0	-0.04174	0	0	0.04068	-0.03414	0.00692	0	0	0	0.0535564	mm2	Cd4-H16-C24-I4-N4-O8	0	0	equal_bothsteps	equal	0	Success at all eik	This sg doesnt have any
516	HEFXAR_FSR	0	0	0	0.05353	0	0	0	0	0	0	0.0505	0	0	0	0	0	0	0.02434	0.05353	222	Li4-H16-C8-N4-O8	0	0	equal_bothsteps	equal	0	Success at all eik	This sg doesnt have any
1168	EKEHUZ_FSR	0.03773	-0.03773	0	0.00221	0	0	0	0	0	0	-0.00221	-0.03773	0	0	0	0	0	0	0.053404	32	Zn6-P6-H42-C18-N6-O18	0	0	equal_bothsteps	equal	0	Success at all eik	Success at all eik
867	JAGNEN_FSR	-0.00319	0.01421	-0.00789	0.03087	-0.01887	0.00053	0.01142	-0.00343	0.00223	0.00168	0.02962	0.02352	0.00268	0.01174	-0.00643	0.02	-0.01877	0.0164	0.0533908	1	Cd4-H40-C44-N4-O20	0	0	equal_bothsteps	equal	0	This sg doesnt have any	This sg doesnt have any
514	MISKAD_FSR	0	0	0	0.05333	0	0	0	0	0	0	0.02338	0	0	0	0	0	0	0.02022	0.05333	222	Li4-H36-C20-I4-N4-O8	0	0	equal_bothsteps	equal	0	Success at all eik	This sg doesnt have any
900	EMOTIK_FSR	0	0	0	-0.02048	0	0	0	0	0	0	0.05326	0	0	0	0	0	0	0.00986	0.05326	222	Cd4-H48-C44-N8-O16	0	0	equal_bothsteps	equal	0	Success at all eik	This sg doesnt have any
642	ESOMAC_FSR	0	0	0	-0.05025	0	-0.00048	-0.02884	0.02076	-0.01329	0	-0.02699	0	0	0	0	-0.01589	0	-0.01752	0.0530477	2	Sn2-H62-C50-N2-O6	0	0	equal_bothsteps	equal	0	Success at all eik	This sg doesnt have any
581	BEHWIU_FSR	0	0	0	-0.01974	0	0.03604	0.035	0.01571	-0.03331	0	-0.01452	0	0	0	0	-0.02547	0	-0.01874	0.0528412	2	Na2-H42-C46-S2-N4-O12	0	0	equal_bothsteps	equal	0	Success at all eik	This sg doesnt have any
766	VOQBUZ_FSR	0	0	0	-0.05284	0	0	0	0	0	0	0.05284	0	0	0	0	0	0	0	0.05284	422	C24-Cd2-H20-N4-O8	0	0	equal_bothsteps	equal	0	Success at all eik	Success at all eik
476	EMUDAT_FSR	0	0	0	-0.04874	0	0	0	0	0	0	-0.04873	0	0	0	0	0	0	-0.05266	0.05266	-42m	C56-H40-La4-N8-O40-Sr2	0	0	equal_bothsteps	equal	0	Success at all eik	Success at all eik
594	UFATEA01_FSR	0	0	0	0	-0.02189	0	0	0	0	-0.04721	0	0	-0.02395	-0.02928	-0.03662	0	0	0	0.0526493	mm2	Ni2-H16-C24-N4-O8	4	4	equal_bothsteps	equal	4	Success at all eik	This sg doesnt have any
951	TAPREK_FSR	0	0	0	0.03854	0	0.01663	0.03313	0.017	0.00778	0	0.03631	0	0	0	0	0.01202	0	0.03345	0.0525884	2	Zn2-H28-C28-O14	0	0	equal_bothsteps	equal	0	Success at all eik	This sg doesnt have any
1071	WISZON_FSR	0.02308	-0.02308	0	-0.02741	0.02894	0.00715	0.00715	-0.00715	0	0.02894	0.02741	-0.02308	0.00114	0.00114	-0.01972	0	0	0	0.0525019	3	Zn3-H33-C30-N3-O12	0	0	equal_bothsteps	equal	0	Success at all eik	Success at all eik
1098	SIVGIP_FSR	-0.02151	0.02233	0.00118	0	-0.00196	0	0	0	0	-0.01656	0	0.02748	-0.00145	-0.03057	0.0386	0	0.00947	0	0.0523122	m	C8-H12-N16-Zn2	0	0	equal_bothsteps	equal	0	Success at all eik	This sg doesnt have any
1118	KEKLIY_FSR	0	0	0	-0.05215	0	0	0	0	0	0	-0.00732	0	0	0	0	0	0	0.00586	0.05215	222	Zn4-P4-H24-C12-N4-O24	0	0	equal_bothsteps	equal	0	Success at all eik	This sg doesnt have any
295	YIZVEJ_FSR	0	0	0	0.02115	0	0.02028	0.00162	0.00519	0.0075	0	-0.0014	0	0	0	0	-0.0459	0	0.02132	0.0521279	2	Bi2-H24-C36-N6-O12	0	0	equal_bothsteps	equal	0	Success at all eik	This sg doesnt have any
502	PEKCOX01_FSR	0	0	0	0.03137	0	0	0	0	0	0	0.03976	0	0	0	0	0	0	0.05204	0.05204	222	Li4-H32-C20-N4-O16	0	0	equal_bothsteps	equal	0	Success at all eik	This sg doesnt have any
1452	NUZZEN_FSR	-0.01266	0.0212	-0.01137	0.02616	-0.02181	0.01745	0.0129	-0.02707	0.00271	0.00171	0.00958	0.01877	-0.02186	0.00125	-0.00081	-0.0021	-0.00532	0.01511	0.0520323	1	K2-Cu1-H47-C35-N7-O9	1	1	equal_bothsteps	equal	1	This sg doesnt have any	This sg doesnt have any
1095	BUBCOS_FSR	0	0	0	-0.03528	0	-0.00564	0.01316	-0.00609	-0.00062	0	-0.02887	0	0	0	0	-0.02703	0	-0.03272	0.0520275	2	C24-H30-N4-O16-P4-Zn3	0	0	equal_bothsteps	equal	0	Success at all eik	This sg doesnt have any
652	DAWCAH_FSR	0	0	0	-0.0371	0	0	0	0	0	0	0.00361	0	0	0	0	0	0	-0.05197	0.05197	222	Ni4-H32-C40-N4-O20	4	0	notequal_bothsteps	equal	4	Success at all eik	This sg doesnt have any
5	TEKRIM_FSR	0	0	0	-0.00382	0	0.01053	0.02335	0.03841	-0.02246	0	-0.01286	0	0	0	0	0.00901	0	0.01354	0.0518689	2	C34-Ca1-H28-N2-O8-P2	0	0	equal_bothsteps	equal	0	Success at all eik	This sg doesnt have any
278	BUBSOI_FSR	0	0	0	0.0286	0	0.009	-0.01747	-0.00631	0.02949	0	0.03834	0	0	0	0	-0.00062	0	0.0297	0.0518134	2	Sn2-H52-C54-S2-N4-O8	0	0	equal_bothsteps	equal	0	Success at all eik	This sg doesnt have any
73	UKUFAH_FSR	0	0	0	-0.01941	0	0.0311	0.04896	-0.00301	-0.00939	0	-0.01317	0	0	0	0	0.01659	0	-0.00631	0.0516504	2	K2-H34-C24-O2	0	0	equal_bothsteps	equal	0	Success at all eik	This sg doesnt have any
481	MUQWIG_FSR	0	0	0	0.00114	0	0	0	0	0	0	-0.05165	0	0	0	0	0	0	0.01963	0.05165	222	Li4-H36-C56-O20	0	0	equal_bothsteps	equal	0	Success at all eik	This sg doesnt have any
1201	QEYZAY01_FSR	0	0	0	0.00025	0	-0.01009	-0.01494	0.04056	-0.00822	0	0.02683	0	0	0	0	0.0368	0	0.00215	0.0515338	2	C22-H26-N4-O8-Zn1	0	0	equal_bothsteps	equal	0	Success at all eik	This sg doesnt have any
338	AXUVUL_FSR	0	0	0	0.02125	0	0	0	0	0	0	0.05153	0	0	0	0	0	0	0.04063	0.05153	222	Sb4-H52-C24-N4-O8-F12	0	0	equal_bothsteps	equal	0	Success at all eik	This sg doesnt have any
1120	LIFNAR_FSR	-0.02989	0.03805	-0.01673	0	-0.00286	0	0	0	0	0.00396	0	-0.00465	-0.00178	0.0073	0.00741	0	-0.00086	0	0.0514451	m	C46-H34-N6-O8-Zn2	0	0	equal_bothsteps	equal	0	Success at all eik	This sg doesnt have any
243	MOZCEL_FSR	-0.01077	0.01202	0.00084	0.00399	0.00564	-0.00303	0.00273	-0.00237	-0.00116	-0.01894	-0.00373	-0.00414	0.01897	-0.02193	0.03933	-0.00236	-0.01127	-0.00151	0.0514406	m	C50-H40-N4-Ni2-O14	0	0	equal_bothsteps	equal	0	Failed at e36	This sg doesnt have any
323	SCNTAD_FSR	0	0	0	0.05144	0	0	0	0	0	0	0.05144	0	0	0	0	0	0	0.05144	0.05144	23	Na4-Ca4-H24-C24-N4-O24	0	0	equal_bothsteps	equal	0	Success at all eik	Success at all eik
44	GOFNEV_FSR	0	0	0	0	0.00736	0	0	0	0	0.03893	0	0	0.03093	0.04008	0.00906	0	0	0	0.0514311	mm2	C16-Cd2-H12-N24	0	0	equal_bothsteps	equal	0	Success at all eik	This sg doesnt have any
645	JATKIB_FSR	-0.00997	0.01807	-0.005	-0.01635	-0.00721	0.00184	-0.01024	-0.00875	0.0172	-0.02407	-0.00214	-0.02316	0.00217	0.01523	-0.02085	0.0096	-0.0104	0.02016	0.0513724	1	Sn2-H28-C12-O6	0	0	equal_bothsteps	equal	0	This sg doesnt have any	This sg doesnt have any
1379	KEPSEE_FSR	0	0	0	0.01799	0	0.00232	-0.03149	0.01013	0.03572	0	-0.01603	0	0	0	0	0.01776	0	0.00676	0.0512554	2	Cu2-H36-C36-N4-O6	0	2	notequal_bothsteps	equal	0	Success at all eik	This sg doesnt have any
790	NOQDII_FSR	-0.01244	0.01233	-0.01755	0	-0.02694	0	0	0	0	0.00129	0	0.01707	-0.04073	-3e-05	0.03016	0	0.00538	0	0.0511816	m	C50-Cd2-H36-N12-O12-S2	0	0	equal_bothsteps	equal	0	Success at all eik	This sg doesnt have any
1056	XOVXIQ_FSR	0	0	0	-0.00054	0	-0.03642	-0.02771	-0.03641	0.02278	0	0.00192	0	0	0	0	0.01512	0	-0.01248	0.0511483	2	Zn2-H34-C42-N10-O10	0	0	equal_bothsteps	equal	0	Success at all eik	This sg doesnt have any
582	JAHKIP_FSR	0	0	0	-0.00207	0	0.01349	0.01324	0.0143	-0.01108	0	-0.00454	0	0	0	0	-0.05085	0	0.00402	0.0511113	2	Na2-H54-C46-S2-N6-Cl2-O10	0	0	equal_bothsteps	equal	0	Success at all eik	This sg doesnt have any
79	LEQGUJ_FSR	-0.00888	0.04671	0.00605	0	-0.00251	0	0	0	0	-0.01239	0	0.0176	-0.01705	0.0117	-0.03703	0	-0.00418	0	0.0510111	m	C12-H16-Mg2-N4-O14	0	0	equal_bothsteps	equal	0	Success at all eik	This sg doesnt have any
717	XEQMUB01_FSR	0	0	0	-0.01871	0	0.00574	0.01314	-0.01707	-0.04026	0	-0.02048	0	0	0	0	-0.04723	0	-0.00657	0.0509614	2	C28-H32-N4-O12-Sr2	0	0	equal_bothsteps	equal	0	Success at all eik	This sg doesnt have any
741	ODEPIW_FSR	0	0	0	0	0.02513	0	0	0	0	-0.02513	0	0	0.03598	-0.03598	0	0	0	0	0.0508834	-42m	Cd2-H12-C20-N4-Cl12	0	0	equal_bothsteps	equal	0	Success at all eik	Success at all eik
415	ADOJEJ_FSR	0	0	0	0	0.02558	0	0	0	0	-0.02558	0	0	0.03596	-0.03596	0	0	0	0	0.0508551	-42m	Hg2-H12-C20-N4-Cl12	0	0	equal_bothsteps	equal	0	Success at all eik	Success at all eik
1164	YAVMIT_FSR	0	0	0	-0.0471	0	0	0	0	0	0	-0.04565	0	0	0	0	0	0	-0.05069	0.05069	222	Zn4-H24-C40-N32	0	0	equal_bothsteps	equal	0	Success at all eik	This sg doesnt have any
926	BEVQID_FSR	0	0	0	0	-0.02752	0	0	0	0	0.02752	0	0	-0.03583	0.03583	0	0	0	0	0.0506713	-42m	C8-Cd1-H8-O20-Sr1-Zr1	0	0	equal_bothsteps	equal	0	Success at all eik	Success at all eik
1411	LOVSOE_FSR	0.00578	-0.0091	0.00463	0	0.02315	0	0	0	0	-0.00991	0	0.00235	0.01679	0.00758	-0.00069	0	-0.04175	0	0.0505405	m	C11-Cu1-H6-N7-S1	0	0	equal_bothsteps	equal	0	Success at all eik	This sg doesnt have any
111	BUKXUC_FSR	0	0	0	-0.00737	0	0.02052	0.02126	0.01693	-0.03927	0	0.0165	0	0	0	0	-0.00097	0	0.02178	0.0505272	2	Li4-H44-C32-N8-O8	0	0	equal_bothsteps	equal	0	Success at all eik	This sg doesnt have any
211	ECOXAX_FSR	0	0	0	-0.0098	0	-0.00415	0.00796	0.04238	-0.02511	0	-0.00633	0	0	0	0	-0.00267	0	-0.01805	0.0502992	2	Na2-Cr2-H54-C30-N2-O12	2	2	equal_bothsteps	equal	2	Success at all eik	This sg doesnt have any
889	DALVAQ_FSR	0	0	0	0	-0.00383	0	0	0	0	0.01543	0	0	0.00868	-0.03886	0.03033	0	0	0	0.0500535	mm2	Cd4-H40-C48-N8-O20	0	0	equal_bothsteps	equal	0	Success at all eik	This sg doesnt have any
259	FELXAV_FSR	0	0	0	-0.00335	0	-0.01104	-0.0377	0.02498	-0.0164	0	0.0132	0	0	0	0	-0.02612	0	0.00825	0.0498848	2	Mo4-H60-C60-N4-O16	0	0	equal_bothsteps	equal	0	Success at all eik	This sg doesnt have any
1215	FUQDUS_FSR	0	0	0	-0.04814	0	0	0	0	0	0	-0.00988	0	0	0	0	0	0	-0.0497	0.0497	222	Zn4-H48-C40-S4-N8-Cl8	0	0	equal_bothsteps	equal	0	Success at all eik	This sg doesnt have any
825	XECMUP_FSR	0	0	0	-0.02352	0	0.03858	0.04057	-0.02073	-0.01455	0	-0.01337	0	0	0	0	-0.01945	0	-0.02506	0.04966	2	Cd4-H56-C24-I8-N8	0	0	equal_bothsteps	equal	0	Success at all eik	This sg doesnt have any
281	MEVDID_FSR	-0.01939	0.00808	0.02498	0	0.02281	0	0	0	0	-0.02806	0	0.01059	0.02156	-0.02665	0.012	0	0.03131	0	0.0496407	m	C44-H56-O6-Sn2	0	0	equal_bothsteps	equal	0	Success at all eik	This sg doesnt have any
1248	ANIYUS_FSR	0	0	0	0.01272	0	-0.02404	-0.02523	-0.01146	0.02559	0	0.03212	0	0	0	0	0.01751	0	0.01839	0.0495422	2	Cu2-H20-C16-O20	0	2	notequal_bothsteps	equal	0	Success at all eik	This sg doesnt have any
1304	CUHBIQ01_FSR	0	0	0	-0.00796	0	-0.00206	0.00374	-0.00464	-0.04894	0	0.0036	0	0	0	0	-0.03361	0	0.02523	0.0494328	2	Cu2-H28-C26-S2-N6	0	0	equal_bothsteps	equal	0	Success at all eik	This sg doesnt have any
876	MASZEL_FSR	0	0	0	-0.04597	0	0	0	0	0	0	-0.04375	0	0	0	0	0	0	-0.04939	0.04939	222	Cd4-H48-C48-S4-N8-O24	0	0	equal_bothsteps	equal	0	Success at all eik	This sg doesnt have any
513	MISKOR_FSR	0	0	0	0.04917	0	0	0	0	0	0	0.01474	0	0	0	0	0	0	0.01947	0.04917	222	Li4-H36-C20-N4-Cl4-O8	0	0	equal_bothsteps	equal	0	Success at all eik	This sg doesnt have any
555	QIBZAD_FSR	0	0	0	0.00811	0	0	0	0	0	0	0.04821	0	0	0	0	0	0	-0.04911	0.04911	222	C40-H32-Mn2-N8-S12	2	2	equal_bothsteps	notequal	0	Success at all eik	This sg doesnt have any
346	WUBDII_FSR	0	0	0	0.00322	0	0.00535	-0.00267	0.02637	-0.03681	0	0.01848	0	0	0	0	-0.02091	0	0.00813	0.0489795	2	Co4-P2-H44-C22-N2-O12	12	12	equal_bothsteps	notequal	0	Success at all eik	This sg doesnt have any
1028	GICTOB01_FSR	0.00476	0.03673	0.02176	0	-0.0073	0	0	0	0	-0.01375	0	0.00874	-0.03049	0.01188	-0.03093	0	0.00357	0	0.0488195	m	C12-H16-N4-O14-Zn2	0	0	equal_bothsteps	equal	0	Success at all eik	This sg doesnt have any
1049	NOQDEE_FSR	-0.00355	0.01723	-0.03574	0	-0.02142	0	0	0	0	0.00545	0	0.02461	-0.02222	0.00167	-0.0031	0	-0.0215	0	0.0487205	m	C50-H36-N12-O12-S2-Zn2	0	0	equal_bothsteps	equal	0	Success at all eik	This sg doesnt have any
482	MUQWUS_FSR	0	0	0	0.03272	0	0	0	0	0	0	0.04833	0	0	0	0	0	0	-0.0148	0.04833	222	Li4-H32-C56-N4-O24	0	0	equal_bothsteps	equal	0	Success at all eik	This sg doesnt have any
61	AMIJAJ_FSR	-0.00279	-0.00549	-0.01037	0	0.00645	0	0	0	0	-0.00213	0	0.00059	0.01633	0.01768	0.0395	0	-0.00544	0	0.0482707	mmm	Fe4-Ni4-H20-C32-I4-N24-O4	4	4	equal_bothsteps	equal	4	Centro as per csd	Centro as per csd
294	HIXZOD_FSR	0	0	0	-0.04822	0	0	0	0	0	0	0.00845	0	0	0	0	0	0	0.01545	0.04822	222	Ba4-H16-C16-O24	0	0	equal_bothsteps	equal	0	Success at all eik	This sg doesnt have any
336	INEYIK_FSR	0	0	0	0.0234	0	-0.00653	-0.01526	0.04394	-0.00685	0	0.01061	0	0	0	0	-0.02085	0	0.00816	0.0481984	2	Ca2-H44-C36-O16	0	0	equal_bothsteps	equal	0	Success at all eik	This sg doesnt have any
1415	ILAMEN_FSR	0	0	0	0.02331	0	-0.02249	-0.03591	-0.01222	0.00571	0	0.02871	0	0	0	0	-0.00449	0	0.00304	0.0479137	2	Cu4-H48-C30-N8-Cl8-O2	0	4	notequal_bothsteps	equal	0	Success at all eik	This sg doesnt have any
667	MERFUN_FSR	0	0	0	-0.04778	0	0	0	0	0	0	-0.0398	0	0	0	0	0	0	-0.01032	0.04778	222	H20-Pb4-C24-N12-O16	0	0	equal_bothsteps	equal	0	Success at all eik	This sg doesnt have any
1331	AQIGUD_FSR	0	0	0	0.01166	0	0.00662	-0.00297	0.04474	-0.00521	0	-0.01542	0	0	0	0	-4e-05	0	-0.00282	0.0477012	2	Cu2-H20-C36-I6-N6-O8	0	2	notequal_bothsteps	equal	0	Success at all eik	This sg doesnt have any
430	FATHAM_FSR	0	0	0	0.04758	0	0	0	0	0	0	0.03164	0	0	0	0	0	0	0.01535	0.04758	222	C24-F12-H20-K4-N4-O24	0	0	equal_bothsteps	equal	0	Success at all eik	This sg doesnt have any
1420	DAMTUJ_FSR	0.01412	0.00166	0.01026	0.01197	-0.012	-0.00788	-0.00429	0.01281	-0.01522	0.0052	-0.01574	-0.01005	-0.01527	0.00845	-0.00082	-0.0063	0.03417	0.01175	0.0475371	1	Cu1-H38-C26-N4-O8	1	1	equal_bothsteps	equal	1	This sg doesnt have any	This sg doesnt have any
504	AJAXOY_FSR	0	0	0	0	0.04213	0	0	0	0	-0.04007	0	0	0.03959	-0.0262	0.00161	0	0	0	0.0475016	mm2	Mg4-H24-C32-O20	0	0	equal_bothsteps	equal	0	Success at all eik	This sg doesnt have any
12	PUHWAS_FSR	0	0	0	0.00932	0	-0.01476	-0.01637	-0.01487	0.03029	0	0.00729	0	0	0	0	0.04617	0	0.0064	0.0472353	2	Br4-C20-Ca2-H36-N4-O8	0	0	equal_bothsteps	equal	0	Success at all eik	This sg doesnt have any
1350	HAXSUW_FSR	0	0	0	-0.04709	0	0	0	0	0	0	0.04706	0	0	0	0	0	0	0	0.04709	422	Cu4-H40-C24-N16-O32	0	4	notequal_bothsteps	equal	0	Success at all eik	Success at all eik
181	QESYUJ_FSR	0	0	0	0.00202	0	0.00394	0.03445	0.02054	-0.02346	0	0.00692	0	0	0	0	0.03269	0	-0.01693	0.0469782	2	Br4-C32-Cu4-H40-N8	0	0	equal_bothsteps	equal	0	Success at all eik	This sg doesnt have any
836	CECSAF_FSR	0	0	0	0	0.0113	0	0	0	0	0.04688	0	0	0.00324	0.01662	-0.0227	0	0	0	0.04688	mm2	Cd4-H32-C32-N24-O24	0	0	equal_bothsteps	equal	0	Success at all eik	This sg doesnt have any
124	LAYZIW_FSR	0	0	0	0	0.03168	0	0	0	0	-0.01253	0	0	0.03893	-0.02436	0.00901	0	0	0	0.0467989	mm2	Mg4-H24-C12-N16-O16	0	0	equal_bothsteps	equal	0	Success at all eik	This sg doesnt have any
1233	FISPOP_FSR	0	0	0	-0.00772	0	-0.00677	-0.03289	0.02162	-0.00056	0	0.01196	0	0	0	0	-0.0225	0	0.04078	0.0466297	2	Cu2-H16-C26-S2-N6-O2	0	0	equal_bothsteps	equal	0	Success at all eik	This sg doesnt have any
818	NOPFAA_FSR	0	0	0	0	-0.04352	0	0	0	0	-0.00876	0	0	-0.01974	0.0147	-0.03955	0	0	0	0.0465828	mm2	C28-Cd4-H24-N16-S8	0	0	equal_bothsteps	equal	0	Success at all eik	This sg doesnt have any
299	INEYEG_FSR	0	0	0	-0.01529	0	-0.00832	-0.01856	0.04086	0.01193	0	-0.00344	0	0	0	0	0.03451	0	-0.00211	0.0465636	2	Ca2-H32-C32-Cl4-O12	0	0	equal_bothsteps	equal	0	Success at all eik	This sg doesnt have any
1144	FUQFAA_FSR	0	0	0	-0.03914	0	0	0	0	0	0	-0.00997	0	0	0	0	0	0	-0.04654	0.04654	222	Zn4-H48-C40-Se4-N8-Cl8	0	0	equal_bothsteps	equal	0	Success at all eik	This sg doesnt have any
981	QARBUI_FSR	0	0	0	0.01479	0	-0.01308	0.01583	0.02358	-0.0227	0	0.01836	0	0	0	0	-0.00807	0	0.04285	0.0464977	2	Zn2-H24-C34-N24-O2	0	0	equal_bothsteps	equal	0	Success at all eik	This sg doesnt have any
355	NEDXOJ02_FSR	0	0	0	0.02807	0	0.01285	0.00127	-0.02405	-0.02293	0	0.03247	0	0	0	0	-0.0129	0	0.0129	0.0464769	2	Co2-H28-C36-N4-O10	2	2	equal_bothsteps	notequal	0	Success at all eik	This sg doesnt have any
827	NEQNAZ02_FSR	0	0	0	-0.0464	0	0	0	0	0	0	-0.01724	0	0	0	0	0	0	-0.0001	0.0464	222	Cd4-H32-C24-N8-O28	0	0	equal_bothsteps	equal	0	Success at all eik	This sg doesnt have any
898	NAPZOV_FSR	0	0	0	0	-0.00166	0	0	0	0	0.0134	0	0	-0.00618	-0.02976	0.03493	0	0	0	0.0463029	mm2	Cd4-H52-C48-N4-O20	0	0	equal_bothsteps	equal	0	Success at all eik	This sg doesnt have any
477	ASEMUG01_FSR	0	0	0	-0.01096	0	0	0	0	0	0	0.04607	0	0	0	0	0	0	0.02965	0.04607	222	La4-H32-C24-N4-O28	0	0	equal_bothsteps	equal	0	Success at all eik	This sg doesnt have any
738	MCYSCD_FSR	0	0	0	0.01836	0	-0.00501	0.00748	0.02124	0.00427	0	-0.02304	0	0	0	0	0.04169	0	-0.00477	0.0460005	2	Cd2-H32-C16-S4-N4-O8	0	0	equal_bothsteps	equal	0	Success at all eik	This sg doesnt have any
1212	DEHYOF_FSR	-0.00399	-0.00876	0.00717	0	0.03536	0	0	0	0	-0.04493	0	0.00185	0.00163	-0.04332	-0.00178	0	0.00133	0	0.0459839	m	C28-H24-N4-O20-P4-Zn6	0	0	equal_bothsteps	equal	0	Success at all eik	This sg doesnt have any
907	DOHJOZ01_FSR	0	0	0	0	-0.03188	0.02334	0.02334	-0.02334	0	-0.03189	0	0	-0.00474	-0.00474	-0.03319	0	0	0	0.0458964	3m	C30-Cd6-Cl12-H36-N12-O6-S6	0	0	equal_bothsteps	equal	0	Success at all eik	Success at all eik
856	AXUVEW_FSR	0	0	0	-0.01726	0	-0.00665	-0.01205	0.02853	-0.00487	0	-0.02096	0	0	0	0	-0.02466	0	-0.03512	0.0457177	2	Cd4-H12-C18-N14-Cl6	0	0	equal_bothsteps	equal	0	Success at all eik	This sg doesnt have any
795	QAKDAH_FSR	0	0	0	0.01947	0	-0.00944	0.0192	-0.02571	0.00087	0	-0.01559	0	0	0	0	-0.04032	0	-0.01346	0.0455644	2	C56-Cd2-H40-N4-O8	0	0	equal_bothsteps	equal	0	Success at all eik	This sg doesnt have any
1459	KEXFAV_FSR	0	0	0	0	-0.00962	0	0	0	0	-0.0004	0	0	-0.034	0.0194	0.02317	0	0	0	0.0454886	mm2	C60-Cu8-H48-I4-N12-S14-W2	0	0	equal_bothsteps	equal	0	Success at all eik	This sg doesnt have any
289	UWIGOX_FSR	0.0244	-0.01209	-0.01465	0	-0.0261	0	0	0	0	-0.01364	0	-0.00978	0.00069	-0.02043	-0.00648	0	-0.01566	0	0.0454883	m	Ba2-H32-C28-N8-O18	0	0	equal_bothsteps	equal	0	Success at all eik	This sg doesnt have any
639	LOBNIA_FSR	0	0	0	0	-0.02776	0	0	0	0	0.00399	0	0	-0.03035	0.03334	-0.00521	0	0	0	0.0453853	mm2	C36-H44-O2-Sn2	0	0	equal_bothsteps	equal	0	Success at all eik	This sg doesnt have any
613	KICQUL_FSR	0	0	0	0.01092	0	0.03615	0.03351	-0.00784	-0.02445	0	0.00903	0	0	0	0	0.0172	0	0.02014	0.0452626	2	Ni2-H28-C20-N4-O10	4	4	equal_bothsteps	equal	4	Success at all eik	This sg doesnt have any
653	BIGSUG_FSR	0	0	0	-0.04404	0	0	0	0	0	0	-0.0381	0	0	0	0	0	0	-0.04524	0.04524	222	Sn4-H44-C20-S4-N4-O8	0	0	equal_bothsteps	equal	0	Success at all eik	This sg doesnt have any
846	NARLEZ_FSR	0	0	0	0.02091	0	0.0101	0.01595	-0.01431	-0.03374	0	0.02092	0	0	0	0	0.0029	0	-0.00247	0.0451133	2	Cd2-Mo4-H28-C12-S8-N4-O16	0	0	equal_bothsteps	equal	0	Success at all eik	This sg doesnt have any
1408	MUJGII02_FSR	0	0	0	-0.03407	0	0	0	0	0	0	-0.03407	0	0	0	0	0	0	-0.04509	0.04509	-42m	Zn2-Cu4-H24-C24-N16	0	0	equal_bothsteps	equal	0	Success at all eik	Success at all eik
952	MUJGII02_FSR	0	0	0	-0.03407	0	0	0	0	0	0	-0.03407	0	0	0	0	0	0	-0.04506	0.04506	-42m	Zn2-Cu4-H24-C24-N16	0	0	equal_bothsteps	equal	0	Success at all eik	Success at all eik
386	XIVLUK_FSR	0	0	0	0.04504	0	0	0	0	0	0	0.04504	0	0	0	0	0	0	-0.0165	0.04504	-42m	C8-H12-In4-O20	0	0	equal_bothsteps	equal	0	Success at all eik	Success at all eik
356	MINLIG_FSR	0	0	0	0.01771	0	-0.03351	-0.03276	0.02146	-0.00316	0	0.02177	0	0	0	0	0.01411	0	0.01827	0.0449185	2	Cs2-H20-C30-N2-O10	0	0	equal_bothsteps	equal	0	Success at all eik	This sg doesnt have any
1186	BUVKAG_FSR	0	0	0	0.01338	0	0.01433	-0.01955	-0.01195	0.00443	0	0.03819	0	0	0	0	-0.04107	0	0.01621	0.0448482	2	C18-H22-N4-O6-Zn1	0	0	equal_bothsteps	equal	0	Success at all eik	This sg doesnt have any
187	CUCLPY_FSR	0	0	0	0.03262	0	0.00683	0.00086	-0.03631	-0.01259	0	-0.02305	0	0	0	0	-0.02497	0	-0.01395	0.0448215	2	Cu2-H10-C10-N2-Cl2	0	0	equal_bothsteps	equal	0	Success at all eik	This sg doesnt have any
617	ORAWEL_FSR	0	0	0	-0.02113	0	0	0	0	0	0	-0.04481	0	0	0	0	0	0	-0.04201	0.04481	222	Na4-H28-C16-O28	0	0	equal_bothsteps	equal	0	Success at all eik	This sg doesnt have any
641	GEMXUU01_FSR	0	0	0	0	-0.01154	0	0	0	0	-0.02381	0	0	0.01484	-0.02808	-0.03161	0	0	0	0.0448096	mm2	Ni4-H28-C12-N4-Cl8-O8	8	8	equal_bothsteps	equal	8	Success at all eik	This sg doesnt have any
348	XEJWUG_FSR	0	0	0	0.04477	0	0	0	0	0	0	0.03486	0	0	0	0	0	0	0.00595	0.04477	222	Co4-H32-C36-N4-O20	12	12	equal_bothsteps	equal	12	Success at all eik	This sg doesnt have any
773	TUNROL_FSR	0	0	0	0.02057	0	-0.0123	-0.01878	0.03873	-0.01144	0	-0.00105	0	0	0	0	-0.00274	0	0.00457	0.0445497	2	Cd2-H32-C24-S2-N8-O16	0	0	equal_bothsteps	equal	0	Success at all eik	This sg doesnt have any
1178	POVFUE01_FSR	0	0	0	0	-0.01287	-0.02513	-0.02513	0.02513	0	-0.01287	0	0	-0.02423	-0.02423	0.02819	0	0	0	0.0443719	3m	C54-H30-N30-Zn6	0	0	equal_bothsteps	equal	0	Success at all eik	Success at all eik
661	GETWEJ_FSR	0	0	0	-0.00013	0	0	0	0	0	0	-0.04436	0	0	0	0	0	0	-0.03594	0.04436	222	C16-H8-N8-O4-Pb2	0	0	equal_bothsteps	equal	0	Success at all eik	This sg doesnt have any
665	FAFMOO_FSR	0	0	0	-0.03512	0	0	0	0	0	0	-0.04424	0	0	0	0	0	0	-0.02781	0.04424	222	Ni4-H36-C20-N12-O24	8	8	equal_bothsteps	equal	8	Success at all eik	This sg doesnt have any
918	EDAXAL_FSR	0	0	0	0.01917	0	0	0	0	0	0	0.04423	0	0	0	0	0	0	0.03322	0.04423	222	Cd8-P4-H64-C28-N4-Cl8-O28	0	0	equal_bothsteps	equal	0	Success at all eik	This sg doesnt have any
89	UHOTER_FSR	0	0	0	0	0.0059	0	0	0	0	-0.00933	0	0	0.01648	-0.01569	-0.03787	0	0	0	0.0441804	mm2	Li4-H28-C32-Cl8-O20	0	0	equal_bothsteps	equal	0	Success at all eik	This sg doesnt have any
1089	JOMWUF_FSR	0.02459	-0.02667	0.01634	0	-0.01208	0	0	0	0	-0.00437	0	-0.02336	-0.01154	-0.01353	0.02605	0	0.00588	0	0.0439856	m	C76-H52-N4-O8-Zn2	0	0	equal_bothsteps	equal	0	Success at all eik	This sg doesnt have any
649	BOJKAM03_FSR	0	0	0	-0.00235	0	0	0	0	0	0	0.04389	0	0	0	0	0	0	0.04078	0.04389	222	Ni4-H36-C16-N4-O24	8	8	equal_bothsteps	notequal	0	Success at all eik	This sg doesnt have any
115	AFOVAT_FSR	0	0	0	0.00893	0	-0.01409	-0.00527	-0.00622	0.00677	0	0.03458	0	0	0	0	0.04176	0	-0.00633	0.0437547	2	C44-H28-La2-O16	0	0	equal_bothsteps	equal	0	Success at all eik	This sg doesnt have any
933	NASCIV_FSR	0	0	0	0	-0.03957	0	0	0	0	0.03957	0	0	-0.03072	0.03072	0	0	0	0	0.0434446	-42m	C28-Cd8-H20-N48-O8	0	0	equal_bothsteps	equal	0	Success at all eik	Success at all eik
819	NOBLUM01_FSR	0	0	0	0.0289	0	0	0	0	0	0	0.01246	0	0	0	0	0	0	0.04331	0.04331	222	Cd4-H24-C24-S12-N8-O20	0	0	equal_bothsteps	equal	0	Success at all eik	This sg doesnt have any
388	AXUFAB_FSR	-0.01171	0.00913	-0.01799	0	-0.01612	0	0	0	0	0.02973	0	0.00684	-0.0399	0.00077	0.00255	0	-0.00501	0	0.0432188	m	C28-Cl4-F8-H16-Hg4-O4	0	0	equal_bothsteps	equal	0	Success at all eik	This sg doesnt have any
1140	DUWTOG_FSR	0	0	0	0	0.04318	0	0	0	0	-0.03972	0	0	0.0314	-0.02191	0.01188	0	0	0	0.04318	mm2	Zn8-H32-C20-N32-O8	0	0	equal_bothsteps	equal	0	Success at all eik	This sg doesnt have any
1123	ROSKIV_FSR	0	0	0	0	-0.04134	0	0	0	0	-0.01147	0	0	-0.03808	0.00455	0.01981	0	0	0	0.0431651	mm2	Zn4-H24-C36-N16-O8	0	0	equal_bothsteps	equal	0	Success at all eik	This sg doesnt have any
448	OCOKIC_FSR	0	0	0	-0.01678	0	0	0	0	0	0	-0.02647	0	0	0	0	0	0	-0.04301	0.04301	222	K4-Si4-B4-H76-C28-N4	0	0	equal_bothsteps	equal	0	Success at all eik	This sg doesnt have any
789	OHETOL_FSR	0.01318	0.00465	-0.03506	0	-0.00521	0	0	0	0	0.02542	0	-0.01669	-0.0124	-0.01377	0.01463	0	-0.01044	0	0.0430053	m	C36-Cd2-H34-N10-O10	0	0	equal_bothsteps	equal	0	Success at all eik	This sg doesnt have any
602	MUXNUO02_FSR	0	0	0	-0.00184	0	0.0163	0.00578	0.02659	-0.03264	0	-0.0064	0	0	0	0	-0.01835	0	-0.00332	0.042974	2	Na4-H32-C12-S12-N12-O12	0	0	equal_bothsteps	equal	0	Success at all eik	This sg doesnt have any
485	HEPNIA_FSR	0	0	0	-0.00348	0.04278	0	0	0	0	0.04278	0.00348	0	0.00451	0.00451	-0.04023	0	0	0	0.0429213	4	Li4-H32-C28-N16-Cl4-O16	0	0	equal_bothsteps	equal	0	Success at all eik	Success at all eik
330	CAASCO03_FSR	0	0	0	0.00175	0	0.02016	0.00411	-0.00136	-0.00307	0	-0.02034	0	0	0	0	0.00721	0	-0.0374	0.0428489	2	Ca2-H36-C24-O28	0	0	equal_bothsteps	equal	0	Success at all eik	This sg doesnt have any
1000	RABNEP_FSR	0.00445	-0.03035	-0.00044	0	-0.02386	0	0	0	0	-0.01294	0	-0.02432	-0.00474	0.0017	0.033	0	0.01369	0	0.0428123	m	C28-H20-N12-O8-Zn2	0	0	equal_bothsteps	equal	0	Success at all eik	This sg doesnt have any
721	UCOCEV_FSR	0	0	0	0.00089	0	0.01996	0.00306	0.00019	0.00083	0	-0.02187	0	0	0	0	0.00747	0	-0.03719	0.0426597	2	Sr2-H36-C24-O28	0	0	equal_bothsteps	equal	0	Success at all eik	This sg doesnt have any
1329	INUNUB_FSR	0.00792	-0.00615	0.01606	0	0.00752	0	0	0	0	-0.01263	0	-0.00381	0.03078	-0.0044	0.02192	0	0.00587	0	0.0424546	m	C40-Cu2-H32-N12-O8	0	2	notequal_bothsteps	equal	0	Success at all eik	This sg doesnt have any
651	CARFAD_FSR	0	0	0	0	-0.04239	0	0	0	0	-0.00329	0	0	-0.01762	0.02203	0.00705	0	0	0	0.04239	mm2	C24-H32-N8-S8-Sn4	0	0	equal_bothsteps	equal	0	Success at all eik	This sg doesnt have any
1310	WUWVIU_FSR	0	0	0	0.00434	0	0.01342	0.03256	0.00616	-0.02585	0	-0.00553	0	0	0	0	-0.01009	0	-0.01427	0.0423899	2	Cu2-H28-C24-N8-O8	0	2	notequal_bothsteps	equal	0	Success at all eik	This sg doesnt have any
586	WIHCUM_FSR	-0.03116	0.01271	-0.00075	0	-0.01479	0	0	0	0	-0.00409	0	0.006	0.01265	-0.02014	-0.02154	0	-0.0038	0	0.0423776	m	Na4-H24-C8-S8-O16	0	0	equal_bothsteps	equal	0	Success at all eik	This sg doesnt have any
525	CIJZIG_FSR	0	0	0	0.01554	0	0.03872	-0.00137	-0.01131	0.02296	0	0.00327	0	0	0	0	0.00364	0	-0.00928	0.042365	2	Mn2-H20-C12-O10	10	10	equal_bothsteps	equal	10	Success at all eik	This sg doesnt have any
1051	VIWHOA_FSR	-0.00284	-0.00194	0.00449	0.0002	0.0228	0.01175	0.01519	0.01055	-0.00919	-0.02119	0.00421	-0.01515	0.02003	-0.02505	0.0189	-0.00861	0.00586	0.01191	0.0423169	1	Zn3-H26-C40-N2-O16	0	0	equal_bothsteps	equal	0	This sg doesnt have any	This sg doesnt have any
1440	MUSGIQ_FSR	0	0	0	-0.02945	0	0	0	0	0	0	-0.02393	0	0	0	0	0	0	-0.0423	0.0423	222	Cu8-H32-C48-I8-N8	0	0	equal_bothsteps	equal	0	Success at all eik	This sg doesnt have any
874	YARYOF_FSR	-0.01422	0.0181	0.00515	0	0.00352	0	0	0	0	-0.03833	0	0.01733	0.01359	-0.01882	-0.01876	0	0.01434	0	0.0420656	m	C36-Cd4-H44-N16	0	0	equal_bothsteps	equal	0	Success at all eik	This sg doesnt have any
200	KEKRIE_FSR	-0.01266	0.00029	0.01985	0	-0.01604	0	0	0	0	-0.02217	0	-0.00964	0.01464	-0.03138	0.02271	0	0.00402	0	0.042064	m	C40-Ca2-H44-N8-O16	0	0	equal_bothsteps	equal	0	Success at all eik	This sg doesnt have any
1165	LIHBUB_FSR	0	0	0	0.00383	0	0	0	0	0	0	-0.04204	0	0	0	0	0	0	-0.00185	0.04204	222	Zn4-H28-C40-N12-O20	0	0	equal_bothsteps	equal	0	Success at all eik	This sg doesnt have any
1246	DIDNOV_FSR	0.00017	0.01127	0.01019	0.00573	-0.00161	-0.00355	-0.00399	-0.01539	-0.01649	-0.01235	0.00451	0.01655	-0.00479	-0.01271	-0.01308	-0.00839	0.00359	0.01049	0.0419595	1	Cu2-H18-C22-N4	0	0	equal_bothsteps	equal	0	This sg doesnt have any	This sg doesnt have any
402	ADOJIN_FSR	0	0	0	0	-0.02368	0	0	0	0	0.02368	0	0	-0.02964	0.02964	0	0	0	0	0.0419173	-42m	Hg2-H12-C20-Br8-N4-Cl4	0	0	equal_bothsteps	equal	0	Success at all eik	Success at all eik
43	KIZQAN_FSR	0	0	0	0.00827	0	-0.02521	0.02206	-0.00134	-0.01599	0	0.02028	0	0	0	0	-0.03443	0	0.0137	0.0418565	2	Cd2-H10-C12-N6-Cl4	0	0	equal_bothsteps	equal	0	Success at all eik	This sg doesnt have any
209	RIVBOO_FSR	0	0	0	0	-0.04174	0	0	0	0	0.00627	0	0	-0.00706	0.00258	0.03024	0	0	0	0.04174	mm2	C60-Cd2-F12-H40-N4-O8	0	0	equal_bothsteps	equal	0	Success at all eik	This sg doesnt have any
291	CATART03_FSR	0	0	0	0.02182	0	0	0	0	0	0	0.02037	0	0	0	0	0	0	0.04166	0.04166	222	Ca4-H32-C16-O32	0	0	equal_bothsteps	equal	0	Success at all eik	This sg doesnt have any
4	MISHEC_FSR	-0.01022	0.02262	-0.00377	0	-0.00496	0	0	0	0	0.02754	0	0.03119	0.01491	-0.00789	-0.00134	0	-0.01882	0	0.0416085	m	Ba2-C12-H20-Ni2-O22	0	0	equal_bothsteps	notequal	4	Success at all eik	This sg doesnt have any
541	OWOSUQ_FSR	0	0	0	-0.00612	0	0.02721	-0.00563	0.02324	0.02122	0	-0.01676	0	0	0	0	0.03628	0	-0.01116	0.0416027	2	Na2-H40-C26-S2-N2-O20	0	0	equal_bothsteps	equal	0	Success at all eik	This sg doesnt have any
571	MNMLTH_FSR	0	0	0	-0.04157	0	0	0	0	0	0	-0.00117	0	0	0	0	0	0	-0.01039	0.04157	222	Mn4-H32-C16-O28	20	20	equal_bothsteps	equal	20	Success at all eik	This sg doesnt have any
728	ODEPOC_FSR	0	0	0	0	-0.02333	0	0	0	0	0.02333	0	0	-0.02938	0.02938	0	0	0	0	0.0415496	-42m	Cd2-H12-C20-Br8-N4-Cl4	0	0	equal_bothsteps	equal	0	Success at all eik	Success at all eik
1282	SAFKER_FSR	-0.0117	-0.0186	0.02383	0	0.00702	0	0	0	0	0.00372	0	-0.02009	-0.01805	-0.02261	-0.02663	0	0.01252	0	0.0414087	m	Cu2-H30-C26-N6-O10	0	2	notequal_bothsteps	equal	0	Success at all eik	This sg doesnt have any
426	MALSIE_FSR	-0.02839	0.02839	0	-0.00944	0	0	0	0	0	0	0.00944	0.02839	0	0	0	0	0	0	0.0412444	32	Fe6-H18-C42-O18	24	24	equal_bothsteps	equal	24	Success at all eik	Success at all eik
107	BIYXEN_FSR	0	0	0	0.01428	0	0.01754	0.01897	-0.01484	-0.02696	0	0.0197	0	0	0	0	0.01208	0	-0.00151	0.0411706	2	Zn2-Mo4-H28-C12-S8-N4-O16	0	0	equal_bothsteps	equal	0	Success at all eik	This sg doesnt have any
1122	GALSER_FSR	0	0	0	0.03928	0	0	0	0	0	0	0.04115	0	0	0	0	0	0	0.01201	0.04115	222	Zn4-H52-C32-S8-N8-Cl4-O16	0	0	equal_bothsteps	equal	0	Success at all eik	This sg doesnt have any
345	EKEXEY01_FSR	0	0	0	-0.00683	0	-0.01265	-0.02124	-0.02065	-0.02629	0	-0.01108	0	0	0	0	-0.00518	0	-0.00912	0.0411277	2	C18-Co3-H30-O24	9	3	notequal_bothsteps	notequal	3	Success at all eik	This sg doesnt have any
1091	RUGFUW_FSR	0	0	0	0.0003	0	0.02707	0.02394	-0.02646	0.01684	0	0.01143	0	0	0	0	0.02012	0	0.01038	0.041079	2	Zn2-H48-C72-N12-O16	0	0	equal_bothsteps	equal	0	Success at all eik	This sg doesnt have any
282	XEJVOZ_FSR	0	0	0	0	-0.01507	-0.02701	-0.02701	0.02701	0	-0.01506	0	0	-0.01276	-0.01276	0.0163	0	0	0	0.0410595	3m	C60-H24-N24-O48-Sr12	0	0	equal_bothsteps	equal	0	Success at all eik	Success at all eik
763	BERSOI_FSR	0	0	0	0	0.02943	0	0	0	0	-0.0409	0	0	-0.01555	-0.00238	-0.00545	0	0	0	0.0409	mm2	C12-Cd2-H16-N20-O4	0	0	equal_bothsteps	equal	0	Success at all eik	This sg doesnt have any
709	UQEFUS_FSR	0	0	0	0.0179	0	-0.03664	0.00068	-0.02372	-0.02463	0	-0.00059	0	0	0	0	-0.02655	0	-0.01178	0.0408071	2	Sn4-H24-C28-N4-O22	0	0	equal_bothsteps	equal	0	Success at all eik	This sg doesnt have any
887	CAKFAY_FSR	0	0	0	0	-0.01892	0	0	0	0	0.01683	0	0	-0.02918	0.0283	0.00216	0	0	0	0.0407066	mm2	Cd4-H32-C48-N8-O16	0	0	equal_bothsteps	equal	0	Success at all eik	This sg doesnt have any
826	NURYOO01_FSR	0	0	0	0	0.00654	0	0	0	0	-0.01978	0	0	0.02112	-0.02579	-0.02312	0	0	0	0.0405674	mm2	Cd4-H28-C12-N4-Cl8-O8	0	0	equal_bothsteps	equal	0	Success at all eik	This sg doesnt have any
1359	ARUTEO_FSR	0	0	0	-0.04052	0	0	0	0	0	0	-0.01323	0	0	0	0	0	0	-0.01289	0.04052	222	Cu2-H24-C36-N4-O12-F8	0	2	notequal_bothsteps	equal	0	Success at all eik	This sg doesnt have any
1371	KOZKUH_FSR	0	0	0	0.0113	0	-0.01846	-0.01242	-0.02665	0.02466	0	0.01031	0	0	0	0	0.03123	0	0.02555	0.0404988	2	Cu2-H32-C34-N6-Cl2-O4	0	2	notequal_bothsteps	equal	0	Success at all eik	This sg doesnt have any
168	WATYIB_FSR	0	0	0	0.02354	0	0.01157	0.00703	-0.02755	0.02658	0	0.01002	0	0	0	0	0.0178	0	0.01223	0.040191	2	C44-F6-H30-N6-O12-Si1-Zn1	0	0	equal_bothsteps	equal	0	Success at all eik	This sg doesnt have any
237	VINWOH_FSR	0	0	0	0	-0.00997	0	0	0	0	0.04012	0	0	0.01366	0.00505	-0.02012	0	0	0	0.04012	mm2	K4-H84-C96-S8-O36	0	0	equal_bothsteps	equal	0	Success at all eik	This sg doesnt have any
945	BIZSEJ_FSR	0	0	0	-0.00362	0	-0.00487	-0.01033	0.03424	0.00821	0	-0.0162	0	0	0	0	0.01743	0	0.00697	0.0401115	2	Zn2-H24-C12-S6-N4-O16	0	0	equal_bothsteps	equal	0	Success at all eik	This sg doesnt have any
569	LIWMOU_FSR	0	0	0	0	0.04007	0	0	0	0	-0.00779	0	0	0.02976	0.00723	0.02046	0	0	0	0.04007	mm2	Mn4-H36-C28-N4-O28	20	20	equal_bothsteps	notequal	10	Success at all eik	This sg doesnt have any
217	LALXON_FSR	-0.00075	0.00563	0.00012	0.02228	-0.00189	-0.01971	-0.03444	0.01464	-0.00295	0.00186	0.01096	-0.00347	-0.00469	0.00146	-0.00506	0.00195	-0.00356	0.01984	0.0400221	2	Co4-H56-C40-O16	4	2	notequal_bothsteps	notequal	6	Failed at e35	This sg doesnt have any
1110	WISZUT01_FSR	-0.0122	0.0122	0	-0.0218	-0.02711	0.00663	0.00663	-0.00663	0	-0.02711	0.0218	0.0122	-0.00685	-0.00685	0.02136	0	0	0	0.0399473	3	Zn3-H45-C36-N3-O12	0	0	equal_bothsteps	equal	0	Success at all eik	Success at all eik
1086	DUTJUZ_FSR	0	0	0	0	-0.01419	-0.02627	-0.02627	0.02627	0	-0.01419	0	0	-0.00807	-0.00807	0.00478	0	0	0	0.0397691	3m	C30-H24-N14-O6-Zn3	0	0	equal_bothsteps	equal	0	Success at all eik	Success at all eik
1197	FAPYOM_FSR	0	0	0	0.02618	0	0	0	0	0	0	0.03972	0	0	0	0	0	0	0.00118	0.03972	222	Zn4-H36-C48-N4-O12	0	0	equal_bothsteps	equal	0	Success at all eik	This sg doesnt have any
127	EPOJAV_FSR	-0.00878	-0.01375	0.0051	-0.009	-0.00213	0.00288	0.00714	0.02333	-0.0197	0.01083	0.00121	-0.00315	-0.00018	0.00782	-0.00551	0.00811	-0.00503	-0.00124	0.0396786	1	Sn2-H28-C20-N2-Cl2-O4	0	0	equal_bothsteps	equal	0	This sg doesnt have any	This sg doesnt have any
839	MOGVEK_FSR	0	0	0	0.01306	0	0	0	0	0	0	-0.03956	0	0	0	0	0	0	0.00604	0.03956	222	Cd4-H12-C8-Br4-N16	0	0	equal_bothsteps	equal	0	Success at all eik	This sg doesnt have any
159	FEFPAJ_FSR	0	0	0	-0.00375	0	-0.01018	0.00077	-0.03373	-0.01681	0	-0.01119	0	0	0	0	0.01593	0	0.00979	0.0393205	2	Mn2-H34-C14-Br4-N2-O8	10	10	equal_bothsteps	equal	10	Success at all eik	This sg doesnt have any
1052	FOCLOB_FSR	0	0	0	-0.03924	0	0	0	0	0	0	-0.02367	0	0	0	0	0	0	-0.02684	0.03924	222	C72-H52-N8-O16-Zn2	0	0	equal_bothsteps	equal	0	Success at all eik	This sg doesnt have any
1021	OKODAV_FSR	0	0	0	-0.03778	0	-0.00629	-0.0024	-0.00081	0.00244	0	-0.02008	0	0	0	0	0.00748	0	0.00583	0.0392086	2	Zn2-H32-C20-N20	0	0	equal_bothsteps	equal	0	Success at all eik	This sg doesnt have any
215	DOCQOC_FSR	-0.0014	0.00667	-0.03688	-1e-05	0.01056	-8e-05	-0.00013	-4e-05	0.00013	-0.01592	0.00022	0.0051	0.00883	-0.01794	-0.00704	-3e-05	-0.02178	0	0.0391822	m	C42-Cd2-Ce2-H34-N6-O32	0	0	equal_bothsteps	equal	0	Success at all eik	This sg doesnt have any
723	ODEQET01_FSR	0	0	0	0	0.02235	0	0	0	0	-0.02235	0	0	0.02747	-0.02747	0	0	0	0	0.0388484	-42m	Cd2-H12-C20-Br12-N4	0	0	equal_bothsteps	equal	0	Success at all eik	Success at all eik
833	BUXBUR_FSR	0	0	0	-0.03879	0	0	0	0	0	0	-0.015	0	0	0	0	0	0	-0.01887	0.03879	222	Cd4-H36-C20-N4-Cl8-O8	0	0	equal_bothsteps	equal	0	Success at all eik	This sg doesnt have any
662	BUXFUW_FSR	-0.01208	-0.0003	-0.00168	0.01883	-0.01013	0.00689	0.00591	0.00132	0.00026	-0.00769	0.01068	-0.00941	-0.00619	0.0069	-0.00327	0.00898	-0.00817	0.02338	0.0385213	222	Ni4-H48-C32-N32	2	6	notequal_bothsteps	notequal	8	Failed at e35	This sg doesnt have any
623	LUYZAH01_FSR	0	0	0	0.03852	0	0	0	0	0	0	-0.03852	0	0	0	0	0	0	0	0.03852	422	C24-H20-N4-Ni2-O8	4	4	equal_bothsteps	notequal	0	Success at all eik	Success at all eik
1230	HERPUQ_FSR	0	0	0	-0.00727	0	-0.00547	-0.00314	-0.01375	-0.02981	0	-0.01985	0	0	0	0	-0.02345	0	-0.01056	0.0384913	2	Cu2-H30-C34-Br2-N8-O8	2	2	equal_bothsteps	equal	2	Success at all eik	This sg doesnt have any
896	LUWYAE_FSR	0	0	0	-0.03387	0	0	0	0	0	0	-0.03844	0	0	0	0	0	0	-0.02012	0.03844	222	Cd4-H36-C52-N4-O24-F16	0	0	equal_bothsteps	equal	0	Success at all eik	This sg doesnt have any
686	NIHFUG_FSR	0	0	0	0.0242	0	0	0	0	0	0	0.03241	0	0	0	0	0	0	0.0381	0.0381	222	Tl4-H64-C44-S4-N4-O8	0	0	equal_bothsteps	equal	0	Success at all eik	This sg doesnt have any
879	INIZEK_FSR	0	0	0	-0.02442	0	0	0	0	0	0	-0.01878	0	0	0	0	0	0	-0.0381	0.0381	222	Cd4-H32-C48-S8-N8-O12	0	0	equal_bothsteps	equal	0	Success at all eik	This sg doesnt have any
1433	UZEBAE_FSR	0	0	0	0	-0.02412	0	0	0	0	0.00188	0	0	0.02918	-0.00768	-0.0231	0	0	0	0.0380009	mm2	Cu6-H20-C24-S4-I2-O4	0	0	equal_bothsteps	equal	0	Success at all eik	This sg doesnt have any
871	BUSJOR_FSR	0	0	0	0	0.03563	0	0	0	0	0.03799	0	0	0.02004	0.00949	0.00666	0	0	0	0.03799	mm2	Cd4-H64-C48-N24	0	0	equal_bothsteps	equal	0	Success at all eik	This sg doesnt have any
700	IXODUV_FSR	0	0	0	0.03769	0	0	0	0	0	0	0.00102	0	0	0	0	0	0	0.00377	0.03769	222	V4-H48-C56-O20	3	0	notequal_bothsteps	notequal	2	Success at all eik	This sg doesnt have any
150	LINJEY_FSR	0	0	0	0	0.02269	0	0	0	0	-0.00281	0	0	0.02289	-0.02293	0.01906	0	0	0	0.0375902	mm2	C28-H24-N4-O8-Tl4	0	0	equal_bothsteps	equal	0	Success at all eik	This sg doesnt have any
1410	XIFXEQ_FSR	0	0	0	0.0235	0	0.01827	-0.01282	0.02253	-0.01933	0	0.01897	0	0	0	0	-0.02081	0	-0.00386	0.0374895	2	Cu4-H32-C36-N16-O4	0	0	equal_bothsteps	equal	0	Success at all eik	This sg doesnt have any
864	GUPCOK01_FSR	0.0245	-0.0245	0	-0.01408	0	0	0	0	0	0	0.01408	-0.0245	0	0	0	0	0	0	0.0373998	32	Cd3-H42-C30-N12	0	0	equal_bothsteps	equal	0	Success at all eik	Success at all eik
1076	FODRIA_FSR	0	0	0	0.0115	0	0.01039	0.02703	0.01713	-0.01905	0	-0.00329	0	0	0	0	0.00388	0	0.01951	0.037387	2	Zn4-H28-C24-N28-O4	0	0	equal_bothsteps	equal	0	Success at all eik	This sg doesnt have any
1075	MOYPIA_FSR	0.01302	-0.00971	-0.00144	0	0.03319	0	0	0	0	0.00098	0	0.00053	0.02	-0.0013	-0.00457	0	-0.00607	0	0.0370693	m	C62-H56-N4-O8-Zn2	0	0	equal_bothsteps	equal	0	Success at all eik	This sg doesnt have any
1196	MIQTOX_FSR	0	0	0	0.02457	0	0	0	0	0	0	0.01544	0	0	0	0	0	0	0.03704	0.03704	222	Zn4-H56-C56-N24-O8	0	0	equal_bothsteps	equal	0	Success at all eik	This sg doesnt have any
863	QIVBUT_FSR	0	0	0	0.02311	0	0	0	0	0	0	0.03703	0	0	0	0	0	0	0.02602	0.03703	222	Cd2-Fe2-H48-C60-S4-N8-O12	0	0	equal_bothsteps	equal	0	Success at all eik	This sg doesnt have any
83	AVOLAZ_FSR	0.00311	-0.00569	0.00689	0.00033	0.02678	-0.01667	-0.00584	-0.00541	-0.002	0.00633	0.00101	-0.00228	0.00418	0.00909	0.01434	0.00835	0.01472	-0.00046	0.0369545	1	Na1-Zn3-H13-C19-O17	0	0	equal_bothsteps	equal	0	This sg doesnt have any	This sg doesnt have any
162	KACHUT_FSR	0	0	0	0	-0.01042	0	0	0	0	-0.01042	0	0	-0.01001	-0.01001	-0.03407	0	0	0	0.036894	4mm	C48-H40-Pt4-S8	0	0	equal_bothsteps	equal	0	Success at all eik	Success at all eik
1072	QOGFIB_FSR	0	0	0	0	-0.01099	0	0	0	0	0.00057	0	0	-0.01795	-0.01099	0.03016	0	0	0	0.0367778	mm2	Br8-C8-H32-N8-Zn4	0	0	equal_bothsteps	equal	0	Success at all eik	This sg doesnt have any
622	BEGBOG_FSR	0	0	0	-0.03675	0	0	0	0	0	0	-0.03675	0	0	0	0	0	0	-0.03675	0.03675	23	Na4-H60-Pb4-C32-O24	0	0	equal_bothsteps	equal	0	Success at all eik	Success at all eik
777	GUPDUR_FSR	0	0	0	0.02129	0	0	0	0	0	0	0.02129	0	0	0	0	0	0	0.03627	0.03627	-42m	C36-Cd2-H28-N8	0	0	equal_bothsteps	equal	0	Success at all eik	Success at all eik
1022	BIZSEJ01_FSR	0	0	0	0.00101	0	0.01166	0.01689	-0.03091	0.00382	0	0.00752	0	0	0	0	0.00965	0	-0.00741	0.0362194	2	Zn2-H24-C12-S6-N4-O16	0	0	equal_bothsteps	equal	0	Success at all eik	This sg doesnt have any
264	ALIGOS_FSR	0	0	0	0	0.0362	0	0	0	0	-0.00888	0	0	0.02572	-0.01866	-0.01297	0	0	0	0.0362	mm2	Li4-H52-C68-N16	0	0	equal_bothsteps	equal	0	Success at all eik	This sg doesnt have any
1400	NALLAP_FSR	0	0	0	0.01333	0	0	0	0	0	0	0.00601	0	0	0	0	0	0	0.03604	0.03604	222	Cu4-H32-C48-I4-N8	0	0	equal_bothsteps	equal	0	Success at all eik	This sg doesnt have any
123	OJEPIE_FSR	0	0	0	0	0.00204	0	0	0	0	-0.01735	0	0	0.01122	-0.02804	0.01955	0	0	0	0.0359768	mm2	Hg4-H44-C24-S4-I4	0	0	equal_bothsteps	equal	0	Success at all eik	This sg doesnt have any
202	EDEXER_FSR	0.01118	-0.002	0.00418	0	0.02273	0	0	0	0	-0.02465	0	-0.02612	0.02016	-0.01661	-0.00538	0	0.01065	0	0.0359149	m	Ba2-C40-H56-O20	0	0	equal_bothsteps	equal	0	Success at all eik	This sg doesnt have any
893	MOGVIO_FSR	0	0	0	0	0.03589	0	0	0	0	-0.01208	0	0	0.01838	0.00699	0.0147	0	0	0	0.03589	mm2	Cd4-H16-C8-S4-N16-O16	0	0	equal_bothsteps	equal	0	Success at all eik	This sg doesnt have any
1319	XANBUL_FSR	0	0	0	0	0.02052	0	0	0	0	0.00149	0	0	0.03457	0.00802	0.00532	0	0	0	0.0358846	mm2	C24-Cu4-H20-N8	0	0	equal_bothsteps	equal	0	Success at all eik	This sg doesnt have any
1321	GAJBEB_FSR	0	0	0	-0.0164	0	0.01066	-0.01516	-0.00394	0.00649	0	0.02208	0	0	0	0	0.01676	0	0.0316	0.0358291	2	Cu4-H20-C26-I4-N8	0	0	equal_bothsteps	equal	0	Success at all eik	This sg doesnt have any
701	HXTPSN01_FSR	0	0	0	0.03577	0	0	0	0	0	0	0.01724	0	0	0	0	0	0	0.0209	0.03577	222	Sn4-H64-C72-O4	0	0	equal_bothsteps	equal	0	Success at all eik	This sg doesnt have any
597	IFUJID_FSR	0	0	0	0	0.03569	0	0	0	0	0.00863	0	0	-0.00994	0.00665	0.03295	0	0	0	0.03569	mm2	Na4-H28-C8-S8-O16	0	0	equal_bothsteps	equal	0	Success at all eik	This sg doesnt have any
685	REQBUL_FSR	0	0	0	0.00495	0	0	0	0	0	0	0.0356	0	0	0	0	0	0	-0.01469	0.0356	222	Sn4-H36-C36-N4-O8-F8	0	0	equal_bothsteps	equal	0	Success at all eik	This sg doesnt have any
809	DUKYOZ_FSR	0	0	0	0	-0.00306	0	0	0	0	0.02812	0	0	0.00379	0.0218	-0.02766	0	0	0	0.0354215	mm2	Cd2-H40-C44-N8	0	0	equal_bothsteps	equal	0	Success at all eik	This sg doesnt have any
580	UKEWIR_FSR	0	0	0	-0.03179	0	0	0	0	0	0	0.0352	0	0	0	0	0	0	-0.02127	0.0352	222	C24-H24-Na2-O24-Y2	0	0	equal_bothsteps	equal	0	Success at all eik	This sg doesnt have any
1135	FUZVAZ_FSR	0.00493	-0.02357	0.01582	0.0162	-0.00838	0.00137	-0.00208	0.01404	0.00336	0.01381	-0.01515	-0.01583	-0.01039	0.01415	0.00898	0.00372	0.00513	0.0096	0.0350625	1	Zn2-H48-C68-N4-O12	0	0	equal_bothsteps	equal	0	This sg doesnt have any	This sg doesnt have any
445	XELHUS_FSR	0	0	0	-0.01977	0	0	0	0	0	0	0.01567	0	0	0	0	0	0	-0.03491	0.03491	222	K8-H36-C24-N4-O28	0	0	equal_bothsteps	equal	0	Success at all eik	This sg doesnt have any
1036	MUZQII_FSR	0	0	0	-0.01614	0	0.01522	0.00374	-0.01032	0.01731	0	-0.00954	0	0	0	0	0.02256	0	-0.0147	0.0347544	2	Zn2-H56-C48-N8-O8	0	0	equal_bothsteps	equal	0	Success at all eik	This sg doesnt have any
704	UDISIK_FSR	0	0	0	-0.00389	0	0	0	0	0	0	-0.01461	0	0	0	0	0	0	-0.0346	0.0346	222	C10-F3-H8-N2-V1	2	2	equal_bothsteps	equal	2	Success at all eik	This sg doesnt have any
1176	JUKVEQ01_FSR	0	0	0	-0.00118	0	0	0	0	0	0	0.02121	0	0	0	0	0	0	0.03424	0.03424	222	Zn4-H32-C48-N8-O16	0	0	equal_bothsteps	equal	0	Success at all eik	This sg doesnt have any
494	IHUZAO_FSR	0	0	0	0.02443	0	0	0	0	0	0	0.02894	0	0	0	0	0	0	0.03406	0.03406	222	Li4-B4-H16-C16-N8-F16	0	0	equal_bothsteps	equal	0	Success at all eik	This sg doesnt have any
1104	PIPKUW_FSR	0	0	0	0	0.01771	0	0	0	0	0.02645	0	0	0.01513	0.01946	-0.02349	0	0	0	0.0340498	mm2	Zn4-H32-C36-S4-N8	0	0	equal_bothsteps	equal	0	Success at all eik	This sg doesnt have any
1200	MUDTAJ_FSR	0	0	0	0	-0.00751	-0.01939	-0.01939	0.01939	0	-0.0075	0	0	-0.01962	-0.01962	0.01946	0	0	0	0.0338907	3m	C60-H30-N30-O12-Zn6	0	0	equal_bothsteps	equal	0	Success at all eik	Success at all eik
673	VEWMEP_FSR	0	0	0	0.01188	0	0	0	0	0	0	0.00755	0	0	0	0	0	0	0.03389	0.03389	222	Sr4-H44-C16-N4-O28	0	0	equal_bothsteps	equal	0	Success at all eik	This sg doesnt have any
1434	SAWVUH_FSR	0	0	0	-0.0029	0	0	0	0	0	0	-0.03385	0	0	0	0	0	0	0.00651	0.03385	222	Cu4-H36-C40-N4-Cl4	0	0	equal_bothsteps	equal	0	Success at all eik	This sg doesnt have any
670	METJIH_FSR	0	0	0	0.03375	0	0	0	0	0	0	-0.03375	0	0	0	0	0	0	0	0.03375	422	H32-Pb8-C24-Br8-O16	0	0	equal_bothsteps	equal	0	Success at all eik	Success at all eik
1424	AKAYER_FSR	0	0	0	-0.00568	0	0.01041	0.00999	0.00109	0.00602	0	-0.0038	0	0	0	0	0.0092	0	-0.03029	0.0337289	2	C48-Cu4-H30-I4-N6-O12	0	0	equal_bothsteps	equal	0	Success at all eik	This sg doesnt have any
396	ZEGRUB_FSR	0	0	0	0.0337	0	0	0	0	0	0	-0.03368	0	0	0	0	0	0	-0.00184	0.0337	422	C32-Fe4-H16-O20	4	0	notequal_bothsteps	notequal	20	Failed at e36	Success at all eik
859	WOFWIX_FSR	0.00605	-0.01919	0.02072	0.00449	0.00252	-0.01117	-0.01069	0.0167	0.00067	0.00324	0.00318	-0.00831	0.00387	0.00411	-0.0045	0.00286	0.0172	0.00548	0.0335665	1	Cd3-H24-C36-N12	0	0	equal_bothsteps	equal	0	This sg doesnt have any	This sg doesnt have any
405	RODMOP_FSR	-0.01347	0.01347	0	0.02738	0	0	0	0	0	0	-0.02738	0.01347	0	0	0	0	0	0	0.0333549	32	Fe3-H42-C30-N12	12	12	equal_bothsteps	notequal	4	Success at all eik	Success at all eik
334	PEHGAM_FSR	0	0	0	-0.03332	0	0	0	0	0	0	-6e-05	0	0	0	0	0	0	-0.02774	0.03332	222	Bi4-H32-C48-Cl4	0	0	equal_bothsteps	equal	0	Success at all eik	This sg doesnt have any
595	VIWYUW_FSR	0	0	0	0.03322	0	0	0	0	0	0	0.03322	0	0	0	0	0	0	0.03322	0.03322	23	Na4-Sr4-H24-C24-N4-O24	0	0	equal_bothsteps	equal	0	Success at all eik	Success at all eik
38	RIKREL_FSR	0	0	0	-0.00288	0	-0.01552	-0.01836	0.00879	-0.01213	0	0.0106	0	0	0	0	-0.0326	0	-0.00356	0.0331893	2	C12-Ce1-H10-O6-P2	0	0	equal_bothsteps	equal	0	Success at all eik	This sg doesnt have any
174	GIWBOF_FSR	0	0	0	-0.00346	0	-0.00877	-0.01789	0.02197	0.00213	0	-0.01657	0	0	0	0	0.00046	0	-0.01869	0.0328913	2	C24-F6-H16-N2-O4-Zn1	0	0	equal_bothsteps	equal	0	Success at all eik	This sg doesnt have any
417	RODXEO_FSR	0	0	0	0.00652	0	0	0	0	0	0	0.03282	0	0	0	0	0	0	0.02375	0.03282	222	Hg4-H56-C40-Br8-N8	0	0	equal_bothsteps	equal	0	Success at all eik	This sg doesnt have any
134	QETBOJ_FSR	0	0	0	0.02757	0	-0.01666	-0.0228	0.00472	0.01919	0	0.00268	0	0	0	0	0.01363	0	0.01313	0.0327444	2	Mn2-H36-C36-N4-O10	0	10	notequal_bothsteps	equal	0	Success at all eik	This sg doesnt have any
683	JUMDAY_FSR	0	0	0	0.03269	0	0	0	0	0	0	0.00985	0	0	0	0	0	0	0.00304	0.03269	222	V4-H48-C48-S4-O24	3	0	notequal_bothsteps	notequal	0	Success at all eik	This sg doesnt have any
114	BOPCIT_FSR	0.0098	-0.01443	0.00278	-0.00382	-0.00449	0.00216	-0.0073	0.02436	-0.00659	-0.00127	-0.00395	-0.00372	0.01292	0.00905	-0.00365	0.00402	0.00034	-0.01277	0.0325768	1	Mg1-H26-C30-N2-O10-F2	0	0	equal_bothsteps	equal	0	This sg doesnt have any	This sg doesnt have any
33	ALIMEP_FSR	0	0	0	0	-0.00485	0	0	0	0	-0.0252	0	0	0.00182	0.00209	-0.03236	0	0	0	0.0324785	mm2	Cd4-H36-C28-N28-O4	0	0	equal_bothsteps	equal	0	Success at all eik	This sg doesnt have any
690	BEHSEP_FSR	0	0	0	0	0.00389	0	0	0	0	-0.01178	0	0	0.01691	0.00101	-0.02771	0	0	0	0.0324779	mm2	C36-H52-N4-O8-Sn4	0	0	equal_bothsteps	equal	0	Success at all eik	This sg doesnt have any
609	BUGDOY_FSR	0	0	0	-0.00408	0	0	0	0	0	0	0.03242	0	0	0	0	0	0	0.02122	0.03242	222	Na4-H36-C20-N8-O20	0	0	equal_bothsteps	equal	0	Success at all eik	This sg doesnt have any
465	XEZXOQ_FSR	0	0	0	-0.00381	0	0	0	0	0	0	-0.00143	0	0	0	0	0	0	-0.03239	0.03239	222	K8-H16-C12-N8-O28	0	0	equal_bothsteps	equal	0	Success at all eik	This sg doesnt have any
857	CLIMZC_FSR	0	0	0	0	0.01725	0	0	0	0	-0.0323	0	0	0.02069	-0.00169	0.00253	0	0	0	0.0323	mm2	Cd4-H16-C12-N8-Cl8	0	0	equal_bothsteps	equal	0	Success at all eik	This sg doesnt have any
1422	IVOQEQ_FSR	0	0	0	0.03195	0	0	0	0	0	0	0.01813	0	0	0	0	0	0	0.03012	0.03195	222	Cu4-H44-C72-N4-O12	4	4	equal_bothsteps	equal	4	Success at all eik	This sg doesnt have any
1127	XANZES_FSR	0	0	0	-0.03189	0	0	0	0	0	0	0.00862	0	0	0	0	0	0	0.00745	0.03189	222	Zn4-P4-H28-C16-N8-O12	0	0	equal_bothsteps	equal	0	Success at all eik	This sg doesnt have any
759	BERRUN_FSR	-0.01149	-0.00408	0.02556	0	0.0074	0	0	0	0	-0.01754	0	0.02222	-0.00922	-0.00056	0.0095	0	0.00037	0	0.0317373	m	C16-Cd2-H24-N20-O4	0	0	equal_bothsteps	equal	0	Success at all eik	This sg doesnt have any
718	LEZNOV_FSR	-0.0217	0.0217	0	0.00799	0	0	0	0	0	0	-0.00799	0.0217	0	0	0	0	0	0	0.0317115	32	C18-H15-N6-O21-Yb3	0	0	equal_bothsteps	equal	0	Success at all eik	Success at all eik
1081	VEPCIF_FSR	0	0	0	0.00268	0	0	0	0	0	0	-0.0229	0	0	0	0	0	0	-0.03167	0.03167	222	Zn4-H28-C24-S4-N28-O8	0	0	equal_bothsteps	equal	0	Success at all eik	This sg doesnt have any
1109	OGOVUC_FSR	-0.01259	0.01308	0.00156	0	-0.02182	0	0	0	0	-0.00015	0	0.00593	-0.01752	0.0071	-0.00273	0	-0.00182	0	0.0316323	m	C58-H40-N4-O8-Zn2	0	0	equal_bothsteps	equal	0	Success at all eik	This sg doesnt have any
656	BOJKAM01_FSR	0	0	0	-0.01121	0	0	0	0	0	0	0.03161	0	0	0	0	0	0	0.02278	0.03161	222	Ni4-H36-C16-N4-O24	8	8	equal_bothsteps	notequal	0	Success at all eik	This sg doesnt have any
1211	MEHCAG_FSR	0	0	0	0.01067	0	0	0	0	0	0	0.03154	0	0	0	0	0	0	0.0233	0.03154	222	Zn4-H36-C56-N4-O20	0	0	equal_bothsteps	equal	0	Success at all eik	This sg doesnt have any
814	GISJUO01_FSR	0	0	0	0	0.02407	0	0	0	0	-0.0051	0	0	0.00687	0.0057	0.03024	0	0	0	0.0315301	mm2	Cd4-H36-C28-N4-O28	0	0	equal_bothsteps	equal	0	Success at all eik	This sg doesnt have any
841	WIVBUB_FSR	0.02222	-0.02222	0	0.00188	0	0	0	0	0	0	-0.00188	-0.02222	0	0	0	0	0	0	0.03148	32	Cd3-H60-C54-N12-O21	0	0	equal_bothsteps	equal	0	Success at all eik	Success at all eik
1352	FOWZIC_FSR	0.027	0.00275	-0.01127	0	0.00758	0	0	0	0	-0.01049	0	0.00612	0.00494	0.00351	0.00306	0	0.0148	0	0.0314388	m	Cu4-H48-C52-S8-Br4	0	0	equal_bothsteps	equal	0	Success at all eik	This sg doesnt have any
311	TECSOJ_FSR	-0.00795	0.00482	0.00641	-0.00118	0.00562	0.00167	-0.00085	-0.00031	-0.01825	-0.01886	-0.00447	-0.00411	0.00784	-0.01641	-0.00538	-0.01154	0.00436	-0.00016	0.0311936	1	Ca2-H24-C8-O19	0	0	equal_bothsteps	equal	0	This sg doesnt have any	This sg doesnt have any
1155	PACVOF_FSR	0.00624	0.00296	-5e-05	0	-0.00409	0	0	0	0	0.00774	0	0.0006	0.00359	0.02063	-0.02276	0	0.00198	0	0.0310952	m	C68-Cl4-H52-N4-O16-Zn4	0	0	equal_bothsteps	equal	0	Success at all eik	This sg doesnt have any
1139	LEBHUY_FSR	0	0	0	0.01333	0	0	0	0	0	0	-0.02474	0	0	0	0	0	0	-0.03104	0.03104	222	Zn4-H64-C40-N8-O20	0	0	equal_bothsteps	equal	0	Success at all eik	This sg doesnt have any
1145	HULGAY_FSR	0	0	0	0	0.01766	0	0	0	0	-0.01139	0	0	0.01444	-0.01239	-0.02451	0	0	0	0.0310285	mm2	Zn4-H32-C56-I12-N20-O16	0	0	equal_bothsteps	equal	0	Success at all eik	This sg doesnt have any
1221	WAZNUJ_FSR	0	0	0	0.00855	0	0	0	0	0	0	0.03086	0	0	0	0	0	0	0.0105	0.03086	222	Zn4-H40-C44-S4-N16-O16	0	0	equal_bothsteps	equal	0	Success at all eik	This sg doesnt have any
714	BEDWEN_FSR	0	0	0	-0.00168	0	0	0	0	0	0	-0.01593	0	0	0	0	0	0	-0.0308	0.0308	222	Sn4-H76-C44-S4-N4-O12	0	0	equal_bothsteps	equal	0	Success at all eik	This sg doesnt have any
492	UNIRUF03_FSR	0	0	0	-0.00489	0	1e-05	0.02251	0.00362	-0.02004	0	0.0046	0	0	0	0	0.00886	0	0.00417	0.0307012	2	C8-H8-Li4-O12	0	0	equal_bothsteps	equal	0	Success at all eik	This sg doesnt have any
275	JIPYOZ_FSR	0	0	0	-0.00776	0	0.02818	0.00849	0.00042	0.00853	0	0.01059	0	0	0	0	-0.00832	0	0.00701	0.030629	2	Sn4-P2-H64-C30-N2-O8	0	0	equal_bothsteps	equal	0	Success at all eik	This sg doesnt have any
1038	LUVBAH_FSR	0	0	0	0	-0.00778	0	0	0	0	-0.01829	0	0	0.01847	-0.00775	-0.02317	0	0	0	0.0306276	mm2	C24-H16-N8-O20-Zn4	0	0	equal_bothsteps	equal	0	Success at all eik	This sg doesnt have any
309	CAGLIS11_FSR	0	0	0	-0.02024	0	0	0	0	0	0	-0.0306	0	0	0	0	0	0	-0.01154	0.0306	222	Ca2-H44-C24-O24	0	0	equal_bothsteps	equal	0	Success at all eik	This sg doesnt have any
881	INOXUE_FSR	0	0	0	0.0097	0	0	0	0	0	0	-0.03046	0	0	0	0	0	0	-0.02426	0.03046	222	Cd4-H36-C40-N20-O8	0	0	equal_bothsteps	equal	0	Success at all eik	This sg doesnt have any
847	MOVDUW_FSR	0	0	0	0.03031	0	0	0	0	0	0	-0.01822	0	0	0	0	0	0	0.00413	0.03031	222	Cd4-H24-C16-N8-O28	0	0	equal_bothsteps	equal	0	Success at all eik	This sg doesnt have any
350	ISAGOY_FSR	0	0	0	0.01404	0	0.02408	0.02881	-0.00611	-0.00533	0	0.00382	0	0	0	0	0.0139	0	-0.00012	0.030172	2	C30-Co1-H32-N6-S2-Si2	1	1	equal_bothsteps	equal	1	Success at all eik	This sg doesnt have any
1083	PASGEX01_FSR	0.01869	-0.01869	0	0.01396	0	0	0	0	0	0	-0.01396	-0.01869	0	0	0	0	0	0	0.0298917	32	Zn3-H30-C36-N6-O18	0	0	equal_bothsteps	equal	0	Success at all eik	Success at all eik
223	RAPVAF02_FSR	0	0	0	0	0.01296	0	0	0	0	-0.01546	0	0	0.01757	-0.00746	-0.0229	0	0	0	0.0298122	mm2	C30-Cd2-H48-K2-N6-O12-S6	0	0	equal_bothsteps	equal	0	Success at all eik	This sg doesnt have any
564	ROJQEM01_FSR	0	0	0	-0.02978	0	0	0	0	0	0	-0.00235	0	0	0	0	0	0	-0.00876	0.02978	222	Mn4-H36-C20-N4-Cl8-O8	20	20	equal_bothsteps	equal	20	Success at all eik	This sg doesnt have any
364	PIRTAN_FSR	0	0	0	-0.02951	0	0	0	0	0	0	-0.02607	0	0	0	0	0	0	-0.02143	0.02951	222	Cs4-H40-C20-Cl4-O20	0	0	equal_bothsteps	equal	0	Success at all eik	This sg doesnt have any
1147	OBOGUK_FSR	0	0	0	0	0.01209	0	0	0	0	-0.0247	0	0	0.01723	-0.01285	-0.0201	0	0	0	0.029428	mm2	Zn6-H32-C46-O32	0	0	equal_bothsteps	equal	0	Success at all eik	This sg doesnt have any
1431	ZUQPIK_FSR	0	0	0	0	-0.02052	0	0	0	0	-0.01841	0	0	0.00097	0.00343	-0.02919	0	0	0	0.0294068	mm2	C64-Cu4-H64-I4-S8	0	0	equal_bothsteps	equal	0	Success at all eik	This sg doesnt have any
861	JIVXUH_FSR	0	0	0	0.02122	0	0	0	0	0	0	0.00771	0	0	0	0	0	0	0.0294	0.0294	222	Cd4-H60-C28-S8-N20	0	0	equal_bothsteps	equal	0	Success at all eik	This sg doesnt have any
1084	KENJUK_FSR	-0.00917	-0.00407	-0.00858	0	0.00402	0	0	0	0	-0.00201	0	0.0209	0.00654	0.00483	-0.00764	0	0.02689	0	0.0293382	m	C20-H8-N40-Zn4	0	0	equal_bothsteps	equal	0	Success at all eik	This sg doesnt have any
312	WUGLOA_FSR	0	0	0	0.00263	0	0.01533	-0.01975	0.01549	-0.00897	0	-0.01185	0	0	0	0	0.00828	0	0.00565	0.02917	2	C10-Ca1-H12-N4-O8	0	0	equal_bothsteps	equal	0	Success at all eik	This sg doesnt have any
1082	IVITOY_FSR	0.01125	-0.00563	0.00584	0	-0.01825	0	0	0	0	-0.02049	0	-0.00597	-0.01388	-0.01181	0.01814	0	0.00998	0	0.0290942	m	C48-H34-N6-O8-Zn2	0	0	equal_bothsteps	equal	0	Success at all eik	This sg doesnt have any
303	TANVUZ_FSR	0	0	0	0	-0.02896	0	0	0	0	0.0188	0	0	-0.00028	-0.00029	0.00094	0	0	0	0.02896	mm2	C20-Ca2-Cl4-H20-N4	0	0	equal_bothsteps	equal	0	Success at all eik	This sg doesnt have any
46	LEHHIR_FSR	0	0	0	-0.01749	0	0.01356	0.00138	-0.00068	0.01246	0	0.01369	0	0	0	0	0.01831	0	-0.00576	0.0288452	2	Cd2-H30-C38-Br2-N4-O10	0	0	equal_bothsteps	equal	0	Success at all eik	This sg doesnt have any
1355	MEKJEU_FSR	0	0	0	-0.01262	0	0.02431	0.00443	0.00336	-0.00244	0	0.00151	0	0	0	0	-0.00566	0	0.00722	0.0288411	2	Cu2-H32-C32-N4-O8	0	2	notequal_bothsteps	equal	0	Success at all eik	This sg doesnt have any
403	KMTSUL01_FSR	0	0	0	-0.02881	0	0	0	0	0	0	-0.01995	0	0	0	0	0	0	-0.02499	0.02881	222	K12-H12-C4-S12-O40	0	0	equal_bothsteps	equal	0	Success at all eik	This sg doesnt have any
772	WACJUG01_FSR	0	0	0	-0.00608	0	0	0	0	0	0	-0.00608	0	0	0	0	0	0	-0.02861	0.02861	-42m	Cd2-H16-C20-S2-N4-O8	0	0	equal_bothsteps	equal	0	Success at all eik	Success at all eik
793	JUGMUV_FSR	0.00169	0.00498	0.01203	0	6e-05	0	0	0	0	-0.025	0	-0.01389	0.00941	-0.01464	0.00605	0	-0.0026	0	0.0285995	m	C36-Cd2-H26-N22	0	0	equal_bothsteps	equal	0	Success at all eik	This sg doesnt have any
152	FAMZIE_FSR	0	0	0	0.01012	0	0.02219	0.00789	-0.01171	-0.01352	0	0.00709	0	0	0	0	-0.01843	0	0.0173	0.0285568	2	C20-H44-O10-Sn4	0	0	equal_bothsteps	equal	0	Success at all eik	This sg doesnt have any
201	KAWFIX_FSR	0	0	0	0.00811	0	-0.01437	-0.0081	0.01512	-0.01018	0	0.01713	0	0	0	0	0.00063	0	0.02408	0.0282903	2	C16-Ca4-H52-N4-O32	0	0	equal_bothsteps	equal	0	Success at all eik	This sg doesnt have any
242	CAGKON_FSR	0	0	0	-0.00791	0	-0.02468	-0.01874	0.00311	-0.002	0	-0.00938	0	0	0	0	0.01081	0	-0.01368	0.0282817	2	Na2-P4-H76-C46-N2-O12	0	0	equal_bothsteps	equal	0	Success at all eik	This sg doesnt have any
1436	MILTAC_FSR	0	0	0	-0.02811	0	0	0	0	0	0	0.01892	0	0	0	0	0	0	0.01125	0.02811	222	Cu4-H56-C32-N8-O12	0	4	notequal_bothsteps	notequal	2	Success at all eik	This sg doesnt have any
1251	QAZKEK_FSR	0.01562	-0.00538	-0.00625	0	0.00939	0	0	0	0	-0.01235	0	-0.00633	0.0164	-0.01072	0.01377	0	0.0045	0	0.0279966	m	C20-Cu2-H14-N6-O8	0	2	notequal_bothsteps	equal	0	Success at all eik	This sg doesnt have any
76	HIZJIK_FSR	0	0	0	-0.00401	0	0.00124	0.01272	-0.01248	-0.02154	0	-0.00117	0	0	0	0	-0.02556	0	-0.00366	0.0279802	2	Na4-H8-C28-O12-F20	0	0	equal_bothsteps	equal	0	Success at all eik	This sg doesnt have any
308	ROJBID_FSR	0	0	0	-0.0032	0	-0.00596	0.01434	-0.01596	0.01335	0	0.01199	0	0	0	0	-0.02017	0	0.00253	0.0279703	2	Ca2-H36-C20-N4-Cl4-O8-F4	0	0	equal_bothsteps	equal	0	Success at all eik	This sg doesnt have any
1205	NIBRUN_FSR	0	0	0	0.02781	0	0	0	0	0	0	0.02212	0	0	0	0	0	0	0.02058	0.02781	222	Zn4-H20-C40-N12-O16	0	0	equal_bothsteps	equal	0	Success at all eik	This sg doesnt have any
1453	QOJVAM_FSR	0.00094	0.00232	-0.00028	0	0.01844	0	0	0	0	0.00332	0	-0.00609	0.00502	-0.00662	-0.00208	0	-0.01914	0	0.0275503	m	C68-Cu4-H48-I4-N12	0	0	equal_bothsteps	equal	0	Success at all eik	This sg doesnt have any
675	MEYFIF01_FSR	-0.00581	0.00428	-0.00056	-0.01396	0.00852	0.01563	0.01133	-0.00983	0.00094	0.00228	-0.00523	0.00203	0.01245	-0.00516	-0.00643	-0.01444	0.00179	-0.01378	0.0275337	1	Sr2-H18-C8-O15	0	0	equal_bothsteps	equal	0	This sg doesnt have any	This sg doesnt have any
786	IGEHOS_FSR	0	0	0	-3e-05	0	0.01069	0.02209	-0.00959	-0.01104	0	0.00696	0	0	0	0	-0.0027	0	0.00765	0.0273909	2	Cd2-P4-H64-C62-Cl4-O4	0	0	equal_bothsteps	equal	0	Success at all eik	This sg doesnt have any
629	OFUCOH_FSR	0	0	0	0.00141	0	0	0	0	0	0	0.00711	0	0	0	0	0	0	-0.02739	0.02739	222	Ni4-H32-C20-N8-O28	8	8	equal_bothsteps	notequal	0	Success at all eik	This sg doesnt have any
810	OGAPIY_FSR	0	0	0	-0.01276	0	-0.00162	7e-05	-0.01278	0.00627	0	-0.02339	0	0	0	0	0.00347	0	-0.0017	0.0273813	2	Cd2-H28-C44-N24-O8	0	0	equal_bothsteps	equal	0	Success at all eik	This sg doesnt have any
1381	NUVBIR_FSR	0	0	0	-0.01266	0	0.00163	0.0063	-0.01709	0.00169	0	-0.00303	0	0	0	0	-0.0226	0	-0.01028	0.0272357	2	Cu2-H40-C48-N8-O12	2	2	equal_bothsteps	equal	2	Success at all eik	This sg doesnt have any
1149	IMEXAB_FSR	0.01168	-0.00768	-0.0137	0	0.01065	0	0	0	0	-0.01939	0	0.01796	0.01899	-0.00853	-0.00114	0	-0.00327	0	0.0272079	m	C50-H46-N10-O26-Zn4	0	0	equal_bothsteps	equal	0	Success at all eik	This sg doesnt have any
712	KOTDOO_FSR	0	0	0	-0.02711	0	0	0	0	0	0	-0.02459	0	0	0	0	0	0	-0.0085	0.02711	222	Yb4-H60-C44-O24	0	0	equal_bothsteps	equal	0	Success at all eik	This sg doesnt have any
659	XUBLUC01_FSR	0	0	0	0.01093	0	0.00579	0.0159	-0.00618	0.01847	0	0.00982	0	0	0	0	0.00401	0	0.01619	0.0269921	2	C18-H30-Ni3-O24	6	6	equal_bothsteps	notequal	2	Success at all eik	This sg doesnt have any
719	KERKEY_FSR	-0.00949	0.02418	0.00329	0	-0.00608	0	0	0	0	-0.0102	0	0.01741	-0.00311	-0.0024	0.00794	0	0.00434	0	0.0269044	m	Sn4-H68-C56-S6-N12	0	0	equal_bothsteps	equal	0	Success at all eik	This sg doesnt have any
1314	LIXROZ_FSR	0	0	0	0	0.01709	0	0	0	0	0.02689	0	0	-0.01531	0.00666	0.01177	0	0	0	0.02689	mm2	Cu4-H16-C24-S20-I4-O4	0	0	equal_bothsteps	equal	0	Success at all eik	This sg doesnt have any
735	EJAXAO_FSR	0	0	0	0.00575	0	0	0	0	0	0	0.00575	0	0	0	0	0	0	0.02685	0.02685	-42m	Cd2-H16-C24-S2-N4-O8	0	0	equal_bothsteps	equal	0	Success at all eik	Success at all eik
1348	ODOFOC_FSR	0	0	0	0.01006	0	0	0	0	0	0	0.02683	0	0	0	0	0	0	0.00151	0.02683	222	Cu4-H12-C16-I4-N8-Cl4	0	0	equal_bothsteps	equal	0	Success at all eik	This sg doesnt have any
1054	DEWHET_FSR	0	0	0	-0.02674	0	0	0	0	0	0	-0.01832	0	0	0	0	0	0	-0.0094	0.02674	222	Zn4-H40-C16-S4-N8-O12	0	0	equal_bothsteps	equal	0	Success at all eik	This sg doesnt have any
450	MINKAX01_FSR	0	0	0	0.02666	0	0	0	0	0	0	0.01983	0	0	0	0	0	0	0.00152	0.02666	222	K4-H48-C60-N4-O20	0	0	equal_bothsteps	equal	0	Success at all eik	This sg doesnt have any
703	JUMCUR_FSR	0	0	0	-0.0266	0	0	0	0	0	0	-0.00509	0	0	0	0	0	0	-0.00034	0.0266	222	V4-H52-C48-S4-N4-O20	3	0	notequal_bothsteps	notequal	0	Success at all eik	This sg doesnt have any
293	DOQMAX_FSR	0	0	0	-0.01983	0	0	0	0	0	0	-0.02659	0	0	0	0	0	0	-0.00834	0.02659	222	C48-Ca2-H60-O26	0	0	equal_bothsteps	equal	0	Success at all eik	This sg doesnt have any
1162	QARCAP_FSR	0	0	0	-0.02657	0	0	0	0	0	0	0.00541	0	0	0	0	0	0	0.01019	0.02657	222	Zn4-H32-C64-N48	0	0	equal_bothsteps	equal	0	Success at all eik	This sg doesnt have any
729	ODEPUI_FSR	0	0	0	0	0.02646	0	0	0	0	-0.02647	0	0	0.01644	-0.01644	0	0	0	0	0.02647	-42m	Cd2-H36-C28-N4-Cl4	0	0	equal_bothsteps	equal	0	Success at all eik	Success at all eik
411	ADOJOT_FSR	0	0	0	0	0.02646	0	0	0	0	-0.02646	0	0	0.01376	-0.01376	0	0	0	0	0.02646	-42m	Hg2-H36-C28-N4-Cl4	0	0	equal_bothsteps	equal	0	Success at all eik	Success at all eik
873	HULFOL_FSR	0	0	0	0	-0.01859	0	0	0	0	0.01995	0	0	-0.01044	0.01525	0.01889	0	0	0	0.026427	mm2	Cd4-H32-C56-I12-N20-O16	0	0	equal_bothsteps	equal	0	Success at all eik	This sg doesnt have any
1395	EDAWUE_FSR	0	0	0	-0.00818	0	0	0	0	0	0	0.00156	0	0	0	0	0	0	0.0264	0.0264	222	Cu4-P4-H48-C28-N4-O20	4	4	equal_bothsteps	equal	4	Success at all eik	This sg doesnt have any
912	SIVGIN05_FSR	0	0	0	0.00165	0	0.01001	0.00115	-0.01187	0.0232	0	0.00147	0	0	0	0	0.02618	0	0.00208	0.0263936	2	Cd6-H40-C20-Cl12-O10	0	0	equal_bothsteps	equal	0	Success at all eik	This sg doesnt have any
489	SIWFOT_FSR	0	0	0	0	0.02639	0	0	0	0	0.00061	0	0	0.00229	-0.00498	-0.01029	0	0	0	0.02639	mm2	Li4-H32-C16-S4-Cl4-O8	0	0	equal_bothsteps	equal	0	Success at all eik	This sg doesnt have any
1259	HAZROP_FSR	0	0	0	-0.02629	0	0	0	0	0	0	-0.02629	0	0	0	0	0	0	-0.00533	0.02629	-42m	C40-Cu12-H40-I8-N8-S8-W2	0	0	equal_bothsteps	equal	0	Success at all eik	Success at all eik
1132	FEQREA_FSR	0	0	0	-0.01199	0	-0.02189	-0.00383	0.01128	-0.0112	0	-0.00757	0	0	0	0	0.0037	0	-0.01093	0.0262873	2	C36-H36-N4-O12-Zn4	0	0	equal_bothsteps	equal	0	Success at all eik	This sg doesnt have any
852	GIRGEV_FSR	0	0	0	0	-0.01827	0	0	0	0	0.02624	0	0	-0.01923	0.00083	-0.00291	0	0	0	0.02624	mm2	Cd4-H16-C12-Br8-N8	0	0	equal_bothsteps	equal	0	Success at all eik	This sg doesnt have any
812	JOLSEK_FSR	0	0	0	-0.0063	0	-0.00668	-0.00174	-0.0008	-0.00145	0	-0.00901	0	0	0	0	0.00274	0	-0.02516	0.0260536	2	Cd2-P4-H68-C60-N4-O12	0	0	equal_bothsteps	equal	0	Success at all eik	This sg doesnt have any
395	APIROH_FSR	0	0	0	-0.00655	0	0	0	0	0	0	-0.02602	0	0	0	0	0	0	0.01559	0.02602	222	C10-F3-H8-In1-N2	0	0	equal_bothsteps	equal	0	Success at all eik	This sg doesnt have any
702	KOTDII_FSR	0	0	0	-0.02573	0	0	0	0	0	0	-0.02332	0	0	0	0	0	0	-0.0047	0.02573	222	Y4-H60-C44-O24	0	0	equal_bothsteps	equal	0	Success at all eik	This sg doesnt have any
103	TAHVOQ_FSR	0	0	0	0.00085	0	-0.0213	-0.00641	-0.0007	-0.014	0	0.01121	0	0	0	0	-0.0218	0	0.00703	0.0257183	2	H40-Pb2-C40-O10	0	0	equal_bothsteps	equal	0	Success at all eik	This sg doesnt have any
593	FICNEK01_FSR	0	0	0	-0.0255	0	0	0	0	0	0	-0.0255	0	0	0	0	0	0	-0.0255	0.0255	23	Na4-H24-Pb4-C24-N4-O24	0	0	equal_bothsteps	equal	0	Success at all eik	Success at all eik
705	DOQMEB_FSR	0	0	0	-0.01912	0	0	0	0	0	0	-0.02542	0	0	0	0	0	0	-0.00719	0.02542	222	C48-H60-O26-Sr2	0	0	equal_bothsteps	equal	0	Success at all eik	This sg doesnt have any
813	PINKOP_FSR	0	0	0	0.00446	0	0.01037	0.00488	0.00114	-0.00626	0	0.02391	0	0	0	0	-0.00222	0	0.01789	0.0252188	2	Cd2-H20-C44-N8-O16-F8	0	0	equal_bothsteps	equal	0	Success at all eik	This sg doesnt have any
437	KERWOW_FSR	0	0	0	-0.02518	0	0	0	0	0	0	0.02518	0	0	0	0	0	0	0	0.02518	422	La4-H24-C40-N20-O28	0	0	equal_bothsteps	equal	0	Success at all eik	Success at all eik
184	LOSGOR01_FSR	0	0	0	0.0233	0	-0.00851	-0.00847	-0.01228	0.0103	0	0.00686	0	0	0	0	-0.00078	0	-0.0122	0.0251109	2	Cu2-H12-C14-N10	0	0	equal_bothsteps	equal	0	Success at all eik	This sg doesnt have any
310	OPISAJ_FSR	0	0	0	-0.00444	0	0.00128	0.00678	-0.00245	0.01294	0	-0.02025	0	0	0	0	-0.00514	0	-0.02402	0.0250894	2	Ba2-H32-C32-N20-O12	0	0	equal_bothsteps	equal	0	Success at all eik	This sg doesnt have any
1048	KOQZAT_FSR	0	0	0	0.02508	0	0	0	0	0	0	-0.02508	0	0	0	0	0	0	0	0.02508	422	Zn4-B16-H40-C12-N8-O28	0	0	equal_bothsteps	equal	0	Success at all eik	Success at all eik
905	XUQQOP_FSR	0	0	0	-0.00544	0.02412	0	0	0	0	-0.02412	-0.00544	0	0.0177	-0.0177	0	0	0	0.00063	0.0250395	-4	C8-Cd1-H16-K2-O24-Zr1	0	0	equal_bothsteps	equal	0	Success at all eik	Success at all eik
635	CIXKEZ02_FSR	0	0	0	0.025	0	0	0	0	0	0	-0.01378	0	0	0	0	0	0	-0.01583	0.025	222	Ni8-H48-C32-O56	16	16	equal_bothsteps	notequal	8	Success at all eik	This sg doesnt have any
1065	OCIBEK_FSR	0	0	0	-0.00809	0	0.0165	0.02471	0.00171	0.00177	0	0.00281	0	0	0	0	-0.0124	0	-0.00489	0.0249907	2	Zn2-H24-C42-N24	0	0	equal_bothsteps	equal	0	Success at all eik	This sg doesnt have any
1397	AXEKOF_FSR	0	0	0	-0.00377	0	-0.00076	-0.01698	0.00293	0.01548	0	-0.00931	0	0	0	0	-0.00634	0	-0.01396	0.0249642	2	Cu2-H40-C50-N4-O6	0	2	notequal_bothsteps	equal	0	Success at all eik	This sg doesnt have any
313	FUFPOL_FSR	0	0	0	0.00299	0	0	0	0	0	0	0.00299	0	0	0	0	0	0	0.02494	0.02494	-42m	C10-Ca1-H10-N8	0	0	equal_bothsteps	equal	0	Success at all eik	Success at all eik
169	LMETZN_FSR	0	0	0	-0.00397	0	-0.01917	-0.01634	0.0068	0.00627	0	-0.01631	0	0	0	0	0.00719	0	-0.0048	0.024871	2	Zn2-H40-C20-S4-N4-O8	0	0	equal_bothsteps	equal	0	Success at all eik	This sg doesnt have any
1312	IYOYUR_FSR	0	0	0	-0.01242	0	0	0	0	0	0	-0.02013	0	0	0	0	0	0	-0.02487	0.02487	222	C28-Cu2-H12-N14	0	0	equal_bothsteps	equal	0	Success at all eik	This sg doesnt have any
1333	PEALCU10_FSR	0	0	0	0.00511	0	0.01408	0.00561	0.00057	-0.00492	0	-0.00195	0	0	0	0	-0.00964	0	-0.0174	0.0248293	2	Cu2-H40-C36-N4-O8	2	2	equal_bothsteps	equal	2	Success at all eik	This sg doesnt have any
272	LIBHUB_FSR	0	0	0	0	-0.01773	0	0	0	0	0.00921	0	0	-0.01512	0.01489	-0.0126	0	0	0	0.0246797	mm2	Sr4-H56-C48-O20	0	0	equal_bothsteps	equal	0	Success at all eik	This sg doesnt have any
940	NENLIB_FSR	0.01701	-0.01701	0	-0.00538	0	0	0	0	0	0	0.00538	-0.01701	0	0	0	0	0	0	0.02465	32	Zn3-Mo3-H24-C12-N6-O12-F12	0	0	equal_bothsteps	equal	0	Success at all eik	Success at all eik
271	BOXZAQ_FSR	0	0	0	0	-0.00411	0	0	0	0	-0.01834	0	0	0.00552	0.00776	0.02257	0	0	0	0.0244968	mm2	H52-Pd4-C52-S4-Br8-N4	0	0	equal_bothsteps	equal	0	Success at all eik	This sg doesnt have any
947	OHUVUK_FSR	0	0	0	-0.00762	0	-0.00493	-0.00506	-0.02212	0.00399	0	-0.00775	0	0	0	0	-0.00545	0	-0.00363	0.024308	2	Zn2-H12-C12-N8	0	0	equal_bothsteps	equal	0	Success at all eik	This sg doesnt have any
775	MEKHOC_FSR	0	0	0	-0.00318	0	-0.01257	-0.00271	-0.00541	0.01122	0	0.003	0	0	0	0	0.01292	0	0.01661	0.0243023	2	Cd2-H40-C36-N4-O8	0	0	equal_bothsteps	equal	0	Success at all eik	This sg doesnt have any
1429	NAWSEM_FSR	0	0	0	-0.0098	0	0	0	0	0	0	-0.02427	0	0	0	0	0	0	-0.00189	0.02427	222	Cu4-Mo12-H32-C32-S8-N8-O40	0	4	notequal_bothsteps	equal	0	Success at all eik	This sg doesnt have any
1456	KIZXIA_FSR	0	0	0	0.00472	0	0	0	0	0	0	0.01938	0	0	0	0	0	0	-0.02422	0.02422	222	Cu4-H28-C36-N4-Cl4	0	0	equal_bothsteps	equal	0	Success at all eik	This sg doesnt have any
870	EJIHEM_FSR	0	0	0	0.01803	0	0	0	0	0	0	0.01294	0	0	0	0	0	0	0.02412	0.02412	222	Cd4-H48-C56-S8-N16-O8	0	0	equal_bothsteps	equal	0	Success at all eik	This sg doesnt have any
21	ODEQOD_FSR	0	0	0	0	0.02377	0	0	0	0	0.02377	0	0	0.00681	0.00681	-0.0051	0	0	0	0.02377	4mm	C20-Cd2-Cl8-H12-I4-N4	0	0	equal_bothsteps	equal	0	Success at all eik	Success at all eik
1437	UZEBAE01_FSR	0	0	0	-0.01725	0	0	0	0	0	0	0.0082	0	0	0	0	0	0	-0.02366	0.02366	222	Cu6-H20-C24-S4-I2-O4	0	0	equal_bothsteps	equal	0	Success at all eik	This sg doesnt have any
229	FEYDAP_FSR	0	0	0	0	0.02361	0	0	0	0	-0.00226	0	0	0.00247	-0.00798	0.01927	0	0	0	0.02361	mm2	Hg8-H48-C48-S4-N8-Cl16	0	0	equal_bothsteps	equal	0	Success at all eik	This sg doesnt have any
1195	MAWVAK_FSR	0	0	0	0.00432	0.01531	0	0	0	0	0.01531	-0.00433	0	0.01019	0.01019	-0.01867	0	0	0	0.0235848	4	Zn4-H56-C44-N8-O16	0	0	equal_bothsteps	equal	0	Success at all eik	Success at all eik
785	SEYFAD01_FSR	0.00442	-0.00177	0.00423	-0.00661	-0.00422	0.00092	0.00111	-0.00295	0.00142	0.00031	-0.00815	-0.01517	-0.00741	0.00725	0.00079	0.00434	-0.01373	-0.00754	0.0232859	1	Cd2-H8-C4-O12	0	0	equal_bothsteps	equal	0	This sg doesnt have any	This sg doesnt have any
606	PEYHAF_FSR	0.00632	0.00534	-0.00013	-0.00315	-0.00574	0.0013	-0.00285	-0.00137	5e-05	1e-05	0.00405	-0.00412	-0.00117	0.00517	-0.00025	0.00662	-0.0198	-0.00652	0.0232817	1	Ni2-H38-C34-N10-O10	4	4	equal_bothsteps	notequal	0	This sg doesnt have any	This sg doesnt have any
1405	XOVPII_FSR	0.00056	0.0012	0.00087	0.01539	-0.00016	-0.00075	-0.00044	0.00021	0.00034	-6e-05	0.00474	0.0002	9e-05	0.00015	0.00016	0.0004	2e-05	0.02322	0.0232341	222	Cu4-H28-C32-N12-O8	0	2	notequal_bothsteps	notequal	2	Success at all eik	This sg doesnt have any
911	LUGLOO_FSR	0.00684	-0.00684	0	-0.0211	0	0	0	0	0	0	0.0211	-0.00684	0	0	0	0	0	0	0.0232117	32	Cd6-H24-C36-N48	0	0	equal_bothsteps	equal	0	Success at all eik	Success at all eik
301	CAFUMT01_FSR	0	0	0	0	0.01525	0	0	0	0	0.00463	0	0	0.00803	-0.0114	0.01853	0	0	0	0.0231906	mm2	Ca4-H32-C16-O28	0	0	equal_bothsteps	equal	0	Success at all eik	This sg doesnt have any
462	PEKKEW_FSR	0	0	0	-0.02318	0	0	0	0	0	0	0.02318	0	0	0	0	0	0	0	0.02318	622	K3-Sc3-H12-C12-O30	0	0	equal_bothsteps	equal	0	Success at all eik	Success at all eik
936	QEKBEO_FSR	0	0	0	0	-0.00957	0	0	0	0	0.00617	0	0	-0.01122	-0.00291	0.02	0	0	0	0.0231162	mm2	C28-Cd6-H16-N20-O4-S12	0	0	equal_bothsteps	equal	0	Success at all eik	This sg doesnt have any
935	MOHMUT_FSR	0	0	0	0	-0.01845	0	0	0	0	0.01845	0	0	-0.0163	0.0163	0	0	0	0	0.0230517	-42m	C40-Cd8-Cl8-H24-N16-O16	0	0	equal_bothsteps	equal	0	Success at all eik	Success at all eik
250	IJOMOJ03_FSR	-0.00015	-0.00022	-1e-05	-0.00012	-0.00026	0.00034	-2e-05	0.0001	0.00012	-0.00593	5e-05	0.00013	0.01536	-0.01344	-0.01062	0.00015	-0.00024	6e-05	0.02301	mm2	Mn12-H24-C24-O48	30	60	notequal_bothsteps	equal	30	Success at all eik	This sg doesnt have any
958	HIQPII_FSR	0	0	0	0.00919	0	0	0	0	0	0	0.00919	0	0	0	0	0	0	0.02283	0.02283	-42m	Zn2-H24-C20-N8	0	0	equal_bothsteps	equal	0	Success at all eik	Success at all eik
1367	MGPHCU_FSR	0	0	0	-0.02283	0	0	0	0	0	0	-0.01749	0	0	0	0	0	0	-0.01044	0.02283	222	Mg2-Cu2-H32-C32-O24	2	2	equal_bothsteps	equal	2	Success at all eik	This sg doesnt have any
460	XIJXAS_FSR	0	0	0	-0.00498	0	0	0	0	0	0	-0.01471	0	0	0	0	0	0	-0.02269	0.02269	222	K4-H20-C16-O24	0	0	equal_bothsteps	equal	0	Success at all eik	This sg doesnt have any
693	JIPYEP_FSR	0	0	0	0.00659	0	-0.00499	-0.01345	-7e-05	-0.00353	0	-0.00888	0	0	0	0	0.02127	0	-0.00287	0.0226756	2	Sn4-P2-H64-C30-N2-O8	0	0	equal_bothsteps	equal	0	Success at all eik	This sg doesnt have any
627	CUZJOX_FSR	0	0	0	-0.02265	0	0	0	0	0	0	-0.02265	0	0	0	0	0	0	-0.02265	0.02265	23	C48-H24-O24-Rb4-Sn4	0	0	equal_bothsteps	equal	0	Success at all eik	Success at all eik
1198	EMOTEG_FSR	0	0	0	0.01273	-0.0056	0	0	0	0	-0.0056	-0.01273	0	-0.01436	-0.01436	0.00972	0	0	0	0.0225144	4	Zn4-H56-C40-N8-O24	0	0	equal_bothsteps	equal	0	Success at all eik	Success at all eik
1207	BIYTEJ_FSR	0	0	0	-0.01829	-0.01296	0	0	0	0	-0.01292	0.01832	0	0.00195	0.00195	0.00567	0	0	0	0.0224419	6	Zn6-H12-C36-N60	0	0	equal_bothsteps	equal	0	Success at all eik	Success at all eik
1210	PEWDEC_FSR	0	0	0	0.01412	0	-0.00586	-0.01685	0.01155	0.00112	0	0.00904	0	0	0	0	0.00397	0	0.02057	0.0223674	2	Zn4-H56-C40-O16	0	0	equal_bothsteps	equal	0	Success at all eik	This sg doesnt have any
1337	MOJFIA_FSR	0	0	0	-0.02235	0	0	0	0	0	0	0.00128	0	0	0	0	0	0	-0.0093	0.02235	222	Cu4-H48-C28-S8-N16	0	4	notequal_bothsteps	equal	0	Success at all eik	This sg doesnt have any
1284	DORWEO_FSR	0	0	0	0.01167	0	0.003	0.01295	0.00586	-0.01613	0	0.00581	0	0	0	0	-0.01125	0	0.01888	0.0223333	2	Cu2-H40-C32-Br4-N16	0	2	notequal_bothsteps	equal	0	Success at all eik	This sg doesnt have any
1121	EXOKOR01_FSR	0	0	0	0.0093	0	0.01135	0.00795	-0.00743	0.01448	0	0.00643	0	0	0	0	0.0078	0	0.01479	0.0221358	2	C18-H30-O24-Zn3	0	0	equal_bothsteps	equal	0	Success at all eik	This sg doesnt have any
225	GIKQEY_FSR	0	0	0	0.01657	0	0.01077	0.01239	-0.01303	0.01211	0	0.00445	0	0	0	0	0.00834	0	-0.00155	0.0221302	2	Cd2-H52-C44-N12-O8	0	0	equal_bothsteps	equal	0	Success at all eik	This sg doesnt have any
707	BOSGIA_FSR	0	0	0	0	0.00417	0	0	0	0	0.00681	0	0	0.01895	-0.01111	0.00225	0	0	0	0.0220816	mm2	C4-H16-N24-O16-Sr4	0	0	equal_bothsteps	equal	0	Success at all eik	This sg doesnt have any
1409	WESRIW_FSR	0	0	0	0.02205	0	0	0	0	0	0	-0.00207	0	0	0	0	0	0	0.00694	0.02205	222	Cu4-H40-C32-N8-Cl4-O4	0	0	equal_bothsteps	equal	0	Success at all eik	This sg doesnt have any
736	ODEQIX01_FSR	0	0	0	0	0.02194	0	0	0	0	-0.02194	0	0	0.01156	-0.01156	0	0	0	0	0.02194	-42m	Cd2-H36-C28-Br4-N4	0	0	equal_bothsteps	equal	0	Success at all eik	Success at all eik
720	FEJGEH_FSR	-0.00616	-0.00415	0.00647	-0.00352	0.01269	-0.00101	0.00356	-0.01337	-0.00038	-0.00234	-0.00809	0.00404	0.01201	0.00527	-0.0123	0.00279	0.00599	-0.00562	0.0218234	1	Sn1-H26-C18-N2-Cl2	0	0	equal_bothsteps	equal	0	This sg doesnt have any	This sg doesnt have any
1307	DORVUD01_FSR	0	0	0	0.01141	0	0.00606	0.01523	0.00415	-0.01409	0	0.00521	0	0	0	0	-0.00695	0	0.01879	0.021791	2	Cu2-H40-C32-N16-Cl4	0	2	notequal_bothsteps	equal	0	Success at all eik	This sg doesnt have any
934	CIJVOH_FSR	0	0	0	-0.02152	0	0	0	0	0	0	0.01307	0	0	0	0	0	0	0.00935	0.02152	222	Cd8-H56-C16-S4-O60	0	0	equal_bothsteps	equal	0	Success at all eik	This sg doesnt have any
332	EGAHOK_FSR	0	0	0	0.0212	0	0	0	0	0	0	0.01812	0	0	0	0	0	0	0.01893	0.0212	222	Bi4-H60-C56-O4	0	0	equal_bothsteps	equal	0	Success at all eik	This sg doesnt have any
1107	EHETER01_FSR	0.01333	-0.01333	0	-0.0091	0	0	0	0	0	0	0.0091	-0.01333	0	0	0	0	0	0	0.0209329	32	Zn3-H42-C30-N12	0	0	equal_bothsteps	equal	0	Success at all eik	Success at all eik
431	PIGPUQ01_FSR	-0.00212	0.00156	0.00339	-0.0034	-0.00247	-0.00716	-0.00287	-0.01946	0.00452	0.00173	-0.00351	0.00058	0.00062	0.00274	2e-05	-0.00165	0.00122	-0.00311	0.0208222	1	Li2-H18-C12-O16	0	0	equal_bothsteps	equal	0	This sg doesnt have any	This sg doesnt have any
1160	FINQEA_FSR	0	0	0	-0.0208	0	0	0	0	0	0	-0.00951	0	0	0	0	0	0	0.01	0.0208	222	Zn4-H64-C40-N8-Cl8-O16	0	0	equal_bothsteps	equal	0	Success at all eik	This sg doesnt have any
478	CUZJIR_FSR	0	0	0	-0.02071	0	0	0	0	0	0	-0.02071	0	0	0	0	0	0	-0.02071	0.02071	23	C48-H24-K4-O24-Sn4	0	0	equal_bothsteps	equal	0	Success at all eik	Success at all eik
774	RAVLUX_FSR	-0.00112	0.00218	-0.00644	0	-0.00655	0	0	0	0	-0.01445	0	0.01236	0.00254	-0.00074	0.0168	0	0.00754	0	0.0206068	m	C38-Cd2-H42-N4-O12-P2	0	0	equal_bothsteps	equal	0	Success at all eik	This sg doesnt have any
1002	EBAVAG_FSR	0	0	0	-0.01732	0	0	0	0	0	0	-0.01215	0	0	0	0	0	0	0.02053	0.02053	222	Zn2-H26-C38-S4-N14-O4	0	0	equal_bothsteps	equal	0	Success at all eik	This sg doesnt have any
868	ROGROV_FSR	0	0	0	0	-0.01361	0	0	0	0	-0.02048	0	0	-0.01017	0.00281	0.00662	0	0	0	0.02048	mm2	C64-Cd4-H48-N8-O24	0	0	equal_bothsteps	equal	0	Success at all eik	This sg doesnt have any
424	TUFKAH_FSR	0	0	0	0.01677	0	0	0	0	0	0	0.02047	0	0	0	0	0	0	-0.00274	0.02047	222	Hg4-H16-C24-Se4-N8-Cl8	0	0	equal_bothsteps	equal	0	Success at all eik	This sg doesnt have any
1294	PEGTUS02_FSR	-0.01822	-0.00014	-0.00129	-0.00267	-0.00448	-0.00321	-0.00262	0.00447	0.00305	-0.00422	-0.00404	0.00114	-0.00475	-0.00181	-0.00064	5e-05	-0.00283	-0.00256	0.0204291	1	Cu2-P6-H38-C28-N2-O20	2	2	equal_bothsteps	equal	2	This sg doesnt have any	This sg doesnt have any
534	HIVQAG_FSR	0	0	0	-0.00217	0	-0.00266	0.00254	0.0145	0.0131	0	0.00465	0	0	0	0	-0.00252	0	-0.0081	0.0202468	2	Mn4-H32-C48-N8-O16	20	10	notequal_bothsteps	equal	20	Success at all eik	This sg doesnt have any
72	KOGBUF_FSR	0	0	0	0	0.00124	0	0	0	0	0.02023	0	0	0.00443	0.00289	-0.00052	0	0	0	0.02023	mm2	K4-H12-C12-N16-O20	0	0	equal_bothsteps	equal	0	Success at all eik	This sg doesnt have any
518	PIHRUU_FSR	0	0	0	0.01498	0	0	0	0	0	0	-0.00473	0	0	0	0	0	0	0.02016	0.02016	222	C8-H8-Mg2-O12	0	0	equal_bothsteps	equal	0	Success at all eik	This sg doesnt have any
869	INODUL_FSR	0	0	0	0	0.01871	0	0	0	0	0.01713	0	0	0.00898	-0.01037	-0.01464	0	0	0	0.0200626	mm2	Cd4-H36-C40-N12-O24	0	0	equal_bothsteps	equal	0	Success at all eik	This sg doesnt have any
884	PAYMIN_FSR	0	0	0	-0.00654	0	0	0	0	0	0	0.02	0	0	0	0	0	0	0.01444	0.02	222	Cd4-H48-C36-N16-Cl8	0	0	equal_bothsteps	equal	0	Success at all eik	This sg doesnt have any
216	QAHKUH_FSR	0	0	0	0	0.01202	0	0	0	0	-0.01739	0	0	0.01557	-0.00678	-0.01044	0	0	0	0.0199346	mm2	C56-Cd2-Cl12-H40-N8-O8	0	0	equal_bothsteps	equal	0	Success at all eik	This sg doesnt have any
382	DUKXEO_FSR	0	0	0	-0.0195	0	0	0	0	0	0	0.01949	0	0	0	0	0	0	0	0.0195	422	Co4-H56-C44-N16	12	12	equal_bothsteps	equal	12	Success at all eik	Success at all eik
913	AVEROJ_FSR	0	0	0	-0.01943	0	0	0	0	0	0	0.01944	0	0	0	0	0	0	0	0.01944	622	Cd6-H12-C12-N18-Cl6	0	0	equal_bothsteps	equal	0	Success at all eik	Success at all eik
1079	GUGWAI_FSR	0	0	0	-0.01091	0	-0.01447	0.01412	-0.00555	0.0041	0	-0.00388	0	0	0	0	0.00646	0	0.00371	0.0194021	2	Zn2-H56-C40-N4-O14	0	0	equal_bothsteps	equal	0	Success at all eik	This sg doesnt have any
854	KOGHEU_FSR	0	0	0	-0.01572	0	0	0	0	0	0	0.00898	0	0	0	0	0	0	-0.01938	0.01938	222	Cd4-H16-C16-O20	0	0	equal_bothsteps	equal	0	Success at all eik	This sg doesnt have any
1361	MARFUH_FSR	0	0	0	-0.00818	0	0	0	0	0	0	-0.00182	0	0	0	0	0	0	0.01925	0.01925	222	Cu4-H24-C28-S12-I4-O16	0	0	equal_bothsteps	equal	0	Success at all eik	This sg doesnt have any
1188	HESMIE_FSR	0.00341	0.00786	-0.00738	-0.00463	0.00569	-0.00798	-0.0042	0.00621	0.00053	0.00184	-0.00269	0.00301	0.0045	0.00451	-0.00615	0.00492	-0.00101	-0.00942	0.019119	1	Zn8-H48-C48-N4-O30	0	0	equal_bothsteps	equal	0	This sg doesnt have any	This sg doesnt have any
466	BUTCUQ_FSR	0	0	0	-0.00895	0	0	0	0	0	0	-0.01423	0	0	0	0	0	0	-0.01874	0.01874	222	K4-H52-C20-S4-O36	0	0	equal_bothsteps	equal	0	Success at all eik	This sg doesnt have any
1216	REFGUG_FSR	0	0	0	0.00242	0	0	0	0	0	0	-0.01869	0	0	0	0	0	0	0.00672	0.01869	222	Zn4-H40-C44-N24-O8	0	0	equal_bothsteps	equal	0	Success at all eik	This sg doesnt have any
669	MIMREF01_FSR	0	0	0	0.00907	0	0	0	0	0	0	-0.01835	0	0	0	0	0	0	0.00359	0.01835	222	Ni4-H28-C28-N4-O24	8	8	equal_bothsteps	equal	8	Success at all eik	This sg doesnt have any
1384	SAXXAQ_FSR	0.00684	-0.00684	0	-0.01084	-0.01102	-0.00114	-0.00114	0.00114	0	-0.011	0.01083	-0.00684	0.00455	0.00455	0.00549	0	0	0	0.0183066	3	Cu3-P3-H45-C54-S9-Cl3	0	0	equal_bothsteps	equal	0	Success at all eik	Success at all eik
1125	FEBMUV01_FSR	0	0	0	-0.0145	0	0	0	0	0	0	0.0183	0	0	0	0	0	0	-0.00061	0.0183	222	Zn4-H28-C28-N4-O24	0	0	equal_bothsteps	equal	0	Success at all eik	This sg doesnt have any
909	NELMID_FSR	0	0	0	0.01829	0	0	0	0	0	0	0.00659	0	0	0	0	0	0	-0.00187	0.01829	222	Cd8-H36-C44-N12-O32	0	0	equal_bothsteps	equal	0	Success at all eik	This sg doesnt have any
770	TAKREF_FSR	0	0	0	0.01273	0	0.00997	0.01073	-0.00968	0.00354	0	0.00189	0	0	0	0	0.01023	0	-0.00028	0.0182399	2	Cd2-H36-C20-N8-O12	0	0	equal_bothsteps	equal	0	Success at all eik	This sg doesnt have any
640	NIFNIB_FSR	0	0	0	-0.0099	-0.01517	0	0	0	0	0.01517	-0.0099	0	-0.00826	0.00826	0	0	0	-0.00223	0.0181146	-4	C32-Cl1-H32-N4-O4-Ru2	3	3	equal_bothsteps	equal	3	Success at all eik	Success at all eik
1320	PIFDOY_FSR	0	0	0	-0.00655	0	0	0	0	0	0	-0.00823	0	0	0	0	0	0	-0.01807	0.01807	222	Cu4-H56-C24-N8-Cl8	4	4	equal_bothsteps	equal	4	Success at all eik	This sg doesnt have any
1131	IQAGEN_FSR	0	0	0	0	-0.00049	0	0	0	0	-0.00529	0	0	0.00514	-0.01564	0.00713	0	0	0	0.0179406	mm2	C52-H40-N4-O12-Zn2	0	0	equal_bothsteps	equal	0	Success at all eik	This sg doesnt have any
960	DERYAB_FSR	0	0	0	0.00072	0	-0.01453	-0.01158	0.00144	-0.00263	0	0.00702	0	0	0	0	-0.00126	0	0.0104	0.0179171	2	C18-H30-Ni2-O24-Zn1	4	4	equal_bothsteps	equal	4	Success at all eik	This sg doesnt have any
547	WUXMOR02_FSR	0	0	0	0.01783	0	0	0	0	0	0	0.00773	0	0	0	0	0	0	-0.01204	0.01783	222	C10-F3-H8-Mn1-N2	4	4	equal_bothsteps	equal	4	Success at all eik	This sg doesnt have any
797	HEYDUL_FSR	-2e-05	-0.00369	0.00148	0	-0.00544	0	0	0	0	0.01213	0	-0.00516	-0.00919	0.01305	-0.00637	0	0.00191	0	0.0177755	m	Cd2-H40-C34-N8-O10	0	0	equal_bothsteps	equal	0	Success at all eik	This sg doesnt have any
50	DONNEA_FSR	0.00389	-0.01181	-0.00049	0	-0.00508	0	0	0	0	-0.00278	0	-0.00391	0.00099	-0.00831	0.0068	0	-0.00759	0	0.017735	m	C16-Ga2-H10-O10	0	0	equal_bothsteps	equal	0	Success at all eik	This sg doesnt have any
1046	FIRGIW_FSR	0	0	0	-0.00143	0	0	0	0	0	0	-0.01768	0	0	0	0	0	0	0.00223	0.01768	222	Zn4-H24-C16-N4-Cl4-O16	0	0	equal_bothsteps	equal	0	Success at all eik	This sg doesnt have any
894	PORZON_FSR	0.00391	0.00875	-0.0017	0	-0.0139	0	0	0	0	0.00466	0	0.01281	-0.00899	0.00074	0.01024	0	-0.00647	0	0.0176383	m	C48-Cd4-H56-N4-O24	0	0	equal_bothsteps	equal	0	Success at all eik	This sg doesnt have any
29	UFIKAX01_FSR	-0.00936	-0.00089	0.00142	0	0.00069	0	0	0	0	-0.01148	0	0.00854	-0.0104	0.00482	-0.00671	0	0.00978	0	0.0175888	m	C12-Cs4-H8-N12-S12	0	0	equal_bothsteps	equal	0	Success at all eik	This sg doesnt have any
1443	LENSED_FSR	0	-0.00015	-8e-05	0.00072	1e-05	-0.00481	0.00429	-0.00277	-0.0167	8e-05	0.00202	4e-05	-0.0001	-0.00018	0.00016	-0.00987	8e-05	0.01132	0.0175842	2	C36-Cl4-Cu4-H44-N8-O8	2	4	notequal_bothsteps	equal	2	Success at all eik	This sg doesnt have any
1171	OQOMAK_FSR	0	0	0	0.00897	0	0	0	0	0	0	-0.00478	0	0	0	0	0	0	0.01758	0.01758	222	Zn4-H20-C4-N20-O4-F8	0	0	equal_bothsteps	equal	0	Success at all eik	This sg doesnt have any
488	AGALUR_FSR	0	0	0	-0.0099	0	0	0	0	0	0	0.01754	0	0	0	0	0	0	0.00399	0.01754	222	Mg4-H56-C24-O44	0	0	equal_bothsteps	equal	0	Success at all eik	This sg doesnt have any
713	PEPLEC_FSR	0	0	0	0.01338	0	0	0	0	0	0	0.00091	0	0	0	0	0	0	-0.01746	0.01746	222	V4-H44-C56-N4-O20	3	0	notequal_bothsteps	notequal	2	Success at all eik	This sg doesnt have any
507	GEWKAW_FSR	0	0	0	0.01664	0	0	0	0	0	0	0.01742	0	0	0	0	0	0	0.00521	0.01742	222	Mg2-H28-C24-N4-O16	0	0	equal_bothsteps	equal	0	Success at all eik	This sg doesnt have any
221	QEKYOX_FSR	0	0	0	-0.01232	0	-0.01169	-0.0014	0.00365	0.00172	0	-0.00863	0	0	0	0	0.00485	0	-0.0077	0.0171114	2	Cd2-H48-C40-S4-N16	0	0	equal_bothsteps	equal	0	Success at all eik	This sg doesnt have any
698	FAQLER_FSR	0	0	0	-0.00971	0	0	0	0	0	0	0.00542	0	0	0	0	0	0	0.01705	0.01705	422	C32-H16-O20-V4	8	8	equal_bothsteps	equal	8	Failed at e36	Failed at e25
1128	WOTNUQ_FSR	-0.01184	0.01184	0	0.00286	0	0	0	0	0	0	-0.00286	0.01184	0	0	0	0	0	0	0.0169868	32	Zn3-H12-C6-O18	0	0	equal_bothsteps	equal	0	Success at all eik	Success at all eik
1419	HIFZUS_FSR	0	0	0	0.01682	0	0	0	0	0	0	-0.01681	0	0	0	0	0	0	0.00111	0.01682	422	Cu8-H24-C32-I8-N16	0	0	equal_bothsteps	equal	0	Failed at e36	Success at all eik
1360	DOPKOK_FSR	0	0	0	0.00118	0	0.00795	0.01242	0.003	0.00321	0	0.00463	0	0	0	0	0.00444	0	0.01408	0.0167724	2	Cu2-H28-C32-N20-O10	2	2	equal_bothsteps	equal	2	Success at all eik	This sg doesnt have any
1085	DIQXOQ_FSR	0	0	0	0.00212	0	0	0	0	0	0	-0.01218	0	0	0	0	0	0	-0.01673	0.01673	222	Zn4-H36-C36-N4-O20	0	0	equal_bothsteps	equal	0	Success at all eik	This sg doesnt have any
891	QAWSUD_FSR	0	0	0	-0.00529	0	-0.00857	-0.00865	-0.00521	-0.01025	0	-0.00846	0	0	0	0	-0.00898	0	-0.00602	0.0166913	2	Cd4-H40-C40-N20-Cl12-O4	0	0	equal_bothsteps	equal	0	Success at all eik	This sg doesnt have any
407	IDIGAF_FSR	0	0	0	-0.01657	0	0	0	0	0	0	-0.00306	0	0	0	0	0	0	-0.00337	0.01657	222	Hg4-H32-C36-N12-Cl4-O8	0	0	equal_bothsteps	equal	0	Success at all eik	This sg doesnt have any
469	BOSJUQ_FSR	0	0	0	-0.00628	0	0	0	0	0	0	-0.01651	0	0	0	0	0	0	-0.00315	0.01651	222	K4-H44-C32-S4-N8-O8	0	0	equal_bothsteps	equal	0	Success at all eik	This sg doesnt have any
528	IJAZIC_FSR	0	0	0	0.01648	0	0	0	0	0	0	0.00218	0	0	0	0	0	0	0.00902	0.01648	222	Li4-H64-C40-N4	0	0	equal_bothsteps	equal	0	Success at all eik	This sg doesnt have any
1175	JOMWAJ01_FSR	0	0	0	-0.01646	0	0	0	0	0	0	0.01646	0	0	0	0	0	0	0	0.01646	422	Zn4-H32-C48-N8-O16	0	0	equal_bothsteps	equal	0	Success at all eik	Success at all eik
117	OBAGOQ_FSR	0	0	0	-0.00695	0	-0.01073	0.00121	-0.01013	-0.01226	0	0.00391	0	0	0	0	0.01201	0	-0.00558	0.0164218	2	La2-H24-C36-N6-O12	0	0	equal_bothsteps	equal	0	Success at all eik	This sg doesnt have any
616	KOGCAM_FSR	0	0	0	0	0.00883	0	0	0	0	-0.01625	0	0	0.00227	-0.00031	-0.01237	0	0	0	0.01625	mm2	Na4-H12-C12-N16-O20	0	0	equal_bothsteps	equal	0	Success at all eik	This sg doesnt have any
298	DOFWUR_FSR	0	0	0	0	0.00578	0	0	0	0	0.01125	0	0	-0.00078	0.00135	-0.01611	0	0	0	0.0161853	mm2	Ba2-C20-H24-N12-O32	0	0	equal_bothsteps	equal	0	Success at all eik	This sg doesnt have any
1169	ONOCOL01_FSR	0	0	0	-0.0161	0	0	0	0	0	0	0.0161	0	0	0	0	0	0	0	0.0161	422	Zn4-H40-C48-N16-O16	0	0	equal_bothsteps	equal	0	Success at all eik	Success at all eik
316	WENSIS_FSR	0	0	0	-0.00629	0.0144	0	0	0	0	-0.0144	-0.00629	0	0.00999	-0.00999	0	0	0	-0.00156	0.0157138	-4	C8-Ca1-H16-K2-O24-Zr1	0	0	equal_bothsteps	equal	0	Success at all eik	Success at all eik
1416	PIGZOV_FSR	0	0	0	-0.01546	0	0	0	0	0	0	-0.00467	0	0	0	0	0	0	-0.01026	0.01546	222	Cu4-H64-C32-N8-Cl4	0	0	equal_bothsteps	equal	0	Success at all eik	This sg doesnt have any
333	CAFORM13_FSR	0	0	0	0.01524	0	0	0	0	0	0	-0.01524	0	0	0	0	0	0	0	0.01524	422	Ca4-H8-C8-O16	0	0	equal_bothsteps	equal	0	Success at all eik	Success at all eik
249	EYUKOZ_FSR	-9e-05	0	-3e-05	-0.00203	0.00981	4e-05	1e-05	-0.0001	2e-05	0.00964	0.00214	-9e-05	0.0096	0.00943	-0.00698	9e-05	-4e-05	3e-05	0.0151601	4	Mn8-P8-H40-C20-N4-O48	10	40	notequal_bothsteps	equal	10	Success at all eik	Success at all eik
551	ANAMOT_FSR	0	0	0	0.00357	0	0	0	0	0	0	-0.00211	0	0	0	0	0	0	-0.01509	0.01509	222	Mn4-H48-C32-S8-N8-O16	20	20	equal_bothsteps	equal	20	Success at all eik	This sg doesnt have any
434	ALIHIN_FSR	-0.0032	0.00217	-0.00282	0	0.00739	1e-05	0	1e-05	-2e-05	0.00269	0	-0.00212	-0.00777	-0.00216	0.00784	1e-05	0.00858	-1e-05	0.0150211	m	C26-H22-Li2-N8	0	0	equal_bothsteps	equal	0	Success at all eik	This sg doesnt have any
1158	PIBLAQ_FSR	0	0	0	-0.01493	0	0	0	0	0	0	0.00868	0	0	0	0	0	0	-0.0089	0.01493	222	Zn4-H60-C40-N8-Cl4-O16	0	0	equal_bothsteps	equal	0	Success at all eik	This sg doesnt have any
1234	PIZQEW_FSR	-0.01213	-0.00272	-0.0012	-0.00252	-0.00306	0.00343	0.0027	0.0017	-0.0024	-0.00067	0.00055	0.00311	-0.00087	0.00519	0.00223	0.00471	0.00902	0.00028	0.0145994	1	Cu2-H40-C30-N10-O6	0	0	equal_bothsteps	equal	0	This sg doesnt have any	This sg doesnt have any
1184	MOXFUB_FSR	0	0	0	0.0145	0	0	0	0	0	0	-0.00093	0	0	0	0	0	0	-0.00119	0.0145	222	Zn4-H64-C44-I8-N16	0	0	equal_bothsteps	equal	0	Success at all eik	This sg doesnt have any
230	GAMTUM_FSR	0	0	0	-0.01147	0	-0.00764	-0.00246	0.00122	-0.00034	0	-0.00316	0	0	0	0	0.00847	0	-0.0095	0.0142907	2	In4-H68-C60-S8	0	0	equal_bothsteps	equal	0	Success at all eik	This sg doesnt have any
147	EQADEH_FSR	0	0	0	0	-0.00784	0	0	0	0	0.00455	0	0	-0.005	-0.00485	0.01238	0	0	0	0.0142052	mm2	C40-H32-N8-O12-W4	0	0	equal_bothsteps	equal	0	Success at all eik	This sg doesnt have any
454	EWOYUL_FSR	0	0	0	0.01394	0	0	0	0	0	0	-0.00626	0	0	0	0	0	0	0.00279	0.01394	222	K4-H32-Pt4-C20-N4-Cl8-O8	0	0	equal_bothsteps	equal	0	Success at all eik	This sg doesnt have any
261	FIDWIY_FSR	-0.00834	0.00102	0.00904	0	-0.00563	0	0	0	0	-0.00283	0	-0.00306	-0.00125	0.00561	0.00096	0	0.00463	0	0.0135656	m	C48-H48-Li4-N4-S4	0	0	equal_bothsteps	equal	0	Success at all eik	This sg doesnt have any
1346	PONHEG_FSR	0	0	0	-0.0021	0	-0.01331	-0.0045	0.00162	-0.00773	0	-0.005	0	0	0	0	0.00268	0	-0.00011	0.0134783	2	Cu2-Hg4-H56-C24-N16-Cl12-O8	2	2	equal_bothsteps	equal	2	Success at all eik	This sg doesnt have any
1099	EHETER_FSR	0	0	0	0.00864	-0.00819	0	0	0	0	-0.00819	-0.00864	0	0.00152	0.00152	0.0131	0	0	0	0.0132752	6	Zn3-H42-C30-N12	0	0	equal_bothsteps	equal	0	Success at all eik	Success at all eik
526	MUQWOM_FSR	0	0	0	-0.01325	0	0	0	0	0	0	-0.0131	0	0	0	0	0	0	0.00806	0.01325	222	Li4-H28-C56-O16	0	0	equal_bothsteps	equal	0	Success at all eik	This sg doesnt have any
694	PEPLIG_FSR	0	0	0	0.01317	0	0	0	0	0	0	-0.00293	0	0	0	0	0	0	-0.01106	0.01317	222	V4-H32-C48-S4-O20	3	0	notequal_bothsteps	notequal	2	Success at all eik	This sg doesnt have any
621	OWUVUY_FSR	0	0	0	0.01306	0	0	0	0	0	0	-0.00907	0	0	0	0	0	0	0.00975	0.01306	222	Br4-C20-H40-Na4-O24	0	0	equal_bothsteps	equal	0	Success at all eik	This sg doesnt have any
1007	TAKRIJ_FSR	0	0	0	-0.00148	0	0.00519	-0.00715	0.0025	0.00759	0	-0.00729	0	0	0	0	-0.0018	0	-0.00661	0.0129663	2	Zn2-H36-C20-N8-O12	0	0	equal_bothsteps	equal	0	Success at all eik	This sg doesnt have any
585	NAWYOA_FSR	0	0	0	0.01286	0	0	0	0	0	0	-0.00424	0	0	0	0	0	0	0.00608	0.01286	222	Na4-H44-C16-N72-O12	0	0	equal_bothsteps	equal	0	Success at all eik	This sg doesnt have any
820	NAMDAH_FSR	0	0	0	-0.01135	0	0	0	0	0	0	0.0127	0	0	0	0	0	0	-0.00201	0.0127	222	Cd4-H36-C20-S4-N4-O20	0	0	equal_bothsteps	equal	0	Success at all eik	This sg doesnt have any
1232	FIZSUE_FSR	0	0	0	-0.01262	0	0	0	0	0	0	0.00159	0	0	0	0	0	0	-0.00683	0.01262	222	Cu16-H64-C32-S8-I16	0	0	equal_bothsteps	equal	0	Success at all eik	This sg doesnt have any
444	YECPEE_FSR	-0.00274	0.00315	-0.0021	0	-0.00146	0	0	0	0	0.00647	0	0.00316	0.00233	0.00802	-0.00765	0	-0.00402	0	0.0125283	m	C12-H8-K4-N12-O8	0	0	equal_bothsteps	equal	0	Success at all eik	This sg doesnt have any
1255	JAKROD_FSR	0	0	0	0.01168	0	0	0	0	0	0	0.01252	0	0	0	0	0	0	0.00769	0.01252	222	Cu12-H36-C48-S12-N24	0	0	equal_bothsteps	equal	0	Success at all eik	This sg doesnt have any
1391	CYPYCU10_FSR	0	0	0	-0.00408	0	0	0	0	0	0	0.00741	0	0	0	0	0	0	-0.01241	0.01241	222	Cu4-H16-C28-N12	0	0	equal_bothsteps	equal	0	Success at all eik	This sg doesnt have any
872	LALTIC_FSR	0	0	0	0	-0.01192	0	0	0	0	0.00906	0	0	-0.0082	0.00704	-0.00535	0	0	0	0.0120592	mm2	C64-Cd4-H48-N8-O20-S4	0	0	equal_bothsteps	equal	0	Success at all eik	This sg doesnt have any
769	MEKHUI_FSR	0	0	0	-0.00891	0	-0.00665	0.00305	0.0066	-0.00914	0	-0.00267	0	0	0	0	0.00252	0	0.0032	0.0119804	2	Cd2-H48-C24-N4-O8	0	0	equal_bothsteps	equal	0	Success at all eik	This sg doesnt have any
882	TOFQEM_FSR	0	0	0	0	-0.00242	0	0	0	0	-0.00479	0	0	0.00071	0.00526	-0.01065	0	0	0	0.0118993	mm2	Cd4-H40-C48-N8-O20	0	0	equal_bothsteps	equal	0	Success at all eik	This sg doesnt have any
626	PARMIG_FSR	0	0	0	-0.01185	0	0	0	0	0	0	0.01185	0	0	0	0	0	0	0	0.01185	422	Ni4-H40-C64-N16-O16	8	8	equal_bothsteps	equal	8	Success at all eik	Success at all eik
674	RUFSUI_FSR	0	0	0	0.00042	0	0.00209	0.00575	-0.00928	0.00295	0	0.00278	0	0	0	0	0.00361	0	0.00227	0.0116452	2	Sn4-H64-C44-O24	0	0	equal_bothsteps	equal	0	Success at all eik	This sg doesnt have any
1370	AKAPUX_FSR	0	0	0	0.01157	0	0	0	0	0	0	0.00257	0	0	0	0	0	0	-0.00551	0.01157	222	Cu4-H32-C24-N8-Cl4	0	0	equal_bothsteps	equal	0	Success at all eik	This sg doesnt have any
676	SRFORA06_FSR	0	0	0	-0.01146	0	0	0	0	0	0	0.01146	0	0	0	0	0	0	0	0.01146	422	Sr4-H8-C8-O16	0	0	equal_bothsteps	equal	0	Success at all eik	Success at all eik
634	DORFIA_FSR	0	0	0	0.00374	0	0	0	0	0	0	0.00294	0	0	0	0	0	0	0.0113	0.0113	222	Ni4-H72-C40-O24	8	8	equal_bothsteps	equal	8	Success at all eik	This sg doesnt have any
890	NEBMEP_FSR	0	0	0	0.01125	0	0	0	0	0	0	0.01069	0	0	0	0	0	0	-0.00409	0.01125	222	Cd4-H44-C68-N4-O16	0	0	equal_bothsteps	equal	0	Success at all eik	This sg doesnt have any
490	LICLPY02_FSR	0	0	0	0.0047	0	0	0	0	0	0	0.01085	0	0	0	0	0	0	-0.00342	0.01085	222	Li4-H20-C20-N4-Cl4	0	0	equal_bothsteps	equal	0	Success at all eik	This sg doesnt have any
858	FAPFIN_FSR	0	0	0	-0.00521	0	0	0	0	0	0	-0.00641	0	0	0	0	0	0	-0.01082	0.01082	222	Cd4-H24-C32-S8-N20	0	0	equal_bothsteps	equal	0	Success at all eik	This sg doesnt have any
1206	SARBOE_FSR	0	0	0	-0.01046	0	0	0	0	0	0	-0.00204	0	0	0	0	0	0	-0.01057	0.01057	222	Zn4-H40-C48-N16-O16	0	0	equal_bothsteps	equal	0	Success at all eik	This sg doesnt have any
296	FUSPIS10_FSR	0	0	0	0.01053	0	0	0	0	0	0	0.00583	0	0	0	0	0	0	0.00582	0.01053	222	Ca4-H64-C40-O28	0	0	equal_bothsteps	equal	0	Success at all eik	This sg doesnt have any
599	HORXAN_FSR	0	0	0	-0.00848	0	0	0	0	0	0	-0.0069	0	0	0	0	0	0	0.01051	0.01051	222	Na4-B4-H48-C36-N24-O4	0	0	equal_bothsteps	equal	0	Success at all eik	This sg doesnt have any
270	OQETEK_FSR	0	0	0	-0.0025	0.00792	0	0	0	0	0.0079	0.00248	0	0.00248	0.00248	-0.00981	0	0	0	0.0104181	4	Yb4-H36-C60-O28	0	0	equal_bothsteps	equal	0	Success at all eik	Success at all eik
904	YIWKUN_FSR	-0.00718	0.00307	0.00223	-0.00141	0.0046	-0.00034	-0.0018	-0.00089	-0.001	0.0036	0.00549	0.00081	0.00316	-0.00067	0.00314	-0.00148	0.00012	0.00192	0.0103893	1	Cd1-H40-C28-S2-N4-O10	0	0	equal_bothsteps	equal	0	This sg doesnt have any	This sg doesnt have any
643	OLUNEO_FSR	0	0	0	0.00608	0	0	0	0	0	0	0.01029	0	0	0	0	0	0	-0.00204	0.01029	222	C68-H64-N10-Rh2	0	0	equal_bothsteps	equal	0	Success at all eik	This sg doesnt have any
851	WUBWAT_FSR	0	0	0	-0.0068	0	0	0	0	0	0	0.01017	0	0	0	0	0	0	0.0024	0.01017	222	Cd4-H36-C20-Br8-N4-O8	0	0	equal_bothsteps	equal	0	Success at all eik	This sg doesnt have any
71	FEJKAI_FSR	0.00718	0.00595	0.00202	0.0013	7e-05	-0.00023	0.00137	-0.00247	0.00182	0.00179	-0.00151	0.00153	0.00168	0.00029	0.00118	-0.00018	-0.00041	0.00046	0.00977557	2/m	Mn2-Hg2-H24-C24-S8-N16	4	2	notequal_bothsteps	equal	4	Centro as per csd	Centro as per csd
802	FEQSOK_FSR	0	0	0	-0.00975	0	0	0	0	0	0	0.00975	0	0	0	0	0	0	0	0.00975	422	C52-Cd2-H36-N4-O16	0	0	equal_bothsteps	equal	0	Success at all eik	Success at all eik
1029	FAYQUS_FSR	0.00282	0.00012	-0.003	0	0.00844	0	0	0	0	0.00396	0	-0.00299	0.00226	0.00265	-0.00456	0	-0.00122	0	0.00948817	m	C28-H28-N4-O8-S4-Zn2	0	0	equal_bothsteps	equal	0	Success at all eik	This sg doesnt have any
384	TAKTEH_FSR	0	0	0	-0.00939	0	0	0	0	0	0	0.00939	0	0	0	0	0	0	0	0.00939	422	C32-Ga4-H16-O20	0	0	equal_bothsteps	equal	0	Success at all eik	Success at all eik
917	LEQQUU_FSR	0	0	0	0.00227	0	0	0	0	0	0	0.0092	0	0	0	0	0	0	-0.0052	0.0092	222	Cd6-H16-C20-Br12-N4	0	0	equal_bothsteps	equal	0	Success at all eik	This sg doesnt have any
428	TUPSIG01_FSR	-0.00516	-0.00098	-0.0032	0	0.00618	0	0	0	0	0.00517	0	0.0001	-0.0014	-0.00089	-0.00315	0	0.00102	0	0.00919163	m	C24-H48-I6-K2-O12	0	0	equal_bothsteps	equal	0	Success at all eik	This sg doesnt have any
1446	FURQAL_FSR	0	0	0	0.00093	0	0.00529	0.0018	-0.00517	0.00037	0	0.00718	0	0	0	0	-0.00011	0	-0.00063	0.00903649	2	Cu4-H64-C56-N8-O12	0	0	equal_bothsteps	notequal	2	Success at all eik	This sg doesnt have any
433	GOJDUG_FSR	0	0	0	0.009	0	0	0	0	0	0	0.00585	0	0	0	0	0	0	-0.0057	0.009	222	K4-H16-C24-S4-N12-O12	0	0	equal_bothsteps	equal	0	Success at all eik	This sg doesnt have any
684	KIYMAI01_FSR	0	0	0	-0.00168	0	0	0	0	0	0	-0.00643	0	0	0	0	0	0	-0.00896	0.00896	222	Sr4-H52-C60-N4-O20	0	0	equal_bothsteps	equal	0	Success at all eik	This sg doesnt have any
572	HAQQIC_FSR	0	0	0	-0.00861	0	0	0	0	0	0	0.00741	0	0	0	0	0	0	-0.00283	0.00861	222	C44-H52-Mo4-N12-O12	0	0	equal_bothsteps	equal	0	Success at all eik	This sg doesnt have any
414	TAKTIL_FSR	0	0	0	-0.00843	0	0	0	0	0	0	0.00843	0	0	0	0	0	0	0	0.00843	422	C44-Ga4-H16-O44	0	0	equal_bothsteps	equal	0	Success at all eik	Success at all eik
844	HOZXOL_FSR	0	0	0	-0.00796	0	0	0	0	0	0	-0.0084	0	0	0	0	0	0	-0.00277	0.0084	222	Br2-C10-Cd4-Cl6-H12-N4-O8	0	0	equal_bothsteps	equal	0	Success at all eik	This sg doesnt have any
510	OVUNOJ_FSR	0	0	0	-0.00038	0	0	0	0	0	0	0.0058	0	0	0	0	0	0	-0.00836	0.00836	222	Li4-H60-C48-N24	0	0	equal_bothsteps	equal	0	Success at all eik	This sg doesnt have any
432	KNATAR23_FSR	0	0	0	0.00098	0	0	0	0	0	0	-8e-05	0	0	0	0	0	0	-0.00813	0.00813	222	K4-Na4-H48-C16-O40	0	0	equal_bothsteps	equal	0	Success at all eik	This sg doesnt have any
471	IFUKIE_FSR	0	0	0	-0.00612	0	0	0	0	0	0	-0.00063	0	0	0	0	0	0	-0.00801	0.00801	222	C24-H44-K4-N16-O20	0	0	equal_bothsteps	equal	0	Success at all eik	This sg doesnt have any
558	ZIFNUA_FSR	0	0	0	-0.00797	0	0	0	0	0	0	0.00797	0	0	0	0	0	0	0	0.00797	422	C44-H36-Mn4-N8-O20	20	20	equal_bothsteps	equal	20	Success at all eik	Success at all eik
220	LOFDOC_FSR	0	0	0	0	0.00237	0	0	0	0	-0.006	0	0	0.00291	-0.00653	0.00308	0	0	0	0.00778431	mm2	Cs8-H16-C16-N48-O16	0	0	equal_bothsteps	equal	0	Success at all eik	This sg doesnt have any
302	NIRPIQ_FSR	0	0	0	0.00771	0	0	0	0	0	0	-0.00771	0	0	0	0	0	0	0	0.00771	422	Al4-C32-H16-O20	0	0	equal_bothsteps	equal	0	Success at all eik	Success at all eik
1264	CUXVEX_FSR	0	0	0	-0.00041	0	0	0	0	0	0	0.00724	0	0	0	0	0	0	-0.00552	0.00724	222	Cu12-H40-C48-I12-N16	0	0	equal_bothsteps	equal	0	Success at all eik	This sg doesnt have any
484	LICDOX01_FSR	0	0	0	0.00093	0	0	0	0	0	0	-0.0071	0	0	0	0	0	0	0.00522	0.0071	222	Li4-H32-C16-Cl4-O8	0	0	equal_bothsteps	equal	0	Success at all eik	This sg doesnt have any
429	PIRNAH01_FSR	0	0	0	0.00657	0	0	0	0	0	0	-0.00228	0	0	0	0	0	0	-0.00224	0.00657	222	Cs4-H16-C32-N8-Cl8-O16	0	0	equal_bothsteps	equal	0	Success at all eik	This sg doesnt have any
292	WOCQIQ_FSR	0	0	0	-0.00306	0	0	0	0	0	0	0.00608	0	0	0	0	0	0	0.00259	0.00608	222	Ca4-H44-C20-N4-Cl8-O12	0	0	equal_bothsteps	equal	0	Success at all eik	This sg doesnt have any
678	BOXMAE_FSR	0	0	0	0.00132	0	0	0	0	0	0	-0.00557	0	0	0	0	0	0	-0.00487	0.00557	222	Sr4-H20-C28-N4-O20	0	0	equal_bothsteps	equal	0	Success at all eik	This sg doesnt have any
1070	VAHWOS01_FSR	0	0	0	0.0008	0	0	0	0	0	0	-0.00134	0	0	0	0	0	0	0.00544	0.00544	222	Zn4-H16-C32-N32	0	0	equal_bothsteps	equal	0	Success at all eik	This sg doesnt have any
416	OWIHUZ_FSR	0	0	0	0.00518	0	0	0	0	0	0	-0.00518	0	0	0	0	0	0	0	0.00518	422	C32-H24-In4-O20	0	0	equal_bothsteps	equal	0	Success at all eik	Success at all eik
695	SEBMER01_FSR	0	0	0	-0.00443	0	0	0	0	0	0	-0.00508	0	0	0	0	0	0	-0.00454	0.00508	222	Sr4-H52-C20-N4-O28	0	0	equal_bothsteps	equal	0	Success at all eik	This sg doesnt have any
307	GOJFIW_FSR	-4e-05	1e-05	0	-0.00288	0	0	0	0	0	0	-0.00288	1e-05	0	0	0	0	2e-05	-0.00472	0.00472013	222	Ba2-Br4-C14-H36-O16	0	0	equal_bothsteps	equal	0	Success at all eik	This sg doesnt have any
919	XUDMUG_FSR	0	0	0	-0.0035	0	-0.00064	-0.00057	-0.0018	0.00011	0	-0.00397	0	0	0	0	-0.00256	0	-0.00171	0.00460957	2	C12-Cd1-H8-I2-N4	0	0	equal_bothsteps	equal	0	Success at all eik	This sg doesnt have any
1316	GABHOH_FSR	0	0	0	-0.00391	0	0	0	0	0	0	-0.00159	0	0	0	0	0	0	0.0046	0.0046	222	Cu4-H12-C16-I8-N8	0	0	equal_bothsteps	equal	0	Success at all eik	This sg doesnt have any
625	NENDAL_FSR	0	0	0	-0.00091	0	0.00439	0.00393	-0.00087	-0.00054	0	-0.00147	0	0	0	0	-0.00064	0	0.00085	0.00458642	2	Ni2-H44-C44-N8-O12	0	0	equal_bothsteps	equal	0	Success at all eik	This sg doesnt have any
385	OTEGOL01_FSR	0	0	0	0.00449	0	0	0	0	0	0	-0.00449	0	0	0	0	0	0	0	0.00449	422	C32-H16-In4-O20	0	0	equal_bothsteps	equal	0	Success at all eik	Success at all eik
614	QQQDHD01_FSR	0	0	0	0	2e-05	0	0	0	0	0.00152	0	0	0.00097	0.0015	-0.0037	0	0	0	0.00410864	mm2	Na8-H16-C32-O16	0	0	equal_bothsteps	equal	0	Success at all eik	This sg doesnt have any
878	FIQZEM_FSR	0	0	0	-0.00101	0	0	0	0	0	0	0.00278	0	0	0	0	0	0	0.00404	0.00404	222	Cd4-H52-C60-N4-O20	0	0	equal_bothsteps	equal	0	Success at all eik	This sg doesnt have any
27	VUTLAY_FSR	0.00033	-0.00068	0.0005	0.00023	1e-05	-0.0027	0.0009	-0.00023	0.00027	0.00047	2e-05	-0.00242	0.00106	0.00029	0.00073	-2e-05	-0.00027	-0.00051	0.00393591	1	V4-Co2-H18-C10-N4-O14	0	2	notequal_bothsteps	notequal	4	This sg doesnt have any	This sg doesnt have any
255	XEQLEM_FSR	0	0	0	0.00373	0	0.00057	-0.00094	0.00078	0.00082	0	-0.00066	0	0	0	0	0.00059	0	0.00133	0.00386284	2	Mg4-H32-C48-N8-O16	0	0	equal_bothsteps	equal	0	Success at all eik	This sg doesnt have any
1124	DOTHUR_FSR	0	0	0	-0.00318	0	0.00147	0.00147	-0.00147	0	0	0.00318	0	0	0	0	0	0	0	0.00379924	32	Zn3-H54-C54-N12-O12	0	0	equal_bothsteps	equal	0	Success at all eik	Success at all eik
550	HUSPUH_FSR	0	0	0	0.00149	0	0	0	0	0	0	0.00119	0	0	0	0	0	0	-0.00312	0.00312	222	Mo8-H40-C28-N24-O24	0	0	equal_bothsteps	equal	0	Success at all eik	This sg doesnt have any
832	YEDVUZ_FSR	0	0	0	0.00083	0	0	0	0	0	0	-0.00305	0	0	0	0	0	0	-9e-05	0.00305	222	Cd4-H28-C20-N4-Cl8-O8	0	0	equal_bothsteps	equal	0	Success at all eik	This sg doesnt have any
1426	CAWXAZ_FSR	0	0	0	0.00278	0	0	0	0	0	0	-0.00297	0	0	0	0	0	0	-0.00025	0.00297	222	Cu8-H48-C48-N24	0	0	equal_bothsteps	equal	0	Success at all eik	This sg doesnt have any
668	PIRMOU_FSR	0	0	0	0.00238	0	0	0	0	0	0	-0.00291	0	0	0	0	0	0	-0.00269	0.00291	222	Rb4-H16-C32-N8-Cl8-O16	0	0	equal_bothsteps	equal	0	Success at all eik	This sg doesnt have any
612	PEDSUN_FSR	0.00094	0.00162	-0.00012	-0.00026	0.00153	0.0002	0.00111	-0.00016	-0.00053	-0.00086	-0.00052	0.00086	0.00178	-0.00018	-0.00031	-0.00111	-0.00033	-0.00025	0.00280862	1	Ni2-H14-C16-S4-N6-O2	4	4	equal_bothsteps	notequal	0	This sg doesnt have any	This sg doesnt have any
440	NOGMIG_FSR	0	0	0	0.0027	0	0	0	0	0	0	-0.0017	1e-05	0	0	0	0	-2e-05	0.00015	0.0027	222	C16-H16-Li16-N64	0	0	equal_bothsteps	equal	0	Success at all eik	This sg doesnt have any
1285	MANZIL_FSR	0.00088	0.00018	2e-05	-0.00042	0.00014	0.00042	-0.00108	6e-05	-0.00097	0.00101	0.00067	7e-05	-0.00079	-0.00017	0.00056	-0.00128	0.00161	0.00095	0.00247803	1	Cu2-H20-C18-N2-O8	0	0	equal_bothsteps	equal	0	This sg doesnt have any	This sg doesnt have any
591	NAHNLA10_FSR	0	0	0	0.00209	0	0	0	0	0	0	0.00209	0	0	0	0	0	0	0.00209	0.00209	23	Na8-H28-C24-N4-O24	0	0	equal_bothsteps	equal	0	Success at all eik	Success at all eik
253	OXUSOQ_FSR	0	0	0	0	-0.00114	0	0	0	0	-0.00048	0	0	-0.00055	-0.00093	0.00143	0	0	0	0.00179229	mm2	Zn4-Mo4-H36-C48-N20-O16	0	0	equal_bothsteps	equal	0	Success at all eik	This sg doesnt have any
1055	KEYSEO_FSR	0	0	0	-0.00172	0	0	0	0	0	0	0.00172	0	0	0	0	0	0	0	0.00172	422	Zn4-H48-C32-N24	0	0	equal_bothsteps	equal	0	Success at all eik	Success at all eik
1385	GISHAS_FSR	0	0	0	0	-2e-05	0	0	0	0	-0.00017	0	0	0.00033	0.00044	0.00114	0	0	0	0.00126574	mm2	Cu4-H56-C28-N8-O20	0	4	notequal_bothsteps	notequal	2	Success at all eik	This sg doesnt have any
1449	YEHBAQ_FSR	-0.00029	-0.00018	-0.00025	8e-05	7e-05	6e-05	0.00038	0.00018	0.0003	4e-05	1e-05	-6e-05	0.00061	0.00015	0.00045	8e-05	-1e-05	-0.0001	0.0010258	1	Cu1-H20-C14-N14-O6	1	1	equal_bothsteps	equal	1	This sg doesnt have any	This sg doesnt have any
40	NAPTEE_FSR	9e-05	-0.00029	8e-05	0	7e-05	0	0	0	0	-0.0004	0	-0.00072	-0.00018	-0.00013	0.00016	0	0.00019	0	0.00082365	m	C16-Cd2-H20-I4-N8	0	0	equal_bothsteps	equal	0	Success at all eik	This sg doesnt have any
393	ORONOA_FSR	0	0	0	0	0.00054	0	0	0	0	-0.00031	0	0	0.00063	-0.00022	-0.00041	0	0	0	0.000783199	mm2	K12-H20-C24-O28	0	0	equal_bothsteps	equal	0	Success at all eik	This sg doesnt have any
1012	JEGCAC_FSR	0.0004	-0.00043	5e-05	0	0.00035	0	0	0	0	-0.00018	0	-0.00056	0.00037	7e-05	0.00028	0	-7e-05	0	0.00071438	m	C40-H32-N4-O8-Zn2	0	0	equal_bothsteps	equal	0	Success at all eik	This sg doesnt have any
711	OPITOY_FSR	-0.00059	0.00019	0.00025	0	0	0	1e-05	0	0	0	2e-05	-2e-05	1e-05	8e-05	-5e-05	1e-05	0.00028	9e-05	0.000668437	222	H12-W8-C8-N12-O24	0	0	equal_bothsteps	equal	0	Success at all eik	This sg doesnt have any
1342	FARVAW_FSR	0.00026	-0.00021	-0.00015	7e-05	0.0001	1e-05	-4e-05	-0.00032	0.00038	-4e-05	0.00021	-0.00015	0.00021	6e-05	-9e-05	0.00032	-0.00014	0.00022	0.000646671	1	Cu2-H40-C36-N8-O8	0	0	equal_bothsteps	equal	0	This sg doesnt have any	This sg doesnt have any
34	DEZMOL_FSR	0	0	0	-0.00025	0	-0.00032	-0.00028	0.00053	6e-05	0	0.00013	0	0	0	0	0.00024	0	0.00016	0.000616279	2	C12-Cd2-H12-N6-O2-S4	0	0	equal_bothsteps	equal	0	Success at all eik	This sg doesnt have any
970	XOLZUT_FSR	0.00025	0.00015	1e-05	-0.0001	-2e-05	0.00017	-0.00026	-0.0001	-0.00014	-3e-05	-0.00021	0.00022	0.00023	-4e-05	-2e-05	-4e-05	-4e-05	-0.0001	0.000490249	1	Zn2-H30-C38-N2-O8	0	0	equal_bothsteps	equal	0	This sg doesnt have any	This sg doesnt have any
781	OCEJAK01_FSR	-9e-05	-0.00011	-0.00018	0	-0.00022	0	0	0	0	-0.00025	0	6e-05	-0.00024	0.00015	0.00029	0	-0.00017	0	0.00044058	m	C56-Cd2-H40-N4-O16	0	0	equal_bothsteps	equal	0	Success at all eik	This sg doesnt have any
391	INOZIU_FSR	0	0	0	-0.00013	0	7e-05	-3e-05	-4e-05	0.00018	0	0.00011	0	0	0	0	6e-05	0	3e-05	0.000216795	2	Hg2-H28-C26-I4-N4	0	0	equal_bothsteps	equal	0	Success at all eik	This sg doesnt have any
286	TAXHUX_FSR	0	0	0	-0.00013	0	6e-05	0	1e-05	1e-05	0	-9e-05	0	0	0	0	0	0	-3e-05	0.00014375	2	C20-H56-N8-O16-P4-Zn6	0	0	equal_bothsteps	equal	0	Success at all eik	This sg doesnt have any
984	QEYWIB_FSR	0	0	0	3e-05	0	-7e-05	-2e-05	8e-05	3e-05	0	3e-05	0	0	0	0	0.0001	0	4e-05	0.000107735	2	Zn2-H28-C24-N24-O12	0	0	equal_bothsteps	equal	0	Success at all eik	This sg doesnt have any
241	XUNSAC_FSR	0	0	0	-1e-05	0	1e-05	2e-05	-3e-05	5e-05	0	0	0	0	0	0	5e-05	0	0	6.16e-05	2	Li8-H32-C48-N8-O16	0	0	equal_bothsteps	equal	0	Success at all eik	This sg doesnt have any
831	APORUS_FSR	1e-05	0	1e-05	0	-1e-05	0	0	0	0	1e-05	0	-1e-05	0	1e-05	0	0	2e-05	0	2.49721e-05	m	Cd4-H56-C28-S8-N16-O16	0	0	equal_bothsteps	equal	0	Success at all eik	This sg doesnt have any
1133	HENYUV_FSR	0	0	0	-2e-05	0	0	0	0	0	0	2e-05	0	0	0	0	0	0	0	2e-05	422	Zn4-H8-C28-N4-O16	0	0	equal_bothsteps	equal	0	Success at all eik	Success at all eik
52	HAFCOJ_FSR	0	0	0	0	0	0	0	0	0	0	0	0	0	0	0	0	0	0	0	mmm	Fe2-Ni2-H12-C24-N16-F4	0	0	equal_bothsteps	equal	0	Centro as per csd	Centro as per csd
69	QEQLAC_FSR	0	0	0	0	0	0	0	0	0	0	0	0	0	0	0	0	0	0	0	-1	Fe1-Hg2-H28-C34-S6-N14	0	0	equal_bothsteps	equal	0	Centro as per csd	Centro as per csd
1447	SAQSAF03_FSR	0	0	0	0	0	0	0	0	0	0	0	0	0	0	0	0	0	0	0	m-3	Cu8-H24-C24-S24-N24-Cl8	0	0	equal_bothsteps	equal	0	Centro as per csd	Centro as per csd
1457	SAQSEJ_FSR	0	0	0	0	0	0	0	0	0	0	0	0	0	0	0	0	0	0	0	m-3	Cu8-H24-C24-S24-Br8-N24	0	0	equal_bothsteps	equal	0	Centro as per csd	Centro as per csd
