# Supplementary material for: Computational screening of piezoelectric constants in metal–organic frameworks: design principles and ferroelectric-like bond modulation
Source: J Mater Chem A Mater. 2026 Feb 24;14(23):14311–23. doi: 10.1039/d5ta09332e (PMC12951834; doi:10.1039/d5ta09332e)
Supplement: TA-014-D5TA09332E-s002 [file TA-014-D5TA09332E-s002.xlsx]

## Sheet: benchmarks_zifs_sym
Optimisation	piezo
INCAR	INCAR		ZIF8	VASP	VASP	VASP
ENCUT = 520.000000	ENCUT = 520.000000		ENCUT	520	700	520
SIGMA = 0.010000	SIGMA = 0.010000		KPOINTS	1000	1000	2000
EDIFF = 1.00e-06	EDIFF = 1.00e-06
SYMPREC = 1.00e-03	SYMPREC = 1.00e-02		Results
ALGO = Fast	ALGO = Fast		Clamped ion norm	0.03775	0.03831	0.03862
GGA = PE	GGA = PE		Internal Strain norm	-0.042796	-0.04295	-0.0443933
PREC = Accurate	PREC = Accurate		Total e norm	-0.005046	-0.00464	-0.0057733
ISMEAR = 0	ISMEAR = 0
ISYM = 2	ISYM = 2
LORBIT = 11	LORBIT = 11
NELM = 150	NELM = 150		CdIF-1	VASP	VASP	VASP
NUPDOWN = -1	NUPDOWN = -1		ENCUT	520	700	520
IVDW = 12	IVDW = 12		KPOINTS	1000	1000	2000
NCORE = 32	NCORE = 32
KPAR= 3	KPAR= 3		Results
ADDGRID = .FALSE.	ADDGRID = .FALSE.		Clamped ion norm	0.04205	0.0427	0.04825
LAECHG = .TRUE.	LAECHG = .TRUE.		Internal Strain norm	-0.051153	-0.05197	-0.05211
LASPH = .FALSE.	LASPH = .FALSE.		Total e norm	-0.009103	-0.00927	-0.00926
LCHARG = .FALSE.	LCHARG = .FALSE.
LWAVE = .TRUE.	LWAVE = .TRUE.
LREAL = .FALSE.	LREAL = .FALSE.
NELMIN=3	IBRION= 6
IBRION= 2	ISIF= 2
ISIF= 3	LEPSILON= .TRUE.
NSW=250
Kpts 1000/no atoms	Kpts 1000/no atoms

## Sheet: REDMUL_convergence_nosym
MOF studied	REDMUL_FSR
Path in QMOF database	/home/srinidhi/qmofdatabase/vasp_files_A/vasp_files/REDMUL_FSR
Kpoints=1000/atoms(311)
Natoms=142
INCAR (Step 5 in database)		Optimisation	Original1	Method 1	Method 2	Method 2	Method 3	Original2	Original3	Original4	Original5	Method
ENCUT = 520.000000		ENCUT	Structure from database	520	520	520	700	Structure from database	Structure from database	Structure from database	Structure from database	520
SIGMA = 0.010000		SYMPREC		1e-08	1e-05	1e-05	0.001					0.001
EDIFF = 1.00e-06		EDIFFG		default (ediff*10)	default (ediff*10)	default (ediff*10)	default (ediff*10)					default (ediff*10)
SYMPREC = 1.00e-08		ISYM		2	2	2	2					2
ALGO = Fast		IBRION		2	2	2	2					2
GGA = PE		ISIF		3	3	3	3					3
PREC = Accurate		NSW		250	250	250	250					250
ISMEAR = 0		NELMIN		3	3	3	3					3
ISYM = 0		KPOINTS		311	311	311	113					113
LORBIT = 11		resources		108	72	72	288					72
NELM = 150
NSW = 0		Piezo
NUPDOWN = -1		IBRION	6	6	6	6	6	6	6	8	8	6
IVDW = 12		ISIF	2	2	2	2	2	2	3	2	2	2
NCORE = 24		LEPSILON	TRUE	TRUE	TRUE	TRUE	TRUE	TRUE	TRUE	TRUE	TRUE	TRUE
ADDGRID = .FALSE.		ISYM	0	0	0	0	0	0	0	0	0	0
LAECHG = .TRUE.		KPOINTS	311	311	311	411	113	311	311	311	411	113
LASPH = .FALSE.		resources	864	936	672		1056	1296	1440	2112	1536	672
LCHARG = .TRUE.		ENCUT	520	520	520	520	700	700	700	700	700	520
LWAVE = .TRUE.		Path	/home/srinidhi/BEC_work/QMOF_database/REDMUL_FSR_encut520_520/piezo_original	/home/srinidhi/BEC_work/QMOF_database/REDMUL_FSR_encut520_520/opt_tight/piezo	/home/srinidhi/BEC_work/QMOF_database/REDMUL_FSR_encut520_520/opt_symprec/piezo_symprec	/home/srinidhi/BEC_work/QMOF_database/REDMUL_FSR_encut520_520/opt_symprec/piezo_symprec_kptinc		/home/srinidhi/BEC_work/QMOF_database/REDMUL_FSR_encut520_700/REDMUL_FSR_qmof_finite_isif2	/home/srinidhi/BEC_work/QMOF_database/REDMUL_FSR_encut520_700/REDMUL_FSR_qmof_finite_isif3		/home/srinidhi/BEC_work/QMOF_database/REDMUL_FSR_encut520_700/REDMUL_FSR_qmof_dfpt_kptinc411
LREAL = .FALSE.		Results
ediffg is -0.05 or -0.03		clamped norm	0.0619229	0.0620986	0.0622933	0.0623009	0.0636388	0.0619453	0.0619458	0.0619474	0.0619612	0.0647908
ibrion is 2		dynamic norm	0.0560587	0.0558445	0.0558701	0.0559373	0.0564889	0.0556864	0.0558756	0.05397	0.0544859	0.058881
isif is 2 and 3 in previous steps		e norm	0.0395114	0.0420851	0.0423614	0.0423897	0.0403554	0.0400635	0.0398618	0.0311188	0.030689	0.0569492
	Symmetry	eik	Original1	Method 1	Method 2	Method 2	Method 3	Original2	Original3	Original4	Original5	Method
	e11	e11	0.00408	0.00303	0.003	0.00303	0.00347	0.00416	0.00383	0.00232	0.00277	0.00783
	e12	e12	0.01559	0.01592	0.01566	0.01561	0.01197	0.01609	0.01573	0.01497	0.01481	0.02535
	e13	e13	0.01159	0.01229	0.01197	0.01191	0.01668	0.01164	0.01156	0.01017	0.01044	0.03916
	0	e14	0.01042	0.01116	0.01107	0.01103	0.01039	0.01137	0.01096	0.01273	0.01248	0.03071
	e15	e15	-0.00187	-0.00325	-0.00314	-0.00326	-0.00554	-0.00199	-0.0024	-0.00334	-0.00203	0.00096
	0	e16	0.0026	0.00067	0.00073	0.00072	-0.00518	0.00259	0.00202	0.00162	0	0.00036
	0	e21	0.00758	0.00631	0.00637	0.00631	-0.00029	0.00743	0.00737	0.00204	0.00258	0.00333
	0	e22	-0.00536	-0.00789	-0.00768	-0.00764	-0.00485	-0.00538	-0.00553	-0.00658	-0.00576	-0.00438
	0	e23	-0.01444	-0.01564	-0.01607	-0.01598	-0.00589	-0.01483	-0.01449	-0.01213	-0.01187	-0.0041
	e24	e24	-0.00087	-0.00296	-0.0026	-0.00268	-0.00039	-0.00081	-0.00088	0.00024	0.00129	0.00104
	0	e25	0.02221	0.0216	0.02242	0.02238	0.02502	0.02319	0.0224	0.01484	0.01489	0.02382
	e26	e26	0.01363	0.01306	0.01342	0.01349	0.00167	0.01408	0.0137	0.00904	0.00969	0.00152
	e31	e31	-0.00201	-0.00255	-0.00238	-0.00233	-0.00258	-0.00176	-0.00214	-0.00224	-0.00256	0.00255
	e32	e32	-0.00825	-0.01034	-0.01025	-0.01005	-0.00919	-0.008	-0.00834	-0.00597	-0.00656	-0.00731
	e33	e33	-0.00952	-0.0104	-0.01029	-0.01039	-0.00786	-0.00887	-0.00956	-0.00864	-0.00798	-0.00603
	0	e34	-0.00357	-0.0051	-0.00509	-0.00523	0.00125	-0.0038	-0.00368	-0.00215	-0.00267	0.00248
	e35	e35	0.00212	0.00266	0.00264	0.00279	0.01491	0.00234	0.00219	0.00047	0.00117	0.01417
	0	e36	0.02522	0.0244	0.02456	0.02458	0.02457	0.02501	0.02502	0.01724	0.0155	0.0227

## Sheet: REDMUL_convergence_sym
MOF studied	REDMUL_FSR
Optimisation	Method 2(isym2)	Method 1(isym2)	Method 3(isym2)
ENCUT	520	520	700
SYMPREC	0.001	0.001	0.001
EDIFFG	default (ediff*10)	default (ediff*10)	default (ediff*10)
ISYM	2	2	2
IBRION	2	2	2
ISIF	3	3	3
NSW	250	250	250
NELMIN	3	3	3
KPOINTS	2000	1000	1000
resources
Piezo
IBRION	6	6	6
ISIF	2	2	2
LEPSILON	TRUE	TRUE	TRUE
ISYM	2	2	2
KPOINTS	2000	1000	1000
ENCUT	520	520	700
Results
Clamped ion norm	0.0679695	0.0677777	0.0682155
Internal Strain norm	0.0567008	0.0560234	0.0558147
Total e norm	0.0462575	0.047142	0.0465173
Symmetry (Cc)	eik	Method 2(isym2)	Method 1(isym2)	Method 3(isym2)
e11	e11	0.0335	0.03463	0.0345
e12	e12	0.00812	0.00817	0.00868
e13	e13	-0.01248	-0.01237	-0.01175
0	e14	0	0	0
e15	e15	-0.02401	-0.02389	-0.02334
0	e16	0	0	0
0	e21	3e-05	6e-05	0
0	e22	0	2e-05	0
0	e23	0	6e-05	2e-05
e24	e24	0.01758	0.01776	0.01773
0	e25	1e-05	3e-05	3e-05
e26	e26	-0.00432	-0.00452	-0.00448
e31	e31	-0.02333	-0.0236	-0.02199
e32	e32	-0.00281	-0.00245	-0.0017
e33	e33	-0.00634	-0.00615	-0.00447
0	e34	0	0	0
e35	e35	-0.00625	-0.00649	-0.00552
0	e36	0	0	0

## Sheet: VESBEC01_convergence_sym
MOF studied	VESBEC01_FSR
Optimisation	Method 1(isym2)	Method 2(isym2)	Method 3(isym2)
ENCUT	520	520	700
SYMPREC	0.001	0.001	0.001
EDIFFG	default (ediff*10)	default (ediff*10)	default (ediff*10)
ISYM	2	2	2
IBRION	2	2	2
ISIF	3	3	3
NSW	250	250	250
NELMIN	3	3	3
KPOINTS	1000	1000	1000
resources
Piezo
IBRION	6	6	6
ISIF	2	2	2
LEPSILON	TRUE	TRUE	TRUE
ISYM	2	2	2
KPOINTS	1000	2000	1000
Calc cost(cpuhrs)	64	128	128
ENCUT	520	520	700
Results
Clamped ion norm	0.0971767	0.0969085	0.0971062
Internal Strain norm	0.667574	0.675454	0.65736
Total e norm	0.623935	0.632068	0.615254
Symmetry (P41)	eik	Method 1(isym2)	Method 2(isym2)	Method 3(isym2)
0	e11	0.00036	0	0.00039
0	e12	-0.00013	0	-0.00013
0	e13	4e-05	0	5e-05
e14	e14	-0.04456	-0.05697	-0.04906
e15	e15	-0.20001	-0.2021	-0.19796
0	e16	-0.00011	0	-0.00014
0	e21	7e-05	0	7e-05
0	e22	-0.00013	0	-0.00013
0	e23	8e-05	0	8e-05
e15	e24	-0.2	-0.2021	-0.19796
-e14	e25	0.04455	0.05697	0.04906
0	e26	-0.0001	0	-0.0001
e31	e31	-0.13201	-0.1429	-0.13589
e31	e32	-0.13201	-0.1429	-0.13589
e33	e33	-0.59535	-0.59889	-0.58447
0	e34	0	0	0
0	e35	0	0	0
0	e36	0	0	0

## Sheet: forpaper_plots
Kpts1000	ENCUT	e_norm_encut		Encut520	KPOINTS	e_norm_kpts
REDMUL	520	0.047142		REDMUL	1000	0.047142
REDMUL	700	0.0465173		REDMUL	2000	0.0462575
VESBEC01	520	0.623935		VESBEC01	1000	0.623935
VESBEC01	700	0.615254		VESBEC01	2000	0.632068
ZIF-8	520	-0.005046		ZIF-8	1000	-0.005046
ZIF-8	700	-0.00464		ZIF-8	2000	-0.0057733
CdIF-1	520	-0.009103		CdIF-1	1000	-0.009103
CdIF-1	700	-0.00927		CdIF-1	2000	-0.00926
