# Supplementary material for: Computational screening of piezoelectric constants in metal–organic frameworks: design principles and ferroelectric-like bond modulation
Source: J Mater Chem A Mater. 2026 Feb 24;14(23):14311–23. doi: 10.1039/d5ta09332e (PMC12951834; doi:10.1039/d5ta09332e)
Supplement: TA-014-D5TA09332E-s003 [file TA-014-D5TA09332E-s003.xlsx]

## Sheet: Sheet1
	info_MOFCode	e11	e12	e13	e14	e15	e16	e21	e22	e23	e24	e25	e26	e31	e32	e33	e34	e35	e36	info_DynamicNorm	info_PointGroup	info_Atoms	info_optnetmagmom	info_piezonetmagmom	info_magmom_matchopt&piezo	info_magmom_matchwithqmof	info_qmofmagmom	Status_zeroesconvergenceintensor	Status_dependentconvintensor
0	EHOHOY_FSR	-1.72457	-0.17508	0.23186	0	-0.16615	0	0.00019	-8e-05	-0.0001	0.37537	-1e-05	-0.00733	-0.17425	0.35104	0.218	0	-0.52429	0	1.77185	m	Sb4-P4-H4-C2-O14	0	0	equal_bothsteps	equal	0	Success at all eik	This sg doesnt have any
1	RAHKAO_FSR	4e-05	-4e-05	0	-0.01294	-2e-05	0.03106	0.38827	0.03036	0.10722	0	0.00953	0	0.00011	6e-05	6e-05	-0.01275	9e-05	-0.01919	0.404057	2	Sb2-H22-C18-N2-O4-F6	0	0	equal_bothsteps	equal	0	Success at all eik	This sg doesnt have any
2	ROZXAH_FSR	0.1553	0.03043	0.01986	0	-0.09024	0	0	0	0	-0.18225	0	0.03352	-0.1134	-0.32681	0.06388	0	-0.00476	0	0.361463	m	Al2-Cd2-B10-H36-C10-N8-O20	0	0	equal_bothsteps	equal	0	Success at all eik	This sg doesnt have any
3	QEFZOQ_FSR	0.01575	0.01724	-0.02413	0	0.01263	0	0	-2e-05	-2e-05	-0.00167	-1e-05	0.02337	-0.0225	0.00933	-0.02421	0	-0.05024	0	0.0610561	m	Al2-H22-C16-S2	0	0	equal_bothsteps	equal	0	Success at all eik	This sg doesnt have any
4	MISHEC_FSR	0.1854	0.01828	0.03889	0	0.03797	0	1e-05	1e-05	0	0.01043	0	-0.01545	0.04199	0.045	-0.04904	0	0.04445	0	0.1997	m	Ba2-C12-H20-Ni2-O22	0	0	equal_bothsteps	notequal	4	Success at all eik	This sg doesnt have any
5	TEKRIM_FSR	0.00014	-3e-05	4e-05	-0.01124	3e-05	-0.03349	-0.03975	-0.02298	0.048	0	-0.02163	0	-0.00014	3e-05	-0.00021	-0.00866	3e-05	-0.01838	0.0698571	2	C34-Ca1-H28-N2-O8-P2	0	0	equal_bothsteps	equal	0	Success at all eik	This sg doesnt have any
6	UYUSAJ_FSR	0	-1e-05	1e-05	0	0.2631	0	-2e-05	0.00083	0.00074	0.06069	0	0	0.0175	-0.00369	0.62838	0	0	0	0.628635	mm2	Ba2-C12-H16-N16-O10	0	0	equal_bothsteps	equal	0	Success at all eik	This sg doesnt have any
7	ELAJUX_FSR	0.06691	-0.00739	-0.04394	0	-0.03525	0	3e-05	0	0	-0.07493	1e-05	0.03904	-0.04828	0.00241	0.22151	0	-0.05484	0	0.238521	m	Bi2-H38-C24-S2-N4-O8	0	0	equal_bothsteps	equal	0	Success at all eik	This sg doesnt have any
8	IWETAF01_FSR	2e-05	-6e-05	-1e-05	-0.06582	5e-05	0.10973	0.13146	-0.1042	0.23462	0	-0.09137	0	3e-05	-3e-05	-2e-05	-0.02979	1e-05	0.01824	0.302547	2	Ca2-H20-C8-O16	0	0	equal_bothsteps	equal	0	Success at all eik	This sg doesnt have any
9	IXUWUV_FSR	0.14906	0.00765	0.08259	0	0.02574	0	0	-1e-05	-1e-05	-0.06293	-1e-05	-0.02289	0.08688	-0.09951	-0.38307	0	0.02603	0	0.409185	m	Ba2-C16-H18-N6-O10	0	0	equal_bothsteps	equal	0	Success at all eik	This sg doesnt have any
10	OPOBOL_FSR	7e-05	0.00015	7e-05	0	0.04962	0	-2e-05	2e-05	1e-05	-0.73179	0	0	-0.01418	0.01889	0.07745	0	0	0	0.73179	mm2	Ba2-C24-H20-N4-O16	0	0	equal_bothsteps	equal	0	Success at all eik	This sg doesnt have any
11	NOHHEY_FSR	-3e-05	0	-9e-05	-0.06806	0	0	0	0	-1e-05	0	-0.09176	0	1e-05	1e-05	1e-05	0	0	-0.04105	0.09176	2	Ge6-H28-C12-N4-O12	0	0	equal_bothsteps	equal	0	Success at all eik	This sg doesnt have any
12	PUHWAS_FSR	1e-05	-6e-05	-5e-05	-0.03087	2e-05	-0.01351	0.12107	-0.06009	-0.05242	0	-0.04471	0	4e-05	1e-05	-8e-05	-0.10581	-2e-05	-0.00516	0.151709	2	Br4-C20-Ca2-H36-N4-O8	0	0	equal_bothsteps	equal	0	Success at all eik	This sg doesnt have any
13	CEHQOX_FSR	0.00029	0.00019	8e-05	-0.06815	0	-0.02021	-0.09492	-0.13659	0.01233	0	-0.05379	0	1e-05	3e-05	4e-05	-0.02507	1e-05	-0.04213	0.175249	2	Bi4-H6-C14-N2-O12	0	0	equal_bothsteps	equal	0	Success at all eik	This sg doesnt have any
14	UYACUT_FSR	2e-05	1e-05	3e-05	0	0.02836	0	2e-05	-2e-05	-1e-05	0.14813	0	0	0.21074	0.08023	0.1818	0	0	0	0.289654	mm2	Bi2-C20-H20-N22	0	0	equal_bothsteps	equal	0	Success at all eik	This sg doesnt have any
15	KOPBIC_FSR	0.00486	-0.02325	-0.01616	0	-0.00495	0	1e-05	2e-05	5e-05	-0.04433	1e-05	0.0277	0.01544	0.05953	0.06596	0	-0.01129	0	0.0944791	m	Ca2-H12-C12-N4-Cl4-O2	0	0	equal_bothsteps	equal	0	Success at all eik	This sg doesnt have any
16	CIHXOJ_FSR	-0.04879	-0.15383	-0.00689	0	0.20249	0	0	3e-05	-7e-05	-0.13559	0	-0.13101	0.15307	-0.13961	0.04588	0	0.05812	0	0.291325	m	Bi2-H16-C20-N2-O20	0	0	equal_bothsteps	equal	0	Success at all eik	This sg doesnt have any
17	QEHJIX_FSR	-0.00021	1e-05	-0.00014	0.0853	-0.00017	0.06381	0.16689	0.00905	0.02617	0	0.1431	0	-0.00019	3e-05	-0.00015	-0.04286	-0.00016	0.05985	0.221578	2	Ba2-H20-C20-O14	0	0	equal_bothsteps	equal	0	Success at all eik	This sg doesnt have any
18	HAYPEC_FSR	0.13043	0.20019	0.00604	0	-0.25712	0	-2e-05	-2e-05	0	-0.18432	0.00013	-0.0993	-0.13162	0.11271	0.00187	0	0.07285	0	0.353851	m	Bi2-C20-H26-N4-O16	0	0	equal_bothsteps	equal	0	Success at all eik	This sg doesnt have any
19	PGALSB_FSR	1e-05	1e-05	1e-05	0	0.29293	0	6e-05	-0.00011	-5e-05	0.20713	0	0	0.11153	0.14327	0.35476	0	0	0	0.398522	mm2	C12-H6-O6-Sb2	0	0	equal_bothsteps	equal	0	Success at all eik	This sg doesnt have any
20	WEMJUU_FSR	-1e-05	1e-05	0	0	-0.09377	0	2e-05	-5e-05	-7e-05	-0.01561	0	0	-0.00274	0.00826	0.02925	0	0	0	0.09377	mm2	Cs2-H26-C14-N4-O14	0	0	equal_bothsteps	equal	0	Success at all eik	This sg doesnt have any
21	ODEQOD_FSR	-0.00068	-0.00153	0.00043	0	-0.00312	0	-9e-05	4e-05	0	-0.00361	0	0	0.01752	0.01752	0.03195	0	0	0	0.0404362	4mm	C20-Cd2-Cl8-H12-I4-N4	0	0	equal_bothsteps	equal	0	Success at all eik	Success at all eik
22	DECBAQ_FSR	-0.00361	-0.01803	-0.00327	0.01114	-0.04069	0.04047	-0.04595	0.02332	-0.02286	-0.10607	-0.01655	-0.18561	0.02125	0.01943	-0.00471	0.00783	-0.01541	-0.00102	0.224953	1	V8-Co4-H16-C8-N4-O28	2	2	equal_bothsteps	notequal	8	This sg doesnt have any	This sg doesnt have any
23	MIRLEF_FSR	-4e-05	-4e-05	0.0001	0	0.14243	0	1e-05	2e-05	0	-0.09576	0	0	0.06168	-0.134	-0.03474	0	0	0	0.15155	mm2	C16-Cs4-H12-O26-U2	0	0	equal_bothsteps	equal	0	Success at all eik	This sg doesnt have any
24	OCORIK01_FSR	1e-05	1e-05	0	0	0.06053	0	0	0	0	0.15643	0	0	-0.12389	0.07445	-0.11492	0	0	0	0.184657	mm2	Cs4-H28-C24-O28	0	0	equal_bothsteps	equal	0	Success at all eik	This sg doesnt have any
25	UTEYOI_FSR	9e-05	0.00103	0.00147	-0.02169	0.00035	-0.03293	-0.10702	-0.00441	-0.01172	0.00072	-0.025	-0.00278	0.00108	-0.00336	-0.00103	0.00926	-0.00081	-0.00429	0.110651	2	Br2-C34-Co2-H30-N8-O8	6	6	equal_bothsteps	equal	6	Success at all eik	This sg doesnt have any
26	ESADUZ01_FSR	0.00016	0.0002	-5e-05	0	-0.3373	0	7e-05	-3e-05	5e-05	0.05962	0	0	-0.14762	0.05875	0.19564	0	0	0	0.3373	mm2	C28-Cd2-H24-O14	0	0	equal_bothsteps	equal	0	Success at all eik	This sg doesnt have any
27	VUTLAY_FSR	-0.01891	-0.0154	-0.0153	-0.00069	0.00057	0.00134	0.03928	0.0313	0.037	0.00078	0.00065	-0.00267	0.02891	0.02359	0.02685	0.00113	-5e-05	-0.00158	0.0827235	1	V4-Co2-H18-C10-N4-O14	0	2	notequal_bothsteps	notequal	4	This sg doesnt have any	This sg doesnt have any
28	PEVYUM_FSR	-0.04863	-0.01914	-0.10203	0.01497	-0.02178	-0.03895	-0.01582	0.01192	-1.24189	-0.06035	-0.17695	0.22856	0.0203	0.01232	0.22143	-0.01043	0.03655	-0.00404	1.29918	2	C24-Co2-F2-H20-N4-O6	2	0	notequal_bothsteps	notequal	0	Failed at e35	This sg doesnt have any
29	UFIKAX01_FSR	-0.02918	0.04746	-0.00108	0	-0.02553	0	8e-05	-0.0001	2e-05	0.061	-0.00015	-0.03363	0.02006	0.20408	-0.10554	0	-0.0714	0	0.245839	m	C12-Cs4-H8-N12-S12	0	0	equal_bothsteps	equal	0	Success at all eik	This sg doesnt have any
30	XEYSAY_FSR	0	0	0	0	0.00411	0	6e-05	-7e-05	-4e-05	0.01983	0	0	0.12486	0.02606	0.31798	0	0	0	0.342608	mm2	Co2-P4-H24-C26-O14	6	6	equal_bothsteps	equal	6	Success at all eik	This sg doesnt have any
31	RISBUT_FSR	-0.01284	-0.01711	0.01077	0	0.0005	0	-0.00017	0.00027	0.00012	-0.0093	-0.0001	0.00371	-0.02328	-0.01298	0.39608	0	-0.01787	0	0.39756	m	C24-Cd2-H28-O18-P4-V2	0	0	equal_bothsteps	equal	0	Success at all eik	This sg doesnt have any
32	MAFBAX_FSR	0.0001	7e-05	-0.00015	0.09838	-0.00025	0.09294	0.21176	0.04667	0.08008	0	0.17779	0	-0.00012	-3e-05	-0.0001	-0.22503	2e-05	0.38275	0.445129	2	Cr4-Ni2-H32-C24-N8-O14	0	0	equal_bothsteps	equal	0	Success at all eik	This sg doesnt have any
33	ALIMEP_FSR	-8e-05	3e-05	-2e-05	0	0.00342	0	-2e-05	-0.0001	-2e-05	0.09153	0	0	0.02135	0.17264	0.06649	0	0	0	0.186229	mm2	Cd4-H36-C28-N28-O4	0	0	equal_bothsteps	equal	0	Success at all eik	This sg doesnt have any
34	DEZMOL_FSR	-3e-05	2e-05	1e-05	-0.00021	7e-05	-0.0004	-0.00198	-0.00044	0.00169	0	-0.00223	0	-0.00021	-6e-05	-0.0002	0.00166	-0.00012	0.00121	0.00345869	2	C12-Cd2-H12-N6-O2-S4	0	0	equal_bothsteps	equal	0	Success at all eik	This sg doesnt have any
35	ZOMNUM_FSR	6e-05	3e-05	0	-0.03699	-2e-05	-0.09943	-0.0913	-0.09199	0.01048	0	-0.03808	0	0	-1e-05	2e-05	-0.00669	0	-0.05906	0.135491	2	C14-Cr1-H18-N4-O4-Zn1	0	0	equal_bothsteps	equal	0	Success at all eik	This sg doesnt have any
36	XAKRUY_FSR	0.0111	0.01896	-0.02532	0	-0.01612	0	0.00012	-0.00012	-6e-05	0.22079	2e-05	-0.06085	-0.11005	0.23421	0.2615	0	0.08536	0	0.377883	m	C6-Cd2-H8-N8-O6-S2	0	0	equal_bothsteps	equal	0	Success at all eik	This sg doesnt have any
37	OPEMIG_FSR	-1e-05	0.0001	0	0.04386	7e-05	-0.00203	-0.10336	-0.14402	-0.09223	0	-0.13916	0	-6e-05	0	-4e-05	0.1458	-2e-05	-0.08256	0.24351	2	Cd2-P8-H40-C12-N4-O24	0	0	equal_bothsteps	equal	0	Success at all eik	This sg doesnt have any
38	RIKREL_FSR	-0.00013	1e-05	1e-05	-0.00317	-3e-05	0.0332	0.02642	-0.01115	-0.0188	0	0.00127	0	-7e-05	5e-05	-8e-05	0.03008	-6e-05	-0.00353	0.0353374	2	C12-Ce1-H10-O6-P2	0	0	equal_bothsteps	equal	0	Success at all eik	This sg doesnt have any
39	HEVXAI_FSR	2e-05	0	-1e-05	-0.01487	0	0.0251	-0.00133	0.21651	-0.00114	0	-0.02273	0	-1e-05	0	1e-05	-0.04099	0	-0.02725	0.217707	2	Cd2-P4-H38-C14-N2-Cl4-O16	0	0	equal_bothsteps	equal	0	Success at all eik	This sg doesnt have any
40	NAPTEE_FSR	-0.00263	-0.00416	-0.00174	0	0.0019	0	-0.00011	-0.00017	-6e-05	-0.00028	5e-05	-0.00037	-0.00716	-0.00918	-0.00562	0	0.00142	0	0.0140739	m	C16-Cd2-H20-I4-N8	0	0	equal_bothsteps	equal	0	Success at all eik	This sg doesnt have any
41	KUZHAQ_FSR	-0.05944	0.04601	-0.11109	-0.00632	-0.07611	-0.06641	-0.1079	0.30412	-0.01336	0.02658	0.0024	-0.03528	-0.05264	0.01841	-0.12361	0.06256	-0.08594	0.05324	0.341723	1	Cs2-H20-C10-Cl2-O10	0	0	equal_bothsteps	equal	0	This sg doesnt have any	This sg doesnt have any
42	FAMHEI_FSR	0	0	0	-0.114	0	0.01119	0.43878	-0.01003	-0.00795	0	-0.04636	0	-1e-05	0	0	0.07864	0	-0.0427	0.441408	2	Co2-H18-C10-S2-N2-O12	0	0	equal_bothsteps	equal	0	Success at all eik	This sg doesnt have any
43	KIZQAN_FSR	8e-05	-2e-05	4e-05	0.01664	0	-0.0356	-0.12005	-0.03728	-0.06643	0	-0.02857	0	5e-05	3e-05	4e-05	-0.0206	-1e-05	-0.0355	0.145021	2	Cd2-H10-C12-N6-Cl4	0	0	equal_bothsteps	equal	0	Success at all eik	This sg doesnt have any
44	GOFNEV_FSR	0.00138	0.00064	-0.00032	0	0.10034	0	0.00012	2e-05	2e-05	-0.08944	0	0	-0.09506	-0.09199	-0.01056	0	0	0	0.13272	mm2	C16-Cd2-H12-N24	0	0	equal_bothsteps	equal	0	Success at all eik	This sg doesnt have any
45	XIDCET_FSR	-0.00058	-2e-05	-0.00022	0	0.0289	0	-2e-05	-2e-05	-2e-05	-0.05494	0	0	0.11812	-0.10205	-0.03486	0	0	0	0.159943	mm2	C28-Cs2-H16-N4-P2-S4	0	0	equal_bothsteps	equal	0	Success at all eik	This sg doesnt have any
46	LEHHIR_FSR	1e-05	0	0	0.00994	0	0.04633	-0.0864	-0.02137	0.00846	0	0.01004	0	0	0	-1e-05	-0.03116	0	0.03066	0.0899667	2	Cd2-H30-C38-Br2-N4-O10	0	0	equal_bothsteps	equal	0	Success at all eik	This sg doesnt have any
47	UHOYIZ_FSR	1e-05	-1e-05	1e-05	0	0.13948	0	0.00014	4e-05	4e-05	0.18486	0	0	0.11983	0.18053	-0.57913	0	0	0	0.618338	mm2	C6-Cd4-H20-N4-Se4	0	0	equal_bothsteps	equal	0	Success at all eik	This sg doesnt have any
48	QEVMOW01_FSR	0.00099	0.00068	0.00167	0.00329	0.00019	0.00836	-0.37744	-0.22556	-0.67639	0	-0.01876	0	0.00194	0.00129	0.00346	-0.02492	0.00016	-0.1464	0.806979	2	C8-H4-K1-Li1-O12-Sb2	0	0	equal_bothsteps	equal	0	Success at all eik	This sg doesnt have any
49	VOKMUE_FSR	0.00977	-0.00369	0.00031	-0.00671	0.00169	0.02257	0.31958	-0.01592	0.01309	-0.00015	-0.03643	-0.0019	0.00033	0.00061	-0.00128	0.03314	0.00069	-0.01051	0.322458	2	Fe2-P2-H18-C6-O8	8	8	equal_bothsteps	equal	8	Success at all eik	This sg doesnt have any
50	DONNEA_FSR	0.07629	0.08378	-0.18779	0	-0.0254	0	0	1e-05	2e-05	0.02773	1e-05	-0.00406	-0.05487	-0.00631	-0.00078	0	-0.03979	0	0.221437	m	C16-Ga2-H10-O10	0	0	equal_bothsteps	equal	0	Success at all eik	This sg doesnt have any
51	QAPCUH_FSR	-0.01359	0.01553	-0.02527	0	0.01586	0	2e-05	-2e-05	-1e-05	-0.00242	1e-05	0.02335	-0.01483	0.00527	-0.02414	0	-0.08497	0	0.0898935	m	Ga2-H22-C16-S2	0	0	equal_bothsteps	equal	0	Success at all eik	This sg doesnt have any
52	HAFCOJ_FSR	-5e-05	-4e-05	5e-05	0	0	0	0.00023	0.00027	-1e-05	0	0	0	-2e-05	0	2e-05	0	0	0	0.000360983	mmm	Fe2-Ni2-H12-C24-N16-F4	0	0	equal_bothsteps	equal	0	Centro as per csd	Centro as per csd
53	CESZIM_FSR	-0.10155	0.0292	-0.0064	0	0.03019	0	9e-05	-6e-05	-5e-05	0.09231	-1e-05	0.02603	0.01389	0.01392	0.19806	0	-0.04962	0	0.206261	m	Br2-C12-H6-Hg2-N8-S4	0	0	equal_bothsteps	equal	0	Success at all eik	This sg doesnt have any
54	VEGYAI_FSR	-8e-05	-4e-05	0.00015	-0.09308	6e-05	0.1032	0.0622	-0.15814	-0.09775	0	0.05246	0	5e-05	-5e-05	-6e-05	-0.0369	-7e-05	-0.1013	0.202939	2	In4-H20-C16-O28	0	0	equal_bothsteps	equal	0	Success at all eik	This sg doesnt have any
55	HAFDEA01_FSR	1e-05	0	2e-05	0	-0.11492	0	-9e-05	-0.00012	-6e-05	0.06546	0	0	-0.05507	-0.08298	-0.08345	0	0	0	0.129932	mm2	Fe2-H12-Pt2-C24-N16-F4	0	0	equal_bothsteps	equal	0	Success at all eik	This sg doesnt have any
56	MUHNOT01_FSR	-0.12565	-0.07398	-0.04438	0	0.02241	0	6e-05	2e-05	0	0.01285	-4e-05	-0.02121	0.05244	0.04123	0.04293	0	-0.00883	0	0.172205	2/m	C14-F2-Fe1-H8-N6-Pd1	0	0	equal_bothsteps	equal	0	Centro as per csd	Centro as per csd
57	EWAWEG01_FSR	0	-1e-05	-6e-05	0.00119	0.00012	-0.10878	0.00348	0.14174	0.40218	0	0.00089	0	6e-05	3e-05	3e-05	0.20532	0	0.00214	0.426441	2	Hg2-H4-C2-N10-Cl2	0	0	equal_bothsteps	equal	0	Success at all eik	This sg doesnt have any
58	CELYIE_FSR	-0.09218	0.04177	-0.05926	0	-0.0014	0	0	0	0	0.00259	0	0.00491	0.00873	0.00163	0.01617	0	-0.01245	0	0.118171	2/m	Fe1-H8-Pd1-C12-N8	0	0	equal_bothsteps	equal	0	Centro as per csd	Centro as per csd
59	HAFCUP01_FSR	1e-05	1e-05	2e-05	0	-0.06043	0	4e-05	-1e-05	6e-05	0.11046	0	0	-0.00687	-0.03582	-0.03737	0	0	0	0.11046	mm2	Fe2-H12-Pd2-C24-N16-F4	0	0	equal_bothsteps	equal	0	Success at all eik	This sg doesnt have any
60	FAFDEX_FSR	0.07374	-0.0236	0.17192	0.04958	0.10828	-0.06391	0.06258	-0.03568	-0.04116	0.06212	-0.01739	-0.05305	-0.03334	0.00714	0.07551	-0.00303	0.10684	0.03381	0.250467	1	K1-Mn1-H16-C12-I3-O15	5	5	equal_bothsteps	equal	5	This sg doesnt have any	This sg doesnt have any
61	AMIJAJ_FSR	-0.0083	-0.01922	-0.02488	0	-0.00633	0	-8e-05	-0.0001	-0.00017	0.01376	0	0.01273	0.00666	0.01133	-0.02624	0	0.01789	0	0.0375398	mmm	Fe4-Ni4-H20-C32-I4-N24-O4	4	4	equal_bothsteps	equal	4	Centro as per csd	Centro as per csd
62	LEKMIA_FSR	0.05483	-0.05488	0	0.03105	-0.02393	0.02729	0.0275	-0.02745	-5e-05	-0.02421	-0.03104	-0.05498	-0.00549	-0.00549	0.0565	0	0	0	0.0951849	3	C21-H12-In1-O7-P1	0	0	equal_bothsteps	equal	0	Success at all eik	Success at all eik
63	FAPWAX_FSR	0.04082	-0.02826	-0.01431	0	0.07233	0	5e-05	-1e-05	3e-05	0.04881	-3e-05	-0.03272	-0.03175	0.10661	-0.02916	0	0.05366	0	0.126899	m	B2-C8-H2-K2-N6-O4	0	0	equal_bothsteps	equal	0	Success at all eik	This sg doesnt have any
64	PELTOQ_FSR	-2e-05	-2e-05	2e-05	0	-0.15894	0	0	-3e-05	1e-05	0.08328	0	0	-0.2043	0.02054	-0.18189	0	0	0	0.274307	mm2	C32-H28-In4-O24	0	0	equal_bothsteps	equal	0	Success at all eik	This sg doesnt have any
65	WEZXAB01_FSR	-3e-05	-6e-05	-6e-05	-0.17699	-0.05651	0	-4e-05	-4e-05	-4e-05	-0.05647	0.17696	0	-0.04509	-0.04509	-0.12364	0	0	0	0.185797	6	In6-H18-C18-O36	0	0	equal_bothsteps	equal	0	Success at all eik	Success at all eik
66	TIRFUW_FSR	-0.01941	-0.04668	-0.00076	0	-0.18701	0	4e-05	0	1e-05	-0.00177	2e-05	0.01002	-0.32106	-0.07485	0.23652	0	-0.00609	0	0.406882	m	In2-H18-C24-O12	0	0	equal_bothsteps	equal	0	Success at all eik	This sg doesnt have any
67	IYUCIP_FSR	-1e-05	1e-05	2e-05	-0.003	0	0.20186	0.09369	-0.08693	0.04295	0	-0.06094	0	4e-05	-1e-05	-1e-05	0.04819	1e-05	-0.03166	0.204609	2	C11-Cl4-H16-K2-N2-O8-Zn2	0	0	equal_bothsteps	equal	0	Success at all eik	This sg doesnt have any
68	GERKOF_FSR	-0.07869	0.07915	0.00011	0.0161	-0.00574	0.00323	0.00354	-0.00306	0.00036	-0.00565	-0.01615	0.07912	0.00026	0.00026	-0.00681	0	0	0	0.113007	3	Hg3-Te3-H45-C33-S6-N3	0	0	equal_bothsteps	equal	0	Success at all eik	Success at all eik
69	QEQLAC_FSR	-1e-05	0	0	0	0	0	-1e-05	0	0	0	0	0	0	0	0	0	0	0	1.41e-05	-1	Fe1-Hg2-H28-C34-S6-N14	0	0	equal_bothsteps	equal	0	Centro as per csd	Centro as per csd
70	KDGLUC01_FSR	0	-0.00022	7e-05	0.02989	-5e-05	0.01881	-0.01931	0.06904	-0.01895	0	0.03283	0	0.00012	-9e-05	-1e-05	-0.15243	3e-05	-0.05889	0.167052	2	K2-H18-C12-O16	0	0	equal_bothsteps	equal	0	Success at all eik	This sg doesnt have any
71	FEJKAI_FSR	0.05874	0.00729	0.03847	-0.00348	0.01863	0.00282	0.10746	0.00946	0.05194	0.0004	0.03587	0.0199	0.04816	-0.04482	-0.00935	-0.00107	0.01561	0.00576	0.151325	2/m	Mn2-Hg2-H24-C24-S8-N16	4	2	notequal_bothsteps	equal	4	Centro as per csd	Centro as per csd
72	KOGBUF_FSR	1e-05	-1e-05	-8e-05	0	-0.07027	0	0.00049	0.00016	0.0001	-0.09155	0	0	-0.192	-0.08336	0.10798	0	0	0	0.235527	mm2	K4-H12-C12-N16-O20	0	0	equal_bothsteps	equal	0	Success at all eik	This sg doesnt have any
73	UKUFAH_FSR	1e-05	1e-05	0	0.02523	0	-0.11986	-0.172	-0.02668	0.03681	0	0.05093	0	0	0	0	-0.01771	0	0.02207	0.185053	2	K2-H34-C24-O2	0	0	equal_bothsteps	equal	0	Success at all eik	This sg doesnt have any
74	QUMVOK_FSR	3e-05	1e-05	2e-05	0	-0.02784	0	-1e-05	0	0	-0.04601	0	0	-0.20363	-0.03455	-0.08717	0	0	0	0.224182	mm2	C16-H16-Hg2-N8-S4	0	0	equal_bothsteps	equal	0	Success at all eik	This sg doesnt have any
75	WEHSUZ_FSR	-0.08276	-0.03188	0.06603	-6e-05	-0.02723	-0.00013	-3e-05	-0.0013	-0.00109	-0.0046	-0.00038	-0.11439	-0.06829	0.01753	0.13365	-0.00066	-5e-05	0.00039	0.180747	m	La4-H20-C36-N12-O28	0	0	equal_bothsteps	equal	0	Success at all eik	This sg doesnt have any
76	HIZJIK_FSR	-1e-05	-2e-05	1e-05	0.01701	0	-0.01703	0.01829	0.01369	0.00938	0	0.00633	0	-1e-05	1e-05	-3e-05	0.02337	1e-05	0.00179	0.0305239	2	Na4-H8-C28-O12-F20	0	0	equal_bothsteps	equal	0	Success at all eik	This sg doesnt have any
77	BALFAV01_FSR	2.25029	-0.7813	-0.31603	-0.00026	0.01376	-0.06617	-0.77782	1.40441	-0.20864	-0.1162	0.01193	0.03255	0.01254	-0.06608	-0.00224	-0.04579	-0.00608	0.01205	2.72132	1	C10-H8-Mo2-N2-O6	0	0	equal_bothsteps	equal	0	Success at all eik	This sg doesnt have any
78	XUNTUX_FSR	0.13877	0.21015	0.00691	0	-0.00748	0	1e-05	3e-05	1e-05	-0.06462	3e-05	0.0979	0.00542	0.00612	0.04992	0	0.06097	0	0.252168	m	C12-H12-Li2-N2-O6	0	0	equal_bothsteps	equal	0	Success at all eik	This sg doesnt have any
79	LEQGUJ_FSR	-0.25135	0.01651	-0.03654	0	0.00674	0	0.00015	-0.0001	-9e-05	0.02625	-0.0002	-0.08741	0.14861	-0.10856	-0.14409	0	-0.05351	0	0.309192	m	C12-H16-Mg2-N4-O14	0	0	equal_bothsteps	equal	0	Success at all eik	This sg doesnt have any
80	YOTDUH_FSR	8e-05	2e-05	8e-05	0.02661	-2e-05	0.02431	0.02134	-0.02837	0.01566	0	-0.01143	0	2e-05	7e-05	2e-05	-0.00231	-6e-05	0.01719	0.0404495	2	C14-Cl2-H20-N2-Na2-O7-S2	0	0	equal_bothsteps	equal	0	Success at all eik	This sg doesnt have any
81	AVUFED01_FSR	-0.05029	0.02779	-0.16713	-0.11331	-0.01513	-0.03227	-0.08753	-0.17273	0.11096	0.07855	-0.02875	0.11491	-0.25733	0.01642	-0.15963	0.04041	-0.15583	-0.02107	0.36808	1	Na1-H7-C8-S1-O8	0	0	equal_bothsteps	equal	0	This sg doesnt have any	This sg doesnt have any
82	SUHHOT_FSR	-0.06041	0.07255	-0.00918	-0.02714	-0.09098	0.00606	-0.16251	0.06742	-0.04172	0.02832	-0.00917	-0.04493	-0.16037	-0.05925	-0.15175	-0.08761	-0.00432	-0.02779	0.286601	1	La2-H20-C12-O22	0	0	equal_bothsteps	equal	0	This sg doesnt have any	This sg doesnt have any
83	AVOLAZ_FSR	0.08011	0.06613	0.04006	-0.00852	-0.03135	0.00365	-0.06237	0.09727	-0.05781	0.138	0.00588	0.05298	0.02097	0.01728	-0.02223	-0.07577	0.01991	-0.01116	0.203361	1	Na1-Zn3-H13-C19-O17	0	0	equal_bothsteps	equal	0	This sg doesnt have any	This sg doesnt have any
84	EMAQUG_FSR	0	0	0	0.00067	0	0.02825	-0.05088	-0.28003	0.08854	0	-0.06181	0	0	1e-05	0	0.03736	0	-0.04118	0.30441	2	Li4-Mg2-H40-C22-N4-O22	0	0	equal_bothsteps	equal	0	Success at all eik	This sg doesnt have any
85	PEJFAN_FSR	0.00054	0.00015	-8e-05	0	-0.15432	0	-0.00059	-0.00014	6e-05	0.01738	0	0	-0.71235	-0.09301	0.13341	0	0	0	0.730679	mm2	C30-H24-N4-O8-Pb2	0	0	equal_bothsteps	equal	0	Success at all eik	This sg doesnt have any
86	OGUMUZ_FSR	-1e-05	0	0	-0.06002	-1e-05	-0.0391	-0.03993	-0.00904	0.03449	0	-0.07482	0	0.00011	0	2e-05	-0.09616	7e-05	-0.05328	0.131143	2	Ni2-H32-C34-S2-N4-O14	0	0	equal_bothsteps	equal	0	Success at all eik	This sg doesnt have any
87	AXAWIH_FSR	0.00114	0.00036	-0.00014	-0.01146	0.00042	-0.02344	-0.0758	0.1616	0.0235	0	-0.04721	0	-0.0005	-2e-05	0.00073	0.11631	-0.00018	-0.02247	0.186122	2	C34-Cl2-H30-Hg1-N6-O4	0	0	equal_bothsteps	equal	0	Success at all eik	This sg doesnt have any
88	GIHKEO_FSR	0.00016	-1e-05	0.0001	-0.00238	5e-05	0.02031	-0.07483	-0.00436	-0.04264	0	-0.00875	0	-0.00015	-9e-05	0.00013	-0.03957	-8e-05	-0.01276	0.0866794	2	Br2-C12-H16-N2-Na2-O7-S2	0	0	equal_bothsteps	equal	0	Success at all eik	This sg doesnt have any
89	UHOTER_FSR	0	0	0	0	-0.02729	0	-9e-05	0.00017	-0.00026	-0.0089	0	0	-0.07877	-0.05093	0.07009	0	0	0	0.117095	mm2	Li4-H28-C32-Cl8-O20	0	0	equal_bothsteps	equal	0	Success at all eik	This sg doesnt have any
90	PAJFEL_FSR	-1e-05	6e-05	-1e-05	-0.01007	-1e-05	-0.0569	0.0045	-0.0384	-0.13224	0	-0.05178	0	-4e-05	6e-05	0	-0.12158	5e-05	0.05421	0.147185	2	C20-H26-N4-Na2-O12	0	0	equal_bothsteps	equal	0	Success at all eik	This sg doesnt have any
91	MISKEH_FSR	0	0	0	0	-0.01938	0	-4e-05	0	3e-05	0.04003	0	0	0.09431	0.03967	-0.19678	0	0	0	0.221789	mm2	Li4-H36-C20-I4-N4-O8	0	0	equal_bothsteps	equal	0	Success at all eik	This sg doesnt have any
92	EXOKOS_FSR	0.00397	0.00279	0.00119	-0.06597	-0.00015	0.06875	0.0368	0.05373	0.04805	0	-0.02321	0	-0.00044	-0.00034	-3e-05	0.0845	-4e-05	-0.03294	0.128558	2	C18-H20-O8-P2-Pb1	0	0	equal_bothsteps	equal	0	Success at all eik	This sg doesnt have any
93	NIHMUO_FSR	3e-05	0.00011	0.00015	0.11097	0	0.08708	0.05086	0.25146	-0.00842	0	0.07014	0	-2e-05	-4e-05	-0.00015	-0.1665	3e-05	0.06086	0.2661	2	C24-H16-N2-O4-Pb1	0	0	equal_bothsteps	equal	0	Success at all eik	This sg doesnt have any
94	LORMOU01_FSR	-0.00018	-0.00021	-0.00018	0.07243	-4e-05	-0.03857	-0.02197	0.01104	-0.16281	0	0.07566	0	-0.00013	-0.0001	-6e-05	-0.1984	2e-05	0.08217	0.229768	2	Na2-B2-H16-C16-O20	0	0	equal_bothsteps	equal	0	Success at all eik	This sg doesnt have any
95	PARQEG_FSR	0	0	0	-0.04519	0	-0.03066	-0.00653	-0.13408	-0.06917	0	0.00754	0	2e-05	0	2e-05	-0.02778	0	0.00446	0.1512	2	Na2-H40-C34-N2-O8	0	0	equal_bothsteps	equal	0	Success at all eik	This sg doesnt have any
96	BUTXOE_FSR	0.11153	-0.00479	-0.03663	0	-0.03075	0	-4e-05	-3e-05	1e-05	0.0386	4e-05	-0.08612	0.13092	0.0463	-0.22845	0	-0.08377	0	0.295511	m	C20-H12-Hg4-N8-O8	0	0	equal_bothsteps	equal	0	Success at all eik	This sg doesnt have any
97	VAXVAT_FSR	0.16138	-0.1992	-0.03113	-0.05199	0.14363	0.28375	0.0084	0.22205	0.01682	-0.03805	-0.0763	0.07456	-0.03196	-0.03885	-0.04508	0.17668	0.10188	-0.0221	0.423854	1	Na1-Mo2-H22-C14-N3-O15	0	0	equal_bothsteps	equal	0	This sg doesnt have any	This sg doesnt have any
98	XEFKUR_FSR	0.00036	4e-05	1e-05	0.0118	-6e-05	0.0139	-0.02767	0.07308	-0.05471	0	-0.00996	0	5e-05	-2e-05	8e-05	-0.00456	0	0.0193	0.0959099	2	Li2-B2-H28-C32-O14	0	0	equal_bothsteps	equal	0	Success at all eik	This sg doesnt have any
99	TEVQIU01_FSR	-6e-05	-9e-05	-7e-05	-0.02312	-3e-05	-0.06811	-0.09651	0.03822	-0.01133	0	-0.03615	0	0	0	0	-0.04902	0	-0.10049	0.132726	2	C30-Cl4-H54-Hg4-N2-S4	0	0	equal_bothsteps	equal	0	Success at all eik	This sg doesnt have any
100	ZOMNEW_FSR	2e-05	1e-05	-2e-05	-0.01455	1e-05	-0.07685	-0.07576	-0.06485	0.01002	0	-0.05314	0	-2e-05	0	-1e-05	0.00071	0	-0.08115	0.113443	2	C14-H18-Mo1-N4-O4-Zn1	0	0	equal_bothsteps	equal	0	Success at all eik	This sg doesnt have any
101	RURDEP_FSR	0.04794	-0.14355	-0.18122	0	-0.16667	0	-0.00014	-7e-05	-6e-05	-0.23537	0	-0.03654	-0.22741	-0.37036	-0.0193	0	-0.17792	0	0.50421	m	B10-C8-H14-La4-O28	0	0	equal_bothsteps	equal	0	Success at all eik	This sg doesnt have any
102	DORFOG_FSR	0	-6e-05	0	0.00062	0.04058	4e-05	-4e-05	7e-05	0	0.04058	-0.00061	-7e-05	0.10025	0.10025	0.24281	0	0	0	0.28117	4	Mg4-H32-C16-O28	0	0	equal_bothsteps	equal	0	Success at all eik	Success at all eik
103	TAHVOQ_FSR	-7e-05	-7e-05	7e-05	-0.00127	5e-05	0.02202	0.10771	-0.0045	0.03179	0	-0.04573	0	3e-05	0	7e-05	0.03574	1e-05	-0.00572	0.121341	2	H40-Pb2-C40-O10	0	0	equal_bothsteps	equal	0	Success at all eik	This sg doesnt have any
104	DORREI_FSR	0.04963	0.12358	0.05924	-0.04539	0.02595	0.0191	0.00325	-0.01268	-0.00532	0.03466	0.00017	0.12812	-0.00811	0.01284	0.00509	-0.03322	0.04099	-0.08623	0.168091	1	Na2-H24-C12-S2-O17	0	0	equal_bothsteps	equal	0	This sg doesnt have any	This sg doesnt have any
105	BEMLAI_FSR	-6e-05	2e-05	-6e-05	0.12121	0	-0.03405	-0.09342	-0.37766	0.13574	0	0.10258	0	1e-05	-4e-05	0.0001	0.18206	9e-05	0.04564	0.42462	2	Li2-H8-C14-O6-F6	0	0	equal_bothsteps	equal	0	Success at all eik	This sg doesnt have any
106	ROPWEA_FSR	-0.00019	-0.00023	-0.00049	0.04459	-0.00019	0.02132	0.04241	0.28229	0.02084	0	0.04956	0	-0.0006	-0.00025	-0.00172	0.25455	-0.00076	0.0959	0.290484	2	Mo2-H24-C30-N4-O12	0	0	equal_bothsteps	equal	0	Success at all eik	This sg doesnt have any
107	BIYXEN_FSR	5e-05	-6e-05	6e-05	0.13651	3e-05	-0.05125	0.05022	-0.15177	0.01122	0	-0.04259	0	-4e-05	-5e-05	5e-05	-0.05901	-2e-05	0.03058	0.165819	2	Zn2-Mo4-H28-C12-S8-N4-O16	0	0	equal_bothsteps	equal	0	Success at all eik	This sg doesnt have any
108	UVIGIR_FSR	0.02554	0.00071	0.02569	0	0.04484	0	3e-05	-1e-05	1e-05	-0.03318	-2e-05	0.02743	0.03992	-0.0278	-0.08712	0	0.04046	0	0.107858	m	C20-H52-Li2-N2-O16-S4	0	0	equal_bothsteps	equal	0	Success at all eik	This sg doesnt have any
109	EBUQID_FSR	0.07678	-0.02762	0.09528	0	-0.15229	0	7e-05	2e-05	-1e-05	-0.08531	3e-05	-0.04047	0.01988	-0.20501	0.15045	0	0.07801	0	0.271682	m	C24-H18-I4-N6-Pb2	0	0	equal_bothsteps	equal	0	Success at all eik	This sg doesnt have any
110	EFOZIK_FSR	0.00012	-8e-05	-0.00022	-0.00024	-0.08492	-0.05852	-0.05861	0.05863	-0.00012	-0.08459	0	0	-0.00187	-0.00187	-0.28735	0	0	0	0.287362	3m	C36-H24-N6-Na2-O18-Zn2	0	0	equal_bothsteps	equal	0	Success at all eik	Success at all eik
111	BUKXUC_FSR	0	-1e-05	-1e-05	0.00566	1e-05	-0.00273	0.01888	0.01709	0.08629	0	-0.02936	0	-1e-05	-1e-05	0	0.03765	-1e-05	-0.01916	0.0946388	2	Li4-H44-C32-N8-O8	0	0	equal_bothsteps	equal	0	Success at all eik	This sg doesnt have any
112	KEBSOA_FSR	0.0234	-0.25518	-0.01707	0	0.02518	0	8e-05	0.0001	0	-0.07005	0	-0.17756	0.1159	0.10217	-0.0231	0	0.03124	0	0.276149	m	C18-H30-La2-O24	0	0	equal_bothsteps	equal	0	Success at all eik	This sg doesnt have any
113	NIZFEJ_FSR	-1e-05	0.00026	0.00019	-0.12706	-5e-05	0.00094	0.05018	0.13812	0.05705	0	-0.05139	0	3e-05	-0.00016	2e-05	-0.0402	-2e-05	-0.0261	0.165804	2	Na2-P2-H32-C22-N4-O16	0	0	equal_bothsteps	equal	0	Success at all eik	This sg doesnt have any
114	BOPCIT_FSR	-0.00163	-0.01608	0.03102	-0.0232	0.04564	-0.02467	0.02214	-0.04671	0.01646	-0.02126	0.00799	-0.0241	0.03174	0.01739	0.01447	-0.00328	0.00201	-0.0069	0.0836503	1	Mg1-H26-C30-N2-O10-F2	0	0	equal_bothsteps	equal	0	This sg doesnt have any	This sg doesnt have any
115	AFOVAT_FSR	0.00013	-0.00304	0.00212	0.0205	0.0002	-0.10404	0.00868	0.18857	0.09775	0	-0.04145	0	0.00101	0.0031	0.00037	-0.08143	0.00057	0.11398	0.216648	2	C44-H28-La2-O16	0	0	equal_bothsteps	equal	0	Success at all eik	This sg doesnt have any
116	HEBTOA_FSR	-3e-05	0	8e-05	0.03808	-3e-05	-0.19225	-0.21666	0.33356	-0.39201	0	0.05128	0	6e-05	0	-9e-05	-0.30554	5e-05	0.03541	0.560808	2	Na6-B10-H4-C2-O22	0	0	equal_bothsteps	equal	0	Success at all eik	This sg doesnt have any
117	OBAGOQ_FSR	-0.00033	-8e-05	7e-05	0.03085	3e-05	0.06404	-0.00102	0.10587	-0.00253	0	-0.00212	0	3e-05	-2e-05	6e-05	-0.04111	-4e-05	0.06474	0.105926	2	La2-H24-C36-N6-O12	0	0	equal_bothsteps	equal	0	Success at all eik	This sg doesnt have any
118	UNUQAX_FSR	0.07005	0.00024	-0.09377	0	-0.07994	0	-3e-05	3e-05	-2e-05	0.00238	3e-05	0.01315	5e-05	0.05541	-0.12383	0	-0.05165	0	0.190646	m	C38-H48-Li2-O2-P2	0	0	equal_bothsteps	equal	0	Success at all eik	This sg doesnt have any
119	LESJID_FSR	0.00023	-2e-05	-5e-05	0	-0.05891	0	0.00017	0	0.00013	0.00576	0	0	-0.06443	-0.08682	-0.16735	0	0	0	0.199236	mm2	C20-Cl4-H20-N4-Pb2	0	0	equal_bothsteps	equal	0	Success at all eik	This sg doesnt have any
120	HUSJUC_FSR	0.19403	-0.1191	0.18171	0	0.12693	0	0.00012	0.00011	0.00014	-0.09806	2e-05	-0.11469	0.23206	-0.09929	0.21014	0	0.16118	0	0.483803	m	C42-H22-La2-O14	0	0	equal_bothsteps	equal	0	Success at all eik	This sg doesnt have any
121	GOZMIT_FSR	0.05895	-0.02569	0.0377	0	-0.0322	0	-2e-05	1e-05	1e-05	-0.05616	0	0.00875	-0.17541	-0.06752	-0.13449	0	0.00814	0	0.239399	m	C24-H14-La2-N4-O14	0	0	equal_bothsteps	equal	0	Success at all eik	This sg doesnt have any
122	RURJOF_FSR	0.09251	-0.02949	-0.18219	0	-0.07723	0	5e-05	0.00021	0.00025	-0.215	5e-05	0.03999	-0.21233	-0.34149	0.04129	0	-0.12129	0	0.422581	m	B10-C8-H14-La4-O28	0	0	equal_bothsteps	equal	0	Success at all eik	This sg doesnt have any
123	OJEPIE_FSR	-2e-05	0	3e-05	0	-0.04087	0	-1e-05	0	-2e-05	-0.01082	0	0	-0.00072	0.15281	-0.11709	0	0	0	0.192514	mm2	Hg4-H44-C24-S4-I4	0	0	equal_bothsteps	equal	0	Success at all eik	This sg doesnt have any
124	LAYZIW_FSR	2e-05	9e-05	7e-05	0	-0.1151	0	0.00011	0.00015	3e-05	-0.21062	0	0	0.14189	-0.26982	-0.07405	0	0	0	0.313718	mm2	Mg4-H24-C12-N16-O16	0	0	equal_bothsteps	equal	0	Success at all eik	This sg doesnt have any
125	MISLAE_FSR	0	0	0	0	-0.02305	0	0	0	0	0.03903	0	0	0.1075	0.0587	-0.20625	0	0	0	0.239877	mm2	Li4-H36-C20-Br4-N4-O8	0	0	equal_bothsteps	equal	0	Success at all eik	This sg doesnt have any
126	RUGNUE_FSR	-4e-05	2e-05	3e-05	-0.15798	1e-05	-0.01319	-0.07516	-0.16751	0.10263	0	0.03042	0	-1e-05	1e-05	-3e-05	-0.04923	0	0.00933	0.212525	2	C5-H9-N2-O8-Y1	0	0	equal_bothsteps	equal	0	Success at all eik	This sg doesnt have any
127	EPOJAV_FSR	-0.01375	-0.00483	-0.03228	0.04678	-0.03994	0.00764	0.02927	-0.02827	0.10067	-0.01168	0.03702	0.01788	-0.02284	0.00748	0.03387	0.0304	-0.01081	0.0302	0.128165	1	Sn2-H28-C20-N2-Cl2-O4	0	0	equal_bothsteps	equal	0	This sg doesnt have any	This sg doesnt have any
128	EGEQAJ_FSR	-4e-05	6e-05	4e-05	-0.08151	1e-05	0.16543	0.22817	-0.20117	-0.08044	0	0.12197	0	-3e-05	1e-05	-7e-05	-0.0097	3e-05	-0.0887	0.337458	2	Sn2-P4-H28-C12-N4-O12	0	0	equal_bothsteps	equal	0	Success at all eik	This sg doesnt have any
129	OMEDOZ_FSR	0	5e-05	0	-0.02003	-2e-05	-0.10065	-0.09055	-0.08687	-0.08465	0	-0.01714	0	-2e-05	-2e-05	0	-0.17134	-1e-05	-0.05352	0.188029	2	Tl2-B2-H28-C32-N12	0	0	equal_bothsteps	equal	0	Success at all eik	This sg doesnt have any
130	TAKSAZ_FSR	0.08197	0.26179	0.33315	0	-0.01666	0	0	0	0	-0.0867	0	-0.03285	-0.28836	-0.30892	-0.01261	0	-0.00648	0	0.539743	m	Tl2-H10-C6-N4-O8	0	0	equal_bothsteps	equal	0	Success at all eik	This sg doesnt have any
131	RUYFOH01_FSR	1e-05	4e-05	-1e-05	0.01135	0	0.15507	0.11605	0.31839	0.03478	0	0.03238	0	-0.00026	3e-05	8e-05	0.08639	-6e-05	-0.04526	0.342196	2	C16-H8-O8-Sn2	0	0	equal_bothsteps	equal	0	Success at all eik	This sg doesnt have any
132	CEBFUL01_FSR	0.00169	-0.01907	0.0475	0	-0.01033	0	0	1e-05	0	0.04434	0	0.01223	0.04914	0.01447	-0.00557	0	0.03107	0	0.0638113	m	C24-H40-O26-Y4	0	0	equal_bothsteps	equal	0	Success at all eik	This sg doesnt have any
133	RUGJAG_FSR	-1e-05	3e-05	3e-05	0.14131	0	0.05864	0.26599	0.27424	-0.13021	0	-0.01416	0	4e-05	3e-05	-4e-05	0.05791	0	-0.04193	0.403873	2	C5-H9-N2-O8-Yb1	0	0	equal_bothsteps	equal	0	Success at all eik	This sg doesnt have any
134	QETBOJ_FSR	-0.0002	0.00055	0.00042	0.03017	6e-05	-0.00758	0.00594	-0.04036	-0.0804	0	0.00965	0	-6e-05	-0.00015	-0.00028	-0.04061	0.00012	-0.03678	0.0906764	2	Mn2-H36-C36-N4-O10	0	10	notequal_bothsteps	equal	0	Success at all eik	This sg doesnt have any
135	YITMAQ01_FSR	0.18361	-0.0622	-0.044	-0.0026	0.05653	-0.07324	-0.01035	-0.21008	-0.03229	0.04497	0.01338	0.0172	0.04415	0.06969	0.04807	-0.04446	-0.00332	-0.00574	0.251122	1	Sn1-H21-C13-N1-F2	0	0	equal_bothsteps	equal	0	This sg doesnt have any	This sg doesnt have any
136	ZIXCOA_FSR	-1e-05	-2e-05	-2e-05	-0.00964	-4e-05	-0.01774	0.16762	0.21528	-0.10826	0	0.13488	0	4e-05	-5e-05	-5e-05	0.03977	1e-05	0.02964	0.32304	2	Sr2-H36-C20-O24	0	0	equal_bothsteps	equal	0	Success at all eik	This sg doesnt have any
137	OJOBIY01_FSR	-0.51754	-0.04666	0.11501	-0.12013	0.02686	-0.12293	-0.16269	-0.009	-0.03128	-0.12371	0.03584	-0.01408	0.76475	0.03629	-0.23052	0.18043	-0.10453	0.08546	1.01443	mm2	C12-H20-Mn2-N4-O10	6	10	notequal_bothsteps	notequal	10	Failed at e36	This sg doesnt have any
138	SOCCUI01_FSR	-0.10102	-0.17548	-0.01074	0	0.05671	0	-0.00014	0	0.00018	0.03472	0.00033	-0.01395	-0.15325	0.08639	-0.40224	0	-0.00877	0	0.439247	m	C20-Cl6-H16-Mn2-N4	8	8	equal_bothsteps	equal	8	Success at all eik	This sg doesnt have any
139	WEHVOV_FSR	-0.00014	-5e-05	-0.00015	-0.05474	4e-05	0.03747	0.14891	0.19524	0.03404	0	0.04717	0	0.00015	0.00023	0.00015	-0.14234	5e-05	0.06984	0.252342	2	Mn2-H32-C20-S2-O18	10	10	equal_bothsteps	equal	10	Success at all eik	This sg doesnt have any
140	QUBPUY_FSR	1e-05	0	3e-05	0.00915	2e-05	-0.05708	-0.00063	0.09005	0.03948	0	0.01877	0	-4e-05	-3e-05	-4e-05	0.00529	0	0.04022	0.100102	2	Tl2-B2-H26-C42-S12-N6	0	0	equal_bothsteps	equal	0	Success at all eik	This sg doesnt have any
141	HACGID_FSR	2e-05	1e-05	4e-05	0.00334	0	-0.00312	-0.00596	-0.21151	-0.02858	0	0.04876	0	1e-05	2e-05	7e-05	-0.01166	-1e-05	0.04513	0.219012	2	Tl4-H32-C20-N4-O16	0	0	equal_bothsteps	equal	0	Success at all eik	This sg doesnt have any
142	DAWSEB_FSR	4e-05	-4e-05	-1e-05	-0.00448	-4e-05	-0.14051	-0.06757	-0.12642	-0.15655	0	-0.01048	0	-0.00017	-0.00021	-3e-05	-0.10307	-2e-05	0.0643	0.212522	2	Mn2-H16-C18-O12	10	10	equal_bothsteps	equal	10	Success at all eik	This sg doesnt have any
143	UYURUC_FSR	-1e-05	-7e-05	2e-05	0	-0.28832	0	0.00015	-0.00106	-0.0013	-0.0982	0	0	-0.00212	-0.11374	-0.6331	0	0	0	0.643241	mm2	C12-H16-N16-O10-Sr2	0	0	equal_bothsteps	equal	0	Success at all eik	This sg doesnt have any
144	ROJSUF_FSR	-0.02532	-0.1224	0.06059	-0.00101	0.09988	0.00023	0.00023	0.00098	9e-05	0.04063	0.00048	-0.02808	0.06464	0.15438	-0.16959	-0.00169	0.03585	6e-05	0.272879	m	C4-H10-O12-P2-S2-Sr2	0	0	equal_bothsteps	equal	0	Success at all eik	This sg doesnt have any
145	EKIHAI_FSR	0	0	0	0.05884	0	0.06092	0.12617	-0.18215	0.10072	0	0.04428	0	0	0	0	-0.03967	0	0.05991	0.247392	2	Mn2-H18-C10-S2-N2-O10	10	10	equal_bothsteps	equal	10	Success at all eik	This sg doesnt have any
146	KACJAB_FSR	0	0	0	0	0.02669	0	0	0	0	0.01893	0	0	0.04151	-0.03407	-0.01395	0	0	0	0.0554838	mm2	C24-H20-Pd2-S4	0	0	equal_bothsteps	equal	0	Success at all eik	This sg doesnt have any
147	EQADEH_FSR	2e-05	4e-05	3e-05	0	0.00254	0	0.00231	-0.00363	-0.00035	0.00961	0	0	0.18161	0.06897	0.31661	0	0	0	0.371458	mm2	C40-H32-N8-O12-W4	0	0	equal_bothsteps	equal	0	Success at all eik	This sg doesnt have any
148	XASVET_FSR	7e-05	-8e-05	-7e-05	-0.02422	4e-05	-0.14361	-0.28763	-0.38919	0.35912	0	0.07429	0	-7e-05	-7e-05	-8e-05	0.00833	-1e-05	-0.02339	0.607195	2	Tl4-H8-C16-O8	0	0	equal_bothsteps	equal	0	Success at all eik	This sg doesnt have any
149	CEBFUL_FSR	0.00344	-0.02224	0.05091	0	-0.00397	0	0	-1e-05	0	0.04321	0	0.01049	0.05344	0.02233	-0.00521	0	0.03358	0	0.0693393	m	C24-H40-O26-Y4	0	0	equal_bothsteps	equal	0	Success at all eik	This sg doesnt have any
150	LINJEY_FSR	0	2e-05	0	0	-0.02694	0	2e-05	-0.00011	4e-05	-0.03048	0	0	0.02483	0.00529	-0.10735	0	0	0	0.110311	mm2	C28-H24-N4-O8-Tl4	0	0	equal_bothsteps	equal	0	Success at all eik	This sg doesnt have any
151	JIPLEA_FSR	0	0	0	0	-0.00885	0	0	0	0	-0.00773	0	0	0.00054	0.05056	-0.13501	0	0	0	0.144168	mm2	C12-H18-O12-Yb2	0	0	equal_bothsteps	equal	0	Success at all eik	This sg doesnt have any
152	FAMZIE_FSR	-1e-05	-3e-05	0	-0.03799	-4e-05	-0.04427	-0.14401	-0.20066	-0.07225	0	-0.15033	0	2e-05	5e-05	1e-05	0.00283	3e-05	0.02388	0.298031	2	C20-H44-O10-Sn4	0	0	equal_bothsteps	equal	0	Success at all eik	This sg doesnt have any
153	DOCGAG_FSR	0.02723	-0.02763	-4e-05	0.00053	-0.04061	0.05651	0.05665	-0.05684	-6e-05	-0.04043	0.00038	-0.0275	0.0238	0.0238	0.14516	0	0	0	0.149011	3	Sr3-H33-C33-N3-O18	0	0	equal_bothsteps	equal	0	Success at all eik	Success at all eik
154	SUZXOA_FSR	-0.17351	-0.10668	-0.02618	0	0.30062	0	-0.00097	-0.00026	-0.00247	0.13391	0.00039	-0.10844	0.24338	-0.01489	0.36838	0	0.00213	0	0.471757	m	C12-H10-O6-P2-Sn2	0	0	equal_bothsteps	equal	0	Success at all eik	This sg doesnt have any
155	YEMNUA_FSR	-0.0139	-0.03109	-0.01469	0.02885	-0.01908	0.02847	0.02974	0.01308	-0.00109	-0.00429	0.0141	-0.02042	-0.02014	-0.00796	-0.03174	0.01543	-0.02948	0.01741	0.0819881	1	Sn1-H20-C22-O4-F8	0	0	equal_bothsteps	equal	0	This sg doesnt have any	This sg doesnt have any
156	XEZZIL_FSR	0.05258	-0.03076	-0.04879	0.02145	0.04519	-0.06252	-0.0223	0.02537	0.01566	0.04061	-0.01352	0.00752	0.05867	0.03988	0.00291	-0.00299	-0.04673	0.00671	0.116154	1	V6-Zn2-H22-C30-N6-O17	0	0	equal_bothsteps	equal	0	This sg doesnt have any	This sg doesnt have any
157	FIRZAJ_FSR	0.00017	3e-05	-0.00023	-0.01029	0.0001	0.10538	0.05764	0.14265	-0.01705	0	0.07341	0	0.0001	0	-0.00014	0.02305	5e-05	0.17398	0.20392	2	Mn4-H20-C16-O26	20	20	equal_bothsteps	equal	20	Success at all eik	This sg doesnt have any
158	CUFCEN_FSR	0.07061	0.13595	0.10669	-0.07188	0.00253	0.13685	0.07383	0.07605	0.11968	-0.05765	0.00826	0.07309	-0.08334	-0.10811	-0.05443	0.08151	0.10826	-0.24095	0.414584	1	Mn2-H18-C16-N2-O12	4	4	equal_bothsteps	equal	4	This sg doesnt have any	This sg doesnt have any
159	FEFPAJ_FSR	-5e-05	6e-05	-1e-05	0.03137	1e-05	0.00353	-0.01452	0.05749	0.10759	0	0.01358	0	1e-05	3e-05	5e-05	0.02598	-3e-05	0.01329	0.123596	2	Mn2-H34-C14-Br4-N2-O8	10	10	equal_bothsteps	equal	10	Success at all eik	This sg doesnt have any
160	FOMNOM_FSR	0.05793	0.00766	0.0456	0.00589	0.02016	-0.0512	-0.04089	0.02998	0.02801	0.02036	0.04273	-0.03069	0.01162	0.00484	-0.00291	0.0142	-0.01841	0.00401	0.0976647	1	Sn2-H40-C28-N4-O12	0	0	equal_bothsteps	equal	0	This sg doesnt have any	This sg doesnt have any
161	IDIWOH02_FSR	0.38451	-0.05209	-0.03717	-0.00453	0.10708	0.03779	0.07177	0.01089	-0.06482	0.04731	-0.08939	0.14675	0.06182	-0.01449	0.06556	-0.03892	0.12689	-0.10471	0.418255	1	V2-H8-C16-O10	0	0	equal_bothsteps	equal	0	This sg doesnt have any	This sg doesnt have any
162	KACHUT_FSR	0.00175	0.00165	0.00022	0	0.01684	0	0	0	0	0.01681	0	0	0.00738	0.00738	-0.00317	0	0	0	0.0171126	4mm	C48-H40-Pt4-S8	0	0	equal_bothsteps	equal	0	Success at all eik	Success at all eik
163	CUGSUT_FSR	-3e-05	-3e-05	-8e-05	0.03121	-1e-05	-0.08626	0.17807	-0.10511	0.44619	0	0.04546	0	-6e-05	-8e-05	-0.00016	-0.17533	-5e-05	-0.01578	0.493872	2	Sr2-H12-C8-O14	0	0	equal_bothsteps	equal	0	Success at all eik	This sg doesnt have any
164	LONSIQ_FSR	-0.38067	-0.14065	0.15585	0	-0.01088	0	0	-1e-05	1e-05	0.002	1e-05	-0.35202	0.0325	0.16033	0.03195	0	-0.04303	0	0.440878	m	C20-H16-N4-O6-W2	0	0	equal_bothsteps	equal	0	Success at all eik	This sg doesnt have any
165	QQQBKV10_FSR	0	0	0	0	-0.01439	0	0	0	0	0.58462	0	0	0.80986	0.7872	0.04974	0	0	0	1.1305	mm2	Tl4-H4-C4-O8	0	0	equal_bothsteps	equal	0	Success at all eik	This sg doesnt have any
166	EXERIJ_FSR	0	0	0	-0.05416	0	0.03226	0.05698	-0.2276	-0.06267	0	-0.08965	0	0	0	-1e-05	0.00849	0	-0.06977	0.258869	2	Zn2-As2-H32-C36-N6-O10	0	0	equal_bothsteps	equal	0	Success at all eik	This sg doesnt have any
167	BIFSUF_FSR	-0.21396	0.01425	-0.43985	-0.03746	-0.01485	-0.04831	-0.03565	-0.23477	-0.56451	-0.016	-0.03115	-0.01154	0.03764	0.03421	-0.32809	-0.11611	-0.09204	-0.0079	0.819201	1	Zn2-H8-C10-N2-O6	0	0	equal_bothsteps	equal	0	This sg doesnt have any	This sg doesnt have any
168	WATYIB_FSR	-4e-05	-6e-05	-8e-05	-0.0333	0	-0.00053	-0.0144	-0.00567	-0.00671	0	-0.03052	0	9e-05	7e-05	-5e-05	0.01475	5e-05	-0.03215	0.0407387	2	C44-F6-H30-N6-O12-Si1-Zn1	0	0	equal_bothsteps	equal	0	Success at all eik	This sg doesnt have any
169	LMETZN_FSR	1e-05	0	1e-05	0.05735	0	0.13396	0.10959	0.14479	0.01636	0	0.08588	0	0	0	1e-05	0.05681	-1e-05	0.02873	0.201537	2	Zn2-H40-C20-S4-N4-O8	0	0	equal_bothsteps	equal	0	Success at all eik	This sg doesnt have any
170	COHVOM01_FSR	-0.01476	0.00613	-0.07569	0	0.05592	0	1e-05	-1e-05	1e-05	-0.00127	0	0.06296	-0.02602	0.02452	-0.05231	0	-0.0242	0	0.103549	m	Br4-C24-H20-N4-O4-Zn2	0	0	equal_bothsteps	equal	0	Success at all eik	This sg doesnt have any
171	KIHVOP_FSR	0	0	0	0	0.05073	0	0	0	0	0.08527	0	0	-0.06423	0.00768	-0.33695	0	0	0	0.343103	mm2	Zn4-P4-H36-C24-N8-O12	0	0	equal_bothsteps	equal	0	Success at all eik	This sg doesnt have any
172	LENRIG_FSR	-0.00012	-0.00082	-9e-05	0	-0.01858	0	-7e-05	-0.00035	-0.00023	0.02013	0	0	0.08924	-0.10314	0.33972	0	0	0	0.366076	mm2	C36-F4-H28-N8-O12-S4-Zn4	0	0	equal_bothsteps	equal	0	Success at all eik	This sg doesnt have any
173	MUQVEA_FSR	0	0	0	0	0.0113	0	-8e-05	3e-05	2e-05	-0.06862	0	0	-0.29166	-0.17769	0.04434	0	0	0	0.344391	mm2	Zn2-B2-H18-C4-N22-Cl2	0	0	equal_bothsteps	equal	0	Success at all eik	This sg doesnt have any
174	GIWBOF_FSR	-0.00154	0.0007	0.00182	0.00548	0.00021	0.0014	0.02649	-0.0291	-0.00149	0	0.00492	0	-0.00017	5e-05	0.00011	-0.01193	1e-05	0.01209	0.0397182	2	C24-F6-H16-N2-O4-Zn1	0	0	equal_bothsteps	equal	0	Success at all eik	This sg doesnt have any
175	NAMCUA_FSR	0	-2e-05	-7e-05	0.09518	0	0.07091	-0.04724	0.07146	0.09573	0	0.04818	0	6e-05	3e-05	-1e-05	-0.07617	3e-05	0.03015	0.1372	2	Zn2-H18-C10-S2-N2-O10	0	0	equal_bothsteps	equal	0	Success at all eik	This sg doesnt have any
176	WOQJIW03_FSR	-3e-05	0	4e-05	0	-0.09994	0	0.00015	1e-05	1e-05	-0.11157	0	0	-0.0159	-0.10044	0.39442	0	0	0	0.407318	mm2	C10-H28-N4-Te4-Zn4	0	0	equal_bothsteps	equal	0	Success at all eik	This sg doesnt have any
177	FAVNEY_FSR	-0.33664	0.09123	-0.12926	0	0.15623	0	-3e-05	-5e-05	-0.00012	0.01465	-9e-05	-0.00951	0.32167	0.17755	-0.10576	0	0.02725	0	0.478986	m	Zn2-P2-H8-C12-N2-O10	0	0	equal_bothsteps	equal	0	Success at all eik	This sg doesnt have any
178	NASCAN_FSR	-3e-05	-1e-05	0	0	-0.16059	0	9e-05	3e-05	3e-05	-0.16758	0	0	-0.0677	-0.13862	0.5615	0	0	0	0.582307	mm2	C6-H20-N4-S4-Zn4	0	0	equal_bothsteps	equal	0	Success at all eik	This sg doesnt have any
179	TILZUM_FSR	-3e-05	-6e-05	0	0.0385	-5e-05	0.02137	0.1621	-0.03322	0.0198	0	-0.0085	0	-0.00019	0.00018	0.00018	0.00121	0.00016	0.00255	0.166866	2	Cu4-H20-C22-Se2-I4-N4	0	0	equal_bothsteps	equal	0	Success at all eik	This sg doesnt have any
180	XAKYAK_FSR	-0.09656	0.06227	-0.16987	0.00175	0.02735	-0.00402	0.0321	0.02703	0.0335	0.09424	-0.00262	0.06806	0.03227	0.00418	0.05718	0.00392	-0.10354	-0.00048	0.227069	m	C24-Cu2-H28-N4-O20-P4-V4	0	2	notequal_bothsteps	notequal	2	Success at all eik	This sg doesnt have any
181	QESYUJ_FSR	-1e-05	-1e-05	-3e-05	0.00782	0	-0.02996	-0.0387	-0.02987	-0.02584	0	-0.00645	0	-2e-05	-6e-05	9e-05	-0.0399	3e-05	0.02156	0.0556706	2	Br4-C32-Cu4-H40-N8	0	0	equal_bothsteps	equal	0	Success at all eik	This sg doesnt have any
182	MUSHAJ_FSR	-0.00359	0.00214	-0.07955	0	0.08814	0	0.00041	0.00035	0.00029	0.07441	0.00018	-0.03992	0.0841	0.0073	0.22484	0	0.00315	0	0.253172	m	Br2-C24-Cu2-H16-N4	0	0	equal_bothsteps	equal	0	Success at all eik	This sg doesnt have any
183	VEQZAV_FSR	0.13898	-0.20365	0.04233	0	0.00943	0	-8e-05	0.0001	-7e-05	-0.01999	-3e-05	-0.10717	0.07651	0.13434	0.02982	0	0.04493	0	0.261039	m	C36-Cl2-Cu2-H34-N4-O6	0	2	notequal_bothsteps	equal	0	Success at all eik	This sg doesnt have any
184	LOSGOR01_FSR	0	-1e-05	-1e-05	0.03928	0	-0.01175	0.06933	0.0656	-0.02559	0	0.00398	0	-1e-05	-1e-05	-1e-05	-0.03009	0	0.01854	0.0988974	2	Cu2-H12-C14-N10	0	0	equal_bothsteps	equal	0	Success at all eik	This sg doesnt have any
185	VEFTEF_FSR	-0.00013	9e-05	-0.00015	-0.09504	-0.00014	-0.22107	-0.12168	-0.02133	-0.02285	0	0.0029	0	-8e-05	3e-05	-7e-05	-0.11422	-6e-05	-0.10071	0.279176	2	Cu2-H16-C18-I2-N4	0	0	equal_bothsteps	equal	0	Success at all eik	This sg doesnt have any
186	AGOXAX_FSR	1e-05	-1e-05	-0.00016	0.02134	3e-05	0.03916	0.0399	-0.07779	-0.0442	0	0.06482	0	-0.00015	-0.00023	-0.00017	0.05906	0.00011	0.04622	0.117468	2	Cu2-H20-C24-O12	0	2	notequal_bothsteps	equal	0	Success at all eik	This sg doesnt have any
187	CUCLPY_FSR	0	1e-05	-2e-05	-0.0213	-1e-05	0.02417	-0.08626	-0.11603	-0.12998	0	0.06611	0	0	1e-05	0	-0.01565	0	-0.0083	0.205351	2	Cu2-H10-C10-N2-Cl2	0	0	equal_bothsteps	equal	0	Success at all eik	This sg doesnt have any
188	BIZHID01_FSR	-0.02256	-0.01864	-0.02124	0.00113	-0.03523	0.00045	-0.0097	-0.00817	-0.00811	-0.00492	-0.00093	0.00015	-0.02346	0.05014	0.01966	-0.00051	-0.00085	0.00127	0.0632857	mm2	C28-Cu2-H32-N12-S4	0	0	equal_bothsteps	equal	0	Failed at e36	This sg doesnt have any
189	GIFGIN_FSR	-0.03595	0.02342	0.00013	0	0.0389	0	-0.00012	-0.00012	1e-05	-0.07066	-2e-05	-0.0286	-0.01658	0.05897	-0.09471	0	0.02235	0	0.118229	m	C20-Cu2-H8-Hg2-N12-S8	0	2	notequal_bothsteps	equal	0	Success at all eik	This sg doesnt have any
190	NAVLOO_FSR	-0.04236	0.01267	0.03143	0.01172	-0.12157	0.00681	-0.00168	-0.01371	-0.01989	-0.03746	-0.00071	0.08118	0.0133	-0.05983	0.11884	-0.00682	0.03309	-0.00667	0.142987	m	C26-Cu2-H24-N4-O12-P4	0	2	notequal_bothsteps	notequal	2	Failed at e36	This sg doesnt have any
191	RITMAL_FSR	-0.18472	0.0025	-0.15199	0	0.00825	0	5e-05	-1e-05	4e-05	-0.0241	-1e-05	0.0123	-0.0196	0.01352	-0.00223	0	-0.19602	0	0.24	m	C6-Cl2-Cu2-H12-S4	0	0	equal_bothsteps	equal	0	Success at all eik	This sg doesnt have any
192	IHEPES_FSR	-0.09707	0.05129	0.04348	0	0.22581	0	0.00018	0.00026	0.0001	0.01688	-8e-05	0.02377	0.07292	-0.02956	-0.0279	0	0.05275	0	0.254978	m	C12-Cl4-Cu2-F4-H24-N4-O4	2	2	equal_bothsteps	equal	2	Success at all eik	This sg doesnt have any
193	SAWVOB_FSR	-0.02026	-0.0467	0.01765	0.01146	0.07637	-0.1265	-0.11955	-0.16108	0.01603	0.02924	0.00518	-0.03993	0.0656	0.01305	0.13347	-0.11987	-0.0042	-0.02926	0.236002	1	Cu1-H9-C13-Br1-N1	0	0	equal_bothsteps	equal	0	This sg doesnt have any	This sg doesnt have any
194	QORBAA_FSR	0	1e-05	-2e-05	0	-0.2152	0	-1e-05	8e-05	5e-05	-0.27233	0	0	-0.15395	-0.21942	-0.15111	0	0	0	0.307701	mm2	C12-Cl2-Cu2-H8-N4-S2	0	0	equal_bothsteps	equal	0	Success at all eik	This sg doesnt have any
195	SODKON_FSR	0.15277	-0.15281	8e-05	0	-0.01297	0	0.00036	-0.00028	1e-05	-0.01317	-0.00015	-0.1531	0.13445	0.13445	-0.21423	0	0	0	0.28644	3m	Cu6-H30-C12-S6-I6-N6	0	0	equal_bothsteps	equal	0	Success at all eik	Success at all eik
196	UWEGUZ_FSR	0.00015	4e-05	8e-05	0.1297	4e-05	-0.02439	-0.07996	-0.20328	-0.02619	0	0.04832	0	-0.00014	0.00031	0.00047	0.06229	0.00011	0.04097	0.225249	2	C32-Cu2-H26-N4-O12-P2-S2	0	0	equal_bothsteps	equal	0	Success at all eik	This sg doesnt have any
197	LOVTEV_FSR	-7e-05	-2e-05	0.00022	-0.01472	0.00012	-0.03082	-0.05777	0.0427	-0.02432	0	0.0454	0	-7e-05	7e-05	-0.00018	-0.06375	0.00016	-0.01079	0.0883934	2	Cu2-H6-C10-S2-Br2-N6	0	0	equal_bothsteps	equal	0	Success at all eik	This sg doesnt have any
198	EPIYOT_FSR	0.0014	-0.00049	-0.00068	0.01036	0.00103	0.00056	-0.16299	-0.10087	-0.21084	0	-0.07159	0	-0.00093	0.00045	0.00027	0.06099	-0.00071	-0.02325	0.293802	2	Cu2-H14-C24-N12-O4	0	0	equal_bothsteps	equal	0	Success at all eik	This sg doesnt have any
199	GENRUO_FSR	-5e-05	-4e-05	1e-05	0	-0.07488	0	0	-3e-05	-1e-05	-0.00424	0	0	-0.07193	0.00074	-0.10833	0	0	0	0.130038	mm2	Bi4-H40-C52-S4-O12-F12	0	0	equal_bothsteps	equal	0	Success at all eik	This sg doesnt have any
200	KEKRIE_FSR	0.00805	-0.0118	-0.0603	0	0.05775	0	-0.00016	-5e-05	-0.00017	-0.01438	5e-05	0.0569	-0.02051	-0.02101	-0.08124	0	0.00144	0	0.111295	m	C40-Ca2-H44-N8-O16	0	0	equal_bothsteps	equal	0	Success at all eik	This sg doesnt have any
201	KAWFIX_FSR	5e-05	-5e-05	-0.00013	-0.03005	0.0001	0.00779	0.00118	-0.03087	0.00234	0	-0.00618	0	8e-05	0.00017	0.00011	-0.01821	-5e-05	-0.03674	0.0420281	2	C16-Ca4-H52-N4-O32	0	0	equal_bothsteps	equal	0	Success at all eik	This sg doesnt have any
202	EDEXER_FSR	-0.0019	-0.01246	0.00027	0	-0.02019	0	0.00017	-9e-05	-8e-05	0.02071	0.00013	0.01221	-0.11138	0.04365	0.04143	0	-0.06502	0	0.142495	m	Ba2-C40-H56-O20	0	0	equal_bothsteps	equal	0	Success at all eik	This sg doesnt have any
203	NEBQES_FSR	0	-1e-05	0	0	0.05491	0	1e-05	1e-05	0	0.29213	0	0	0.09813	0.26854	0.19961	0	0	0	0.348694	mm2	Ba4-H40-C48-N16-O40	0	0	equal_bothsteps	equal	0	Success at all eik	This sg doesnt have any
204	DAXDUE_FSR	-0.00355	-0.0512	0.12635	0	0.03871	0	-1e-05	-2e-05	0	0.02277	-1e-05	-0.12719	-0.00105	-0.03968	0.0604	0	0.02542	0	0.160597	m	Ca4-H36-C44-N12-O20	0	0	equal_bothsteps	equal	0	Success at all eik	This sg doesnt have any
205	YUKBIP_FSR	-0.03777	0.03785	4e-05	0	-0.08613	0	0	0	-1e-05	-0.08614	0	0.03786	-0.01383	-0.01383	-0.24865	0	0	0	0.249418	3m	Al8-P12-H36-C12-O36	0	0	equal_bothsteps	equal	0	Success at all eik	Success at all eik
206	LAHWOI_FSR	-1e-05	-1e-05	0	-0.02181	-1e-05	0.01051	-0.03662	0.06933	0.04809	0	-0.01245	0	-1e-05	1e-05	-2e-05	0.03221	-2e-05	-0.00889	0.0928188	2	Bi2-H54-C48-S4-O12	0	0	equal_bothsteps	equal	0	Success at all eik	This sg doesnt have any
207	GETRED01_FSR	0	0	-1e-05	0	0.04814	0	-3e-05	-3e-05	-1e-05	0.00662	0	0	-0.18938	-0.07485	-0.09914	0	0	0	0.226486	mm2	Bi4-H36-C40-Cl8-O16	0	0	equal_bothsteps	equal	0	Success at all eik	This sg doesnt have any
208	ABIVOY_FSR	7e-05	-2e-05	-6e-05	0	-0.10147	0	0	0	1e-05	-0.07495	0	0	-0.14649	-0.14889	-0.20848	0	0	0	0.295113	mm2	Ba4-H48-C32-S4-O44	0	0	equal_bothsteps	equal	0	Success at all eik	This sg doesnt have any
209	RIVBOO_FSR	2e-05	1e-05	2e-05	0	0.06001	0	0	-1e-05	0	-0.01779	0	0	-0.0308	0.02896	-0.06993	0	0	0	0.0817161	mm2	C60-Cd2-F12-H40-N4-O8	0	0	equal_bothsteps	equal	0	Success at all eik	This sg doesnt have any
210	FOHCIP_FSR	0	4e-05	0	0	-0.00212	0	2e-05	-1e-05	-3e-05	-0.00643	0	0	-0.07724	-0.20803	0.08108	0	0	0	0.236255	mm2	Cd4-Hg4-H40-C32-S16-N24-O8	0	0	equal_bothsteps	equal	0	Success at all eik	This sg doesnt have any
211	ECOXAX_FSR	-6e-05	4e-05	-0.00018	0.01823	-0.0001	-0.02337	0.06548	0.04275	0.09845	0	0.07407	0	0.00019	-0.00014	0.00044	-0.00695	0.00024	-0.00562	0.145925	2	Na2-Cr2-H54-C30-N2-O12	2	2	equal_bothsteps	equal	2	Success at all eik	This sg doesnt have any
212	NEVGIE_FSR	-2e-05	1e-05	-4e-05	0	-0.11911	0	8e-05	5e-05	0.00021	-0.07376	0	0	0.01198	0.02404	0.22896	0	0	0	0.23053	mm2	Cs12-H60-C72-O12	0	0	equal_bothsteps	equal	0	Success at all eik	This sg doesnt have any
213	QUVHIZ_FSR	0	0	1e-05	-0.05619	3e-05	-0.02587	-0.01289	-0.00421	0.00445	0	-0.0626	0	3e-05	-3e-05	-5e-05	0.02239	4e-05	-0.05645	0.0642068	2	Sr2-Co4-H32-C24-N8-O32	0	0	equal_bothsteps	equal	0	Success at all eik	This sg doesnt have any
214	IXAJIB_FSR	-3e-05	-1e-05	-5e-05	-0.00697	0	0.05748	0.04167	0.05122	-0.02588	0	-0.00353	0	3e-05	1e-05	1e-05	0.00507	-4e-05	-0.02748	0.0710078	2	C66-Cr4-H48-N4-O20-Zn2	0	0	equal_bothsteps	equal	0	Success at all eik	This sg doesnt have any
215	DOCQOC_FSR	0.03533	-0.06127	0.03841	-0.00164	-0.09517	0.00046	0.00128	0.00189	-0.00014	0.01035	0.00252	-0.02233	-0.03887	0.01277	-0.08805	0.00337	-0.00654	-0.00204	0.135259	m	C42-Cd2-Ce2-H34-N6-O32	0	0	equal_bothsteps	equal	0	Failed at e36	This sg doesnt have any
216	QAHKUH_FSR	0	0	-1e-05	0	-0.02552	0	-1e-05	-1e-05	-1e-05	0.00379	0	0	-0.02645	-0.00884	-0.03484	0	0	0	0.0446271	mm2	C56-Cd2-Cl12-H40-N8-O8	0	0	equal_bothsteps	equal	0	Success at all eik	This sg doesnt have any
217	LALXON_FSR	0.03252	0.0324	0.02294	-0.06017	0.05118	-0.03709	-0.02236	-0.0697	0.00151	-0.03147	-0.03353	-0.01401	0.01381	-0.02021	-0.01129	-0.03087	0.01785	-0.00722	0.108641	2	Co4-H56-C40-O16	4	2	notequal_bothsteps	notequal	6	Failed at e35	This sg doesnt have any
218	LAPJAQ_FSR	-0.00079	-0.00108	0.00045	0.04893	4e-05	0.04978	-0.01777	0.00204	-0.06093	0	0.08742	0	0.00025	-4e-05	-0.00029	-0.01217	1e-05	0.02993	0.108049	2	Cd2-H44-C36-S2-N12-O18	0	0	equal_bothsteps	equal	0	Success at all eik	This sg doesnt have any
219	EKUFUN_FSR	-1e-05	-1e-05	0	-0.02956	0	0.04344	-0.00049	-0.06584	-0.02322	0	0.01822	0	2e-05	1e-05	-1e-05	0.0438	0	-0.0126	0.0721546	2	Co2-H48-C44-S2-N8-O14	2	2	equal_bothsteps	equal	2	Success at all eik	This sg doesnt have any
220	LOFDOC_FSR	2e-05	0	2e-05	0	0.0028	0	-1e-05	-1e-05	-6e-05	0.00014	0	0	0.01884	0.00789	-0.00908	0	0	0	0.0223527	mm2	Cs8-H16-C16-N48-O16	0	0	equal_bothsteps	equal	0	Success at all eik	This sg doesnt have any
221	QEKYOX_FSR	0	0	0	0.03582	0	0.01097	-0.023	0.00099	-0.01213	0	0.01539	0	1e-05	1e-05	-1e-05	0.00481	1e-05	0.00883	0.0381687	2	Cd2-H48-C40-S4-N16	0	0	equal_bothsteps	equal	0	Success at all eik	This sg doesnt have any
222	KAZQAG_FSR	-0.11397	0.07883	-0.00075	0	0.06927	0	1e-05	2e-05	1e-05	0.04251	0	0.01374	-0.00194	0.02974	-0.04406	0	-0.01042	0	0.155461	m	C48-Co2-H44-K2-N4-O6	0	0	equal_bothsteps	equal	0	Success at all eik	This sg doesnt have any
223	RAPVAF02_FSR	1e-05	0	0	0	-0.0022	0	-1e-05	0	-3e-05	-0.00558	0	0	0.01384	0.00219	0.01707	0	0	0	0.0220846	mm2	C30-Cd2-H48-K2-N6-O12-S6	0	0	equal_bothsteps	equal	0	Success at all eik	This sg doesnt have any
224	QEBGEM_FSR	-1e-05	0	-1e-05	0	-0.14382	0	-0.00012	0.00093	4e-05	-0.16325	0	0	-0.04984	-0.26267	-0.14324	0	0	0	0.303312	mm2	C48-Cd2-H48-N8-O12	0	0	equal_bothsteps	equal	0	Success at all eik	This sg doesnt have any
225	GIKQEY_FSR	0.00019	7e-05	5e-05	-0.02862	-0.00014	-0.05163	-0.01145	0.09821	-0.01545	0	0.01499	0	1e-05	6e-05	0.00014	0.02084	4e-05	0.03174	0.101191	2	Cd2-H52-C44-N12-O8	0	0	equal_bothsteps	equal	0	Success at all eik	This sg doesnt have any
226	IVEFOG_FSR	0.00513	-0.13194	-0.12421	0	-0.0606	0	-0.00061	-0.00247	-0.00334	-0.01194	-0.00123	0.01246	-0.02444	-0.05104	0.03802	0	-0.03929	0	0.192722	m	C40-H68-K2-N2-O2	0	0	equal_bothsteps	equal	0	Success at all eik	This sg doesnt have any
227	ONIHUQ_FSR	7e-05	1e-05	-1e-05	0	0.18839	0	3e-05	-0.00013	3e-05	-0.08213	0	0	0.01527	-0.10114	-0.01313	0	0	0	0.18839	mm2	Hg4-H44-C64-I8-Br4-N8	0	0	equal_bothsteps	equal	0	Success at all eik	This sg doesnt have any
228	GIRQAB_FSR	6e-05	-7e-05	-0.0001	0	-1.01327	0	6e-05	-2e-05	-0.00012	-0.04255	0	0	0.08845	-0.14683	0.20854	0	0	0	1.01327	mm2	C40-H32-Hg8-I16-N8-S4	0	0	equal_bothsteps	equal	0	Success at all eik	This sg doesnt have any
229	FEYDAP_FSR	-6e-05	1e-05	-1e-05	0	-0.1259	0	2e-05	-1e-05	3e-05	0.02229	0	0	-0.07535	0.08096	0.03129	0	0	0	0.1259	mm2	Hg8-H48-C48-S4-N8-Cl16	0	0	equal_bothsteps	equal	0	Success at all eik	This sg doesnt have any
230	GAMTUM_FSR	3e-05	1e-05	3e-05	-0.03107	3e-05	-0.00666	-0.00314	0.01093	0.01704	0	-0.01132	0	2e-05	2e-05	0	0.0219	1e-05	-0.00578	0.0380744	2	In4-H68-C60-S8	0	0	equal_bothsteps	equal	0	Success at all eik	This sg doesnt have any
231	DOKPAV_FSR	0.04945	0.14017	-0.04086	0	-0.11744	0	2e-05	0	0	-0.00935	0	0.12973	-0.22697	-0.0381	0.13585	0	-0.04032	0	0.283091	m	C42-H42-K2-O28	0	0	equal_bothsteps	equal	0	Success at all eik	This sg doesnt have any
232	IXIPIQ_FSR	0	4e-05	-3e-05	0	0.02878	0	0	4e-05	2e-05	-0.13667	0	0	0.06249	-0.04815	0.04164	0	0	0	0.13667	mm2	Hg4-H36-C48-Br8-N12	0	0	equal_bothsteps	equal	0	Success at all eik	This sg doesnt have any
233	BAXPOG_FSR	-0.00125	-0.00021	0.00114	0.02172	-0.00105	-0.01182	0.0891	0.10032	-0.06542	0	0.01409	0	0.0003	0.0002	-0.00068	-0.04637	0.00098	0.01147	0.149947	2	Br4-C54-H36-Hg2-N4-O2	0	0	equal_bothsteps	equal	0	Success at all eik	This sg doesnt have any
234	GAWHAP_FSR	-1e-05	0	0	0.00011	0	0.00804	-0.01378	-0.02318	0.08055	0	-0.04031	0	2e-05	2e-05	3e-05	0.10004	1e-05	0.02515	0.103174	2	K2-H60-C38-N6-O18	0	0	equal_bothsteps	equal	0	Success at all eik	This sg doesnt have any
235	HOYMEP_FSR	-0.00011	-0.00018	0.00014	0	-0.04414	0	-0.00044	-0.00065	-2e-05	0.02042	0	0	0.21776	0.35403	0.05996	0	0	0	0.419943	mm2	C48-F4-H36-Hg4-I8-N8	0	0	equal_bothsteps	equal	0	Success at all eik	This sg doesnt have any
236	HOYMOZ_FSR	-1e-05	-1e-05	-1e-05	0	-0.12478	0	2e-05	-5e-05	1e-05	0.0711	0	0	0.03753	-0.00573	-0.01049	0	0	0	0.12478	mm2	Hg4-H36-C48-I8-Br4-N8	0	0	equal_bothsteps	equal	0	Success at all eik	This sg doesnt have any
237	VINWOH_FSR	1e-05	-3e-05	5e-05	0	0.05773	0	-7e-05	-6e-05	-3e-05	-0.11134	0	0	-0.03223	0.02947	-0.03288	0	0	0	0.11134	mm2	K4-H84-C96-S8-O36	0	0	equal_bothsteps	equal	0	Success at all eik	This sg doesnt have any
238	ONINOQ_FSR	0	3e-05	-1e-05	0	-0.18529	0	0	0	0	0.08283	0	0	-0.01667	0.10065	0.00873	0	0	0	0.18529	mm2	Hg4-H44-C64-I8-N8-Cl4	0	0	equal_bothsteps	equal	0	Success at all eik	This sg doesnt have any
239	PEXWAQ01_FSR	0.0008	0.00136	0.00061	-0.00076	0.08664	0.01699	0.01812	-0.01677	0.00034	0.08776	0	0	-0.02445	-0.02445	-0.15597	0	0	0	0.159762	3m	C54-H42-La2-O12	0	0	equal_bothsteps	equal	0	Success at all eik	Success at all eik
240	RATVEP_FSR	0.00015	-4e-05	-0.00074	0	-0.0866	0	0	0	1e-05	-0.11534	0	0	-0.04248	0.02455	-0.10769	0	0	0	0.118344	mm2	Mg4-H28-C40-N12-O20	0	0	equal_bothsteps	equal	0	Success at all eik	This sg doesnt have any
241	XUNSAC_FSR	2e-05	6e-05	0	0.00089	-1e-05	-0.00057	-2e-05	0.00673	-0.00123	0	-0.00133	0	1e-05	1e-05	1e-05	0.00039	-1e-05	0.00026	0.00696985	2	Li8-H32-C48-N8-O16	0	0	equal_bothsteps	equal	0	Success at all eik	This sg doesnt have any
242	CAGKON_FSR	1e-05	0	0	0.01521	-1e-05	0.02077	0.01625	-0.01088	-0.011	0	0.00508	0	0	2e-05	-5e-05	-0.03739	1e-05	0.03408	0.0506914	2	Na2-P4-H76-C46-N2-O12	0	0	equal_bothsteps	equal	0	Success at all eik	This sg doesnt have any
243	MOZCEL_FSR	0.00936	-0.04134	0.04971	-0.03252	-0.00823	-0.0082	0.00775	0.00044	-0.00121	-0.03822	-0.00091	-0.0551	-0.02948	0.02987	-0.09619	0.00961	-0.02296	0.0138	0.127369	m	C50-H40-N4-Ni2-O14	0	0	equal_bothsteps	equal	0	Failed at e36	This sg doesnt have any
244	JEJZAC_FSR	6e-05	-1e-05	3e-05	0	0.05295	0	1e-05	3e-05	-3e-05	0.01086	0	0	0.04596	-0.06231	-0.07955	0	0	0	0.111009	mm2	Mn4-H64-C92-O32	20	20	equal_bothsteps	equal	20	Success at all eik	This sg doesnt have any
245	QIJNUU_FSR	-0.01562	-0.03653	-0.00659	-0.00789	-0.06579	0.01982	0.02407	-0.0082	0.06336	0.04798	-0.01071	-0.00471	-0.02178	0.04977	0.00146	0.05448	0.02361	-0.01123	0.103403	1	Na4-H40-C32-S2-O24	0	0	equal_bothsteps	equal	0	This sg doesnt have any	This sg doesnt have any
246	ODOWAF_FSR	0.01694	0.06085	-0.09073	0	0.0234	0	-1e-05	-1e-05	-2e-05	-0.05744	-1e-05	-0.01197	-0.00434	0.00598	0.0095	0	-0.02941	0	0.11359	m	B2-C44-H48-Li2-O16	0	0	equal_bothsteps	equal	0	Success at all eik	This sg doesnt have any
247	RIWFUA_FSR	0	0	0	0.01307	0	-0.0038	0.06615	0.01452	-0.0402	0	0.02312	0	0	0	0	-0.03859	0	-0.00845	0.0820806	2	Mn2-H60-C52-N4-Cl4-O4	0	10	notequal_bothsteps	equal	0	Success at all eik	This sg doesnt have any
248	HAYQIK_FSR	0.02202	0.03683	0.0009	0	-0.14907	0	2e-05	1e-05	1e-05	0.00671	2e-05	0.05351	-0.10233	-0.0298	-0.18617	0	0.09198	0	0.249505	m	C48-H60-La2-N6-O26	0	0	equal_bothsteps	equal	0	Success at all eik	This sg doesnt have any
249	EYUKOZ_FSR	-0.00415	-0.0024	-0.00066	-0.00013	-0.03708	-0.00051	0.00334	0.00362	0.00153	-0.03645	0.00141	0.00053	-0.0765	-0.07651	-0.04475	0.00033	0.00062	0.00012	0.117305	4	Mn8-P8-H40-C20-N4-O48	10	40	notequal_bothsteps	equal	10	Success at all eik	Success at all eik
250	IJOMOJ03_FSR	0.00203	0.00049	0.00023	-0.00051	-0.00957	-0.00043	0.00329	0.00426	0.00218	-0.01426	-0.00017	0.00014	-0.0529	0.01726	0.0357	0.00017	0.0001	0.00076	0.0661329	mm2	Mn12-H24-C24-O48	30	60	notequal_bothsteps	equal	30	Success at all eik	This sg doesnt have any
251	ADODII_FSR	-0.00013	-0.00021	-4e-05	0.0623	-0.00032	0.07111	-0.09273	-0.10494	-0.03294	0	0.04155	0	-8e-05	-6e-05	-2e-05	-0.00163	2e-05	0.05062	0.149742	2	C52-H40-La2-O19	0	0	equal_bothsteps	equal	0	Success at all eik	This sg doesnt have any
252	YUMCER_FSR	-0.0001	-7e-05	0	0	-0.06853	0	4e-05	7e-05	3e-05	-0.05664	0	0	0.00342	-0.11296	0.13047	0	0	0	0.17261	mm2	H36-Pb4-C60-N4-O24	0	0	equal_bothsteps	equal	0	Success at all eik	This sg doesnt have any
253	OXUSOQ_FSR	0.00081	0.00077	0.00062	0	0.00012	0	-1e-05	-1e-05	-1e-05	0.00162	0	0.00019	5e-05	-0.00341	-0.00204	0	0.00022	0	0.00409944	mm2	Zn4-Mo4-H36-C48-N20-O16	0	0	equal_bothsteps	equal	0	Success at all eik	This sg doesnt have any
254	NEZQER_FSR	-0.12758	0.12785	9e-05	0.01863	0.01856	0.05963	0.05906	-0.05956	-8e-05	0.0185	-0.01869	0.12792	0.03629	0.03629	-0.03289	0	0	0	0.200876	3	Li6-H42-C39-O15	0	0	equal_bothsteps	equal	0	Success at all eik	Success at all eik
255	XEQLEM_FSR	0	-1e-05	0	-0.00022	0	-0.00666	-0.02758	-0.02806	-0.01093	0	-0.00057	0	2e-05	2e-05	2e-05	-0.00252	0	0.00483	0.0408388	2	Mg4-H32-C48-N8-O16	0	0	equal_bothsteps	equal	0	Success at all eik	This sg doesnt have any
256	PUPXII01_FSR	-8e-05	4e-05	4e-05	0	-0.10957	0	1e-05	0	-1e-05	-0.12948	0	0	-0.17459	0.04226	-0.19632	0	0	0	0.2661	mm2	Mn4-H28-C40-N12-O20	20	20	equal_bothsteps	equal	20	Success at all eik	This sg doesnt have any
257	KOJCUI_FSR	9e-05	4e-05	-1e-05	1e-05	0.18321	0.00163	0.00713	0.00953	0.00316	-0.14148	0	0	0.16083	-0.10684	0.01114	-0.00128	0	0	0.193426	mm2	C56-H28-Mn4-N12-O32	20	20	equal_bothsteps	equal	20	Success at all eik	This sg doesnt have any
258	PIHWAG_FSR	0.14058	0.04205	0.13539	0	-0.08896	0	7e-05	0.00029	0.00018	0.1225	-1e-05	-0.06307	-0.02567	0.09763	0.00179	0	0.10264	0	0.223981	m	C48-H32-La2-N2-O14-S6	0	0	equal_bothsteps	equal	0	Success at all eik	This sg doesnt have any
259	FELXAV_FSR	3e-05	3e-05	5e-05	0.02856	-2e-05	-0.00873	0.01738	0.00874	0.02289	0	-0.02705	0	0.00021	0.0001	0.00022	0.0094	-9e-05	-0.01153	0.0404259	2	Mo4-H60-C60-N4-O16	0	0	equal_bothsteps	equal	0	Success at all eik	This sg doesnt have any
260	QAYBOK_FSR	0.00089	-0.00718	-0.03086	0.00061	-0.02347	0.00019	-0.00074	-0.00203	-0.00157	0.01701	-0.00051	-0.02845	-0.06142	0.07146	-0.01292	-0.00168	0.01294	0.00042	0.0961645	m	C64-H44-Mn2-N8-O12-S2	10	10	equal_bothsteps	equal	10	Success at all eik	This sg doesnt have any
261	FIDWIY_FSR	0.06249	0.00662	-0.01108	0	-0.00148	0	0	0	0	0.01052	0	-0.01442	-0.01595	-0.02173	-0.00709	0	0.02162	0	0.0666891	m	C48-H48-Li4-N4-S4	0	0	equal_bothsteps	equal	0	Success at all eik	This sg doesnt have any
262	DEMMIS_FSR	2e-05	1e-05	2e-05	0	-0.01864	0	0	2e-05	0	-0.0659	0	0	-0.10123	-0.06551	0.09126	0	0	0	0.15122	mm2	Na4-H32-C40-N8-Cl4-O16	0	0	equal_bothsteps	equal	0	Success at all eik	This sg doesnt have any
263	LOTTEW01_FSR	-0.02689	0.02703	0.00027	0.03017	-0.01286	0.09961	0.09927	-0.10045	0.00017	-0.01279	-0.03011	0.02695	0.00928	0.00928	-0.04488	0	0	0	0.149894	3	Mg9-H36-C63-O45	0	0	equal_bothsteps	equal	0	Success at all eik	Success at all eik
264	ALIGOS_FSR	5e-05	0	4e-05	0	-0.06648	0	0	1e-05	0	0.03615	0	0	0.044	0.05317	0.06774	0	0	0	0.0967045	mm2	Li4-H52-C68-N16	0	0	equal_bothsteps	equal	0	Success at all eik	This sg doesnt have any
265	OVUNID_FSR	-0.02095	0.0204	-0.00012	-0.00383	-0.00607	-0.0029	-0.00325	0.0033	0.00013	-0.00635	0.00403	0.02048	0.00458	0.00458	-0.19727	0	0	0	0.197376	3	Li3-H39-C42-N18	0	0	equal_bothsteps	equal	0	Success at all eik	Success at all eik
266	EXABEL_FSR	-0.00011	-7e-05	0	0.07647	-8e-05	-0.00044	0.0326	0.00857	0.0287	0	0.01328	0	0	1e-05	0	0.0423	0	0.00841	0.087468	2	Li2-H48-C46-N8-O2-F18	0	0	equal_bothsteps	equal	0	Success at all eik	This sg doesnt have any
267	MILBEO_FSR	-0.00181	-0.00189	-0.00141	0.00024	0.11772	-0.01989	-0.02098	0.01882	-0.00089	0.11744	0	0	-0.01064	-0.01064	-0.11946	0	0	0	0.121378	3m	C48-H54-O6-Tl6	0	0	equal_bothsteps	equal	0	Success at all eik	Success at all eik
268	PORBUU_FSR	0	0	0	0.06419	0	0.01202	-0.02108	0.0081	-0.0598	0	0.1767	0	-1e-05	1e-05	0	0.01675	0	0.19387	0.195468	2	Zn4-Sn4-H64-C24-Se14-N12	0	0	equal_bothsteps	equal	0	Success at all eik	This sg doesnt have any
269	EJODIS_FSR	0.02167	0.01172	0.00782	0	-0.01065	0	0.00017	0.00013	7e-05	0.02611	-2e-05	0.00283	0.03124	0.014	0.04385	0	0.00991	0	0.060041	m	C72-H44-N16-O12-Rb4	0	0	equal_bothsteps	equal	0	Success at all eik	This sg doesnt have any
270	OQETEK_FSR	5e-05	-5e-05	0	0.00521	-0.00859	0	-9e-05	6e-05	0	-0.0086	-0.0052	-1e-05	-0.01815	-0.01815	-0.02055	0	0	0	0.0328808	4	Yb4-H36-C60-O28	0	0	equal_bothsteps	equal	0	Success at all eik	Success at all eik
271	BOXZAQ_FSR	-1e-05	0	0	0	0.00961	0	-1e-05	-1e-05	1e-05	0.03509	0	0	-0.02719	0.00421	-0.0404	0	0	0	0.0488792	mm2	H52-Pd4-C52-S4-Br8-N4	0	0	equal_bothsteps	equal	0	Success at all eik	This sg doesnt have any
272	LIBHUB_FSR	0	0	0	0	0.00227	0	0	2e-05	0	-0.01839	0	0	-0.02619	-0.02411	0.01427	0	0	0	0.0383515	mm2	Sr4-H56-C48-O20	0	0	equal_bothsteps	equal	0	Success at all eik	This sg doesnt have any
273	ROFNAB_FSR	0.22128	0.04382	-0.02275	-0.00403	0.0023	0.00906	0.01615	-0.00702	-0.00423	0.00462	0.00581	0.01392	-0.00232	0.00131	0.00178	0.00014	-0.00967	0.01567	0.227477	1	V2-H44-C56-N4-O6	0	2	notequal_bothsteps	notequal	2	This sg doesnt have any	This sg doesnt have any
274	CISJIY01_FSR	0	0	0	0.01082	0	0.02985	0.02398	-0.09564	0.02271	0	-0.00733	0	0	0	1e-05	0.00187	0	-0.00816	0.101447	2	Y2-H42-C54-O12	0	0	equal_bothsteps	equal	0	Success at all eik	This sg doesnt have any
275	JIPYOZ_FSR	-1e-05	0	1e-05	-0.03646	0	-0.03606	0.07372	-0.02077	-0.02135	0	-0.02644	0	0	0	0	0.00317	0	-0.01806	0.083791	2	Sn4-P2-H64-C30-N2-O8	0	0	equal_bothsteps	equal	0	Success at all eik	This sg doesnt have any
276	LUPZUS_FSR	0	0	1e-05	0.00948	1e-05	0.02465	0.02051	-0.08474	0.01706	0	-0.009	0	0	1e-05	1e-05	0.00697	1e-05	-0.00371	0.0892949	2	Yb2-H42-C54-O12	0	0	equal_bothsteps	equal	0	Success at all eik	This sg doesnt have any
277	GOTJAA_FSR	0	0	0	-0.00262	1e-05	0.03561	0.12047	-0.07985	-0.0038	0	0.01093	0	1e-05	-2e-05	-1e-05	-0.00484	0	0.02478	0.144993	2	Rb4-H40-C56-S8-N4-O32	0	0	equal_bothsteps	equal	0	Success at all eik	This sg doesnt have any
278	BUBSOI_FSR	0	1e-05	0	-0.03269	0	0.03913	0.07071	0.06687	-0.05391	0	-0.01723	0	1e-05	2e-05	-1e-05	0.005	0	-0.02025	0.112582	2	Sn2-H52-C54-S2-N4-O8	0	0	equal_bothsteps	equal	0	Success at all eik	This sg doesnt have any
279	REDMUL_FSR	0.01583	0.00964	0.00244	0	0.01959	0	-8e-05	-3e-05	-6e-05	-0.02129	-4e-05	-0.00285	0.02995	-0.02425	-0.04798	0	0.00914	0	0.0624464	m	C78-H48-O12-P2-Y2	0	0	equal_bothsteps	equal	0	Success at all eik	This sg doesnt have any
280	KAVYEN_FSR	0.17344	-0.03877	0.09044	0	0.08691	0	7e-05	9e-05	4e-05	-0.04289	-6e-05	-0.10185	0.1458	-0.06476	0.04371	0	0.07258	0	0.280598	m	C40-H56-N16-O24-V8-Zn4	0	0	equal_bothsteps	equal	0	Success at all eik	This sg doesnt have any
281	MEVDID_FSR	0.00314	-0.03407	-0.02992	0	-0.00644	0	3e-05	2e-05	1e-05	0.01781	-1e-05	0.00644	-0.00154	0.03355	-0.03499	0	-0.05479	0	0.0733051	m	C44-H56-O6-Sn2	0	0	equal_bothsteps	equal	0	Success at all eik	This sg doesnt have any
282	XEJVOZ_FSR	-0.00108	0.00023	-0.00025	3e-05	0.03998	0.01695	0.01918	-0.01769	0.00045	0.03939	0	0	0.01896	0.01896	-0.18979	0	0	0	0.191675	3m	C60-H24-N24-O48-Sr12	0	0	equal_bothsteps	equal	0	Success at all eik	Success at all eik
283	DEPHUC01_FSR	-3e-05	-0.0001	1e-05	0	0.20899	0	1e-05	-1e-05	0	0.00847	0	0	0.194	0.11189	0.12603	0	0	0	0.25698	mm2	Y4-H44-C32-S4-O44	0	0	equal_bothsteps	equal	0	Success at all eik	This sg doesnt have any
284	GAXQAZ_FSR	0.50575	-0.02755	0.38185	0	0.37009	0	-6e-05	1e-05	-4e-05	0.04499	-3e-05	0.04024	-0.53798	0.07624	-0.36312	0	-0.4267	0	1.07055	m	C40-H44-N8-O8-Zn2	0	0	equal_bothsteps	equal	0	Success at all eik	This sg doesnt have any
285	LIQBAP_FSR	0.00034	-0.0001	-0.00035	0.00034	-0.001	0.00705	0.02532	0.09028	-0.01046	0	0.0403	0	-0.00011	-6e-05	-2e-05	-0.04006	0.00012	-0.0012	0.102592	2	C40-Cl2-H50-N4-O12-S2-Zn2	0	0	equal_bothsteps	equal	0	Success at all eik	This sg doesnt have any
286	TAXHUX_FSR	0.00012	5e-05	5e-05	0.00097	3e-05	0.00028	0.00333	0.00756	0.00626	0	0.00076	0	7e-05	-3e-05	-2e-05	0.00121	1e-05	2e-05	0.0103932	2	C20-H56-N8-O16-P4-Zn6	0	0	equal_bothsteps	equal	0	Success at all eik	This sg doesnt have any
287	PACGAE_FSR	0.04964	0.01046	-0.05365	0	-0.05121	0	-0.00018	0.0001	7e-05	0.15462	3e-05	-0.0004	-0.07338	0.12198	-0.03931	0	-0.04197	0	0.154632	m	C42-F12-H28-N12-O10-Zn4	0	0	equal_bothsteps	equal	0	Success at all eik	This sg doesnt have any
288	CUGROM_FSR	5e-05	-0.00011	-2e-05	-0.07862	0	0	2e-05	4e-05	-1e-05	0	0.12618	0	0	0	0	0	0	-0.1889	0.1889	222	C8-Ca2-H8-O12	0	0	equal_bothsteps	equal	0	Success at all eik	This sg doesnt have any
289	UWIGOX_FSR	-0.03227	-0.09598	-0.04533	0	-0.00427	0	0	0	0	-0.05815	0	-0.00192	0.03054	-0.07226	-0.01585	0	0.0268	0	0.129524	m	Ba2-H32-C28-N8-O18	0	0	equal_bothsteps	equal	0	Success at all eik	This sg doesnt have any
290	XEJSUC_FSR	0.00058	-0.00033	0.00012	-0.0142	0.12654	-0.00011	0.0006	-0.0005	-2e-05	-0.12671	-0.01411	-0.00022	0.08378	-0.084	0.0001	0	0	-0.00484	0.127537	-4	Al1-C28-H16-Li1-N4-O4	0	0	equal_bothsteps	equal	0	Success at all eik	Success at all eik
291	CATART03_FSR	8e-05	0.00011	-7e-05	0.00032	0	0	7e-05	-0.00016	-0.00016	0	-0.00223	0	0	-4e-05	0.00014	0	0	-0.00275	0.00275387	222	Ca4-H32-C16-O32	0	0	equal_bothsteps	equal	0	Success at all eik	This sg doesnt have any
292	WOCQIQ_FSR	-3e-05	0.00015	5e-05	0.02635	0	0	0	0	0	0	0.06583	0	0	0	1e-05	0	0	0.05076	0.06583	222	Ca4-H44-C20-N4-Cl8-O12	0	0	equal_bothsteps	equal	0	Success at all eik	This sg doesnt have any
293	DOQMAX_FSR	2e-05	3e-05	1e-05	-0.00837	0	0	0	0	1e-05	0	0.01428	0	1e-05	0	1e-05	0	0	0.00593	0.01428	222	C48-Ca2-H60-O26	0	0	equal_bothsteps	equal	0	Success at all eik	This sg doesnt have any
294	HIXZOD_FSR	0.00016	0.00019	5e-05	0.06686	0	0	4e-05	0.00017	-6e-05	0	-0.11021	0	-6e-05	-6e-05	-1e-05	0	0	-0.05601	0.11021	222	Ba4-H16-C16-O24	0	0	equal_bothsteps	equal	0	Success at all eik	This sg doesnt have any
295	YIZVEJ_FSR	0.00016	0.00057	2e-05	-0.04659	2e-05	-0.08851	0.01348	-0.05839	0.03452	0	-0.00975	0	0	0.00018	-3e-05	0.08272	-2e-05	-0.07052	0.116035	2	Bi2-H24-C36-N6-O12	0	0	equal_bothsteps	equal	0	Success at all eik	This sg doesnt have any
296	FUSPIS10_FSR	7e-05	0.00025	-0.0002	-0.11006	0	0	-1e-05	1e-05	-1e-05	0	-0.044	0	2e-05	0	1e-05	0	0	0.00852	0.11006	222	Ca4-H64-C40-O28	0	0	equal_bothsteps	equal	0	Success at all eik	This sg doesnt have any
297	EGISEU_FSR	-0.16457	0.02972	-0.10522	0	0.21145	0	0.00011	0.00034	-4e-05	-0.05106	-8e-05	0.00954	0.06774	-0.04369	-0.02335	0	-0.06605	0	0.3016	m	C12-Ca2-H18-N18-O12	0	0	equal_bothsteps	equal	0	Success at all eik	This sg doesnt have any
298	DOFWUR_FSR	0.00683	0.00136	-0.00074	0	0.00267	0	-0.00056	0.00021	-0.00077	-0.03111	0	0	0.06082	-0.01822	-0.00714	0	0	0	0.0641944	mm2	Ba2-C20-H24-N12-O32	0	0	equal_bothsteps	equal	0	Success at all eik	This sg doesnt have any
299	INEYEG_FSR	-2e-05	-1e-05	0	0.02723	0	-0.02437	-0.01114	0.0085	-0.06862	0	0.01617	0	0	1e-05	1e-05	-0.02053	0	-0.0165	0.0718785	2	Ca2-H32-C32-Cl4-O12	0	0	equal_bothsteps	equal	0	Success at all eik	This sg doesnt have any
300	CEYPUT01_FSR	0.031	-0.03113	-0.01553	0	0.0104	0	-5e-05	-2e-05	-1e-05	0.08309	-2e-05	0.04541	0.00054	-0.05209	0.02701	0	-0.01028	0	0.0946891	m	Co2-H16-C24-N4-O8	6	6	equal_bothsteps	equal	6	Success at all eik	This sg doesnt have any
301	CAFUMT01_FSR	5e-05	-0.00032	-2e-05	0	0.05311	0	-4e-05	4e-05	3e-05	0.00302	0	0	-0.12151	0.08121	-0.02768	0	0	0	0.148748	mm2	Ca4-H32-C16-O28	0	0	equal_bothsteps	equal	0	Success at all eik	This sg doesnt have any
302	NIRPIQ_FSR	2e-05	2e-05	3e-05	-0.05147	0	0	-5e-05	0	-1e-05	0	0.05147	0	3e-05	3e-05	3e-05	0	0	0	0.05147	422	Al4-C32-H16-O20	0	0	equal_bothsteps	equal	0	Success at all eik	Success at all eik
303	TANVUZ_FSR	-0.00015	-0.00012	9e-05	0	0.06813	0	5e-05	-0.00018	-3e-05	-0.06669	0	0	0.07295	-0.06461	0.00714	0	0	0	0.0977097	mm2	C20-Ca2-Cl4-H20-N4	0	0	equal_bothsteps	equal	0	Success at all eik	This sg doesnt have any
304	HESKEY_FSR	0.0001	-8e-05	-5e-05	0	0.02925	0	0	-1e-05	0	0.01527	0	0	0.1521	-0.07896	0.04136	0	0	0	0.176295	mm2	C18-Ca2-H32-O24	0	0	equal_bothsteps	equal	0	Success at all eik	This sg doesnt have any
305	KEKREA_FSR	0	1e-05	-1e-05	-0.02551	-2e-05	0.04039	0.1243	0.04393	0.07805	0	-0.03368	0	0	0	-1e-05	0.06808	0	-0.01804	0.156865	2	Ca2-H24-C28-N4-O16	0	0	equal_bothsteps	equal	0	Success at all eik	This sg doesnt have any
306	IXOJOW_FSR	-1e-05	-1e-05	-1e-05	0.08472	0	0.08105	-0.04525	-0.25495	-0.17966	0	-0.0344	0	-1e-05	0	0	-0.01519	0	-0.03401	0.31703	2	Co2-H18-C12-N6-O12	6	6	equal_bothsteps	equal	6	Success at all eik	This sg doesnt have any
307	GOJFIW_FSR	0.0018	0.00243	-0.00199	0.01399	0	0	0	-2e-05	1e-05	-1e-05	-0.06851	-0.00018	1e-05	-1e-05	0	1e-05	0.00172	0.049	0.0685612	222	Ba2-Br4-C14-H36-O16	0	0	equal_bothsteps	equal	0	Failed at e35	This sg doesnt have any
308	ROJBID_FSR	2e-05	0	2e-05	0.00292	0.00011	-0.03938	-0.04904	-0.0475	-0.00296	0	-0.00513	0	7e-05	2e-05	0.00014	0.03029	7e-05	0.00884	0.0685292	2	Ca2-H36-C20-N4-Cl4-O8-F4	0	0	equal_bothsteps	equal	0	Success at all eik	This sg doesnt have any
309	CAGLIS11_FSR	-1e-05	0	0	0.04897	0	0	0	0	0	0	0.02175	0	-7e-05	-3e-05	-2e-05	0	0	0.12809	0.12809	222	Ca2-H44-C24-O24	0	0	equal_bothsteps	equal	0	Success at all eik	This sg doesnt have any
310	OPISAJ_FSR	-1e-05	1e-05	8e-05	0.00938	2e-05	-0.03392	0.02236	-0.05965	-0.06376	0	0.00659	0	-5e-05	-3e-05	-1e-05	-0.01289	-3e-05	-0.00152	0.0903707	2	Ba2-H32-C32-N20-O12	0	0	equal_bothsteps	equal	0	Success at all eik	This sg doesnt have any
311	TECSOJ_FSR	0.04484	-0.00109	-0.04593	-0.00496	-0.00084	-0.00077	-0.0096	0.11042	-0.03174	0.02549	0.02143	0.01126	-0.01999	0.06631	-0.04198	0.00689	-0.04193	0.00199	0.142271	1	Ca2-H24-C8-O19	0	0	equal_bothsteps	equal	0	This sg doesnt have any	This sg doesnt have any
312	WUGLOA_FSR	0.00057	0	0.00038	-0.02833	-0.00028	0.02004	-0.10476	0.09853	-0.11633	0	-0.06464	0	9e-05	-1e-05	3e-05	-0.01958	-3e-05	-0.01097	0.195944	2	C10-Ca1-H12-N4-O8	0	0	equal_bothsteps	equal	0	Success at all eik	This sg doesnt have any
313	FUFPOL_FSR	1e-05	-2e-05	0	0.00412	0	0	-6e-05	9e-05	0	0	0.00411	0	-1e-05	-1e-05	-1e-05	0	0	-0.03965	0.03965	-42m	C10-Ca1-H10-N8	0	0	equal_bothsteps	equal	0	Success at all eik	Success at all eik
314	KADHAB_FSR	0.00019	-0.0001	6e-05	0.04212	0.00022	-0.02649	-0.07048	0.05147	-0.08955	0	0.05765	0	6e-05	-0.00018	-1e-05	0.04964	0.00012	0.07353	0.137693	2	Co2-P4-H24-C28-S2-N4-O12	6	6	equal_bothsteps	equal	6	Success at all eik	This sg doesnt have any
315	QUMGAI_FSR	4e-05	7e-05	5e-05	-0.07076	0	0	0	0	0	0	-0.04931	0	0	0	0	0	0	0.07977	0.07977	222	Ba4-H32-C24-O32	0	0	equal_bothsteps	equal	0	Success at all eik	This sg doesnt have any
316	WENSIS_FSR	5e-05	-0.00025	8e-05	0.03455	-0.00181	1e-05	-4e-05	-5e-05	-0.00024	0.00173	0.0345	-6e-05	0.02014	-0.02034	-1e-05	0	0	0.00751	0.03462	-4	C8-Ca1-H16-K2-O24-Zr1	0	0	equal_bothsteps	equal	0	Success at all eik	Success at all eik
317	POMSIV_FSR	0.00019	0.0001	0.00026	0.05682	0	0	1e-05	-1e-05	-1e-05	0	0.10014	0	0	-1e-05	0	0	0	0.02171	0.10014	222	Ca4-H44-C48-N4-O20	0	0	equal_bothsteps	equal	0	Success at all eik	This sg doesnt have any
318	HIQPEE_FSR	0	0	0	-0.00606	0	0	0	0	0	0	-0.00606	0	0	0	5e-05	0	0	0.06891	0.06891	-42m	Co2-H24-C20-N8	6	6	equal_bothsteps	notequal	0	Success at all eik	Success at all eik
319	RIWGEJ_FSR	-7e-05	-4e-05	2e-05	-0.03349	-2e-05	-0.17919	0.06652	-0.48599	-0.02181	0	0.04312	0	-1e-05	-4e-05	-3e-05	-0.00977	-2e-05	0.02857	0.492896	2	Ca2-P2-H26-C6-O22	0	0	equal_bothsteps	equal	0	Success at all eik	This sg doesnt have any
320	KIVYIY_FSR	-0.56327	0.08218	0.00872	0	-0.11082	0	0.00027	-2e-05	2e-05	0.04819	8e-05	0.05694	-0.14688	0.08677	0.13145	0	-0.05111	0	0.604878	m	Ba2-C16-H30-N2-O24	0	0	equal_bothsteps	equal	0	Success at all eik	This sg doesnt have any
321	LIKREE_FSR	0.00023	5e-05	-0.0002	0.07204	-8e-05	-0.10113	0.06561	0.02989	0.43998	0	0.17967	0	-4e-05	-4e-05	-3e-05	0.1081	1e-05	0.10646	0.480689	2	Ba1-C12-H18-N8-O10	0	0	equal_bothsteps	equal	0	Success at all eik	This sg doesnt have any
322	SOSKOC_FSR	0	1e-05	-6e-05	-0.02585	-4e-05	0.03866	0.05504	0.09142	0.00834	0	-0.01746	0	-1e-05	0	1e-05	-0.02796	1e-05	-0.03827	0.10845	2	Co2-H28-C28-N8-Cl4	6	6	equal_bothsteps	equal	6	Success at all eik	This sg doesnt have any
323	SCNTAD_FSR	0.00018	-8e-05	-8e-05	-0.11051	0	0	-7e-05	0.0002	-0.00011	0	-0.11051	0	-8e-05	-8e-05	0.00017	0	0	-0.11051	0.11051	23	Na4-Ca4-H24-C24-N4-O24	0	0	equal_bothsteps	equal	0	Success at all eik	Success at all eik
324	XEGGEW_FSR	3e-05	1e-05	0	0.01979	-2e-05	-0.0072	-0.05656	-0.11533	-0.04505	0	0.05299	0	7e-05	2e-05	-7e-05	0.0387	2e-05	0.09368	0.146074	2	Co2-H28-C28-N8-Cl4	6	6	equal_bothsteps	equal	6	Success at all eik	This sg doesnt have any
325	UHUXAW01_FSR	0.03084	-0.06817	-0.02983	0	0.00329	0	0.00013	0.00024	0.00015	0.08534	3e-05	0.00964	0.00722	-0.02263	0.00109	0	-0.00717	0	0.0858875	m	Co2-H24-C28-N8-O8	6	6	equal_bothsteps	notequal	0	Success at all eik	This sg doesnt have any
326	PEGXUU_FSR	-0.0001	-3e-05	-2e-05	0.04937	-3e-05	-0.02792	0.05131	0.00558	0.02772	0	0.0303	0	0	-2e-05	1e-05	-0.12481	-8e-05	0.01328	0.136158	2	Bi2-H18-C10-S2-N2-Cl2-O4	0	0	equal_bothsteps	equal	0	Success at all eik	This sg doesnt have any
327	SINKUX_FSR	7e-05	0.00045	-4e-05	0.04597	2e-05	0.01457	-0.09499	0.35066	-0.23079	0	-0.0007	0	2e-05	-0.00026	-0.00013	0.09009	3e-05	0.06734	0.430407	2	C20-Co2-H30-N4-O12-P2	2	2	equal_bothsteps	notequal	0	Success at all eik	This sg doesnt have any
328	OZAXET_FSR	0.00023	6e-05	-1e-05	-0.06702	4e-05	0.10017	-0.02507	0.12955	0.09951	0	-0.02693	0	-4e-05	0.00011	-0.00015	0.01085	-8e-05	0.01718	0.167449	2	Co2-H20-C26-O12	6	6	equal_bothsteps	equal	6	Success at all eik	This sg doesnt have any
329	JUYVOO_FSR	0.02826	-0.02836	-5e-05	-0.01012	0	0	0.00011	-8e-05	0.00023	0.00019	0.01073	-0.02891	-1e-05	-1e-05	-2e-05	0	0	0	0.0412959	32	Bi6-H18-C24-O30	0	0	equal_bothsteps	equal	0	Success at all eik	Success at all eik
330	CAASCO03_FSR	-9e-05	4e-05	-6e-05	0.01832	7e-05	-0.03381	0.03436	-0.23555	-0.06844	0	0.00027	0	-4e-05	0.00025	-2e-05	0.00238	0.0001	0.04017	0.247686	2	Ca2-H36-C24-O28	0	0	equal_bothsteps	equal	0	Success at all eik	This sg doesnt have any
331	RAJSIG_FSR	-1e-05	-1e-05	0	0.0318	0	-0.00445	0.06454	0.03508	0.0328	0	-0.0038	0	0	0	0	0.04608	0	0.00789	0.0805376	2	Co2-H44-C28-N4-Cl4-O2	6	6	equal_bothsteps	equal	6	Success at all eik	This sg doesnt have any
332	EGAHOK_FSR	3e-05	-3e-05	-5e-05	0.02567	0	0	4e-05	1e-05	0	0	-0.01993	0	0	0	1e-05	0	0	-0.01673	0.0256701	222	Bi4-H60-C56-O4	0	0	equal_bothsteps	equal	0	Success at all eik	This sg doesnt have any
333	CAFORM13_FSR	-1e-05	5e-05	3e-05	-0.07619	0	0	5e-05	-1e-05	3e-05	0	0.07619	0	0	0	0	0	0	0	0.07619	422	Ca4-H8-C8-O16	0	0	equal_bothsteps	equal	0	Success at all eik	Success at all eik
334	PEHGAM_FSR	0	0	1e-05	0.0611	0	0	-1e-05	1e-05	0	0	0.02201	0	-1e-05	-1e-05	-2e-05	0	0	-0.00108	0.0611	222	Bi4-H32-C48-Cl4	0	0	equal_bothsteps	equal	0	Success at all eik	This sg doesnt have any
335	VIHTEL01_FSR	-7e-05	4e-05	-4e-05	0.08221	0	0	8e-05	-0.00011	-7e-05	0	0.08221	0	2e-05	2e-05	-4e-05	0	0	-0.09423	0.09423	-42m	C16-Co2-H12-N8-O4	6	6	equal_bothsteps	equal	6	Success at all eik	Success at all eik
336	INEYIK_FSR	-7e-05	7e-05	1e-05	-0.03337	-3e-05	0.02533	0.00781	-0.1234	-0.03165	0	-0.0331	0	-5e-05	-3e-05	-3e-05	-0.00761	0	-0.01246	0.131856	2	Ca2-H44-C36-O16	0	0	equal_bothsteps	equal	0	Success at all eik	This sg doesnt have any
337	KULJEI_FSR	0.00204	-0.00023	0.00573	0	-0.15608	0	-0.00013	0.00052	0.0001	-0.0223	0	0	-0.43552	-0.32019	-0.67111	0	0	0	0.861753	mm2	Bi8-C28-H12-N4-O24	0	0	equal_bothsteps	equal	0	Success at all eik	This sg doesnt have any
338	AXUVUL_FSR	0.00016	8e-05	-4e-05	-1e-05	0	0	-1e-05	-7e-05	8e-05	0	0.04122	0	-1e-05	-2e-05	-1e-05	0	0	-0.01071	0.0412201	222	Sb4-H52-C24-N4-O8-F12	0	0	equal_bothsteps	equal	0	Success at all eik	This sg doesnt have any
339	QOSXON_FSR	0	0	0	0.04323	0	0	0	0	0	0	0.11002	0	-6e-05	-3e-05	-2e-05	0	0	-0.01131	0.11002	222	Ca2-H24-C8-O20	0	0	equal_bothsteps	equal	0	Success at all eik	This sg doesnt have any
340	KOSJAF_FSR	-0.00096	-0.00186	-0.00344	0.00145	0.12396	0.07507	0.07374	-0.07541	-0.002	0.12222	0	0	0.13614	0.13614	-0.09907	0	0	0	0.216525	3m	C24-Co6-H12-O18	0	0	equal_bothsteps	notequal	12	Success at all eik	Success at all eik
341	FAZPIH_FSR	0.00021	0.00037	1e-05	0.20425	0	0	0	0	1e-05	0	0.12742	0	0	0	0	0	0	0.0667	0.20425	222	Co4-H16-C24-N16-O8	12	12	equal_bothsteps	notequal	0	Success at all eik	This sg doesnt have any
342	OCEQIX_FSR	0.0001	5e-05	0.00012	0	-0.31343	0	5e-05	2e-05	-2e-05	-0.07875	0	0	-0.24058	0.05805	-0.02352	0	0	0	0.31343	mm2	C20-Co4-H20-N8-O8	12	12	equal_bothsteps	equal	12	Success at all eik	This sg doesnt have any
343	DENTAS_FSR	0	0	0	0	-0.06819	0	5e-05	5e-05	1e-05	-0.00534	0	0	-0.12012	0.08018	-0.03594	0	0	0	0.148827	mm2	C13-Cl2-Co1-H14-N2	3	3	equal_bothsteps	equal	3	Success at all eik	This sg doesnt have any
344	NAFQIV_FSR	-0.00055	6e-05	2e-05	0.0892	0	0	1e-05	0	0	0	-0.0314	0	-2e-05	1e-05	-1e-05	0	0	-0.03535	0.0892017	222	Co4-H16-C16-O20	12	12	equal_bothsteps	notequal	0	Success at all eik	This sg doesnt have any
345	EKEXEY01_FSR	0.00021	0.00019	1e-05	-0.04074	3e-05	-0.01479	-0.16215	-0.47542	-0.02047	0	0.04534	0	-0.00017	-8e-05	6e-05	0.01186	-8e-05	0.07433	0.504769	2	C18-Co3-H30-O24	9	3	notequal_bothsteps	notequal	3	Success at all eik	This sg doesnt have any
346	WUBDII_FSR	0	1e-05	-1e-05	-0.00885	-1e-05	0.03356	0.00687	-0.13613	0.03054	0	-0.05515	0	1e-05	3e-05	6e-05	0.00671	2e-05	-0.00314	0.150176	2	Co4-P2-H44-C22-N2-O12	12	12	equal_bothsteps	notequal	0	Success at all eik	This sg doesnt have any
347	IXUCOT_FSR	0.0983	0.01549	0.03953	-0.00045	-0.02468	-0.00086	-0.01702	-0.01443	-0.01135	0.0126	0.00195	-0.00172	-0.0436	0.1502	-0.01985	-0.00044	0.14336	-0.00084	0.215772	m	C38-Co2-H24-N8-O8	6	6	equal_bothsteps	equal	6	Success at all eik	This sg doesnt have any
348	XEJWUG_FSR	-0.00097	-0.00038	-0.00083	0.01167	0	0	-1e-05	0.00019	-5e-05	0	0.05416	0	0.00016	0.00056	0	0	0	0.00712	0.0541604	222	Co4-H32-C36-N4-O20	12	12	equal_bothsteps	equal	12	Success at all eik	This sg doesnt have any
349	IQOZUJ_FSR	9e-05	0	1e-05	0	-0.13429	0	-4e-05	-2e-05	-5e-05	0.12366	0	0	-0.23537	0.33955	-0.17793	0	0	0	0.449836	mm2	C24-Co4-H20-N16	8	8	equal_bothsteps	notequal	0	Success at all eik	This sg doesnt have any
350	ISAGOY_FSR	-5e-05	-5e-05	-3e-05	-0.00179	0	-0.03243	-0.02942	-0.05184	-0.00876	0	-0.01099	0	4e-05	8e-05	5e-05	0.04351	4e-05	0.02815	0.0612416	2	C30-Co1-H32-N6-S2-Si2	1	1	equal_bothsteps	equal	1	Success at all eik	This sg doesnt have any
351	SOWTIJ_FSR	0	1e-05	0	0	-0.05607	0	0.00014	0.00025	-4e-05	-0.00704	0	0	0.03562	-0.03951	0.44883	0	0	0	0.451971	mm2	Co4-H12-C28-N4-O16	12	12	equal_bothsteps	equal	12	Success at all eik	This sg doesnt have any
352	EQOBUH_FSR	3e-05	1e-05	5e-05	0	-0.03496	0	-4e-05	-5e-05	-3e-05	0.11396	0	0	-0.08896	0.12437	-0.09413	0	0	0	0.179561	mm2	C24-Co4-H24-N16	12	12	equal_bothsteps	equal	12	Success at all eik	This sg doesnt have any
353	TIDVUZ_FSR	0.02622	-0.02766	0.01971	0	0.05148	0	0	0	-1e-05	-0.10167	-1e-05	-0.0299	-0.0559	-0.11121	-0.07901	0	0.03841	0	0.153062	m	C48-Co2-H28-N4-O12-S2	2	2	equal_bothsteps	notequal	6	Success at all eik	This sg doesnt have any
354	NABCIE_FSR	1e-05	2e-05	1e-05	0	-0.73182	0	2e-05	3e-05	1e-05	0.73185	0	0	0.05883	-0.05887	-3e-05	0	0	0	0.73185	-42m	Co2-H40-C48-N8-F4	2	2	equal_bothsteps	notequal	0	Success at all eik	Success at all eik
355	NEDXOJ02_FSR	-6e-05	-0.00023	-0.00036	-0.0557	3e-05	-0.06661	0.01837	-0.03728	0.05844	0	-0.03133	0	0.0003	6e-05	-5e-05	0.01467	-1e-05	-0.0301	0.0880481	2	Co2-H28-C36-N4-O10	2	2	equal_bothsteps	notequal	0	Success at all eik	This sg doesnt have any
356	MINLIG_FSR	2e-05	0	0	0.03772	-1e-05	-0.00971	0.02559	-0.05349	0.10995	0	-0.15495	0	4e-05	-3e-05	-2e-05	-0.02217	3e-05	-0.03771	0.199034	2	Cs2-H20-C30-N2-O10	0	0	equal_bothsteps	equal	0	Success at all eik	This sg doesnt have any
357	VIGCAR_FSR	-0.1517	-0.06797	-0.08084	0	0.005	0	-0.00021	-0.00055	-0.00023	-0.10181	-0.00059	-0.039	0.05454	-0.05427	-0.43125	0	-0.06007	0	0.448214	m	C8-Co2-H10-N4-O8-P2	6	6	equal_bothsteps	equal	6	Success at all eik	This sg doesnt have any
358	YOZSAJ_FSR	0.00015	-1e-05	7e-05	-0.14491	0	0	-0.00119	-0.00133	-0.00104	0	-0.0435	0	0.0004	0.00018	0.00031	0	0	41.9889	41.9889	222	Co4-H16-C24-N8-O16	12	2	notequal_bothsteps	equal	12	Success at all eik	This sg doesnt have any
359	INOKAZ_FSR	4e-05	0	1e-05	-0.17068	0	0	1e-05	0	1e-05	0	0.17069	0	0	0	-1e-05	0	0	0	0.17069	622	Cs2-Ni2-H6-C6-O12	4	4	equal_bothsteps	equal	4	Success at all eik	Success at all eik
360	COMALT01_FSR	-0.0002	6e-05	-0.00017	-0.03185	-3e-05	0.05591	0.10636	0.03943	-0.03547	0	-0.0299	0	-6e-05	-6e-05	3e-05	-0.00988	-3e-05	-0.08982	0.122553	2	Co2-H16-C8-O14	6	6	equal_bothsteps	equal	6	Success at all eik	This sg doesnt have any
361	RENWEM01_FSR	0.12342	-0.1741	0.00508	0	-0.14057	0	3e-05	5e-05	-1e-05	-0.16802	-3e-05	-0.0469	-0.03552	-0.22362	-0.09414	0	-0.06154	0	0.327643	m	C8-Co2-H12-O12	2	2	equal_bothsteps	notequal	6	Success at all eik	This sg doesnt have any
362	RIWVAV_FSR	0.08205	0.00981	0.04246	0	0.01862	0	3e-05	4e-05	-8e-05	-0.03186	1e-05	-0.00636	-0.02365	-0.04401	-0.05297	0	-0.01091	0	0.111092	m	C44-Co2-H36-N8-O8	6	6	equal_bothsteps	equal	6	Success at all eik	This sg doesnt have any
363	ODIZOQ01_FSR	0.14726	0.00679	0.14121	0	0.01148	0	0.00049	5e-05	-0.00032	-0.06819	-0.00013	-0.05828	0.08446	0.01837	0.14956	0	0.09163	0	0.273494	m	C32-Co2-H24-N4-O8	6	6	equal_bothsteps	equal	6	Success at all eik	This sg doesnt have any
364	PIRTAN_FSR	0.0001	-1e-05	0.00018	0.02429	0	0	0	0	0	0	0.0848	0	0	0	0	0	0	0.11875	0.11875	222	Cs4-H40-C20-Cl4-O20	0	0	equal_bothsteps	equal	0	Success at all eik	This sg doesnt have any
365	LIGRAW_FSR	0	0	0	0	0.21301	0	0	0	0	-0.11437	0	0	0.18333	0.16208	0.22806	0	0	0	0.334501	mm2	Co4-P4-H40-C36-N4-O20	12	12	equal_bothsteps	notequal	6	Success at all eik	This sg doesnt have any
366	KEKLEU_FSR	0.0001	-4e-05	0.00011	-0.15573	-5e-05	-0.0973	0.40979	-0.84648	0.03432	0	-0.05483	0	-4e-05	5e-05	-8e-05	0.03771	6e-05	-0.02056	0.942677	2	Co2-P2-H20-C6-N2-O16	6	6	equal_bothsteps	notequal	0	Success at all eik	This sg doesnt have any
367	AMUDUJ_FSR	-0.00013	0	0.00043	-0.02117	0.00019	0.04306	0.01988	0.04584	0.08417	0	-0.01733	0	-0.00011	-0.00012	0.00111	0.20168	0.00043	-0.06116	0.213353	2	C32-Cl2-Co2-H26-O14	6	6	equal_bothsteps	equal	6	Success at all eik	This sg doesnt have any
368	VOCXUH_FSR	0.02684	-0.02406	0.00016	0	0	0	2e-05	0	0	0	0	-0.02543	-1e-05	-1e-05	0	0	0	0	0.0360457	-6m2	Co3-H33-C57-N6-O18	0	0	equal_bothsteps	equal	0	Success at all eik	Success at all eik
369	VAVQUF_FSR	-0.01873	-0.07445	-0.11948	-0.00099	0.07333	0.00135	-0.02818	-0.03545	-0.03073	0.11426	-0.00102	-0.03461	0.07259	0.05801	-0.13322	0.00203	-0.0814	-0.00082	0.188539	m	C38-Co2-H20-N8-O14	2	2	equal_bothsteps	notequal	0	Success at all eik	This sg doesnt have any
370	ACOVEU_FSR	-2e-05	-3e-05	1e-05	0.0903	0	0	-0.00019	-0.00014	-0.00019	0	-0.08821	0	-4e-05	-6e-05	2e-05	0	0	-0.04557	0.0903	222	C8-Co2-H8-O12	6	6	equal_bothsteps	equal	6	Success at all eik	This sg doesnt have any
371	OCACUR_FSR	0.05132	-0.03798	0.05949	0	-0.03222	0	-3e-05	-3e-05	-8e-05	0.06013	1e-05	0.09892	0.00218	-0.03553	0.06598	0	0.04244	0	0.115762	m	C32-Co4-H32-N4-O20	12	12	equal_bothsteps	notequal	0	Success at all eik	This sg doesnt have any
372	WOBQAH_FSR	0.55578	0.30783	-0.27084	0	-0.04435	0	0.00402	0.00355	0.00036	0.07045	7e-05	-0.03607	0.14109	-0.04469	-0.18324	0	0.09746	0	0.71161	m	C16-Co4-H14-O12-P2	0	6	notequal_bothsteps	equal	0	Success at all eik	This sg doesnt have any
373	WANXIU_FSR	2e-05	-4e-05	-1e-05	-0.15787	0	0	4e-05	-3e-05	0	0	-0.19627	0	0	0	0	0	0	-0.2231	0.2231	222	Co4-H24-C32-S8-N16	12	12	equal_bothsteps	notequal	0	Success at all eik	This sg doesnt have any
374	EQOCIW_FSR	4e-05	3e-05	4e-05	0	-0.0221	0	0.00015	0.00017	9e-05	0.0886	0	0	-0.05486	0.11325	-0.05802	0	0	0	0.138569	mm2	C24-Co4-H24-N16	12	12	equal_bothsteps	notequal	6	Success at all eik	This sg doesnt have any
375	SEJSUW_FSR	-8e-05	-0.00011	-3e-05	-0.04184	0	0	7e-05	1e-05	0.00025	0	0.07882	0	0.00031	-0.00015	-0.00036	0	0	0.10077	0.100771	222	Co4-H24-C16-O24	12	12	equal_bothsteps	notequal	0	Success at all eik	This sg doesnt have any
376	MINLOM_FSR	-3e-05	0	-1e-05	-0.03587	-1e-05	-0.03889	0.08363	0.15489	0.07952	0	-0.17421	0	-3e-05	0	-1e-05	0.03089	0	-0.10243	0.26011	2	Cs2-H20-C30-N2-O8	0	0	equal_bothsteps	equal	0	Success at all eik	This sg doesnt have any
377	UNOCOQ03_FSR	-0.00011	-6e-05	8e-05	0.0179	0	0	0.00028	-0.00028	0	0	-0.01783	0	0	0	0	0	0	0	0.0179006	622	K2-Co2-H6-C6-O12	6	6	equal_bothsteps	equal	6	Success at all eik	Success at all eik
378	VEWJUF_FSR	0.13258	0.04887	-0.10772	0.01047	-0.03412	0.0098	-0.03665	0.10505	-0.05589	-0.01951	-0.00713	-0.02134	-0.05876	-0.08504	-0.00316	0.00955	-0.02687	-0.00394	0.200395	1	Co1-H19-C23-N3-O8	3	3	equal_bothsteps	equal	3	This sg doesnt have any	This sg doesnt have any
379	MIFVII_FSR	-1e-05	1e-05	1e-05	-0.08282	1e-05	-0.01109	0.03787	-0.08589	0.02496	0	-0.08955	0	-2e-05	-1e-05	1e-05	-0.14382	-2e-05	-0.06397	0.176977	2	C24-Co1-H28-N2-O6	3	3	equal_bothsteps	equal	3	Success at all eik	This sg doesnt have any
380	EMEFAD_FSR	-0.04121	0.03778	-0.00257	0.02369	0.0682	-0.09024	-0.09007	0.08874	-0.00133	0.07021	-0.01334	0.02045	0.12974	0.12974	0.69867	0	0	0	0.722369	3	C18-Co3-H12-N3-O10-P1	9	9	equal_bothsteps	notequal	3	Success at all eik	Success at all eik
381	NEYBEZ_FSR	-3e-05	7e-05	0.0002	-0.22481	0	0	-4e-05	-5e-05	-0.00012	0	-0.00972	0	-0.00029	-0.00038	-0.00016	0	0	-0.21325	0.22481	222	C24-Co4-H12-N4-O8-S4	8	2	notequal_bothsteps	notequal	12	Success at all eik	This sg doesnt have any
382	DUKXEO_FSR	1e-05	3e-05	2e-05	0.06528	0	0	1e-05	0	1e-05	0	-0.06527	0	0	0	0	0	0	0	0.06528	422	Co4-H56-C44-N16	12	12	equal_bothsteps	equal	12	Success at all eik	Success at all eik
383	BECHEY_FSR	-0.01439	0.00849	-0.07753	0.0019	-0.00602	0.02905	0.0361	0.02503	0.00069	-0.01525	0.01305	0.04919	-0.07038	-0.01253	-0.04715	-0.01421	0.00915	0.04637	0.120237	1	Fe2-H20-C29-N18-O1	0	0	equal_bothsteps	equal	0	This sg doesnt have any	This sg doesnt have any
384	TAKTEH_FSR	-0.00029	0.00031	-1e-05	0.05236	0	0	-2e-05	-2e-05	-4e-05	0	-0.05218	0	1e-05	1e-05	5e-05	0	0	0	0.0523617	422	C32-Ga4-H16-O20	0	0	equal_bothsteps	equal	0	Success at all eik	Success at all eik
385	OTEGOL01_FSR	3e-05	5e-05	-6e-05	-0.04262	0	0	-8e-05	-9e-05	-0.0002	0	0.04256	0	0	0	0.0002	0	0	0	0.0426201	422	C32-H16-In4-O20	0	0	equal_bothsteps	equal	0	Success at all eik	Success at all eik
386	XIVLUK_FSR	2e-05	-5e-05	0	0.02952	0	0	-3e-05	4e-05	1e-05	0	0.02952	0	2e-05	2e-05	7e-05	0	0	0.2393	0.2393	-42m	C8-H12-In4-O20	0	0	equal_bothsteps	equal	0	Success at all eik	Success at all eik
387	YITPUM_FSR	-2e-05	-1e-05	0	-0.02399	1e-05	-0.17042	-0.11593	0.32686	0.11381	0	0.04904	0	-1e-05	1e-05	-4e-05	0.23258	0	-0.17602	0.368286	2	C11-Cl8-H22-Hg4-N2-O4	0	0	equal_bothsteps	equal	0	Success at all eik	This sg doesnt have any
388	AXUFAB_FSR	0.05855	0.03496	0.05863	0	0.05105	0	-1e-05	-1e-05	-5e-05	0.0071	-3e-05	0.02335	0.06279	0.0144	0.01544	0	0.09454	0	0.148352	m	C28-Cl4-F8-H16-Hg4-O4	0	0	equal_bothsteps	equal	0	Success at all eik	This sg doesnt have any
389	ABIXAM_FSR	0	0	0	0.0879	0	0	0	-1e-05	0	0	0.02911	0	0.00012	-5e-05	-0.00029	0	0	0.05197	0.0879	222	Hg2-H56-C56-I4-N4-O4	0	0	equal_bothsteps	equal	0	Success at all eik	This sg doesnt have any
390	HOYMIT_FSR	-0.00012	-9e-05	0.00012	0.12602	0	0	0	0	0	0	0.11639	0	0	0	0	0	0	0.10144	0.12602	222	Hg4-H36-C48-I8-N8-Cl4	0	0	equal_bothsteps	equal	0	Success at all eik	This sg doesnt have any
391	INOZIU_FSR	-3e-05	4e-05	-0.0001	0.00043	7e-05	0.00141	-0.00156	-0.0022	-0.00018	0	-0.00042	0	5e-05	0.00018	-7e-05	-0.00045	-3e-05	-0.00316	0.00351819	2	Hg2-H28-C26-I4-N4	0	0	equal_bothsteps	equal	0	Success at all eik	This sg doesnt have any
392	KELLAR_FSR	0	-1e-05	0	-0.05848	0	0	0	-1e-05	0	0	-0.12787	0	4e-05	-8e-05	3e-05	0	0	-0.09682	0.12787	222	Cs4-H24-Pd4-C12-N4-Cl8-O12	0	0	equal_bothsteps	equal	0	Success at all eik	This sg doesnt have any
393	ORONOA_FSR	-3e-05	-1e-05	1e-05	0	0.00088	0	-1e-05	-1e-05	0	0.00114	0	0	0.00852	0.00521	-0.00377	0	0	0	0.0106747	mm2	K12-H20-C24-O28	0	0	equal_bothsteps	equal	0	Success at all eik	This sg doesnt have any
394	EBANAZ_FSR	0.09975	0.11716	-0.0595	0	0.15901	0	-9e-05	-8e-05	-0.00022	0.12927	6e-05	0.04647	0.12428	0.25455	0.15142	0	-0.06551	0	0.340123	m	K2-H8-C18-O12-F2	0	0	equal_bothsteps	equal	0	Success at all eik	This sg doesnt have any
395	APIROH_FSR	-1e-05	-8e-05	1e-05	0.08218	0	0	1e-05	-0.00034	-0.00053	0	0.01761	0	0	-1e-05	2e-05	0	0	-0.01545	0.08218	222	C10-F3-H8-In1-N2	0	0	equal_bothsteps	equal	0	Success at all eik	This sg doesnt have any
396	ZEGRUB_FSR	0.0001	-0.00056	-5e-05	0.04713	0	0	0.00152	-0.0004	0.00042	0	-0.04836	0	0.00032	0.00032	2e-05	0	0	0	0.0483874	422	C32-Fe4-H16-O20	4	0	notequal_bothsteps	notequal	20	Success at all eik	Failed at e25
397	LECYAW_FSR	0.0224	0.04103	-0.03584	0	0.02045	0	-9e-05	-9e-05	-5e-05	-0.00825	0.0001	-0.0325	0.02357	-0.01693	0.09877	0	-0.03132	0	0.116349	m	C40-H36-Hg2-I4-N8-O4	0	0	equal_bothsteps	equal	0	Success at all eik	This sg doesnt have any
398	WOCGAY_FSR	2e-05	4e-05	-5e-05	0	0.06235	0	0	2e-05	1e-05	-0.08876	0	0	0.09247	-0.12943	-0.12825	0	0	0	0.20433	mm2	Cs4-H28-C32-O12	0	0	equal_bothsteps	equal	0	Success at all eik	This sg doesnt have any
399	IJUTAK_FSR	-1e-05	-1e-05	-1e-05	0	-0.08831	0	8e-05	-0.00015	-0.0002	-0.15372	0	0	-0.11583	-0.2984	-0.13191	0	0	0	0.346207	mm2	Fe4-H36-C28-N4-O28	0	0	equal_bothsteps	equal	0	Success at all eik	This sg doesnt have any
400	EHIWAU_FSR	-0.17986	-0.08255	-0.08453	0.03412	-0.03149	0.05294	-0.02451	0.08472	0.11843	0.01655	-0.012	-0.05508	-0.09604	0.01292	-0.18823	0.02901	-0.01898	-0.00391	0.300512	1	Hg2-H19-C20-N7-Cl4-O1	0	0	equal_bothsteps	equal	0	This sg doesnt have any	This sg doesnt have any
401	EBIKIK_FSR	-0.00017	-2e-05	-7e-05	0.09354	0	0	-0.00015	-0.00023	-0.00016	0	0.09352	0	5e-05	5e-05	4e-05	0	0	0.11598	0.11598	-42m	C48-Fe2-H40-K4-S8	8	8	equal_bothsteps	equal	8	Success at all eik	Success at all eik
402	ADOJIN_FSR	2e-05	4e-05	1e-05	0	-0.02055	0	-4e-05	-2e-05	-1e-05	0.02063	0	0	-0.01819	0.01809	-3e-05	0	0	0	0.025654	-42m	Hg2-H12-C20-Br8-N4-Cl4	0	0	equal_bothsteps	equal	0	Success at all eik	Success at all eik
403	KMTSUL01_FSR	2e-05	0	0	-0.10275	0	0	0	0	0	0	-0.07317	0	-2e-05	0	1e-05	0	0	0.20247	0.20247	222	K12-H12-C4-S12-O40	0	0	equal_bothsteps	equal	0	Success at all eik	This sg doesnt have any
404	SEJTAD_FSR	4e-05	-3e-05	-5e-05	-0.0364	0	0	0.00037	3e-05	-0.00011	0	-0.01401	0	-5e-05	-0.00036	-0.00036	0	0	0.04657	0.0465728	222	Fe4-H24-C16-O24	16	16	equal_bothsteps	notequal	8	Success at all eik	This sg doesnt have any
405	RODMOP_FSR	0.02834	-0.02832	2e-05	-0.01455	0	0	4e-05	-2e-05	-1e-05	4e-05	0.01458	-0.02835	0	0	0	0	0	0	0.0426249	32	Fe3-H42-C30-N12	12	12	equal_bothsteps	notequal	4	Success at all eik	Success at all eik
406	HOYLOY_FSR	-0.00011	-0.0002	6e-05	-0.1444	0	0	0	-1e-05	-1e-05	0	-0.10455	0	1e-05	0	1e-05	0	0	-0.09946	0.1444	222	Hg4-H36-C48-Br8-N8-Cl4	0	0	equal_bothsteps	equal	0	Success at all eik	This sg doesnt have any
407	IDIGAF_FSR	0	-9e-05	-0.00015	-0.05374	0	0	0	0	-1e-05	0	0.00533	0	0	0	1e-05	0	0	0.00594	0.0537403	222	Hg4-H32-C36-N12-Cl4-O8	0	0	equal_bothsteps	equal	0	Success at all eik	This sg doesnt have any
408	LECYEA_FSR	-0.06027	0.02451	-0.03227	0	0.01329	0	1e-05	0	-8e-05	-0.03311	-3e-05	-0.00723	0.02888	-0.06805	0.10658	0	-0.01808	0	0.143149	m	C40-H36-Hg2-I4-N8-O4	0	0	equal_bothsteps	equal	0	Success at all eik	This sg doesnt have any
409	FEZMUT_FSR	0.00159	0.00047	0.05441	0	-0.02401	0	0	0	0	0.01144	0	0.00207	-0.02989	-0.03314	0.10826	0	-0.00021	0	0.127923	m	K2-H50-C26-N4-O16	0	0	equal_bothsteps	equal	0	Success at all eik	This sg doesnt have any
410	BESNET_FSR	2e-05	5e-05	-0.00017	0.0164	0.00012	-0.00207	0.04419	-0.04244	-0.03955	0	-0.0149	0	0	2e-05	1e-05	-0.0082	0	0.0059	0.074432	2	C36-Cl4-H32-Hg2-N4-O12	0	0	equal_bothsteps	equal	0	Success at all eik	This sg doesnt have any
411	ADOJOT_FSR	-1e-05	-1e-05	0	0	-0.04529	0	0	1e-05	0	0.04541	0	0	-0.01286	0.01264	-8e-05	0	0	0	0.04541	-42m	Hg2-H36-C28-N4-Cl4	0	0	equal_bothsteps	equal	0	Success at all eik	Success at all eik
412	NIVXAU_FSR	-0.04568	-0.00508	-0.02992	0	-0.03049	0	-0.00029	-8e-05	-0.00088	0.00908	0.0004	0.03827	-0.04801	-0.06179	0.03799	0	-0.08169	0	0.124603	m	C24-Fe2-H26-N2-S4	8	8	equal_bothsteps	equal	8	Success at all eik	This sg doesnt have any
413	JOHFIX_FSR	0	2e-05	1e-05	-0.10792	1e-05	0.00384	-0.05425	0.04411	0.02161	0	-0.03058	0	0	0	-2e-05	-0.21485	-1e-05	-0.09657	0.255358	2	Hg2-H18-C20-N6-O6	0	0	equal_bothsteps	equal	0	Success at all eik	This sg doesnt have any
414	TAKTIL_FSR	-0.00063	0.00023	0.0001	0.04686	0	0	0.00011	0.0003	-0.00019	0	-0.04717	0	1e-05	1e-05	-6e-05	0	0	0	0.0471715	422	C44-Ga4-H16-O44	0	0	equal_bothsteps	equal	0	Success at all eik	Success at all eik
415	ADOJEJ_FSR	2e-05	-1e-05	0	0	-0.00746	0	0	4e-05	0	0.00738	0	0	-0.00864	0.00858	-2e-05	0	0	0	0.0121765	-42m	Hg2-H12-C20-N4-Cl12	0	0	equal_bothsteps	equal	0	Success at all eik	Success at all eik
416	OWIHUZ_FSR	-1e-05	-1e-05	-0.0001	-0.04724	0	0	2e-05	-2e-05	-6e-05	0	0.04719	0	5e-05	5e-05	0.00026	0	0	0	0.0472401	422	C32-H24-In4-O20	0	0	equal_bothsteps	equal	0	Success at all eik	Success at all eik
417	RODXEO_FSR	0	0	0	-0.05811	0	0	0	0	0	0	-0.02322	0	0	0	0	0	0	-0.0244	0.05811	222	Hg4-H56-C40-Br8-N8	0	0	equal_bothsteps	equal	0	Success at all eik	This sg doesnt have any
418	TELMOO01_FSR	2e-05	0	1e-05	0.00937	1e-05	0.00304	-0.00861	-0.05558	0.06761	0	-0.12701	0	2e-05	-3e-05	-1e-05	-0.02971	0	-0.04571	0.154486	2	K2-H20-C30-N2-O10	0	0	equal_bothsteps	equal	0	Success at all eik	This sg doesnt have any
419	LUHTEO_FSR	0.03403	0.03124	-0.06208	0	-0.00983	0	-1e-05	0	0	0.03162	0	0.01276	0.06822	-0.05083	-0.1087	0	-0.01512	0	0.150901	m	K2-H50-C28-N4-O14	0	0	equal_bothsteps	equal	0	Success at all eik	This sg doesnt have any
420	ACUFOU_FSR	0.07586	0.1261	0.18286	0	0.1581	0	-0.00014	0.00011	-0.0002	0.39211	-0.00015	0.17692	0.12653	-0.12689	0.24026	0	0.14933	0	0.430176	m	C20-H14-K2-N8-O16	0	0	equal_bothsteps	equal	0	Success at all eik	This sg doesnt have any
421	PILTEM_FSR	0	0	0	0	0.06408	0	-9e-05	-6e-05	0.00027	0.0441	0	0	0.14086	0.14629	-0.0093	0	0	0	0.203295	mm2	Hg4-H12-C12-S8-N8-Cl4	0	0	equal_bothsteps	equal	0	Success at all eik	This sg doesnt have any
422	BOXDID_FSR	4e-05	6e-05	2e-05	0.0388	0	0	1e-05	0	1e-05	0	-0.00435	0	0	0	0	0	0	-0.16852	0.16852	222	Cs4-P4-H16-C8-O24	0	0	equal_bothsteps	equal	0	Success at all eik	This sg doesnt have any
423	QOGJAX_FSR	0	0	0	-0.01443	0	0.06607	0.05541	0.04178	0.03587	0	-0.02999	0	0	0	1e-05	0.0128	0	-0.00989	0.0836773	2	K2-H44-C34-N6-O12	0	0	equal_bothsteps	equal	0	Success at all eik	This sg doesnt have any
424	TUFKAH_FSR	-0.00031	-0.00027	-0.00022	0.00231	0	0	1e-05	-1e-05	-1e-05	0	-0.02719	0	0	0	-1e-05	0	0	0.00693	0.02719	222	Hg4-H16-C24-Se4-N8-Cl8	0	0	equal_bothsteps	equal	0	Success at all eik	This sg doesnt have any
425	HOSPIQ_FSR	-0.14154	0.09348	-0.13145	0	0.05558	0	0	1e-05	0	0.00763	0	0.06989	-0.06301	0.0331	-0.12214	0	-0.05441	0	0.253583	m	Hg4-H20-C24-I8-N8-O2	0	0	equal_bothsteps	equal	0	Success at all eik	This sg doesnt have any
426	MALSIE_FSR	0.02965	-0.02951	8e-05	-0.00065	0	0	-0.00037	0.00042	-2e-05	-0.00067	0.00065	-0.02964	-0.00012	-0.00012	5e-05	0	0	0	0.0418449	32	Fe6-H18-C42-O18	24	24	equal_bothsteps	equal	24	Success at all eik	Success at all eik
427	GUJTUB_FSR	-0.00011	-1e-05	7e-05	0	0.03681	0	6e-05	8e-05	0.00025	-0.01116	0	0	-0.01731	-0.04802	0.04094	0	0	0	0.0654344	mm2	Hg4-H48-C24-N16	0	0	equal_bothsteps	equal	0	Success at all eik	This sg doesnt have any
428	TUPSIG01_FSR	-0.00489	0.01865	-0.03413	0	-0.03732	0	-2e-05	-1e-05	0	-0.0081	1e-05	-0.04638	-0.08998	-0.00445	-0.05082	0	-0.06995	0	0.130946	m	C24-H48-I6-K2-O12	0	0	equal_bothsteps	equal	0	Success at all eik	This sg doesnt have any
429	PIRNAH01_FSR	-0.00067	-0.00024	0.00074	-0.00266	0	0	-6e-05	-0.00025	1e-05	0	0.00771	0	2e-05	3e-05	2e-05	0	0	0.0051	0.00771431	222	Cs4-H16-C32-N8-Cl8-O16	0	0	equal_bothsteps	equal	0	Success at all eik	This sg doesnt have any
430	FATHAM_FSR	0.00085	0.00046	4e-05	-0.05401	0	0	-0.00016	-9e-05	-2e-05	0	-0.03037	0	1e-05	1e-05	0	0	0	-0.04845	0.0540187	222	C24-F12-H20-K4-N4-O24	0	0	equal_bothsteps	equal	0	Success at all eik	This sg doesnt have any
431	PIGPUQ01_FSR	-0.05001	-0.00821	-0.02998	-0.02371	-0.03969	-0.01145	-0.04994	-0.16189	-0.06959	-0.00044	-0.07852	-0.02317	-0.00254	0.00281	-0.02614	-0.01186	-0.02543	-0.00695	0.207368	1	Li2-H18-C12-O16	0	0	equal_bothsteps	equal	0	This sg doesnt have any	This sg doesnt have any
432	KNATAR23_FSR	-2e-05	1e-05	1e-05	0.16159	0	0	0	2e-05	1e-05	0	0.11291	0	-0.00012	0	-0.0001	0	0	0.11719	0.16159	222	K4-Na4-H48-C16-O40	0	0	equal_bothsteps	equal	0	Success at all eik	This sg doesnt have any
433	GOJDUG_FSR	-2e-05	-7e-05	0.00018	-0.01171	0	0	0	-1e-05	1e-05	0	0.10779	0	0	0	0	0	0	0.04393	0.10779	222	K4-H16-C24-S4-N12-O12	0	0	equal_bothsteps	equal	0	Success at all eik	This sg doesnt have any
434	ALIHIN_FSR	0.00202	0.0019	0.00408	-0.00075	0.00073	0.00172	0.0024	0.00224	0.00045	0.01242	-0.00101	0.00269	-0.05159	-0.03144	-0.03087	-0.0009	-0.03763	0.00107	0.0777358	m	C26-H22-Li2-N8	0	0	equal_bothsteps	equal	0	Failed at e36	This sg doesnt have any
435	AWOLUU_FSR	5e-05	-9e-05	-2e-05	0	-0.0251	0	0	0	0	0.11334	0	0	0.06464	0.12552	-0.10004	0	0	0	0.173036	mm2	C24-H40-K4-N8-O14-S4	0	0	equal_bothsteps	equal	0	Success at all eik	This sg doesnt have any
436	DUQSEO_FSR	-0.00025	-9e-05	-0.00015	-0.2429	0	0	-1e-05	0	3e-05	0	0.03648	0	0.00012	-2e-05	-0.00015	0	0	0.0178	0.2429	222	C14-H18-La2-N20-O10	0	0	equal_bothsteps	equal	0	Success at all eik	This sg doesnt have any
437	KERWOW_FSR	0	-3e-05	3e-05	0.04597	0	0	-1e-05	-2e-05	1e-05	0	-0.04595	0	0	0	2e-05	0	0	0	0.04597	422	La4-H24-C40-N20-O28	0	0	equal_bothsteps	equal	0	Success at all eik	Success at all eik
438	DURMEJ_FSR	-0.00013	-0.0005	-4e-05	-0.06917	0	0	-4e-05	-0.00017	-1e-05	0	-0.14846	0	0	-2e-05	0	0	0	-0.07154	0.14846	222	K4-H32-C32-N4-O20	0	0	equal_bothsteps	equal	0	Success at all eik	This sg doesnt have any
439	ETUGUW_FSR	-5e-05	-2e-05	0	0	0.07431	0	4e-05	7e-05	-2e-05	-0.02997	0	0	0.00234	-0.04663	-0.04237	0	0	0	0.07431	mm2	Br4-C24-Cl4-H28-K4-N4-O14-S4	0	0	equal_bothsteps	equal	0	Success at all eik	This sg doesnt have any
440	NOGMIG_FSR	0.00322	0.00307	0.00331	-0.00517	0	0	0	-2e-05	-8e-05	-5e-05	-0.00029	0.00014	1e-05	0	-1e-05	-4e-05	-0.0001	-0.00119	0.0075815	222	C16-H16-Li16-N64	0	0	equal_bothsteps	equal	0	Success at all eik	This sg doesnt have any
441	VAHRON_FSR	0.04861	-0.04859	-1e-05	-0.04521	0	0	-0.00011	6e-05	-7e-05	3e-05	0.04516	-0.04863	0.00013	0.00013	0.00013	0	0	0	0.0822673	32	C9-H18-La2-O24	0	0	equal_bothsteps	equal	0	Success at all eik	Success at all eik
442	EDAKIE_FSR	-0.00921	-0.11374	-0.20304	0	0.07142	0	-4e-05	0	-1e-05	0.0159	-1e-05	0.045	0.05638	0.02431	0.64276	0	-0.05941	0	0.683491	m	C8-H14-K2-O12	0	0	equal_bothsteps	equal	0	Success at all eik	This sg doesnt have any
443	QIBBAH_FSR	0	0	0	0	-0.00179	0	0	0	0	-0.08038	0	0	0.08008	-0.08278	0.03793	0	0	0	0.12126	mm2	C38-H30-K2-N4	0	0	equal_bothsteps	equal	0	Success at all eik	This sg doesnt have any
444	YECPEE_FSR	0.00033	-0.04151	-0.05719	0	-0.06026	0	-4e-05	0.00021	3e-05	0.16282	7e-05	0.00809	-1.2361	0.58619	-0.1168	0	-0.72309	0	1.55188	m	C12-H8-K4-N12-O8	0	0	equal_bothsteps	equal	0	Success at all eik	This sg doesnt have any
445	XELHUS_FSR	0.00011	4e-05	-8e-05	0.02161	0	0	5e-05	4e-05	6e-05	0	0.01692	0	1e-05	0	2e-05	0	0	0.00148	0.0216105	222	K8-H36-C24-N4-O28	0	0	equal_bothsteps	equal	0	Success at all eik	This sg doesnt have any
446	SEBMOB_FSR	-0.00014	-8e-05	-2e-05	0.01801	0.00011	-0.36181	-0.34352	0.17448	-0.1681	0	0.18664	0	6e-05	6e-05	6e-05	-0.10498	-3e-05	-0.04904	0.459936	2	Li2-H12-C8-N2-O8	0	0	equal_bothsteps	equal	0	Success at all eik	This sg doesnt have any
447	UNIROZ_FSR	0	0	0	-0.02725	0	-0.13874	-0.18004	0.03421	-0.01759	0	0.01684	0	0	0	0	-0.00387	0	0.13815	0.196501	2	Li2-H10-C8-O12	0	0	equal_bothsteps	equal	0	Success at all eik	This sg doesnt have any
448	OCOKIC_FSR	3e-05	3e-05	-1e-05	0.00067	0	0	0	0	0	0	-0.01177	0	0	0	1e-05	0	0	0.01173	0.01177	222	K4-Si4-B4-H76-C28-N4	0	0	equal_bothsteps	equal	0	Success at all eik	This sg doesnt have any
449	QEVNEN_FSR	-0.00012	-0.00033	-0.00022	0.17052	0	0	0	0	0	0	0.06979	0	0	0	3e-05	0	0	0.12512	0.170521	222	K2-Li2-Sb4-H8-C16-O24	0	0	equal_bothsteps	equal	0	Success at all eik	This sg doesnt have any
450	MINKAX01_FSR	3e-05	6e-05	-3e-05	-0.01585	0	0	-1e-05	4e-05	1e-05	0	0.00508	0	0	1e-05	0	0	0	0.03026	0.03026	222	K4-H48-C60-N4-O20	0	0	equal_bothsteps	equal	0	Success at all eik	This sg doesnt have any
451	SIRPUF_FSR	-0.03581	-0.01021	-0.00686	0	-0.01279	0	-5e-05	1e-05	0	-0.02042	2e-05	-0.00014	0.01592	-0.05285	-0.20459	0	-0.0043	0	0.212059	m	Br4-C36-H24-K4-O8	0	0	equal_bothsteps	equal	0	Success at all eik	This sg doesnt have any
452	NOKCOH_FSR	0.00014	0.00026	0.00019	-0.02655	1e-05	0.00172	-0.12063	0.25635	-0.02362	0	-0.10037	0	0.00017	0.00048	0.00013	-0.0221	5e-05	0.0349	0.301495	2	C20-H20-Li2-N2-O6	0	0	equal_bothsteps	equal	0	Success at all eik	This sg doesnt have any
453	RIZZAB_FSR	0.0128	-0.06029	-0.04733	0	0.0185	0	2e-05	9e-05	0.00014	0.13455	0	-0.02303	0.00941	0.10658	0.08196	0	-0.00368	0	0.155269	m	C22-H26-Li2-N8-O2	0	0	equal_bothsteps	equal	0	Success at all eik	This sg doesnt have any
454	EWOYUL_FSR	1e-05	9e-05	9e-05	-0.0044	0	0	0	0	1e-05	0	-0.01591	0	-1e-05	1e-05	2e-05	0	0	-0.01088	0.01591	222	K4-H32-Pt4-C20-N4-Cl8-O8	0	0	equal_bothsteps	equal	0	Success at all eik	This sg doesnt have any
455	OFOJOL_FSR	2e-05	0	0	-0.0034	2e-05	-0.03711	-0.02895	0.15308	-0.10142	0	0.03616	0	1e-05	2e-05	0	-0.14157	2e-05	0.07239	0.189381	2	Li2-H10-C6-O6	0	0	equal_bothsteps	equal	0	Success at all eik	This sg doesnt have any
456	KHPHAL02_FSR	-1e-05	2e-05	1e-05	0	-0.09974	0	0	-1e-05	0	-0.0128	0	0	-0.13366	0.04424	0.15025	0	0	0	0.205906	mm2	K4-H20-C32-O16	0	0	equal_bothsteps	equal	0	Success at all eik	This sg doesnt have any
457	BENHUA_FSR	-0.00021	-0.0006	-0.00019	0.14545	0	0	0	-2e-05	0	0	-0.00686	0	2e-05	0	2e-05	0	0	0.00689	0.145452	222	K4-H28-C24-N16-O20	0	0	equal_bothsteps	equal	0	Success at all eik	This sg doesnt have any
458	MINQAC_FSR	0	-5e-05	0.00012	-0.07581	-2e-05	0.06374	0.04334	0.03091	-0.00854	0	-0.05611	0	0.00011	0.00105	-0.00019	0.04937	-0.00011	-0.02571	0.113122	2	Li2-H10-C4-N12-O6	0	0	equal_bothsteps	equal	0	Success at all eik	This sg doesnt have any
459	RUYTOW_FSR	-0.16269	0.1539	-0.0031	0.0195	0.00031	-0.00144	0.00923	0.00647	0.00515	-0.00034	-0.01993	0.16035	-0.0008	0.00082	0	-0.00212	0.00122	0.00049	0.224878	32	C63-H36-La3-N3-O18	0	0	equal_bothsteps	equal	0	Success at all eik	Failed at e26
460	XIJXAS_FSR	0	0	0	0.04354	0	0	0	0	0	0	0.06932	0	0	0	0	0	0	0.05261	0.06932	222	K4-H20-C16-O24	0	0	equal_bothsteps	equal	0	Success at all eik	This sg doesnt have any
461	DIKRUL_FSR	9e-05	-8e-05	8e-05	0.10627	0	0	-3e-05	-1e-05	-3e-05	0	0.14019	0	-2e-05	1e-05	-2e-05	0	0	0.1106	0.14019	222	K8-B4-H20-C16-O28	0	0	equal_bothsteps	equal	0	Success at all eik	This sg doesnt have any
462	PEKKEW_FSR	0	0	0	0.10123	0	0	0	1e-05	0	0	-0.10132	0	0	0	0	0	0	0	0.10132	622	K3-Sc3-H12-C12-O30	0	0	equal_bothsteps	equal	0	Success at all eik	Success at all eik
463	VESBEC01_FSR	-0.00016	0.00023	0.0001	-0.03316	0.28218	-0.00012	4e-05	0.00017	0.00013	0.28217	0.03316	0.00013	0.12948	0.12948	0.62962	0	0	0	0.655707	4	La4-H12-C4-S4-O28	0	0	equal_bothsteps	equal	0	Success at all eik	Success at all eik
464	KEHWAY01_FSR	-1e-05	0	0	0.07068	0	0	1e-05	0	0	0	0.0722	0	3e-05	-4e-05	-6e-05	0	0	0.10356	0.10356	222	K4-P4-H48-C36-N8-O36	0	0	equal_bothsteps	equal	0	Success at all eik	This sg doesnt have any
465	XEZXOQ_FSR	0.00051	-0.00022	0.00017	0.00825	0	0	1e-05	0	0	0	0.05242	0	1e-05	-2e-05	2e-05	0	0	0.05329	0.05329	222	K8-H16-C12-N8-O28	0	0	equal_bothsteps	equal	0	Success at all eik	This sg doesnt have any
466	BUTCUQ_FSR	0	0	0	0.02363	0	0	0	-1e-05	0	0	0.00739	0	2e-05	2e-05	-2e-05	0	0	0.06806	0.06806	222	K4-H52-C20-S4-O36	0	0	equal_bothsteps	equal	0	Success at all eik	This sg doesnt have any
467	NUVCUD_FSR	0.12997	-0.13004	-7e-05	-0.04253	0	0	-9e-05	-6e-05	2e-05	0.00012	0.04249	-0.1302	0	0	0	0	0	0	0.18871	32	La3-H6-C12-N9-O15	0	0	equal_bothsteps	equal	0	Success at all eik	Success at all eik
468	IJECUV_FSR	0.04645	0.02087	0.0022	-0.04815	0.06725	-0.00103	-0.16281	0.38179	0.01396	-0.05528	0.00434	-0.03491	0.04774	-0.09546	-0.01247	0.02711	0.02927	-0.15496	0.43317	1	Li2-H16-C10-N2-O8	0	0	equal_bothsteps	equal	0	This sg doesnt have any	This sg doesnt have any
469	BOSJUQ_FSR	-6e-05	-0.00015	-0.0001	0.01497	0	0	-4e-05	-1e-05	-4e-05	0	0.00463	0	0	2e-05	-2e-05	0	0	0.01193	0.0149712	222	K4-H44-C32-S4-N8-O8	0	0	equal_bothsteps	equal	0	Success at all eik	This sg doesnt have any
470	BOVPUZ_FSR	9e-05	2e-05	-0.00019	-0.08982	-4e-05	0.00872	-0.00899	-0.11151	0.05898	0	-0.0979	0	-0.0001	-2e-05	-0.00037	0.0471	-0.00018	-0.08786	0.159932	2	Li2-H10-C14-N4-O14	0	0	equal_bothsteps	equal	0	Success at all eik	This sg doesnt have any
471	IFUKIE_FSR	0	0	0	0.02455	0	0	2e-05	-6e-05	6e-05	0	-0.00495	0	-3e-05	-2e-05	0	0	0	0.02783	0.02783	222	C24-H44-K4-N16-O20	0	0	equal_bothsteps	equal	0	Success at all eik	This sg doesnt have any
472	IFIVIF01_FSR	5e-05	-0.0001	4e-05	-0.00477	0	0.08646	0.04597	0.01414	-0.01664	0	-0.06756	0	-3e-05	-0.0001	-1e-05	-0.02818	1e-05	-0.0045	0.0866475	2	Li2-H32-C26-N2-O10	0	0	equal_bothsteps	equal	0	Success at all eik	This sg doesnt have any
473	OJENUO_FSR	0.00019	4e-05	8e-05	0	-0.05339	0	-6e-05	-1e-05	-1e-05	-0.02829	0	0	-0.00814	0.14815	0.02114	0	0	0	0.149872	mm2	C8-H4-K4-N8-O8	0	0	equal_bothsteps	equal	0	Success at all eik	This sg doesnt have any
474	NIGRIH_FSR	-0.00013	3e-05	6e-05	0.04563	-1e-05	-0.08917	-0.12742	0.15261	-0.05713	0	-0.01684	0	-0.00011	-4e-05	0.00015	-0.11028	-9e-05	0.01282	0.207541	2	Li2-H12-C20-N2-O8	0	0	equal_bothsteps	equal	0	Success at all eik	This sg doesnt have any
475	DOTWAL_FSR	-0.13964	0.1396	-4e-05	0	0	0	-0.00023	0.00032	3e-05	0	0	0.1414	0	0	-1e-05	0	0	0	0.197453	-6m2	La4-H36-C24-O36	0	0	equal_bothsteps	equal	0	Success at all eik	Success at all eik
476	EMUDAT_FSR	3e-05	0	1e-05	0.12237	0	0	0	3e-05	2e-05	0	0.12234	0	-1e-05	-1e-05	-1e-05	0	0	0.498	0.498	-42m	C56-H40-La4-N8-O40-Sr2	0	0	equal_bothsteps	equal	0	Success at all eik	Success at all eik
477	ASEMUG01_FSR	8e-05	-0.0001	0.00011	0.14919	0	0	0	0	0	0	0.16935	0	0	0	0	0	0	0.08443	0.16935	222	La4-H32-C24-N4-O28	0	0	equal_bothsteps	equal	0	Success at all eik	This sg doesnt have any
478	CUZJIR_FSR	2e-05	9e-05	-6e-05	0.00037	0	0	4e-05	0.00013	-0.00011	0	0.00028	0	-0.00034	9e-05	9e-05	0	0	0.00049	0.00061036	23	C48-H24-K4-O24-Sn4	0	0	equal_bothsteps	equal	0	Success at all eik	Success at all eik
479	KIYBEZ01_FSR	-0.18924	0.18655	-0.0004	0.05143	0	0	-0.00154	0.0013	1e-05	-3e-05	-0.05227	0.18472	1e-05	1e-05	1e-05	0	0	0	0.270676	32	K9-H12-C18-N9-O33	0	0	equal_bothsteps	equal	0	Success at all eik	Failed at e26
480	GIFGAG_FSR	-0.17746	-0.03758	-0.04986	0	-0.16034	0	-2e-05	0.00013	3e-05	-0.04886	9e-05	-0.05346	-0.05291	0.01391	0.06692	0	-0.06268	0	0.256085	m	Mn2-H32-C24-N8-O12	10	10	equal_bothsteps	equal	10	Success at all eik	This sg doesnt have any
481	MUQWIG_FSR	0.00013	0.00024	0.00075	-0.07787	0	0	-1e-05	-2e-05	0	0	-0.00296	0	0	-1e-05	-1e-05	0	0	-0.03985	0.0778741	222	Li4-H36-C56-O20	0	0	equal_bothsteps	equal	0	Success at all eik	This sg doesnt have any
482	MUQWUS_FSR	0.00031	0.00026	0.00043	0.02275	0	0	-1e-05	-1e-05	-1e-05	0	-0.00211	0	-1e-05	1e-05	2e-05	0	0	-0.00904	0.0227577	222	Li4-H32-C56-N4-O24	0	0	equal_bothsteps	equal	0	Success at all eik	This sg doesnt have any
483	DATYOM01_FSR	1e-05	-4e-05	-2e-05	-0.04359	0	0	0	-5e-05	-2e-05	0	-0.04364	0	2e-05	2e-05	-2e-05	0	0	0.0412	0.04364	-42m	Mn2-H32-C16-N4-O20	10	10	equal_bothsteps	equal	10	Success at all eik	Success at all eik
484	LICDOX01_FSR	-2e-05	2e-05	1e-05	0.00723	0	0	0	0	0	0	-0.00267	0	0	0	0	0	0	0.00464	0.00723006	222	Li4-H32-C16-Cl4-O8	0	0	equal_bothsteps	equal	0	Success at all eik	This sg doesnt have any
485	HEPNIA_FSR	-0.00011	3e-05	0	0.005	-0.11018	-2e-05	-0.00025	0.00014	-3e-05	-0.11015	-0.00497	-0.00025	0.01497	0.01497	-0.06258	0	0	0	0.110299	4	Li4-H32-C28-N16-Cl4-O16	0	0	equal_bothsteps	equal	0	Success at all eik	Success at all eik
486	XUNJUM_FSR	-0.08277	-0.04706	0.02134	0	-0.02788	0	0.00094	0.00124	-0.00034	-0.02638	0.00027	-0.00613	-0.25845	-0.06746	-0.15198	0	-0.13602	0	0.34462	m	C24-H28-Mn2-O8	10	10	equal_bothsteps	equal	10	Success at all eik	This sg doesnt have any
487	JUKXIY_FSR	-0.00025	0.00023	0.00023	-0.00485	0	0	0	0	0	0	-0.02591	0	0	-1e-05	-1e-05	0	0	-0.20882	0.20882	222	Mn2-H12-C24-N4-O8	2	2	equal_bothsteps	notequal	0	Success at all eik	This sg doesnt have any
488	AGALUR_FSR	-1e-05	4e-05	4e-05	0.16017	0	0	0	0	0	0	0.92619	0	0	-1e-05	0	0	0	-0.00782	0.92619	222	Mg4-H56-C24-O44	0	0	equal_bothsteps	equal	0	Success at all eik	This sg doesnt have any
489	SIWFOT_FSR	-3e-05	-1e-05	0	0	-0.0093	0	0	0	0	-0.04284	0	0	-0.11425	-0.13906	0.29034	0	0	0	0.341596	mm2	Li4-H32-C16-S4-Cl4-O8	0	0	equal_bothsteps	equal	0	Success at all eik	This sg doesnt have any
490	LICLPY02_FSR	-7e-05	-6e-05	-8e-05	-0.03352	0	0	0	0	1e-05	0	-0.01282	0	0	0	0	0	0	-0.01509	0.0335202	222	Li4-H20-C20-N4-Cl4	0	0	equal_bothsteps	equal	0	Success at all eik	This sg doesnt have any
491	UNISEQ02_FSR	-0.44812	-0.19243	-0.06315	0	0.09868	0	3e-05	-2e-05	8e-05	-0.00531	7e-05	-0.16232	0.11465	-0.04708	-0.01535	0	0.14605	0	0.504871	m	C8-H8-Li4-O12	0	0	equal_bothsteps	equal	0	Success at all eik	This sg doesnt have any
492	UNIRUF03_FSR	-0.0001	-5e-05	-8e-05	0.05632	1e-05	0.05397	-0.02682	0.02286	0.04888	0	-0.00063	0	-6e-05	-4e-05	-7e-05	-0.0526	1e-05	-0.02862	0.0975311	2	C8-H8-Li4-O12	0	0	equal_bothsteps	equal	0	Success at all eik	This sg doesnt have any
493	IFIVOL_FSR	0	0	0	0.02577	0	0	0	0	0	0	0.02785	0	1e-05	-1e-05	0	0	0	0.03854	0.03854	222	Li4-H56-C48-N4-O16	0	0	equal_bothsteps	equal	0	Success at all eik	This sg doesnt have any
494	IHUZAO_FSR	2e-05	-1e-05	7e-05	-0.00196	0	0	0	0	0	0	0.03707	0	0	0	0	0	0	0.0479	0.0479	222	Li4-B4-H16-C16-N8-F16	0	0	equal_bothsteps	equal	0	Success at all eik	This sg doesnt have any
495	UNIRUF01_FSR	-1e-05	0	7e-05	0.13099	0	0	-0.00014	5e-05	0	0	-0.02623	0	-1e-05	0	-1e-05	0	0	-0.02086	0.13099	222	C8-H8-Li4-O12	0	0	equal_bothsteps	equal	0	Success at all eik	This sg doesnt have any
496	NIRCUO_FSR	5e-05	-8e-05	8e-05	-0.02303	0	0	-0.00018	0.00018	6e-05	0	-0.01779	0	-1e-05	0	0	0	0	0.02935	0.02935	222	C16-H20-Li8-O26	0	0	equal_bothsteps	equal	0	Success at all eik	This sg doesnt have any
497	XECSUV_FSR	0.0002	0.00016	0.00013	0	0.01803	0	0.00036	0.00042	0.00022	-0.21395	0	0	0.03478	-0.06026	-0.03185	0	0	0	0.213951	mm2	Li4-H20-C20-N8-O12	0	0	equal_bothsteps	equal	0	Success at all eik	This sg doesnt have any
498	NEZQAN_FSR	-0.07055	0.07082	0.00019	0.05559	-0.00762	-0.01046	-0.00804	0.00797	-6e-05	-0.00664	-0.05532	0.07236	0.00775	0.00775	-0.06733	0	0	0	0.115275	3	Li6-H36-C27-O15	0	0	equal_bothsteps	equal	0	Success at all eik	Success at all eik
499	RUTVUA_FSR	-0.19797	0.19802	-1e-05	-0.09004	0	0	-0.0002	0.00015	-1e-05	-0.00018	0.08992	0.1981	0	0	0	0	0	0	0.294128	32	Mg3-H12-C24-O21	0	0	equal_bothsteps	equal	0	Success at all eik	Success at all eik
500	LICSUM_FSR	3e-05	-1e-05	1e-05	-0.14434	0	0	-1e-05	8e-05	-0.00014	0	-0.14019	0	-5e-05	-0.00018	-5e-05	0	0	-0.00257	0.14434	222	Mg4-H24-C16-O24	0	0	equal_bothsteps	equal	0	Success at all eik	This sg doesnt have any
501	CINCEI_FSR	-0.20626	0.20824	-4e-05	-0.00712	0	0	-0.00303	0.00394	-0.00014	-0.00273	0.00737	0.20663	4e-05	4e-05	-0.00012	0	0	0	0.29327	32	Li3-H9-C21-N6-O18	0	0	equal_bothsteps	equal	0	Success at all eik	Success at all eik
502	PEKCOX01_FSR	-0.0002	0.00017	3e-05	-0.01296	0	0	0	0	0	0	-0.0251	0	0	0	0	0	0	-0.08767	0.08767	222	Li4-H32-C20-N4-O16	0	0	equal_bothsteps	equal	0	Success at all eik	This sg doesnt have any
503	FENSUN_FSR	0.00019	0.00014	-0.00022	-0.09558	-0.00018	-0.01188	0.03302	0.16796	-0.09734	0	-0.13335	0	-0.00025	-0.00026	0.00015	0.00318	0.00021	-0.01346	0.23782	2	Mn2-H8-C10-N4-O10	10	10	equal_bothsteps	equal	10	Success at all eik	This sg doesnt have any
504	AJAXOY_FSR	-1e-05	-0.00019	-0.00018	0	-0.04309	0	1e-05	1e-05	1e-05	0.0232	0	0	0.03221	0.0055	-0.06189	0	0	0	0.0699867	mm2	Mg4-H24-C32-O20	0	0	equal_bothsteps	equal	0	Success at all eik	This sg doesnt have any
505	EGIROD_FSR	-0.22	-0.06073	0.0227	0	0.18027	0	-0.00017	2e-05	0.00021	0.13379	-0.00018	-0.0448	0.08895	0.19747	0.26498	0	-0.08428	0	0.387111	m	C12-H14-Mn2-N18-O10	2	2	equal_bothsteps	notequal	10	Success at all eik	This sg doesnt have any
506	LOTSUL01_FSR	-0.08329	0.08339	-7e-05	0.03189	0	0	0.00037	-0.00049	4e-05	-0.00036	-0.0319	0.08333	0	0	1e-05	0	0	0	0.122103	32	Mg3-H12-C21-O15	0	0	equal_bothsteps	equal	0	Success at all eik	Success at all eik
507	GEWKAW_FSR	-5e-05	0.00011	-5e-05	0.08077	0	0	2e-05	1e-05	0	0	0.07047	0	-7e-05	-3e-05	1e-05	0	0	0.03882	0.0807701	222	Mg2-H28-C24-N4-O16	0	0	equal_bothsteps	equal	0	Success at all eik	This sg doesnt have any
508	SIKROU_FSR	-9e-05	0.00558	0.00643	0.02188	-0.00136	0.00317	-2e-05	-0.00086	0.00018	0.00036	0.06506	0.00011	-0.00421	-0.004	0.00097	-2e-05	0.00137	0.12123	0.121424	222	Mg4-H36-C12-S4-N4-O28	0	0	equal_bothsteps	equal	0	Failed at e35	This sg doesnt have any
509	IXUXAC_FSR	0.00021	0.00016	0.00029	0	-0.12794	0	-7e-05	-0.00015	-0.0001	0.2067	0	0	-0.08109	0.16246	0.01843	0	0	0	0.2067	mm2	C24-H16-Li8-N8-O16	0	0	equal_bothsteps	equal	0	Success at all eik	This sg doesnt have any
510	OVUNOJ_FSR	0	0	0	0.01754	0	0	0	0	0	0	-0.0091	0	0	0	0	0	0	0.04686	0.04686	222	Li4-H60-C48-N24	0	0	equal_bothsteps	equal	0	Success at all eik	This sg doesnt have any
511	XUNTEH_FSR	4e-05	6e-05	3e-05	0	-0.01554	0	-0.0001	-0.00016	-2e-05	-0.05919	0	0	-0.02477	-0.10465	0.05742	0	0	0	0.121911	mm2	Li4-H16-C24-N4-O8	0	0	equal_bothsteps	equal	0	Success at all eik	This sg doesnt have any
512	PIHSAB_FSR	-6e-05	-4e-05	3e-05	-0.04281	0	0	-5e-05	1e-05	-0.0001	0	0.13067	0	4e-05	2e-05	-2e-05	0	0	0.09777	0.13067	222	C8-H8-Mg2-O12	0	0	equal_bothsteps	equal	0	Success at all eik	This sg doesnt have any
513	MISKOR_FSR	2e-05	4e-05	-2e-05	-0.10602	0	0	0	0	0	0	-0.04653	0	0	0	0	0	0	-0.04781	0.10602	222	Li4-H36-C20-N4-Cl4-O8	0	0	equal_bothsteps	equal	0	Success at all eik	This sg doesnt have any
514	MISKAD_FSR	-1e-05	2e-05	-4e-05	-0.08284	0	0	0	0	0	0	-0.03016	0	0	0	0	0	0	-0.05744	0.08284	222	Li4-H36-C20-I4-N4-O8	0	0	equal_bothsteps	equal	0	Success at all eik	This sg doesnt have any
515	HEFXIZ_FSR	5e-05	-6e-05	0.00014	0.03421	1e-05	-0.03936	-0.03655	0.1752	-0.10476	0	0.06178	0	1e-05	-7e-05	0.00019	-0.08534	6e-05	-0.0012	0.216385	2	Li2-H14-C8-N4-O6	0	0	equal_bothsteps	equal	0	Success at all eik	This sg doesnt have any
516	HEFXAR_FSR	-2e-05	0.00014	3e-05	-0.03236	0	0	-9e-05	0.00011	3e-05	0	-0.05287	0	-8e-05	5e-05	0	0	0	0.08206	0.0820601	222	Li4-H16-C8-N4-O8	0	0	equal_bothsteps	equal	0	Success at all eik	This sg doesnt have any
517	MISKUX_FSR	1e-05	2e-05	-4e-05	-0.08728	0	0	0	0	0	0	-0.04829	0	0	0	0	0	0	-0.06441	0.08728	222	Li4-H36-C20-Br4-N4-O8	0	0	equal_bothsteps	equal	0	Success at all eik	This sg doesnt have any
518	PIHRUU_FSR	0	3e-05	-3e-05	-0.04098	0	0	4e-05	0	3e-05	0	-0.05004	0	0	0	0	0	0	-0.14893	0.14893	222	C8-H8-Mg2-O12	0	0	equal_bothsteps	equal	0	Success at all eik	This sg doesnt have any
519	DODGUY_FSR	-0.00011	8e-05	0.00024	-0.00575	0	0	1e-05	0	2e-05	0	0.03362	0	1e-05	0	-1e-05	0	0	0.04604	0.04604	222	Li4-H32-C36-N4-O16	0	0	equal_bothsteps	equal	0	Success at all eik	This sg doesnt have any
520	SADRUM_FSR	-0.12027	-0.08005	0.01249	0.00375	0.10189	0.00086	-0.00063	-0.00013	0.00219	0.18301	0.00295	0.06567	0.07217	0.10426	0.14969	-0.0026	-0.04575	-0.00308	0.237558	m	C18-H22-Mn2-N2-O20	10	10	equal_bothsteps	notequal	0	Failed at e36	This sg doesnt have any
521	FARCAC_FSR	-2e-05	3e-05	0.00013	0.032	0	0	0	0	0	0	-0.01922	0	0	0	0	0	0	0.06226	0.06226	222	Mg4-H36-C16-N4-O24	0	0	equal_bothsteps	equal	0	Success at all eik	This sg doesnt have any
522	MOXKUG_FSR	0	0	2e-05	0.07188	-0.0012	1e-05	-6e-05	4e-05	-2e-05	0.00122	0.07188	1e-05	-0.03183	0.0319	4e-05	0	0	0.03496	0.0719002	-4	B1-C16-H20-Li1-N8	0	0	equal_bothsteps	equal	0	Success at all eik	Success at all eik
523	SIMZOD02_FSR	-0.19706	-0.21294	0.09464	0.00373	0.08533	0.22482	0.22891	0.08052	-0.23421	-0.15699	0.05085	-0.20541	-0.00771	-0.27966	-0.34484	-0.29765	0.18484	0.10202	0.611934	1	Li1-H5-C5-N2-O5	0	0	equal_bothsteps	equal	0	This sg doesnt have any	This sg doesnt have any
524	DULVEM_FSR	-0.36269	-0.15369	-0.08986	0	0.03217	0	1e-05	-0.0001	-3e-05	-0.01295	2e-05	-0.1821	-0.00439	-0.02384	0.12082	0	-0.1508	0	0.406366	m	C18-H16-Mg2-N4-O12	0	0	equal_bothsteps	equal	0	Success at all eik	This sg doesnt have any
525	CIJZIG_FSR	0	0	-1e-05	0.03657	0	-0.0261	0.02357	0.13688	0.20388	0	-0.00528	0	0	0	0	0.01569	0	0.02993	0.246752	2	Mn2-H20-C12-O10	10	10	equal_bothsteps	equal	10	Success at all eik	This sg doesnt have any
526	MUQWOM_FSR	-3e-05	1e-05	0.00012	-0.03057	0	0	0	-4e-05	-6e-05	0	-0.00963	0	0	2e-05	6e-05	0	0	-0.00728	0.0305703	222	Li4-H28-C56-O16	0	0	equal_bothsteps	equal	0	Success at all eik	This sg doesnt have any
527	BERROH_FSR	-0.06128	-0.17737	0.07024	0	0.02068	0	7e-05	-1e-05	-4e-05	0.00583	5e-05	-0.10007	-0.00074	0.095	0.02883	0	-0.00104	0	0.215749	m	C16-H24-Mn2-N20-O4	10	10	equal_bothsteps	equal	10	Success at all eik	This sg doesnt have any
528	IJAZIC_FSR	0	0	0	0.0253	0	0	0	0	0	0	0.02383	0	0	0	0	0	0	-0.01282	0.0253	222	Li4-H64-C40-N4	0	0	equal_bothsteps	equal	0	Success at all eik	This sg doesnt have any
529	NEPRUX_FSR	-0.0006	-0.00251	-0.00019	0.07174	-7e-05	0.03712	0.0315	-0.08271	0.0025	0	0.04507	0	3e-05	-8e-05	0	-0.00927	-4e-05	0.0453	0.0994057	2	Li4-H6-C12-N6-O14	0	0	equal_bothsteps	equal	0	Success at all eik	This sg doesnt have any
530	CODFEH_FSR	1e-05	-1e-05	0	0.01429	0.14684	7e-05	-1e-05	1e-05	0	0.14684	-0.01429	-7e-05	0.04008	0.04008	-0.26816	0	0	0	0.274085	4	Mn4-H32-C16-O28	20	20	equal_bothsteps	equal	20	Success at all eik	Success at all eik
531	XAMWIR_FSR	-1e-05	-4e-05	-8e-05	-0.06911	-5e-05	-0.0256	-0.04663	-0.01256	0.02572	0	-0.03936	0	-1e-05	1e-05	5e-05	0.01556	0	-0.00194	0.0750138	2	Na2-H28-C24-S4-N6-O22	0	0	equal_bothsteps	equal	0	Success at all eik	This sg doesnt have any
532	HEYQIO_FSR	-2e-05	-5e-05	-7e-05	0.04061	-2e-05	-0.05322	0.03297	0.06919	-0.03575	0	-0.04258	0	2e-05	0	2e-05	0.00219	-4e-05	-0.04739	0.0946858	2	Na2-H32-C26-S2-N2-O8	0	0	equal_bothsteps	equal	0	Success at all eik	This sg doesnt have any
533	UPIYAU_FSR	0.00023	-3e-05	-0.00016	-0.051	3e-05	0.06746	0.16201	0.22403	-0.0036	0	0.05924	0	6e-05	-5e-05	-9e-05	0.02276	5e-05	0.12124	0.28277	2	Mn4-H20-C16-O26	20	20	equal_bothsteps	notequal	10	Success at all eik	This sg doesnt have any
534	HIVQAG_FSR	2e-05	1e-05	3e-05	0.0286	1e-05	0.00078	0.01802	-0.00703	-0.01886	0	0.00563	0	-2e-05	-2e-05	-1e-05	-0.01253	0	-0.002	0.0312613	2	Mn4-H32-C48-N8-O16	20	10	notequal_bothsteps	equal	20	Success at all eik	This sg doesnt have any
535	ODOSEI_FSR	2e-05	-1e-05	3e-05	-0.0612	0	-0.07654	-0.08496	-0.18272	0.0971	0	-0.09285	0	0	1e-05	-2e-05	0.04798	3e-05	-0.07189	0.242187	2	Na2-H26-C12-S2-O18	0	0	equal_bothsteps	equal	0	Success at all eik	This sg doesnt have any
536	VETBAA_FSR	0.0852	0.18935	0.2035	0	-0.00097	0	0.00013	-0.00129	0.00077	0.01922	0.00023	0.06973	0.04338	-0.0968	-0.24588	0	0.05947	0	0.380499	m	C40-H30-Mn2-N10-O14	2	2	equal_bothsteps	notequal	10	Success at all eik	This sg doesnt have any
537	MAKYOM02_FSR	-0.00014	1e-05	0.00011	-0.00577	4e-05	0.14584	0.0155	-0.23542	0.05724	0	0.02927	0	0.00012	-0.0001	9e-05	-0.1159	1e-05	-0.09077	0.244532	2	C24-H16-Mo3-N4-O9	0	0	equal_bothsteps	equal	0	Success at all eik	This sg doesnt have any
538	XOHTEU_FSR	0.04803	0.03038	0.06298	0.05045	0.01656	0.02146	0.01788	0.00944	0.05953	0.07622	0.01754	0.01684	0.03454	0.04514	-0.0571	0.06321	-0.05126	-0.00053	0.143344	1	Mn1-H22-C28-O12	5	5	equal_bothsteps	equal	5	This sg doesnt have any	This sg doesnt have any
539	MICDOR_FSR	-4e-05	-1e-05	0	0	0.13877	0	0.00017	3e-05	0	0.16896	0	0	0.14977	0.16779	-0.56026	0	0	0	0.603718	mm2	C6-H20-Mn4-N4-Se4	20	20	equal_bothsteps	equal	20	Success at all eik	This sg doesnt have any
540	TEKDUI01_FSR	0	0	0	-0.0472	0	0.06574	0.17261	0.2306	-0.0022	0	0.06305	0	0	0	0	0.0277	0	0.11933	0.294874	2	Mn4-H20-C16-O26	20	20	equal_bothsteps	notequal	10	Success at all eik	This sg doesnt have any
541	OWOSUQ_FSR	0	0	0	-0.0217	0	-0.01303	0.01232	-0.02821	0.01401	0	-0.03221	0	0	0	0	0.07445	0	-0.0392	0.0852275	2	Na2-H40-C26-S2-N2-O20	0	0	equal_bothsteps	equal	0	Success at all eik	This sg doesnt have any
542	OGUVOC_FSR	0.49702	0.51231	0.45766	0	0.05479	0	7e-05	0.00012	0.00011	-0.00968	1e-05	0.03854	0.34012	0.41428	0.61326	0	0.1731	0	1.17441	m	C32-H28-Mo6-N12-Ni2-O20	4	4	equal_bothsteps	notequal	0	Success at all eik	This sg doesnt have any
543	MNGLUD_FSR	0.28582	0.14661	0.14945	0.01262	0.0029	0.05863	0.15774	-0.00077	-0.02359	0.04758	0.00092	0.05895	0.05744	-0.00099	0.09015	-0.04323	0.05324	-0.03104	0.390278	1	Mn1-H26-C12-O16	1	1	equal_bothsteps	notequal	5	This sg doesnt have any	This sg doesnt have any
544	GISWOX_FSR	-3e-05	-4e-05	1e-05	0.00712	0	0.09493	0.18876	0.17444	0.14937	0	0.01882	0	5e-05	6e-05	0	0.03464	0	-0.02771	0.297868	2	Mn2-H40-C40-N10-O4	4	4	equal_bothsteps	notequal	0	Success at all eik	This sg doesnt have any
545	SEJSOQ_FSR	-6e-05	-4e-05	-7e-05	-0.06381	0	0	8e-05	1e-05	9e-05	0	0.04985	0	-4e-05	-1e-05	1e-05	0	0	0.083	0.083	222	Mn4-H24-C16-O24	20	20	equal_bothsteps	equal	20	Success at all eik	This sg doesnt have any
546	DENGAH_FSR	0.00081	-0.00026	0.00207	0.25313	0	0	0.00036	-0.00134	-0.00085	0	0.32483	0	0.00424	-0.00288	0.00852	0	0	0.0047	0.324834	222	Mn4-H16-C24-N8-O16	4	4	equal_bothsteps	notequal	20	Success at all eik	This sg doesnt have any
547	WUXMOR02_FSR	-0.00035	-0.00158	0.00103	0.00306	0	0	8e-05	0.00111	0.00118	0	0.00017	0	0	3e-05	0	0	0	0.04674	0.04674	222	C10-F3-H8-Mn1-N2	4	4	equal_bothsteps	equal	4	Success at all eik	This sg doesnt have any
548	OZEPIT_FSR	0.0027	0.00052	0.00221	-0.05223	0.00127	-0.0032	0.0965	-0.01868	0.00126	0	-0.0021	0	0.00025	-2e-05	0.00041	0.0001	-0.00011	-0.0495	0.0983688	2	C46-F12-H30-Mn2-N2-O8	10	10	equal_bothsteps	equal	10	Success at all eik	This sg doesnt have any
549	LALKEP_FSR	-1e-05	0	1e-05	0	0.09149	0	6e-05	-0.00016	-0.00023	-0.04638	0	0	0.0086	-0.04946	-0.3184	0	0	0	0.322333	mm2	Mn4-H12-C28-N4-O16	20	20	equal_bothsteps	equal	20	Success at all eik	This sg doesnt have any
550	HUSPUH_FSR	-5e-05	2e-05	2e-05	0.01591	0	0	-4e-05	1e-05	2e-05	0	-0.00364	0	-3e-05	-0.00011	-0.00014	0	0	0.00924	0.0159101	222	Mo8-H40-C28-N24-O24	0	0	equal_bothsteps	equal	0	Success at all eik	This sg doesnt have any
551	ANAMOT_FSR	2e-05	1e-05	-5e-05	0.00041	0	0	0	1e-05	0	0	0.02655	0	0	0	0	0	0	0.03566	0.03566	222	Mn4-H48-C32-S8-N8-O16	20	20	equal_bothsteps	equal	20	Success at all eik	This sg doesnt have any
552	IXUDAI_FSR	-4e-05	-5e-05	7e-05	-0.0002	-0.09017	0.04982	0.04887	-0.04924	0.00042	-0.09004	0	0	-0.13399	-0.13399	-0.27999	0	0	0	0.338084	3m	B2-C12-H8-N24-Na2-O12	0	0	equal_bothsteps	equal	0	Success at all eik	Success at all eik
553	KUQNOA_FSR	0.15419	0.03123	0.17363	0.04314	0.05175	0.00218	0.1376	-0.01591	-0.09679	0.02884	-0.01725	-0.0243	0.01487	-0.11444	0.08462	-0.06884	0.13937	-0.00442	0.266874	1	Na2-H40-C24-N8-O19	0	0	equal_bothsteps	equal	0	This sg doesnt have any	This sg doesnt have any
554	VIWFOW_FSR	0	0	0	0.03643	0	-0.12594	-0.07094	-0.02744	-0.09954	0	-0.00749	0	0	1e-05	4e-05	-0.09873	3e-05	0.01459	0.141776	2	Na2-H20-C10-N2-O10	0	0	equal_bothsteps	equal	0	Success at all eik	This sg doesnt have any
555	QIBZAD_FSR	-1e-05	0	0	0.00374	0	0	0	0	0	0	-0.06486	0	1e-05	0	0	0	0	-0.00372	0.06486	222	C40-H32-Mn2-N8-S12	2	2	equal_bothsteps	notequal	0	Success at all eik	This sg doesnt have any
556	TARDOF_FSR	-1e-05	-3e-05	-3e-05	0	-0.00617	0	3e-05	-0.00022	4e-05	0.37975	0	0	-0.03046	0.33535	-0.15131	0	0	0	0.379751	mm2	C12-H16-N2-Na2-O10	0	0	equal_bothsteps	equal	0	Success at all eik	This sg doesnt have any
557	BOHGOU_FSR	-0.02716	-0.12414	-0.09251	0	0.10312	0	-2e-05	-0.00011	1e-05	-0.03295	1e-05	-0.16709	-0.1939	-0.11409	0.06075	0	-0.02569	0	0.244975	m	C8-H12-Mn2-O12	10	10	equal_bothsteps	equal	10	Success at all eik	This sg doesnt have any
558	ZIFNUA_FSR	2e-05	-9e-05	3e-05	0.03283	0	0	6e-05	-0.00012	-6e-05	0	-0.03284	0	1e-05	1e-05	-7e-05	0	0	0	0.0328403	422	C44-H36-Mn4-N8-O20	20	20	equal_bothsteps	equal	20	Success at all eik	Success at all eik
559	VEWKEQ_FSR	0.17767	0.06437	-0.06407	0.05784	0.00455	0.02994	0.02919	0.07281	0.08127	0.03969	0.10123	-0.02907	-0.05427	-0.02027	-0.01241	0.03112	-0.03144	0.02671	0.219719	1	Mn1-H19-C23-N5-O5	5	5	equal_bothsteps	equal	5	This sg doesnt have any	This sg doesnt have any
560	IPOYAN_FSR	-2e-05	-4e-05	-2e-05	0.03512	-1e-05	0.03675	0.07216	0.16618	-0.02687	0	0.04169	0	-7e-05	-0.00015	-0.0003	-0.00053	-8e-05	0.0219	0.187838	2	Na2-H10-C14-O6	0	0	equal_bothsteps	equal	0	Success at all eik	This sg doesnt have any
561	WADHAL01_FSR	-5e-05	-0.0001	0	-0.0034	0	0	0	0	0	0	0.05316	0	0	0	0	0	0	-0.00647	0.05316	222	Mn4-H32-C24-O32	20	20	equal_bothsteps	equal	20	Success at all eik	This sg doesnt have any
562	ESUMOU_FSR	5e-05	0.00015	6e-05	0.0606	0	0	-0.00015	0.00044	-7e-05	0	-0.0359	0	8e-05	3e-05	1e-05	0	0	0.04799	0.0606002	222	Mn4-H24-C16-O24	20	20	equal_bothsteps	equal	20	Success at all eik	This sg doesnt have any
563	ESIQUS_FSR	-0.00023	-4e-05	-0.00011	-0.02457	-0.0001	-0.01759	0.10655	-0.0939	0.03044	0	0.00838	0	-0.00012	-2e-05	-0.0003	0.01351	-0.00015	-0.04123	0.145489	2	C24-H22-Mn3-N28	15	11	notequal_bothsteps	equal	15	Success at all eik	This sg doesnt have any
564	ROJQEM01_FSR	-6e-05	-2e-05	0	-0.03038	0	0	0	0	0	0	-0.03473	0	0	0	0	0	0	0.02667	0.03473	222	Mn4-H36-C20-N4-Cl8-O8	20	20	equal_bothsteps	equal	20	Success at all eik	This sg doesnt have any
565	UBUQAM_FSR	-3e-05	5e-05	4e-05	-0.05033	-4e-05	-0.09072	-0.32169	-0.32928	0.07595	0	0.13228	0	0	-7e-05	-4e-05	-0.06354	4e-05	0.00297	0.48495	2	Na2-H20-C10-Cl2-O10	0	0	equal_bothsteps	equal	0	Success at all eik	This sg doesnt have any
566	DENFUA_FSR	-0.00617	0.00231	-0.01154	-0.52695	0	0	-1e-05	0	-2e-05	0	0.11202	0	1e-05	1e-05	2e-05	0	0	-0.16017	0.527118	222	Mn4-H12-C20-N20-O8	4	4	equal_bothsteps	notequal	20	Success at all eik	This sg doesnt have any
567	VIDNII_FSR	0	-1e-05	0	-0.0739	0	-0.0225	0.13793	0.02291	-0.02583	0	-0.02795	0	0	-1e-05	0	0.05769	0	0.05187	0.144907	2	Mn2-H30-C48-N4-O10	10	10	equal_bothsteps	notequal	0	Success at all eik	This sg doesnt have any
568	GELVEZ02_FSR	0.28588	-0.28447	0.00125	-0.03357	0	0	-0.00066	-0.00098	-0.00128	0.00013	0.03349	-0.28592	-0.00011	-0.00011	-0.00029	0	0	0	0.404696	32	Mn3-H12-C21-O15	0	3	notequal_bothsteps	notequal	5	Success at all eik	Success at all eik
569	LIWMOU_FSR	1e-05	0	0	0	-0.0433	0	-0.00012	-0.00021	-2e-05	-0.02542	0	0	-0.0828	-0.2585	-0.05338	0	0	0	0.276636	mm2	Mn4-H36-C28-N4-O28	20	20	equal_bothsteps	notequal	10	Success at all eik	This sg doesnt have any
570	VAFYOQ_FSR	-0.37088	-0.15471	0.23719	0	-0.00831	0	1e-05	7e-05	4e-05	0.01724	-1e-05	-0.32841	0.35524	0.37521	-1.39263	0	-0.07411	0	1.52942	m	C20-H16-Mo2-N4-O6	0	0	equal_bothsteps	equal	0	Success at all eik	This sg doesnt have any
571	MNMLTH_FSR	9e-05	9e-05	0.00017	0.02589	0	0	-1e-05	-3e-05	-2e-05	0	0.09188	0	2e-05	3e-05	8e-05	0	0	0.03805	0.09188	222	Mn4-H32-C16-O28	20	20	equal_bothsteps	equal	20	Success at all eik	This sg doesnt have any
572	HAQQIC_FSR	-3e-05	0	-4e-05	0.01192	0	0	3e-05	-3e-05	1e-05	0	-0.01216	0	7e-05	-2e-05	-0.00012	0	0	-0.01576	0.0157606	222	C44-H52-Mo4-N12-O12	0	0	equal_bothsteps	equal	0	Success at all eik	This sg doesnt have any
573	YIJLOV_FSR	-0.42872	0.00953	-0.18727	0.01155	-0.03155	-0.02834	-0.06251	-0.04863	-0.04923	-0.05424	0.00326	-0.0419	-0.12668	0.00405	-0.05595	-0.06454	-0.16793	0.02397	0.501419	m	C38-H32-Mn2-N4-O16	2	0	notequal_bothsteps	notequal	0	Failed at e36	This sg doesnt have any
574	ERIVEI_FSR	0.00238	0.00999	0.00601	0	-0.16915	0	-1e-05	-2e-05	-1e-05	-0.08022	0	0	-0.02974	-0.0711	-0.05588	0	0	0	0.169754	mm2	C76-H44-Mn2-N8-O8	2	2	equal_bothsteps	equal	2	Success at all eik	This sg doesnt have any
575	EZUREW_FSR	-0.0662	0.23238	0.02975	0	0.06821	0	-6e-05	9e-05	-1e-05	-0.00509	1e-05	0.05838	0.06216	0.00612	0.08286	0	-0.14692	0	0.258759	m	C20-H16-Mo2-N4-O10-V2	2	2	equal_bothsteps	notequal	0	Success at all eik	This sg doesnt have any
576	JOCNUN_FSR	0.02768	-0.39966	-0.21981	0	0.08378	0	-0.00144	-0.00265	0.00015	0.76017	-0.00092	0.32098	0.0958	-0.03266	0.16106	0	0.0547	0	0.825166	m	C40-H34-Mn2-N14-O14	10	10	equal_bothsteps	equal	10	Success at all eik	This sg doesnt have any
577	VEWJOZ_FSR	0.2013	0.02711	-0.07913	-0.0028	-0.01561	0.0104	0.008	0.12614	-0.07107	0.01734	-0.01936	-0.00593	0.00829	-0.03738	-0.04339	-0.00579	-0.06159	0.02146	0.228699	1	Mn1-H19-C23-N3-O8	5	5	equal_bothsteps	equal	5	This sg doesnt have any	This sg doesnt have any
578	GELVEZ01_FSR	-0.09203	0.09207	-3e-05	-0.04482	0	0	-0.0009	0.00101	-0.00014	-0.00039	0.04632	0.09257	-1e-05	-1e-05	1e-05	0	0	0	0.137694	32	Mn6-H24-C42-O30	30	30	equal_bothsteps	equal	30	Success at all eik	Success at all eik
579	INAKIT_FSR	0.15732	0.02671	0.08208	0	0.06666	0	0	1e-05	0	-0.03389	0	0.00938	0.05266	0.07528	0.1364	0	0.12699	0	0.264653	m	C30-H32-N12-Ni2-O8	4	4	equal_bothsteps	equal	4	Success at all eik	This sg doesnt have any
580	UKEWIR_FSR	-1e-05	0.0001	0	-0.00792	0	0	-0.0003	-1e-05	-2e-05	0	0.01492	0	-6e-05	-0.00011	3e-05	0	0	0.0229	0.0229004	222	C24-H24-Na2-O24-Y2	0	0	equal_bothsteps	equal	0	Success at all eik	This sg doesnt have any
581	BEHWIU_FSR	-6e-05	5e-05	-2e-05	-0.00569	0	-0.03947	-0.03029	-0.03473	0.03004	0	-0.00997	0	6e-05	-1e-05	5e-05	0.01317	1e-05	0.01528	0.0559058	2	Na2-H42-C46-S2-N4-O12	0	0	equal_bothsteps	equal	0	Success at all eik	This sg doesnt have any
582	JAHKIP_FSR	-3e-05	0	0	0.02021	0	0.03989	0.07873	-0.03487	-0.007	0	0.01008	0	-1e-05	0	0	0.05156	-1e-05	-0.01601	0.0869766	2	Na2-H54-C46-S2-N6-Cl2-O10	0	0	equal_bothsteps	equal	0	Success at all eik	This sg doesnt have any
583	COQYUD_FSR	-0.06983	0.00373	-0.13736	0	0.04666	0	-2e-05	0	-1e-05	-0.03562	0	-0.04646	-0.09169	0.00575	-0.07031	0	-0.04326	0	0.188781	m	C28-H40-N4-Na2-O4-P2	0	0	equal_bothsteps	equal	0	Success at all eik	This sg doesnt have any
584	TAPXIT01_FSR	-2e-05	-1e-05	0	0	-0.01939	0	-0.00011	-5e-05	-6e-05	-0.04637	0	0	0.07122	0.0236	0.23035	0	0	0	0.242261	mm2	C56-H32-Na2-O20-Yb2	0	0	equal_bothsteps	equal	0	Success at all eik	This sg doesnt have any
585	NAWYOA_FSR	2e-05	-5e-05	-7e-05	-0.06372	0	0	-5e-05	-2e-05	0.00013	0	0.00988	0	1e-05	-2e-05	-6e-05	0	0	0.08359	0.08359	222	Na4-H44-C16-N72-O12	0	0	equal_bothsteps	equal	0	Success at all eik	This sg doesnt have any
586	WIHCUM_FSR	-0.03758	0.05205	-0.0203	0	-0.01795	0	1e-05	0	0	0.01517	0	-0.00608	-0.02062	0.04442	0.0201	0	-0.00548	0	0.0824614	m	Na4-H24-C8-S8-O16	0	0	equal_bothsteps	equal	0	Success at all eik	This sg doesnt have any
587	WOFBAV_FSR	-3e-05	1e-05	-1e-05	-3e-05	0.0507	0.17326	0.1732	-0.17339	-0.00015	0.05086	0	0	0.00145	0.00145	-0.21512	0	0	0	0.250298	3m	C12-H24-N14-Na6-O18	0	0	equal_bothsteps	equal	0	Success at all eik	Success at all eik
588	EMOTAC_FSR	6e-05	0.00014	-7e-05	-0.02886	0	-0.02379	-0.04783	-0.12556	0.0251	0	-0.01363	0	-1e-05	6e-05	-6e-05	-0.01719	2e-05	-0.06371	0.137364	2	Ni2-H24-C20-N4-O10	4	4	equal_bothsteps	equal	4	Success at all eik	This sg doesnt have any
589	CISLIB_FSR	0.00548	-0.06443	0.11569	0	0.01814	0	0.00026	-0.00067	-0.00047	-0.01946	-0.00013	-0.11537	0.15013	0.01267	0.02247	0	0.13482	0	0.205964	m	C2-H6-N1-Na3-O10-S2	0	0	equal_bothsteps	equal	0	Success at all eik	This sg doesnt have any
590	UWEMEQ_FSR	-0.07317	0.00419	0.10301	0	-0.03535	0	-3e-05	-2e-05	8e-05	-0.00105	8e-05	-0.04972	0.15148	0.09354	0.33504	0	-0.07678	0	0.393644	m	Na2-H12-C6-N18-O6	0	0	equal_bothsteps	equal	0	Success at all eik	This sg doesnt have any
591	NAHNLA10_FSR	-6e-05	-9e-05	4e-05	-0.09572	0	0	8e-05	-4e-05	-5e-05	0	-0.09575	0	-6e-05	7e-05	-6e-05	0	0	-0.09571	0.0957501	23	Na8-H28-C24-N4-O24	0	0	equal_bothsteps	equal	0	Success at all eik	Success at all eik
592	RESSAK_FSR	-0.00082	-0.00063	-0.00067	-0.03655	0.00025	-0.04609	-0.08358	-0.06692	-0.02682	0	-0.0139	0	-0.00023	-0.00049	-0.0006	-0.00422	-0.00016	0.01043	0.111259	2	C36-H26-N4-Ni2-O10-S1	4	4	equal_bothsteps	equal	4	Success at all eik	This sg doesnt have any
593	FICNEK01_FSR	-0.00047	0.00022	0.00033	-0.087	0	0	0.0007	-0.00063	-0.00011	0	-0.08681	0	0.00026	0.00032	-0.00049	0	0	-0.08702	0.0870224	23	Na4-H24-Pb4-C24-N4-O24	0	0	equal_bothsteps	equal	0	Success at all eik	Success at all eik
594	UFATEA01_FSR	2e-05	7e-05	2e-05	0	0.02624	0	2e-05	1e-05	2e-05	0.05687	0	0	0.00384	0.07527	0.07239	0	0	0	0.104502	mm2	Ni2-H16-C24-N4-O8	4	4	equal_bothsteps	equal	4	Success at all eik	This sg doesnt have any
595	VIWYUW_FSR	-4e-05	5e-05	0.00027	-0.08719	0	0	0.00037	-7e-05	-6e-05	0	-0.08716	0	-1e-05	0.00029	-3e-05	0	0	-0.08712	0.0871904	23	Na4-Sr4-H24-C24-N4-O24	0	0	equal_bothsteps	equal	0	Success at all eik	Success at all eik
596	IWECIY_FSR	0	0	0	0.05305	0	0.01969	0.02625	0.00311	0.012	0	0.07842	0	0	1e-05	0	0.05888	0	0.04684	0.0930589	2	Ni2-H44-C44-N8-O18	0	0	equal_bothsteps	equal	0	Success at all eik	This sg doesnt have any
597	IFUJID_FSR	8e-05	-2e-05	3e-05	0	-0.02964	0	6e-05	4e-05	-1e-05	-0.00417	0	0	-0.02666	-0.03833	0.02483	0	0	0	0.0528817	mm2	Na4-H28-C8-S8-O16	0	0	equal_bothsteps	equal	0	Success at all eik	This sg doesnt have any
598	EMOPIH_FSR	0	0	0	-0.01064	0	0.0095	-0.00136	0.13947	-0.05814	0	0.01644	0	1e-05	0	1e-05	0.02409	-1e-05	0.02478	0.152001	2	Ni2-H40-C28-O10	4	4	equal_bothsteps	equal	4	Success at all eik	This sg doesnt have any
599	HORXAN_FSR	-1e-05	-1e-05	2e-05	0.01732	0	0	0	-1e-05	-1e-05	0	-0.01725	0	3e-05	2e-05	4e-05	0	0	-0.00549	0.01732	222	Na4-B4-H48-C36-N24-O4	0	0	equal_bothsteps	equal	0	Success at all eik	This sg doesnt have any
600	UMUZUY_FSR	0.00014	6e-05	1e-05	0.00088	-6e-05	0.05335	-0.11042	0.0495	-0.09006	0	-0.01601	0	4e-05	1e-05	-1e-05	0.03681	-2e-05	-0.06103	0.15169	2	Ni2-H24-C16-S4-N4-O8	4	0	notequal_bothsteps	equal	4	Success at all eik	This sg doesnt have any
601	LOHKOK_FSR	4e-05	1e-05	-1e-05	0	-0.24805	0	-0.00056	-3e-05	-0.00033	0.07091	0	0	-0.06131	0.08452	0.21225	0	0	0	0.24805	mm2	Na4-H24-C32-N12-O8	0	0	equal_bothsteps	equal	0	Success at all eik	This sg doesnt have any
602	MUXNUO02_FSR	8e-05	2e-05	7e-05	0.0003	-1e-05	-0.00411	-0.02094	-0.02761	0.0299	0	-0.03358	0	2e-05	5e-05	2e-05	0.04474	-6e-05	-0.01223	0.0567664	2	Na4-H32-C12-S12-N12-O12	0	0	equal_bothsteps	equal	0	Success at all eik	This sg doesnt have any
603	NAASCB01_FSR	-1e-05	-0.00017	0	-0.01366	0	0	0	-3e-05	-1e-05	0	-0.03706	0	0	2e-05	3e-05	0	0	0.03251	0.03706	222	Na4-H28-C24-O24	0	0	equal_bothsteps	equal	0	Success at all eik	This sg doesnt have any
604	NAHSQU01_FSR	0.45099	0.15164	0.55862	0	0.39764	0	-1e-05	0	0	0.06121	0	0.02844	0.2079	0.08804	0.53951	0	0.56872	0	1.14711	m	Na2-H6-C8-O10	0	0	equal_bothsteps	equal	0	Success at all eik	This sg doesnt have any
605	MUMNIR_FSR	-0.02262	-0.17584	0.01653	0	-0.03483	0	0.00021	2e-05	2e-05	0.00397	4e-05	-0.10983	-0.05142	-0.03663	-0.05386	0	0.04106	0	0.184432	m	Na4-H28-C28-N4-O10	0	0	equal_bothsteps	equal	0	Success at all eik	This sg doesnt have any
606	PEYHAF_FSR	0.00604	0.00834	0.01082	-0.00299	0.00625	0.01203	0.05158	0.03278	-0.00754	-0.00072	0.00321	-0.00368	0.01729	0.00136	0.00205	0.00591	0.02418	0.02036	0.0649756	1	Ni2-H38-C34-N10-O10	4	4	equal_bothsteps	notequal	0	This sg doesnt have any	This sg doesnt have any
607	QOZNAV_FSR	-2e-05	-2e-05	-3e-05	0	0.20918	0	3e-05	3e-05	0.0001	0.00083	0	0	0.1328	-0.08851	0.07295	0	0	0	0.20918	mm2	C4-H8-N20-Na4-O12	0	0	equal_bothsteps	equal	0	Success at all eik	This sg doesnt have any
608	LIMLIF_FSR	5e-05	0	3e-05	0	-0.08016	0	-0.00138	-0.00013	-0.001	-0.02856	0	0	1.11324	0.17103	1.01984	0	0	0	1.51942	mm2	Ni2-H24-C16-S2-N4-O8	4	0	notequal_bothsteps	equal	4	Success at all eik	This sg doesnt have any
609	BUGDOY_FSR	-0.00026	-0.00034	5e-05	0.0484	0	0	-0.00011	-7e-05	4e-05	0	-0.0714	0	-3e-05	0	-4e-05	0	0	-0.1181	0.1181	222	Na4-H36-C20-N8-O20	0	0	equal_bothsteps	equal	0	Success at all eik	This sg doesnt have any
610	NARSUW_FSR	0.11669	0.01783	0.02619	0	0.06117	0	0	1e-05	5e-05	-0.01826	0	-0.01781	0.0329	0.02922	0.08905	0	0.03898	0	0.156837	m	C60-H44-N12-Ni2-O8	4	4	equal_bothsteps	equal	4	Success at all eik	This sg doesnt have any
611	YIQMOA_FSR	-3e-05	7e-05	-3e-05	0	0.11023	0	2e-05	0.00021	-7e-05	-0.08758	0	0	0.1325	-0.01549	0.1522	0	0	0	0.202388	mm2	Na4-H24-C24-S8-N4-O20	0	0	equal_bothsteps	equal	0	Success at all eik	This sg doesnt have any
612	PEDSUN_FSR	-0.02089	-0.01958	-0.01706	-0.00229	-0.00046	-0.00022	-0.0045	-0.00817	-0.00367	0.00466	0.00085	0.00018	-0.00136	-0.01492	-0.00726	0.00922	-0.00198	-0.00247	0.0375399	1	Ni2-H14-C16-S4-N6-O2	4	4	equal_bothsteps	notequal	0	This sg doesnt have any	This sg doesnt have any
613	KICQUL_FSR	-2e-05	4e-05	-0.0001	-0.00441	2e-05	-0.13721	-0.16317	-0.09194	-0.01885	0	0.00375	0	-6e-05	-2e-05	-2e-05	-0.08593	-2e-05	0.00688	0.188273	2	Ni2-H28-C20-N4-O10	4	4	equal_bothsteps	equal	4	Success at all eik	This sg doesnt have any
614	QQQDHD01_FSR	2e-05	0	0	0	-0.00526	0	8e-05	5e-05	-1e-05	0.00458	0	0	-0.02381	-0.02854	-0.12151	0	0	0	0.127067	mm2	Na8-H16-C32-O16	0	0	equal_bothsteps	equal	0	Success at all eik	This sg doesnt have any
615	POPVIC_FSR	-0.06582	-0.05016	-0.03891	0	0.00782	0	0	1e-05	1e-05	-0.01336	0	0.00438	-0.04461	-0.00424	-0.04516	0	0.02086	0	0.109049	m	C56-H40-N4-Ni2-O8	4	4	equal_bothsteps	equal	4	Success at all eik	This sg doesnt have any
616	KOGCAM_FSR	-3e-05	0	2e-05	0	0.01853	0	0.00012	2e-05	-1e-05	0.08744	0	0	0.08145	0.12206	-0.08053	0	0	0	0.167385	mm2	Na4-H12-C12-N16-O20	0	0	equal_bothsteps	equal	0	Success at all eik	This sg doesnt have any
617	ORAWEL_FSR	0	0	0	-0.01584	0	0	-2e-05	0	0	0	0.11826	0	0	-1e-05	0	0	0	-0.01574	0.11826	222	Na4-H28-C16-O28	0	0	equal_bothsteps	equal	0	Success at all eik	This sg doesnt have any
618	EVAHAM_FSR	-1e-05	-3e-05	-1e-05	-0.04441	0	0	-0.00045	1e-05	-0.00012	0	-0.02839	0	2e-05	-1e-05	1e-05	0	0	0.00634	0.04441	222	Na4-H40-C36-S4-N8-O20-F12	0	0	equal_bothsteps	equal	0	Success at all eik	This sg doesnt have any
619	UKEWOX_FSR	-1e-05	6e-05	-2e-05	0.00509	0	0	-9e-05	0.00161	-0.0003	0	-0.00787	0	-3e-05	-5e-05	4e-05	0	0	0.01473	0.0147302	222	C36-H32-Na2-O24-Y2	0	0	equal_bothsteps	equal	0	Success at all eik	This sg doesnt have any
620	BINSID_FSR	-0.12414	-0.14707	-0.18071	0	-0.11851	0	4e-05	-0.00087	-0.00076	0.01658	-0.00014	-0.03747	0.06301	0.24769	0.21379	0	0.08134	0	0.441312	m	C8-H10-N16-Na2-O2	0	0	equal_bothsteps	equal	0	Success at all eik	This sg doesnt have any
621	OWUVUY_FSR	0	8e-05	0.00019	0.02573	0	0	-1e-05	0	-7e-05	0	0.02488	0	0	1e-05	2e-05	0	0	-0.0022	0.0257308	222	Br4-C20-H40-Na4-O24	0	0	equal_bothsteps	equal	0	Success at all eik	This sg doesnt have any
622	BEGBOG_FSR	-0.00017	0	0.00028	0.02194	0	0	0.00027	-0.00013	3e-05	0	0.02193	0	6e-05	0.00025	-0.00016	0	0	0.02194	0.0219435	23	Na4-H60-Pb4-C32-O24	0	0	equal_bothsteps	equal	0	Success at all eik	Success at all eik
623	LUYZAH01_FSR	-0.00012	-0.0001	-0.00013	-0.21209	0	0	-4e-05	-5e-05	-6e-05	0	0.21208	0	1e-05	1e-05	2e-05	0	0	0	0.21209	422	C24-H20-N4-Ni2-O8	4	4	equal_bothsteps	notequal	0	Success at all eik	Success at all eik
624	FIFPAM_FSR	-0.21405	-0.03037	-0.03611	0	-0.02663	0	3e-05	0	-3e-05	0.01425	3e-05	-0.01796	-0.0125	0.04258	0.1238	0	-0.00854	0	0.221385	m	C24-H24-N4-Ni2-O10	4	4	equal_bothsteps	equal	4	Success at all eik	This sg doesnt have any
625	NENDAL_FSR	0	0	0	-0.00928	0	-0.00601	-0.00969	-0.01466	-0.00287	0	-0.00113	0	0	0	0	0.00156	0	0.01236	0.0178417	2	Ni2-H44-C44-N8-O12	0	0	equal_bothsteps	equal	0	Success at all eik	This sg doesnt have any
626	PARMIG_FSR	0.00011	-0.00012	0	-0.01992	0	0	-0.00013	0.00011	-1e-05	0	0.01992	0	1e-05	1e-05	1e-05	0	0	0	0.0199214	422	Ni4-H40-C64-N16-O16	8	8	equal_bothsteps	equal	8	Success at all eik	Success at all eik
627	CUZJOX_FSR	0.0003	-0.00015	-0.0001	0.03587	0	0	-8e-05	0.00045	-0.00026	0	0.03598	0	0.00021	-0.0003	0.00022	0	0	0.03578	0.0359839	23	C48-H24-O24-Rb4-Sn4	0	0	equal_bothsteps	equal	0	Success at all eik	Success at all eik
628	DEFNOU_FSR	0.01472	-0.01478	-4e-05	-0.05269	-0.03676	-0.10184	-0.10188	0.10174	-4e-05	-0.03673	0.05266	-0.01475	-0.05089	-0.05089	0.05173	0	0	0	0.159022	3	Ni9-H21-C15-Cl3-O33	18	18	equal_bothsteps	notequal	6	Success at all eik	Success at all eik
629	OFUCOH_FSR	1e-05	0	0	0.00966	0	0	0	0	1e-05	0	-0.07823	0	0	0	0	0	0	-0.05466	0.07823	222	Ni4-H32-C20-N8-O28	8	8	equal_bothsteps	notequal	0	Success at all eik	This sg doesnt have any
630	CEHWIX_FSR	0	0	0	0	0.00115	0	-1e-05	-1e-05	0	-0.03337	0	0	-0.04293	0.00913	0.08769	0	0	0	0.0980606	mm2	Ni4-H20-C20-N8-Cl4-O12	8	8	equal_bothsteps	notequal	0	Success at all eik	This sg doesnt have any
631	ODONUR_FSR	-0.00025	0.00015	-7e-05	0.00518	-2e-05	-0.13155	-0.10611	-0.18969	0.12607	0	0.03848	0	4e-05	-3e-05	-7e-05	-0.12845	3e-05	0.00139	0.254197	2	Ni4-H8-C16-S4-N8-O20	0	0	equal_bothsteps	equal	0	Success at all eik	This sg doesnt have any
632	BOJKAM_FSR	0	0	0	0.09242	0	0	0	1e-05	1e-05	0	0.02132	0	0	0	0	0	0	-0.00259	0.09242	222	Ni4-H36-C16-N4-O24	8	8	equal_bothsteps	equal	8	Success at all eik	This sg doesnt have any
633	GIJPOF_FSR	0.0001	-6e-05	1e-05	-0.02065	-7e-05	0.0107	0.02652	0.06166	-0.03817	0	-0.01852	0	5e-05	2e-05	-4e-05	-0.01706	2e-05	-0.032	0.0794053	2	Sn2-H44-C56-O4	0	0	equal_bothsteps	equal	0	Success at all eik	This sg doesnt have any
634	DORFIA_FSR	0	0	0	0.00017	0	0	0	0	0	0	-0.01289	0	0	0	0	0	0	-0.00329	0.01289	222	Ni4-H72-C40-O24	8	8	equal_bothsteps	equal	8	Success at all eik	This sg doesnt have any
635	CIXKEZ02_FSR	0	0	0	-0.10471	0	0	0	0	0	0	0.07791	0	2e-05	2e-05	2e-05	0	0	0.06545	0.10471	222	Ni8-H48-C32-O56	16	16	equal_bothsteps	notequal	8	Success at all eik	This sg doesnt have any
636	QAYKUZ_FSR	-4e-05	3e-05	2e-05	-0.09758	-5e-05	-0.09994	-0.0531	0.1271	-0.01991	0	-0.03494	0	0.0001	5e-05	4e-05	-0.08032	2e-05	-0.09431	0.18659	2	C26-H16-N2-Ni1-O10	2	2	equal_bothsteps	notequal	0	Success at all eik	This sg doesnt have any
637	NENMAV_FSR	-0.00954	0.00204	0.00728	0	-0.02269	0	-1e-05	0	0	0.04408	0	-0.00139	-0.04126	-0.08452	-0.0025	0	0.05592	0	0.109904	m	C32-Cl2-H34-O4-Sn2	0	0	equal_bothsteps	equal	0	Success at all eik	This sg doesnt have any
638	FELJAJ_FSR	0.05736	0.00291	0.00055	-0.00045	0.01408	0.05747	0.02797	-0.04821	-0.03244	0.04389	-0.0167	0.03075	-0.03139	-0.00693	-0.02619	-0.00837	-0.01246	-0.00181	0.101287	1	H31-Pb1-C29-N5-O7	0	0	equal_bothsteps	equal	0	This sg doesnt have any	This sg doesnt have any
639	LOBNIA_FSR	0	0	0	0	0.00557	0	1e-05	-1e-05	0	-0.00731	0	0	0.08315	-0.02985	-0.02159	0	0	0	0.0909454	mm2	C36-H44-O2-Sn2	0	0	equal_bothsteps	equal	0	Success at all eik	This sg doesnt have any
640	NIFNIB_FSR	-5e-05	0.0001	-2e-05	0.00413	-0.0057	-4e-05	2e-05	-1e-05	-2e-05	0.00569	0.00411	3e-05	-0.00373	0.00375	-4e-05	0	0	-0.00509	0.00735049	-4	C32-Cl1-H32-N4-O4-Ru2	3	3	equal_bothsteps	equal	3	Success at all eik	Success at all eik
641	GEMXUU01_FSR	8e-05	-4e-05	8e-05	0	-0.00894	0	0	0	0	0.21107	0	0	0.32784	0.40705	0.12782	0	0	0	0.538058	mm2	Ni4-H28-C12-N4-Cl8-O8	8	8	equal_bothsteps	equal	8	Success at all eik	This sg doesnt have any
642	ESOMAC_FSR	0	1e-05	1e-05	0.03572	-1e-05	-0.01063	-0.02431	-0.17157	-0.07743	0	0.01081	0	0	1e-05	0	0.02779	0	-0.00574	0.190104	2	Sn2-H62-C50-N2-O6	0	0	equal_bothsteps	equal	0	Success at all eik	This sg doesnt have any
643	OLUNEO_FSR	0	-1e-05	-1e-05	-0.01244	0	0	0.00037	0.0004	0.00012	0	0.00395	0	0	0	0	0	0	-0.00108	0.01244	222	C68-H64-N10-Rh2	0	0	equal_bothsteps	equal	0	Success at all eik	This sg doesnt have any
644	YERZIF_FSR	0.00405	-0.02213	-0.00943	0	-0.0204	0	-1e-05	-2e-05	0	0.03296	1e-05	-0.01612	-0.06265	-0.06458	0.03111	0	0.02853	0	0.0994361	m	C32-Cl4-H32-O4-Sn2	0	0	equal_bothsteps	equal	0	Success at all eik	This sg doesnt have any
645	JATKIB_FSR	0.01423	-0.06201	0.02303	0.01121	0.00333	-0.00724	-0.00266	-0.02213	-0.02154	0.01432	-0.00796	-0.0146	-0.0036	-0.10395	0.00993	-0.00696	0.02537	-0.03131	0.130272	1	Sn2-H28-C12-O6	0	0	equal_bothsteps	equal	0	This sg doesnt have any	This sg doesnt have any
646	IFIWIE_FSR	-1e-05	-4e-05	0	0.06547	0	0	6e-05	-5e-05	-8e-05	0	0.03824	0	1e-05	-4e-05	1e-05	0	0	0.04731	0.06547	222	C8-H8-Ni2-O12	4	4	equal_bothsteps	equal	4	Success at all eik	This sg doesnt have any
647	FIJROG_FSR	0	0	0	0	-0.10394	0	0	0	-1e-05	-0.01932	0	0	-0.02557	0.04996	-0.13188	0	0	0	0.143325	mm2	Ni4-H56-C40-N32-O4	8	8	equal_bothsteps	notequal	0	Success at all eik	This sg doesnt have any
648	AHIJOQ01_FSR	0.0002	0.00014	8e-05	0.10999	0	0	-0.00025	-9e-05	-0.00014	0	-0.07094	0	4e-05	-1e-05	0.00016	0	0	0.2869	0.2869	222	H16-Pb4-C16-O24	0	0	equal_bothsteps	equal	0	Success at all eik	This sg doesnt have any
649	BOJKAM03_FSR	0	0	0	0.13838	0	0	-1e-05	1e-05	0	0	0.07105	0	0	0	0	0	0	-0.06495	0.13838	222	Ni4-H36-C16-N4-O24	8	8	equal_bothsteps	notequal	0	Success at all eik	This sg doesnt have any
650	WARJAC_FSR	0.02807	-0.02893	-0.00017	0.01583	0	0	0.00033	9e-05	7e-05	-0.00058	-0.01486	-0.02698	-0.00013	-0.00013	-0.00013	0	0	0	0.043307	32	Ni9-H36-C24-N18-O42	18	18	equal_bothsteps	notequal	6	Success at all eik	Failed at e26
651	CARFAD_FSR	2e-05	-3e-05	3e-05	0	0.06639	0	5e-05	-4e-05	6e-05	0.03154	0	0	0.02799	0.01896	0.17126	0	0	0	0.174565	mm2	C24-H32-N8-S8-Sn4	0	0	equal_bothsteps	equal	0	Success at all eik	This sg doesnt have any
652	DAWCAH_FSR	-0.00044	-0.00063	-0.00022	0.06982	0	0	0	1e-05	-2e-05	0	-0.00074	0	0	1e-05	0	0	0	0.03918	0.0698246	222	Ni4-H32-C40-N4-O20	4	0	notequal_bothsteps	equal	4	Success at all eik	This sg doesnt have any
653	BIGSUG_FSR	-6e-05	4e-05	-0.0001	0.10114	0	0	-3e-05	-8e-05	0	0	0.01774	0	4e-05	7e-05	0.00013	0	0	0.07756	0.10114	222	Sn4-H44-C20-S4-N4-O8	0	0	equal_bothsteps	equal	0	Success at all eik	This sg doesnt have any
654	INICPB01_FSR	0.20238	0.06277	0.12052	0.00077	0.08042	0.00022	-0.00201	-0.00328	0.00013	-0.07398	-0.00193	-0.03781	0.59564	0.29391	0.34856	0.00229	0.03706	-0.00166	0.790341	m	C24-H20-N4-O10-Pb2	0	0	equal_bothsteps	equal	0	Failed at e36	This sg doesnt have any
655	GELVID_FSR	-0.09587	0.09598	0	0.12383	0	0	0.00016	-6e-05	-1e-05	-0.0002	-0.12391	0.09607	0	0	0	0	0	0	0.183677	32	Ni3-H12-C21-O15	6	6	equal_bothsteps	equal	6	Success at all eik	Success at all eik
656	BOJKAM01_FSR	0	0	0	0.10698	0	0	0	0	0	0	0.09551	0	0	0	1e-05	0	0	0.01489	0.10698	222	Ni4-H36-C16-N4-O24	8	8	equal_bothsteps	notequal	0	Success at all eik	This sg doesnt have any
657	ODEWEA_FSR	0	-1e-05	-2e-05	0.47027	-1e-05	0.15531	0.00255	0.04989	-0.01156	0	0.09646	0	3e-05	5e-05	3e-05	0.13968	-3e-05	0.18528	0.532953	2	C18-H20-N2-O4-Pb1	0	0	equal_bothsteps	equal	0	Success at all eik	This sg doesnt have any
658	INOJIG_FSR	4e-05	-2e-05	2e-05	-0.14023	0	0	-1e-05	0	-1e-05	0	0.14023	0	1e-05	1e-05	2e-05	0	0	0	0.14023	622	Rb2-Ni2-H6-C6-O12	4	4	equal_bothsteps	equal	4	Success at all eik	Success at all eik
659	XUBLUC01_FSR	3e-05	-1e-05	-3e-05	0.06909	3e-05	0.01191	0.05214	0.33781	0.03165	0	0.00185	0	4e-05	1e-05	2e-05	0.00416	-1e-05	-0.03517	0.343277	2	C18-H30-Ni3-O24	6	6	equal_bothsteps	notequal	2	Success at all eik	This sg doesnt have any
660	UGAFIR01_FSR	-2e-05	4e-05	-0.00015	-0.01954	-2e-05	0.03879	0.06991	0.05364	-0.02939	0	-0.04117	0	3e-05	8e-05	3e-05	0.02251	5e-05	-0.06775	0.101604	2	Ni2-H16-C8-O14	4	4	equal_bothsteps	equal	4	Success at all eik	This sg doesnt have any
661	GETWEJ_FSR	0	-1e-05	0	0.05226	0	0	-1e-05	-0.00015	0	0	0.05177	0	-2e-05	-5e-05	1e-05	0	0	0.00598	0.05226	222	C16-H8-N8-O4-Pb2	0	0	equal_bothsteps	equal	0	Success at all eik	This sg doesnt have any
662	BUXFUW_FSR	0.01862	0.00556	-0.00449	-0.03517	0.00348	-0.04063	-0.01475	-0.01875	0.0218	0.02228	0.01488	-0.00685	-0.01794	-0.01828	0.03408	-0.01373	0.01161	-0.02541	0.063692	222	Ni4-H48-C32-N32	2	6	notequal_bothsteps	notequal	8	Failed at e35	This sg doesnt have any
663	FAYXEJ02_FSR	-0.44817	-0.1956	-0.31282	0	-0.05201	0	-5e-05	2e-05	-3e-05	-0.0227	-3e-05	0.04177	-0.0666	-0.00369	-0.2498	0	0.09013	0	0.612915	m	C8-H12-Ni2-O12	4	4	equal_bothsteps	equal	4	Success at all eik	This sg doesnt have any
664	EBOYOK_FSR	-1e-05	-1e-05	-5e-05	0	0.0024	0	0.00224	-0.00255	-0.00367	0.03646	0	0	-0.04381	-0.01192	0.51656	0	0	0	0.518565	mm2	C16-H24-N8-S12-Sn4	0	0	equal_bothsteps	equal	0	Success at all eik	This sg doesnt have any
665	FAFMOO_FSR	0	0	0	0.03561	0	0	0	0	1e-05	0	0.0278	0	0	-1e-05	0	0	0	0.05076	0.05076	222	Ni4-H36-C20-N12-O24	8	8	equal_bothsteps	equal	8	Success at all eik	This sg doesnt have any
666	WIPKAJ_FSR	-0.00149	0.05195	0.00225	0	0.03732	0	-0.00024	-0.00442	0.00013	-0.01019	0	0	-0.02005	0.01993	-0.09183	0	0	0	0.0968175	mm2	C40-H28-N12-O18-Pb2	0	0	equal_bothsteps	equal	0	Success at all eik	This sg doesnt have any
667	MERFUN_FSR	-0.0004	-1e-05	0.00043	0.05767	0	0	-0.00077	0.00038	-0.00077	0	0.06235	0	6e-05	-0.0001	-0.00086	0	0	-0.01486	0.0623607	222	H20-Pb4-C24-N12-O16	0	0	equal_bothsteps	equal	0	Success at all eik	This sg doesnt have any
668	PIRMOU_FSR	-0.00125	-0.00029	0.0029	-0.03919	0	0	-2e-05	0.00018	0.0001	0	0.00532	0	-4e-05	0.00042	0.00018	0	0	0.00349	0.0393181	222	Rb4-H16-C32-N8-Cl8-O16	0	0	equal_bothsteps	equal	0	Success at all eik	This sg doesnt have any
669	MIMREF01_FSR	-1e-05	1e-05	0	-0.0254	0	0	0	0	0	0	0.02116	0	0	0	0	0	0	0.01522	0.0254	222	Ni4-H28-C28-N4-O24	8	8	equal_bothsteps	equal	8	Success at all eik	This sg doesnt have any
670	METJIH_FSR	1e-05	-6e-05	-1e-05	-0.01287	0	0	-3e-05	0	-2e-05	0	0.01285	0	-4e-05	-4e-05	4e-05	0	0	0	0.0128701	422	H32-Pb8-C24-Br8-O16	0	0	equal_bothsteps	equal	0	Success at all eik	Success at all eik
671	SNMAZH_FSR	2e-05	-2e-05	1e-05	0	-0.06358	0	0.00011	3e-05	1e-05	0.02959	0	0	-0.1275	0.07566	0.26167	0	0	0	0.300752	mm2	Sn4-H16-C16-O20	0	0	equal_bothsteps	equal	0	Success at all eik	This sg doesnt have any
672	GELVID01_FSR	0.09437	-0.0943	0	-0.13514	0	0	0.00043	-0.00031	8e-05	-0.00034	0.13539	-0.09382	1e-05	1e-05	1e-05	0	0	0	0.189901	32	Ni6-H24-C42-O30	12	12	equal_bothsteps	equal	12	Success at all eik	Success at all eik
673	VEWMEP_FSR	0	0	0	-0.01497	0	0	0	0	0	0	-0.05212	0	0	0	0	0	0	-0.04762	0.05212	222	Sr4-H44-C16-N4-O28	0	0	equal_bothsteps	equal	0	Success at all eik	This sg doesnt have any
674	RUFSUI_FSR	3e-05	0	-1e-05	0.00309	2e-05	-0.01043	0.0016	-0.01145	0.0188	0	-0.01314	0	-1e-05	0	0	-0.02815	0	-0.01548	0.0322193	2	Sn4-H64-C44-O24	0	0	equal_bothsteps	equal	0	Success at all eik	This sg doesnt have any
675	MEYFIF01_FSR	0.01452	-0.00606	-0.01681	0.01292	-0.00608	-0.01912	-0.00513	0.06469	0.00204	-0.0031	-0.02154	-0.01658	-0.10523	-0.02106	0.00486	0.01785	-0.00736	-0.01675	0.110854	1	Sr2-H18-C8-O15	0	0	equal_bothsteps	equal	0	This sg doesnt have any	This sg doesnt have any
676	SRFORA06_FSR	4e-05	4e-05	3e-05	0.04018	0	0	4e-05	4e-05	3e-05	0	-0.04018	0	0	0	0	0	0	0	0.0401801	422	Sr4-H8-C8-O16	0	0	equal_bothsteps	equal	0	Success at all eik	Success at all eik
677	VEYKAO_FSR	0	0.00011	2e-05	0	-0.11062	0	-6e-05	-6e-05	-0.00012	-0.08159	0	0	-0.2033	-0.03135	-0.40903	0	0	0	0.457842	mm2	Sn4-H12-C28-N4-O20	0	0	equal_bothsteps	equal	0	Success at all eik	This sg doesnt have any
678	BOXMAE_FSR	0.00012	-0.00014	-0.00016	-0.01233	0	0	-7e-05	5e-05	2e-05	0	-0.0444	0	-3e-05	-3e-05	-0.0001	0	0	-0.00081	0.0444001	222	Sr4-H20-C28-N4-O20	0	0	equal_bothsteps	equal	0	Success at all eik	This sg doesnt have any
679	SRFORA04_FSR	5e-05	3e-05	3e-05	-0.26973	0	0	-9e-05	-3e-05	-0.0001	0	-0.05345	0	-1e-05	1e-05	3e-05	0	0	-0.3076	0.3076	222	Sr4-H8-C8-O16	0	0	equal_bothsteps	equal	0	Success at all eik	This sg doesnt have any
680	KIVYEU_FSR	0.13556	-0.1671	-0.03185	-0.00129	-0.11483	0.00082	0.00042	0.00687	0.00276	-0.04159	-0.00187	-0.0532	0.13574	0.06969	-0.00913	7e-05	0.10142	0.0016	0.247557	m	C16-H30-N2-O24-Sr2	0	0	equal_bothsteps	equal	0	Failed at e36	This sg doesnt have any
681	JERYUA_FSR	1e-05	0	1e-05	0.0171	0.08516	0	1e-05	-1e-05	0	0.08516	-0.01708	1e-05	0.08382	0.08382	0.01784	0	0	0	0.119874	6	Sn6-H72-C48-S6-O12	0	0	equal_bothsteps	equal	0	Success at all eik	Success at all eik
682	GANVIC_FSR	0	1e-05	-1e-05	0	-0.00054	0	0	-1e-05	-2e-05	0.03292	0	0	-0.01619	-0.0827	0.03593	0	0	0	0.0916099	mm2	Sn4-H52-C36-N12	0	0	equal_bothsteps	equal	0	Success at all eik	This sg doesnt have any
683	JUMDAY_FSR	-0.00209	-0.00485	-0.00637	0.07486	0	0	0	-2e-05	-2e-05	0	-0.00308	0	-2e-05	-4e-05	-8e-05	0	0	0.00031	0.0753159	222	V4-H48-C48-S4-O24	3	0	notequal_bothsteps	notequal	0	Success at all eik	This sg doesnt have any
684	KIYMAI01_FSR	-2e-05	6e-05	0	0.11474	0	0	0	1e-05	1e-05	0	0.00105	0	-4e-05	-0.0002	-0.0001	0	0	-0.00618	0.11474	222	Sr4-H52-C60-N4-O20	0	0	equal_bothsteps	equal	0	Success at all eik	This sg doesnt have any
685	REQBUL_FSR	9e-05	0.00038	7e-05	-0.00732	0	0	1e-05	0	3e-05	0	-0.02435	0	1e-05	0	1e-05	0	0	-0.00348	0.02435	222	Sn4-H36-C36-N4-O8-F8	0	0	equal_bothsteps	equal	0	Success at all eik	This sg doesnt have any
686	NIHFUG_FSR	0	0	0	-0.04219	0	0	-1e-05	0	0	0	-0.05312	0	-2e-05	0	1e-05	0	0	-0.02151	0.05312	222	Tl4-H64-C44-S4-N4-O8	0	0	equal_bothsteps	equal	0	Success at all eik	This sg doesnt have any
687	DOZBAX_FSR	0.00044	-0.00048	0.00012	0.0205	0.01278	0.00026	-0.00065	-0.00035	-0.00036	-0.01288	0.02036	-2e-05	0.06002	-0.06003	2e-05	0	0	0.02033	0.0872919	-4	C64-H44-N8-O20-Yb4	0	0	equal_bothsteps	equal	0	Success at all eik	Success at all eik
688	DUFXOT_FSR	-2e-05	8e-05	0.00021	0	-0.05516	0	-0.00347	-0.00608	-0.00673	-0.18658	0	0	-0.06331	-0.35771	0.31244	0	0	0	0.479149	mm2	C16-H20-O20-S2-Sr2	0	0	equal_bothsteps	equal	0	Success at all eik	This sg doesnt have any
689	UFOCID_FSR	-0.01476	0.01474	0	0.03925	0	0	0.0001	-8e-05	4e-05	0	-0.0392	0.01471	-6e-05	-6e-05	0.00018	0	0	0	0.0444491	32	C9-H18-O24-Y2	0	0	equal_bothsteps	equal	0	Success at all eik	Success at all eik
690	BEHSEP_FSR	-0.00109	-0.00384	-0.00155	0	-0.05608	0	-7e-05	-0.00015	-0.00019	-0.00094	0	0	-0.11306	-0.11965	-0.05291	0	0	0	0.172959	mm2	C36-H52-N4-O8-Sn4	0	0	equal_bothsteps	equal	0	Success at all eik	This sg doesnt have any
691	MAQVOR_FSR	-0.00396	0.0039	0	0.03878	0	0	-0.00014	2e-05	-8e-05	5e-05	-0.03886	0.00394	0.00011	0.00011	0.00017	0	0	0	0.0391849	32	C9-H18-O24-Yb2	0	0	equal_bothsteps	equal	0	Success at all eik	Success at all eik
692	XOBGOK_FSR	-1e-05	-3e-05	0	0.01955	0	0	0	0	0	0	0.01499	0	0	1e-05	0	0	0	0.10134	0.10134	222	Tl4-B4-H24-C16-N24	0	0	equal_bothsteps	equal	0	Success at all eik	This sg doesnt have any
693	JIPYEP_FSR	0	0	1e-05	0.02861	0	0.06945	-0.00498	0.00946	0.01209	0	0.03847	0	0	0	0	0.03653	0	0.01719	0.0814986	2	Sn4-P2-H64-C30-N2-O8	0	0	equal_bothsteps	equal	0	Success at all eik	This sg doesnt have any
694	PEPLIG_FSR	-0.00067	0.00021	0.00169	0.20435	0	0	1e-05	-2e-05	-3e-05	0	0.00173	0	1e-05	1e-05	5e-05	0	0	0.00973	0.204358	222	V4-H32-C48-S4-O20	3	0	notequal_bothsteps	notequal	2	Success at all eik	This sg doesnt have any
695	SEBMER01_FSR	0	1e-05	1e-05	-0.05229	0	0	0	0	0	0	-0.02866	0	0	1e-05	0	0	0	0.00467	0.05229	222	Sr4-H52-C20-N4-O28	0	0	equal_bothsteps	equal	0	Success at all eik	This sg doesnt have any
696	NOZKIW_FSR	0.00012	-5e-05	2e-05	-0.07253	0	0	-0.00013	0.00015	-2e-05	0	-0.07245	0	2e-05	2e-05	1e-05	0	0	-0.02316	0.0725301	-42m	Sr2-P4-H24-C8-O16	0	0	equal_bothsteps	equal	0	Success at all eik	Success at all eik
697	NIHFOA_FSR	-4e-05	-1e-05	0	0.07734	0	0	0	0	0	0	0.05733	0	2e-05	1e-05	-1e-05	0	0	0.03322	0.07734	222	Tl4-H56-C40-S4-N4-O8	0	0	equal_bothsteps	equal	0	Success at all eik	This sg doesnt have any
698	FAQLER_FSR	3e-05	-0.0002	-0.00033	-0.05318	0	0	-0.00073	0.00085	0.0002	0	0.05358	0	0.00024	0.00024	-0.00035	0	0	2e-05	0.0535921	422	C32-H16-O20-V4	8	8	equal_bothsteps	equal	8	Success at all eik	Success at all eik
699	HUJGUP_FSR	0	0	0	0	-0.29124	0	-1e-05	0	-2e-05	0.07698	0	0	-0.16893	0.1414	-0.2891	0	0	0	0.36347	mm2	Sn4-H52-C36-N4-O12	0	0	equal_bothsteps	equal	0	Success at all eik	This sg doesnt have any
700	IXODUV_FSR	-0.0014	-0.0028	-0.00332	0.01001	0	0	-3e-05	-8e-05	-9e-05	0	-0.00608	0	0	1e-05	3e-05	0	0	-0.00559	0.0110012	222	V4-H48-C56-O20	3	0	notequal_bothsteps	notequal	2	Success at all eik	This sg doesnt have any
701	HXTPSN01_FSR	0	0	0	-0.04977	0	0	1e-05	0	-1e-05	0	-0.0234	0	-1e-05	0	0	0	0	0.03057	0.04977	222	Sn4-H64-C72-O4	0	0	equal_bothsteps	equal	0	Success at all eik	This sg doesnt have any
702	KOTDII_FSR	1e-05	0	1e-05	0.06931	0	0	0	0	0	0	0.02388	0	0	0	0	0	0	0.03632	0.06931	222	Y4-H60-C44-O24	0	0	equal_bothsteps	equal	0	Success at all eik	This sg doesnt have any
703	JUMCUR_FSR	-0.00034	-0.00157	-0.00219	-0.03199	0	0	-6e-05	-2e-05	-3e-05	0	0.00881	0	-2e-05	-0.00013	-0.00027	0	0	-0.00278	0.0321051	222	V4-H52-C48-S4-N4-O20	3	0	notequal_bothsteps	notequal	0	Success at all eik	This sg doesnt have any
704	UDISIK_FSR	-2e-05	-4e-05	0.0001	0.14893	0	0	-4e-05	-0.00029	-4e-05	0	-0.00235	0	-1e-05	3e-05	3e-05	0	0	-0.00427	0.14893	222	C10-F3-H8-N2-V1	2	2	equal_bothsteps	equal	2	Success at all eik	This sg doesnt have any
705	DOQMEB_FSR	1e-05	3e-05	0	-0.00255	0	0	-1e-05	1e-05	-2e-05	0	0.02889	0	-1e-05	-3e-05	-2e-05	0	0	-0.00073	0.02889	222	C48-H60-O26-Sr2	0	0	equal_bothsteps	equal	0	Success at all eik	This sg doesnt have any
706	NOCLOH01_FSR	-0.04651	0.04697	-0.00048	0.01542	0.01011	0.06174	0.06156	-0.06111	2e-05	0.01015	-0.01363	0.04687	-0.021	-0.021	-0.07379	0	0	0	0.110377	3	Sr3-H33-C33-N3-O15	0	0	equal_bothsteps	equal	0	Success at all eik	Success at all eik
707	BOSGIA_FSR	0.00031	0.00023	0.00033	0	0.07903	0	-5e-05	-0.00015	-0.00033	-0.24238	0	0	0.09644	-0.20846	-0.04301	0	0	0	0.242381	mm2	C4-H16-N24-O16-Sr4	0	0	equal_bothsteps	equal	0	Success at all eik	This sg doesnt have any
708	VENDAU_FSR	0	0	-1e-05	0	0.00862	0	0	1e-05	0	0.03169	0	0	-0.05012	-0.00275	-0.02045	0	0	0	0.0542013	mm2	Sn4-H52-C24-S4-N12	0	0	equal_bothsteps	equal	0	Success at all eik	This sg doesnt have any
709	UQEFUS_FSR	-7e-05	-5e-05	-0.0001	-0.04387	7e-05	0.03603	0.01295	0.00975	0.04996	0	0.02769	0	-4e-05	-0.00019	-0.00011	0.00902	-0.00016	0.00285	0.0593767	2	Sn4-H24-C28-N4-O22	0	0	equal_bothsteps	equal	0	Success at all eik	This sg doesnt have any
710	XEJVEP_FSR	-0.06799	0.09281	0.14376	0	0.0816	0	-0.00054	0.00061	-0.00103	0.1174	5e-05	-0.01705	0.01066	0.18364	-0.24761	0	0.02537	0	0.317357	m	C20-H16-N8-O18-Sr2	0	0	equal_bothsteps	equal	0	Success at all eik	This sg doesnt have any
711	OPITOY_FSR	-0.00103	-0.00023	-0.00223	-0.00021	0.00038	0.00016	0.00254	0.00412	0.00329	-0.00186	-0.00042	-0.00015	0.00209	0.0005	0.00075	0.00037	0.00077	0.00018	0.00660173	222	H12-W8-C8-N12-O24	0	0	equal_bothsteps	equal	0	Success at all eik	This sg doesnt have any
712	KOTDOO_FSR	-1e-05	0	0	0.06222	0	0	0	0	0	0	0.02403	0	0	0	0	0	0	0.03703	0.06222	222	Yb4-H60-C44-O24	0	0	equal_bothsteps	equal	0	Success at all eik	This sg doesnt have any
713	PEPLEC_FSR	0.0006	0.0002	3e-05	0.12954	0	0	0	0	0	0	-0.00015	0	0	-1e-05	0	0	0	0.02464	0.129542	222	V4-H44-C56-N4-O20	3	0	notequal_bothsteps	notequal	2	Success at all eik	This sg doesnt have any
714	BEDWEN_FSR	1e-05	1e-05	0	0.02344	0	0	0	0	-1e-05	0	0.01519	0	0	0	-3e-05	0	0	-0.02118	0.02344	222	Sn4-H76-C44-S4-N4-O12	0	0	equal_bothsteps	equal	0	Success at all eik	This sg doesnt have any
715	CUGSON_FSR	3e-05	-0.00012	-1e-05	-0.12472	0	0	0	2e-05	0	0	0.07322	0	0	0	0	0	0	-0.37205	0.37205	222	C8-H8-O12-Sr2	0	0	equal_bothsteps	equal	0	Success at all eik	This sg doesnt have any
716	DUWWOH03_FSR	-0.0433	-0.01754	0.00161	0	0.06383	0	1e-05	1e-05	-1e-05	-0.00124	0	0.00454	0.01193	0.03793	0.05427	0	-0.03629	0	0.0973063	m	Sn8-H72-C32-O20	0	0	equal_bothsteps	equal	0	Success at all eik	This sg doesnt have any
717	XEQMUB01_FSR	-0.0004	-0.00012	-0.00069	0.0845	0.00063	0.00861	0.1085	0.04058	0.02208	0	0.11187	0	-0.00017	-0.00011	0.00016	0.09018	-0.00012	0.06074	0.162547	2	C28-H32-N4-O12-Sr2	0	0	equal_bothsteps	equal	0	Success at all eik	This sg doesnt have any
718	LEZNOV_FSR	-0.06908	0.06885	0.00013	-0.0917	0	0	-0.00106	0.00107	0.00021	-0.00013	0.09165	0.06889	0.0002	0.0002	0.00032	0	0	0	0.13389	32	C18-H15-N6-O21-Yb3	0	0	equal_bothsteps	equal	0	Success at all eik	Success at all eik
719	KERKEY_FSR	0.04147	0.00951	0.01081	0	-0.01375	0	0	1e-05	-1e-05	0.02834	0	-0.03249	-0.00345	0.02234	0.00235	0	-0.04683	0	0.0566471	m	Sn4-H68-C56-S6-N12	0	0	equal_bothsteps	equal	0	Success at all eik	This sg doesnt have any
720	FEJGEH_FSR	3e-05	-0.03061	-0.00821	0.00651	-0.01783	0.0066	-0.00316	0.00609	-0.00762	0.00315	0.01026	-0.00203	-0.02376	0.00268	0.01083	-0.00199	-0.00707	0.00681	0.0384691	1	Sn1-H26-C18-N2-Cl2	0	0	equal_bothsteps	equal	0	This sg doesnt have any	This sg doesnt have any
721	UCOCEV_FSR	-0.00019	-1e-05	-0.0001	0.03832	7e-05	-0.04208	-0.02225	-0.11589	-0.05957	0	0.01481	0	5e-05	9e-05	7e-05	-0.00945	5e-05	0.0424	0.133017	2	Sr2-H36-C24-O28	0	0	equal_bothsteps	equal	0	Success at all eik	This sg doesnt have any
722	AFADOD_FSR	-2e-05	4e-05	3e-05	0.14681	0	-0.0414	-0.07983	-0.05928	-0.14568	0	0.15384	0	7e-05	6e-05	7e-05	-0.03408	-7e-05	0.025	0.234044	2	Cd2-H18-C10-Br4-N2-O6	0	0	equal_bothsteps	equal	0	Success at all eik	This sg doesnt have any
723	ODEQET01_FSR	-1e-05	-1e-05	-1e-05	0	0.0081	0	1e-05	2e-05	1e-05	-0.00794	0	0	0.00718	-0.00725	-2e-05	0	0	0	0.0102037	-42m	Cd2-H12-C20-Br12-N4	0	0	equal_bothsteps	equal	0	Success at all eik	Success at all eik
724	DOLDUE_FSR	0.0541	0.13971	0.06028	0	-0.43215	0	-0.03352	-0.01487	0.00227	0.22929	0	0	-0.34623	0.20391	0.0388	0	0	0	0.46436	mm2	C16-Cd2-H16-N24	0	0	equal_bothsteps	equal	0	Success at all eik	This sg doesnt have any
725	RIFRAB_FSR	2e-05	0	1e-05	-0.03412	-1e-05	-0.02844	0.01294	0.05075	-0.09144	0	-0.08082	0	1e-05	-3e-05	2e-05	0.02292	-1e-05	-0.06316	0.132801	2	Cd2-H16-C12-S2-N4-O12	0	0	equal_bothsteps	equal	0	Success at all eik	This sg doesnt have any
726	CACROP_FSR	0.07742	-0.05803	0.08298	0	0.06824	0	-1e-05	-2e-05	-5e-05	-0.02573	0	-0.06124	0.10015	-0.07251	0.04046	0	0.09392	0	0.212572	m	C20-Cd2-H40-N4-O10	0	0	equal_bothsteps	equal	0	Success at all eik	This sg doesnt have any
727	AFUKIW_FSR	0.61081	0.11438	0.12658	0	0.17061	0	0.00022	-0.00025	2e-05	0.0642	5e-05	0.0859	0.37213	0.27196	0.16862	0	0.13147	0	0.81183	m	C14-Cd2-H18-N2-O14	0	0	equal_bothsteps	equal	0	Success at all eik	This sg doesnt have any
728	ODEPOC_FSR	0	0	0	0	-0.01739	0	0	0	0	0.01736	0	0	-0.01666	0.01654	-3e-05	0	0	0	0.0234761	-42m	Cd2-H12-C20-Br8-N4-Cl4	0	0	equal_bothsteps	equal	0	Success at all eik	Success at all eik
729	ODEPUI_FSR	0	0	0	0	-0.04463	0	0	-1e-05	0	0.04464	0	0	-0.02715	0.02701	-5e-05	0	0	0	0.04464	-42m	Cd2-H36-C28-N4-Cl4	0	0	equal_bothsteps	equal	0	Success at all eik	Success at all eik
730	BATVEA_FSR	-5e-05	0	1e-05	0	0.09262	0	0.00012	7e-05	2e-05	-0.04902	0	0	-0.00034	-0.0582	0.03872	0	0	0	0.09262	mm2	C24-Cd2-H24-N4-O16	0	0	equal_bothsteps	equal	0	Success at all eik	This sg doesnt have any
731	XUHSOI_FSR	-0.0001	5e-05	7e-05	0	0.01566	0	4e-05	-9e-05	-9e-05	0.148	0	0	-0.06529	-0.04283	0.04132	0	0	0	0.148	mm2	C12-Cd2-H20-N4-O10	0	0	equal_bothsteps	equal	0	Success at all eik	This sg doesnt have any
732	BESQEX_FSR	-1e-05	1e-05	2e-05	0.02604	6e-05	-0.00328	0.04613	0.11745	0.04472	0	0.01809	0	-0.0001	4e-05	-2e-05	-0.01395	4e-05	0.05138	0.135091	2	Cd2-H12-C16-S2-N6-Cl2-O6	0	0	equal_bothsteps	equal	0	Success at all eik	This sg doesnt have any
733	SEBTOJ_FSR	-8e-05	8e-05	-2e-05	0.06235	-4e-05	-0.01838	0.02229	-0.15692	-0.04294	0	-0.01836	0	6e-05	0.00028	5e-05	-0.10481	0.00019	-0.00907	0.165233	2	Cd2-H16-C14-S2-N8-O10	0	0	equal_bothsteps	equal	0	Success at all eik	This sg doesnt have any
734	HESMOK_FSR	-0.02063	-0.02167	0.12111	-0.07742	-0.00397	0.01275	-0.0645	0.05222	-0.0313	0.00492	-0.06765	0.01189	0.16651	0.02124	-0.12257	-0.01671	-0.01815	-0.02339	0.232798	1	Cd2-H30-C24-N2-O16	0	0	equal_bothsteps	equal	0	This sg doesnt have any	This sg doesnt have any
735	EJAXAO_FSR	-3e-05	4e-05	2e-05	-0.01894	0	0	4e-05	-3e-05	2e-05	0	-0.01894	0	-1e-05	-1e-05	1e-05	0	0	-0.01306	0.0189401	-42m	Cd2-H16-C24-S2-N4-O8	0	0	equal_bothsteps	equal	0	Success at all eik	Success at all eik
736	ODEQIX01_FSR	0	0	0	0	-0.03966	0	0	0	0	0.03959	0	0	-0.02267	0.02254	-4e-05	0	0	0	0.03966	-42m	Cd2-H36-C28-Br4-N4	0	0	equal_bothsteps	equal	0	Success at all eik	Success at all eik
737	NEYRIV_FSR	-4e-05	-1e-05	-3e-05	0.01435	1e-05	-0.04554	-0.07349	0.055	-0.12946	0	-0.00931	0	7e-05	1e-05	5e-05	-0.06311	1e-05	0.02479	0.158973	2	Cd2-H20-C24-N8-O14	0	0	equal_bothsteps	equal	0	Success at all eik	This sg doesnt have any
738	MCYSCD_FSR	2e-05	-2e-05	1e-05	0.00655	-1e-05	0.03567	-0.02856	-0.02228	0.02317	0	0.02055	0	1e-05	-1e-05	0	0.02093	-1e-05	0.02314	0.0476574	2	Cd2-H32-C16-S4-N4-O8	0	0	equal_bothsteps	equal	0	Success at all eik	This sg doesnt have any
739	FIGHEJ_FSR	0	0.00011	8e-05	-0.07068	-1e-05	0.03554	-0.02698	0.01573	-0.07343	0	-0.01653	0	5e-05	8e-05	-9e-05	-0.01587	-3e-05	-0.04441	0.0814901	2	Cd2-H16-C24-I4-N8-O2	0	0	equal_bothsteps	equal	0	Success at all eik	This sg doesnt have any
740	YAQMIO_FSR	0	-1e-05	0	0	-0.11157	0	1e-05	-1e-05	1e-05	-0.27439	0	0	-0.02418	0.03268	-0.02075	0	0	0	0.27439	mm2	Cd2-H20-C20-Br4-N12-O8	0	0	equal_bothsteps	equal	0	Success at all eik	This sg doesnt have any
741	ODEPIW_FSR	1e-05	0	0	0	-0.01037	0	0	0	0	0.01043	0	0	-0.01735	0.01731	-3e-05	0	0	0	0.0245084	-42m	Cd2-H12-C20-N4-Cl12	0	0	equal_bothsteps	equal	0	Success at all eik	Success at all eik
742	TEJSAE_FSR	1e-05	-1e-05	1e-05	0.03198	-1e-05	-0.02481	0.07464	-0.25699	0.03367	0	-0.02846	0	-3e-05	1e-05	-3e-05	0.05128	1e-05	-0.01646	0.271217	2	Cd2-H12-C18-S2-O8	0	0	equal_bothsteps	equal	0	Success at all eik	This sg doesnt have any
743	UTATOA_FSR	0	2e-05	0	-0.00705	0	-0.00334	0.00772	-0.00245	0.03584	0	0.07514	0	2e-05	0	-2e-05	-0.00065	-1e-05	0.01689	0.0836429	2	C28-Cd2-H28-N8-O8	0	0	equal_bothsteps	equal	0	Success at all eik	This sg doesnt have any
744	BADBUF_FSR	0.09421	0.174	-0.04095	0	-0.0773	0	0	-2e-05	-1e-05	0.20688	0	-0.12854	-0.01278	0.02925	-0.05093	0	-0.05708	0	0.243561	m	Br2-C36-Cd2-H30-N24	0	0	equal_bothsteps	equal	0	Success at all eik	This sg doesnt have any
745	EDEYES_FSR	0.00436	0.09552	0.10563	0	0.05334	0	1e-05	4e-05	0.00021	0.02035	-2e-05	0.00285	-0.02557	0.091	-0.06738	0	0.01904	0	0.154159	m	C24-Cd2-H28-N8-O14-S2	0	0	equal_bothsteps	equal	0	Success at all eik	This sg doesnt have any
746	RITDIJ_FSR	-1e-05	-2e-05	0	0	0.11551	0	-3e-05	-6e-05	-3e-05	-0.07901	0	0	0.05371	0.04088	0.04037	0	0	0	0.11551	mm2	C28-Cd2-H28-N8-O8	0	0	equal_bothsteps	equal	0	Success at all eik	This sg doesnt have any
747	KIDLOZ_FSR	0.25771	-0.05002	0.31694	0	-0.08496	0	-0.00012	1e-05	-0.00012	0.22169	3e-05	0.1001	0.01282	-0.18768	0.00663	0	0.15538	0	0.420247	m	Cd2-H20-C18-N12-O12	0	0	equal_bothsteps	equal	0	Success at all eik	This sg doesnt have any
748	RIFTOQ_FSR	8e-05	7e-05	5e-05	-0.136	7e-05	0.0423	0.12953	-0.07955	0.02832	0	-0.12069	0	-1e-05	-1e-05	-1e-05	-0.02314	-1e-05	-0.05212	0.196149	2	Cd2-H26-C22-S2-N2-O14	0	0	equal_bothsteps	equal	0	Success at all eik	This sg doesnt have any
749	KULMIP_FSR	-0.0683	0.28851	0.20339	0	0.03004	0	4e-05	2e-05	-1e-05	0.10661	0	0.2411	-0.10575	0.17366	0.07167	0	0.11383	0	0.42192	m	C14-Cd2-H12-N4-O8	0	0	equal_bothsteps	equal	0	Success at all eik	This sg doesnt have any
750	WEMBEX_FSR	0	4e-05	1e-05	0.06559	0	0	3e-05	1e-05	-2e-05	0	0.09461	0	0.00017	0.00056	0.0001	0	0	0.11729	0.117292	222	Cd2-H20-C20-N12-Cl4-O8	0	0	equal_bothsteps	equal	0	Success at all eik	This sg doesnt have any
751	LOXZUV01_FSR	-0.00043	-0.00016	-0.00046	0.1666	0	0	0.0001	6e-05	7e-05	0	0.21191	0	0	1e-05	0	0	0	0.19776	0.21191	222	C24-Cd2-H24-O12	0	0	equal_bothsteps	equal	0	Success at all eik	This sg doesnt have any
752	RIXCIL_FSR	2e-05	0	-2e-05	-0.01574	-1e-05	-0.06382	0.02352	-0.3984	-0.00149	0	-0.06885	0	-7e-05	4e-05	-7e-05	0.09328	3e-05	-0.15304	0.404992	2	C24-Cd2-H16-N4-O12	0	0	equal_bothsteps	equal	0	Success at all eik	This sg doesnt have any
753	TUBMIO_FSR	0.0157	-0.00878	0.05561	0	-0.08032	0	-3e-05	1e-05	2e-05	-0.04546	4e-05	0.07644	-0.03032	0.04358	0.15381	0	-0.00195	0	0.172056	m	Cd2-H20-C24-I4-N8-O2	0	0	equal_bothsteps	equal	0	Success at all eik	This sg doesnt have any
754	MIKJUM_FSR	0.00025	0.00026	2e-05	0	-0.07848	0	0.00388	0.00333	-4e-05	0.05889	0	0	-0.10502	0.01389	-0.04783	0	0	0	0.116288	mm2	C28-Cd2-H16-N12-O4-S4	0	0	equal_bothsteps	equal	0	Success at all eik	This sg doesnt have any
755	XAHGAQ_FSR	-3e-05	0.00015	3e-05	0	0.05531	0	0	-7e-05	-2e-05	-0.05195	0	0	0.01728	-0.0188	0.09289	0	0	0	0.0963358	mm2	C24-Cd2-H16-N20-S4	0	0	equal_bothsteps	equal	0	Success at all eik	This sg doesnt have any
756	NAPTUU_FSR	0.00011	0.00013	0	0	0.07178	0	3e-05	3e-05	0	-0.11227	0	0	-0.01147	-0.05056	-0.00925	0	0	0	0.11227	mm2	Br4-C16-Cd2-H20-N8	0	0	equal_bothsteps	equal	0	Success at all eik	This sg doesnt have any
757	OGOWUD_FSR	-4e-05	-3e-05	-9e-05	0.01327	7e-05	0.02095	0.01434	0.06702	0.08734	0	-0.01839	0	-3e-05	-0.00013	-0.00011	0.06777	-0.00014	-0.00672	0.112534	2	Cd2-P4-H32-C26-Cl4-O18	0	0	equal_bothsteps	equal	0	Success at all eik	This sg doesnt have any
758	PALTOO_FSR	0.00042	0.00024	0	-0.01787	-1e-05	0.01072	0.08481	0.12315	0.17871	0	-0.04254	0	-0.00017	-6e-05	-9e-05	0.03153	7e-05	0.01883	0.236866	2	C24-Cd2-H18-N18-O4	0	0	equal_bothsteps	equal	0	Success at all eik	This sg doesnt have any
759	BERRUN_FSR	0.07066	0.18055	-0.04141	0	0.00945	0	4e-05	-8e-05	-4e-05	0.00634	0	0.08221	0.00431	-0.1117	-0.07316	0	-0.01355	0	0.220812	m	C16-Cd2-H24-N20-O4	0	0	equal_bothsteps	equal	0	Success at all eik	This sg doesnt have any
760	CICBOI_FSR	0	0	0	0	0.08058	0	0.0001	-5e-05	0	0.02012	0	0	-0.03191	-0.00308	-0.20668	0	0	0	0.209152	mm2	C20-Cd2-H24-N12-S4	0	0	equal_bothsteps	equal	0	Success at all eik	This sg doesnt have any
761	FIBJAE_FSR	3e-05	-0.00013	2e-05	0	0.18661	0	-1e-05	-1e-05	-1e-05	0.08756	0	0	-0.2227	-0.14596	-0.13976	0	0	0	0.30072	mm2	Cd12-H24-C12-N72-Cl8	0	0	equal_bothsteps	equal	0	Success at all eik	This sg doesnt have any
762	NAPTAA_FSR	-0.09619	0.01433	0.04893	0	-0.07449	0	5e-05	0	0	0.1075	-1e-05	0.01373	-0.16236	0.0088	0.0154	0	-0.0018	0	0.198257	m	Cd2-H20-C16-N8-Cl4	0	0	equal_bothsteps	equal	0	Success at all eik	This sg doesnt have any
763	BERSOI_FSR	1e-05	0	-3e-05	0	-0.06179	0	1e-05	5e-05	1e-05	-0.05039	0	0	-0.03962	-0.19386	-0.01399	0	0	0	0.198361	mm2	C12-Cd2-H16-N20-O4	0	0	equal_bothsteps	equal	0	Success at all eik	This sg doesnt have any
764	VEVRIZ_FSR	0.0689	0.00213	0.09734	0	0.09864	0	0	1e-05	0	-0.00907	0	0.02336	0.13284	-0.04776	0.0767	0	0.11407	0	0.245226	m	Cd2-H14-C18-S4-N6-O2	0	0	equal_bothsteps	equal	0	Success at all eik	This sg doesnt have any
765	NIYBOP_FSR	0	-1e-05	-3e-05	-0.11267	3e-05	0.12761	0.199	0.10653	0.03506	0	-0.09195	0	2e-05	0	-3e-05	0.01885	1e-05	-0.13121	0.246239	2	Cd2-H10-C22-N2-O8	0	0	equal_bothsteps	equal	0	Success at all eik	This sg doesnt have any
766	VOQBUZ_FSR	3e-05	0.00015	-2e-05	0.1511	0	0	9e-05	6e-05	-2e-05	0	-0.15109	0	2e-05	2e-05	1e-05	0	0	0	0.1511	422	C24-Cd2-H20-N4-O8	0	0	equal_bothsteps	equal	0	Success at all eik	Success at all eik
767	YEPFEF_FSR	0.00135	0.0015	-0.00015	0.07798	0.00012	-0.03206	-0.07883	0.14644	0.07338	0	0.05039	0	-0.00048	-0.00059	6e-05	0.07166	-6e-05	0.10198	0.188635	2	C30-Cd2-H26-N6-O12	0	0	equal_bothsteps	equal	0	Success at all eik	This sg doesnt have any
768	REHRAY_FSR	-0.04976	0.03434	0.09213	0	-0.02743	0	-0.00089	-0.00286	-0.00186	0.01659	-0.00103	-0.01095	-0.00551	-0.11601	-0.16863	0	-0.0096	0	0.226691	m	C26-Cd2-Cl2-H28-N10-O4	0	0	equal_bothsteps	equal	0	Success at all eik	This sg doesnt have any
769	MEKHUI_FSR	0	0	0	-0.02253	0	0.042	-0.00636	0.01699	-0.01815	0	0.0023	0	0	0	-1e-05	-0.00056	0	-0.0112	0.0486331	2	Cd2-H48-C24-N4-O8	0	0	equal_bothsteps	equal	0	Success at all eik	This sg doesnt have any
770	TAKREF_FSR	1e-05	-4e-05	-3e-05	0.03853	0	0.05696	-0.02936	0.01444	0.00272	0	0.01745	0	1e-05	-1e-05	-1e-05	-0.01345	0	-0.00597	0.0699052	2	Cd2-H36-C20-N8-O12	0	0	equal_bothsteps	equal	0	Success at all eik	This sg doesnt have any
771	JAYVOV_FSR	1e-05	3e-05	4e-05	-0.01542	-3e-05	-0.00013	-0.05775	0.024	0.02072	0	0.04986	0	9e-05	-1e-05	4e-05	0.02823	-1e-05	-0.0661	0.0826221	2	Cd2-H20-C16-S4-N10-Cl2-O4	0	0	equal_bothsteps	equal	0	Success at all eik	This sg doesnt have any
772	WACJUG01_FSR	2e-05	-2e-05	6e-05	0.0237	0	0	-1e-05	1e-05	6e-05	0	0.0237	0	0	0	1e-05	0	0	0.00696	0.0237002	-42m	Cd2-H16-C20-S2-N4-O8	0	0	equal_bothsteps	equal	0	Success at all eik	Success at all eik
773	TUNROL_FSR	-2e-05	3e-05	-3e-05	0.00479	1e-05	0.02449	0.02818	0.03327	0.12984	0	-0.0182	0	-3e-05	0.00012	0.00025	0.03621	4e-05	-0.0417	0.138169	2	Cd2-H32-C24-S2-N8-O16	0	0	equal_bothsteps	equal	0	Success at all eik	This sg doesnt have any
774	RAVLUX_FSR	0.03603	-0.00534	0.03921	0	-0.02303	0	-0.00068	0.00211	0.00165	0.00829	-0.00136	0.01775	-0.0442	-0.02373	-0.125	0	-0.00378	0	0.143069	m	C38-Cd2-H42-N4-O12-P2	0	0	equal_bothsteps	equal	0	Success at all eik	This sg doesnt have any
775	MEKHOC_FSR	0	0	-1e-05	-0.0195	0	0.02769	-0.02201	0.0061	0.0094	0	-0.01024	0	0	0	0	-0.00139	0	-0.024	0.0395036	2	Cd2-H40-C36-N4-O8	0	0	equal_bothsteps	equal	0	Success at all eik	This sg doesnt have any
776	BODXOK_FSR	0.00057	0.00059	0.00073	0	0.0105	0	-0.00017	-0.0001	-0.00025	-0.02557	0	0	0.09447	0.04649	-0.1227	0	0	0	0.161682	mm2	C44-Cd2-H36-N8-O8	0	0	equal_bothsteps	equal	0	Success at all eik	This sg doesnt have any
777	GUPDUR_FSR	-0.00012	4e-05	2e-05	-0.037	0	0	5e-05	-0.00018	-2e-05	0	-0.03701	0	0	0	0	0	0	-0.03829	0.03829	-42m	C36-Cd2-H28-N8	0	0	equal_bothsteps	equal	0	Success at all eik	Success at all eik
778	CIJNEP_FSR	0	0	0	-0.01906	0	0.0504	0.10714	-0.10452	0.00935	0	-0.01483	0	0	0	0	-0.01991	0	-0.04156	0.150701	2	Cd2-H42-C32-N14-O10	0	0	equal_bothsteps	equal	0	Success at all eik	This sg doesnt have any
779	SOMMOY_FSR	1e-05	0	1e-05	0.00499	0	0.05875	-0.01827	-0.0958	0.05478	0	0.0175	0	0	0	1e-05	0.07975	-1e-05	-0.0002	0.113219	2	Cd2-H28-C36-S2-N4-O18	0	0	equal_bothsteps	equal	0	Success at all eik	This sg doesnt have any
780	HALMOZ_FSR	0.12656	-0.02331	0.01182	0	-0.00216	0	0.00011	2e-05	0.0001	0.05481	8e-05	0.01556	0.0043	0.00744	-0.0121	0	-0.02875	0	0.129269	m	C44-Cd2-H36-N8-O8	0	0	equal_bothsteps	equal	0	Success at all eik	This sg doesnt have any
781	OCEJAK01_FSR	0.00289	0.00258	0.00154	0	0.00299	0	0	0	0	-0.00409	0	-0.0049	0.01615	0.0078	0.00213	0	0.00423	0	0.0190876	m	C56-Cd2-H40-N4-O16	0	0	equal_bothsteps	equal	0	Success at all eik	This sg doesnt have any
782	COVBOG_FSR	-1e-05	0	0	-0.09311	0	0.00645	0.04051	-0.13068	0.01296	0	-0.04487	0	0	0	0	-0.01209	0	-0.03875	0.144567	2	Cd2-H38-C30-S2-N6-O14	0	0	equal_bothsteps	equal	0	Success at all eik	This sg doesnt have any
783	PELTEG_FSR	0.24359	0.04639	0.04839	0	0.03245	0	-1e-05	-5e-05	-6e-05	-0.16833	0.00013	0.07669	0.11946	0.01421	0.10792	0	0.14177	0	0.310188	m	C6-Cd2-H20-N2-O14-P2	0	0	equal_bothsteps	equal	0	Success at all eik	This sg doesnt have any
784	VIDZEP_FSR	0.06827	-0.06457	0.02006	0	0.03802	0	0.00013	0.00042	-0.00011	0.11423	-1e-05	-0.00083	0.00239	0.12853	-0.1342	0	-0.03667	0	0.202074	m	C34-Cd2-H34-N10-O8	0	0	equal_bothsteps	equal	0	Success at all eik	This sg doesnt have any
785	SEYFAD01_FSR	-0.02385	-0.00267	-0.01433	0.0105	-0.00382	-0.00275	-0.04391	-0.011	0.06109	0.02966	-0.03654	-0.0577	-0.04992	-0.03355	0.06573	0.01498	-0.05531	-0.07234	0.165554	1	Cd2-H8-C4-O12	0	0	equal_bothsteps	equal	0	This sg doesnt have any	This sg doesnt have any
786	IGEHOS_FSR	1e-05	1e-05	1e-05	0.02778	0	-0.0083	0.00107	-0.0127	-0.01609	0	0.00192	0	0	0	0	0.00221	-1e-05	0.01365	0.0290644	2	Cd2-P4-H64-C62-Cl4-O4	0	0	equal_bothsteps	equal	0	Success at all eik	This sg doesnt have any
787	RUVBER_FSR	1e-05	-1e-05	0	0	0.02023	0	0	-1e-05	0	-0.11636	0	0	0.04194	-0.08789	-0.01241	0	0	0	0.11636	mm2	Cd2-H24-C36-N12-O8	0	0	equal_bothsteps	equal	0	Success at all eik	This sg doesnt have any
788	MAXWOA_FSR	0	0	-1e-05	-0.0027	0	-0.02159	-0.01179	0.03116	0.06496	0	0.03639	0	0	0	1e-05	0.03626	1e-05	0.0287	0.081572	2	Cd2-H46-C58-N10-O14	0	0	equal_bothsteps	equal	0	Success at all eik	This sg doesnt have any
789	OHETOL_FSR	-0.08074	0.03243	0.04413	0	-0.02485	0	-0.00012	-1e-05	-0.00011	-0.05643	-3e-05	0.00806	-0.03555	-0.0493	-0.01023	0	-0.00335	0	0.101302	m	C36-Cd2-H34-N10-O10	0	0	equal_bothsteps	equal	0	Success at all eik	This sg doesnt have any
790	NOQDII_FSR	0.11699	-0.01264	0.01558	0	0.05315	0	3e-05	-1e-05	-1e-05	-0.02702	-2e-05	0.01009	0.13661	-0.01015	-0.01256	0	0.02034	0	0.187521	m	C50-Cd2-H36-N12-O12-S2	0	0	equal_bothsteps	equal	0	Success at all eik	This sg doesnt have any
791	LIQJIE_FSR	-0.00106	-0.00047	-0.00026	-0.05276	0.00015	0.01046	-0.26975	0.02406	-0.10189	0	-0.13492	0	-0.00019	-6e-05	-4e-05	0.03097	5e-05	-0.04484	0.319264	2	C44-Cd2-H42-N6-O12-S2	0	0	equal_bothsteps	equal	0	Success at all eik	This sg doesnt have any
792	GEDLEI_FSR	-0.00088	0.03448	-0.04799	0	0.01965	0	0	0	-2e-05	0.02029	1e-05	0.01824	0.02423	-0.00692	0.01346	0	-0.03238	0	0.0686554	m	Cd2-H44-C60-N16-O8	0	0	equal_bothsteps	equal	0	Success at all eik	This sg doesnt have any
793	JUGMUV_FSR	0.12784	0.042	-0.00126	0	0.00445	0	5e-05	-1e-05	1e-05	-0.0011	1e-05	0.0912	0.03225	-0.03252	-0.03509	0	0.01336	0	0.136632	m	C36-Cd2-H26-N22	0	0	equal_bothsteps	equal	0	Success at all eik	This sg doesnt have any
794	RIHMIG_FSR	0	0	-1e-05	0	0.0999	0	0	-1e-05	-3e-05	-0.02228	0	0	0.09346	-0.05971	-0.23778	0	0	0	0.262373	mm2	C34-Cd2-H40-N8-O12-S2	0	0	equal_bothsteps	equal	0	Success at all eik	This sg doesnt have any
795	QAKDAH_FSR	0.00441	0.0016	0.00088	-0.03848	-0.00079	0.07855	0.05717	0.02289	0.00684	0	0.0079	0	-2e-05	0.00075	0.00202	0.05863	0.00064	0.01746	0.0887823	2	C56-Cd2-H40-N4-O8	0	0	equal_bothsteps	equal	0	Success at all eik	This sg doesnt have any
796	VEDVEH_FSR	-0.00016	-6e-05	-0.00018	0.02457	-0.00015	-0.0465	-0.04549	0.13309	-0.00069	0	0.04266	0	-0.0001	-3e-05	-0.00011	-0.07483	-0.00012	-0.00053	0.146978	2	C34-Cd2-H32-O14	0	0	equal_bothsteps	equal	0	Success at all eik	This sg doesnt have any
797	HEYDUL_FSR	-0.00548	0.01575	0.00174	0	-0.00057	0	0	-1e-05	0	-0.01331	0	0.00757	0.01822	-0.01837	0.00934	0	0.02503	0	0.0388024	m	Cd2-H40-C34-N8-O10	0	0	equal_bothsteps	equal	0	Success at all eik	This sg doesnt have any
798	LIDZAB_FSR	0	0	1e-05	-0.01657	1e-05	-0.03441	-0.07429	-0.01782	0.0282	0	-0.00596	0	1e-05	0	0	0.03371	0	-0.02866	0.0816536	2	Cd2-H40-C36-N16-O8	0	0	equal_bothsteps	equal	0	Success at all eik	This sg doesnt have any
799	NUYWEK_FSR	0.05118	-0.06218	0.05115	-0.0245	-0.01785	0.05231	0.07048	0.05175	-0.04301	-0.00017	-0.03242	-0.04654	-0.04461	-0.0422	0.00273	-0.03895	-0.02547	-0.02953	0.130595	1	Cd2-H28-C40-N8-O8	0	0	equal_bothsteps	equal	0	This sg doesnt have any	This sg doesnt have any
800	AQANOW01_FSR	0.23346	0.09114	0.09269	0	0.17947	0	-3e-05	-1e-05	-1e-05	-0.01501	0	0.02299	0.22025	-0.00462	-0.06521	0	0.00632	0	0.361716	m	Cd2-H40-C44-N8-O12	0	0	equal_bothsteps	equal	0	Success at all eik	This sg doesnt have any
801	GEDKUX_FSR	0	3e-05	2e-05	0	-0.07838	0	-0.00023	-4e-05	-0.00019	0.0718	0	0	-0.1038	0.04624	-0.00122	0	0	0	0.11364	mm2	C40-Cd2-H32-N12-O8	0	0	equal_bothsteps	equal	0	Success at all eik	This sg doesnt have any
802	FEQSOK_FSR	0.00015	-8e-05	7e-05	-0.07586	0	0	0.00011	-0.00011	-3e-05	0	0.07597	0	0	0	0	0	0	0	0.0759702	422	C52-Cd2-H36-N4-O16	0	0	equal_bothsteps	equal	0	Success at all eik	Success at all eik
803	ZASJAG_FSR	0.03866	-0.04863	0.03455	0	0.02535	0	-9e-05	-9e-05	-8e-05	-0.10403	-3e-05	-0.09598	0.07442	-0.03136	0.08284	0	0.05041	0	0.144108	m	C48-Cd2-H28-N4-O8	0	0	equal_bothsteps	equal	0	Success at all eik	This sg doesnt have any
804	HOQPUZ_FSR	-2e-05	1e-05	0	-0.07149	2e-05	-0.0442	0.10118	-0.14426	0.03536	0	-0.05963	0	0	0	0	-0.01233	0	-0.01826	0.189353	2	Cd2-H38-C30-S4-N6-O14	0	0	equal_bothsteps	equal	0	Success at all eik	This sg doesnt have any
805	ACOHAE_FSR	0.12928	-0.05778	0.14775	0	0.02084	0	0.00171	0.00053	-0.00171	-0.00495	0.00022	0.01038	0.09641	0.11533	-0.08368	0	0.07775	0	0.212002	m	C40-Cd2-H36-N8-O10	0	0	equal_bothsteps	equal	0	Success at all eik	This sg doesnt have any
806	JOMVIQ_FSR	-0.00288	-0.00299	0.00104	0	0.12887	0	-7e-05	-3e-05	0	-0.03705	0	0	0.09408	-0.02086	0.13762	0	0	0	0.168005	mm2	C56-Cd2-H40-N4-O8	0	0	equal_bothsteps	equal	0	Success at all eik	This sg doesnt have any
807	ABIWUF_FSR	0	0	-1e-05	0.08202	0	0	0	-1e-05	-2e-05	0	0.02389	0	-3e-05	0	-0.00033	0	0	0.05166	0.08202	222	Cd2-H56-C56-I4-N4-O4	0	0	equal_bothsteps	equal	0	Success at all eik	This sg doesnt have any
808	JUKXIW01_FSR	0.14402	-0.07333	0.02156	0	-0.02841	0	0.00016	0.00019	0.00026	-0.04062	9e-05	-0.01235	-0.00873	-0.011	-0.03604	0	0.01468	0	0.165819	m	C32-Cd2-H24-N4-O8	0	0	equal_bothsteps	equal	0	Success at all eik	This sg doesnt have any
809	DUKYOZ_FSR	0	1e-05	0	0	-0.02627	0	0	0	0	-0.02148	0	0	-0.01966	-0.05243	-0.00607	0	0	0	0.0563229	mm2	Cd2-H40-C44-N8	0	0	equal_bothsteps	equal	0	Success at all eik	This sg doesnt have any
810	OGAPIY_FSR	0.00049	0.0012	0.00028	0.04636	0.00099	0.00052	0.00243	0.00718	0.01263	0	0.00613	0	0	0.00022	-1e-05	0.01517	-0.00012	-0.01601	0.0490343	2	Cd2-H28-C44-N24-O8	0	0	equal_bothsteps	equal	0	Success at all eik	This sg doesnt have any
811	POGZUH_FSR	0.0957	-0.04186	-0.04786	0	0.03578	0	0.001	0.00037	8e-05	-0.06675	0.00045	-0.00452	0.05056	-0.00447	-0.01359	0	-0.00575	0	0.129009	m	C68-Cd2-H44-N8-O8	0	0	equal_bothsteps	equal	0	Success at all eik	This sg doesnt have any
812	JOLSEK_FSR	0	0	0	-0.00895	-2e-05	-0.00841	0.00354	0.04946	-0.00763	0	-0.00181	0	-1e-05	-1e-05	0	-0.01465	4e-05	0.03787	0.0502028	2	Cd2-P4-H68-C60-N4-O12	0	0	equal_bothsteps	equal	0	Success at all eik	This sg doesnt have any
813	PINKOP_FSR	5e-05	1e-05	0	-0.02835	2e-05	-0.04391	0.04802	-0.11801	-0.03435	0	-0.02445	0	0	-1e-05	0	-0.08	0	-0.06052	0.134201	2	Cd2-H20-C44-N8-O16-F8	0	0	equal_bothsteps	equal	0	Success at all eik	This sg doesnt have any
814	GISJUO01_FSR	0	0	0	0	-0.01759	0	5e-05	4e-05	7e-05	-0.02533	0	0	-0.01049	-0.2252	-0.07651	0	0	0	0.238073	mm2	Cd4-H36-C28-N4-O28	0	0	equal_bothsteps	equal	0	Success at all eik	This sg doesnt have any
815	AFAVUA_FSR	0	0	0	0	0.09406	0	-0.0001	-7e-05	-4e-05	0.13547	0	0	0.06745	0.28081	-0.2631	0	0	0	0.390673	mm2	Cd4-H36-C16-N4-O24	0	0	equal_bothsteps	equal	0	Success at all eik	This sg doesnt have any
816	TUMGAJ_FSR	-4e-05	2e-05	0	-0.02773	0	0	0	0	0	0	-0.0213	0	0	0	0	0	0	-0.06416	0.06416	222	Cd4-H44-C24-N4-Cl8-O8	0	0	equal_bothsteps	equal	0	Success at all eik	This sg doesnt have any
817	XELHUT_FSR	0.00018	0.00011	0.00036	-0.11077	0	0	0	-1e-05	0	0	-0.06078	0	0	0	0	0	0	-0.05873	0.110771	222	Cd4-H28-C32-I8-N20	0	0	equal_bothsteps	equal	0	Success at all eik	This sg doesnt have any
818	NOPFAA_FSR	-0.00798	0.00134	0.00107	0	0.04869	0	0.0001	-8e-05	1e-05	0.03729	0	0	0.00804	-0.02999	-0.01934	0	0	0	0.0495114	mm2	C28-Cd4-H24-N16-S8	0	0	equal_bothsteps	equal	0	Success at all eik	This sg doesnt have any
819	NOBLUM01_FSR	0.00035	0.00039	-0.00011	0.03387	0	0	0	0	-1e-05	0	-0.0104	0	0	0	0	0	0	-0.11084	0.11084	222	Cd4-H24-C24-S12-N8-O20	0	0	equal_bothsteps	equal	0	Success at all eik	This sg doesnt have any
820	NAMDAH_FSR	0	0	0	-0.00803	0	0	-1e-05	0	0	0	0.04133	0	0	0	0	0	0	0.02121	0.04133	222	Cd4-H36-C20-S4-N4-O20	0	0	equal_bothsteps	equal	0	Success at all eik	This sg doesnt have any
821	MUFHAX_FSR	0	0	0	0	0.12426	0	2e-05	-2e-05	3e-05	0.02342	0	0	0.12913	0.04643	0.06107	0	0	0	0.150199	mm2	C24-Cd4-H20-N36	0	0	equal_bothsteps	equal	0	Success at all eik	This sg doesnt have any
822	DAYVEF_FSR	0	0	0	0	-0.03917	0	0	0	0	-0.0007	0	0	-0.09743	-0.04233	0.29369	0	0	0	0.312311	mm2	Cd4-H40-C28-S4-N8-O20	0	0	equal_bothsteps	equal	0	Success at all eik	This sg doesnt have any
823	DOZZOI_FSR	1e-05	0	-2e-05	0	-0.04178	0	0	1e-05	1e-05	-0.12089	0	0	0.12165	0.06615	0.05478	0	0	0	0.148914	mm2	C20-Cd4-H32-N16-O4-S8	0	0	equal_bothsteps	equal	0	Success at all eik	This sg doesnt have any
824	OYEJAE_FSR	0	0	0	0.14297	0	0	0	0	0	0	0.11241	0	0	0	0	0	0	0.19271	0.19271	222	Cd4-H40-C24-S8-N16	0	0	equal_bothsteps	equal	0	Success at all eik	This sg doesnt have any
825	XECMUP_FSR	0	0	0	0.01634	0	0.00104	-0.01622	0.06635	0.042	0	0.01243	0	0	0	-1e-05	0.04171	0	0.00211	0.0811413	2	Cd4-H56-C24-I8-N8	0	0	equal_bothsteps	equal	0	Success at all eik	This sg doesnt have any
826	NURYOO01_FSR	5e-05	-3e-05	-1e-05	0	0.90857	0	0	1e-05	0	0.11872	0	0	0.00586	0.14117	-0.01173	0	0	0	0.90857	mm2	Cd4-H28-C12-N4-Cl8-O8	0	0	equal_bothsteps	equal	0	Success at all eik	This sg doesnt have any
827	NEQNAZ02_FSR	-0.0002	-0.00016	-6e-05	0.08204	0	0	0	1e-05	0	0	0.00141	0	0	0	-1e-05	0	0	-0.02557	0.0820404	222	Cd4-H32-C24-N8-O28	0	0	equal_bothsteps	equal	0	Success at all eik	This sg doesnt have any
828	BIWTOR_FSR	0	0	0	0	0.04552	0	-2e-05	1e-05	-1e-05	-0.01064	0	0	0.03549	-0.00365	-0.10055	0	0	0	0.106692	mm2	Cd4-H40-C28-Se8-S4-N16	0	0	equal_bothsteps	equal	0	Success at all eik	This sg doesnt have any
829	GEZSIQ_FSR	2e-05	-1e-05	2e-05	0	-0.064	0	-0.00059	0.00033	0.00048	-0.04786	0	0	-0.05112	-0.00526	0.04558	0	0	0	0.0686986	mm2	C28-Cd4-Cl4-H20-N24-S4	0	0	equal_bothsteps	equal	0	Success at all eik	This sg doesnt have any
830	FODBUX_FSR	0	0	-1e-05	-0.03019	0	-0.00491	-0.05542	-0.17134	0.00748	0	0.00919	0	-1e-05	-2e-05	0	0.01124	0	-0.01721	0.180469	2	C52-Cd3-H46-N8-O14	0	0	equal_bothsteps	equal	0	Success at all eik	This sg doesnt have any
831	APORUS_FSR	0.00253	-0.00021	0.00186	0	0.00159	0	1e-05	0	0	0.00046	0	-1e-05	0.00019	-0.00078	-0.00107	0	0.00052	0	0.00352968	m	Cd4-H56-C28-S8-N16-O16	0	0	equal_bothsteps	equal	0	Success at all eik	This sg doesnt have any
832	YEDVUZ_FSR	1e-05	-1e-05	-2e-05	0.00776	0	0	3e-05	3e-05	-4e-05	0	-0.00157	0	-1e-05	1e-05	3e-05	0	0	-0.01169	0.01169	222	Cd4-H28-C20-N4-Cl8-O8	0	0	equal_bothsteps	equal	0	Success at all eik	This sg doesnt have any
833	BUXBUR_FSR	-2e-05	0	2e-05	-0.07183	0	0	0	0	0	0	-0.02032	0	0	0	0	0	0	0.03631	0.07183	222	Cd4-H36-C20-N4-Cl8-O8	0	0	equal_bothsteps	equal	0	Success at all eik	This sg doesnt have any
834	AGUTEC_FSR	0.05751	-0.25918	-0.09553	0	-0.05188	0	-0.00163	0.00129	0.00369	0.33677	-0.00033	-0.19681	-0.17761	-0.01527	0.23383	0	0.03435	0	0.390148	m	Br8-C16-Cd2-Cu2-H28-N24-O6	2	2	equal_bothsteps	equal	2	Success at all eik	This sg doesnt have any
835	CIZMOP_FSR	-0.00074	4e-05	-0.00045	-0.00998	0.00012	0.01578	0.15427	-0.00388	0.02972	0	-0.09805	0	0.00012	3e-05	1e-05	-0.00862	-2e-05	-0.07115	0.185235	2	C60-Cd3-H42-N12-O16	0	0	equal_bothsteps	equal	0	Success at all eik	This sg doesnt have any
836	CECSAF_FSR	0	0	2e-05	0	0.04106	0	-1e-05	0	6e-05	0.00059	0	0	-0.02056	-0.03186	0.06121	0	0	0	0.0720031	mm2	Cd4-H32-C32-N24-O24	0	0	equal_bothsteps	equal	0	Success at all eik	This sg doesnt have any
837	OXAZUK_FSR	-2e-05	6e-05	0	0.01467	0	0	0	6e-05	-1e-05	0	0.06064	0	-2e-05	-3e-05	-4e-05	0	0	-0.00651	0.06064	222	Cd4-H20-C24-S4-N12-Cl8	0	0	equal_bothsteps	equal	0	Success at all eik	This sg doesnt have any
838	QAFFOV_FSR	0	1e-05	0	0	0.11058	0	0	-2e-05	-1e-05	-0.08649	0	0	0.15627	-0.09813	0.17159	0	0	0	0.251978	mm2	Cd4-H24-C36-N12-Cl4-O8	0	0	equal_bothsteps	equal	0	Success at all eik	This sg doesnt have any
839	MOGVEK_FSR	0	-2e-05	-1e-05	0.06639	0	0	0	0	0	0	-0.09785	0	0	0	0	0	0	-0.06619	0.09785	222	Cd4-H12-C8-Br4-N16	0	0	equal_bothsteps	equal	0	Success at all eik	This sg doesnt have any
840	FIRXIP_FSR	2e-05	0.0001	0	-0.12421	-2e-05	-0.03004	-0.10219	-0.42641	-0.07082	0	-0.03335	0	0	-9e-05	-5e-05	-0.16035	0	-0.17137	0.445417	2	Cd2-H20-C8-O18	0	0	equal_bothsteps	equal	0	Success at all eik	This sg doesnt have any
841	WIVBUB_FSR	0.06597	-0.06574	-9e-05	0.00676	0	0	0.00012	-0.00016	1e-05	3e-05	-0.00658	-0.06646	-1e-05	-1e-05	-1e-05	0	0	0	0.0933787	32	Cd3-H60-C54-N12-O21	0	0	equal_bothsteps	equal	0	Success at all eik	Success at all eik
842	MERFAT_FSR	0.00018	3e-05	0.0001	0.02543	0	0	0	0	0	0	0.19017	0	0	0	0	0	0	0.08444	0.19017	222	Cd4-H28-C24-N12-O20	0	0	equal_bothsteps	equal	0	Success at all eik	This sg doesnt have any
843	CDACET01_FSR	0	0	0	-0.11356	0	0	0	0	0	0	0.06897	0	0	0	0	0	0	-0.12997	0.12997	222	Cd4-H40-C16-O24	0	0	equal_bothsteps	equal	0	Success at all eik	This sg doesnt have any
844	HOZXOL_FSR	0	0	0	0.03383	0	0	0	0	0	0	0.04634	0	-5e-05	-2e-05	0	0	0	0.06854	0.06854	222	Br2-C10-Cd4-Cl6-H12-N4-O8	0	0	equal_bothsteps	equal	0	Success at all eik	This sg doesnt have any
845	HEWWAK_FSR	-0.00011	0.00229	0.00025	0	-0.03999	0	0.00146	0.00342	0.00038	-0.04416	0	0	-0.08651	-0.01822	-0.49484	0	0	0	0.502676	mm2	C32-Cd4-H16-N16-O16	0	0	equal_bothsteps	equal	0	Success at all eik	This sg doesnt have any
846	NARLEZ_FSR	1e-05	1e-05	-1e-05	0.13041	0	-0.10831	-0.01602	-0.14664	0.01821	0	-0.05182	0	1e-05	-1e-05	-1e-05	-0.05971	0	0.04708	0.185786	2	Cd2-Mo4-H28-C12-S8-N4-O16	0	0	equal_bothsteps	equal	0	Success at all eik	This sg doesnt have any
847	MOVDUW_FSR	0	0	0	-0.09057	0	0	0	0	0	0	-0.02618	0	0	0	0	0	0	0.13107	0.13107	222	Cd4-H24-C16-N8-O28	0	0	equal_bothsteps	equal	0	Success at all eik	This sg doesnt have any
848	NOBMAT_FSR	-0.00031	-0.00017	-5e-05	0.10291	0	0	0	0	3e-05	0	0.06709	0	0	0	1e-05	0	0	0.06312	0.102911	222	Cd4-H16-C24-S12-N8-O16	0	0	equal_bothsteps	equal	0	Success at all eik	This sg doesnt have any
849	EDABAO_FSR	0	0	0	0	0.00287	0	-1e-05	2e-05	0	0.0147	0	0	-0.08103	-0.04243	-0.03884	0	0	0	0.0993716	mm2	Cd4-H16-C24-I4-N4-O8	0	0	equal_bothsteps	equal	0	Success at all eik	This sg doesnt have any
850	PODJAV_FSR	-0.05625	0.05625	3e-05	0.01439	0	0	-0.00281	0.00225	-0.0001	-0.00048	-0.01358	0.056	0	0	-7e-05	0	0	0	0.0809883	32	Cd3-H24-C30-S12-N30	0	0	equal_bothsteps	equal	0	Success at all eik	Success at all eik
851	WUBWAT_FSR	-1e-05	-6e-05	3e-05	0.03614	0	0	0	0	0	0	-0.04895	0	0	0	0	0	0	0.00677	0.04895	222	Cd4-H36-C20-Br8-N4-O8	0	0	equal_bothsteps	equal	0	Success at all eik	This sg doesnt have any
852	GIRGEV_FSR	0	-4e-05	-1e-05	0	0.01256	0	-2e-05	1e-05	1e-05	-0.01404	0	0	-0.02792	0.07659	0.02089	0	0	0	0.0841543	mm2	Cd4-H16-C12-Br8-N8	0	0	equal_bothsteps	equal	0	Success at all eik	This sg doesnt have any
853	BELXUN_FSR	1e-05	0	1e-05	0	0.29916	0	0	0	1e-05	-0.70234	0	0	0.12019	-0.06082	0.06585	0	0	0	0.70234	mm2	C32-Cd4-H24-N16-O8	0	0	equal_bothsteps	equal	0	Success at all eik	This sg doesnt have any
854	KOGHEU_FSR	2e-05	0.00015	2e-05	0.04673	0	0	0	1e-05	0	0	-0.05543	0	0	0	0	0	0	0.06826	0.06826	222	Cd4-H16-C16-O20	0	0	equal_bothsteps	equal	0	Success at all eik	This sg doesnt have any
855	EGEBEY_FSR	-7e-05	-0.00011	-0.00023	0.02094	0	0	0	0	0	0	-0.10294	0	0	0	0	0	0	0.02493	0.10294	222	Cd4-H20-C12-S4-N4-O8	0	0	equal_bothsteps	equal	0	Success at all eik	This sg doesnt have any
856	AXUVEW_FSR	4e-05	0	0	-0.00356	-1e-05	0.10527	0.15157	0.06826	0.07436	0	-0.01385	0	1e-05	5e-05	4e-05	0.03034	2e-05	0.04832	0.182631	2	Cd4-H12-C18-N14-Cl6	0	0	equal_bothsteps	equal	0	Success at all eik	This sg doesnt have any
857	CLIMZC_FSR	-0.0015	-0.00178	-0.0032	0	-0.00035	0	0	0	0	0.01747	1e-05	-0.00364	0.03698	-0.07761	-0.01841	0	-0.00012	0	0.0879339	mm2	Cd4-H16-C12-N8-Cl8	0	0	equal_bothsteps	equal	0	Success at all eik	This sg doesnt have any
858	FAPFIN_FSR	0	-2e-05	-1e-05	0.05947	0	0	0	1e-05	0	0	0.02871	0	4e-05	5e-05	7e-05	0	0	0.00827	0.05947	222	Cd4-H24-C32-S8-N20	0	0	equal_bothsteps	equal	0	Success at all eik	This sg doesnt have any
859	WOFWIX_FSR	0.03819	0.09682	0.00811	-0.00811	-0.03137	0.04319	0.01887	-0.15909	0.03098	-0.00509	-0.00196	0.01732	-0.05784	-0.05973	-0.00143	0.0034	-0.03245	-0.01855	0.19847	1	Cd3-H24-C36-N12	0	0	equal_bothsteps	equal	0	This sg doesnt have any	This sg doesnt have any
860	CDLGLU10_FSR	-0.0001	-9e-05	2e-05	0.10659	0	0	-1e-05	0	0	0	0.08586	0	0	0	0	0	0	0.1652	0.1652	222	Cd4-H36-C20-N4-O20	0	0	equal_bothsteps	equal	0	Success at all eik	This sg doesnt have any
861	JIVXUH_FSR	1e-05	0	1e-05	0.02633	0	0	1e-05	0	0	0	0.024	0	0	-1e-05	0	0	0	0.00679	0.02633	222	Cd4-H60-C28-S8-N20	0	0	equal_bothsteps	equal	0	Success at all eik	This sg doesnt have any
862	REGLUM_FSR	-0.00012	-5e-05	2e-05	0.02853	-4e-05	0.17071	0.18976	0.23914	0.09322	0	0.10372	0	1e-05	2e-05	3e-05	0.00464	-4e-05	0.21201	0.335626	2	Cd4-H20-C16-O26	0	0	equal_bothsteps	equal	0	Success at all eik	This sg doesnt have any
863	QIVBUT_FSR	-2e-05	-3e-05	-3e-05	-0.01189	0	0	2e-05	7e-05	2e-05	0	-0.01733	0	1e-05	0	3e-05	0	0	-0.00609	0.0173302	222	Cd2-Fe2-H48-C60-S4-N8-O12	0	0	equal_bothsteps	equal	0	Success at all eik	This sg doesnt have any
864	GUPCOK01_FSR	-0.02661	0.0266	2e-05	0.00376	0	0	1e-05	-1e-05	0	-8e-05	-0.00386	0.02669	-1e-05	-1e-05	-2e-05	0	0	0	0.0378126	32	Cd3-H42-C30-N12	0	0	equal_bothsteps	equal	0	Success at all eik	Success at all eik
865	LOYBEI_FSR	0	0	0	0.05427	0	-0.01123	0.02503	-0.09536	-0.01759	0	0.00888	0	-1e-05	0	-1e-05	0.04101	1e-05	0.08439	0.10054	2	Cd4-H48-C48-O24	0	0	equal_bothsteps	equal	0	Success at all eik	This sg doesnt have any
866	WETFEJ_FSR	-1e-05	1e-05	0	0	0.13798	0	0	-1e-05	0	0.09222	0	0	0.06845	0.04098	0.10969	0	0	0	0.13798	mm2	C44-Cd4-H28-N16-O8	0	0	equal_bothsteps	equal	0	Success at all eik	This sg doesnt have any
867	JAGNEN_FSR	-0.01694	-0.04666	0.01374	-0.0491	0.02954	-0.05605	-0.05629	0.00099	0.00239	0.00045	-0.00676	-0.04401	-0.04571	0.00913	-0.09139	-0.02786	0.03552	-0.03023	0.130113	1	Cd4-H40-C44-N4-O20	0	0	equal_bothsteps	equal	0	This sg doesnt have any	This sg doesnt have any
868	ROGROV_FSR	1e-05	-1e-05	-1e-05	0	0.03709	0	-1e-05	-3e-05	-1e-05	0.00323	0	0	-0.01999	-0.08684	-0.06931	0	0	0	0.112892	mm2	C64-Cd4-H48-N8-O24	0	0	equal_bothsteps	equal	0	Success at all eik	This sg doesnt have any
869	INODUL_FSR	2e-05	-0.00015	-8e-05	0	0.02516	0	1e-05	-1e-05	3e-05	0.03126	0	0	0.06099	0.10789	0.13512	0	0	0	0.183351	mm2	Cd4-H36-C40-N12-O24	0	0	equal_bothsteps	equal	0	Success at all eik	This sg doesnt have any
870	EJIHEM_FSR	0	0	0	-0.02037	0	0	-1e-05	-2e-05	-1e-05	0	-0.03315	0	-1e-05	-1e-05	0	0	0	-0.06392	0.06392	222	Cd4-H48-C56-S8-N16-O8	0	0	equal_bothsteps	equal	0	Success at all eik	This sg doesnt have any
871	BUSJOR_FSR	0	0	-2e-05	0	-0.05316	0	-1e-05	-1e-05	0	-0.04604	0	0	-0.04555	-0.01238	0.03298	0	0	0	0.0575825	mm2	Cd4-H64-C48-N24	0	0	equal_bothsteps	equal	0	Success at all eik	This sg doesnt have any
872	LALTIC_FSR	1e-05	-2e-05	-5e-05	0	0.03052	0	1e-05	2e-05	-1e-05	-0.02575	0	0	0.02977	-0.01869	0.06373	0	0	0	0.0727811	mm2	C64-Cd4-H48-N8-O20-S4	0	0	equal_bothsteps	equal	0	Success at all eik	This sg doesnt have any
873	HULFOL_FSR	1e-05	0	0	0	0.02819	0	0.00029	1e-05	4e-05	-0.05094	0	0	0.03881	0.03948	0.12001	0	0	0	0.132164	mm2	Cd4-H32-C56-I12-N20-O16	0	0	equal_bothsteps	equal	0	Success at all eik	This sg doesnt have any
874	YARYOF_FSR	0.02009	-0.00287	-0.02234	0	0.00311	0	2e-05	2e-05	2e-05	0.03969	1e-05	-0.0322	-0.01041	0.02789	0.04376	0	-0.03348	0	0.066738	m	C36-Cd4-H44-N16	0	0	equal_bothsteps	equal	0	Success at all eik	This sg doesnt have any
875	DIYTAI_FSR	0	0	0	-0.03135	0	0.03099	0.04619	0.00923	0.03865	0	-0.00411	0	0	0	0	0.03074	0	-0.02284	0.061069	2	Cd4-H48-C52-N8-O20	0	0	equal_bothsteps	equal	0	Success at all eik	This sg doesnt have any
876	MASZEL_FSR	0.00014	8e-05	0.00012	0.06181	0	0	0	0	0	0	0.05177	0	-1e-05	-2e-05	-2e-05	0	0	0.00638	0.0618103	222	Cd4-H48-C48-S4-N8-O24	0	0	equal_bothsteps	equal	0	Success at all eik	This sg doesnt have any
877	COXQUB_FSR	0.00063	0.00026	3e-05	0.01082	8e-05	0.06102	0.03666	-0.04604	-0.05998	0	0.00506	0	2e-05	0.00013	0.00021	-0.10189	3e-05	-0.12509	0.170457	2	C40-Cd4-H44-N8-O22-S4	0	0	equal_bothsteps	equal	0	Success at all eik	This sg doesnt have any
878	FIQZEM_FSR	1e-05	3e-05	1e-05	-0.14137	0	0	0	2e-05	2e-05	0	-0.01379	0	-1e-05	-1e-05	0	0	0	0.01059	0.14137	222	Cd4-H52-C60-N4-O20	0	0	equal_bothsteps	equal	0	Success at all eik	This sg doesnt have any
879	INIZEK_FSR	0.00015	0.00014	3e-05	0.09381	0	0	-5e-05	-3e-05	-1e-05	0	0.04477	0	0	-3e-05	0	0	0	0.04659	0.0938102	222	Cd4-H32-C48-S8-N8-O12	0	0	equal_bothsteps	equal	0	Success at all eik	This sg doesnt have any
880	PONTET_FSR	1e-05	1e-05	4e-05	0	-0.15297	0	-0.00045	-0.00038	-0.00087	0.04019	0	0	-0.11105	0.23961	0.01496	0	0	0	0.264516	mm2	C60-Cd4-H40-O24	0	0	equal_bothsteps	equal	0	Success at all eik	This sg doesnt have any
881	INOXUE_FSR	-0.00062	-0.00041	-0.00029	-0.04047	0	0	0.00011	7e-05	5e-05	0	0.01458	0	0.00024	6e-05	0.00012	0	0	0.05052	0.0505207	222	Cd4-H36-C40-N20-O8	0	0	equal_bothsteps	equal	0	Success at all eik	This sg doesnt have any
882	TOFQEM_FSR	0	-1e-05	-1e-05	0	0.01051	0	-2e-05	5e-05	-1e-05	-0.00156	0	0	0.00041	-0.02608	0.01088	0	0	0	0.0282615	mm2	Cd4-H40-C48-N8-O20	0	0	equal_bothsteps	equal	0	Success at all eik	This sg doesnt have any
883	ROQJIS_FSR	1e-05	1e-05	0	0	0.07945	0	0	0	1e-05	0.0601	0	0	-0.01402	0.02818	0.0577	0	0	0	0.07945	mm2	C36-Cd4-H40-N8-O24	0	0	equal_bothsteps	equal	0	Success at all eik	This sg doesnt have any
884	PAYMIN_FSR	0	0	0	-0.02392	0	0	0	0	0	0	-0.03292	0	0	0	-1e-05	0	0	-0.04173	0.04173	222	Cd4-H48-C36-N16-Cl8	0	0	equal_bothsteps	equal	0	Success at all eik	This sg doesnt have any
885	LAGTEU_FSR	1e-05	8e-05	-6e-05	-0.18801	0	0	0	1e-05	1e-05	0	-0.1103	0	0	0	0	0	0	-0.04199	0.18801	222	Cd4-H40-C44-N8-O20	0	0	equal_bothsteps	equal	0	Success at all eik	This sg doesnt have any
886	FIJNOC_FSR	-0.00376	0.11157	-0.08694	0	-0.01812	0	8e-05	0.00012	0.00014	0.10172	8e-05	0.03506	-0.00246	0.10753	-0.16365	0	-0.04465	0	0.243266	m	C48-Cd4-H40-N24-O32	0	0	equal_bothsteps	equal	0	Success at all eik	This sg doesnt have any
887	CAKFAY_FSR	2e-05	1e-05	1e-05	0	-0.08101	0	0	0	0	0.01522	0	0	0.00832	-0.01333	-0.06081	0	0	0	0.08101	mm2	Cd4-H32-C48-N8-O16	0	0	equal_bothsteps	equal	0	Success at all eik	This sg doesnt have any
888	BOYFUS_FSR	0.00132	0.00077	0.00036	0	-0.06674	0	0.00179	0.00121	0.00042	-0.03945	0	0	0.03063	-0.08088	-0.29517	0	0	0	0.30758	mm2	C40-Cd4-H20-N12-O16	0	0	equal_bothsteps	equal	0	Success at all eik	This sg doesnt have any
889	DALVAQ_FSR	-0.00052	-0.00075	2e-05	0	0.08978	0	0	0	0	-0.00435	0	0	0.09317	0.04013	0.02412	0	0	0	0.104283	mm2	Cd4-H40-C48-N8-O20	0	0	equal_bothsteps	equal	0	Success at all eik	This sg doesnt have any
890	NEBMEP_FSR	6e-05	-4e-05	6e-05	0.0595	0	0	-2e-05	-5e-05	-5e-05	0	-0.01211	0	0	-1e-05	-1e-05	0	0	-0.01282	0.0595001	222	Cd4-H44-C68-N4-O16	0	0	equal_bothsteps	equal	0	Success at all eik	This sg doesnt have any
891	QAWSUD_FSR	0	-1e-05	0	0.01276	0	0.00369	-0.01428	-0.01038	0.04202	0	0.00527	0	-1e-05	0	1e-05	0.0135	0	0.00236	0.0458815	2	Cd4-H40-C40-N20-Cl12-O4	0	0	equal_bothsteps	equal	0	Success at all eik	This sg doesnt have any
892	KIKBIR_FSR	0	0	0	-0.0489	0	0	0	0	0	0	-0.04045	0	-1e-05	0	0	0	0	-0.0669	0.0669	222	Cd4-H32-C48-S8-N40-O8	0	0	equal_bothsteps	equal	0	Success at all eik	This sg doesnt have any
893	MOGVIO_FSR	-9e-05	-3e-05	-0.00031	0	-0.12672	0	0	0	0	0.02237	0	0	-0.08361	-0.15833	-0.18317	0	0	0	0.256145	mm2	Cd4-H16-C8-S4-N16-O16	0	0	equal_bothsteps	equal	0	Success at all eik	This sg doesnt have any
894	PORZON_FSR	0.01121	-0.03924	0.07454	0	0.08707	0	1e-05	8e-05	0	0.03539	1e-05	0.01078	0.03948	0.00018	0.05832	0	0.02837	0	0.13722	m	C48-Cd4-H56-N4-O24	0	0	equal_bothsteps	equal	0	Success at all eik	This sg doesnt have any
895	JOJGOG_FSR	-5e-05	0.00024	-2e-05	0	0.00827	0	0	2e-05	1e-05	-0.11037	0	0	-0.09681	-0.05895	-0.04974	0	0	0	0.123779	mm2	Cd4-H32-C56-N8-O36	0	0	equal_bothsteps	equal	0	Success at all eik	This sg doesnt have any
896	LUWYAE_FSR	-0.00015	-0.00013	0.00042	0.02452	0	0	0	-2e-05	-2e-05	0	0.03954	0	-2e-05	3e-05	-2e-05	0	0	0.0497	0.0497	222	Cd4-H36-C52-N4-O24-F16	0	0	equal_bothsteps	equal	0	Success at all eik	This sg doesnt have any
897	KIJWIL_FSR	0.08367	0.01722	-0.03952	0	0.04197	0	1e-05	0	1e-05	-0.00925	6e-05	0.00209	-0.00428	-0.0134	-0.00498	0	-0.04133	0	0.105419	m	Cd4-H52-C60-N12-O20	0	0	equal_bothsteps	equal	0	Success at all eik	This sg doesnt have any
898	NAPZOV_FSR	0	1e-05	0	0	0.03256	0	0	1e-05	0	0.00321	0	0	0.0497	0.0759	-0.00499	0	0	0	0.0908614	mm2	Cd4-H52-C48-N4-O20	0	0	equal_bothsteps	equal	0	Success at all eik	This sg doesnt have any
899	CEKYEY_FSR	0	0	0	0	-0.02579	0	0	0	0	-0.02476	0	0	-0.08259	-0.05961	0.14622	0	0	0	0.178199	mm2	Cd4-H40-C48-N8-O24	0	0	equal_bothsteps	equal	0	Success at all eik	This sg doesnt have any
900	EMOTIK_FSR	0	0	0	0.00021	0	0	0	-1e-05	-1e-05	0	-0.08494	0	1e-05	0	0	0	0	0.00273	0.08494	222	Cd4-H48-C44-N8-O16	0	0	equal_bothsteps	equal	0	Success at all eik	This sg doesnt have any
901	AVUJOQ_FSR	1e-05	-1e-05	0	0	0.11604	0	-1e-05	1e-05	0	-0.11604	0	0	0.32601	-0.32601	0	0	0	0	0.461048	-42m	Cd4-H24-C48-N8-O16	0	0	equal_bothsteps	equal	0	Success at all eik	Success at all eik
902	GUPCUQ02_FSR	5e-05	-0.00011	4e-05	-0.00062	0	0	-0.00124	0.00035	-0.00081	0	-0.00335	0	0	0	0	0	0	-0.03262	0.03262	-42m	C36-Cd6-H24-N36-O24	0	0	equal_bothsteps	equal	0	Success at all eik	Failed at e25
903	CUTVET_FSR	-4e-05	-4e-05	-5e-05	-0.00023	-0.05735	-0.03644	-0.03609	0.03685	0.00042	-0.05686	0	0	0.07368	0.07368	0.16995	0	0	0	0.199351	3m	C48-Cd6-H36-N24-O24	0	0	equal_bothsteps	equal	0	Success at all eik	Success at all eik
904	YIWKUN_FSR	-0.02397	0.00731	-0.01733	-0.01451	0.00231	-0.00455	-0.0247	-0.00055	-0.02027	-0.00014	0.00421	-0.00601	-0.01897	-0.00444	-0.01214	-0.00365	-0.01718	-0.00225	0.0509179	1	Cd1-H40-C28-S2-N4-O10	0	0	equal_bothsteps	equal	0	This sg doesnt have any	This sg doesnt have any
905	XUQQOP_FSR	0.00039	-0.00034	0.00012	0.04127	0.01549	5e-05	-0.00044	0.00027	-0.00018	-0.01541	0.04128	-1e-05	0.04469	-0.0447	-2e-05	0	0	0.00242	0.0632626	-4	C8-Cd1-H16-K2-O24-Zr1	0	0	equal_bothsteps	equal	0	Success at all eik	Success at all eik
906	QUVGUK_FSR	-5e-05	4e-05	0	-0.07458	-0.00911	-1e-05	2e-05	0	0	0.00922	-0.07437	1e-05	0.01798	-0.01795	1e-05	0	0	-0.06723	0.0751554	-4	Cd1-Co2-H16-C12-N4-O16	0	0	equal_bothsteps	equal	0	Success at all eik	Success at all eik
907	DOHJOZ01_FSR	0.00051	0.00048	-0.00089	-5e-05	-0.03409	0.00339	0.00359	-0.00315	-0.00041	-0.03403	0	0	-0.21342	-0.21342	-0.03673	0	0	0	0.304049	3m	C30-Cd6-Cl12-H36-N12-O6-S6	0	0	equal_bothsteps	equal	0	Success at all eik	Success at all eik
908	AXAWED_FSR	0.00132	0.00042	0.00011	-0.02066	0.00018	-0.03252	-0.05074	0.18117	0.08691	0	-0.05619	0	-0.00082	4e-05	0.00062	0.13979	-0.00015	-0.01397	0.214728	2	C34-Cd1-Cl2-H30-N6-O4	0	0	equal_bothsteps	equal	0	Success at all eik	This sg doesnt have any
909	NELMID_FSR	-2e-05	5e-05	2e-05	-0.00595	0	0	1e-05	2e-05	0	0	0.04324	0	-1e-05	-5e-05	-1e-05	0	0	-0.02906	0.04324	222	Cd8-H36-C44-N12-O32	0	0	equal_bothsteps	equal	0	Success at all eik	This sg doesnt have any
910	ATIDOY_FSR	0	0	0	-0.08055	0	0	3e-05	-3e-05	2e-05	0	-0.04236	0	0	0	0	0	0	-0.01342	0.08055	222	C44-Cd1-H32-N8-O8-S2	0	0	equal_bothsteps	equal	0	Success at all eik	This sg doesnt have any
911	LUGLOO_FSR	-0.03542	0.03297	-0.00061	-0.00201	0	0	3e-05	-1e-05	2e-05	-6e-05	0.00182	0.03396	1e-05	1e-05	2e-05	0	0	0	0.0484356	32	Cd6-H24-C36-N48	0	0	equal_bothsteps	equal	0	Success at all eik	Failed at e26
912	SIVGIN05_FSR	-1e-05	-1e-05	0	-0.01247	-1e-05	-0.02543	0.01002	-0.02982	-0.00842	0	0.00983	0	1e-05	0	-1e-05	-0.01374	1e-05	-0.00423	0.034017	2	Cd6-H40-C20-Cl12-O10	0	0	equal_bothsteps	equal	0	Success at all eik	This sg doesnt have any
913	AVEROJ_FSR	1e-05	-1e-05	-1e-05	-0.01266	0	0	-9e-05	9e-05	-5e-05	0	0.01251	0	0	0	0	0	0	0	0.01266	622	Cd6-H12-C12-N18-Cl6	0	0	equal_bothsteps	equal	0	Success at all eik	Success at all eik
914	INEFIR_FSR	-1e-05	0	1e-05	-0.10467	0	0.02271	0.0397	0.15894	0.0491	0	-0.07378	0	-1e-05	0	1e-05	-0.04981	-1e-05	-0.0474	0.186259	2	C30-Cd1-H38-N4-O6	0	0	equal_bothsteps	equal	0	Success at all eik	This sg doesnt have any
915	EZABEN_FSR	0	0	0	0	-0.0778	0	0	2e-05	0	0.12705	0	0	-0.06463	0.17942	0.15647	0	0	0	0.246681	mm2	C24-Cd6-Cl6-H40-N22-O4	0	0	equal_bothsteps	equal	0	Success at all eik	This sg doesnt have any
916	WUVGOL_FSR	0.00218	0.24221	-0.06485	0	-0.09976	0	-0.00027	-0.00019	0	-0.41745	0.00021	-0.19271	0.13026	0.03391	0.08187	0	-0.11307	0	0.459785	m	Cd6-H16-C30-N12-O26	0	0	equal_bothsteps	equal	0	Success at all eik	This sg doesnt have any
917	LEQQUU_FSR	0	0	0	-0.00248	0	0	0	1e-05	0	0	-0.00701	0	7e-05	5e-05	5e-05	0	0	-0.01441	0.0144103	222	Cd6-H16-C20-Br12-N4	0	0	equal_bothsteps	equal	0	Success at all eik	This sg doesnt have any
918	EDAXAL_FSR	-1e-05	1e-05	0	-0.03385	0	0	0	1e-05	0	0	-0.08993	0	1e-05	0	0	0	0	-0.06128	0.08993	222	Cd8-P4-H64-C28-N4-Cl8-O28	0	0	equal_bothsteps	equal	0	Success at all eik	This sg doesnt have any
919	XUDMUG_FSR	0.00353	-0.0013	0.00217	0.01329	-0.00918	0.0086	-0.04732	-0.01285	-0.02858	0	0.05105	0	0.00032	0.00039	-4e-05	0.00197	0.00068	0.00496	0.076881	2	C12-Cd1-H8-I2-N4	0	0	equal_bothsteps	equal	0	Success at all eik	This sg doesnt have any
920	MITREN_FSR	0.00012	5e-05	0.00018	0.03827	4e-05	0.03531	0.01625	0.10356	0.03746	0	0.10289	0	-0.0001	-2e-05	-0.0001	-0.01747	3e-05	0.00384	0.151586	2	C18-Cd1-H32-N6-O8	0	0	equal_bothsteps	equal	0	Success at all eik	This sg doesnt have any
921	HAZPEF_FSR	4e-05	3e-05	-1e-05	0.06722	1e-05	0.10303	0.1371	0.09146	-0.07652	0	0.07647	0	1e-05	1e-05	5e-05	-0.01927	1e-05	0.13808	0.19714	2	Br2-C12-Cd1-H6-N2-O4	0	0	equal_bothsteps	equal	0	Success at all eik	This sg doesnt have any
922	IWAXUA_FSR	-0.08776	0.0155	0.0431	0.01416	0.00658	-0.00066	-0.01609	-0.00963	0.01043	0.00824	0.01524	-0.0064	0.01606	-0.00204	-0.01348	0.00241	0.04633	0.01107	0.103698	1	Cd1-H36-C36-Br2-N4-O5	0	0	equal_bothsteps	equal	0	This sg doesnt have any	This sg doesnt have any
923	HIXWIU01_FSR	-1e-05	-1e-05	0	-0.03967	0	0	0	0	0	0	-0.04804	0	0	0	0	0	0	0.11635	0.11635	222	Cd8-H40-C32-O52	0	0	equal_bothsteps	equal	0	Success at all eik	This sg doesnt have any
924	LALYOO_FSR	0	-0.00069	-3e-05	-0.00048	0.01529	-0.07456	-0.07394	0.07442	5e-05	0.01623	0	0	0.0038	0.0038	0.09261	0	0	0	0.106158	3m	C42-Cd6-Cl6-H36-N6-O12-S6	0	0	equal_bothsteps	equal	0	Success at all eik	Success at all eik
925	QUCTIS_FSR	-0.15343	-0.07582	-0.00227	0.01307	-0.06261	-0.10382	-0.09616	-0.01732	-0.02306	0.01162	0.00032	-0.00723	-0.04759	-0.06666	0.06599	-0.00036	0.00303	0.01753	0.232478	1	Cd1-H48-C30-N6-O9	0	0	equal_bothsteps	equal	0	This sg doesnt have any	This sg doesnt have any
926	BEVQID_FSR	0.00022	-0.00023	1e-05	0	0.07897	0	3e-05	-2e-05	-1e-05	-0.07894	0	0	-0.14817	0.14807	3e-05	0	0	0	0.209474	-42m	C8-Cd1-H8-O20-Sr1-Zr1	0	0	equal_bothsteps	equal	0	Success at all eik	Success at all eik
927	LAMPOG_FSR	-0.00031	9e-05	7e-05	0.09129	4e-05	0.03364	0.16954	0.08824	0.04018	0	-0.06983	0	-0.00026	0.00067	0.00054	-0.00993	-9e-05	-0.02064	0.207415	2	C16-Cd1-H16-O10-S1	0	0	equal_bothsteps	equal	0	Success at all eik	This sg doesnt have any
928	WITSIE_FSR	0.00014	5e-05	0.00018	-0.00441	0.00016	-0.09074	-0.01133	-0.07953	0.12985	0	0.02532	0	0.00019	9e-05	0.00027	0.08845	0.00025	-0.02596	0.154776	2	C18-Cd1-H12-N14	0	0	equal_bothsteps	equal	0	Success at all eik	This sg doesnt have any
929	JIRLAA_FSR	0.16477	0.06116	-0.07127	0	0.2028	0	-1e-05	0	0	0.08865	0	0.03783	-0.10371	-0.13972	-0.21018	0	-0.05076	0	0.313068	m	K4-Cd8-B4-H24-C32-O52	0	0	equal_bothsteps	equal	0	Success at all eik	This sg doesnt have any
930	HAMQIY_FSR	-0.00075	-0.00018	0.00024	-0.01104	-4e-05	0.06065	-0.10054	0.04543	-0.11722	0	-0.02499	0	0.00053	7e-05	-0.00019	-0.0002	9e-05	-0.01211	0.162903	2	C16-Cd1-H10-N10	0	0	equal_bothsteps	equal	0	Success at all eik	This sg doesnt have any
931	ODOXEK_FSR	-83.9941	116.874	-130.762	0	313.064	0	-18.7214	15.5347	0.08612	376.555	-5.66287	67.8641	0.17275	0.17275	-0.10072	0	0	0	383.729	3m	Cd6-H18-C54-O36	0	0	equal_bothsteps	equal	0	Failed	Success at all eik
932	UMORIY_FSR	0	-7e-05	-5e-05	0	0.17654	0	0	0	0	-0.09587	0	0	0.20621	-0.02874	0.06495	0	0	0	0.218099	mm2	C8-Cd4-H8-N16-O12	0	0	equal_bothsteps	equal	0	Success at all eik	This sg doesnt have any
933	NASCIV_FSR	-0.00232	0.00238	6e-05	0	0.03693	0	-1e-05	0	0	-0.03697	0	0	0.12475	-0.12477	-1e-05	0	0	0	0.17647	-42m	C28-Cd8-H20-N48-O8	0	0	equal_bothsteps	equal	0	Success at all eik	Success at all eik
934	CIJVOH_FSR	0	0	0	0.06951	0	-0.0002	-0.00058	-0.00062	-0.00147	0	0.01563	0	0	0	0	-0.00171	1e-05	0.00354	0.0695316	222	Cd8-H56-C16-S4-O60	0	0	equal_bothsteps	equal	0	Success at all eik	This sg doesnt have any
935	MOHMUT_FSR	0.0004	-0.00029	1e-05	0	-0.06409	0	1e-05	6e-05	1e-05	0.0641	0	0	-0.01236	0.01238	3e-05	0	0	0	0.0641	-42m	C40-Cd8-Cl8-H24-N16-O16	0	0	equal_bothsteps	equal	0	Success at all eik	Success at all eik
936	QEKBEO_FSR	1e-05	3e-05	-0.00015	0	-0.017	0	0	0	-2e-05	0.04284	0	0	0.04864	-0.00619	-0.08147	0	0	0	0.095087	mm2	C28-Cd6-H16-N20-O4-S12	0	0	equal_bothsteps	equal	0	Success at all eik	This sg doesnt have any
937	FITDEU_FSR	1e-05	1e-05	0	0.00108	0	-0.02253	-0.13195	0.05409	-0.09492	0	0.03108	0	0	-1e-05	-1e-05	-0.01968	0	0.03651	0.174104	2	Zn2-H38-C30-N10-O12	0	0	equal_bothsteps	equal	0	Success at all eik	This sg doesnt have any
938	JIZKIO_FSR	-0.10025	-0.07354	0.03673	0	-0.00725	0	2e-05	3e-05	2e-05	-0.02004	-5e-05	-0.01802	-0.14616	-0.03478	0.12631	0	0.07774	0	0.236882	m	C28-H28-N8-O8-Zn2	0	0	equal_bothsteps	equal	0	Success at all eik	This sg doesnt have any
939	NADWOG_FSR	-3e-05	-2e-05	-2e-05	0.02184	0	-0.06823	-0.14987	0.29963	-0.05849	0	0.02665	0	-3e-05	-2e-05	-2e-05	-0.03448	0	0.0094	0.341131	2	Zn2-P2-H26-C22-N4-O10	0	0	equal_bothsteps	equal	0	Success at all eik	This sg doesnt have any
940	NENLIB_FSR	0.00485	-0.00463	0.00046	-0.03453	0	0	-0.00063	0.00032	-0.00019	0.00115	0.03517	-0.00479	0	0	-7e-05	0	0	0	0.0359941	32	Zn3-Mo3-H24-C12-N6-O12-F12	0	0	equal_bothsteps	equal	0	Success at all eik	Success at all eik
941	UNAJIC_FSR	0.04376	-0.16806	-0.0263	0.04725	-0.01466	-0.00982	0.01698	-0.09908	-0.02297	0.06153	0.02535	-0.10218	-0.00647	0.06493	-0.00768	-0.01493	-0.02372	0.02388	0.236886	1	Zn2-H32-C36-N4-Cl4-O4	0	0	equal_bothsteps	equal	0	This sg doesnt have any	This sg doesnt have any
942	AWIBOZ_FSR	-0.00039	9e-05	0.00141	-0.03241	0.00023	0.02332	0.00053	-0.05127	0.0535	0	-0.01993	0	-0.00033	-9e-05	0.00224	0.18421	0.00044	-0.03323	0.190659	2	C32-Cl2-H26-O14-Zn2	0	0	equal_bothsteps	equal	0	Success at all eik	This sg doesnt have any
943	KOMMII_FSR	-0.00222	-0.07144	0.06204	0	-0.00259	0	5e-05	-2e-05	-1e-05	0.01052	0	-0.03013	-0.03196	-0.02176	0.18711	0	0.05041	0	0.209651	m	Zn2-H60-C32-O8	0	0	equal_bothsteps	equal	0	Success at all eik	This sg doesnt have any
944	EBOMIT_FSR	1e-05	0	0	0.02947	0	-0.04571	0.13265	-0.10238	-0.18639	0	0.00829	0	0	0	0	-0.15864	0	0.05053	0.250774	2	Zn2-H22-C22-N2-O10	0	0	equal_bothsteps	equal	0	Success at all eik	This sg doesnt have any
945	BIZSEJ_FSR	7e-05	9e-05	-3e-05	0.09039	-1e-05	-0.0402	0.0776	0.05669	0.11859	0	0.0698	0	-0.00022	-0.00018	-0.00013	0.05017	-3e-05	0.03464	0.167843	2	Zn2-H24-C12-S6-N4-O16	0	0	equal_bothsteps	equal	0	Success at all eik	This sg doesnt have any
946	FITDUK_FSR	0	0	0	0.0521	0	-0.044	-0.10652	0.10413	-0.02999	0	0.06812	0	0	-1e-05	-1e-05	-0.02461	0	0.07557	0.166521	2	Zn2-H34-C30-N10-O12	0	0	equal_bothsteps	equal	0	Success at all eik	This sg doesnt have any
947	OHUVUK_FSR	7e-05	-4e-05	-4e-05	0.01219	-2e-05	0.01131	0.02903	0.05897	0.01105	0	7e-05	0	4e-05	3e-05	5e-05	0.01629	-2e-05	0.00215	0.0666507	2	Zn2-H12-C12-N8	0	0	equal_bothsteps	equal	0	Success at all eik	This sg doesnt have any
948	XEZMIA_FSR	0.03428	-0.14984	-0.1124	0	0.01937	0	0.00017	1e-05	6e-05	-0.0827	0.00011	-0.08316	-0.15534	-0.09683	0.12798	0	-0.08178	0	0.242205	m	Zn2-H22-C30-N2-O12	0	0	equal_bothsteps	equal	0	Success at all eik	This sg doesnt have any
949	FITFIA_FSR	-0.00019	-0.00021	-0.00011	0.01283	1e-05	0.07668	0.14779	0.03346	0.01419	0	-0.01353	0	-5e-05	0	-2e-05	0.00481	-2e-05	0.0228	0.152794	2	Zn2-H26-C20-N10-O8	0	0	equal_bothsteps	equal	0	Success at all eik	This sg doesnt have any
950	OJALAO_FSR	-4e-05	1e-05	0	-0.09404	-1e-05	-0.01771	0.01702	-0.00498	-0.02771	0	0.01278	0	0	0	0	-0.14343	0	-0.0302	0.175038	2	C34-H34-N2-O8-Zn2	0	0	equal_bothsteps	equal	0	Success at all eik	This sg doesnt have any
951	TAPREK_FSR	1e-05	-1e-05	0.00017	0.00457	0	-0.05594	-0.0022	-0.08107	0.04689	0	-0.01487	0	-5e-05	0.00027	-8e-05	-0.02964	-4e-05	-0.06153	0.0948533	2	Zn2-H28-C28-O14	0	0	equal_bothsteps	equal	0	Success at all eik	This sg doesnt have any
952	MUJGII02_FSR	-8e-05	-9e-05	-4e-05	0.04465	0	0	0	1e-05	-1e-05	0	0.04468	0	-1e-05	-1e-05	-2e-05	0	0	0.04611	0.04611	-42m	Zn2-Cu4-H24-C24-N16	0	0	equal_bothsteps	equal	0	Success at all eik	Success at all eik
953	NEMJOF01_FSR	-6e-05	-3e-05	5e-05	0	-0.01059	0	0	0	1e-05	0.00035	0	0	-0.05132	0.10102	0.09558	0	0	0	0.148237	mm2	C22-Cl4-H20-N8-O2-Zn2	0	0	equal_bothsteps	equal	0	Success at all eik	This sg doesnt have any
954	HEBNAF_FSR	0.00249	-0.00686	0.07176	0	0.05341	0	2e-05	-0.00012	8e-05	-0.06331	7e-05	0.06297	0.13981	-0.08199	-0.03674	0	0.0165	0	0.167114	m	C36-H24-N12-O8-Zn2	0	0	equal_bothsteps	equal	0	Success at all eik	This sg doesnt have any
955	YAFZUB_FSR	0.11126	-0.06217	0.17296	0	0.02884	0	-1e-05	0	2e-05	-0.01391	1e-05	-0.05228	0.10139	0.01615	0.07864	0	0.15283	0	0.268388	m	C14-H24-O20-S2-Zn2	0	0	equal_bothsteps	equal	0	Success at all eik	This sg doesnt have any
956	WEXCIN_FSR	0	0	-2e-05	-0.08644	0	-0.01088	0.0358	-0.10818	0.00606	0	-0.01484	0	1e-05	1e-05	2e-05	-0.03869	-1e-05	-0.04738	0.115072	2	Zn2-H38-C30-S2-N6-O14	0	0	equal_bothsteps	equal	0	Success at all eik	This sg doesnt have any
957	ECIWAO_FSR	-0.11576	-0.02363	-0.08889	0	-0.06713	0	-0.00015	3e-05	0.00015	-0.00398	8e-05	0.01685	-0.14651	-0.00943	-0.2541	0	-0.08107	0	0.340001	m	C32-H24-N4-O8-Zn2	0	0	equal_bothsteps	equal	0	Success at all eik	This sg doesnt have any
958	HIQPII_FSR	0	0	0	0.01364	0	0	0	0	0	0	0.01364	0	2e-05	2e-05	2e-05	0	0	-0.03236	0.03236	-42m	Zn2-H24-C20-N8	0	0	equal_bothsteps	equal	0	Success at all eik	Success at all eik
959	GEDLOS_FSR	-0.03774	-0.10737	-0.00791	0	-0.00598	0	-8e-05	5e-05	-5e-05	-0.02136	-6e-05	-0.01444	0.13676	0.00286	0.02503	0	0.05795	0	0.159942	m	C40-H32-N12-O8-Zn2	0	0	equal_bothsteps	equal	0	Success at all eik	This sg doesnt have any
960	DERYAB_FSR	0.00025	7e-05	-6e-05	0.05147	-1e-05	-0.00552	-0.01479	-0.2267	-0.06186	0	0.0025	0	-5e-05	-3e-05	0	-0.02889	0	0.04534	0.235467	2	C18-H30-Ni2-O24-Zn1	4	4	equal_bothsteps	equal	4	Success at all eik	This sg doesnt have any
961	PODREH_FSR	0.00045	0.00013	0.00024	-0.02609	-0.0004	0.0619	0.08562	0.06545	0.10675	0	0.02511	0	0.00034	0.00021	0.00036	-0.00825	-0.0004	0.02053	0.153756	2	C20-H16-N20-S8-Zn2	0	0	equal_bothsteps	equal	0	Success at all eik	This sg doesnt have any
962	RATDAS01_FSR	0.00016	9e-05	9e-05	0.14619	0.0001	0.03241	0.06974	-0.16643	0.22525	0	0.04355	0	0.00037	0.00021	0.00017	0.15637	0.00016	0.04161	0.291885	2	Zn12-H24-C24-O48	0	0	equal_bothsteps	equal	0	Success at all eik	This sg doesnt have any
963	ROCZEP_FSR	0.02712	0.07341	-0.02336	0	-0.08231	0	0	0	1e-05	0.0899	0	0.05479	-0.03479	0.13842	-0.05751	0	-0.01926	0	0.178886	m	C36-H36-N8-O10-Zn2	0	0	equal_bothsteps	equal	0	Success at all eik	This sg doesnt have any
964	JOYZEE_FSR	1e-05	0	0	0.03696	0	-0.15463	-0.27684	-0.20069	-0.08799	0	0.10407	0	0	0	0	0.05478	0	0.07511	0.368089	2	Zn2-H16-C12-N4-O10	0	0	equal_bothsteps	equal	0	Success at all eik	This sg doesnt have any
965	AQOROP_FSR	0.19556	-0.22697	-0.03166	0	-0.04504	0	-0.00011	-0.00056	0.00012	0.07356	0.0001	-0.15167	-0.05567	-0.075	0.08624	0	-0.02837	0	0.305088	m	Zn2-H12-C24-N8-O4	0	0	equal_bothsteps	equal	0	Success at all eik	This sg doesnt have any
966	QENFAR_FSR	0.00014	0.00013	0.00018	0.07397	-3e-05	0.00727	0.04746	-0.29508	-0.06307	0	0.06212	0	0.00016	0.00018	0.00026	-0.05577	-1e-05	0.02015	0.311707	2	Zn2-H36-C28-N4-O16	0	0	equal_bothsteps	equal	0	Success at all eik	This sg doesnt have any
967	RIBNUO_FSR	2e-05	3e-05	1e-05	0.07634	0	0.00508	0.00152	0.07081	-0.03326	0	-0.00449	0	-5e-05	-5e-05	-1e-05	-0.1388	-1e-05	0.02429	0.159536	2	C34-H38-N6-O8-Zn2	0	0	equal_bothsteps	equal	0	Success at all eik	This sg doesnt have any
968	MOFTIL01_FSR	-0.24711	0.28035	0.03428	0	0.03799	0	0	1e-05	0	-0.06331	0	0.17387	0.05665	0.07567	-0.0826	0	0.03161	0	0.377526	m	Zn2-H8-C16-N8-O4	0	0	equal_bothsteps	equal	0	Success at all eik	This sg doesnt have any
969	UNABAN_FSR	4e-05	0	6e-05	-0.04792	0	0.05799	0.04734	-0.19273	0.05241	0	-0.03985	0	-1e-05	0	-2e-05	-0.08263	1e-05	0.02522	0.209095	2	Zn2-H24-C16-S4-N4-O8	0	0	equal_bothsteps	equal	0	Success at all eik	This sg doesnt have any
970	XOLZUT_FSR	0.00158	0.00116	0.00211	-0.00022	-0.00056	-0.00101	0.00145	0.00128	0.00092	-0.00034	-0.00021	-0.00087	0.00095	0.00112	0.00195	0.0001	-3e-05	0.00023	0.00440837	1	Zn2-H30-C38-N2-O8	0	0	equal_bothsteps	equal	0	This sg doesnt have any	This sg doesnt have any
971	FITDAQ_FSR	0.00011	4e-05	3e-05	0.00328	-4e-05	0.04719	0.11673	-0.07964	0.04051	0	-0.00024	0	0.0002	0.00011	0.00012	0.00078	3e-05	-0.01106	0.147002	2	Zn2-H26-C20-N10-O8	0	0	equal_bothsteps	equal	0	Success at all eik	This sg doesnt have any
972	ASAYOJ_FSR	-1e-05	-1e-05	-3e-05	0.03708	1e-05	-0.07415	-0.23338	-0.25872	0.06921	0	0.04244	0	2e-05	-3e-05	1e-05	0.00651	-1e-05	-0.00412	0.357762	2	C38-H30-N8-O8-Zn2	0	0	equal_bothsteps	equal	0	Success at all eik	This sg doesnt have any
973	CAVVAY_FSR	-5e-05	2e-05	-2e-05	0.04142	0	0.12346	0.08207	-0.10129	0.09434	0	0.01715	0	1e-05	-6e-05	4e-05	0.03707	-3e-05	-0.01421	0.161831	2	Zn2-P2-H30-C34-N4-O12	0	0	equal_bothsteps	equal	0	Success at all eik	This sg doesnt have any
974	LUPCIK_FSR	0.00019	-4e-05	7e-05	0	0.15923	0	0.00021	-8e-05	0.0001	0.02454	0	0	0.22414	-0.02063	0.15977	0	0	0	0.276027	mm2	C24-F4-H12-N4-O8-Zn2	0	0	equal_bothsteps	equal	0	Success at all eik	This sg doesnt have any
975	BOQWEK_FSR	-0.00784	-0.0651	0.01909	0	-0.00659	0	7e-05	4e-05	-7e-05	-0.09394	0.00017	-0.12666	-0.11144	0.13521	0.14384	0	0.15387	0	0.274969	m	C24-H20-N8-O8-Zn2	0	0	equal_bothsteps	equal	0	Success at all eik	This sg doesnt have any
976	NISWUI_FSR	0.21354	-0.01521	-0.00637	0	-0.05869	0	-0.00014	7e-05	1e-05	0.0255	4e-05	0.013	-0.09486	-0.06842	0.01406	0	-0.0124	0	0.23936	m	Zn2-H28-C32-Cl4-O14	0	0	equal_bothsteps	equal	0	Success at all eik	This sg doesnt have any
977	RIFQUU_FSR	0	1e-05	1e-05	0.03511	0	0.01201	0.07868	-0.14627	0.02869	0	-0.0032	0	-2e-05	-2e-05	0	-0.03287	0	0.0306	0.168579	2	Zn2-H20-C12-S2-N4-O14	0	0	equal_bothsteps	equal	0	Success at all eik	This sg doesnt have any
978	KEYPAG_FSR	-0.03987	0.05951	0.08724	0	-0.00281	0	2e-05	-3e-05	-5e-05	-0.04438	7e-05	0.08275	-0.0355	-0.05426	0.13762	0	0.04752	0	0.17595	m	C36-H28-N4-O10-Zn2	0	0	equal_bothsteps	equal	0	Success at all eik	This sg doesnt have any
979	BUSHUU_FSR	5e-05	-3e-05	-4e-05	0.13596	0	0.08462	0.11015	-0.04356	-0.04413	0	0.11031	0	9e-05	-0.00018	-0.00058	-0.0957	5e-05	0.13156	0.167788	2	Zn2-H22-C20-N2-O14	0	0	equal_bothsteps	equal	0	Success at all eik	This sg doesnt have any
980	CUSVUI_FSR	0.11315	0.02604	0.01463	0	0.03948	0	1e-05	-1e-05	0	-0.01491	0	0.03306	-0.08784	-0.04655	-0.22199	0	-0.02635	0	0.254322	m	Zn2-H16-C26-S2-N6-Cl2-O6	0	0	equal_bothsteps	equal	0	Success at all eik	This sg doesnt have any
981	QARBUI_FSR	1e-05	0	0	-0.04347	-1e-05	-0.0574	-0.08608	-0.12614	0.017	0	-0.0326	0	-1e-05	0	-1e-05	-0.02739	1e-05	-0.06177	0.157076	2	Zn2-H24-C34-N24-O2	0	0	equal_bothsteps	equal	0	Success at all eik	This sg doesnt have any
982	FIPWOS_FSR	-5e-05	-0.0001	-4e-05	0.01134	-4e-05	0.02538	0.07651	-0.02754	0.07686	0	0.08365	0	-3e-05	-9e-05	-4e-05	0.04288	2e-05	0.06912	0.139703	2	Zn2-H24-C18-N8-O6	0	0	equal_bothsteps	equal	0	Success at all eik	This sg doesnt have any
983	RIWSOG_FSR	0.00657	-0.0169	-0.08323	0.01373	0.01314	-0.00454	-0.02313	0.00738	0.08724	0.03482	-0.05589	-0.07423	0.0352	-0.03165	-0.00844	0.02499	-0.05342	-0.00928	0.148879	1	Zn2-H30-C22-N2-O16	0	0	equal_bothsteps	equal	0	This sg doesnt have any	This sg doesnt have any
984	QEYWIB_FSR	1e-05	0	0	-0.00178	0	0.0107	0.00438	0.00126	0.0032	0	-0.00066	0	0	0	-1e-05	-0.00083	0	0.0047	0.0118505	2	Zn2-H28-C24-N24-O12	0	0	equal_bothsteps	equal	0	Success at all eik	This sg doesnt have any
985	QOXFOY_FSR	-0.14934	0.11231	-0.00031	0.04786	0.05274	-0.1321	-0.13702	-0.09118	0.01383	-0.03331	0.06171	0.12558	0.04073	-0.0213	-0.02409	0.00804	0.01448	0.03833	0.24884	1	Zn2-P4-H24-C18-O8	0	0	equal_bothsteps	equal	0	This sg doesnt have any	This sg doesnt have any
986	LUKHEE01_FSR	-0.04818	0.05493	0.02981	0	-0.00409	0	9e-05	8e-05	3e-05	-0.07362	0	-0.00335	-0.01141	-0.00124	-0.00382	0	0.01116	0	0.0791284	m	Zn2-H24-C28-N8-O8	0	0	equal_bothsteps	equal	0	Success at all eik	This sg doesnt have any
987	SEJNEB_FSR	-0.07352	0.02898	-0.0437	-0.0137	-0.01518	-0.00311	-0.0119	0.07666	0.08825	-0.08608	-0.0062	-0.02836	0.00803	-0.05247	0.06801	-0.00025	0.01627	-0.00239	0.149331	1	Zn2-H44-C38-N4-Cl4-O8	0	0	equal_bothsteps	equal	0	This sg doesnt have any	This sg doesnt have any
988	LOZXIJ_FSR	-4e-05	2e-05	0.00015	-0.02461	2e-05	0.10204	0.17196	0.27684	-0.18739	0	-0.02815	0	0.00012	-9e-05	-0.0001	-0.15689	-0.00012	-0.04712	0.376986	2	Zn2-H20-C24-O10	0	0	equal_bothsteps	equal	0	Success at all eik	This sg doesnt have any
989	IYUCOV_FSR	-1e-05	0	0	0	0.14873	0	0	0	1e-05	-0.0503	0	0	-0.09832	0.03079	-0.09307	0	0	0	0.14873	mm2	Zn2-H40-C22-I4-N4-O18	0	0	equal_bothsteps	equal	0	Success at all eik	This sg doesnt have any
990	ECIHIK_FSR	7e-05	0.00014	-7e-05	0.09936	0	0	0	0	1e-05	0	0.1418	0	0	0	0	0	0	0.16927	0.16927	222	Zn2-H24-C16-N20-O8	0	0	equal_bothsteps	equal	0	Success at all eik	This sg doesnt have any
991	SANBOZ_FSR	0	2e-05	-1e-05	0	-0.05546	0	-8e-05	1e-05	2e-05	-0.09422	0	0	-0.07553	0.15521	-0.00348	0	0	0	0.172647	mm2	C12-H20-N4-O10-Zn2	0	0	equal_bothsteps	equal	0	Success at all eik	This sg doesnt have any
992	FITCUJ_FSR	3e-05	0.00012	-4e-05	0.0398	1e-05	-0.02728	-0.08542	0.0797	-0.07005	0	0.03452	0	3e-05	0	3e-05	-0.01762	0	0.01181	0.140525	2	Zn2-H26-C20-N10-O8	0	0	equal_bothsteps	equal	0	Success at all eik	This sg doesnt have any
993	XILPUE_FSR	0.21108	-0.04127	-0.10805	0	-0.05334	0	2e-05	-1e-05	7e-05	0.14334	3e-05	-0.10254	-0.13279	0.20989	0.2322	0	0.03445	0	0.397862	m	Zn2-H16-C12-N4-Cl4-O4	0	0	equal_bothsteps	equal	0	Success at all eik	This sg doesnt have any
994	UBOBES01_FSR	3e-05	1e-05	0	0	-0.01286	0	1e-05	-1e-05	0	0.01254	0	0	-0.03463	0.03461	-1e-05	0	0	0	0.0489601	-42m	Zn2-H12-C20-N4-Cl12	0	0	equal_bothsteps	equal	0	Success at all eik	Success at all eik
995	SAZVAR_FSR	2e-05	1e-05	0	-0.08523	0	0.04796	0.16055	0.0515	-0.01532	0	-0.02885	0	-1e-05	-1e-05	0	-0.05267	0	-0.06644	0.171743	2	Zn2-H40-C32-N8-O8	0	0	equal_bothsteps	equal	0	Success at all eik	This sg doesnt have any
996	UBOBIW01_FSR	7e-05	-2e-05	1e-05	0	0.01922	0	2e-05	-4e-05	0	-0.01918	0	0	-0.00804	0.0079	-3e-05	0	0	0	0.0192202	-42m	Zn2-H12-C20-Br8-N4-Cl4	0	0	equal_bothsteps	equal	0	Success at all eik	Success at all eik
997	EKEKEL_FSR	-3e-05	-2e-05	-8e-05	0	0.15802	0	2e-05	1e-05	1e-05	-0.1779	0	0	-0.01521	-0.28852	0.01621	0	0	0	0.289375	mm2	Zn12-P8-H32-C56-O40	0	0	equal_bothsteps	equal	0	Success at all eik	This sg doesnt have any
998	JARFEO_FSR	0	0	-1e-05	0.01167	-1e-05	-0.00589	-0.04459	-0.07501	-0.04205	0	0.0435	0	-1e-05	-1e-05	-1e-05	0.03315	0	0.09335	0.106185	2	Zn2-H28-C28-N8-Cl4	0	0	equal_bothsteps	equal	0	Success at all eik	This sg doesnt have any
999	POFJOK_FSR	-5e-05	-2e-05	-1e-05	-0.01825	-4e-05	0.15993	0.33135	0.14829	-0.03898	0	0.09685	0	-0.00023	-0.00012	-7e-05	-0.1151	-9e-05	0.0243	0.377733	2	C16-H12-I2-O12-Zn2	0	0	equal_bothsteps	equal	0	Success at all eik	This sg doesnt have any
1000	RABNEP_FSR	0.01119	0.04869	0.0015	0	0.03256	0	3e-05	-0.0001	0.0001	0.0161	6e-05	0.04238	-0.03684	-0.00369	-0.11488	0	-0.02289	0	0.123638	m	C28-H20-N12-O8-Zn2	0	0	equal_bothsteps	equal	0	Success at all eik	This sg doesnt have any
1001	OXUNUR_FSR	-2e-05	2e-05	-4e-05	0	0.02414	0	0	0.00019	3e-05	-0.17471	0	0	-0.01071	-0.10711	-0.03231	0	0	0	0.17471	mm2	C32-H24-N4-O16-Zn2	0	0	equal_bothsteps	equal	0	Success at all eik	This sg doesnt have any
1002	EBAVAG_FSR	0	0	0	-0.04558	0	0	0	2e-05	-1e-05	0	-0.02596	0	-7e-05	-0.00038	-3e-05	0	0	-0.04416	0.04558	222	Zn2-H26-C38-S4-N14-O4	0	0	equal_bothsteps	equal	0	Success at all eik	This sg doesnt have any
1003	SEYVIC01_FSR	0.12887	-0.13242	-0.02618	0	0.12437	0	-6e-05	2e-05	-6e-05	1e-05	0	-0.07909	0.06785	-0.03578	-0.02357	0	0.01296	0	0.235284	m	C20-H20-N8-O8-Zn2	0	0	equal_bothsteps	equal	0	Success at all eik	This sg doesnt have any
1004	EKOFIU01_FSR	0.0408	0.04731	0.08815	0.01513	-0.03386	-0.00064	0.01719	-0.07641	-0.00311	-0.04116	0.02762	0.04428	0.02537	0.00655	0.06423	-0.02097	-0.01492	0.01147	0.138341	1	Zn2-H34-C26-S2-N6-O14	0	0	equal_bothsteps	equal	0	This sg doesnt have any	This sg doesnt have any
1005	ODIVON01_FSR	0	0	-1e-05	0.13597	0	0	-1e-05	-1e-05	0	0	0.10882	0	-0.00021	-0.00017	2e-05	0	0	0.06568	0.13597	222	Zn2-H32-C40-N12-O8	0	0	equal_bothsteps	equal	0	Success at all eik	This sg doesnt have any
1006	LOSGIL_FSR	-0.11021	0.07945	-0.19091	-0.0006	0.01594	-0.00047	-0.01377	-0.01201	-0.01339	-0.05022	0.00137	-0.03429	0.071	-0.01733	-0.04753	-0.00127	-0.12214	7e-05	0.235564	m	C14-Cl2-H12-N10-Zn2	0	0	equal_bothsteps	equal	0	Success at all eik	This sg doesnt have any
1007	TAKRIJ_FSR	-2e-05	1e-05	2e-05	0.08646	1e-05	0.03641	0.03407	-0.04474	-0.17755	0	0.04596	0	0	1e-05	1e-05	-0.06472	1e-05	-0.0559	0.19183	2	Zn2-H36-C20-N8-O12	0	0	equal_bothsteps	equal	0	Success at all eik	This sg doesnt have any
1008	CIHROB_FSR	1e-05	-1e-05	1e-05	0.04749	1e-05	-0.05105	-0.04673	-0.01123	0.28422	0	0.09657	0	1e-05	1e-05	2e-05	-0.02388	0	0.06953	0.304001	2	Zn2-H26-C22-N10-O8	0	0	equal_bothsteps	equal	0	Success at all eik	This sg doesnt have any
1009	HEMRUP_FSR	2e-05	-0.00025	4e-05	0.04061	8e-05	0.0593	0.04045	-0.07154	0.04155	0	0.042	0	-2e-05	-0.00042	-2e-05	0.01703	0.00014	0.05228	0.101219	2	C40-Cl4-H34-N6-O8-S2-Zn2	0	0	equal_bothsteps	equal	0	Success at all eik	This sg doesnt have any
1010	PANREC_FSR	5e-05	-2e-05	-0.00012	-0.02646	-8e-05	-0.01121	0.03677	-0.05244	-0.10332	0	-0.00685	0	0	0	1e-05	-0.05696	-1e-05	-0.02559	0.121754	2	Zn2-H18-C28-N2-O6	0	0	equal_bothsteps	equal	0	Success at all eik	This sg doesnt have any
1011	GIFYOL_FSR	2e-05	-4e-05	-2e-05	0.00357	1e-05	-0.08045	-0.06338	-0.00858	-0.03952	0	-0.02341	0	2e-05	9e-05	7e-05	-0.14901	-8e-05	0.05315	0.161868	2	Zn2-H40-C22-N8-Cl4-O4	0	0	equal_bothsteps	equal	0	Success at all eik	This sg doesnt have any
1012	JEGCAC_FSR	0.01072	0.00545	0.0108	0	0.0137	0	7e-05	6e-05	9e-05	-1e-05	0.0001	0.00311	-0.02856	-0.00541	-0.02379	0	-0.03064	0	0.0528007	m	C40-H32-N4-O8-Zn2	0	0	equal_bothsteps	equal	0	Success at all eik	This sg doesnt have any
1013	UGENAX_FSR	0.0281	0.02902	0.04429	0	0.04198	0	1e-05	3e-05	4e-05	0.01	1e-05	-0.11752	0.02849	-0.10161	0.02528	0	-0.00236	0	0.117945	m	Zn2-H24-C32-N20-O8	0	0	equal_bothsteps	equal	0	Success at all eik	This sg doesnt have any
1014	YIWDEO_FSR	0	0	0	0.01946	0	-0.06836	-0.00954	-0.05175	0.11956	0	-0.01751	0	1e-05	0	1e-05	0.04123	0	-0.12787	0.151979	2	Zn2-H28-C28-N4-O10	0	0	equal_bothsteps	equal	0	Success at all eik	This sg doesnt have any
1015	NOKDIA_FSR	1e-05	-3e-05	-1e-05	0.04231	2e-05	-0.08611	-0.0851	0.02528	-0.14667	0	-0.01904	0	2e-05	-1e-05	-3e-05	-0.06531	1e-05	-0.01043	0.172498	2	Zn2-H28-C28-N8-O8	0	0	equal_bothsteps	equal	0	Success at all eik	This sg doesnt have any
1016	NUFPAG_FSR	0.0001	6e-05	0.00018	-0.01563	1e-05	0.02729	0.08494	-0.05281	-0.00766	0	-0.00913	0	2e-05	2e-05	-6e-05	0.03863	0	-0.05118	0.100726	2	Zn2-H44-C36-N4-O14	0	0	equal_bothsteps	equal	0	Success at all eik	This sg doesnt have any
1017	GIYKAB_FSR	-0.02464	-0.02274	0.04488	0	0.00878	0	0.0012	0.00128	-2e-05	-0.02361	0.00018	0.0149	-0.27253	-0.0879	-0.02027	0	-0.06322	0	0.295019	m	C24-H28-O8-Zn2	0	0	equal_bothsteps	equal	0	Success at all eik	This sg doesnt have any
1018	EJINOB_FSR	1e-05	1e-05	6e-05	0.03845	-2e-05	0.05836	0.08278	-0.08247	0.01064	0	0.03126	0	0	0	4e-05	0.03087	1e-05	0.01715	0.121426	2	Zn2-H26-C40-N8-Cl2-O6	0	0	equal_bothsteps	equal	0	Success at all eik	This sg doesnt have any
1019	DAVKAO_FSR	0	0	-1e-05	0	-0.03967	0	0	-4e-05	-4e-05	0.0884	0	0	-0.05407	0.00048	0.3133	0	0	0	0.317932	mm2	C28-H28-N8-O8-S2-Zn2	0	0	equal_bothsteps	equal	0	Success at all eik	This sg doesnt have any
1020	TAPQUZ_FSR	6e-05	0.00013	6e-05	-0.02738	2e-05	-0.09073	-0.06463	-0.20334	-0.01054	0	-0.03635	0	-7e-05	0.00011	2e-05	0.0327	-0.00012	-0.08448	0.216695	2	Zn2-H28-C32-O12	0	0	equal_bothsteps	equal	0	Success at all eik	This sg doesnt have any
1021	OKODAV_FSR	3e-05	1e-05	0	-0.04522	3e-05	-0.01298	0.00202	-0.01377	0.01204	0	0.02301	0	-1e-05	0	3e-05	0.01197	-3e-05	-0.02965	0.0472603	2	Zn2-H32-C20-N20	0	0	equal_bothsteps	equal	0	Success at all eik	This sg doesnt have any
1022	BIZSEJ01_FSR	5e-05	3e-05	-1e-05	-0.06332	-1e-05	0.02076	-0.04741	-0.0553	-0.03025	0	0.02482	0	-6e-05	-0.00015	-8e-05	-0.04117	-0.00011	0.00875	0.0826857	2	Zn2-H24-C12-S6-N4-O16	0	0	equal_bothsteps	equal	0	Success at all eik	This sg doesnt have any
1023	MCYSZN_FSR	0	0	0	0.02378	0	-0.06254	0.07765	0.0099	-0.0506	0	0.00072	0	4e-05	-1e-05	1e-05	-0.03807	4e-05	-0.04859	0.0932117	2	Zn2-H32-C16-S4-N4-O8	0	0	equal_bothsteps	equal	0	Success at all eik	This sg doesnt have any
1024	FIXGAV_FSR	0.18413	-0.05725	-0.01261	0	-0.17787	0	-6e-05	-6e-05	-2e-05	0.01409	4e-05	-0.02627	-0.26308	0.02521	-0.10238	0	-0.11814	0	0.334628	m	Zn2-H22-C34-N6-O8	0	0	equal_bothsteps	equal	0	Success at all eik	This sg doesnt have any
1025	IMACZN01_FSR	-1e-05	-4e-05	-5e-05	-0.00833	0	0	2e-05	4e-05	3e-05	0	0.03042	0	-1e-05	2e-05	-1e-05	0	0	0.01088	0.03042	222	C16-H24-N4-O16-Zn2	0	0	equal_bothsteps	equal	0	Success at all eik	This sg doesnt have any
1026	FATROJ_FSR	0.02995	0.08886	0.04622	0	0.07057	0	1e-05	0	2e-05	-0.06942	-1e-05	0.06727	0.03273	-0.02699	-0.02102	0	0.02299	0	0.12631	m	C20-Cl2-H22-N8-O8-Zn2	0	0	equal_bothsteps	equal	0	Success at all eik	This sg doesnt have any
1027	JISKUU_FSR	1e-05	2e-05	-0.00013	0.10111	6e-05	0.03263	0.01012	-0.23677	0.02304	0	0.00453	0	0	-5e-05	5e-05	0.0322	0	0.04561	0.238147	2	Zn2-H24-C28-N12-O8	0	0	equal_bothsteps	equal	0	Success at all eik	This sg doesnt have any
1028	GICTOB01_FSR	-0.21149	0.099	-0.05048	0	0.03564	0	2e-05	0.00017	0	-0.01373	0	-0.04362	0.0927	-0.10761	-0.18516	0	-0.05901	0	0.284885	m	C12-H16-N4-O14-Zn2	0	0	equal_bothsteps	equal	0	Success at all eik	This sg doesnt have any
1029	FAYQUS_FSR	0.00701	0.00716	0.0054	0	-0.00888	0	3e-05	-1e-05	-7e-05	-0.00537	1e-05	0.0057	-0.02944	-0.00705	-0.00186	0	-0.00748	0	0.0320163	m	C28-H28-N4-O8-S4-Zn2	0	0	equal_bothsteps	equal	0	Success at all eik	This sg doesnt have any
1030	LASMUP_FSR	-0.21971	-0.06451	-0.05462	0	-0.21936	0	1e-05	0	0	0.04126	0	0.00214	-0.41334	-0.03281	-0.11269	0	0.11601	0	0.488177	m	C20-H14-N6-O10-Zn2	0	0	equal_bothsteps	equal	0	Success at all eik	This sg doesnt have any
1031	KEKXAB_FSR	-1e-05	0	1e-05	-0.05133	0	0.01826	0.01044	0.04781	0.03716	0	-0.00748	0	0	0	0	0.09185	0	0.05132	0.112063	2	Zn2-H38-C24-N4-Cl2-O6	0	0	equal_bothsteps	equal	0	Success at all eik	This sg doesnt have any
1032	GOGHAM_FSR	0	0	-1e-05	-0.01201	0	0.00037	0.00503	-0.12447	-0.22643	0	-0.00125	0	0	0	-1e-05	-0.13307	0	0.08147	0.258438	2	Zn2-H34-C32-S2-N2-O8	0	0	equal_bothsteps	equal	0	Success at all eik	This sg doesnt have any
1033	PABRIU_FSR	0.00031	0	0.00014	0	-0.23584	0	9e-05	9e-05	6e-05	0.02879	0	0	-0.38331	0.05918	-0.197	0	0	0	0.435015	mm2	C24-H16-N4-O8-Zn2	0	0	equal_bothsteps	equal	0	Success at all eik	This sg doesnt have any
1034	NATCER_FSR	-2e-05	-0.00034	1e-05	0.01097	2e-05	0.01023	-0.0091	-0.17983	0.141	0	-0.0052	0	9e-05	-0.0001	5e-05	0.01594	-8e-05	0.00512	0.228757	2	Zn2-H24-C32-N4-O10	0	0	equal_bothsteps	equal	0	Success at all eik	This sg doesnt have any
1035	UVAROZ_FSR	-0.49241	-0.38013	-0.7214	0	-0.06848	0	1e-05	1e-05	0	-0.04283	0	0.04575	-0.27828	-0.09492	-0.39796	0	0.0057	0	1.07077	m	C56-H40-N4-O8-Zn2	0	0	equal_bothsteps	equal	0	Success at all eik	This sg doesnt have any
1036	MUZQII_FSR	-0.00018	-2e-05	-0.00019	0.00893	-4e-05	-0.00238	-0.00921	0.00271	-0.06749	0	0.01142	0	7e-05	2e-05	3e-05	-0.00248	0	-0.0053	0.0691197	2	Zn2-H56-C48-N8-O8	0	0	equal_bothsteps	equal	0	Success at all eik	This sg doesnt have any
1037	HOYQAP_FSR	3e-05	1e-05	0	0	0.07287	0	2e-05	1e-05	0	0.07201	0	0	0.08347	0.11146	-0.3437	0	0	0	0.370837	mm2	Zn4-H20-C18-N8-O6	0	0	equal_bothsteps	equal	0	Success at all eik	This sg doesnt have any
1038	LUVBAH_FSR	-0.00015	-4e-05	-0.00025	0	-0.01014	0	-3e-05	1e-05	0	-0.0039	0	0	-0.12156	0.01646	-0.09158	0	0	0	0.153084	mm2	C24-H16-N8-O20-Zn4	0	0	equal_bothsteps	equal	0	Success at all eik	This sg doesnt have any
1039	LUGLUU_FSR	-0.12585	0.05547	-0.07146	0	0.10639	0	0	0	2e-05	-0.11257	-2e-05	0.10058	0.0817	-0.08693	0.07312	0	-0.03511	0	0.230679	m	Zn4-H16-C24-N20-Cl4	0	0	equal_bothsteps	equal	0	Success at all eik	This sg doesnt have any
1040	HUZGEP_FSR	-1e-05	0	0	0.14213	-1e-05	0.07018	0.00843	0.10585	-0.0906	0	-0.03896	0	-2e-05	0	3e-05	0.26314	0	0.01448	0.302721	2	C47-H34-N6-O9-Zn2	0	0	equal_bothsteps	equal	0	Success at all eik	This sg doesnt have any
1041	ETOFEZ_FSR	-2e-05	0.00017	-2e-05	0.11846	0	0	2e-05	0	2e-05	0	0.08597	0	-1e-05	-1e-05	0	0	0	0.06471	0.11846	222	Zn4-H24-C28-Br8-N16	0	0	equal_bothsteps	equal	0	Success at all eik	This sg doesnt have any
1042	CEGJOO_FSR	-0.00038	0.00043	0.00039	0	0.01989	0	0.00027	-0.00016	-0.00024	-0.06854	0	0	0.09746	-0.01215	0.34399	0	0	0	0.357736	mm2	C16-H16-N8-O12-Zn4	0	0	equal_bothsteps	equal	0	Success at all eik	This sg doesnt have any
1043	USUBUG_FSR	-0.20835	0.09416	0.04018	0	-0.04186	0	3e-05	8e-05	4e-05	-0.03161	0	0.15432	-0.02474	1e-05	0.05277	0	0.05416	0	0.236952	m	C4-H8-N20-Zn2	0	0	equal_bothsteps	equal	0	Success at all eik	This sg doesnt have any
1044	DUGFIW_FSR	-1e-05	0	-6e-05	0.07741	-2e-05	-0.02841	-0.04975	0.10741	0.07144	0	0.05693	0	-1e-05	0	0	0.04661	0	0.08573	0.149521	2	C44-H28-N6-O8-S2-Zn2	0	0	equal_bothsteps	equal	0	Success at all eik	This sg doesnt have any
1045	HUHGUN_FSR	-0.07765	0.0269	0.03799	0	0.13628	0	1e-05	3e-05	0	0.07942	1e-05	0.06189	0.13798	0.11066	0.07104	0	0.04203	0	0.195292	m	Zn4-H16-C16-N32	0	0	equal_bothsteps	equal	0	Success at all eik	This sg doesnt have any
1046	FIRGIW_FSR	-8e-05	9e-05	3e-05	0.05812	0	0	0	-3e-05	-1e-05	0	0.03735	0	3e-05	-3e-05	-2e-05	0	0	0.03109	0.0581201	222	Zn4-H24-C16-N4-Cl4-O16	0	0	equal_bothsteps	equal	0	Success at all eik	This sg doesnt have any
1047	CIZMIJ_FSR	0.03971	0.0347	0.01046	-0.02603	0.01748	-0.01597	-0.03892	-0.18624	-0.12905	0.09138	0.02085	-0.00414	-0.03573	-0.0547	-0.08389	0.00745	0.00979	-0.00188	0.270027	1	Zn2-H40-C60-N12-O14	0	0	equal_bothsteps	equal	0	This sg doesnt have any	This sg doesnt have any
1048	KOQZAT_FSR	-1e-05	0	0	-0.11583	0	0	-3e-05	2e-05	0	0	0.11583	0	0	0	0	0	0	0	0.11583	422	Zn4-B16-H40-C12-N8-O28	0	0	equal_bothsteps	equal	0	Success at all eik	Success at all eik
1049	NOQDEE_FSR	0.0772	-0.01642	0.00017	0	-0.0024	0	-1e-05	-1e-05	-2e-05	-0.04156	0	0.00454	0.04959	-0.03375	-0.01386	0	0.04346	0	0.101203	m	C50-H36-N12-O12-S2-Zn2	0	0	equal_bothsteps	equal	0	Success at all eik	This sg doesnt have any
1050	CIMFIP_FSR	-1e-05	0	-1e-05	0	-0.18101	0	-0.00016	2e-05	-0.00041	0.01482	0	0	0.0247	0.07535	0.22494	0	0	0	0.238508	mm2	Zn4-H12-C16-N12-O16	0	0	equal_bothsteps	equal	0	Success at all eik	This sg doesnt have any
1051	VIWHOA_FSR	0.05851	0.008	-0.02326	0.00748	-0.00977	-0.01803	-0.00043	0.00286	0.01046	0.0358	-0.00946	0.04884	-0.01202	0.02068	-0.0379	-0.00845	0.07594	-0.01598	0.0948462	1	Zn3-H26-C40-N2-O16	0	0	equal_bothsteps	equal	0	This sg doesnt have any	This sg doesnt have any
1052	FOCLOB_FSR	0	0	0	0.00071	0	0	-1e-05	1e-05	-1e-05	0	-0.00688	0	0	7e-05	1e-05	0	0	0.00759	0.00759033	222	C72-H52-N8-O16-Zn2	0	0	equal_bothsteps	equal	0	Success at all eik	This sg doesnt have any
1053	PIKNIJ_FSR	9e-05	-5e-05	-0.00021	0.06239	0	0	0	0	0	0	0.03345	0	0	0	1e-05	0	0	0.06243	0.06243	222	Zn4-H12-C20-Br4-N16	0	0	equal_bothsteps	equal	0	Success at all eik	This sg doesnt have any
1054	DEWHET_FSR	0	0	1e-05	0.03382	0	0	0	-2e-05	2e-05	0	0.04929	0	0	1e-05	0	0	0	0.02451	0.04929	222	Zn4-H40-C16-S4-N8-O12	0	0	equal_bothsteps	equal	0	Success at all eik	This sg doesnt have any
1055	KEYSEO_FSR	1e-05	2e-05	2e-05	0.00575	0	0	-3e-05	-1e-05	-2e-05	0	-0.00576	0	1e-05	1e-05	1e-05	0	0	0	0.00576012	422	Zn4-H48-C32-N24	0	0	equal_bothsteps	equal	0	Success at all eik	Success at all eik
1056	XOVXIQ_FSR	1e-05	0	1e-05	-0.00784	0	0.03703	-0.07074	0.07063	-0.03911	0	0.01483	0	-2e-05	0	-1e-05	-0.03821	1e-05	0.07626	0.108362	2	Zn2-H34-C42-N10-O10	0	0	equal_bothsteps	equal	0	Success at all eik	This sg doesnt have any
1057	CIMZII_FSR	-5e-05	-3e-05	-0.00019	-0.04596	0	0	-2e-05	4e-05	-4e-05	0	0.03512	0	1e-05	-7e-05	-0.00015	0	0	0.07642	0.0764202	222	Zn4-H24-C16-O24	0	0	equal_bothsteps	equal	0	Success at all eik	This sg doesnt have any
1058	EGEBIC_FSR	-1e-05	-3e-05	-9e-05	0.13384	0	0	0	0	1e-05	0	0.07357	0	0	0	0	0	0	0.12872	0.13384	222	Zn4-H20-C12-S4-N4-O8	0	0	equal_bothsteps	equal	0	Success at all eik	This sg doesnt have any
1059	FIQBOW_FSR	4e-05	-0.00019	-4e-05	0	0.10107	0	1e-05	-8e-05	-5e-05	0.06385	0	0	0.10695	-0.02002	0.04552	0	0	0	0.117946	mm2	Zn4-H32-C32-Cl8-O4	0	0	equal_bothsteps	equal	0	Success at all eik	This sg doesnt have any
1060	RUBDOI_FSR	-0.04763	0.03746	-0.05387	0	-0.01348	0	-1e-05	-1e-05	0	0.0574	-1e-05	0.08767	-0.03093	-0.02159	0.01073	0	-0.02743	0	0.104789	m	C44-H36-N8-O8-Zn2	0	0	equal_bothsteps	equal	0	Success at all eik	This sg doesnt have any
1061	EYUZUU01_FSR	-1e-05	3e-05	2e-05	0	0.02443	0	0.00012	0.00012	6e-05	-0.16036	0	0	0.05045	-0.12448	0.1342	0	0	0	0.189869	mm2	Zn4-H20-C16-N12-O8	0	0	equal_bothsteps	equal	0	Success at all eik	This sg doesnt have any
1062	RUSQIG_FSR	0.10016	0.0186	0.03991	0	0.06105	0	6e-05	0.00011	0.00011	-0.18008	1e-05	0.09461	0.09637	-0.32472	0.0863	0	0.00233	0	0.35024	m	C12-H24-N16-O16-Zn4	0	0	equal_bothsteps	equal	0	Success at all eik	This sg doesnt have any
1063	FELXIE_FSR	0	0	0	0.08097	0	0	1e-05	2e-05	0	0	0.04743	0	0	0	0	0	0	0.14301	0.14301	222	Zn4-H48-C28-S8-N16-O16	0	0	equal_bothsteps	equal	0	Success at all eik	This sg doesnt have any
1064	MASXUA_FSR	0	-1e-05	0	-0.06834	0	-0.03722	0.01444	0.25981	0.05471	0	-0.04147	0	0	0	0	0.01633	0	-0.02423	0.269115	2	Zn2-H44-C46-N8-O8	0	0	equal_bothsteps	equal	0	Success at all eik	This sg doesnt have any
1065	OCIBEK_FSR	-3e-05	0	-2e-05	-0.00072	0	0.03005	0.02703	0.064	-0.04693	0	-0.03024	0	1e-05	0	0	-0.00191	0	0.02905	0.0891263	2	Zn2-H24-C42-N24	0	0	equal_bothsteps	equal	0	Success at all eik	This sg doesnt have any
1066	QOGJIF_FSR	0	0	0	0	0.07471	0	4e-05	1e-05	-1e-05	0.04998	0	0	0.11802	0.09879	-0.04641	0	0	0	0.160755	mm2	Zn4-H24-C32-O20	0	0	equal_bothsteps	equal	0	Success at all eik	This sg doesnt have any
1067	TACSIB_FSR	6e-05	-1e-05	0	0	-0.19703	0	0	0	1e-05	0.00068	0	0	-0.23372	0.28083	0.00824	0	0	0	0.365456	mm2	Zn4-H28-C12-N4-Cl8-O8	0	0	equal_bothsteps	equal	0	Success at all eik	This sg doesnt have any
1068	FELXEA_FSR	0	1e-05	1e-05	-0.0158	0	0	0	0	0	0	0.03957	0	0	0	-1e-05	0	0	0.08794	0.08794	222	Zn4-H48-C24-S8-N16-O16	0	0	equal_bothsteps	equal	0	Success at all eik	This sg doesnt have any
1069	QOTZOP_FSR	0	0	-2e-05	0.06196	0	0	-6e-05	0	-2e-05	0	0.02194	0	0	0	0	0	0	0.04331	0.06196	222	Zn4-H40-C32-O16	0	0	equal_bothsteps	equal	0	Success at all eik	This sg doesnt have any
1070	VAHWOS01_FSR	0	0	0	-0.01305	0	0	0	0	0	0	-0.0345	0	0	0	1e-05	0	0	-0.00615	0.0345	222	Zn4-H16-C32-N32	0	0	equal_bothsteps	equal	0	Success at all eik	This sg doesnt have any
1071	WISZON_FSR	-0.00424	0.0043	0	0.0146	0.01932	-0.04895	-0.04893	0.04894	-7e-05	0.01952	-0.0144	0.00423	0.00105	0.00105	0.01522	0	0	0	0.0735889	3	Zn3-H33-C30-N3-O12	0	0	equal_bothsteps	equal	0	Success at all eik	Success at all eik
1072	QOGFIB_FSR	0	0	0	0	0.01116	0	-1e-05	-3e-05	0	0.0112	0	0	-0.03286	-0.04787	-0.109	0	0	0	0.1235	mm2	Br8-C8-H32-N8-Zn4	0	0	equal_bothsteps	equal	0	Success at all eik	This sg doesnt have any
1073	INEPIC_FSR	0.00017	3e-05	-0.00042	0.17209	0.00029	0.00444	-0.03424	-0.04529	-0.06111	0	0.10121	0	6e-05	-4e-05	-0.00047	-0.00798	0.00036	0.14855	0.172344	2	Zn4-H34-C30-N14-O18	0	0	equal_bothsteps	equal	0	Success at all eik	This sg doesnt have any
1074	CUMBAO_FSR	0	0	0	0	-0.13885	0	-9e-05	-6e-05	-3e-05	-0.08192	0	0	-0.01147	-0.06594	0.25629	0	0	0	0.264885	mm2	Zn4-H36-C16-N4-O24	0	0	equal_bothsteps	equal	0	Success at all eik	This sg doesnt have any
1075	MOYPIA_FSR	-0.08634	-0.03342	0.00424	0	-0.05349	0	-0.00059	-0.0002	0.00012	-0.02313	-0.00043	0.0164	-0.06075	0.00266	-0.00034	0	0.02353	0	0.1147	m	C62-H56-N4-O8-Zn2	0	0	equal_bothsteps	equal	0	Success at all eik	This sg doesnt have any
1076	FODRIA_FSR	-0.00025	-0.00011	-0.00022	-0.02493	-0.00031	-0.0526	-0.07154	0.00099	0.04466	0	-0.00055	0	-0.0004	-9e-05	-0.00056	0.02072	-0.00032	-0.00631	0.0843433	2	Zn4-H28-C24-N28-O4	0	0	equal_bothsteps	equal	0	Success at all eik	This sg doesnt have any
1077	JAHJEK_FSR	0.03748	-0.00252	-0.08925	0.02748	0.04243	0.00826	-0.00054	-0.01898	-0.00897	-0.0443	0.01755	-0.04578	0.05624	0.03844	0.0051	-0.03585	-0.02437	0.01036	0.109667	1	Zn2-H26-C42-N12	0	0	equal_bothsteps	equal	0	This sg doesnt have any	This sg doesnt have any
1078	LOVQUI_FSR	0	-1e-05	0	0.05552	0	-0.01304	-0.02669	-0.14571	0.0285	0	-0.01334	0	0	-1e-05	-1e-05	0.19359	0	0.025	0.202438	2	Zn2-H56-C40-S4-N20-O16	0	0	equal_bothsteps	equal	0	Success at all eik	This sg doesnt have any
1079	GUGWAI_FSR	7e-05	-0.00011	-8e-05	0.01332	7e-05	0.01143	-0.00824	-0.05064	0.01819	0	0.01103	0	-6e-05	-0.00072	-1e-05	0.00271	4e-05	-0.02183	0.0555462	2	Zn2-H56-C40-N4-O14	0	0	equal_bothsteps	equal	0	Success at all eik	This sg doesnt have any
1080	GUQNAI_FSR	4e-05	-6e-05	-4e-05	-0.14554	0	0	8e-05	-3e-05	0.0002	0	-0.14621	0	0.00015	-0.00017	0.00011	0	0	-0.10596	0.14621	222	Zn4-H16-C16-S16-N24	0	0	equal_bothsteps	equal	0	Success at all eik	This sg doesnt have any
1081	VEPCIF_FSR	0	-6e-05	-9e-05	-0.00699	0	0	-1e-05	-1e-05	-1e-05	0	0.03079	0	0	0	1e-05	0	0	0.03102	0.03102	222	Zn4-H28-C24-S4-N28-O8	0	0	equal_bothsteps	equal	0	Success at all eik	This sg doesnt have any
1082	IVITOY_FSR	-0.00525	0.01421	0.04916	0	0.01576	0	-5e-05	-0.00015	-0.00016	0.0061	-1e-05	-0.00069	0.00487	-0.0078	-0.04501	0	-0.01062	0	0.0713981	m	C48-H34-N6-O8-Zn2	0	0	equal_bothsteps	equal	0	Success at all eik	This sg doesnt have any
1083	PASGEX01_FSR	-0.04091	0.04057	-0.00024	-0.00101	0	0	0	-1e-05	1e-05	2e-05	0.00101	0.04074	0	0	0	0	0	0	0.0576249	32	Zn3-H30-C36-N6-O18	0	0	equal_bothsteps	equal	0	Success at all eik	Success at all eik
1084	KENJUK_FSR	0.04522	0.11399	0.05076	0	0.00481	0	1e-05	-2e-05	-1e-05	0.02022	-6e-05	0.02486	0.01235	0.04216	-0.06075	0	-0.01167	0	0.134317	m	C20-H8-N40-Zn4	0	0	equal_bothsteps	equal	0	Success at all eik	This sg doesnt have any
1085	DIQXOQ_FSR	2e-05	2e-05	0	-0.00732	0	0	0	-1e-05	-1e-05	0	5e-05	0	0	-1e-05	0	0	0	0.0103	0.0103	222	Zn4-H36-C36-N4-O20	0	0	equal_bothsteps	equal	0	Success at all eik	This sg doesnt have any
1086	DUTJUZ_FSR	-0.00027	0.00027	0	-0.00026	0.03347	0.05152	0.05163	-0.05164	0	0.03342	0	0	0.04267	0.04267	0.02013	0	0	0	0.0803103	3m	C30-H24-N14-O6-Zn3	0	0	equal_bothsteps	equal	0	Success at all eik	Success at all eik
1087	POYRUR_FSR	-4e-05	0	5e-05	0.01578	0	0	0	0	1e-05	0	0.0759	0	0	0	0	0	0	-0.01436	0.0759	222	Zn4-H32-C24-O32	0	0	equal_bothsteps	equal	0	Success at all eik	This sg doesnt have any
1088	SIYSAV_FSR	5e-05	8e-05	9e-05	0.03963	0	0	0	0	0	0	0.04347	0	0	0	1e-05	0	0	0.04699	0.04699	222	Zn4-H32-C28-N4-Cl4-O4	0	0	equal_bothsteps	equal	0	Success at all eik	This sg doesnt have any
1089	JOMWUF_FSR	-0.02172	0.08772	-0.02971	0	0.07342	0	0.00012	0.00015	0.0002	0.01045	0.00012	0.01105	0.05351	0.02549	0.0396	0	-0.01998	0	0.121272	m	C76-H52-N4-O8-Zn2	0	0	equal_bothsteps	equal	0	Success at all eik	This sg doesnt have any
1090	QIKXEN_FSR	0	0	-1e-05	0.07676	0	0	0	-1e-05	1e-05	0	0.0508	0	-1e-05	0	0	0	0	0.08574	0.08574	222	Zn4-H48-C28-S8-N16-O16	0	0	equal_bothsteps	equal	0	Success at all eik	This sg doesnt have any
1091	RUGFUW_FSR	0	1e-05	1e-05	-0.00699	0	-0.01901	0.00973	-0.01555	-0.06054	0	-0.00755	0	1e-05	1e-05	-1e-05	-0.0353	1e-05	-0.02	0.0637069	2	Zn2-H48-C72-N12-O16	0	0	equal_bothsteps	equal	0	Success at all eik	This sg doesnt have any
1092	HEDNOT_FSR	-2e-05	-1e-05	1e-05	0	0.00853	0	6e-05	-4e-05	-1e-05	-0.12046	0	0	-0.0473	-0.01322	-0.14938	0	0	0	0.157246	mm2	Zn4-H24-C14-O14	0	0	equal_bothsteps	equal	0	Success at all eik	This sg doesnt have any
1093	FIQGEU_FSR	0	-1e-05	-1e-05	0	0.00119	0	0.00424	-0.01186	-0.01816	-0.0194	0	0	0.07006	0.15437	0.12094	0	0	0	0.209021	mm2	C64-H44-N8-O8-Zn2	0	0	equal_bothsteps	equal	0	Success at all eik	This sg doesnt have any
1094	BOYSIT_FSR	0.08884	-0.01823	-0.10161	0	0.01839	0	1e-05	1e-05	1e-05	0.07278	0	1e-05	-0.03668	0.05937	-0.08653	0	-0.0955	0	0.152227	m	Zn2-H42-C62-N10-O14	0	0	equal_bothsteps	equal	0	Success at all eik	This sg doesnt have any
1095	BUBCOS_FSR	3e-05	3e-05	-3e-05	0.0522	0	0.01375	-0.0596	-0.06413	0.00281	0	0.0697	0	5e-05	-7e-05	1e-05	-0.00184	-4e-05	0.01696	0.111941	2	C24-H30-N4-O16-P4-Zn3	0	0	equal_bothsteps	equal	0	Success at all eik	This sg doesnt have any
1096	PEQVEP_FSR	0.00119	-0.00151	-0.00016	-0.01935	-0.02486	0.00239	0.00216	0.00215	-0.00048	0.02514	-0.0195	5e-05	-0.07113	0.07152	0	0	0	-0.07186	0.123886	-4	C24-H24-N16-S24-Zn4	0	0	equal_bothsteps	equal	0	Success at all eik	Success at all eik
1097	ROSKOB_FSR	0	-1e-05	-1e-05	0	0.06578	0	0	0	0	0.11267	0	0	0.12712	0.16621	-0.25506	0	0	0	0.32991	mm2	Zn4-H24-C36-N16-O8	0	0	equal_bothsteps	equal	0	Success at all eik	This sg doesnt have any
1098	SIVGIP_FSR	0.09107	-0.02749	-0.03928	0	0.01788	0	-2e-05	-1e-05	0	0.02014	-1e-05	-0.04741	-0.12288	0.07208	-0.07722	0	-0.03943	0	0.181962	m	C8-H12-N16-Zn2	0	0	equal_bothsteps	equal	0	Success at all eik	This sg doesnt have any
1099	EHETER_FSR	-1e-05	1e-05	0	-0.00763	0.00886	1e-05	2e-05	-2e-05	1e-05	0.00897	0.00759	0	-0.00405	-0.00405	0.00739	0	0	0	0.0117799	6	Zn3-H42-C30-N12	0	0	equal_bothsteps	equal	0	Success at all eik	Success at all eik
1100	EJIROG_FSR	3e-05	1e-05	1e-05	0	-0.13283	0	7e-05	4e-05	2e-05	-0.14824	0	0	-0.06325	-0.1242	0.41921	0	0	0	0.441773	mm2	C16-H24-N4-S4-Zn4	0	0	equal_bothsteps	equal	0	Success at all eik	This sg doesnt have any
1101	IVAZUA01_FSR	-1e-05	0	0	0	-0.02305	0	0.00011	0	-2e-05	0.00015	0	0	-0.00033	-0.08551	0.58453	0	0	0	0.590752	mm2	Zn4-H12-C28-N4-O16	0	0	equal_bothsteps	equal	0	Success at all eik	This sg doesnt have any
1102	TALQUV_FSR	-0.00026	8e-05	-0.00022	-0.09171	0	0	0	0	0	0	-0.04093	0	0	0	0	0	0	-0.03802	0.0917107	222	Zn4-H28-C32-Br8-N20	0	0	equal_bothsteps	equal	0	Success at all eik	This sg doesnt have any
1103	NOQHUY_FSR	-0.06358	-0.01116	-0.02605	0	-0.01507	0	5e-05	-9e-05	3e-05	0.01895	6e-05	-0.00707	-0.00902	0.01952	0.03664	0	0.01904	0	0.0729481	m	C44-H36-N8-O8-Zn2	0	0	equal_bothsteps	equal	0	Success at all eik	This sg doesnt have any
1104	PIPKUW_FSR	-1e-05	0	0	0	-0.03046	0	1e-05	0	0	0.00019	0	0	-0.02073	-0.01047	0.03691	0	0	0	0.0436085	mm2	Zn4-H32-C36-S4-N8	0	0	equal_bothsteps	equal	0	Success at all eik	This sg doesnt have any
1105	LOQFEE_FSR	9e-05	1e-05	1e-05	0	0.08201	0	1e-05	-1e-05	0	0.04984	0	0	0.10654	-0.03569	-0.34772	0	0	0	0.365423	mm2	Zn4-H28-C32-N4-O24	0	0	equal_bothsteps	equal	0	Success at all eik	This sg doesnt have any
1106	ASALIP_FSR	-1e-05	0	1e-05	-0.02309	0	0	-1e-05	0	0	0	-0.08248	0	0	0	0	0	0	0.02305	0.08248	222	Zn4-H36-C32-N12-O20	0	0	equal_bothsteps	equal	0	Success at all eik	This sg doesnt have any
1107	EHETER01_FSR	-0.0218	0.02179	-1e-05	-0.00274	0	0	-1e-05	2e-05	6e-05	3e-05	0.00275	0.02182	1e-05	1e-05	2e-05	0	0	0	0.0309443	32	Zn3-H42-C30-N12	0	0	equal_bothsteps	equal	0	Success at all eik	Success at all eik
1108	XIZJAS_FSR	2e-05	-0.00029	0	-0.0742	0	0	1e-05	-1e-05	1e-05	0	-0.02334	0	1e-05	-1e-05	0	0	0	-0.07075	0.0742006	222	Zn4-P4-H36-C32-N8-O12	0	0	equal_bothsteps	equal	0	Success at all eik	This sg doesnt have any
1109	OGOVUC_FSR	0.07099	0.02903	0.01197	0	0.02201	0	0.0002	0.0003	-7e-05	0.00849	0.00038	-0.00332	0.11217	0.03579	0.00799	0	0.01295	0	0.142907	m	C58-H40-N4-O8-Zn2	0	0	equal_bothsteps	equal	0	Success at all eik	This sg doesnt have any
1110	WISZUT01_FSR	-0.0012	0.00118	-0.00016	0.03696	0.01109	-0.01602	-0.01603	0.01599	-0.00016	0.01108	-0.03696	0.0012	0.01857	0.01857	0.03443	0	0	0	0.0447728	3	Zn3-H45-C36-N3-O12	0	0	equal_bothsteps	equal	0	Success at all eik	Success at all eik
1111	ALIMAL_FSR	0.05485	0.16627	0.13216	0	0.08643	0	-2e-05	-1e-05	0	-0.06152	0	0.16143	-0.00024	-0.09805	-0.12383	0	0.02326	0	0.273321	m	C46-H36-N4-O16-Zn2	0	0	equal_bothsteps	equal	0	Success at all eik	This sg doesnt have any
1112	QAMFUF02_FSR	0.21941	-0.21908	3e-05	-0.00079	0	0	-0.00047	0.0004	4e-05	-0.0009	-0.00066	-0.21989	0	0	0	0	0	0	0.310062	32	Zn3-H18-C42-N12-O36	0	0	equal_bothsteps	equal	0	Success at all eik	Success at all eik
1113	QOXFUE_FSR	-0.00013	6e-05	-9e-05	-0.06343	0	0	1e-05	1e-05	0	0	-0.05606	0	-1e-05	0	-1e-05	0	0	-0.04008	0.0634302	222	Zn4-P8-H40-C32-O16	0	0	equal_bothsteps	equal	0	Success at all eik	This sg doesnt have any
1114	MAVSOS_FSR	0	-1e-05	0	0	0.08343	0	0	0	0	-0.09843	0	0	0.14289	-0.06758	0.18597	0	0	0	0.244069	mm2	Zn4-H24-C32-S8-N16	0	0	equal_bothsteps	equal	0	Success at all eik	This sg doesnt have any
1115	RUVYIR_FSR	-2e-05	-1e-05	0	0	0.04594	0	-0.0004	-0.00017	1e-05	-0.16036	0	0	0.0778	-0.06015	0.0056	0	0	0	0.160361	mm2	C44-H32-N4-O12-Zn2	0	0	equal_bothsteps	equal	0	Success at all eik	This sg doesnt have any
1116	KIJSII_FSR	0.00014	3e-05	1e-05	-0.02811	5e-05	-0.05251	-0.03093	-0.01326	0.05202	0	0.03185	0	6e-05	4e-05	8e-05	0.05482	5e-05	-0.00242	0.0696644	2	Zn4-H56-C32-N8-Cl8-O8	0	0	equal_bothsteps	equal	0	Success at all eik	This sg doesnt have any
1117	CICJEE_FSR	-1e-05	-7e-05	1e-05	0	0.04921	0	-8e-05	-0.00144	-0.0007	0.0688	0	0	-0.01207	0.03766	0.2356	0	0	0	0.238898	mm2	C52-H48-N8-O24-S4-Zn2	0	0	equal_bothsteps	equal	0	Success at all eik	This sg doesnt have any
1118	KEKLIY_FSR	-4e-05	0.00011	2e-05	0.0562	0	0	1e-05	-1e-05	-1e-05	0	0.00795	0	0	0	0	0	0	-0.04483	0.0562001	222	Zn4-P4-H24-C12-N4-O24	0	0	equal_bothsteps	equal	0	Success at all eik	This sg doesnt have any
1119	XALXIS01_FSR	-0.00013	-0.00023	-0.00041	-0.2503	0	0	0	0	0	0	-0.17058	0	0	0	0	0	0	-0.07006	0.2503	222	Zn4-H16-C24-N16-O8	0	0	equal_bothsteps	equal	0	Success at all eik	This sg doesnt have any
1120	LIFNAR_FSR	0.09677	0.02559	0.01757	0	0.0051	0	9e-05	0.00018	8e-05	0.00255	-0.00012	0.06362	0.00398	-0.01318	-0.08462	0	-0.00847	0	0.10475	m	C46-H34-N6-O8-Zn2	0	0	equal_bothsteps	equal	0	Success at all eik	This sg doesnt have any
1121	EXOKOR01_FSR	-5e-05	0.00012	2e-05	0.0381	-3e-05	-0.01637	0.01788	0.32153	0.00174	0	0.01826	0	-4e-05	-4e-05	0	-0.02157	-2e-05	-0.01732	0.322549	2	C18-H30-O24-Zn3	0	0	equal_bothsteps	equal	0	Success at all eik	This sg doesnt have any
1122	GALSER_FSR	2e-05	-3e-05	2e-05	-0.04224	0	0	0	2e-05	1e-05	0	-0.05288	0	0	-2e-05	0	0	0	0.03539	0.05288	222	Zn4-H52-C32-S8-N8-Cl4-O16	0	0	equal_bothsteps	equal	0	Success at all eik	This sg doesnt have any
1123	ROSKIV_FSR	0	0	-1e-05	0	0.0772	0	0.0003	4e-05	0.00028	0.03043	0	0	0.17055	0.01856	-0.08165	0	0	0	0.189996	mm2	Zn4-H24-C36-N16-O8	0	0	equal_bothsteps	equal	0	Success at all eik	This sg doesnt have any
1124	DOTHUR_FSR	-1e-05	0	-2e-05	0.07852	-2e-05	0.01131	0.01115	-0.01097	1e-05	0	-0.07826	0	3e-05	3e-05	6e-05	0	0	0	0.079808	32	Zn3-H54-C54-N12-O12	0	0	equal_bothsteps	equal	0	Success at all eik	Success at all eik
1125	FEBMUV01_FSR	-1e-05	0	0	0.05987	0	0	0	0	0	0	-0.03408	0	0	1e-05	0	0	0	-0.00193	0.05987	222	Zn4-H28-C28-N4-O24	0	0	equal_bothsteps	equal	0	Success at all eik	This sg doesnt have any
1126	KEVLEE_FSR	-3e-05	0	0	0	0.04153	0	1e-05	-1e-05	-1e-05	-0.08895	0	0	0.02495	-0.08449	0.03675	0	0	0	0.0954548	mm2	C24-H24-N16-Zn4	0	0	equal_bothsteps	equal	0	Success at all eik	This sg doesnt have any
1127	XANZES_FSR	0.00014	-4e-05	2e-05	0.01819	0	0	0	0	1e-05	0	0.00757	0	0	0	-1e-05	0	0	-0.02396	0.02396	222	Zn4-P4-H28-C16-N8-O12	0	0	equal_bothsteps	equal	0	Success at all eik	This sg doesnt have any
1128	WOTNUQ_FSR	0.01977	-0.01962	7e-05	0.00484	0	0	-5e-05	1e-05	-3e-05	-2e-05	-0.00481	-0.01972	4e-05	4e-05	2e-05	0	0	0	0.0282707	32	Zn3-H12-C6-O18	0	0	equal_bothsteps	equal	0	Success at all eik	Success at all eik
1129	QIXWAX_FSR	-2e-05	5e-05	0.00011	0.04956	-4e-05	0.05332	0.02118	-0.00393	-0.18136	0	0.06425	0	-3e-05	-5e-05	-0.00035	0.04516	8e-05	0.1168	0.193607	2	Zn2-H10-C6-N8-Cl2-O6	0	0	equal_bothsteps	equal	0	Success at all eik	This sg doesnt have any
1130	ECOLOZ_FSR	0	-1e-05	-1e-05	0	0.09418	0	0.0001	4e-05	1e-05	-0.00255	0	0	0.13041	-0.02025	-0.21071	0	0	0	0.248627	mm2	Zn4-H24-C20-N16-O8	0	0	equal_bothsteps	equal	0	Success at all eik	This sg doesnt have any
1131	IQAGEN_FSR	-1e-05	-1e-05	-1e-05	0	0.02265	0	5e-05	5e-05	4e-05	-0.04991	0	0	-0.04777	-0.03246	0.01446	0	0	0	0.0595376	mm2	C52-H40-N4-O12-Zn2	0	0	equal_bothsteps	equal	0	Success at all eik	This sg doesnt have any
1132	FEQREA_FSR	-1e-05	-1e-05	1e-05	0.02307	0	0.04484	0.06251	-0.00346	0.00158	0	0.01671	0	-5e-05	0	1e-05	-0.03633	-2e-05	0.0274	0.0648167	2	C36-H36-N4-O12-Zn4	0	0	equal_bothsteps	equal	0	Success at all eik	This sg doesnt have any
1133	HENYUV_FSR	-4e-05	0	8e-05	-0.0049	0	0	0	-4e-05	8e-05	0	0.0049	0	0	0	0	0	0	0	0.00490147	422	Zn4-H8-C28-N4-O16	0	0	equal_bothsteps	equal	0	Success at all eik	Success at all eik
1134	XEDPON_FSR	0.00057	-0.00048	0.00011	0.06449	0.0374	-0.0001	-0.00019	0.00017	4e-05	-0.03738	0.06447	0.00023	-0.0837	0.08363	-4e-05	0	0	0.06381	0.134433	-4	C28-H24-N16-O8-Zn4	0	0	equal_bothsteps	equal	0	Success at all eik	Success at all eik
1135	FUZVAZ_FSR	-0.02681	0.00172	-0.02928	-0.03734	0.00509	-0.00124	0.01214	0.04185	0.01121	0.0086	0.03044	0.03136	0.02086	0.01072	-0.02573	0.00978	-0.02114	-0.01126	0.0669324	1	Zn2-H48-C68-N4-O12	0	0	equal_bothsteps	equal	0	This sg doesnt have any	This sg doesnt have any
1136	QEYZAY02_FSR	-0.0001	-7e-05	0.0002	-0.07915	0.00066	0.03883	-0.06318	-0.21321	-0.01373	0	-0.00243	0	0.00013	0.00013	4e-05	0.04377	-7e-05	-0.01575	0.222811	2	C22-H26-N4-O8-Zn1	0	0	equal_bothsteps	equal	0	Success at all eik	This sg doesnt have any
1137	YUZCED_FSR	-0.0791	0.08098	-1e-05	0.02802	0	0	-0.0012	-0.0011	-8e-05	-0.00053	-0.02752	0.07972	-0.00014	-0.00014	0	0	0	0	0.116618	32	Zn6-H36-C33-N48-O6	0	0	equal_bothsteps	equal	0	Success at all eik	Success at all eik
1138	PEYGAC_FSR	1e-05	1e-05	1e-05	0	0.12494	0	-0.00017	-0.0001	-0.00011	-0.09676	0	0	0.00761	-0.18615	-0.08029	0	0	0	0.20287	mm2	Zn4-H16-C8-N16-Cl8	0	0	equal_bothsteps	equal	0	Success at all eik	This sg doesnt have any
1139	LEBHUY_FSR	-2e-05	0	-2e-05	-0.03086	0	0	0	0	1e-05	0	0.0605	0	2e-05	0	1e-05	0	0	0.03288	0.0605	222	Zn4-H64-C40-N8-O20	0	0	equal_bothsteps	equal	0	Success at all eik	This sg doesnt have any
1140	DUWTOG_FSR	-1e-05	2e-05	0	0	0.11139	0	2e-05	-2e-05	1e-05	0.03923	0	0	0.10008	0.09249	0.03342	0	0	0	0.140311	mm2	Zn8-H32-C20-N32-O8	0	0	equal_bothsteps	equal	0	Success at all eik	This sg doesnt have any
1141	MUYGOE_FSR	6e-05	4e-05	0.0002	-0.07093	5e-05	-0.06171	-0.03463	0.17283	0.03299	0	-0.03336	0	2e-05	2e-05	5e-05	0.05535	0	-0.10378	0.182403	2	C22-H26-N4-O6-Zn1	0	0	equal_bothsteps	equal	0	Success at all eik	This sg doesnt have any
1142	YUZBIG_FSR	-0.03879	0.03699	5e-05	0.02157	0	0	-0.00034	-0.00051	0.00019	-0.00032	-0.02157	0.03802	-0.00016	-0.00016	2e-05	0	0	0	0.057778	32	Zn6-H36-C30-N48	0	0	equal_bothsteps	equal	0	Success at all eik	Success at all eik
1143	KEWXIV_FSR	0	0	1e-05	0	-0.02614	0	1e-05	1e-05	3e-05	0.0335	0	0	0.00285	-0.13833	0.11716	0	0	0	0.1813	mm2	Zn4-H36-C48-N24-Cl4-O4	0	0	equal_bothsteps	equal	0	Success at all eik	This sg doesnt have any
1144	FUQFAA_FSR	-1e-05	1e-05	1e-05	0.0652	0	0	0	0	0	0	0.0642	0	-1e-05	0	0	0	0	0.05097	0.0652	222	Zn4-H48-C40-Se4-N8-Cl8	0	0	equal_bothsteps	equal	0	Success at all eik	This sg doesnt have any
1145	HULGAY_FSR	0	0	0	0	-0.03191	0	-1e-05	-1e-05	0	0.08246	0	0	-0.02229	-0.00322	-0.01301	0	0	0	0.08246	mm2	Zn4-H32-C56-I12-N20-O16	0	0	equal_bothsteps	equal	0	Success at all eik	This sg doesnt have any
1146	CEHLOT_FSR	-0.00057	-0.00059	-0.00091	-0.14587	0.00085	-0.03044	-0.03862	0.0479	0.10857	0	-0.05384	0	0.00012	0.00016	0.00035	0.03879	-0.00025	-0.07403	0.151459	2	C26-H30-N4-O6-Zn1	0	0	equal_bothsteps	equal	0	Success at all eik	This sg doesnt have any
1147	OBOGUK_FSR	0	0	0	0	-0.04769	0	5e-05	7e-05	6e-05	0.07732	0	0	-0.04893	-0.09894	0.01891	0	0	0	0.111986	mm2	Zn6-H32-C46-O32	0	0	equal_bothsteps	equal	0	Success at all eik	This sg doesnt have any
1148	OHUXAS_FSR	0	0	0	0	-0.0535	0	0	1e-05	0	-0.037	0	0	-0.07595	-0.07598	0.21607	0	0	0	0.241304	mm2	Zn4-H32-C40-N24-O16	0	0	equal_bothsteps	equal	0	Success at all eik	This sg doesnt have any
1149	IMEXAB_FSR	-0.03975	0.05912	0.06516	0	-0.03141	0	0.00012	-0.0003	4e-05	0.00716	-6e-05	-0.07983	-0.07335	0.08199	0.02177	0	0.00369	0	0.143478	m	C50-H46-N10-O26-Zn4	0	0	equal_bothsteps	equal	0	Success at all eik	This sg doesnt have any
1150	LUWVUU_FSR	-7e-05	4e-05	1e-05	0	0.05245	0	0	0	-1e-05	0.01003	0	0	0.05221	0.04758	-0.06202	0	0	0	0.0940012	mm2	Zn4-H40-C48-N8-O16	0	0	equal_bothsteps	equal	0	Success at all eik	This sg doesnt have any
1151	QIKXIR_FSR	1e-05	0	2e-05	0.19518	0	0	0	0	0	0	0.02256	0	2e-05	1e-05	3e-05	0	0	0.12126	0.19518	222	Zn4-H48-C40-S8-N16-O16	0	0	equal_bothsteps	equal	0	Success at all eik	This sg doesnt have any
1152	CUQPUB_FSR	-0.11428	-0.07802	-0.06139	0	0.02203	0	-1e-05	0	0	0.01117	0	-0.09185	0.10188	0.0304	0.10246	0	-0.0653	0	0.215679	m	Zn4-H36-C52-N20-O8	0	0	equal_bothsteps	equal	0	Success at all eik	This sg doesnt have any
1153	DELTAQ01_FSR	-1e-05	0	0	-0.08505	0	0	-1e-05	0	0	0	0.08505	0	0	0	0	0	0	0	0.08505	422	Zn4-H40-C48-N8-O16	0	0	equal_bothsteps	equal	0	Success at all eik	Success at all eik
1154	QICTEC_FSR	1e-05	0	0	0	-0.02156	0	-1e-05	1e-05	1e-05	-0.02157	0	0	-0.03974	-0.03974	0.03993	0	0	0	0.0689416	4mm	Zn8-H40-C12-S8-N4-O32	0	0	equal_bothsteps	equal	0	Success at all eik	Success at all eik
1155	PACVOF_FSR	-0.02919	-0.01955	-0.02247	0	0.00772	0	-5e-05	-6e-05	-5e-05	-0.00187	3e-05	-0.00116	-0.02219	-0.02662	0.02981	0	-0.00608	0	0.0494259	m	C68-Cl4-H52-N4-O16-Zn4	0	0	equal_bothsteps	equal	0	Success at all eik	This sg doesnt have any
1156	EMOTOQ_FSR	0.19976	0.00672	-0.02186	0.00112	0.02298	-0.00509	-0.03053	-0.10289	-0.08357	-0.03564	-0.02446	0.15358	-0.03131	-0.0031	0.02605	-0.07623	-0.00716	-0.03733	0.221451	1	Zn1-H16-C11-N2-O6	0	0	equal_bothsteps	equal	0	This sg doesnt have any	This sg doesnt have any
1157	ESATEY_FSR	0	-1e-05	-1e-05	0	0.15939	0	0	5e-05	1e-05	0.00678	0	0	0.01684	0.0366	0.02619	0	0	0	0.15939	mm2	C68-H48-N8-O20-Zn4	0	0	equal_bothsteps	equal	0	Success at all eik	This sg doesnt have any
1158	PIBLAQ_FSR	2e-05	0.00014	-5e-05	0.0134	0	0	1e-05	0	-1e-05	0	-0.05028	0	0	3e-05	-5e-05	0	0	-0.00553	0.05028	222	Zn4-H60-C40-N8-Cl4-O16	0	0	equal_bothsteps	equal	0	Success at all eik	This sg doesnt have any
1159	NADCUS_FSR	-0.20922	0.00621	0.05977	0	0.07724	0	3e-05	-4e-05	7e-05	0.06951	-1e-05	-0.02323	0.0573	0.07695	0.06426	0	0.07942	0	0.231127	m	C42-H40-N4-O18-S2-Zn4	0	0	equal_bothsteps	equal	0	Success at all eik	This sg doesnt have any
1160	FINQEA_FSR	1e-05	0	0	0.05522	0	0	1e-05	0	-1e-05	0	-0.01932	0	2e-05	1e-05	1e-05	0	0	-0.0228	0.05522	222	Zn4-H64-C40-N8-Cl8-O16	0	0	equal_bothsteps	equal	0	Success at all eik	This sg doesnt have any
1161	VUWXUJ01_FSR	0.01184	-0.01197	-0.00036	-0.00509	0.05215	-0.03558	-0.03357	0.0331	-0.00058	0.05261	0.00517	-0.01175	0.06928	0.06928	-0.30707	0	0	0	0.322322	3	C42-H42-N18-O18-Zn6	0	0	equal_bothsteps	equal	0	Success at all eik	Success at all eik
1162	QARCAP_FSR	0	0	0	0.14409	0	0	0	0	1e-05	0	0.05595	0	0	0	2e-05	0	0	-0.01664	0.14409	222	Zn4-H32-C64-N48	0	0	equal_bothsteps	equal	0	Success at all eik	This sg doesnt have any
1163	DEHHEG_FSR	0	0	0	0.06595	0	0	-1e-05	1e-05	0	0	-0.06595	0	0	0	0	0	0	0	0.06595	422	Zn4-H32-C40-N16-O16	0	0	equal_bothsteps	equal	0	Success at all eik	Success at all eik
1164	YAVMIT_FSR	-1e-05	-1e-05	-1e-05	0.06677	0	0	0	1e-05	-1e-05	0	0.0115	0	0	-1e-05	-1e-05	0	0	0.03008	0.06677	222	Zn4-H24-C40-N32	0	0	equal_bothsteps	equal	0	Success at all eik	This sg doesnt have any
1165	LIHBUB_FSR	0	0.00015	-0.00019	0.05826	0	0	-1e-05	0	0	0	0.05551	0	0	0	-1e-05	0	0	0.10734	0.10734	222	Zn4-H28-C40-N12-O20	0	0	equal_bothsteps	equal	0	Success at all eik	This sg doesnt have any
1166	PASKUS_FSR	1e-05	1e-05	-1e-05	0.03382	0	0	1e-05	-1e-05	0	0	0.00226	0	0	-1e-05	-2e-05	0	0	0.03013	0.03382	222	Zn8-P8-H48-C32-N16-O28	0	0	equal_bothsteps	equal	0	Success at all eik	This sg doesnt have any
1167	HUHCOD_FSR	-3e-05	0	-0.0001	0.09398	2e-05	-0.12988	-0.1512	-0.15571	0.07103	0	0.03858	0	2e-05	1e-05	1e-05	0.00964	1e-05	0.09312	0.231605	2	C22-H22-N4-O4-Zn1	0	0	equal_bothsteps	equal	0	Success at all eik	This sg doesnt have any
1168	EKEHUZ_FSR	-0.0899	0.08994	0	-1e-05	0	0	0.00016	0.00014	-2e-05	1e-05	-4e-05	0.08992	1e-05	1e-05	-1e-05	0	0	0	0.127166	32	Zn6-P6-H42-C18-N6-O18	0	0	equal_bothsteps	equal	0	Success at all eik	Success at all eik
1169	ONOCOL01_FSR	0.00021	-0.00024	2e-05	-0.01504	0	0	-0.00025	0.00021	1e-05	0	0.01504	0	1e-05	1e-05	2e-05	0	0	0	0.0150469	422	Zn4-H40-C48-N16-O16	0	0	equal_bothsteps	equal	0	Success at all eik	Success at all eik
1170	MIHHOB_FSR	1e-05	-1e-05	0	-0.06523	0	0	1e-05	-2e-05	1e-05	0	-0.07443	0	-2e-05	-2e-05	-2e-05	0	0	-0.02479	0.07443	222	Zn4-H32-C48-N24	0	0	equal_bothsteps	equal	0	Success at all eik	This sg doesnt have any
1171	OQOMAK_FSR	1e-05	-2e-05	0	-0.00068	0	0	5e-05	4e-05	7e-05	0	0.03491	0	0	-1e-05	-2e-05	0	0	-0.00979	0.0349101	222	Zn4-H20-C4-N20-O4-F8	0	0	equal_bothsteps	equal	0	Success at all eik	This sg doesnt have any
1172	EFUKIA_FSR	-0.00015	0.00022	1e-05	-0.00016	0.19263	0.32318	0.32326	-0.3231	2e-05	0.19269	0	0	-0.01962	-0.01962	0.01625	0	0	0	0.496004	3m	C9-H6-N12-S4-Zn4	0	0	equal_bothsteps	equal	0	Success at all eik	Success at all eik
1173	MEHRIA_FSR	-0.03485	-0.03943	-0.29929	0.01917	-0.16162	0.04319	0.0634	0.03726	0.16393	0.10316	0.02586	0.06398	-0.09151	0.11533	0.00174	0.00802	-0.01518	0.00361	0.384555	1	Zn1-H9-C4-S4-N9-O4	0	0	equal_bothsteps	equal	0	This sg doesnt have any	This sg doesnt have any
1174	GIFKOY_FSR	0	0	-1e-05	0	0.00948	0	4e-05	0	2e-05	-0.03133	0	0	-0.00279	-0.02994	-0.02757	0	0	0	0.0407958	mm2	C44-H44-N24-O24-S4-Zn6	0	0	equal_bothsteps	equal	0	Success at all eik	This sg doesnt have any
1175	JOMWAJ01_FSR	-1e-05	3e-05	2e-05	0.02992	0	0	-5e-05	0	-3e-05	0	-0.02991	0	0	0	-1e-05	0	0	0	0.02992	422	Zn4-H32-C48-N8-O16	0	0	equal_bothsteps	equal	0	Success at all eik	Success at all eik
1176	JUKVEQ01_FSR	-8e-05	-5e-05	-9e-05	-0.01355	0	0	-2e-05	-2e-05	-5e-05	0	-0.02963	0	-4e-05	-1e-05	-2e-05	0	0	-0.04101	0.04101	222	Zn4-H32-C48-N8-O16	0	0	equal_bothsteps	equal	0	Success at all eik	This sg doesnt have any
1177	QOBHIY_FSR	0	0	1e-05	0	0.12751	0	0.00015	2e-05	1e-05	0.14507	0	0	0.05648	0.1285	-0.48831	0	0	0	0.508084	mm2	C6-H20-N4-Te4-Zn4	0	0	equal_bothsteps	equal	0	Success at all eik	This sg doesnt have any
1178	POVFUE01_FSR	-0.00147	-0.00277	-0.00483	0.00034	-0.03941	-0.00687	-0.00912	0.00661	-0.00231	-0.04018	0	0	0.03489	0.03489	0.04975	0	0	0	0.0704806	3m	C54-H30-N30-Zn6	0	0	equal_bothsteps	equal	0	Success at all eik	Success at all eik
1179	OBERUL_FSR	0.01147	0.01855	-0.04556	0.00062	-0.02813	0.06561	0.10751	-0.15415	-0.08483	-0.01605	0.03142	-0.03769	-0.04882	-0.00944	0.02103	-0.06472	-0.05058	0.02437	0.215864	1	Zn1-H12-C16-N2-O8	0	0	equal_bothsteps	equal	0	This sg doesnt have any	This sg doesnt have any
1180	ZOMNOG_FSR	-0.00022	-5e-05	6e-05	0.00704	-1e-05	0.09583	0.0908	0.08892	-0.00728	0	0.04192	0	0.0001	4e-05	1e-05	-0.00776	3e-05	0.06099	0.134022	2	C14-H18-N4-O4-S1-Zn1	0	0	equal_bothsteps	equal	0	Success at all eik	This sg doesnt have any
1181	RAJRUP_FSR	-0.11803	0.02408	-0.08164	0	0.10558	0	0.00011	-2e-05	1e-05	-0.05936	-1e-05	0.08278	0.11748	0.01439	0.01586	0	0.07756	0	0.187761	m	C56-H44-N4-O16-Zn4	0	0	equal_bothsteps	equal	0	Success at all eik	This sg doesnt have any
1182	NELWUY_FSR	3e-05	5e-05	7e-05	-0.00632	2e-05	-0.02468	-0.06239	0.02806	-0.08497	0	0.00569	0	-5e-05	-3e-05	-4e-05	-0.04734	-3e-05	0.03999	0.109234	2	C12-H22-N4-O8-Zn1	0	0	equal_bothsteps	equal	0	Success at all eik	This sg doesnt have any
1183	ZEKNUB_FSR	3e-05	4e-05	-3e-05	0	0.07446	0	1e-05	1e-05	1e-05	-0.03337	0	0	0.04361	-0.06272	-0.01143	0	0	0	0.0772417	mm2	C64-H56-N8-O16-Zn4	0	0	equal_bothsteps	equal	0	Success at all eik	This sg doesnt have any
1184	MOXFUB_FSR	-1e-05	1e-05	-1e-05	-0.01126	0	0	-1e-05	1e-05	1e-05	0	0.01251	0	0	0	1e-05	0	0	-0.0072	0.01251	222	Zn4-H64-C44-I8-N16	0	0	equal_bothsteps	equal	0	Success at all eik	This sg doesnt have any
1185	FIPXEJ_FSR	1e-05	0	2e-05	0.01612	0	-0.03446	-0.02368	-0.00891	-0.08506	0	0.02603	0	1e-05	0	1e-05	-0.07329	0	0.04191	0.0924819	2	Zn4-H48-C36-N16-O12	0	0	equal_bothsteps	equal	0	Success at all eik	This sg doesnt have any
1186	BUVKAG_FSR	1e-05	-5e-05	-4e-05	0.03777	-1e-05	0.03493	0.00554	0.03006	-0.03909	0	0.00125	0	3e-05	-4e-05	-0.00012	0.02825	0	6e-05	0.0559969	2	C18-H22-N4-O6-Zn1	0	0	equal_bothsteps	equal	0	Success at all eik	This sg doesnt have any
1187	TISLAJ_FSR	-1e-05	-1e-05	0	0	0.22968	0	2e-05	2e-05	2e-05	0.01655	0	0	0.2594	0.15389	0.4665	0	0	0	0.555511	mm2	Zn8-H16-C24-N24-O16	0	0	equal_bothsteps	equal	0	Success at all eik	This sg doesnt have any
1188	HESMIE_FSR	0.01843	0.00301	-0.02317	0.01704	-0.01593	0.04412	0.06893	0.02257	0.00887	-0.013	0.02367	0.04647	0.02526	0.01182	-0.01033	-0.00039	0.00378	0.03804	0.107142	1	Zn8-H48-C48-N4-O30	0	0	equal_bothsteps	equal	0	This sg doesnt have any	This sg doesnt have any
1189	ICEMAF_FSR	-0.00485	-0.04085	-0.03583	0	-0.14965	0	-5e-05	-3e-05	4e-05	0.05276	-1e-05	-0.10147	-0.08825	0.03641	-0.02728	0	-0.08727	0	0.187051	m	C58-H44-N4-O16-Zn4	0	0	equal_bothsteps	equal	0	Success at all eik	This sg doesnt have any
1190	BENKOW_FSR	0	0	0	0	0.16197	0	0	0	0	-0.00719	0	0	0.15404	-0.083	-0.10863	0	0	0	0.205956	mm2	Zn4-P4-H16-C8-N12-O16	0	0	equal_bothsteps	equal	0	Success at all eik	This sg doesnt have any
1191	RUVBAN_FSR	5e-05	1e-05	-6e-05	0.02779	2e-05	-0.02206	0.00152	0.06964	-0.15829	0	0.03508	0	-2e-05	-5e-05	9e-05	-0.25888	-4e-05	0.09197	0.276779	2	C18-H12-N6-O4-Zn1	0	0	equal_bothsteps	equal	0	Success at all eik	This sg doesnt have any
1192	VUWTAL_FSR	-0.00119	0.00144	0.0005	0.00251	0.03962	-0.01484	-0.01346	0.01371	-0.0004	0.03542	0	0	0.07463	0.07463	-0.23715	0	0	0	0.259576	3m	C36-H30-N18-O18-Zn6	0	0	equal_bothsteps	equal	0	Success at all eik	Success at all eik
1193	MEHVIH_FSR	-4e-05	-0.00012	3e-05	0	-0.04262	0	0.00106	0.00027	-0.00022	0.0687	0	0	-0.09495	0.08766	0.00187	0	0	0	0.129243	mm2	C48-Cl4-H32-N12-O4-Zn4	0	0	equal_bothsteps	equal	0	Success at all eik	This sg doesnt have any
1194	UNISUH_FSR	0.00072	0.00027	0.00026	0.04794	0.00017	0.03306	0.08983	-0.01975	0.06177	0	0.04155	0	-0.00016	-1e-05	7e-05	0.02328	-6e-05	0.01122	0.11833	2	C26-H20-O14-P2-Zn5	0	0	equal_bothsteps	equal	0	Success at all eik	This sg doesnt have any
1195	MAWVAK_FSR	-6e-05	-1e-05	-3e-05	0.02043	-0.0184	-2e-05	-1e-05	-5e-05	1e-05	-0.01835	-0.02046	-1e-05	-0.05734	-0.05734	-0.0436	0	0	0	0.0920691	4	Zn4-H56-C44-N8-O16	0	0	equal_bothsteps	equal	0	Success at all eik	Success at all eik
1196	MIQTOX_FSR	1e-05	0.00013	-1e-05	-0.03079	0	0	0	0	-1e-05	0	0.02069	0	-2e-05	-1e-05	-2e-05	0	0	-0.07644	0.07644	222	Zn4-H56-C56-N24-O8	0	0	equal_bothsteps	equal	0	Success at all eik	This sg doesnt have any
1197	FAPYOM_FSR	-0.0005	0.00038	-0.00101	-0.03356	0	0	-1e-05	0	1e-05	0	-0.03258	0	1e-05	1e-05	4e-05	0	0	-0.01742	0.0335811	222	Zn4-H36-C48-N4-O12	0	0	equal_bothsteps	equal	0	Success at all eik	This sg doesnt have any
1198	EMOTEG_FSR	-3e-05	1e-05	0	-0.03615	0.00845	-1e-05	1e-05	-3e-05	-3e-05	0.00844	0.03616	-1e-05	-0.16429	-0.16429	-0.17113	0	0	0	0.288562	4	Zn4-H56-C40-N8-O24	0	0	equal_bothsteps	equal	0	Success at all eik	Success at all eik
1199	CIJWID_FSR	-1e-05	0	0	-0.04434	0	0	0	-1e-05	0	0	-0.03008	0	-1e-05	0	1e-05	0	0	-0.04642	0.04642	222	Zn4-H48-C40-N16-O16	0	0	equal_bothsteps	equal	0	Success at all eik	This sg doesnt have any
1200	MUDTAJ_FSR	-0.00227	-0.00259	-0.00466	-0.00043	0.01196	0.02091	0.01932	-0.02208	-0.00224	0.01254	0	0	0.03501	0.03501	0.06015	0	0	0	0.0782109	3m	C60-H30-N30-O12-Zn6	0	0	equal_bothsteps	equal	0	Success at all eik	Success at all eik
1201	QEYZAY01_FSR	-0.00031	-0.00025	-0.00066	-0.11763	0.00013	0.09335	0.00672	-0.13969	-0.03518	0	-0.02525	0	-3e-05	1e-05	0.00017	0.10875	3e-05	-0.08997	0.206079	2	C22-H26-N4-O8-Zn1	0	0	equal_bothsteps	equal	0	Success at all eik	This sg doesnt have any
1202	BEKVOD_FSR	-0.00179	-0.00087	-0.00251	-0.00037	0.04585	0.16597	0.16628	-0.16712	-0.00069	0.04628	0	0	0.0426	0.0426	0.09687	0	0	0	0.240253	3m	C48-H36-N24-O12-Zn6	0	0	equal_bothsteps	equal	0	Success at all eik	Success at all eik
1203	FEHJIN01_FSR	0	0	-1e-05	0	-0.16948	0	0	0	0	0.07413	0	0	-0.21151	-0.08837	-0.18203	0	0	0	0.292713	mm2	Zn4-P4-H40-C36-N4-O20	0	0	equal_bothsteps	equal	0	Success at all eik	This sg doesnt have any
1204	LIWXIZ_FSR	3e-05	4e-05	3e-05	0.02906	2e-05	-0.03087	0.01214	0.10762	0.04799	0	0.11419	0	3e-05	3e-05	2e-05	0.04209	1e-05	0.07051	0.164535	2	Zn4-H40-C62-N8-O18	0	0	equal_bothsteps	equal	0	Success at all eik	This sg doesnt have any
1205	NIBRUN_FSR	-2e-05	0.00011	-0.00015	-0.00089	0	0	-6e-05	0.00012	7e-05	0	-0.00676	0	-0.00037	0.0001	-0.0001	0	0	-0.0155	0.0155051	222	Zn4-H20-C40-N12-O16	0	0	equal_bothsteps	equal	0	Success at all eik	This sg doesnt have any
1206	SARBOE_FSR	-2e-05	-7e-05	-3e-05	-0.15397	0	0	6e-05	8e-05	4e-05	0	-0.04897	0	-5e-05	-7e-05	-3e-05	0	0	-0.00708	0.15397	222	Zn4-H40-C48-N16-O16	0	0	equal_bothsteps	equal	0	Success at all eik	This sg doesnt have any
1207	BIYTEJ_FSR	0	6e-05	1e-05	0.08244	0.05403	-9e-05	2e-05	1e-05	0	0.05414	-0.08221	5e-05	-0.00621	-0.00621	0.10008	0	0	0	0.100465	6	Zn6-H12-C36-N60	0	0	equal_bothsteps	equal	0	Success at all eik	Success at all eik
1208	LUWSOL_FSR	-3e-05	0	1e-05	0	-0.10169	0	-1e-05	0	0	0.07605	0	0	-0.08367	0.07616	0.07886	0	0	0	0.137913	mm2	Zn4-H60-C48-S4-N12-O16	0	0	equal_bothsteps	equal	0	Success at all eik	This sg doesnt have any
1209	VUWXUJ06_FSR	0.0099	-0.0103	-0.00013	-0.00569	-0.04738	0.04399	0.04641	-0.04637	0.00041	-0.04722	0.00566	-0.00703	-0.02804	-0.02804	0.32904	0	0	0	0.331421	3	C42-H42-N18-O18-Zn6	0	0	equal_bothsteps	equal	0	Success at all eik	Success at all eik
1210	PEWDEC_FSR	2e-05	-1e-05	-1e-05	-0.20603	4e-05	-0.22296	-0.03154	-0.07057	-0.07257	0	-0.05261	0	1e-05	-4e-05	3e-05	-0.01582	-1e-05	-0.00207	0.303825	2	Zn4-H56-C40-O16	0	0	equal_bothsteps	equal	0	Success at all eik	This sg doesnt have any
1211	MEHCAG_FSR	2e-05	0	1e-05	-0.07166	0	0	0	0	0	0	-0.06462	0	-1e-05	-1e-05	2e-05	0	0	-0.0278	0.07166	222	Zn4-H36-C56-N4-O20	0	0	equal_bothsteps	equal	0	Success at all eik	This sg doesnt have any
1212	DEHYOF_FSR	-0.0031	-0.00181	-0.01121	0	-0.03949	0	-4e-05	0.00044	0.00055	0.22458	7e-05	-0.02835	-0.02023	0.19904	0.13373	0	0.02268	0	0.241982	m	C28-H24-N4-O20-P4-Zn6	0	0	equal_bothsteps	equal	0	Success at all eik	This sg doesnt have any
1213	OFIXOR_FSR	0	-1e-05	0	0	-0.0185	0	-2e-05	-3e-05	1e-05	-0.01725	0	0	0.11281	0.00672	0.43544	0	0	0	0.449866	mm2	Zn4-H28-C40-N4-O12	0	0	equal_bothsteps	equal	0	Success at all eik	This sg doesnt have any
1214	CIFGOP_FSR	-0.03862	-0.03603	0.10634	0	0.0085	0	0	0	3e-05	0.08133	0	-0.01643	-0.00797	0.03793	-0.03253	0	0.02954	0	0.125137	m	Zn4-H52-C60-N4-O20	0	0	equal_bothsteps	equal	0	Success at all eik	This sg doesnt have any
1215	FUQDUS_FSR	1e-05	0	0	0.06617	0	0	-1e-05	0	0	0	0.04833	0	-1e-05	0	-1e-05	0	0	0.06688	0.06688	222	Zn4-H48-C40-S4-N8-Cl8	0	0	equal_bothsteps	equal	0	Success at all eik	This sg doesnt have any
1216	REFGUG_FSR	1e-05	1e-05	1e-05	-0.02212	0	0	0	0	0	0	-0.01752	0	0	0	1e-05	0	0	-0.02245	0.02245	222	Zn4-H40-C44-N24-O8	0	0	equal_bothsteps	equal	0	Success at all eik	This sg doesnt have any
1217	MUCKIF_FSR	1e-05	0	2e-05	0.04578	2e-05	-0.05159	-0.0399	0.00695	0.03939	0	0.00238	0	2e-05	-6e-05	-4e-05	0.02666	4e-05	-0.00149	0.071678	2	Zn4-P4-H64-C40-N4-Cl8-O12	0	0	equal_bothsteps	equal	0	Success at all eik	This sg doesnt have any
1218	DEMVAT01_FSR	0	0	0	0	-0.02814	0	0	2e-05	0	0.03975	0	0	-0.06267	0.12541	0.05852	0	0	0	0.15192	mm2	Zn4-H40-C48-N16-Cl8	0	0	equal_bothsteps	equal	0	Success at all eik	This sg doesnt have any
1219	IWOWIB_FSR	-0.00042	-3e-05	6e-05	-0.00349	0.00029	0.1564	0.21903	-0.06518	-0.05102	0	-0.02384	0	-0.0002	-2e-05	-1e-05	-0.04885	-0.0001	-0.0383	0.23536	2	C27-H20-N6-O12-Zn1	0	0	equal_bothsteps	equal	0	Success at all eik	This sg doesnt have any
1220	NIPWIT01_FSR	-1e-05	2e-05	-3e-05	0	-0.13939	0	0	-2e-05	0	0.04574	0	0	-0.10917	-0.0776	0.33501	0	0	0	0.360793	mm2	Zn8-H20-C28-N4-O24	0	0	equal_bothsteps	equal	0	Success at all eik	This sg doesnt have any
1221	WAZNUJ_FSR	1e-05	-5e-05	0.00034	-0.03567	0	0	-1e-05	1e-05	-4e-05	0	-0.07473	0	2e-05	-2e-05	4e-05	0	0	-0.04385	0.07473	222	Zn4-H40-C44-S4-N16-O16	0	0	equal_bothsteps	equal	0	Success at all eik	This sg doesnt have any
1222	HORWEQ_FSR	3e-05	2e-05	0	0	-0.04762	0	2e-05	0	-2e-05	-0.04761	0	0	-0.11908	-0.11908	-0.11806	0	0	0	0.205665	6mm	Cu12-H18-C18-Br12-N18	0	0	equal_bothsteps	equal	0	Success at all eik	Success at all eik
1223	CUNFEX_FSR	8e-05	0.00015	-4e-05	-0.02947	6e-05	0.08012	0.03965	-0.01214	0.03112	0	-0.03149	0	3e-05	0.00014	0.00022	0.08329	3e-05	-0.01552	0.104553	2	C24-Cu2-H18-I2-N4-O3	0	0	equal_bothsteps	equal	0	Success at all eik	This sg doesnt have any
1224	XISDEJ01_FSR	1e-05	-1e-05	-3e-05	0.03266	7e-05	-0.01733	-0.0733	-0.08766	0.05685	0	0.06026	0	0.00011	-3e-05	4e-05	0.03734	7e-05	0.03398	0.141139	2	Cu2-H26-C22-N2-O12	2	2	equal_bothsteps	equal	2	Success at all eik	This sg doesnt have any
1225	FABJID_FSR	0.05699	-0.01407	-0.0645	0	0.05745	0	0	7e-05	6e-05	-0.05348	-3e-05	0.04658	0.09071	0.13247	0.19275	0	-0.04992	0	0.26066	m	Cu2-H16-C24-N4-Cl2-O8	0	0	equal_bothsteps	equal	0	Success at all eik	This sg doesnt have any
1226	RARZAN_FSR	-0.00089	-0.00034	0.00101	0.04673	-0.00088	0.00585	0.03785	-0.00984	0.03599	0.00088	0.08308	-0.00168	0.02225	0.0241	0.02108	-0.02092	-0.00202	0.09963	0.110914	2	Cu2-H24-C20-N4-O10	0	2	notequal_bothsteps	equal	0	Failed at e35	This sg doesnt have any
1227	OREMUU_FSR	0.06482	0.01892	0.11781	0	0.04623	0	-3e-05	-4e-05	1e-05	0.00105	1e-05	0.01423	0.17264	0.13319	0.07771	0	0.04313	0	0.261482	m	C12-Cl2-Cu2-H8-N4	0	0	equal_bothsteps	equal	0	Success at all eik	This sg doesnt have any
1228	SENTOW_FSR	-7e-05	-0.00012	-0.00012	-0.10856	-9e-05	-0.02203	0.11919	-0.15094	0.03726	0	0.07049	0	-0.00018	-5e-05	0.00017	0.04964	-9e-05	-0.13663	0.208198	2	Cu2-H18-C10-S2-N2-O12	0	2	notequal_bothsteps	equal	0	Success at all eik	This sg doesnt have any
1229	EPOPUW_FSR	2e-05	0	-8e-05	-0.0043	0.00011	0.12081	-0.06817	0.32879	0.16237	0	0.07954	0	-4e-05	4e-05	5e-05	0.0746	-5e-05	0.01837	0.381367	2	Cu2-H20-C12-N4-O8	0	2	notequal_bothsteps	equal	0	Success at all eik	This sg doesnt have any
1230	HERPUQ_FSR	0	0	0	0.08664	0	0.02323	-0.0012	0.04139	0.0447	0	0.10798	0	0	0	0	0.07922	0	0.01358	0.123985	2	Cu2-H30-C34-Br2-N8-O8	2	2	equal_bothsteps	equal	2	Success at all eik	This sg doesnt have any
1231	QADHOT01_FSR	5e-05	1e-05	1e-05	0.02831	-1e-05	-0.00755	-0.10601	0.02082	-0.01019	0	0.04001	0	-1e-05	-2e-05	-3e-05	-0.01455	-1e-05	0.01245	0.115656	2	Cu2-H18-C28-N2-O6	0	2	notequal_bothsteps	equal	0	Success at all eik	This sg doesnt have any
1232	FIZSUE_FSR	0	1e-05	-1e-05	0.00913	0	0	2e-05	-1e-05	0	0	0.00452	0	0	-1e-05	0	0	0	0.00225	0.00913001	222	Cu16-H64-C32-S8-I16	0	0	equal_bothsteps	equal	0	Success at all eik	This sg doesnt have any
1233	FISPOP_FSR	-4e-05	0	0.00014	-0.01138	9e-05	0.02788	0.00693	-0.0009	0.01729	0	-0.02712	0	0.00023	0.00013	0.00033	0.01095	4e-05	-0.03895	0.0503627	2	Cu2-H16-C26-S2-N6-O2	0	0	equal_bothsteps	equal	0	Success at all eik	This sg doesnt have any
1234	PIZQEW_FSR	0.01234	0.08259	0.00819	0.02353	0.00347	0.00244	0.01556	-0.04256	0.02576	-0.00272	0.01182	0.00622	0.01953	0.06917	0.03125	0.06075	0.01326	-0.0381	0.13491	1	Cu2-H40-C30-N10-O6	0	0	equal_bothsteps	equal	0	This sg doesnt have any	This sg doesnt have any
1235	ELENEP_FSR	-0.07744	-0.0139	-0.05068	-0.06948	0.00602	0.05051	0.19354	0.24782	0.27169	0.04106	-0.01703	-0.00492	-0.15933	-0.10332	-0.26815	-0.00763	0.04587	0.00599	0.533356	1	Cu2-H26-C16-N6-O8	0	0	equal_bothsteps	equal	0	This sg doesnt have any	This sg doesnt have any
1236	BEJZOF_FSR	-0.22847	-0.0519	-0.07692	0	0.08917	0	-0.00044	0.00085	-0.00013	0.13101	0.00036	-0.19797	0.21694	0.23131	0.15722	0	-0.11413	0	0.440796	m	C20-Cl4-Cu2-H16-N4	0	2	notequal_bothsteps	equal	0	Success at all eik	This sg doesnt have any
1237	LELCOV_FSR	2e-05	-1e-05	-4e-05	-0.04853	-1e-05	0.03729	0.06392	-0.04246	-0.02386	0	-0.01628	0	3e-05	-0.00013	0	0.04875	-0.00011	-0.00903	0.0819938	2	Cu2-H20-C26-N4-O8	0	2	notequal_bothsteps	equal	0	Success at all eik	This sg doesnt have any
1238	ADOQOC_FSR	3e-05	1e-05	-1e-05	0	-0.04214	0	-0.00017	-1e-05	6e-05	-0.02493	0	0	-0.31135	0.15465	0.33278	0	0	0	0.481246	mm2	C12-Cu2-H16-N20	2	0	notequal_bothsteps	equal	2	Success at all eik	This sg doesnt have any
1239	WURNOM_FSR	-0.04758	0.0063	0.02178	0	-0.1547	0	1e-05	-3e-05	-2e-05	-0.14354	0.00011	-0.01477	0.01815	-0.06162	-0.10002	0	-0.00713	0	0.164707	m	Cu2-H28-C28-I2-N4-O4	0	0	equal_bothsteps	equal	0	Success at all eik	This sg doesnt have any
1240	SAWVIV_FSR	0.00021	0.00045	0.0003	-0.00951	-3e-05	-0.13042	-0.1772	-0.21706	0.05765	0	0.02163	0	-5e-05	-0.00016	-0.00028	-0.06855	-2e-05	-0.03569	0.286891	2	Cu2-H18-C26-N2-Cl2	0	0	equal_bothsteps	equal	0	Success at all eik	This sg doesnt have any
1241	PASQUX_FSR	0.05017	0.17868	0.11083	0	-0.01932	0	-3e-05	7e-05	-0.00024	0.05058	-1e-05	0.05084	-0.0187	-0.00936	0.061	0	0.01808	0	0.217799	m	C24-Cu2-H20-N4-O12	0	0	equal_bothsteps	equal	0	Success at all eik	This sg doesnt have any
1242	IQUBOM01_FSR	-0.09141	0.11209	0.0442	0	0.04043	0	2e-05	-0.00016	-6e-05	-0.06227	-4e-05	0.01683	0.07168	-0.03991	0.03455	0	-0.01513	0	0.171272	m	C22-Cu2-H30-N10-O2	0	2	notequal_bothsteps	equal	0	Success at all eik	This sg doesnt have any
1243	BAHGUN01_FSR	0.03141	-0.04085	0.06735	6e-05	0.07346	-0.0001	0.00049	0.00129	0.00164	-0.00753	-3e-05	-0.10997	0.08107	0.0638	0.02345	0.00154	0.00673	0.00056	0.118512	m	C24-Cu2-H16-N4-O8	2	2	equal_bothsteps	notequal	0	Success at all eik	This sg doesnt have any
1244	UGENUP_FSR	0	1e-05	0	0	-0.11022	0	-0.00016	0.00013	-0.0003	-0.06579	0	0	-0.02202	0.02818	0.1077	0	0	0	0.113483	mm2	C28-Cu2-H18-N12-S2	0	0	equal_bothsteps	equal	0	Success at all eik	This sg doesnt have any
1245	ICAGIE_FSR	1e-05	0	2e-05	0.04696	-1e-05	-0.0242	-0.08964	-0.02984	-0.00944	0	0.02363	0	0	0	0	0.0217	1e-05	0.02647	0.097843	2	Cu2-H16-C24-N8-O4	0	2	notequal_bothsteps	equal	0	Success at all eik	This sg doesnt have any
1246	DIDNOV_FSR	0.01852	0.00522	0.00844	-0.00518	0.00772	-0.00033	0.00686	0.01414	0.01405	0.0082	-0.00787	-0.00746	-0.00209	-0.00015	-0.00375	0.00146	0.00025	-0.01097	0.0283593	1	Cu2-H18-C22-N4	0	0	equal_bothsteps	equal	0	This sg doesnt have any	This sg doesnt have any
1247	VEFTAB_FSR	0	0	-1e-05	0.06354	0	0.02997	0.00986	0.02852	-0.0172	0	-0.06486	0	-1e-05	0	0	-0.05975	-1e-05	0.04185	0.0876247	2	Cu2-H16-C18-N4-Cl2	0	0	equal_bothsteps	equal	0	Success at all eik	This sg doesnt have any
1248	ANIYUS_FSR	2e-05	5e-05	2e-05	0.05181	-1e-05	0.03593	0.06775	0.02266	0.01712	0	-0.04969	0	3e-05	1e-05	1e-05	-0.01378	0	-0.0402	0.088689	2	Cu2-H20-C16-O20	0	2	notequal_bothsteps	equal	0	Success at all eik	This sg doesnt have any
1249	LOVTAR_FSR	0	0	0	0	-0.05451	0	0.00013	0.00021	7e-05	-0.06678	0	0	-0.06335	-0.10757	0.16396	0	0	0	0.206076	mm2	C18-Cu2-H16-N10-O4-S2	0	0	equal_bothsteps	equal	0	Success at all eik	This sg doesnt have any
1250	SAWWIW_FSR	1e-05	0	0	0	0.03415	0	0	-0.0001	5e-05	0.16131	0	0	0.01741	0.02949	0.17431	0	0	0	0.177642	mm2	Cu2-H18-C14-N2-Cl2	0	0	equal_bothsteps	equal	0	Success at all eik	This sg doesnt have any
1251	QAZKEK_FSR	0.01619	-0.03613	-0.01095	0	-0.0026	0	6e-05	7e-05	8e-05	-0.03883	4e-05	-0.02606	0.00681	-0.0377	0.05064	0	0.03792	0	0.0751006	m	C20-Cu2-H14-N6-O8	0	2	notequal_bothsteps	equal	0	Success at all eik	This sg doesnt have any
1252	AGUTEC_FSR	0.05459	-0.25113	-0.09369	0	-0.05434	0	-0.00166	0.00114	0.00366	0.30515	-0.00037	-0.1772	-0.18488	-0.02247	0.22943	0	0.03204	0	0.353073	m	Br8-C16-Cd2-Cu2-H28-N24-O6	2	2	equal_bothsteps	equal	2	Success at all eik	This sg doesnt have any
1253	GOGCAH_FSR	0.27326	-0.08903	-0.01794	0.00194	-0.11872	-0.0004	-0.02235	-0.02573	-0.0287	-0.05578	-0.00304	-0.02126	-0.20024	-0.00522	0.04124	0.00106	0.05763	-0.00103	0.371851	m	C14-Cu2-H18-N2-O14	2	2	equal_bothsteps	notequal	0	Failed at e36	This sg doesnt have any
1254	NECCUU_FSR	1e-05	2e-05	1e-05	0.05286	0	-0.00482	-0.05863	0.01731	-0.02139	0	0.02516	0	2e-05	0	2e-05	0.01201	0	0.01427	0.0694814	2	C27-Cu2-H22-N2-P2	0	0	equal_bothsteps	equal	0	Success at all eik	This sg doesnt have any
1255	JAKROD_FSR	0	1e-05	0	0.03631	0	0	3e-05	2e-05	2e-05	0	-0.00836	0	2e-05	3e-05	1e-05	0	0	0.00439	0.03631	222	Cu12-H36-C48-S12-N24	0	0	equal_bothsteps	equal	0	Success at all eik	This sg doesnt have any
1256	BAGPOP01_FSR	-0.15491	0.10825	-0.08382	0.00182	-0.04026	3e-05	-0.00432	-0.00449	-0.0066	0.01464	0.00541	-0.00198	0.06506	0.07059	0.13793	0.00307	-0.16111	-0.00043	0.241565	m	C28-Cu2-H16-N16	2	2	equal_bothsteps	notequal	0	Success at all eik	This sg doesnt have any
1257	MEWSUF_FSR	0.00015	5e-05	-0.00021	0.00737	0.00015	-0.10722	-0.10787	-0.17182	-0.01375	0	-0.0407	0	-0.00031	-0.00012	0.00011	-0.11193	0	0.04352	0.207373	2	Cu2-H32-C20-N6-Cl2-O6	0	2	notequal_bothsteps	equal	0	Success at all eik	This sg doesnt have any
1258	FACRAF_FSR	-1e-05	1e-05	0	-0.02772	-1e-05	-0.06575	-0.07477	0.16276	0.02187	0	0.04007	0	0	0	1e-05	0.10245	0	0.10784	0.184839	2	Cu2-H38-C24-N4-Cl2-O6	0	2	notequal_bothsteps	equal	0	Success at all eik	This sg doesnt have any
1259	HAZROP_FSR	-0.00013	2e-05	-5e-05	0.08812	0	0	-0.00021	-0.00041	-0.00011	0	0.08816	0	-3e-05	-3e-05	-0.00015	0	0	0.08625	0.0881613	-42m	C40-Cu12-H40-I8-N8-S8-W2	0	0	equal_bothsteps	equal	0	Success at all eik	Success at all eik
1260	XUZHOR_FSR	1e-05	0	0	0	-0.00896	0	0.00141	-0.00102	0.00422	0.11983	0	0	-0.04696	0.02988	-0.13286	0	0	0	0.144281	mm2	Cu2-H22-C18-I2-N12	0	2	notequal_bothsteps	equal	0	Success at all eik	This sg doesnt have any
1261	NOPQIU_FSR	-0.43063	-0.04115	-0.10078	-0.0032	0.09367	-0.00955	0.02041	0.02314	0.01615	-0.0009	0.0004	-0.04939	0.36955	0.04131	0.05317	-0.00077	-0.1004	0.00193	0.597501	m	C24-Cl4-Cu2-H18-N6-S2	0	0	equal_bothsteps	equal	0	Failed at e36	This sg doesnt have any
1262	HEYQUA_FSR	1e-05	-2e-05	-1e-05	0.12409	1e-05	-0.0349	0.10276	-0.02386	0.01044	0	0.0456	0	1e-05	1e-05	1e-05	0.00999	0	-0.14265	0.158238	2	Cu2-H30-C26-S2-N2-O8	0	0	equal_bothsteps	equal	0	Success at all eik	This sg doesnt have any
1263	MISQUB_FSR	0.16333	-0.0451	0.03581	0	-0.0759	0	-2e-05	0	-2e-05	-0.03356	-1e-05	0.01143	-0.12725	-0.04312	0.1633	0	0.04049	0	0.240776	m	C12-Cu2-H16-N4-O14	2	2	equal_bothsteps	equal	2	Success at all eik	This sg doesnt have any
1264	CUXVEX_FSR	0.00014	-1e-05	0.00035	-0.04211	0	0	5e-05	0	9e-05	0	-0.03747	0	-4e-05	-5e-05	3e-05	0	0	0.00423	0.0421117	222	Cu12-H40-C48-I12-N16	0	0	equal_bothsteps	equal	0	Success at all eik	This sg doesnt have any
1265	SOKQIT_FSR	1e-05	1e-05	0	-0.0321	0	0.1184	0.09567	0.13762	-0.03113	0	0.00302	0	-1e-05	0	-4e-05	0.12527	0	0.07276	0.1705	2	Cu2-H34-C26-N10-O4	0	2	notequal_bothsteps	equal	0	Success at all eik	This sg doesnt have any
1266	HEYREL_FSR	-1e-05	0	-1e-05	-0.20978	1e-05	0.16915	0.02688	0.13246	0.17162	0	-0.00841	0	-5e-05	0	-1e-05	-0.09427	-2e-05	0.17003	0.326762	2	Cu2-H30-C26-S2-N2-O8	0	0	equal_bothsteps	notequal	2	Success at all eik	This sg doesnt have any
1267	VOZQEI03_FSR	3e-05	1e-05	3e-05	-0.04225	1e-05	0.06372	0.03733	0.02728	-0.00523	0	0.0078	0	1e-05	0	2e-05	0.05335	0	0.06976	0.0957116	2	Cu2-H34-C30-N10-O2	2	2	equal_bothsteps	equal	2	Success at all eik	This sg doesnt have any
1268	SEKLEC01_FSR	0.08754	0.0653	0.02867	0	-0.00152	0	5e-05	3e-05	-4e-05	0.12494	0	-0.08331	0.04599	-0.03176	0.17588	0	-0.02205	0	0.191347	m	Cu2-H14-C16-S2-O4	0	0	equal_bothsteps	equal	0	Success at all eik	This sg doesnt have any
1269	KUBCIU_FSR	-0.16244	-0.17279	-0.03008	0	-0.05843	0	-9e-05	7e-05	-0.00016	-0.0887	2e-05	-0.08341	0.12755	0.41355	0.03917	0	0.06301	0	0.494065	m	C20-Cu2-H14-N10-S4	2	2	equal_bothsteps	equal	2	Success at all eik	This sg doesnt have any
1270	TABFIO_FSR	0	0	0	0	-0.16338	0	1e-05	-1e-05	-1e-05	-0.09079	0	0	0.00953	-0.0993	-0.17879	0	0	0	0.204737	mm2	C20-Cu2-H20-N20-O12	2	2	equal_bothsteps	equal	2	Success at all eik	This sg doesnt have any
1271	TELFIC_FSR	-0.17984	0.09152	-0.06201	0	-0.0845	0	5e-05	-7e-05	1e-05	-0.01515	0	0.04801	-0.07623	0.04027	-0.12271	0	-0.09297	0	0.27541	m	Cu2-H20-C20-S4-N6-Cl2	0	2	notequal_bothsteps	equal	0	Success at all eik	This sg doesnt have any
1272	KULCAX_FSR	0.59381	-0.01499	0.01593	0	-0.12595	0	8e-05	-5e-05	-1e-05	0.01354	3e-05	-0.0023	-0.0687	-0.2673	0.05191	0	0.02953	0	0.611799	m	C12-Cu2-H20-N4-O8	2	2	equal_bothsteps	equal	2	Success at all eik	This sg doesnt have any
1273	HADVUE_FSR	-3e-05	-1e-05	0	-0.06245	1e-05	-0.0745	-0.14775	0.23283	0.05031	0	-0.15444	0	0	-5e-05	-3e-05	0.02371	1e-05	-0.01394	0.320035	2	Cu2-H20-C20-N4-O8	0	2	notequal_bothsteps	equal	0	Success at all eik	This sg doesnt have any
1274	LEXNOT_FSR	-0.01141	0.00258	-0.00325	-0.07924	-0.00619	0.14091	0.0378	-0.07809	-0.00593	-0.00245	-0.04921	0.00562	0.02167	0.02037	0.0202	0.03096	0.00213	-0.05602	0.175587	2	C25-Cu2-H23-N15-O2	0	2	notequal_bothsteps	equal	0	Failed at e35	This sg doesnt have any
1275	IGUBIX_FSR	0.02993	-0.01762	0.05772	0	0.09972	0	-1e-05	-2e-05	-1e-05	-0.09175	-1e-05	-0.07207	0.06383	-0.02913	0.16062	0	0.01979	0	0.196969	m	Cu2-H16-C26-Br6-N4-O2	0	0	equal_bothsteps	equal	0	Success at all eik	This sg doesnt have any
1276	YEJBAQ_FSR	0.00166	-0.02817	-0.07714	0	0.0738	0	-0.00021	-0.00012	-0.00011	0.1065	7e-05	0.0049	-0.12476	0.06422	0.00612	0	0.02883	0	0.143434	m	C26-Cu2-H22-N2-O8	0	2	notequal_bothsteps	equal	0	Success at all eik	This sg doesnt have any
1277	IPEPIC_FSR	-0.00201	-0.19357	0.03366	0	0.01982	0	-6e-05	0.00059	0.0002	0.09528	6e-05	-0.05352	0.05509	0.15084	-0.05613	0	0.1938	0	0.288731	m	C24-Cl2-Cu2-H16-N10-O8	0	2	notequal_bothsteps	equal	0	Success at all eik	This sg doesnt have any
1278	HAQFAI_FSR	-0.1866	0.02852	0.01129	0	0.04799	0	4e-05	-7e-05	-4e-05	-0.03442	0	0.07936	-0.02723	0.11057	0.33439	0	-0.18107	0	0.397067	m	C18-Cu2-H20-N6-O8-S2	0	0	equal_bothsteps	equal	0	Success at all eik	This sg doesnt have any
1279	WAWRES01_FSR	0.01016	0.00607	0.00973	-0.09302	-0.0003	0.04081	0.06125	0.17374	-0.06122	0.00068	-0.03261	-0.00103	-0.01182	-0.00992	-0.00964	0.03119	0.0016	0.01941	0.197209	2	C14-Cu2-H24-N4-O6	0	2	notequal_bothsteps	equal	0	Failed at e35	This sg doesnt have any
1280	KEQTEF_FSR	-1e-05	0	-1e-05	0	-0.1558	0	0	1e-05	0	-0.07391	0	0	-0.18805	-0.07415	-0.15311	0	0	0	0.253582	mm2	Cu2-H16-C16-O12	2	2	equal_bothsteps	equal	2	Success at all eik	This sg doesnt have any
1281	SAWVER_FSR	-1e-05	0	-1e-05	-0.0198	0	0.01661	-0.03835	-0.23761	-0.03154	0	-0.04625	0	-1e-05	-1e-05	-3e-05	0.00234	0	-0.01496	0.247109	2	Cu2-H14-C14-Br2-N2	0	0	equal_bothsteps	equal	0	Success at all eik	This sg doesnt have any
1282	SAFKER_FSR	-0.04677	-0.00339	0.01102	0	0.02861	0	3e-05	-3e-05	-2e-05	0.00115	1e-05	0.00836	-0.00448	0.00575	0.04588	0	-0.02912	0	0.0567906	m	Cu2-H30-C26-N6-O10	0	2	notequal_bothsteps	equal	0	Success at all eik	This sg doesnt have any
1283	ISUJEL_FSR	0	0	0	-0.01596	0	-0.03966	0.10886	0.38608	0.14454	0	0.01695	0	0	0	0	0.09138	0	-0.03965	0.426717	2	Cu2-H8-C10-S2-N6	0	0	equal_bothsteps	equal	0	Success at all eik	This sg doesnt have any
1284	DORWEO_FSR	4e-05	1e-05	1e-05	-0.01024	-1e-05	-0.0054	0.00352	0.0081	0.05893	0	-0.01517	0	6e-05	4e-05	0	0.00123	-2e-05	-0.01654	0.0614888	2	Cu2-H40-C32-Br4-N16	0	2	notequal_bothsteps	equal	0	Success at all eik	This sg doesnt have any
1285	MANZIL_FSR	0.00055	-0.0055	0.00986	0.00346	0.0145	-0.00349	0.00458	-0.00058	0.01057	0.00314	0.00887	-0.00577	-0.00221	-0.0067	0.00637	0.00359	0.02099	-0.00313	0.0327885	1	Cu2-H20-C18-N2-O8	0	0	equal_bothsteps	equal	0	This sg doesnt have any	This sg doesnt have any
1286	SANBUF01_FSR	-0.04689	-0.0494	-0.04814	0.00535	0.5505	-0.00303	0.01051	0.01096	0.00957	0.01925	0.00463	-0.00029	-0.06825	-0.41751	-0.0758	0.00085	-0.00244	0.00736	0.561489	mm2	C12-Cu2-H20-N4-O10	2	2	equal_bothsteps	equal	2	Failed at e36	This sg doesnt have any
1287	BARPAO_FSR	0.00579	0.03885	-0.02702	0	0.01664	0	1e-05	3e-05	1e-05	-0.05998	0	0.02434	0.03195	-0.06142	0.02485	0	-0.02207	0	0.0887164	m	C22-Cl2-Cu2-H28-N10-O2	0	2	notequal_bothsteps	equal	0	Success at all eik	This sg doesnt have any
1288	FUQKEI_FSR	-0.0075	-0.00576	-0.00745	0.00413	-0.01007	-0.00108	-0.0073	-0.00077	-0.00266	0.23871	0.00701	0.00057	-0.11311	-0.05526	0.01573	-0.00164	-4e-05	0.00033	0.238988	mm2	C24-Cu2-H20-N20-O2	0	2	notequal_bothsteps	equal	0	Success at all eik	This sg doesnt have any
1289	WIJDID_FSR	0	1e-05	-6e-05	0	0.42279	0	-3e-05	-1e-05	-0.00033	0.0865	0	0	0.31639	0.08892	-0.45216	0	0	0	0.55898	mm2	Cu12-H24-C12-N24-Cl12	0	0	equal_bothsteps	equal	0	Success at all eik	This sg doesnt have any
1290	FAKQEN02_FSR	-0.22954	0.07033	-0.00313	0	0.03985	0	-0.00084	0.0002	0.00025	-0.02057	3e-05	-0.02048	0.14616	-0.09879	-0.04056	0	-0.08424	0	0.307142	m	C20-Cu2-H28-N4-O14-S2	0	2	notequal_bothsteps	equal	0	Success at all eik	This sg doesnt have any
1291	GOKDIT_FSR	0.06735	-0.0923	-0.11639	0	-0.00253	0	-6e-05	-1e-05	-2e-05	-0.05026	-1e-05	-0.06177	-0.0627	-0.04184	-0.09101	0	-0.01982	0	0.180142	m	Cu2-H16-C24-Br2-N6-O4	0	2	notequal_bothsteps	equal	0	Success at all eik	This sg doesnt have any
1292	GOSFUP_FSR	-6e-05	-2e-05	-2e-05	0	0.06564	0	-0.00026	-0.00022	-6e-05	0.0336	0	0	0.05399	0.07125	0.19375	0	0	0	0.213379	mm2	Cu12-H40-C56-N16-Cl12	0	0	equal_bothsteps	equal	0	Success at all eik	This sg doesnt have any
1293	BIVPUU_FSR	0	-5e-05	-1e-05	0.11618	-0.00028	0.0728	0.07153	0.1202	-0.03852	0	0.11887	0	-0.00019	-2e-05	-0.00026	-0.04567	0.00011	0.12742	0.187559	2	Cu2-H20-C24-N20	0	2	notequal_bothsteps	equal	0	Success at all eik	This sg doesnt have any
1294	PEGTUS02_FSR	-0.10535	-0.19249	0.00056	0.02862	0.00944	0.02926	0.04507	0.10871	-0.0496	0.00757	-0.012	-0.05027	-0.0238	-0.03685	-0.02923	-0.00973	-0.02406	0.00736	0.259211	1	Cu2-P6-H38-C28-N2-O20	2	2	equal_bothsteps	equal	2	This sg doesnt have any	This sg doesnt have any
1295	IPUXIB_FSR	1e-05	2e-05	-2e-05	-0.07963	0	-0.00821	0.07974	0.1164	-0.03942	0	-0.06309	0	2e-05	0	-2e-05	0.01259	0	-0.04167	0.159505	2	Cu2-H32-C24-N12-O14	0	2	notequal_bothsteps	equal	0	Success at all eik	This sg doesnt have any
1296	CUICOL10_FSR	0	0	0	0	0.01985	0	-3e-05	1e-05	3e-05	-0.14668	0	0	-0.02918	-0.089	-0.07465	0	0	0	0.14668	mm2	Cu2-H22-C16-I2-N2	0	0	equal_bothsteps	equal	0	Success at all eik	This sg doesnt have any
1297	NAMCOU_FSR	0	0	0	0.01706	0	0.03179	-0.11814	0.03746	0.06613	0	-0.08649	0	0	1e-05	0	0.00964	0	-0.05982	0.164967	2	Cu2-H18-C10-S2-N2-O10	0	2	notequal_bothsteps	equal	0	Success at all eik	This sg doesnt have any
1298	KABTEO_FSR	7e-05	0.00022	0.00034	-0.00786	0.00016	0.17248	-0.00711	-0.13833	-0.28971	0	0.01966	0	0.00051	0.00018	-0.00047	-0.00408	-0.00013	0.03314	0.321721	2	Cu2-H26-C22-N4-O12	0	0	equal_bothsteps	equal	0	Success at all eik	This sg doesnt have any
1299	ROBNIG_FSR	-0.0001	-3e-05	-3e-05	-0.0215	-1e-05	0.03799	-0.05493	-0.08257	0.02672	0	-0.00744	0	0	1e-05	-1e-05	0.03404	0	0.01431	0.102978	2	Cu2-H44-C34-Br2-N2-O6	0	2	notequal_bothsteps	equal	0	Success at all eik	This sg doesnt have any
1300	IXIHUS01_FSR	3e-05	2e-05	3e-05	-0.04759	0	0	0	3e-05	0	0	-0.04758	0	-2e-05	-2e-05	-2e-05	0	0	-0.07023	0.07023	-42m	Co2-Cu4-H24-C24-N16	0	6	notequal_bothsteps	equal	0	Success at all eik	Success at all eik
1301	SOKDIH_FSR	2e-05	5e-05	3e-05	0.00321	-1e-05	-0.04253	-5e-05	0.18375	0.06592	0	0.0634	0	-1e-05	-0.0002	-0.00022	0.06799	-5e-05	0.12646	0.205254	2	Cu2-H22-C16-S2-N6-O12	0	0	equal_bothsteps	equal	0	Success at all eik	This sg doesnt have any
1302	PHALCV_FSR	4e-05	-4e-05	0	0.03105	-1e-05	0.0579	0.09945	-0.01913	-0.04825	0	0.07616	0	9e-05	-6e-05	0	0.05768	-0.0001	0.03698	0.13559	2	Cu2-H16-C16-O12	0	2	notequal_bothsteps	equal	0	Success at all eik	This sg doesnt have any
1303	KASRUS_FSR	0.0004	-9e-05	-0.00029	-0.02052	-0.00016	0.13812	0.04595	0.04243	-0.06194	0	0.01412	0	-0.00602	-0.00478	0.00232	-0.00989	0.00228	-0.04146	0.14523	2	Cu2-H12-C12-N8-Cl4	0	0	equal_bothsteps	equal	0	Failed at e35	This sg doesnt have any
1304	CUHBIQ01_FSR	-1e-05	-1e-05	-3e-05	0.02947	0	-0.00276	-0.03776	-0.1012	-0.01747	0	-0.00139	0	2e-05	1e-05	-2e-05	0.02332	1e-05	-0.01014	0.109428	2	Cu2-H28-C26-S2-N6	0	0	equal_bothsteps	equal	0	Success at all eik	This sg doesnt have any
1305	CUHMAM01_FSR	1e-05	-1e-05	0	-0.05743	0	-0.05706	-0.12776	0.01935	0.09293	0	0.02969	0	-1e-05	1e-05	1e-05	-0.01584	0	-0.00886	0.161909	2	Cu2-H20-C16-O20	2	2	equal_bothsteps	equal	2	Success at all eik	This sg doesnt have any
1306	YIHWAO_FSR	1e-05	0.0006	-0.00063	0.00332	-0.00039	-0.00022	-0.08937	-0.09235	-0.06062	0	-0.02048	0	-0.00018	-0.00038	4e-05	-0.04416	-0.00018	0.00262	0.143561	2	C16-Cu2-H16-N2-O10	0	0	equal_bothsteps	equal	0	Success at all eik	This sg doesnt have any
1307	DORVUD01_FSR	1e-05	1e-05	0	-0.01247	-1e-05	-0.00473	-0.02253	-0.01809	0.01416	0	-0.01594	0	2e-05	1e-05	-1e-05	-0.00306	0	-0.02312	0.0359088	2	Cu2-H40-C32-N16-Cl4	0	2	notequal_bothsteps	equal	0	Success at all eik	This sg doesnt have any
1308	REDWII_FSR	-1e-05	-2e-05	0	0.04706	0	-0.07978	0.01003	-0.06371	0.13403	0	0.10288	0	-1e-05	-1e-05	-1e-05	0.08473	0	0.08958	0.180853	2	Cu2-H24-C16-S2-N4-O10	2	2	equal_bothsteps	equal	2	Success at all eik	This sg doesnt have any
1309	YOLBEI_FSR	0.06253	0.03129	-0.02903	0.03978	-0.00061	-0.01994	-0.0604	-0.02363	-0.02871	0.01904	0.01286	-0.00648	-0.0135	0.05261	0.05178	0.00331	0.008	-0.00415	0.0987211	1	Cu2-H24-C28-N2-Cl2-O8	0	0	equal_bothsteps	equal	0	This sg doesnt have any	This sg doesnt have any
1310	WUWVIU_FSR	1e-05	0	0	-0.0023	1e-05	0.02956	-0.05514	0.01493	0.04957	0	-0.00813	0	0	0	0	0.05318	0	0.02224	0.0760697	2	Cu2-H28-C24-N8-O8	0	2	notequal_bothsteps	equal	0	Success at all eik	This sg doesnt have any
1311	IMZCUC01_FSR	0	0	1e-05	0	0.01866	0	3e-05	2e-05	1e-05	-0.11785	0	0	0.06333	0.0047	0.13971	0	0	0	0.153466	mm2	Cu2-H22-C18-N12-Cl2	2	2	equal_bothsteps	equal	2	Success at all eik	This sg doesnt have any
1312	IYOYUR_FSR	0.00034	-0.00061	0.00119	-0.05297	0	0	0.00086	0.00142	-5e-05	0	-0.00872	0	-0.00013	0	-0.0001	0	0	-0.04219	0.052988	222	C28-Cu2-H12-N14	0	0	equal_bothsteps	equal	0	Success at all eik	This sg doesnt have any
1313	URACEW_FSR	0.05281	-0.05292	4e-05	-0.0267	-0.00832	0.01216	0.01245	-0.01251	-0.00027	-0.00783	0.02651	-0.05263	0.05875	0.05875	-0.05116	0	0	0	0.0975731	3	Cu3-H33-C39-N6-O6	0	0	equal_bothsteps	equal	0	Success at all eik	Success at all eik
1314	LIXROZ_FSR	1e-05	0	1e-05	0	0.00405	0	0	-1e-05	0	0.02799	0	0	-0.02735	0.0092	0.10007	0	0	0	0.104147	mm2	Cu4-H16-C24-S20-I4-O4	0	0	equal_bothsteps	equal	0	Success at all eik	This sg doesnt have any
1315	VIJGUS_FSR	6e-05	0.00013	0.00017	-0.1019	0	0	-1e-05	-1e-05	1e-05	0	-0.06384	0	0	0	4e-05	0	0	-0.10642	0.10642	222	Cu4-H16-C16-O24	4	4	equal_bothsteps	equal	4	Success at all eik	This sg doesnt have any
1316	GABHOH_FSR	0	-0.00019	1e-05	-0.02495	0	0	-1e-05	-1e-05	0	0	0.00777	0	-2e-05	-3e-05	-3e-05	0	0	-0.0303	0.0303	222	Cu4-H12-C16-I8-N8	0	0	equal_bothsteps	equal	0	Success at all eik	This sg doesnt have any
1317	SAFGEN_FSR	0	0	-1e-05	-0.01684	0	0	0	0	1e-05	0	0.06641	0	1e-05	0	0	0	0	0.04265	0.06641	222	K6-Cu2-P2-H32-C20-N4-O24	2	2	equal_bothsteps	equal	2	Success at all eik	This sg doesnt have any
1318	OFIYUY_FSR	-0.02342	0.24415	0.00398	0	0.17372	0	-4e-05	-1e-05	-2e-05	-0.11666	2e-05	0.02391	0.17761	-0.18369	0.04406	0	-0.0444	0	0.370543	m	Cu4-H8-C10-S2-N2-Cl2	0	0	equal_bothsteps	equal	0	Success at all eik	This sg doesnt have any
1319	XANBUL_FSR	-1e-05	-1e-05	-2e-05	0	-0.01893	0	2e-05	1e-05	2e-05	-0.02664	0	0	-0.04978	-0.02152	-0.01105	0	0	0	0.0553467	mm2	C24-Cu4-H20-N8	0	0	equal_bothsteps	equal	0	Success at all eik	This sg doesnt have any
1320	PIFDOY_FSR	7e-05	-3e-05	-7e-05	-0.02883	0	0	1e-05	2e-05	-1e-05	0	-0.00826	0	-3e-05	3e-05	-2e-05	0	0	0.01372	0.0288302	222	Cu4-H56-C24-N8-Cl8	4	4	equal_bothsteps	equal	4	Success at all eik	This sg doesnt have any
1321	GAJBEB_FSR	-4e-05	-6e-05	-8e-05	-0.00026	-3e-05	0.01669	0.05476	-0.01132	-0.0842	0	-0.08735	0	-0.00014	-0.00015	-0.00032	-0.0517	-0.00012	-0.03873	0.133591	2	Cu4-H20-C26-I4-N8	0	0	equal_bothsteps	equal	0	Success at all eik	This sg doesnt have any
1322	ASUQIO03_FSR	0.00021	-0.00014	0	0.09629	0	0	0.00017	-0.00017	3e-05	0	0.09602	0	0	0	1e-05	0	0	0.06203	0.0962903	-42m	C16-Cu4-H24-N12	0	0	equal_bothsteps	equal	0	Success at all eik	Success at all eik
1323	WEGLAX_FSR	-0.00034	-0.00051	-0.0003	0	0.00968	0	0.00155	-0.00053	0.00121	-0.14088	0	0	0.01995	-0.12779	-0.01703	0	0	0	0.140902	mm2	C28-Cu4-H16-N12-O4-S4	0	0	equal_bothsteps	equal	0	Success at all eik	This sg doesnt have any
1324	SAWWOC_FSR	9e-05	9e-05	0.00012	0	0.09457	0	-0.00022	-0.00034	-0.00054	0.13721	0	0	0.08847	0.19231	0.20533	0	0	0	0.294909	mm2	Cu4-H36-C28-Br4-N4	0	0	equal_bothsteps	equal	0	Success at all eik	This sg doesnt have any
1325	FAPFUX_FSR	1e-05	0	0	0.00829	0	-0.12118	0.01535	0.07041	0.03393	0	-0.02482	0	-1e-05	-1e-05	-2e-05	-0.00013	0	0.02569	0.12414	2	Cu2-H54-C44-N2-Cl4-O4	0	2	notequal_bothsteps	equal	0	Success at all eik	This sg doesnt have any
1326	LESZEP_FSR	-0.09904	-0.06467	0.0038	0	-0.05353	0	0	3e-05	1e-05	-0.07411	1e-05	-0.01407	0.03398	-0.02806	0.05041	0	0.0715	0	0.139887	m	Cu4-H18-C28-S2-N10	0	0	equal_bothsteps	equal	0	Success at all eik	This sg doesnt have any
1327	HOSPEL_FSR	0.1566	0.09648	-0.131	0	-0.12987	0	0.00093	0.00021	0.00011	-0.0398	-1e-05	0.09807	-0.29396	-0.06128	0.15107	0	0.03905	0	0.414077	m	C12-Cl2-Cu4-H8-N10	0	0	equal_bothsteps	equal	0	Success at all eik	This sg doesnt have any
1328	RIGROR_FSR	0.10888	0.23968	0.23942	0.00637	0.02955	-0.02973	-0.06166	-0.03086	-0.0122	0.0079	0.03332	-0.044	-0.0301	0.04984	0.00919	-0.02797	0.02509	-0.00114	0.362208	1	Cu2-H38-C34-N18	0	0	equal_bothsteps	equal	0	This sg doesnt have any	This sg doesnt have any
1329	INUNUB_FSR	-0.01261	0.04282	-0.01945	0	0.00843	0	-2e-05	-1e-05	-1e-05	0.05417	1e-05	-0.01183	-0.04326	0.04222	-0.03753	0	0.03005	0	0.0893135	m	C40-Cu2-H32-N12-O8	0	2	notequal_bothsteps	equal	0	Success at all eik	This sg doesnt have any
1330	MUSDUA_FSR	-0.09825	0.098	0.00686	0	0.07966	0	3e-05	0	0	0.03437	0	0.01522	0.11207	0.05245	0.01466	0	-0.04987	0	0.17971	m	C48-Cu2-H40-N4-O18	2	2	equal_bothsteps	equal	2	Success at all eik	This sg doesnt have any
1331	AQIGUD_FSR	1e-05	1e-05	1e-05	-0.05788	0	-0.0091	-0.01813	-0.03685	-0.0014	0	-0.00651	0	1e-05	3e-05	1e-05	0.02955	0	0.02427	0.0679384	2	Cu2-H20-C36-I6-N6-O8	0	2	notequal_bothsteps	equal	0	Success at all eik	This sg doesnt have any
1332	MEHPAQ_FSR	9e-05	-0.0001	-5e-05	-0.43264	0	0	-1e-05	-3e-05	-1e-05	0	-0.12507	0	-1e-05	-1e-05	-1e-05	0	0	-0.03332	0.43264	222	Cu4-H36-C20-N4-O20	4	4	equal_bothsteps	equal	4	Success at all eik	This sg doesnt have any
1333	PEALCU10_FSR	1e-05	0	1e-05	0.0101	1e-05	-0.01252	-0.00766	-0.05583	-0.04176	0	-0.00626	0	1e-05	-1e-05	-1e-05	-0.00783	0	-0.00344	0.0704184	2	Cu2-H40-C36-N4-O8	2	2	equal_bothsteps	equal	2	Success at all eik	This sg doesnt have any
1334	ITOZEY_FSR	2e-05	-1e-05	0	-0.03907	1e-05	-0.07893	-0.13703	-0.00673	-0.2059	0	-0.04917	0	0	-1e-05	2e-05	-0.02339	0	-0.01355	0.25226	2	Cu2-P2-H30-C34-N4-O12	2	2	equal_bothsteps	equal	2	Success at all eik	This sg doesnt have any
1335	SACSEV_FSR	0	0	0	0	0.04546	0	0	1e-05	1e-05	-0.30974	0	0	0.1295	-0.26647	-0.23249	0	0	0	0.376601	mm2	Cu2-H8-C8-N4-Cl2	0	0	equal_bothsteps	equal	0	Success at all eik	This sg doesnt have any
1336	XEBNEX_FSR	0.00029	6e-05	0.00025	0.00774	0	0	0	0	0	0	0.12122	0	-2e-05	0	-2e-05	0	0	0.0597	0.12122	222	Cu4-H40-C20-I4-N8	0	0	equal_bothsteps	equal	0	Success at all eik	This sg doesnt have any
1337	MOJFIA_FSR	1e-05	0	-1e-05	0.01113	0	0	0	0	0	0	0.01756	0	0	-1e-05	-2e-05	0	0	0.01603	0.01756	222	Cu4-H48-C28-S8-N16	0	4	notequal_bothsteps	equal	0	Success at all eik	This sg doesnt have any
1338	ODOBAL_FSR	0.21975	-0.01961	-0.00554	0	0.06036	0	3e-05	2e-05	-3e-05	-0.05646	2e-05	0.0911	0.00531	-0.05302	-0.01218	0	-0.0419	0	0.228801	m	Cu2-H24-C32-N4-O8	0	2	notequal_bothsteps	equal	0	Success at all eik	This sg doesnt have any
1339	HEFNUD_FSR	-0.11802	-0.18393	-0.09444	0	0.0405	0	0	0	0	0.02366	0	-0.12878	-0.08072	-0.03958	-0.10607	0	-0.05326	0	0.266127	m	C44-Cu2-H40-N8-O14	2	2	equal_bothsteps	equal	2	Success at all eik	This sg doesnt have any
1340	SEJTIL_FSR	-0.01394	0.03017	-0.05266	-0.0012	-0.03811	0.0008	0.00702	0.00548	0.00485	0.00198	-0.0003	-0.00688	-0.05771	0.04202	-0.15761	0.00132	-0.00107	0.00199	0.183808	m	C38-Cu2-H44-O14	2	2	equal_bothsteps	notequal	0	Failed at e36	This sg doesnt have any
1341	EPOZIU_FSR	-0.00031	-0.00053	-0.00047	0.06768	0	0	-1e-05	0	-1e-05	0	0.07215	0	0	-1e-05	0	0	0	0.03817	0.07215	222	Cu4-H40-C24-N8-O16	0	4	notequal_bothsteps	equal	0	Success at all eik	This sg doesnt have any
1342	FARVAW_FSR	0.00211	0.00023	-0.00051	0.00071	-0.0011	0.00125	0.00104	0.00137	-0.00222	0.00117	8e-05	0.00017	0.01568	0.01607	0.01977	-0.00123	0.0017	0.00051	0.0300058	1	Cu2-H40-C36-N8-O8	0	0	equal_bothsteps	equal	0	This sg doesnt have any	This sg doesnt have any
1343	NEBVIC_FSR	2e-05	0.00018	-7e-05	0.0861	0	0	0	0	1e-05	0	0.06172	0	0	0	0	0	0	0.19805	0.19805	222	Cu4-H24-C20-Br4-N8	0	0	equal_bothsteps	equal	0	Success at all eik	This sg doesnt have any
1344	FODLEQ03_FSR	0.01838	-0.01882	-0.0002	-0.02176	-0.03235	-0.01596	-0.01623	0.01559	-0.00034	-0.03238	0.02171	-0.01862	0.09052	0.09052	0.07659	0	0	0	0.149179	3	Cu3-H24-C39-N9	0	0	equal_bothsteps	equal	0	Success at all eik	Success at all eik
1345	ALIFOR01_FSR	2e-05	-2e-05	-3e-05	-0.0167	-1e-05	0.06477	0.06185	-0.08824	-0.07474	0	-0.0632	0	0	0	1e-05	-0.02748	0	0.02624	0.145575	2	Cu4-H40-C24-N4-Cl4-O2	0	0	equal_bothsteps	equal	0	Success at all eik	This sg doesnt have any
1346	PONHEG_FSR	0	0	0	-0.00018	0	-0.00494	-0.09938	-0.10551	-0.11032	0	0.06303	0	0	0	0	0.00257	0	0.02306	0.192749	2	Cu2-Hg4-H56-C24-N16-Cl12-O8	2	2	equal_bothsteps	equal	2	Success at all eik	This sg doesnt have any
1347	HOYMUD02_FSR	-1e-05	-2e-05	-5e-05	0	0.02956	0	-0.00069	0.00099	-0.00069	-0.04337	0	0	0.1034	0.03596	0.21828	0	0	0	0.244196	mm2	C12-Cu4-H8-N8-S4	0	0	equal_bothsteps	equal	0	Success at all eik	This sg doesnt have any
1348	ODOFOC_FSR	0.00032	0.00028	0.0003	-0.00415	0	0	-1e-05	-3e-05	-2e-05	0	-0.02723	0	1e-05	2e-05	2e-05	0	0	-0.00912	0.02723	222	Cu4-H12-C16-I4-N8-Cl4	0	0	equal_bothsteps	equal	0	Success at all eik	This sg doesnt have any
1349	VUQJEX_FSR	-0.12909	-0.11665	0.078	0	0.11422	0	-0.00051	-0.00011	2e-05	0.0614	9e-05	-0.10811	0.20135	0.00182	-0.15743	0	-0.0149	0	0.313793	m	Br2-C12-Cu4-H8-N10	0	0	equal_bothsteps	equal	0	Success at all eik	This sg doesnt have any
1350	HAXSUW_FSR	-2e-05	3e-05	-2e-05	0.30586	0	0	8e-05	-0.00012	4e-05	0	-0.30599	0	0	0	-2e-05	0	0	0	0.30599	422	Cu4-H40-C24-N16-O32	0	4	notequal_bothsteps	equal	0	Success at all eik	Success at all eik
1351	KAYPEF_FSR	3e-05	0	-1e-05	0	0.1274	0	-4e-05	-0.00011	-0.00011	-0.1141	0	0	0.06973	-0.0052	-0.05208	0	0	0	0.1274	mm2	Cu4-H40-C24-N12-Cl4-O8	4	4	equal_bothsteps	equal	4	Success at all eik	This sg doesnt have any
1352	FOWZIC_FSR	-0.0172	-0.01409	-0.02525	0	-0.0031	0	-2e-05	6e-05	0	0.00157	-2e-05	0.00148	-0.00791	0.0013	0.00478	0	-0.00087	0	0.0337867	m	Cu4-H48-C52-S8-Br4	0	0	equal_bothsteps	equal	0	Success at all eik	This sg doesnt have any
1353	LEFJAH01_FSR	0	0	-5e-05	-0.07293	-2e-05	0.01392	-0.15934	-0.20356	0.20976	0	-0.01883	0	0	-0.00012	-9e-05	-0.03245	3e-05	0.053	0.333436	2	C8-Cu2-H18-N2-O12	0	2	notequal_bothsteps	equal	0	Success at all eik	This sg doesnt have any
1354	JABYUH01_FSR	-1e-05	0	0	0.0114	0	0	1e-05	1e-05	1e-05	0	-0.06572	0	1e-05	1e-05	1e-05	0	0	-0.00577	0.06572	222	Cu4-H48-C28-N8-O12	4	4	equal_bothsteps	equal	4	Success at all eik	This sg doesnt have any
1355	MEKJEU_FSR	-1e-05	0	-3e-05	-0.00817	2e-05	-0.129	-0.02344	-0.07698	-0.01118	0	-0.00276	0	0	-1e-05	-6e-05	-0.0122	1e-05	-0.02345	0.131514	2	Cu2-H32-C32-N4-O8	0	2	notequal_bothsteps	equal	0	Success at all eik	This sg doesnt have any
1356	IRORUD_FSR	-2e-05	-2e-05	0	0.04198	0	0.06195	0.02638	-0.03164	0.00484	0	0.01864	0	1e-05	0	1e-05	-0.01718	0	0.02054	0.0752435	2	Cu2-H44-C48-N4-O14	2	2	equal_bothsteps	equal	2	Success at all eik	This sg doesnt have any
1357	VILKUX_FSR	0.00013	4e-05	0.00012	0	0.10079	0	7e-05	-0.00015	-0.00014	-0.06604	0	0	0.01852	-0.02443	-0.00102	0	0	0	0.10079	mm2	C40-Cl4-Cu2-H32-N8-O16-S8	2	2	equal_bothsteps	equal	2	Success at all eik	This sg doesnt have any
1358	KIYCIH_FSR	-0.00049	0.00014	0.00028	0.01662	0	0	1e-05	1e-05	-1e-05	0	0.04203	0	-2e-05	-1e-05	5e-05	0	0	0.06911	0.06911	222	Cu4-H12-C24-N16-O8-F4	0	4	notequal_bothsteps	equal	0	Success at all eik	This sg doesnt have any
1359	ARUTEO_FSR	4e-05	0.00016	0.00022	0.03307	0	0	0	1e-05	1e-05	0	-0.00754	0	-2e-05	-1e-05	1e-05	0	0	0.01726	0.0330711	222	Cu2-H24-C36-N4-O12-F8	0	2	notequal_bothsteps	equal	0	Success at all eik	This sg doesnt have any
1360	DOPKOK_FSR	2e-05	2e-05	-1e-05	0.015	2e-05	0.02475	-0.01371	0.11281	-0.01905	0	0.0184	0	1e-05	0	0	-0.01634	0	0.00967	0.116686	2	Cu2-H28-C32-N20-O10	2	2	equal_bothsteps	equal	2	Success at all eik	This sg doesnt have any
1361	MARFUH_FSR	5e-05	2e-05	6e-05	0.03022	0	0	-1e-05	-2e-05	-3e-05	0	-0.01092	0	-3e-05	0.00012	-3e-05	0	0	0.0333	0.0333002	222	Cu4-H24-C28-S12-I4-O16	0	0	equal_bothsteps	equal	0	Success at all eik	This sg doesnt have any
1362	LADKAF_FSR	4e-05	0	3e-05	-0.02901	-1e-05	0.01498	0.21096	0.01915	0.00769	0	-0.06809	0	-1e-05	-1e-05	-3e-05	-0.01416	1e-05	-0.05165	0.222635	2	Cu2-H32-C46-N4-O20	0	2	notequal_bothsteps	equal	0	Success at all eik	This sg doesnt have any
1363	XIPCEF01_FSR	-0.00032	0.00056	0.0004	0.09703	0	0	-1e-05	-2e-05	1e-05	0	0.07897	0	0	0	-4e-05	0	0	0.11143	0.11143	222	Cu4-H16-C24-N16-O8	0	4	notequal_bothsteps	equal	0	Success at all eik	This sg doesnt have any
1364	SENTIQ_FSR	-9e-05	-0.00031	-0.00014	0.06096	0	0	-1e-05	1e-05	-1e-05	0	0.10977	0	0	-1e-05	1e-05	0	0	0.04274	0.10977	222	Cu4-H28-C20-S4-N4-O20	0	4	notequal_bothsteps	equal	0	Success at all eik	This sg doesnt have any
1365	YOVZAL_FSR	-0.14434	-0.04747	0.08132	0	0.01098	0	4e-05	0	-7e-05	-0.03017	4e-05	0.07873	0.01665	0.028	-0.16988	0	0.06512	0	0.221274	m	Cu4-H20-C28-N12-O2	0	0	equal_bothsteps	equal	0	Success at all eik	This sg doesnt have any
1366	YIPQAS_FSR	-3e-05	-2e-05	-3e-05	0.05799	-2e-05	-0.01773	-0.03082	-0.03204	-0.0044	0	-0.01061	0	5e-05	2e-05	5e-05	0.00301	3e-05	0.01316	0.0606481	2	Cu4-H20-C28-S2-I4-N4-O2	0	0	equal_bothsteps	equal	0	Success at all eik	This sg doesnt have any
1367	MGPHCU_FSR	2e-05	-5e-05	3e-05	0.12765	0	0	3e-05	-1e-05	0	0	-0.07729	0	6e-05	6e-05	2e-05	0	0	0.02506	0.12765	222	Mg2-Cu2-H32-C32-O24	2	2	equal_bothsteps	equal	2	Success at all eik	This sg doesnt have any
1368	KIWTAM_FSR	3e-05	2e-05	1e-05	0	-0.03748	0	3e-05	7e-05	5e-05	-0.07189	0	0	-0.0081	-0.12675	-0.03209	0	0	0	0.131	mm2	Cu4-H20-C20-N16	0	0	equal_bothsteps	equal	0	Success at all eik	This sg doesnt have any
1369	TISLOX_FSR	-2e-05	-1e-05	4e-05	0	-0.06951	0	0	-2e-05	-3e-05	-0.06724	0	0	-0.08277	-0.11842	0.27843	0	0	0	0.313684	mm2	C12-Cu4-H8-N4-S4	0	0	equal_bothsteps	equal	0	Success at all eik	This sg doesnt have any
1370	AKAPUX_FSR	-1e-05	-2e-05	-0.00012	-0.01517	0	0	0	0	0	0	-0.00465	0	0	0	0	0	0	-0.01496	0.0151705	222	Cu4-H32-C24-N8-Cl4	0	0	equal_bothsteps	equal	0	Success at all eik	This sg doesnt have any
1371	KOZKUH_FSR	-1e-05	1e-05	2e-05	-0.03125	2e-05	-0.04455	-0.04548	0.00997	0.01312	0	0.1243	0	0	1e-05	-1e-05	-0.04369	0	-0.02478	0.133381	2	Cu2-H32-C34-N6-Cl2-O4	0	2	notequal_bothsteps	equal	0	Success at all eik	This sg doesnt have any
1372	DEGJUW_FSR	0.15705	0.09529	0.26537	0	0.04483	0	-0.00273	0.00022	-0.00273	0.1095	-0.0011	0.05447	0.1378	0.11862	0.32931	0	0.17267	0	0.520493	m	C12-Cu4-H10-I4-N10	0	0	equal_bothsteps	equal	0	Success at all eik	This sg doesnt have any
1373	SAWWAO_FSR	0	0	1e-05	0	0.06705	0	-0.00042	-0.00017	-0.0007	0.14666	0	0	-0.01431	0.09673	0.16609	0	0	0	0.192739	mm2	Cu4-H36-C40-Br4-N4	0	0	equal_bothsteps	equal	0	Success at all eik	This sg doesnt have any
1374	OFIZAF_FSR	0.02686	0.13081	-0.03462	0	0.16512	0	-1e-05	0	0	-0.10733	0	0.0138	0.21464	-0.24929	0.01269	0	-0.03093	0	0.350728	m	Cu4-H8-C10-S2-Br2-N2	0	0	equal_bothsteps	equal	0	Success at all eik	This sg doesnt have any
1375	LIYVOG_FSR	-0.00221	-0.00294	-0.00349	0	-0.06568	0	-1e-05	4e-05	0	0.07142	-1e-05	-0.00093	-0.02534	0.07503	0.05036	0	-0.00011	0	0.0939812	mm2	Cu4-H16-C28-N8-O28	0	4	notequal_bothsteps	equal	0	Success at all eik	This sg doesnt have any
1376	GLALCU10_FSR	-0.01218	0.0113	0.00673	-0.08606	-0.01072	0.02182	0.04657	-0.03111	-0.06008	0.0083	0.06072	0.02028	-0.68868	-0.75691	-0.64349	0.1468	0.03345	1.40538	1.86016	222	Cu4-H32-C20-N8-O12	2	0	notequal_bothsteps	notequal	0	Failed at e35	This sg doesnt have any
1377	LEBSUH02_FSR	-0.00703	-0.0067	-0.00587	-0.0117	0.00185	-0.02555	-0.02611	-0.17684	-0.01196	6e-05	-0.04038	-0.00014	-0.02016	-0.02107	-0.02031	-0.05071	0.00112	0.02488	0.185597	2	C32-Cu2-H28-O12	0	2	notequal_bothsteps	equal	0	Failed at e35	This sg doesnt have any
1378	DOZQUF_FSR	1e-05	-0.00016	-0.00013	-0.16596	0	0	0.0002	0.00087	0.0007	0	-0.10219	0	-0.00019	-5e-05	6e-05	0	0	-0.06732	0.16596	222	Cu4-H28-C12-S4-N4-O24	0	4	notequal_bothsteps	equal	0	Success at all eik	This sg doesnt have any
1379	KEPSEE_FSR	-0.00024	-6e-05	-3e-05	0.003	-4e-05	-0.0269	0.00925	-0.06495	-0.02729	0	-0.00246	0	0	-2e-05	3e-05	-0.04852	-2e-05	0.04017	0.0710976	2	Cu2-H36-C36-N4-O6	0	2	notequal_bothsteps	equal	0	Success at all eik	This sg doesnt have any
1380	CUGLTM01_FSR	0.03861	0.03435	0.03886	0.62395	-0.01006	0.0015	0.02456	0.02484	0.02777	-0.00309	0.15652	0.00232	-0.00417	-0.00152	-0.00277	-0.00026	3e-05	-0.0042	0.627375	222	Cu4-H36-C20-N4-O20	0	4	notequal_bothsteps	notequal	2	Success at all eik	This sg doesnt have any
1381	NUVBIR_FSR	1e-05	0	4e-05	0.00333	3e-05	-0.02298	-0.10357	0.00519	-0.07152	0	-0.01998	0	1e-05	1e-05	2e-05	-0.00682	2e-05	0.01008	0.127546	2	Cu2-H40-C48-N8-O12	2	2	equal_bothsteps	equal	2	Success at all eik	This sg doesnt have any
1382	BEHBIZ_FSR	0.00017	0.00027	0.0002	0	0.177	0	-0.00014	-0.00013	-0.00012	0.14478	0	0	0.09481	-0.04486	-0.06152	0	0	0	0.177	mm2	Cu4-H12-C24-N8-Cl4-O16	4	4	equal_bothsteps	equal	4	Success at all eik	This sg doesnt have any
1383	CAYDIR_FSR	0	0	2e-05	-0.0928	0.13335	-2e-05	-1e-05	-1e-05	9e-05	0.12801	0.09707	4e-05	-0.00537	-0.00517	0.07952	0	0	0.00362	0.164942	4	Cu4-H32-C24-N32-O4	0	0	equal_bothsteps	equal	0	Failed at e36	Success at all eik
1384	SAXXAQ_FSR	0.01435	-0.01408	-9e-05	0.02628	0.01136	0.00536	0.00534	-0.00525	0.00015	0.01134	-0.02617	-0.01416	-0.01013	-0.01013	0.00369	0	0	0	0.0357729	3	Cu3-P3-H45-C54-S9-Cl3	0	0	equal_bothsteps	equal	0	Success at all eik	Success at all eik
1385	GISHAS_FSR	1e-05	1e-05	2e-05	0	0.00246	0	-1e-05	-5e-05	-3e-05	0.00366	0	0	-0.00605	-0.00068	0.02421	0	0	0	0.0249638	mm2	Cu4-H56-C28-N8-O20	0	4	notequal_bothsteps	notequal	2	Success at all eik	This sg doesnt have any
1386	CETVAA_FSR	0.00555	0.04307	0.17404	0	-0.05519	0	-1e-05	-2e-05	-2e-05	0.01212	1e-05	0.00357	-0.05005	0.13068	0.0776	0	0.05054	0	0.219409	m	C66-Cl4-Cu2-H48-N8	0	2	notequal_bothsteps	equal	0	Success at all eik	This sg doesnt have any
1387	GIWKON_FSR	-7e-05	-5e-05	-4e-05	0.01802	-0.00016	-0.08595	0.24145	4e-05	0.31304	0	-0.16054	0	-4e-05	2e-05	-3e-05	0.04298	7e-05	0.05846	0.426691	2	Cu4-H14-C18-S4-N14	0	0	equal_bothsteps	equal	0	Success at all eik	This sg doesnt have any
1388	DUXZEC_FSR	0.10658	0.04316	-0.01017	-0.00153	-0.03352	-0.05051	-0.03248	-0.05182	-0.00723	0.00939	-0.0193	0.02759	0.06187	0.02059	0.08584	-0.02741	-0.0385	-0.04912	0.171844	1	Cu3-H10-C16-S3-N7	0	0	equal_bothsteps	equal	0	This sg doesnt have any	This sg doesnt have any
1389	HODXIH_FSR	-5e-05	-0.00015	-0.00022	-0.08417	0	0	-0.00015	-6e-05	-0.00022	0	0.0842	0	0	0	-1e-05	0	0	0	0.0842004	422	Cu4-H16-C20-O16	0	4	notequal_bothsteps	notequal	2	Success at all eik	Success at all eik
1390	QUCVIU_FSR	-0.00049	7e-05	0.00037	-0.03354	-0.0001	-0.06724	-0.00033	0.06953	0.03406	0	-0.01411	0	0.0002	-0.0001	-0.00031	0.0452	0.00011	-0.00125	0.0787655	2	Cu4-H18-C28-S4-N10	0	0	equal_bothsteps	equal	0	Success at all eik	This sg doesnt have any
1391	CYPYCU10_FSR	-3e-05	-0.0001	-2e-05	-0.02768	0	0	0	0	0	0	-0.03082	0	1e-05	1e-05	2e-05	0	0	0.01692	0.03082	222	Cu4-H16-C28-N12	0	0	equal_bothsteps	equal	0	Success at all eik	This sg doesnt have any
1392	IPINAY_FSR	3e-05	8e-05	1e-05	0	-0.13886	0	0.00141	-0.00043	0.00039	0.0949	0	0	-0.08868	0.05969	0.14825	0	0	0	0.182772	mm2	C24-Cu4-H16-N4-O8	0	0	equal_bothsteps	equal	0	Success at all eik	This sg doesnt have any
1393	NORYAW_FSR	1e-05	1e-05	-1e-05	0	-0.03455	0	0.00011	0.00199	0.00144	0.02692	0	0	-0.0166	-0.1769	0.01722	0	0	0	0.178519	mm2	C24-Cu4-H32-N16	0	0	equal_bothsteps	equal	0	Success at all eik	This sg doesnt have any
1394	HEJCOR_FSR	0.185	0.20395	0.20752	0	0.0005	0	-1e-05	-3e-05	1e-05	0.03986	1e-05	-0.03857	0.04757	-0.02989	0.08021	0	0.00474	0	0.349587	m	C56-Cu2-H40-N4-O8	2	2	equal_bothsteps	equal	2	Success at all eik	This sg doesnt have any
1395	EDAWUE_FSR	-1e-05	-1e-05	0	0.06593	0	0	1e-05	-1e-05	1e-05	0	0.06173	0	2e-05	0	7e-05	0	0	0.00272	0.06593	222	Cu4-P4-H48-C28-N4-O20	4	4	equal_bothsteps	equal	4	Success at all eik	This sg doesnt have any
1396	ELUGUO_FSR	0.07826	-0.03373	0.01789	0	0.00194	0	0	-2e-05	-1e-05	0.10903	0	0.12113	0.06445	0.07774	0.00081	0	0.04361	0	0.162972	m	C40-Cu2-F8-H32-N4-O10	0	2	notequal_bothsteps	equal	0	Success at all eik	This sg doesnt have any
1397	AXEKOF_FSR	-2e-05	-1e-05	-4e-05	0.01331	2e-05	-0.01288	0.02926	-0.02891	-0.04989	0	0.04367	0	0	0.00018	1e-05	-0.02797	0.00011	0.0546	0.0780258	2	Cu2-H40-C50-N4-O6	0	2	notequal_bothsteps	equal	0	Success at all eik	This sg doesnt have any
1398	FAZWOS_FSR	-0.0002	1e-05	-0.00086	-0.00412	0	0	-8e-05	0	-0.00017	0	0.0384	0	0	0	-1e-05	0	0	0.0563	0.0563	222	Cu4-H28-C24-N4-Cl4	0	0	equal_bothsteps	equal	0	Success at all eik	This sg doesnt have any
1399	IROTAL_FSR	7e-05	2e-05	0.0001	0	-0.04019	0	1e-05	0	-2e-05	0.05545	0	0	-0.0727	0.04367	0.1603	0	0	0	0.181352	mm2	C36-Cl2-Cu4-H24-N8-O4	2	2	equal_bothsteps	equal	2	Success at all eik	This sg doesnt have any
1400	NALLAP_FSR	-0.00045	-0.00045	-0.00053	-0.03467	0	0	-3e-05	-2e-05	0	0	0.01811	0	-1e-05	0	0	0	0	-0.03805	0.03805	222	Cu4-H32-C48-I4-N8	0	0	equal_bothsteps	equal	0	Success at all eik	This sg doesnt have any
1401	ASUQIO04_FSR	-2e-05	-1e-05	-5e-05	0	-0.04851	0	-1e-05	-2e-05	1e-05	0.01168	0	0	-0.03396	0.21181	0.0606	0	0	0	0.222911	mm2	C24-Cu6-H36-N18	0	0	equal_bothsteps	equal	0	Success at all eik	This sg doesnt have any
1402	NUKNEN_FSR	2e-05	-1e-05	-2e-05	0.13516	-1e-05	-0.10396	0.04513	-0.0524	0.00822	0	0.0241	0	-1e-05	0	1e-05	0.02645	1e-05	0.03971	0.17055	2	Cu4-H24-C36-O20	0	0	equal_bothsteps	equal	0	Success at all eik	This sg doesnt have any
1403	SAQGAU_FSR	-0.02281	-0.02084	-0.02013	0.01514	0.00178	0.10854	0.01895	-0.11493	-0.03873	0.00044	-0.04867	-0.00082	0.0085	0.00134	0.00698	-0.00737	-0.00104	-0.01011	0.136845	2	C14-Cu1-H16-N2-O6	1	1	equal_bothsteps	equal	1	Failed at e35	This sg doesnt have any
1404	TORXOP01_FSR	5e-05	0.00043	0.00021	0.03595	0	0	0.00048	0.00034	0.00024	0	-0.02316	0	0	0	0	0	0	-0.03049	0.0359532	222	Cu4-H4-C4-N28	0	4	notequal_bothsteps	equal	0	Success at all eik	This sg doesnt have any
1405	XOVPII_FSR	-0.01425	-0.0144	-0.01066	-0.04704	0.00046	-0.00112	0.00091	0.00083	-0.00061	0.00033	-0.02841	-0.00132	0.01179	0.01129	0.01425	-0.00042	0.00076	-0.02193	0.0533005	222	Cu4-H28-C32-N12-O8	0	2	notequal_bothsteps	notequal	2	Success at all eik	This sg doesnt have any
1406	RORSID01_FSR	-0.04906	0.04875	-0.00031	0.00034	0	0	0.00019	-0.00012	-9e-05	0.00029	-0.0003	0.04885	0	0	4e-05	0	0	0	0.0691647	32	Cu6-H36-C42-N18-O18	6	6	equal_bothsteps	equal	6	Success at all eik	Success at all eik
1407	HORWIU_FSR	-6e-05	0.0001	9e-05	0	-0.07841	0	8e-05	4e-05	2e-05	-0.08009	0	0	-0.01504	0.01072	0.35817	0	0	0	0.358646	mm2	C6-Cu4-H6-I4-N6	0	0	equal_bothsteps	equal	0	Success at all eik	This sg doesnt have any
1408	MUJGII02_FSR	-8e-05	-9e-05	-4e-05	0.04459	0	0	0	1e-05	-1e-05	0	0.04462	0	-2e-05	-2e-05	-3e-05	0	0	0.04602	0.04602	-42m	Zn2-Cu4-H24-C24-N16	0	0	equal_bothsteps	equal	0	Success at all eik	Success at all eik
1409	WESRIW_FSR	-8e-05	8e-05	-6e-05	0.09304	0	0	0	0	0	0	0.07894	0	1e-05	-1e-05	0	0	0	0.06166	0.0930401	222	Cu4-H40-C32-N8-Cl4-O4	0	0	equal_bothsteps	equal	0	Success at all eik	This sg doesnt have any
1410	XIFXEQ_FSR	1e-05	6e-05	4e-05	-0.00786	-1e-05	-0.00937	-0.0039	-0.01432	0.00381	0	0.00777	0	0	1e-05	0	0.02231	0	0.07474	0.0788056	2	Cu4-H32-C36-N16-O4	0	0	equal_bothsteps	equal	0	Success at all eik	This sg doesnt have any
1411	LOVSOE_FSR	-0.06974	-0.01863	-0.07848	0	-0.06651	0	0.0001	9e-05	7e-05	0.00506	2e-05	0.02054	-0.06064	-0.03866	-0.08561	0	0.06892	0	0.153765	m	C11-Cu1-H6-N7-S1	0	0	equal_bothsteps	equal	0	Success at all eik	This sg doesnt have any
1412	EDAWOY_FSR	0	-1e-05	-2e-05	0.02864	0	0	2e-05	-1e-05	1e-05	0	0.02999	0	0	-1e-05	1e-05	0	0	-0.05469	0.05469	222	Cu4-P4-H64-C32-N4-O24	4	4	equal_bothsteps	equal	4	Success at all eik	This sg doesnt have any
1413	ACRNCU_FSR	-5e-05	5e-05	1e-05	0	0.0544	0	6e-05	4e-05	6e-05	0.01867	0	0	0.0843	0.25501	0.57332	0	0	0	0.633113	mm2	Cu8-H12-C12-N4-Cl8	0	0	equal_bothsteps	equal	0	Success at all eik	This sg doesnt have any
1414	CIBRIR_FSR	0.00501	0.00464	0.00958	-0.0446	0.00165	-0.06404	-0.04552	-0.14978	-0.15381	5e-05	-0.03559	0.00136	0.01308	0.01464	0.01575	-0.13885	0.00142	-0.02402	0.225232	2	C32-Cl2-Cu1-H32-N4-O2	1	1	equal_bothsteps	equal	1	Failed at e35	This sg doesnt have any
1415	ILAMEN_FSR	0	1e-05	3e-05	-0.03356	0	-0.06837	-0.03042	-0.05415	-0.08525	0	-0.00421	0	-1e-05	0	-1e-05	-0.00834	0	0.02904	0.10556	2	Cu4-H48-C30-N8-Cl8-O2	0	4	notequal_bothsteps	equal	0	Success at all eik	This sg doesnt have any
1416	PIGZOV_FSR	-1e-05	3e-05	1e-05	0.04815	0	0	1e-05	-2e-05	0	0	0.01619	0	0	2e-05	-2e-05	0	0	0.00892	0.04815	222	Cu4-H64-C32-N8-Cl4	0	0	equal_bothsteps	equal	0	Success at all eik	This sg doesnt have any
1417	AXEWAD_FSR	-0.04335	-0.0212	-0.0636	0	0.01991	0	-2e-05	-2e-05	0	-0.02864	1e-05	0.05829	-0.0106	-0.08154	0.03154	0	0.01913	0	0.0912452	m	C34-Cu4-H40-I4-N8-S2	0	0	equal_bothsteps	equal	0	Success at all eik	This sg doesnt have any
1418	OPOJUA_FSR	-0.08882	0.02901	0.03573	0.00578	0.02168	-0.0146	-0.00966	0.00157	0.04271	-0.02473	0.01009	0.01802	-0.02152	-0.04076	-0.03581	-0.00788	-0.04295	-0.00106	0.108991	1	Cu1-H29-C32-N5-O6	1	1	equal_bothsteps	equal	1	This sg doesnt have any	This sg doesnt have any
1419	HIFZUS_FSR	0.00015	-0.0001	0.00014	-0.0009	0	0	-9e-05	0.00017	0.00016	0	0.00092	0	0	0	-0.00022	0	0	0	0.000954677	422	Cu8-H24-C32-I8-N16	0	0	equal_bothsteps	equal	0	Success at all eik	Success at all eik
1420	DAMTUJ_FSR	-0.10564	-0.045	0.05269	0.00069	-0.00152	0.02212	0.03548	0.01745	0.03772	-0.00191	-0.00288	-0.0765	-0.00438	-0.08728	-0.03047	0.01874	-0.09968	-0.06972	0.155788	1	Cu1-H38-C26-N4-O8	1	1	equal_bothsteps	equal	1	This sg doesnt have any	This sg doesnt have any
1421	DEJGOP_FSR	9e-05	-4e-05	-0.00021	0.09965	-1e-05	0.04171	-0.18555	-0.17096	-0.19314	0	-0.00152	0	-0.0001	-6e-05	-6e-05	0.00904	-8e-05	-0.03681	0.317744	2	Cu4-H24-C40-S2-N16	0	0	equal_bothsteps	equal	0	Success at all eik	This sg doesnt have any
1422	IVOQEQ_FSR	3e-05	-2e-05	-2e-05	-0.02614	0	0	-1e-05	2e-05	-1e-05	0	0.00887	0	-2e-05	-7e-05	0.00011	0	0	-0.08611	0.0861101	222	Cu4-H44-C72-N4-O12	4	4	equal_bothsteps	equal	4	Success at all eik	This sg doesnt have any
1423	QANLIA_FSR	0.01505	0.01485	0.01464	-0.04737	-0.00064	-0.02905	-0.02754	-0.00655	-0.03189	-0.00182	0.04802	0.00037	-0.0101	-0.00903	-0.00961	-0.03834	-0.00012	-0.00538	0.0706497	2	C12-Cu1-H14-N4-O5	1	1	equal_bothsteps	equal	1	Success at all eik	This sg doesnt have any
1424	AKAYER_FSR	0.00022	0.00013	-0.00074	0.00443	-0.00023	-0.00965	0.01044	0.02318	-0.02045	0	0.01346	0	0.00015	9e-05	0.00027	-0.00225	3e-05	0.03203	0.0353025	2	C48-Cu4-H30-I4-N6-O12	0	0	equal_bothsteps	equal	0	Success at all eik	This sg doesnt have any
1425	LOVTOF_FSR	0.11659	0.14692	0.04563	0	0.039	0	-9e-05	-6e-05	-0.0001	0.08751	3e-05	-0.00988	0.08718	0.02496	-0.08209	0	-0.00635	0	0.205729	m	Cu6-H12-C16-S6-N10	0	0	equal_bothsteps	equal	0	Success at all eik	This sg doesnt have any
1426	CAWXAZ_FSR	3e-05	0	2e-05	0.00222	0	0	1e-05	1e-05	0	0	-0.00055	0	-2e-05	-1e-05	-1e-05	0	0	-0.00011	0.00222029	222	Cu8-H48-C48-N24	0	0	equal_bothsteps	equal	0	Success at all eik	This sg doesnt have any
1427	JETQOP_FSR	-3e-05	7e-05	0	-0.0945	-0.00951	-0.00012	2e-05	8e-05	-1e-05	-0.00942	0.0947	-8e-05	-0.00645	-0.00645	-0.03625	0	0	0	0.095182	6	Cu8-H36-C24-I2-N18	0	0	equal_bothsteps	equal	0	Success at all eik	Success at all eik
1428	CURGUR_FSR	-2e-05	0	0	0	-0.12213	0	0	0	-1e-05	0.00509	0	0	-0.04643	0.13085	-0.0095	0	0	0	0.139168	mm2	Cu4-H36-C48-S4-N16-O4	0	0	equal_bothsteps	equal	0	Success at all eik	This sg doesnt have any
1429	NAWSEM_FSR	1e-05	3e-05	2e-05	0.0298	0	0	2e-05	2e-05	0	0	0.00552	0	5e-05	1e-05	6e-05	0	0	-0.02249	0.0298	222	Cu4-Mo12-H32-C32-S8-N8-O40	0	4	notequal_bothsteps	equal	0	Success at all eik	This sg doesnt have any
1430	IWIVIV02_FSR	-0.00256	-0.0019	-0.00184	0.04086	0	0	-0.00149	-0.00359	-0.00431	0	0.11537	0	0.00011	-1e-05	-3e-05	0	0	0.04978	0.115516	222	Cu4-H4-C8-N16-O8	0	0	equal_bothsteps	equal	0	Success at all eik	This sg doesnt have any
1431	ZUQPIK_FSR	0	0	0	0	0.01591	0	0	0	0	0.00896	0	0	-0.04606	-0.00849	-0.03431	0	0	0	0.0580584	mm2	C64-Cu4-H64-I4-S8	0	0	equal_bothsteps	equal	0	Success at all eik	This sg doesnt have any
1432	QILRIO_FSR	0.00116	0.00085	0.0001	-0.04442	-0.00167	-0.04001	-0.05747	-0.10464	0.24857	0	-0.12208	0	-0.00057	-0.00046	-5e-05	0.20243	0.00019	-0.05067	0.301568	2	Cu4-H20-C8-S2-N16-O12	0	0	equal_bothsteps	equal	0	Success at all eik	This sg doesnt have any
1433	UZEBAE_FSR	0.00018	6e-05	5e-05	0	-0.00179	0	-0.00023	-0.00029	-0.00012	-0.01338	0	0	0.08117	0.10617	0.10245	0	0	0	0.168395	mm2	Cu6-H20-C24-S4-I2-O4	0	0	equal_bothsteps	equal	0	Success at all eik	This sg doesnt have any
1434	SAWVUH_FSR	-0.0026	-0.00203	-0.00269	-0.02033	0	0	0.00042	0.00026	0.00038	0	0.01066	0	0.00016	0.00014	0.00016	0	0	-0.03189	0.0318911	222	Cu4-H36-C40-N4-Cl4	0	0	equal_bothsteps	equal	0	Success at all eik	This sg doesnt have any
1435	CEPGEJ_FSR	-0.00894	-0.00782	-0.01014	0	-0.0226	0	-0.00164	-0.00174	-0.00149	0.01436	0	0	0.35796	0.24768	0.30118	0	0	0	0.529564	mm2	C40-Cu4-H40-I4-N16	0	0	equal_bothsteps	equal	0	Success at all eik	This sg doesnt have any
1436	MILTAC_FSR	0	1e-05	-1e-05	-0.00362	0	0	-1e-05	-3e-05	0	0	-0.06245	0	2e-05	-3e-05	1e-05	0	0	-0.08797	0.08797	222	Cu4-H56-C32-N8-O12	0	4	notequal_bothsteps	notequal	2	Success at all eik	This sg doesnt have any
1437	UZEBAE01_FSR	-1e-05	-0.00012	-0.00021	-0.04686	0	0	0	-2e-05	0	0	-0.05817	0	-0.00015	-0.00116	-0.00019	0	0	0.00572	0.05817	222	Cu6-H20-C24-S4-I2-O4	0	0	equal_bothsteps	equal	0	Success at all eik	This sg doesnt have any
1438	KAKTIA01_FSR	0.00021	8e-05	0.00011	-0.05623	0	0	0	0	1e-05	0	-0.02511	0	3e-05	3e-05	4e-05	0	0	-0.01677	0.0562306	222	Cu8-H16-C24-N4-Cl4-O8	0	0	equal_bothsteps	equal	0	Success at all eik	This sg doesnt have any
1439	SIKYUI_FSR	0.00049	0.00033	0.00012	-0.01054	-0.00017	-0.01946	0.04374	-0.21296	-0.10687	0	-0.01364	0	-8e-05	-0.00012	-3e-05	-0.11142	3e-05	0.0085	0.242636	2	C10-Cu1-H10-I1-O2-P2	0	0	equal_bothsteps	equal	0	Success at all eik	This sg doesnt have any
1440	MUSGIQ_FSR	0.00019	0.00018	0.00022	0.01366	0	0	1e-05	-1e-05	1e-05	0	0.02016	0	3e-05	1e-05	-1e-05	0	0	0.01479	0.02016	222	Cu8-H32-C48-I8-N8	0	0	equal_bothsteps	equal	0	Success at all eik	This sg doesnt have any
1441	QULNES_FSR	0.17094	0.12468	-0.01224	0	0.02029	0	0	-3e-05	0	0.04292	0	0.07941	-0.0073	0.07783	0.2367	0	0.0353	0	0.255637	m	C10-Cl6-Cu6-H22-N10-S2	0	0	equal_bothsteps	equal	0	Success at all eik	This sg doesnt have any
1442	HAWBOY_FSR	0.25914	0.03549	0.03158	0.00063	0.04127	-0.01033	0.12894	-0.00106	-0.11281	-0.02879	0.04349	0.0748	0.16361	0.07013	-0.04175	-0.04857	0.19612	0.0835	0.388491	1	Cu1-H18-C16-N4-O4	1	1	equal_bothsteps	equal	1	This sg doesnt have any	This sg doesnt have any
1443	LENSED_FSR	-0.01069	-0.01058	-0.01413	-0.0136	-0.00059	-0.00798	-0.01129	-0.02234	0.00955	0.00016	0.00196	-0.00059	0.00493	0.00822	0.00364	0.02647	-0.00355	-0.02448	0.040443	2	C36-Cl4-Cu4-H44-N8-O8	2	4	notequal_bothsteps	equal	2	Failed at e35	This sg doesnt have any
1444	KEVXEQ_FSR	0.00015	2e-05	0.00031	0.0939	-0.00019	0.09618	-0.0309	-0.25527	-0.84279	0	0.01311	0	5e-05	-7e-05	-0.00033	-0.14676	-0.0001	-0.05481	0.88124	2	Cu4-H8-C2-O10	0	4	notequal_bothsteps	equal	0	Success at all eik	This sg doesnt have any
1445	RORSID05_FSR	0.05062	-0.05067	-0.00015	0.00161	0	0	0.00015	-0.00022	0.0004	-0.00017	-0.00175	-0.0505	-1e-05	-1e-05	-2e-05	0	0	0	0.071642	32	Cu6-H36-C42-N18-O18	6	6	equal_bothsteps	equal	6	Success at all eik	Success at all eik
1446	FURQAL_FSR	-2e-05	0	-1e-05	0.00092	3e-05	-0.00697	0.00903	0.00928	0.02542	0	0.01498	0	-6e-05	1e-05	-9e-05	0.0004	-4e-05	0.00901	0.0322219	2	Cu4-H64-C56-N8-O12	0	0	equal_bothsteps	notequal	2	Success at all eik	This sg doesnt have any
1447	SAQSAF03_FSR	2e-05	-1e-05	-0.00015	0	0	0	-0.00015	1e-05	-1e-05	0	0	0	0	-0.00014	3e-05	0	0	0	0.000158669	m-3	Cu8-H24-C24-S24-N24-Cl8	0	0	equal_bothsteps	equal	0	Centro as per csd	Centro as per csd
1448	QAVDOG_FSR	-0.01323	-0.01369	-0.01597	0.00028	-0.26544	0.0017	-0.00104	-0.00427	0.00032	0.07686	-0.00081	-0.00142	-0.15919	0.10941	-0.09438	0.00059	-0.00025	0.00044	0.266965	mm2	C8-Cu4-H12-N16-O16-S2	4	4	equal_bothsteps	equal	4	Success at all eik	This sg doesnt have any
1449	YEHBAQ_FSR	0.00995	0.01085	0.01126	0.00038	-0.00328	0.00029	-0.0163	-0.01697	-0.01677	0.00118	-0.00094	-0.00077	-0.01192	-0.01421	-0.01142	-0.00215	-0.00017	-0.00221	0.0406678	1	Cu1-H20-C14-N14-O6	1	1	equal_bothsteps	equal	1	This sg doesnt have any	This sg doesnt have any
1450	OVAZOB_FSR	0.00013	9e-05	-0.00018	-0.06247	0	0	0	-3e-05	0	0	0.0768	0	1e-05	3e-05	3e-05	0	0	0.0243	0.0768	222	Cu4-H48-C44-N12-O16	4	4	equal_bothsteps	equal	4	Success at all eik	This sg doesnt have any
1451	IZUPOI_FSR	0.0202	0.02199	0.02698	0.0166	-0.03789	0.00076	0.00838	0.00744	0.01107	0.03275	0.01381	0.00156	0.01643	0.02242	0.02564	0.00187	-0.00112	-0.03655	0.0697483	-4	C32-Cu4-H32-N4-O12	0	4	notequal_bothsteps	notequal	2	Failed at e35	Failed at e32
1452	NUZZEN_FSR	0.09801	-0.00026	0.01366	-0.02475	0.02242	-0.03718	0.01549	0.06893	-0.01706	-0.07504	-0.04223	-0.04233	0.07808	-0.00309	-0.05625	0.05126	-0.00589	0.01497	0.133605	1	K2-Cu1-H47-C35-N7-O9	1	1	equal_bothsteps	equal	1	This sg doesnt have any	This sg doesnt have any
1453	QOJVAM_FSR	0.10386	0.08727	-0.00712	0	-0.05053	0	-1e-05	-3e-05	0	0.00927	2e-05	-0.01348	0.08862	0.09189	-0.00887	0	-0.02327	0	0.193746	m	C68-Cu4-H48-I4-N12	0	0	equal_bothsteps	equal	0	Success at all eik	This sg doesnt have any
1454	FIPHOD_FSR	1.7794	0.98505	1.35838	-0.32442	-0.306	0.64335	-1.6207	-1.06076	-1.42456	0.17135	0.12286	-0.38666	1.05293	0.53152	0.76401	-0.30152	-0.19559	0.41385	3.8381	1	Fe1-Cu1-H30-C19-N11	0	0	equal_bothsteps	equal	0	This sg doesnt have any	This sg doesnt have any
1455	QUFBUP_FSR	-2e-05	1e-05	4e-05	0	-0.05745	0	0	-2e-05	-1e-05	-0.06023	0	0	-0.00694	-0.13344	-0.17868	0	0	0	0.223116	mm2	C56-Cu4-F16-H32-N8-O16	0	4	notequal_bothsteps	equal	0	Success at all eik	This sg doesnt have any
1456	KIZXIA_FSR	-0.00011	-0.00014	-0.0003	-0.00366	0	0	-1e-05	0	0	0	-0.05424	0	0	0	0	0	0	0.00678	0.05424	222	Cu4-H28-C36-N4-Cl4	0	0	equal_bothsteps	equal	0	Success at all eik	This sg doesnt have any
1457	SAQSEJ_FSR	-5e-05	-1e-05	0.00014	0	0	0	0.00013	-4e-05	-2e-05	0	0	0	-2e-05	0.00013	-6e-05	0	0	0	0.000176108	m-3	Cu8-H24-C24-S24-Br8-N24	0	0	equal_bothsteps	equal	0	Centro as per csd	Centro as per csd
1458	GUSCUU_FSR	-0.00065	-0.00066	-0.00026	-0.03138	0	0	3e-05	4e-05	2e-05	0	0.15777	0	3e-05	0	2e-05	0	0	-0.14508	0.15777	222	Cu4-H32-C40-N8-O12	0	1	notequal_bothsteps	equal	0	Success at all eik	This sg doesnt have any
1459	KEXFAV_FSR	0	0	0	0	-0.03927	0	0	0	0	0.06421	0	0	0.0349	0.06095	0.00587	0	0	0	0.0704796	mm2	C60-Cu8-H48-I4-N12-S14-W2	0	0	equal_bothsteps	equal	0	Success at all eik	This sg doesnt have any
