# Supplementary material for: Computational screening of piezoelectric constants in metal–organic frameworks: design principles and ferroelectric-like bond modulation
Source: J Mater Chem A Mater. 2026 Feb 24;14(23):14311–23. doi: 10.1039/d5ta09332e (PMC12951834; doi:10.1039/d5ta09332e)
Supplement: TA-014-D5TA09332E-s005 [file TA-014-D5TA09332E-s005.xlsx]

## Sheet: topcandidates
info_MOF	Dynamic_e_samedirec	Dynamic_e_samedirec_value	Total_emax_idx	Total_emax_value	Clamped_e_samedirec	Clamped_e_samedirec_value
YECPEE	e31	-1.2361	e31	-1.23377	e31	0.00233
VAFYOQ	e33	-1.39263	e33	-1.38186	e33	0.01077
NAHSQU01	e35	0.56872	e35	0.60758	e35	0.03886
BALFAV01	e11	2.25029	e11	2.3613	e11	0.11101
EHOHOY	e11	-1.72457	e11	-1.07648	e11	0.64809
GAXQAZ	e11	0.50575	e11	0.52732	e11	0.02157
UVAROZ	e13	-0.7214	e13	-0.72429	e13	-0.00289
AGALUR	e25	0.92619	e25	0.94373	e25	0.01754
