# Supplementary material for: Computational screening of piezoelectric constants in metal–organic frameworks: design principles and ferroelectric-like bond modulation
Source: J Mater Chem A Mater. 2026 Feb 24;14(23):14311–23. doi: 10.1039/d5ta09332e (PMC12951834; doi:10.1039/d5ta09332e)
Supplement: TA-014-D5TA09332E-s006 [file TA-014-D5TA09332E-s006.xlsx]

## Sheet: nahsqu01_piezo
	11	12	13	14	15	16	21	22	23	24	25	26	31	32	33	34	35	36	Norm
piezo_e	0.171	0.15	0.399	0	0.273	0	0	0	0	0.087	0	0.031	0.094	0.066	0.609	0	0.333	0	0.874657
piezo_d	1.918	0.762	1.427	0	9.079	0	0	0	0	4.729	0	0.987	-6.247	-1.326	11.051	0	3.605	0	13.7308
Elastic Compliance (TPa-1)	1	2	3	4	5	6
1	36.429	10.621	28.529	0	5.759	0
2	10.621	102.72	23.659	0	1.946	0
3	28.529	23.659	65.7	0	25.567	0
4	0	0	0	17.363	0	5.239
5	5.759	1.946	25.567	0	24.645	0
6	0	0	0	5.239	0	6.04
Elastic constant (GPa)	1	2	3	4	5	6
1	45.3708	1.1475	-26.7546	0	17.0635	0
2	1.1475	11.0649	-6.7724	0	5.8838	0
3	-26.7546	-6.7724	44.6693	0	-39.5539	0
4	0	0	0	78.0125	0	-67.6709
5	17.0635	5.8838	-39.5539	0	77.158	0
6	0	0	0	-67.6709	0	224.275
/home/srinidhi/MoMOFs/NAHSQU01/exp_Pc/elapiezo

## Sheet: vafyoq_piezo
	11	12	13	14	15	16	21	22	23	24	25	26	31	32	33	34	35	36	Norm
piezo_e	0.46	0.173	-0.443	0	0.101	0	0	0	0	0.087	0	0.256	-0.32	-0.226	1.423	0	-0.066	0	1.5847
piezo_d	16.575	3.401	-18.174	0	-7.904	0	0	0	0	6.901	0	17.947	-21.607	-18.177	50.372	0	39.879	0	74.1022
Elastic Compliance (TPa-1)	1	2	3	4	5	6
1	39.3924	-25.3086	-11.3782	0	-21.9334	0
2	-25.3086	62.9804	-8.2214	0	4.7982	0
3	-11.3782	-8.2214	32.9666	0	30.7339	0			4.798
4	0	0	0	159.868	0	-27.2347			159.868
5	-21.9334	4.7982	30.7339	0	148.25	0
6	0	0	0	-27.2347	0	79.427
Elastic constant (GPa)	1	2	3	4	5	6
1	45.048	20.371	18.631	0	2.143	0
2	20.371	25.982	14.236	0	-0.778	0
3	18.631	14.236	47.32	0	-7.514	0			0.778
4	0	0	0	6.643	0.	2.278			47.32
5	2.143	-0.778	-7.514	0	8.645	0
6	0	0	0	2.278	0.	13.371
/home/srinidhi/MoMOFs/VAFYOQ/exp_Cc/redo/elapiezo/restart/restart2/restart3/restart4/restart5/restart6/restart7

## Sheet: balfav01_piezo
	11	12	13	14	15	16	21	22	23	24	25	26	31	32	33	34	35	36	Norm
piezo_e	2.125	-0.836	-0.268	0.02	0.014	0.006	-0.78	1.37	-0.146	-0.107	0	0.073	0.015	-0.065	-0.02	0.011	0.013	-0.003	2.64557
piezo_d	86.248	-55.205	-15.242	-41.997	-1.639	-7.991	-46.489	45.031	3.675	23.28	10.108	10.545	1.478	-1.665	-0.362	-0.441	6.278	0.109	131.449
Elastic Compliance (TPa-1)	1	2	3	4	5	6
1	46.366	29.621	20.444	-1.871	0.383	0
2	29.621	65.281	13.7	-9.727	0.165	-1.707
3	20.444	13.7	110.892	-9.898	1.293	-0.205			0.165
4	-1.871	-9.727	-9.898	12.063	-0.049	0.011			110.892
5	0.383	0.165	1.293	-0.049	2.15	-1.44
6	0	-1.707	-0.205	0.011	-1.44	18.364
Elastic constant (GPa)	1	2	3	4	5	6
1	33.7436	-16.0698	-5.2725	-12.0625	-3.8867	0
2	-16.0698	25.2085	1.529	19.0958	2.5186	3.0848
3	-5.2725	1.529	10.681	9.1573	-5.3828	0.0105
4	-12.0625	19.0958	9.1573	103.932	-0.9966	2.1415
5	-3.8867	2.5186	-5.3828	-0.9966	495.049	39.1113
6	0	3.0848	0.0105	2.1415	39.1113	57.9052
/home/srinidhi/MoMOFs/BALFAV01/P1_exp_2021/elapiezo/restart

## Sheet: ehohoy_piezo
	11	12	13	14	15	16	21	22	23	24	25	26	31	32	33	34	35	36	Norm
piezo_e	-1.117	-0.36	-0.011	0	-0.163	0	0	0	0	0.294	0	0.139	0.025	0.36	0.337	0	-0.636	0	1.18673
piezo_d	-12.6	-0.999	3.391	0	-6.484	0	0	0	0	11.787	0	42.089	-0.356	5.505	8.532	0	-38.384	0	43.7083
Elastic Compliance (TPa-1)	1	2	3	4	5	6
1	87.741	22.283	11.517	0	4.302	0
2	22.283	93.012	19.429	0	8.076	0			3.811
3	11.517	19.429	58.656	0	6.941	0			93.012
4	0	0	0	38.54	0	-3.811
5	4.302	8.076	6.941	0	19.219	0
6	0	0	0	-3.811	0	4.36
Elastic constant (GPa)	1	2	3	4	5	6
1	12.2882	-2.5436	-1.4324	0	-1.1644	0
2	-2.5436	12.3242	-3.173	0	-3.4638	0
3	-1.4324	-3.173	18.997	0	-5.2064	0
4	0	0	0	28.4015	0	24.8255
5	-1.1644	-3.4638	-5.2064	0	55.629	0
6	0	0	0	24.8255	0	251.083
/home/srinidhi/MoMOFs/EHOHOY/exp_Pc/elapiezo

## Sheet: Sheet1
e norm (C/m2)	VASP	CRYSTAL17	Diff	(vasp-crystal)%/vasp
NAHSQU01	1.198	0.875	0.323	26.9616	36.9143
VAFYOQ	1.506	1.585	0.079	5.24568	4.98423
BALFAV01	2.763	2.646	0.117	4.23453	4.42177
EHOHOY	1.159	1.187	0.028	2.41588	2.35889
		stdev	0.12941
