# Supplementary material for: Computational screening of piezoelectric constants in metal–organic frameworks: design principles and ferroelectric-like bond modulation
Source: J Mater Chem A Mater. 2026 Feb 24;14(23):14311–23. doi: 10.1039/d5ta09332e (PMC12951834; doi:10.1039/d5ta09332e)
Supplement: TA-014-D5TA09332E-s007 [file TA-014-D5TA09332E-s007.xlsx]

## Sheet: Sheet1
info_MOFCode	metal_groupinfo	metal_atno	oxidation_num	alloxdnum	allatno	fromvasporcif?	BEC_metalavg	e11	e12	e13	e14	e15	e16	e21	e22	e23	e24	e25	e26	e31	e32	e33	e34	e35	e36	info_TotaleNorm	info_PointGroup	info_Atoms	info_ClampedNorm	info_DynamicNorm	info_smilesnodes	info_smileslinkers	info_natoms	info_density	info_Structuretype	info_qmofcsdequal?	info_ClampedDynamic_convergence
BALFAV01_FSR	['6']	[42]	[6]	[6, 6]	[42 42]	vasp	[6.866]	2.3613	-0.73492	-0.32437	-0.01769	0.01075	0.04255	-0.69779	1.4456	-0.13031	-0.10966	0.00821	0.06763	0.01137	-0.06346	-0.01229	0.00576	0.00597	-0.00824	2.7634	1	C10-H8-Mo2-N2-O6	0.190643	2.72132	['[Mo]', '[O]']	['n1ccc(cc1)c1ccncc1']	56	2.18156	Polar	equal	Converged
YECPEE_FSR	['1']	[19]	[1]	[1, 1, 1, 1]	[19 19 19 19]	vasp	[1.327]	-0.00241	-0.03836	-0.05929	0	-0.06172	0	-4e-05	0.00021	3e-05	0.16929	7e-05	0.01125	-1.23377	0.59421	-0.12445	0	-0.72711	0	1.5556	m	C12-H8-K4-N12-O8	0.0125283	1.55188	['O', '[K]']	['O=C1C2=C(N=N[N]2)C(=O)C2=NN=N[C]12']	44	1.8997	Polar	equal	Converged
VAFYOQ_FSR	['6']	[42]	[6]	[6, 6]	[42 42]	vasp	[5.43]	-0.42604	-0.14259	0.1561	0	0.01989	0	1e-05	7e-05	4e-05	-0.03411	-1e-05	-0.34255	0.37134	0.29502	-1.38186	0	-0.21556	0	1.50581	m	C20-H16-Mo2-N4-O6	0.170979	1.52942	['[Mo]', '[O]']		48	2.06204	Polar	equal	Converged
NAHSQU01_FSR	['1']	[11]	[1]	[1, 1]	[11 11]	vasp	[1.203]	0.44753	0.15192	0.5844	0	0.4264	0	-1e-05	0	0	0.09506	0	0.03231	0.19543	0.10324	0.56488	0	0.60758	0	1.1976	m	Na2-H6-C8-O10	0.0625578	1.14711	['[OH2][Na]']	['O[C]1C(=O)C(=O)C1=O.O[C]1C(=O)C(=O)C1=O']	26	1.86031	Polar	equal	Converged
EHOHOY_FSR	['15']	[51]	[3]	[3]	[51 51 51 51]	vasp	[3.929]	-1.07648	-0.25839	-0.07356	0	-0.22685	0	0.00019	-8e-05	-0.0001	0.29451	-1e-05	0.12136	-0.17254	0.22482	0.31636	0	-0.54835	0	1.15895	m	Sb4-P4-H4-C2-O14	0.724227	1.77185	['[Sb]O[Sb]']	['[O]P(=O)(CP(=O)([O])[O])[O]']	28	3.83776	Polar	equal	Converged
GAXQAZ_FSR	['12']	[30]	[2]	[2, 2]	[30 30]	vasp	[2.133]	0.52732	-0.08686	0.41524	0	0.40268	0	-6e-05	1e-05	-4e-05	0.03719	-3e-05	-0.00053	-0.51818	0.06511	-0.37153	0	-0.40511	0	1.09283	m	C40-H44-N8-O8-Zn2	0.081074	1.07055	['[Zn]']	['C(Cn1cncc1)CCn1cncc1', '[O-]C(=O)Cc1ccc(cc1)CC(=O)[O-]']	102	1.5008	Polar	equal	Converged
UVAROZ_FSR	['12']	[30]	[2]	[2, 2]	[30 30]	vasp	[2.705]	-0.50507	-0.36147	-0.72429	0	-0.05603	0	1e-05	1e-05	0	-0.01317	0	0.04101	-0.28806	-0.13967	-0.3529	0	0.01749	0	1.06619	m	C56-H40-N4-O8-Zn2	0.066311	1.07077	['[Zn]']	['[O-]C(=O)c1ccc(cc1)C=Cc1ccncc1']	110	1.21681	Polar	equal	Converged
GIRQAB_FSR	['12']	[80]	[2]	[2, 2, 2, 2, 2, 2, 2, 2]	[80 80 80 80 80 80 80 80]	vasp	[2.2]	6e-05	-7e-05	-0.0001	0	-0.97753	0	6e-05	-2e-05	-0.00012	0.04501	0	0	0.06336	-0.02598	0.13982	0	0	0	0.97753	mm2	C40-H32-Hg8-I16-N8-S4	0.141268	1.01327			108	3.87185	Polar	equal	Converged
QQQBKV10_FSR	['13']	[81]	[1]	[1, 1, 1, 1]	[81 81 81 81]	vasp	[1.765]	0	0	0	0	-0.15918	0	0	0	0	0.44637	0	0	0.6097	0.64269	0.36537	0	0	0	0.958269	mm2	Tl4-H4-C4-O8	0.400711	1.1305			20	5.23279	Polar	equal	Converged
AGALUR_FSR	['2']	[12]	[2]	[2, 2, 2, 2]	[12 12 12 12]	vasp	[2.194]	-1e-05	4e-05	4e-05	0.15027	0	0	0	0	0	0	0.94373	0	0	-1e-05	0	0	0	-0.00383	0.94373	222	Mg4-H56-C24-O44	0.01754	0.92619	['[OH2][Mg]([OH2])[OH2]']	['OC(C(C(=O)[O-])O)C(C(C(=O)[O-])O)O']	128	1.75163	Non-polar	equal	Converged
NURYOO01_FSR	['12']	[48]	[2]	[2, 2, 2, 2]	[48 48 48 48]	vasp	[2.274]	5e-05	-3e-05	-1e-05	0	0.91511	0	0	1e-05	0	0.09894	0	0	0.02698	0.11538	-0.03485	0	0	0	0.91511	mm2	Cd4-H28-C12-N4-Cl8-O8	0.0405674	0.90857			64	2.58653	Polar	equal	Converged
JOCNUN_FSR	['7']	[25]	[2]	[2, 2]	[25 25]	vasp	[2.384]	-0.11241	-0.30006	-0.40841	0	0.18201	0	-0.00144	-0.00265	0.00015	0.77233	-0.00092	0.48969	0.04576	0.00955	0.05669	0	0.07151	0	0.914495	m	C40-H34-Mn2-N14-O14	0.298569	0.825166	['[OH2][Mn]']	['C1=N[CH]N([N]1)Cc1ccc(cc1)Cn1cncn1', '[O-]C(=O)c1cc(cc(c1)N(=O)=O)C(=O)[O-]']	104	1.66851	Polar	equal	Converged
KULJEI_FSR	['15']	[83]	[3]	[3, 3, 3, 3, 3, 3, 3, 3]	[83 83 83 83 83 83 83 83]	vasp	[4.276]	0.00204	-0.00023	0.00573	0	0.00531	0	-0.00013	0.00052	0.0001	-0.01442	0	0	-0.32412	-0.33672	-0.68264	0	0	0	0.827322	mm2	Bi8-C28-H12-N4-O24	0.16139	0.861753	['[Bi]1O[Bi]2[O]1[Bi]1[O]2[Bi]O1']	['[O-]C(=O)c1cncc(c1)C(=O)[O-]']	76	4.21758	Polar	equal	Converged
QEVMOW01_FSR	['1', '1', '15']	[19, 3, 51]	[1, 1,3]	[1, 1,3,3]	[19 3 51 51]	vasp	[1.156, 1.389, 3.044]	0.00099	0.00068	0.00167	0.0265	0.00019	-0.01728	-0.38547	-0.26788	-0.6554	0	-0.01387	0	0.00194	0.00129	0.00346	-0.0058	0.00016	-0.03151	0.806294	2	C8-H4-K1-Li1-O12-Sb2	0.118542	0.806979			28	2.72495	Polar	equal	Converged
AFUKIW_FSR	['12']	[48]	[2]	[2, 2]	[48 48]	vasp	[2.461]	0.45723	0.23657	0.13788	0	0.142	0	0.00022	-0.00025	2e-05	0.07563	5e-05	0.1847	0.33515	0.29064	0.16596	0	0.14656	0	0.73641	m	C14-Cd2-H18-N2-O14	0.202256	0.81183	['[OH2][Cd]([OH2])[OH2]']	['[O-]C(=O)c1ccnc(c1)C(=O)[O-]']	50	2.1371	Polar	equal	Converged
PEJFAN_FSR	['14']	[82]	[2]	[2, 2]	[82 82]	vasp	[3.218]	0.00054	0.00015	-8e-05	0	-0.19258	0	-0.00059	-0.00014	6e-05	-0.11712	0	0	-0.67559	-0.19186	0.07	0	0	0	0.705785	mm2	C30-H24-N4-O8-Pb2	0.1345	0.730679	['[Pb]']	['[O-]C(=O)c1nccc(c1)CCCc1ccnc(c1)C(=O)[O-]']	68	2.16548	Polar	equal	Converged
UYURUC_FSR	['2']	[38]	[2]	[2, 2]	[38 38]	vasp	[2.707]	-1e-05	-7e-05	2e-05	0	-0.30463	0	0.00015	-0.00106	-0.0013	-0.15309	0	0	-0.00682	-0.13643	-0.67296	0	0	0	0.686686	mm2	C12-H16-N16-O10-Sr2	0.05489	0.643241	['[OH2][Sr]']	['[O-]C(=O)C1=N[C](N[N]1)N']	56	2.21816	Polar	equal	Converged
OPOBOL_FSR	['2']	[56]	[2]	[2, 2]	[56 56]	vasp	[2.986]	7e-05	0.00015	7e-05	0	0.09178	0	-2e-05	2e-05	1e-05	-0.68213	0	0	-0.00896	0.01699	0.13459	0	0	0	0.68213	mm2	Ba2-C24-H20-N4-O16	0.0574094	0.73179			66	2.14717	Polar	equal	Converged
UYUSAJ_FSR	['2']	[56]	[2]	[2, 2]	[56 56]	vasp	[2.793]	0	-1e-05	1e-05	0	0.28943	0	-2e-05	0.00083	0.00074	0.12698	0	0	0.02993	0.02915	0.66172	0	0	0	0.663038	mm2	Ba2-C12-H16-N16-O10	0.06629	0.628635	['[OH2][Ba]']	['[O-]C(=O)c1n[nH]c(n1)N']	56	2.35612	Polar	equal	Converged
EDAKIE_FSR	['1']	[19]	[1]	[1, 1]	[19 19]	vasp	[1.257]	-0.06319	-0.1356	-0.12541	0	0.02495	0	-4e-05	0	-1e-05	0.07524	-1e-05	0.05155	0.02641	0.04759	0.62881	0	-0.00555	0	0.646828	m	C8-H14-K2-O12	0.111182	0.683491	['[OH2][K]']	['[O-]C(=O)CC(C(=O)O)O']	36	1.75712	Polar	equal	Converged
BELXUN_FSR	['12']	[48]	[2]	[2, 2, 2, 2]	[48 48 48 48]	vasp	[2.246]	1e-05	0	1e-05	0	0.19571	0	0	0	1e-05	-0.64574	0	0	0.0308	0.01061	0.03935	0	0	0	0.64574	mm2	C32-Cd4-H24-N16-O8	0.117452	0.70234			84	2.17595	Polar	equal	Converged
FAYXEJ02_FSR	['10']	[28]	[2]	[2, 2]	[28 28]	vasp	[1.996]	-0.368	-0.16879	-0.44191	0	-0.03486	0	-5e-05	2e-05	-3e-05	-0.10406	-3e-05	0.11458	-0.05713	-0.15775	-0.13474	0	-0.0584	0	0.628467	m	C8-H12-Ni2-O12	0.262262	0.612915	['[OH2][Ni]']	['[O-]C(=O)CC(C(=O)[O-])O']	34	1.96366	Polar	equal	Converged
VESBEC01_FSR	['fblock']	[57]	[3]	[3, 3, 3, 3]	[57 57 57 57]	vasp	[4.339]	-0.00016	0.00023	0.0001	-0.02948	0.18445	-0.00012	4e-05	0.00017	0.00013	0.18444	0.02948	0.00013	0.11281	0.11281	0.58851	0	0	0	0.609751	4	La4-H12-C4-S4-O28	0.0977993	0.655707	['[OH2][La]']	['[O-]C=O', '[O]S(=O)(=O)[O]']	52	3.41222	Polar	equal	Converged
DOLDUE_FSR	['12']	[48]	[2]	[2, 2]	[48 48]	vasp	[2.762]	0.0541	0.13971	0.06028	0	-0.43575	0	-0.03352	-0.01487	0.00227	0.32529	0	0	-0.23769	0.37317	-0.40555	0	0	0	0.601446	mm2	C16-Cd2-H16-N24	0.487726	0.46436	['[Cd]']	['[N]1N[C](N=C1)n1cnnc1']	58	2.32624	Polar	equal	Converged
ODEWEA_FSR	['14']	[82]	[2]	[2]	[82]	vasp	[2.583]	0	-1e-05	-2e-05	0.43906	-1e-05	0.26458	0.09144	0.04618	0.0325	0	0.0154	0	3e-05	5e-05	3e-05	0.22819	-3e-05	0.11717	0.573003	2	C18-H20-N2-O4-Pb1	0.15133	0.532953			45	2.08578	Polar	equal	Converged
KUBCIU_FSR	['11']	[29]	[2]	[2, 2]	[29 29]	vasp	[1.937]	-0.08477	-0.24577	-0.00604	0	-0.03124	0	-9e-05	7e-05	-0.00016	-0.06267	2e-05	-0.0815	0.1709	0.4502	0.05029	0	0.0959	0	0.558137	m	C20-Cu2-H14-N10-S4	0.114339	0.494065			50	1.79194	Polar	equal	Converged
TISLAJ_FSR	['12']	[30]	[2]	[2, 2, 2, 2, 2, 2, 2, 2]	[30 30 30 30 30 30 30 30]	vasp	[2.431]	-1e-05	-1e-05	0	0	0.16066	0	2e-05	2e-05	2e-05	0.03112	0	0	0.22015	0.18665	0.4573	0	0	0	0.540766	mm2	Zn8-H16-C24-N24-O16	0.06902	0.555511	['[Zn]']	['C1=N[N]C=N1', '[N]1C=NN=C1', '[O-]C(=O)C(=O)[O-]']	88	2.33657	Polar	equal	Converged
CEPGEJ_FSR	['11']	[29]	[1]	[1, 1, 1, 1]	[29 29 29 29]	vasp	[0.574]	-0.00894	-0.00782	-0.01014	0	0.03362	0	-0.00164	-0.00174	-0.00149	0.00352	0	0	0.35496	0.24592	0.30499	0	0	0	0.528905	mm2	C40-Cu4-H40-I4-N16	0.05622	0.529564			104	2.2033	Polar	equal	Converged
CUGSUT_FSR	['2']	[38]	[2]	[2, 2]	[38 38]	vasp	[2.595]	-3e-05	-3e-05	-8e-05	0.02439	-1e-05	-0.12093	0.13785	-0.03579	0.50285	0	0.06819	0	-6e-05	-8e-05	-0.00016	-0.12196	-5e-05	-0.00218	0.527059	2	Sr2-H12-C8-O14	0.100747	0.493872	['[OH2][Sr]']	['OC(C(C(=O)[O-])O)C(=O)[O-]']	36	2.30064	Polar	equal	Converged
XASVET_FSR	['13']	[81]	[1]	[1, 1, 1, 1]	[81 81 81 81]	vasp	[1.711]	7e-05	-8e-05	-7e-05	0.04302	4e-05	-0.11488	-0.25868	-0.30087	0.31532	0	0.14285	0	-7e-05	-7e-05	-8e-05	-0.03873	-1e-05	0.01583	0.526565	2	Tl4-H8-C16-O8	0.123521	0.607195			36	3.86204	Polar	equal	Converged
SIMZOD02_FSR	['1']	[3]	[1]	[1]	[3]	vasp	[1.218]	-0.25478	-0.17133	0.01732	0.03068	-0.04144	0.17004	0.16203	0.08054	-0.13758	-0.11796	0.03467	-0.15453	-0.15467	-0.22241	-0.32192	-0.19059	0.06233	0.09304	0.52618	1	Li1-H5-C5-N2-O5	0.272657	0.611934	['[Li][OH2]']	['O=c1[nH]c(=O)[nH]c(c1)C(=O)[O-]']	18	1.74973	Polar	equal	Converged
ELENEP_FSR	['11']	[29]	[2]	[2, 2]	[29 29]	vasp	[1.443]	-0.09191	0.00767	-0.05121	-0.05984	0.00346	0.03668	0.22096	0.20761	0.26016	0.03708	-0.06989	0.00549	-0.15411	-0.09862	-0.25787	-0.03151	0.04391	0.00707	0.521501	1	Cu2-H26-C16-N6-O8	0.0760016	0.533356	['[Cu]']	['NC(=O)CCC(C(=O)[O-])[N]C(=O)C(N)C']	58	1.64268	Polar	equal	Converged
FIRXIP_FSR	['12']	[48]	[2]	[2, 2]	[48 48]	vasp	[2.423]	2e-05	0.0001	0	-0.07586	-2e-05	-0.07329	-0.14195	-0.49789	0.01801	0	-0.04995	0	0	-9e-05	-5e-05	-0.04342	0	-0.13997	0.520446	2	Cd2-H20-C8-O18	0.12727	0.445417			48	2.49079	Polar	equal	Converged
GEMXUU01_FSR	['10']	[28]	[2]	[2, 2, 2, 2]	[28 28 28 28]	vasp	[1.716]	8e-05	-4e-05	8e-05	0	-0.02048	0	0	0	0	0.18726	0	0	0.34268	0.37897	0.09621	0	0	0	0.519908	mm2	Ni4-H28-C12-N4-Cl8-O8	0.0448096	0.538058	['Cl[Ni]Cl']	['[O-]C(=O)CC[NH3]']	64	2.25606	Polar	equal	Converged
DEGJUW_FSR	['11']	[29]	[1]	[1, 1, 1, 1]	[29 29 29 29]	vasp	[0.842]	0.1347	0.14742	0.23401	0	0.10745	0	-0.00273	0.00022	-0.00273	0.06474	-0.0011	0.02169	0.19455	0.18529	0.258	0	0.15202	0	0.516917	m	C12-Cu4-H10-I4-N10	0.121196	0.520493			40	3.3914	Polar	equal	Converged
HEWWAK_FSR	['12']	[48]	[2]	[2, 2, 2, 2]	[48 48 48 48]	vasp	[2.383]	-0.00011	0.00229	0.00025	0	-0.06618	0	0.00146	0.00342	0.00038	-0.11403	0	0	-0.06381	0.01577	-0.51107	0	0	0	0.51528	mm2	C32-Cd4-H16-N16-O16	0.06987	0.502676	['[Cd]']	['OC(=O)C1=C(N=C([N]1)c1nc[nH]c1)C(=O)[O-]']	84	2.30472	Polar	equal	Converged
UNISEQ02_FSR	['1']	[3]	[1]	[1, 1, 1, 1]	[3 3 3 3]	vasp	[1.117]	-0.43779	-0.22396	-0.03965	0	0.05668	0	3e-05	-2e-05	8e-05	0.02751	7e-05	-0.11476	0.08996	-0.02734	-0.02135	0	0.09697	0	0.499739	m	C8-H8-Li4-O12	0.066885	0.504871			32	1.8302	Polar	equal	Converged
WUVGOL_FSR	['12']	[48]	[2]	[2, 2, 2, 2, 2, 2]	[48 48 48 48 48 48]	vasp	[2.483]	0.03192	0.20238	-0.03082	0	-0.06279	0	-0.00027	-0.00019	0	-0.42689	0.00021	-0.24311	0.16831	0.07227	0.00571	0	-0.07635	0	0.491261	m	Cd6-H16-C30-N12-O26	0.102698	0.459785	['[Cd]', '[OH2][Cd]']	['[O-]C(=O)C1=NN=C([CH]1)C(=O)[O-]', '[O-]C(=O)C1=N[N]C(=C1)C(=O)[O-]', '[O-]C(=O)c1[n-][nH]c(c1)C(=O)O', '[O-]C(=O)c1[nH][n-]c(c1)C(=O)[O-]']	90	2.00636	Polar	equal	Converged
IXUWUV_FSR	['2']	[56]	[2]	[2, 2]	[56 56]	vasp	[2.991]	0.12842	-0.0385	0.12099	0	0.0085	0	0	-1e-05	-1e-05	-0.01926	-1e-05	-0.05672	0.07713	-0.03438	-0.4619	0	0.03704	0	0.481386	m	Ba2-C16-H18-N6-O10	0.119608	0.409185	['[Ba]']	['O=CN(C)C', '[O-]C(=O)c1[nH]cnc1C(=O)[O-]']	52	2.19065	Polar	equal	Converged
IJECUV_FSR	['1']	[3]	[1]	[1, 1]	[3 3]	vasp	[1.185]	0.03581	0.03791	0.00303	0.02602	0.06821	-0.0798	-0.18218	0.42244	-0.00674	-0.04952	0.08511	-0.01471	0.02764	-0.07617	0.00569	0.02016	0.0206	-0.0576	0.477924	1	Li2-H16-C10-N2-O8	0.138968	0.43317	['[Li]']	['[O-]C(=O)CCC(C(=O)[O-])[NH3]']	38	1.6196	Polar	equal	Converged
LONSIQ_FSR	['6']	[74]	[6]	[6, 6]	[74 74]	vasp	[5.541]	-0.43824	-0.12515	0.08287	0	0.02033	0	0	-1e-05	1e-05	-0.03364	1e-05	-0.37271	0.05785	0.10955	0.06123	0	-0.18941	0	0.472751	m	C20-H16-N4-O6-W2	0.17196	0.440878	['[O]', '[W]']		48	2.66466	Polar	equal	Converged
RIWGEJ_FSR	['2']	[20]	[2]	[2, 2]	[20 20]	vasp	[2.48]	-7e-05	-4e-05	2e-05	-0.00788	-2e-05	-0.19896	0.04201	-0.4568	0.04462	0	0.0326	0	-1e-05	-4e-05	-3e-05	0.06994	-2e-05	0.02436	0.462044	2	Ca2-P2-H26-C6-O22	0.0843519	0.492896	['[OH2][Ca]([OH2])([OH2])[OH2]']	['[O-]C(=O)C(COP(=O)(O)[O])O', '[O-]C(=O)C(COP(=O)([O])O)O']	58	1.85642	Polar	equal	Converged
ISUJEL_FSR	['11']	[29]	[1]	[1, 1]	[29 29]	vasp	[0.455]	0	0	0	-0.03985	0	0.01446	0.10951	0.40772	0.17475	0	0.00689	0	0	0	0	0.12404	0	-0.04403	0.456961	2	Cu2-H8-C10-S2-N6	0.0622193	0.426717	['[Cu]']	['[S]C#N']	28	2.08887	Polar	equal	Converged
EMUDAT_FSR	['fblock', '2']	[57, 38]	[3, 2]	[3, 3, 3, 3, 2, 2]	[57 57 57 57 38 38]	vasp	[4.077, 2.653]	3e-05	0	1e-05	0.07363	0	0	0	3e-05	2e-05	0	0.07361	0	-1e-05	-1e-05	-1e-05	0	0	0.44534	0.44534	-42m	C56-H40-La4-N8-O40-Sr2	0.05266	0.498	['[OH2][La][OH2]', '[Sr]']	['[O-]C(=O)c1cccc(n1)C(=O)[O-]']	150	1.9512	Non-polar	equal	Converged
KULCAX_FSR	['11']	[29]	[2]	[2, 2]	[29 29]	vasp	[1.521]	0.4153	0.00566	0.09258	0	-0.06886	0	8e-05	-5e-05	-1e-05	0.1156	3e-05	0.00167	-0.06441	-0.12877	-0.09782	0	0.08077	0	0.443723	m	C12-Cu2-H20-N4-O8	0.222373	0.611799			46	2.02134	Polar	equal	Converged
RISBUT_FSR	['12', '5']	[48, 23]	[2, 4]	[2, 2, 4, 4]	[48 48 23 23]	vasp	[2.414, 4.437]	-0.00464	-0.01998	0.00696	0	0.0148	0	-0.00017	0.00027	0.00012	0.00705	-0.0001	0.00096	0.03748	0.04411	0.43742	0	-0.02076	0	0.441738	m	C24-Cd2-H28-O18-P4-V2	0.093116	0.39756	['[OH2][Cd][OH2]', '[O]', '[V]']	['[O]P(=O)(c1ccccc1)[O]']	78	2.05814	Polar	equal	Converged
BINSID_FSR	['1']	[11]	[1]	[1, 1]	[11 11]	vasp	[1.256]	-0.12287	-0.16446	-0.18721	0	-0.10666	0	4e-05	-0.00087	-0.00076	-0.03775	-0.00014	-0.05852	0.08408	0.20581	0.22029	0	0.09071	0	0.439179	m	C8-H10-N16-Na2-O2	0.0582654	0.441312			38	1.7102	Polar	equal	Converged
DEJGOP_FSR	['11']	[29]	[2]	[2, 2, 1, 1]	[29 29 29 29]	vasp	[0.443]	9e-05	-4e-05	-0.00021	0.02792	-1e-05	-0.00206	-0.23115	-0.27002	-0.24935	0	-0.02857	0	-0.0001	-6e-05	-6e-05	-0.03221	-8e-05	-0.02599	0.435124	2	Cu4-H24-C40-S2-N16	0.125632	0.317744	['[Cu]']	['[C]#N', '[S]C#N', 'c1ccc(nc1)C1=NC(=[N]=C([N]1)c1ccccn1)c1ccccn1']	86	1.82527	Polar	equal	Converged
EBOYOK_FSR	['14']	[50]	[4]	[4, 4, 4, 4]	[50 50 50 50]	vasp	[2.964]	-1e-05	-1e-05	-5e-05	0	0.00729	0	0.00224	-0.00255	-0.00367	0.02714	0	0	-0.00828	-0.01002	0.43	0	0	0	0.430212	mm2	C16-H24-N8-S12-Sn4	0.0935875	0.518565	['[Sn]']	['S=C1N=NC(=S)S1']	64	1.93366	Polar	equal	Converged
TAKSAZ_FSR	['13']	[81]	[1]	[1, 1]	[81 81]	vasp	[1.651]	0.09757	0.22932	0.18298	0	-0.01678	0	0	0	0	0.00248	0	-0.09152	-0.23139	-0.20565	-0.08382	0	-0.04427	0	0.429877	m	Tl2-H10-C6-N4-O8	0.174758	0.539743			30	3.4887	Polar	equal	Converged
PABRIU_FSR	['12']	[30]	[2]	[2, 2]	[30 30]	vasp	[2.203]	0.00031	0	0.00014	0	-0.2473	0	9e-05	9e-05	6e-05	0.0532	0	0	-0.40614	0.03464	-0.13338	0	0	0	0.428882	mm2	C24-H16-N4-O8-Zn2	0.0719091	0.435015	['[Zn]']	['[O-]C(=O)c1cccnc1']	54	1.78408	Polar	equal	Converged
VAXVAT_FSR	['1', '6']	[11, 42]	[1, 5]	[1, 5, 5]	[11 42 42]	vasp	[1.354, 2.461]	0.13777	-0.22405	-0.02877	-0.00716	0.1215	0.26621	-0.00232	0.17517	0.03883	-0.02876	-0.03189	0.00808	-0.03485	-0.06629	-0.00492	0.1909	0.08725	0.04027	0.422364	1	Na1-Mo2-H22-C14-N3-O15	0.105169	0.423854	['[Na]O[Mo]12O[Mo]2(O1)[O]']	['[O-]C(=O)CN(CCN(CC(=O)O)CC(=O)O)CCN(CC(=O)[O-])CC(=O)[O-]']	57	1.98618	Polar	equal	Converged
MAFBAX_FSR	['6', '10']	[24, 28]	[6, 2]	[6, 6, 6, 6, 2, 2]	[24 24 24 24 28 28]	vasp	[2.795, 0.426]	0.0001	7e-05	-0.00015	0.02686	-0.00025	0.0808	0.20075	0.06115	0.01411	0	0.08871	0	-0.00012	-3e-05	-0.0001	-0.24194	2e-05	0.34124	0.421411	2	Cr4-Ni2-H32-C24-N8-O14	0.112331	0.445129			84	2.01616	Polar	equal	Converged
LASMUP_FSR	['12']	[30]	[2]	[2, 2]	[30 30]	vasp	[2.462]	-0.23877	-0.00986	-0.03921	0	-0.11762	0	1e-05	0	0	0.01117	0	0.06391	-0.28707	-0.06043	-0.1915	0	0.14318	0	0.421122	m	C20-H14-N6-O10-Zn2	0.155569	0.488177	['[OH2][Zn]']	['[O-]C(=O)c1cc(cc(c1)n1cnnc1)C(=O)[O-]']	52	2.04977	Polar	equal	Converged
LIKREE_FSR	['2']	[56]	[2]	[2]	[56]	vasp	[2.694]	0.00023	5e-05	-0.0002	0.02246	-8e-05	0.01247	0.17011	0.0598	0.35288	0	0.13173	0	-4e-05	-4e-05	-3e-05	0.03632	1e-05	0.07185	0.417601	2	Ba1-C12-H18-N8-O10	0.147308	0.480689			49	2.01598	Polar	equal	Converged
MEHPAQ_FSR	['11']	[29]	[2]	[2, 2, 2, 2]	[29 29 29 29]	vasp	[1.548]	9e-05	-0.0001	-5e-05	-0.41555	0	0	-1e-05	-3e-05	-1e-05	0	-0.04733	0	-1e-05	-1e-05	-1e-05	0	0	-0.01477	0.41555	222	Cu4-H36-C20-N4-O20	0.07774	0.43264	['[OH2][Cu]']	['[O-]C(=O)CCC(C(=O)[O-])N']	84	1.915	Non-polar	equal	Converged
UBUQAM_FSR	['1']	[11]	[1]	[1, 1]	[11 11]	vasp	[1.136]	-3e-05	5e-05	4e-05	-0.04771	-4e-05	0.01696	-0.2428	-0.30837	0.02304	0	0.12735	0	0	-7e-05	-4e-05	-0.07763	4e-05	0.00701	0.413271	2	Na2-H20-C10-Cl2-O10	0.107776	0.48495	['[Na]']	['OC1COC(C(C1O)O)O']	44	1.7894	Polar	equal	Converged
KIVYIY_FSR	['2']	[56]	[2]	[2, 2]	[56 56]	vasp	[2.858]	-0.39095	-0.03461	0.00533	0	-0.04562	0	0.00027	-2e-05	2e-05	-0.01239	8e-05	-0.10241	-0.10018	0.01455	0.16484	0	-0.03772	0	0.41135	m	Ba2-C16-H30-N2-O24	0.232675	0.604878	['[OH2][Ba]([OH2])([OH2])([OH2])([OH2])[OH2]']	['[O-]C(=O)c1cc(cc(c1)N(=O)=O)C(=O)[O-]']	74	2.11979	Polar	equal	Converged
RURDEP_FSR	['fblock']	[57]	[3]	[3, 3, 3, 3]	[57 57 57 57]	vasp	[4.112]	-0.09995	-0.14502	-0.04031	0	-0.00811	0	-0.00014	-7e-05	-6e-05	-0.12852	0	-0.0777	-0.10718	-0.24219	-0.26605	0	-0.06051	0	0.410546	m	B10-C8-H14-La4-O28	0.354168	0.50421	['[La]']	['O=[B]1O[B]23OB4O[B](O2)(O[B](O1)(O3)OB1O[B]2(O[B]3(O4)O[B](=O)O[B](O1)(O3)O2)O)O', '[O-]C(=O)C']	64	2.85669	Polar	equal	Converged
GIWKON_FSR	['11']	[29]	[1]	[1, 1, 1, 1]	[29 29 29 29]	vasp	[0.56]	-7e-05	-5e-05	-4e-05	0.02996	-0.00016	0.00034	0.2887	0.05167	0.24902	0	-0.14217	0	-4e-05	2e-05	-3e-05	0.00342	7e-05	-0.00063	0.410172	2	Cu4-H14-C18-S4-N14	0.109708	0.426691	['[Cu][Cu]']	['Nc1cccc(n1)n1cnnc1', '[S]C#N']	54	2.17858	Polar	equal	Converged
SOWTIJ_FSR	['9']	[27]	[2]	[2, 2, 2, 2]	[27 27 27 27]	vasp	[2.028]	0	1e-05	0	0	-0.11773	0	0.00014	0.00025	-4e-05	0.00752	0	0	0.11656	0.00142	0.39038	0	0	0	0.407412	mm2	Co4-H12-C28-N4-O16	0.107903	0.451971	['[Co]']	['[O-]C(=O)c1cnccc1C(=O)[O-]']	64	2.08629	Polar	equal	Converged
DULVEM_FSR	['2']	[12]	[2]	[2, 2]	[12 12]	vasp	[2.359]	-0.34819	-0.19349	-0.06229	0	0.01636	0	1e-05	-0.0001	-3e-05	-0.03352	2e-05	-0.25047	-0.02138	-0.06385	0.19631	0	-0.08253	0	0.403936	m	C18-H16-Mg2-N4-O12	0.113139	0.406366	['[OH2][Mg][OH2]']	['[O-]C(=O)c1cc2[nH]cnc2cc1C(=O)[O-]']	52	1.72628	Polar	equal	Converged
SOCCUI01_FSR	['7']	[25]	[2]	[2, 2]	[25 25]	vasp	[2.627]	-0.07155	-0.20539	-0.0053	0	0.01684	0	-0.00014	0	0.00018	0.02003	0.00033	-0.02921	-0.16626	0.08841	-0.35161	0	-0.02279	0	0.399764	m	C20-Cl6-H16-Mn2-N4	0.0600692	0.439247			48	1.78557	Polar	equal	Converged
UHOYIZ_FSR	['12']	[48]	[2]	[2, 2, 2, 2]	[48 48 48 48]	vasp	[1.846]	1e-05	-1e-05	1e-05	0	-0.01966	0	0.00014	4e-05	4e-05	0.0391	0	0	-0.02185	0.05483	-0.39378	0	0	0	0.398179	mm2	C6-Cd4-H20-N4-Se4	0.265006	0.618338	['[Cd]', '[Se]']	['NCCCN']	38	3.19559	Polar	equal	Converged
XEJVEP_FSR	['2']	[38]	[2]	[2, 2]	[38 38]	vasp	[2.809]	-0.01284	0.063	0.14853	0	0.07406	0	-0.00054	0.00061	-0.00103	0.1569	5e-05	-0.10096	0.02141	0.22144	-0.31357	0	-0.01055	0	0.396215	m	C20-H16-N8-O18-Sr2	0.0927423	0.317357	['[OH2][Sr]']	['[O-]C(=O)C1=C(N[CH]N1)C(=O)[O-]', '[O-]C(=O)c1nc[nH]c1C(=O)O']	64	2.08199	Polar	equal	Converged
ACUFOU_FSR	['1']	[19]	[1]	[1, 1]	[19 19]	vasp	[1.356]	0.05865	0.15964	0.15704	0	0.13329	0	-0.00014	0.00011	-0.0002	0.36306	-0.00015	0.15482	0.08913	-0.06343	0.20322	0	0.1318	0	0.394692	m	C20-H14-K2-N8-O16	0.098049	0.430176	['[K]']	['[O-]C(=O)c1c[nH]c(=O)[nH]c1=O.OC(=O)c1c[nH]c(=O)[nH]c1=O']	60	1.83895	Polar	equal	Converged
FAMHEI_FSR	['9']	[27]	[2]	[2, 2]	[27 27]	vasp	[1.285]	0	0	0	-0.15273	0	-0.03272	0.36652	0.07971	-0.03415	0	-0.10572	0	-1e-05	0	0	0.04514	0	-0.07478	0.391195	2	Co2-H18-C10-S2-N2-O12	0.13223	0.441408	['[OH2][Co]']	['[O-]C(=O)C1SCC(N1)C(=O)[O-]']	46	1.9856	Polar	equal	Converged
EWAWEG01_FSR	['12']	[80]	[2]	[2, 2]	[80 80]	vasp	[2.354]	0	-1e-05	-6e-05	0	0.00012	0.11696	0.26746	0.00965	0.2789	0	-0.00026	0	6e-05	3e-05	3e-05	0.061	0	0.00067	0.38654	2	Hg2-H4-C2-N10-Cl2	0.319894	0.426441	['Cl[Hg]']	['NC1=NN=N[N]1']	20	3.91857	Polar	equal	Converged
NASCAN_FSR	['12']	[30]	[2]	[2, 2, 2, 2]	[30 30 30 30]	vasp	[1.737]	-3e-05	-1e-05	0	0	0.03008	0	9e-05	3e-05	3e-05	0.00118	0	0	0.08006	-0.00914	0.37454	0	0	0	0.38311	mm2	C6-H20-N4-S4-Zn4	0.271205	0.582307	['[S]', '[Zn]']	['NCCCN']	38	2.3356	Polar	equal	Converged
UGENUP_FSR	['11']	[29]	[1]	[1, 1]	[29 29]	vasp	[0.251]	0	1e-05	0	0	-0.03225	0	-0.00016	0.00013	-0.0003	-0.37903	0	0	0.04021	0.1142	-0.01339	0	0	0	0.37903	mm2	C28-Cu2-H18-N12-S2	0.31324	0.113483	['[Cu]']	['[S]C#N', 'n1ccc(cc1)C1=[N]=C(N=C[N]1)c1ccncc1']	62	1.78685	Polar	equal	Converged
IVAZUA01_FSR	['12']	[30]	[2]	[2, 2, 2, 2]	[30 30 30 30]	vasp	[2.418]	-1e-05	0	0	0	-0.10165	0	0.00011	0	-2e-05	0.02561	0	0	0.04973	-0.01565	0.37386	0	0	0	0.377478	mm2	Zn4-H12-C28-N4-O16	0.227526	0.590752	['[Zn]']	['[O-]C(=O)c1cnccc1C(=O)[O-]']	64	2.11826	Polar	equal	Converged
HOYMEP_FSR	['12']	[80]	[2]	[2, 2, 2, 2]	[80 80 80 80]	vasp	[2.116]	-0.00011	-0.00018	0.00014	0	-0.02916	0	-0.00044	-0.00065	-2e-05	-0.06634	0	0	0.19055	0.31854	0.0639	0	0	0	0.376644	mm2	C48-F4-H36-Hg4-I8-N8	0.08676	0.419943			108	2.93065	Polar	equal	Converged
FAVNEY_FSR	['12']	[30]	[2]	[2, 2]	[30 30]	vasp	[2.23]	-0.19802	-0.06969	-0.15145	0	0.03777	0	-3e-05	-5e-05	-0.00012	-0.02956	-9e-05	-0.20969	0.25884	0.11408	0.03226	0	0.06622	0	0.372974	m	Zn2-P2-H8-C12-N2-O10	0.246612	0.478986	['[Zn]']	['[O-]C(=O)C1=CN[CH]C(=C1)P(=O)([O])[O]']	36	2.13478	Polar	equal	Converged
AGUTEC_FSR	['12', '11']	[48, 29]	[2, 2]	[2, 2, 2, 2]	[48 48 29 29]	vasp	[1.952, 1.697]	0.0315	-0.26592	-0.10975	0	-0.00451	0	-0.00163	0.00129	0.00369	0.304	-0.00033	-0.20977	-0.10068	-0.05218	0.19742	0	0.03738	0	0.369407	m	Br8-C16-Cd2-Cu2-H28-N24-O6	0.0939456	0.390148	['[OH2][Cu]']	['n1ncn(c1)n1cnnc1']	86	2.28197	Polar	equal	Converged
AGUTEC_FSR	['12', '11']	[48, 29]	[2, 2]	[2, 2, 2, 2]	[48 48 29 29]	vasp	[1.952, 1.698]	0.0315	-0.26592	-0.10975	0	-0.00451	0	-0.00163	0.00129	0.00369	0.304	-0.00033	-0.20977	-0.10068	-0.05218	0.19742	0	0.03738	0	0.369407	m	Br8-C16-Cd2-Cu2-H28-N24-O6	0.0939456	0.390148	['[OH2][Cu]']	['n1ncn(c1)n1cnnc1']	86	2.28197	Polar	equal	Converged
EFUKIA_FSR	['12']	[30]	[2]	[2, 2, 2, 2]	[30 30 30 30]	vasp	[2.058]	-0.00015	0.00022	1e-05	-0.00016	0.17452	0.22761	0.22769	-0.22753	2e-05	0.17459	0	0	-0.03719	-0.03719	0.12003	0	0	0	0.366189	3m	C9-H6-N12-S4-Zn4	0.136363	0.496004	['[Zn]S([Zn])([Zn])[Zn]']	['C1=N[N]C=N1', '[N]1=CN=NC=1']	35	2.3703	Polar	equal	Converged
XUNJUM_FSR	['7']	[25]	[2]	[2, 2]	[25 25]	vasp	[2.122]	-0.06914	-0.026	-0.03518	0	-0.03307	0	0.00094	0.00124	-0.00034	-0.02089	0.00027	0.01853	-0.2709	-0.07145	-0.10107	0	-0.1893	0	0.363298	m	C24-H28-Mn2-O8	0.0878178	0.34462	['[Mn]']	['[O-]C(=O)C12CC3CC(C1)CC(C2)(C3)C(=O)[O-]']	62	1.6814	Polar	equal	Converged
MICDOR_FSR	['7']	[25]	[2]	[2, 2, 2, 2]	[25 25 25 25]	vasp	[1.692]	-4e-05	-1e-05	0	0	-0.01584	0	0.00017	3e-05	0	0.03053	0	0	-0.01273	0.02939	-0.36075	0	0	0	0.362169	mm2	C6-H20-Mn4-N4-Se4	0.292173	0.603718	['[Mn]', '[Se]']	['NCCCN']	38	2.59689	Polar	equal	Converged
OREMUU_FSR	['11']	[29]	[1]	[1, 1]	[29 29]	vasp	[0.301]	0.04233	0.06469	0.07459	0	0.01666	0	-3e-05	-4e-05	1e-05	0.03119	1e-05	0.03775	0.17539	0.23791	0.17759	0	0.0153	0	0.360928	m	C12-Cl2-Cu2-H8-N4	0.147707	0.261482	['[Cu]']	['[C]#N']	28	1.91038	Polar	equal	Converged
RAHKAO_FSR	['15']	[51]	[3]	[3]	[51 51]	vasp	[3.713]	4e-05	-4e-05	0	-0.00069	-2e-05	0.01277	0.31842	0.1161	0.09866	0	0.0515	0	0.00011	6e-05	6e-05	0.00576	9e-05	0.01529	0.35673	2	Sb2-H22-C18-N2-O4-F6	0.118596	0.404057			54	2.06729	Polar	equal	Converged
RIGROR_FSR	['11']	[29]	[2]	[2, 2]	[29 29]	vasp	[1.389]	0.06019	0.22081	0.25807	-0.02159	0.06439	-0.00643	-0.0379	0.02652	0.03119	-0.01321	0.02649	-0.03559	-0.01714	0.03699	0.006	-0.02501	0.01942	-0.0183	0.355241	1	Cu2-H38-C34-N18	0.0830977	0.362208	['[Cu]']	['[N][N][N]']	92	1.58144	Polar	equal	Converged
JOYZEE_FSR	['12']	[30]	[2]	[2, 2]	[30 30]	vasp	[2.251]	1e-05	0	0	0.01225	0	-0.10805	-0.14476	-0.29798	-0.09589	0	0.085	0	0	0	0	0.05406	0	0.05054	0.355201	2	Zn2-H16-C12-N4-O10	0.165338	0.368089			44	2.06559	Polar	equal	Converged
HAYPEC_FSR	['15']	[83]	[3]	[3, 3]	[83 83]	vasp	[4.527]	0.12597	0.24976	-0.00525	0	-0.18791	0	-2e-05	-2e-05	0	-0.14619	0.00013	0.01644	-0.08572	0.14755	0.01357	0	-0.03885	0	0.35399	m	Bi2-C20-H26-N4-O16	0.138956	0.353851			68	2.32984	Polar	equal	Converged
LAYZIW_FSR	['2']	[12]	[2]	[2, 2, 2, 2]	[12 12 12 12]	vasp	[2.3]	2e-05	9e-05	7e-05	0	-0.08342	0	0.00011	0.00015	3e-05	-0.22315	0	0	0.18082	-0.29418	-0.06504	0	0	0	0.35138	mm2	Mg4-H24-C12-N16-O16	0.0467989	0.313718	['[OH2][Mg][OH2]']	['[O-]C(=O)CC1=NN=N[N]1']	72	1.91479	Polar	equal	Converged
EHIWAU_FSR	['12']	[80]	[2]	[2, 2]	[80 80]	vasp	[2.175]	-0.25283	-0.02459	-0.09073	0.04405	-0.05091	0.06472	0.01421	0.12098	0.1067	-0.00028	-0.0085	-0.03852	-0.09809	-0.00658	-0.19425	0.02227	-0.03872	-0.00277	0.34914	1	Hg2-H19-C20-N7-Cl4-O1	0.0972181	0.300512			53	2.48214	Polar	equal	Converged
ACRNCU_FSR	['11']	[29]	[1]	[1, 1, 1, 1, 1, 1, 1, 1]	[29 29 29 29 29 29 29 29]	vasp	[0.818]	-5e-05	5e-05	1e-05	0	0.14391	0	6e-05	4e-05	6e-05	0.01381	0	0	0.08828	0.1689	0.28809	0	0	0	0.345422	mm2	Cu8-H12-C12-N4-Cl8	0.297971	0.633113			44	2.82395	Polar	equal	Converged
NEBQES_FSR	['2']	[56]	[2]	[2, 2, 2, 2]	[56 56 56 56]	vasp	[2.958]	0	-1e-05	0	0	0.01247	0	1e-05	1e-05	0	0.32036	0	0	0.05182	0.28829	0.17767	0	0	0	0.342583	mm2	Ba4-H40-C48-N16-O40	0.0549185	0.348694	['[Ba]']	['OCc1[nH]c(c(n1)C(=O)O)C(=O)[O-]', 'OCc1[nH]c(c(n1)C(=O)[O-])C(=O)O']	148	2.2252	Polar	equal	Converged
OFIXOR_FSR	['12']	[30]	[2]	[2, 2, 2, 2]	[30 30 30 30]	vasp	[2.128]	0	-1e-05	0	0	-0.00204	0	-2e-05	-3e-05	1e-05	0.08574	0	0	0.12485	0.08751	0.3061	0	0	0	0.341969	mm2	Zn4-H28-C40-N4-O12	0.152973	0.449866	['[OH]', '[Zn]']	['[O-]C(=O)c1ccc2c(c1)cccn2']	88	1.73948	Polar	equal	Converged
EBANAZ_FSR	['1']	[19]	[1]	[1, 1]	[19 19]	vasp	[1.374]	0.10345	0.08691	-0.06708	0	0.14437	0	-9e-05	-8e-05	-0.00022	0.0978	6e-05	0.02396	0.10515	0.23574	0.20994	0	-0.074	0	0.341725	m	K2-H8-C18-O12-F2	0.0650156	0.340123			42	1.80839	Polar	equal	Converged
EGISEU_FSR	['2']	[20]	[2]	[2, 2]	[20 20]	vasp	[2.505]	-0.23058	0.03311	-0.06606	0	0.22107	0	0.00011	0.00034	-4e-05	-0.03954	-8e-05	-0.02805	0.08272	-0.04591	-0.0193	0	-0.05245	0	0.341524	m	C12-Ca2-H18-N18-O12	0.0779953	0.3016	['[OH2][Ca][OH2]']	['[O-]C(=O)CN1[N]N=C([N]1)Nc1nnnn1CC(=O)[O-]']	62	1.69726	Polar	equal	Converged
HEJCOR_FSR	['11']	[29]	[2]	[2, 2]	[29 29]	vasp	[1.919]	0.17064	0.20599	0.20135	0	0.00133	0	-1e-05	-3e-05	1e-05	0.02414	1e-05	-0.02344	0.05633	0.00877	0.03786	0	-0.00033	0	0.33966	m	C56-Cu2-H40-N4-O8	0.0583486	0.349587	['[Cu]']	['[O-]C(=O)c1ccc(cc1)C=Cc1ccncc1']	110	1.23649	Polar	equal	Converged
MEHRIA_FSR	['12']	[30]	[2]	[2]	[30]	vasp	[1.971]	-0.17538	-0.07464	-0.14702	0.05266	-0.02859	0.18892	0.13544	0.09002	0.02513	0.03381	0.0208	-0.00225	-0.03332	0.02516	0.0037	0.02461	-0.01411	0.03856	0.334922	1	Zn1-H9-C4-S4-N9-O4	0.334766	0.384555			31	1.99545	Polar	equal	Converged
AHIJOQ01_FSR	['14']	[82]	[2]	[2, 2, 2, 2]	[82 82 82 82]	vasp	[3.353]	0.0002	0.00014	8e-05	0.04449	0	0	-0.00025	-9e-05	-0.00014	0	-0.06725	0	4e-05	-1e-05	0.00016	0	0	0.33433	0.33433	222	H16-Pb4-C16-O24	0.0655	0.2869	['[Pb]']	['OC(C(C(=O)[O-])O)C(=O)[O-]']	60	3.97281	Non-polar	equal	Converged
SIWFOT_FSR	['1']	[3]	[1]	[1, 1, 1, 1]	[3 3 3 3]	vasp	[1.084]	-3e-05	-1e-05	0	0	0.01709	0	0	0	0	-0.04223	0	0	-0.11196	-0.14404	0.28005	0	0	0	0.334231	mm2	Li4-H32-C16-S4-Cl4-O8	0.02639	0.341596	['[Li]']	['O=S1(=O)CCCC1']	68	1.63254	Polar	equal	Converged
HAWBOY_FSR	['11']	[29]	[2]	[2]	[29]	vasp	[1.41]	0.28684	0.0112	-0.00331	0.00026	-0.00411	-0.00848	0.08712	-0.04478	-0.10065	0.00038	0.0001	0.07557	0.12324	0.09665	-0.01492	-0.03512	0.10691	0.0435	0.332961	1	Cu1-H18-C16-N4-O4	0.126211	0.388491	['[Cu]']	['NC(C(=O)[O-])Cc1ccncc1']	43	1.60256	Polar	equal	Converged
QOBHIY_FSR	['12']	[30]	[2]	[2, 2, 2, 2]	[30 30 30 30]	vasp	[1.726]	0	0	1e-05	0	-0.03311	0	0.00015	2e-05	1e-05	-0.01043	0	0	-0.06876	0.00259	-0.32564	0	0	0	0.33283	mm2	C6-H20-N4-Te4-Zn4	0.240832	0.508084	['[Te]', '[Zn]']	['NCCCN']	38	3.1663	Polar	equal	Converged
AGUTEC_FSR	['12', '11']	[48, 29]	[2, 2]	[2, 2, 2, 2]	[48 48 29 29]	vasp	[1.952, 1.697]	0.02885	-0.25791	-0.10792	0	-0.00693	0	-0.00166	0.00114	0.00366	0.2725	-0.00037	-0.19011	-0.10805	-0.05921	0.19301	0	0.03512	0	0.332343	m	Br8-C16-Cd2-Cu2-H28-N24-O6	0.0939456	0.390148	['[OH2][Cu]']	['n1ncn(c1)n1cnnc1']	86	2.28197	Polar	equal	Converged
AGUTEC_FSR	['12', '11']	[48, 29]	[2, 2]	[2, 2, 2, 2]	[48 48 29 29]	vasp	[1.952, 1.698]	0.02885	-0.25791	-0.10792	0	-0.00693	0	-0.00166	0.00114	0.00366	0.2725	-0.00037	-0.19011	-0.10805	-0.05921	0.19301	0	0.03512	0	0.332343	m	Br8-C16-Cd2-Cu2-H28-N24-O6	0.0939456	0.390148	['[OH2][Cu]']	['n1ncn(c1)n1cnnc1']	86	2.28197	Polar	equal	Converged
ODIZOQ01_FSR	['9']	[27]	[2]	[2, 2]	[27 27]	vasp	[1.634]	0.14731	0.06017	0.16189	0	0.02694	0	0.00049	5e-05	-0.00032	-0.04699	-0.00013	-0.02326	0.12325	0.11185	0.14742	0	0.10724	0	0.329268	m	C32-Co2-H24-N4-O8	0.115134	0.273494	['[Co]']	['[O-]C(=O)C=Cc1ccncc1']	70	1.50445	Polar	equal	Converged
EGEQAJ_FSR	['14']	[50]	[2]	[2, 2]	[50 50]	vasp	[2.643]	-4e-05	6e-05	4e-05	-0.05665	1e-05	0.16733	0.24739	-0.10251	-0.15637	0	0.10969	0	-3e-05	1e-05	-7e-05	-0.04832	3e-05	-0.03694	0.328928	2	Sn2-P4-H28-C12-N4-O12	0.126568	0.337458	['[Sn]']	['[O]P(=O)(C[NH]1CC[NH](CC1)CP(=O)([O])[O])[O]']	62	2.36512	Polar	equal	Converged
KIHVOP_FSR	['12']	[30]	[2]	[2, 2, 2, 2]	[30 30 30 30]	vasp	[2.138]	0	0	0	0	0.0654	0	0	0	0	-0.01139	0	0	-0.04762	-0.01398	-0.32347	0	0	0	0.327255	mm2	Zn4-P4-H36-C24-N8-O12	0.09666	0.343103	['[Zn]']	['[O]P(=O)[O]']	88	1.9443	Polar	equal	Converged
EFOZIK_FSR	['1', '12']	[11, 30]	[1, 2]	[1, 1, 2, 2]	[11 11 30 30]	vasp	[1.331, 2.568]	0.00012	-8e-05	-0.00022	-0.00024	-0.08486	-0.01159	-0.01168	0.0117	-0.00012	-0.08453	0	0	0.00743	0.00743	-0.32512	0	0	0	0.32529	3m	C36-H24-N6-Na2-O18-Zn2	0.0663691	0.287362	['[Na]', '[Zn]']	['[O-]C(=O)c1ccc[nH]c1=O']	88	1.53909	Polar	equal	Converged
RURJOF_FSR	['fblock']	[57]	[3]	[3, 3, 3, 3]	[57 57 57 57]	vasp	[4.115]	-0.04405	-0.0196	-0.0603	0	0.09987	0	5e-05	0.00021	0.00025	-0.10677	5e-05	0.0069	-0.08873	-0.21441	-0.21712	0	-0.02442	0	0.324828	m	B10-C8-H14-La4-O28	0.350778	0.422581	['[La]']	['O=[B]1O[B]23OB4O[B](O2)(O[B](O1)(O3)OB1O[B]2(O[B]3(O4)O[B](=O)O[B](O1)(O3)O2)O)O', '[O-]C(=O)C']	64	2.81414	Polar	equal	Converged
PGALSB_FSR	['15']	[51]	[3]	[3]	[51 51]	vasp	[3.526]	1e-05	1e-05	1e-05	0	0.19935	0	6e-05	-0.00011	-5e-05	0.03145	0	0	0.06487	0.16079	0.27362	0	0	0	0.323928	mm2	C12-H6-O6-Sb2	0.17568	0.398522	['[Sb]']	['[O]c1c([O])cccc1[O]']	26	2.66508	Polar	equal	Converged
KEQTEF_FSR	['11']	[29]	[2]	[2, 2]	[29 29]	vasp	[1.747]	-1e-05	0	-1e-05	0	-0.13277	0	0	1e-05	0	-0.09652	0	0	-0.16386	-0.16168	-0.22642	0	0	0	0.322888	mm2	Cu2-H16-C16-O12	0.116709	0.253582	['[OH2][Cu][OH2]']	['[O-]C(=O)c1ccc(cc1)C(=O)[O-]']	46	2.01137	Polar	equal	Converged
YITPUM_FSR	['12']	[80]	[2]	[2, 2, 2, 2]	[80 80 80 80]	vasp	[1.815]	-2e-05	-1e-05	0	-0.02192	1e-05	-0.14207	-0.08063	0.28421	0.11769	0	0.05365	0	-1e-05	1e-05	-4e-05	0.24469	0	-0.17	0.322499	2	C11-Cl8-H22-Hg4-N2-O4	0.0556904	0.368286			51	3.19722	Polar	equal	Converged
LEQGUJ_FSR	['2']	[12]	[2]	[2, 2]	[12 12]	vasp	[2.176]	-0.26023	0.06322	-0.03049	0	0.00423	0	0.00015	-0.0001	-9e-05	0.01386	-0.0002	-0.06981	0.13156	-0.09686	-0.18112	0	-0.05769	0	0.321197	m	C12-H16-Mg2-N4-O14	0.0510111	0.309192	['[OH2][Mg]([OH2])[OH2]']	['[O-]C(=O)c1nccnc1C(=O)[O-]']	48	1.76426	Polar	equal	Converged
OFIYUY_FSR	['11']	[29]	[1]	[1, 1, 1, 1]	[29 29 29 29]	vasp	[0.651]	-0.09719	0.24873	0.03124	0	0.04975	0	-4e-05	-1e-05	-2e-05	-0.06229	2e-05	0.02412	0.08002	-0.13676	-0.05842	0	-0.03736	0	0.321005	m	Cu4-H8-C10-S2-N2-Cl2	0.160283	0.370543	['Cl[Cu][Cu]']	['[S]c1ccncc1']	28	2.68826	Polar	equal	Converged
REGLUM_FSR	['12']	[48]	[2]	[2, 2, 2, 2]	[48 48 48 48]	vasp	[2.436]	-0.00012	-5e-05	2e-05	-0.01193	-4e-05	0.15606	0.15605	0.25679	0.10804	0	0.01823	0	1e-05	2e-05	3e-05	0.02528	-4e-05	0.12344	0.31984	2	Cd4-H20-C16-O26	0.0947421	0.335626			66	2.36302	Polar	equal	Converged
UWEMEQ_FSR	['1']	[11]	[1]	[1, 1]	[11 11]	vasp	[1.164]	-0.05706	-0.00066	0.09444	0	-0.01421	0	-3e-05	-2e-05	8e-05	-0.00487	8e-05	-0.05225	0.24567	0.07571	0.18815	0	0.00113	0	0.31881	m	Na2-H12-C6-N18-O6	0.193371	0.393644			44	1.6271	Polar	equal	Converged
TACSIB_FSR	['12']	[30]	[2]	[2, 2, 2, 2]	[30 30 30 30]	vasp	[2.237]	6e-05	-1e-05	0	0	-0.16063	0	0	0	1e-05	-0.03143	0	0	-0.1945	0.24936	-0.03198	0	0	0	0.317857	mm2	Zn4-H28-C12-N4-Cl8-O8	0.0643911	0.365456	['Cl[Zn]Cl']	['[O-]C(=O)CC[NH3]']	64	2.22334	Polar	equal	Converged
EXOKOR01_FSR	['12']	[30]	[2]	[2, 2, 2]	[30 30 30]	vasp	[2.315]	-5e-05	0.00012	2e-05	0.0474	-3e-05	-0.00502	0.02583	0.3141	0.01622	0	0.02469	0	-4e-05	-4e-05	0	-0.01377	-2e-05	-0.00253	0.316542	2	C18-H30-O24-Zn3	0.0221358	0.322549	['[OH2][Zn]([OH2])([OH2])[OH2]']	['[O-]C(=O)c1cc(cc(c1)C(=O)[O-])C(=O)[O-]', '[O-]C(=O)c1cc(cc(c1)C(=O)[O-])[C]1O[Zn](O1)([OH2])([OH2])([OH2])[OH2]']	75	2.03933	Polar	equal	Converged
DOHJOZ01_FSR	['12']	[48]	[2]	[2, 2, 2, 2, 2, 2]	[48 48 48 48 48 48]	vasp	[2.225]	0.00051	0.00048	-0.00089	-5e-05	-0.06597	0.02673	0.02693	-0.02649	-0.00041	-0.06592	0	0	-0.21816	-0.21816	-0.06992	0	0	0	0.316349	3m	C30-Cd6-Cl12-H36-N12-O6-S6	0.0458964	0.304049			108	2.18757	Polar	equal	Converged
VIGCAR_FSR	['9']	[27]	[2]	[2, 2]	[27 27]	vasp	[1.753]	-0.107	-0.06997	-0.06464	0	-0.09436	0	-0.00021	-0.00055	-0.00023	-0.11278	-0.00059	0.01478	-0.02956	-0.08218	-0.28266	0	-0.01248	0	0.314972	m	C8-Co2-H10-N4-O8-P2	0.184027	0.448214	['[OH2][Co]']	['[O]P(=O)(c1nccnc1)[O]']	34	2.33991	Polar	equal	Converged
HUZGEP_FSR	['12']	[30]	[2]	[2, 2]	[30 30]	vasp	[2.222]	-1e-05	0	0	0.16293	-1e-05	0.03377	-0.00969	0.07897	-0.03692	0	-0.02979	0	-2e-05	0	3e-05	0.2676	0	0.01541	0.314808	2	C47-H34-N6-O9-Zn2	0.0633759	0.302721			98	1.47537	Polar	equal	Converged
BOQWEK_FSR	['12']	[30]	[2]	[2, 2]	[30 30]	vasp	[2.353]	-0.16497	0.14601	-0.05133	0	0.00171	0	7e-05	4e-05	-7e-05	-0.04854	0.00017	-0.0133	-0.09673	0.19925	0.02506	0	0.08901	0	0.313725	m	C24-H20-N8-O8-Zn2	0.283799	0.274969	['[Zn]']	['[O-]C(=O)C=Cc1cnc[nH]1']	62	1.52183	Polar	equal	Converged
YAQMIO_FSR	['12']	[48]	[2]	[2, 2]	[48 48]	vasp	[2.234]	0	-1e-05	0	0	-0.02359	0	1e-05	-1e-05	1e-05	-0.31328	0	0	-0.0344	0.0402	-0.04266	0	0	0	0.31328	mm2	Cd2-H20-C20-Br4-N12-O8	0.08798	0.27439			66	2.32628	Polar	equal	Converged
SUZXOA_FSR	['14']	[50]	[2]	[2, 2]	[50 50]	vasp	[2.744]	-0.15001	-0.01242	-0.08634	0	0.08086	0	-0.00097	-0.00026	-0.00247	0.00787	0.00039	-0.03278	0.11118	-0.03383	0.2379	0	-0.02917	0	0.310736	m	C12-H10-O6-P2-Sn2	0.254368	0.471757	['[Sn]']	['[O]P(=O)(c1ccccc1)[O]']	32	2.35012	Polar	equal	Converged
ASAYOJ_FSR	['12']	[30]	[2]	[2, 2]	[30 30]	vasp	[2.22]	-1e-05	-1e-05	-3e-05	0.04066	1e-05	-0.07451	-0.22449	-0.21097	-0.01896	0	0.03577	0	2e-05	-3e-05	1e-05	-0.05679	-1e-05	-0.0093	0.310714	2	C38-H30-N8-O8-Zn2	0.100884	0.357762	['[Zn]']	['[O-]C(=O)c1c(ccc(c1C(=O)[O-])C(=O)[O-])C(=O)[O-]', 'c1cc(cc(c1)Cn1cncc1)Cn1cncc1']	86	1.47933	Polar	equal	Converged
JIRLAA_FSR	['1', '12']	[19, 48]	[1, 2]	[1, 1, 1, 1, 2, 2, 2, 2, 2, 2, 2, 2]	[19 19 19 19 48 48 48 48 48 48 48 48]	vasp	[1.245, 2.42]	0.15101	0.07259	-0.06024	0	0.04533	0	-1e-05	0	0	0.13465	0	0.04636	-0.19361	-0.15	-0.12163	0	-0.0476	0	0.310669	m	K4-Cd8-B4-H24-C32-O52	0.159713	0.313068			124	2.83788	Polar	equal	Converged
GIYKAB_FSR	['12']	[30]	[2]	[2, 2]	[30 30]	vasp	[2.188]	-0.01301	-0.0045	0.00189	0	0.00892	0	0.0012	0.00128	-2e-05	-0.02082	0.00018	0.03198	-0.27149	-0.10325	0.02426	0	-0.10675	0	0.310569	m	C24-H28-O8-Zn2	0.0747072	0.295019	['[Zn]']	['[O-]C(=O)C12CC3CC(C1)CC(C2)(C3)C(=O)[O-]']	62	1.79465	Polar	equal	Converged
XEYSAY_FSR	['9']	[27]	[2]	[2, 2]	[27 27]	vasp	[2.791]	0	0	0	0	-0.01767	0	6e-05	-7e-05	-4e-05	0.1172	0	0	0.10427	0.14853	0.25033	0	0	0	0.30919	mm2	Co2-P4-H24-C26-O14	0.141419	0.342608	['O', '[Co]']	['[O]P(=O)(c1ccc2-c3c(Cc2c1)cc(cc3)P(=O)(O)[O])O']	70	2.00472	Polar	equal	Converged
ECIWAO_FSR	['12']	[30]	[2]	[2, 2]	[30 30]	vasp	[2.341]	-0.05475	-0.08629	-0.09465	0	-0.07749	0	-0.00015	3e-05	0.00015	-0.00196	8e-05	0.02683	-0.12718	-0.06183	-0.21779	0	-0.07168	0	0.306768	m	C32-H24-N4-O8-Zn2	0.103066	0.340001	['[Zn]']	['[O-]C(=O)C=Cc1ccncc1']	70	1.55047	Polar	equal	Converged
KABTEO_FSR	['11']	[29]	[2]	[2, 2]	[29 29]	vasp	[1.143]	7e-05	0.00022	0.00034	-0.0192	0.00016	0.04203	-0.10221	-0.17016	-0.23049	0	0.02789	0	0.00051	0.00018	-0.00047	0.00978	-0.00013	-0.00328	0.305459	2	Cu2-H26-C22-N4-O12	0.135632	0.321721			66	1.66832	Polar	equal	Converged
UYACUT_FSR	['15']	[83]	[3]	[3, 3]	[83 83]	vasp	[4.331]	2e-05	1e-05	3e-05	0	0.05664	0	2e-05	-2e-05	-1e-05	0.06151	0	0	0.2772	0.04681	0.119	0	0	0	0.305274	mm2	Bi2-C20-H20-N22	0.0973533	0.289654			64	2.20857	Polar	equal	Converged
HEFNUD_FSR	['11']	[29]	[2]	[2, 2]	[29 29]	vasp	[1.667]	-0.20742	-0.1559	-0.08838	0	0.0404	0	0	0	0	0.02483	0	-0.12732	-0.09898	-0.04221	-0.09821	0	-0.05298	0	0.30521	m	C44-Cu2-H40-N8-O14	0.0954519	0.266127	['[OH2][Cu]']	['O=C(c1cccnc1)NCCNC(=O)c1cccnc1', '[O-]C(=O)c1cccc(c1)C(=O)[O-]']	108	1.50994	Polar	equal	Converged
CUGSON_FSR	['2']	[38]	[2]	[2, 2]	[38 38]	vasp	[2.62]	3e-05	-0.00012	-1e-05	-0.0085	0	0	0	2e-05	0	0	0.06606	0	0	0	0	0	0	-0.30436	0.30436	222	C8-H8-O12-Sr2	0.11622	0.37205			30	2.58274	Non-polar	equal	Converged
SEBMOB_FSR	['1']	[3]	[1]	[1, 1]	[3 3]	vasp	[1.098]	-0.00014	-8e-05	-2e-05	0.04429	0.00011	-0.27434	-0.22739	-0.00288	-0.11566	0	0.16457	0	6e-05	6e-05	6e-05	-0.08145	-3e-05	-0.0236	0.303604	2	Li2-H12-C8-N2-O8	0.219499	0.459936	['[Li]']	['[O-]C(=O)CC(C(=O)[O-])[NH3]']	32	1.5671	Polar	equal	Converged
FAMZIE_FSR	['14']	[50]	[4]	[4, 4, 4, 4]	[50 50 50 50]	vasp	[2.821]	-1e-05	-3e-05	0	-0.02787	-4e-05	-0.02208	-0.13612	-0.21237	-0.08577	0	-0.14324	0	2e-05	5e-05	1e-05	-0.0156	3e-05	0.04118	0.302496	2	C20-H44-O10-Sn4	0.0285568	0.298031	['[Sn]']	['[O-]C(=O)C(CC(=O)O[Sn])O']	78	1.98513	Polar	equal	Converged
PELTEG_FSR	['12']	[48]	[2]	[2, 2]	[48 48]	vasp	[2.404]	0.19494	0.01934	0.08312	0	0.03157	0	-1e-05	-5e-05	-6e-05	-0.13092	0.00013	0.02663	0.13901	0.09513	0.09219	0	0.13312	0	0.302411	m	C6-Cd2-H20-N2-O14-P2	0.0987006	0.310188	['[OH2][Cd][OH2]']	['[O-]C(=O)C[NH2]CP(=O)([O])[O]']	46	2.57136	Polar	equal	Converged
KIDLOZ_FSR	['12']	[48]	[2]	[2, 2]	[48 48]	vasp	[2.452]	0.21991	0.08611	0.17659	0	-0.02671	0	-0.00012	1e-05	-0.00012	0.08267	3e-05	0.20149	0.01198	-0.23491	0.05478	0	0.03742	0	0.300461	m	Cd2-H20-C18-N12-O12	0.232931	0.420247	['[Cd]']	['[O-]C(=O)CN[C]1NC(=NC(=N1)NCC(=O)[O-])NCC(=O)[O-]']	64	2.24393	Polar	equal	Converged
HOYMUD02_FSR	['11']	[29]	[1]	[1, 1, 1, 1]	[29 29 29 29]	vasp	[0.444]	-1e-05	-2e-05	-5e-05	0	0.02303	0	-0.00069	0.00099	-0.00069	0.05212	0	0	0.11179	0.12422	0.24941	0	0	0	0.300222	mm2	C12-Cu4-H8-N8-S4	0.09549	0.244196	['[Cu]']	['[S]C#N', 'c1ccncn1']	36	2.3397	Polar	equal	Converged
EMOTEG_FSR	['12']	[30]	[2]	[2, 2, 2, 2]	[30 30 30 30]	vasp	[2.305]	-3e-05	1e-05	0	-0.02342	0.00285	-1e-05	1e-05	-3e-05	-3e-05	0.00284	0.02343	-1e-05	-0.17865	-0.17865	-0.16141	0	0	0	0.299808	4	Zn4-H56-C40-N8-O24	0.0225144	0.288562			132	1.68062	Polar	equal	Converged
PEWDEC_FSR	['12']	[30]	[2]	[2, 2, 2, 2]	[30 30 30 30]	vasp	[2.16]	2e-05	-1e-05	-1e-05	-0.19191	4e-05	-0.22882	-0.04839	-0.05902	-0.07145	0	-0.04357	0	1e-05	-4e-05	3e-05	-0.01185	-1e-05	0.0185	0.298716	2	Zn4-H56-C40-O16	0.0223674	0.303825	['[Zn]']	['[O-]C(=O)C1CCC(C1(C)C)(C)C(=O)[O-]']	116	1.66698	Polar	equal	Converged
UNABAN_FSR	['12']	[30]	[2]	[2, 2]	[30 30]	vasp	[2.153]	4e-05	0	6e-05	-0.03041	0	0.03217	0.07857	-0.27835	0.06804	0	-0.01025	0	-1e-05	0	-2e-05	-0.03064	1e-05	0.03337	0.297299	2	Zn2-H24-C16-S4-N4-O8	0.0970904	0.209095	['[Zn]']	['[O-]C(=O)C1CSCN1']	58	1.92909	Polar	equal	Converged
INAKIT_FSR	['10']	[28]	[2]	[2, 2]	[28 28]	vasp	[1.577]	0.09881	0.03652	0.075	0	0.09803	0	0	1e-05	0	-0.02267	0	-0.01731	0.12018	0.07589	0.17175	0	0.11218	0	0.294654	m	C30-H32-N12-Ni2-O8	0.100043	0.264653	['[OH2][Ni]']	['[N][N][N]']	84	1.69305	Polar	equal	Converged
AQANOW01_FSR	['12']	[48]	[2]	[2, 2]	[48 48]	vasp	[2.529]	0.21422	0.07766	0.10606	0	0.07772	0	-3e-05	-1e-05	-1e-05	-6e-05	0	0.00919	0.14515	0.0202	-0.00648	0	0.01376	0	0.29352	m	Cd2-H40-C44-N8-O12	0.108346	0.361716	['[OH2][Cd]']	['Oc1cc(cc(c1)C(=O)[O-])C(=O)[O-]', 'c1ncn(c1)Cc1ccc(cc1)Cn1cncc1']	106	1.77482	Polar	equal	Converged
ROZXAH_FSR	['13', '12']	[13, 48]	[3, 2]	[3, 3, 2, 2]	[13 13 48 48]	vasp	[2.928, 2.147]	0.00265	0.11496	0.07156	0	-0.13862	0	0	0	0	-0.06828	0	0.1072	-0.12776	-0.20691	-0.05712	0	0.02994	0	0.291981	m	Al2-Cd2-B10-H36-C10-N8-O20	0.194953	0.361463			88	2.06497	Polar	equal	Converged
CUSVUI_FSR	['12']	[30]	[2]	[2, 2]	[30 30]	vasp	[2.597]	0.12205	-0.02327	-0.02959	0	0.03561	0	1e-05	-1e-05	0	-0.02972	0	0.01424	-0.05449	-0.02314	-0.28505	0	0.01614	0	0.291793	m	Zn2-H16-C26-S2-N6-Cl2-O6	0.0909208	0.254322			60	1.91554	Polar	equal	Converged
UMORIY_FSR	['12']	[48]	[2]	[2, 2, 2, 2]	[48 48 48 48]	vasp	[2.59]	0	-7e-05	-5e-05	0	0.18995	0	0	0	0	-0.10341	0	0	0.28777	-0.04524	0.00581	0	0	0	0.291362	mm2	C8-Cd4-H8-N16-O12	0.102087	0.218099	['[Cd]', '[OH2][Cd][OH2]']	['[O-]C(=O)C1=NN=N[N]1']	48	2.54792	Polar	equal	Converged
ROPWEA_FSR	['6']	[42]	[6]	[6, 6]	[42 42]	vasp	[4.332]	-0.00019	-0.00023	-0.00049	0.03442	-0.00019	0.02607	0.00113	0.14302	0.07655	0	0.04219	0	-0.0006	-0.00025	-0.00172	0.28656	-0.00076	0.0366	0.291326	2	Mo2-H24-C30-N4-O12	0.15575	0.290484			72	1.62506	Polar	equal	Converged
FIBJAE_FSR	['12']	[48]	[2]	[2, 2, 2, 2, 2, 2, 2, 2, 2, 2, 2, 2]	[48 48 48 48 48 48 48 48 48 48 48 48]	vasp	[2.558]	3e-05	-0.00013	2e-05	0	0.14919	0	-1e-05	-1e-05	-1e-05	0.09275	0	0	-0.23263	-0.15968	-0.06707	0	0	0	0.290022	mm2	Cd12-H24-C12-N72-Cl8	0.074637	0.30072	['Cl[Cd]', '[Cd]']	['NC1=NN=N[N]1', '[N][N][N]']	128	2.93638	Polar	equal	Converged
GICTOB01_FSR	['12']	[30]	[2]	[2, 2]	[30 30]	vasp	[2.32]	-0.20673	0.13573	-0.02872	0	0.02834	0	2e-05	0.00017	0	-0.02748	0	-0.03488	0.06221	-0.09573	-0.21609	0	-0.05544	0	0.289853	m	C12-H16-N4-O14-Zn2	0.0488195	0.284885	['[OH2][Zn]([OH2])[OH2]']	['[O-]C(=O)c1nccnc1C(=O)[O-]']	48	2.065	Polar	equal	Converged
CIZMIJ_FSR	['12']	[30]	[2]	[2, 2]	[30 30]	vasp	[2.269]	0.0466	0.04085	0.00067	-0.02296	0.0239	-0.02082	-0.03413	-0.24016	-0.07758	0.04992	0.01472	0.00569	-0.03687	-0.10395	-0.04952	0.00538	-0.00032	-0.00111	0.289486	1	Zn2-H40-C60-N12-O14	0.103252	0.270027	['[Zn]']	['c1ncn(c1)c1cc(cc(c1)n1cncc1)n1cncc1']	128	1.4726	Polar	equal	Converged
QEBGEM_FSR	['12']	[48]	[2]	[2, 2]	[48 48]	vasp	[2.662]	-1e-05	0	-1e-05	0	-0.07047	0	-0.00012	0.00093	4e-05	-0.08541	0	0	-0.03651	-0.18793	-0.21668	0	0	0	0.289139	mm2	C48-Cd2-H48-N8-O12	0.105628	0.303312	['[Cd]']	['C(Cn1cncc1)CCn1cncc1']	118	1.73848	Polar	equal	Converged
HEBTOA_FSR	['1']	[11]	[1]	[1, 1, 1, 1, 1, 1]	[11 11 11 11 11 11]	vasp	[1.135]	-3e-05	0	8e-05	0.02723	-3e-05	-0.04538	-0.074	0.10156	-0.25273	0	0.0599	0	6e-05	0	-9e-05	-0.12918	5e-05	0.02585	0.288532	2	Na6-B10-H4-C2-O22	0.306021	0.560808	['[Na]']	['OB1O[B]23OB4O[B](O1)(O3)OB(O2)O4', '[O-]C=O']	44	2.36411	Polar	equal	Converged
OFIZAF_FSR	['11']	[29]	[1]	[1, 1, 1, 1]	[29 29 29 29]	vasp	[0.638]	-0.056	0.12822	-0.00868	0	0.03416	0	-1e-05	0	0	-0.04264	0	0.00878	0.12267	-0.20244	-0.08813	0	-0.02826	0	0.28693	m	Cu4-H8-C10-S2-Br2-N2	0.166405	0.350728	['[Cu][Cu]Br']	['[S]c1ccncc1']	28	3.00069	Polar	equal	Converged
ABIVOY_FSR	['2']	[56]	[2]	[2, 2, 2, 2]	[56 56 56 56]	vasp	[2.775]	7e-05	-2e-05	-6e-05	0	-0.06452	0	0	0	1e-05	-0.13242	0	0	-0.07937	-0.16511	-0.22034	0	0	0	0.28655	mm2	Ba4-H48-C32-S4-O44	0.0700631	0.295113	['O', '[Ba]']	['[O-]C(=O)c1cc(cc(c1)S([O])([O])[O])C(=O)O']	132	2.23803	Polar	equal	Converged
AVUFED01_FSR	['1']	[11]	[1]	[1]	[11]	vasp	[1.241]	-0.12382	-0.03297	-0.02619	-0.00352	0.03738	0.0522	0.00015	-0.15085	-0.00302	-0.01282	0.06718	0.04199	-0.1594	-0.07232	-0.1507	-0.07167	-0.0417	0.06101	0.28652	1	Na1-H7-C8-S1-O8	0.296919	0.36808			25	1.87043	Polar	equal	Converged
LIQJIE_FSR	['12']	[48]	[2]	[2, 2]	[48 48]	vasp	[2.248]	-0.00106	-0.00047	-0.00026	-0.00823	0.00015	-0.00444	-0.23917	-0.02257	-0.10583	0	-0.11405	0	-0.00019	-6e-05	-4e-05	0.0169	5e-05	-0.0305	0.286217	2	C44-Cd2-H42-N6-O12-S2	0.0596705	0.319264	['[Cd]']	['[O-]C(=O)C(NS(=O)(=O)c1ccc(cc1)C)CCC(=O)[O-]']	108	1.70353	Polar	equal	Converged
VOKMUE_FSR	['8']	[26]	[2]	[2, 2]	[26 26]	vasp	[2.148]	0.0106	-0.00382	-0.00036	0.00546	0.00203	-0.13405	0.22374	0.16887	-0.05148	-0.00014	-0.00864	-0.00187	0.00037	0.00085	-0.00123	-0.01496	0.00064	0.02199	0.285249	2	Fe2-P2-H18-C6-O8	0.219714	0.322458	['[OH2][Fe]']	['CCCP(=O)([O])[O]']	36	2.05777	Polar	equal	Converged
HUSJUC_FSR	['fblock']	[57]	[3]	[3, 3]	[57 57]	vasp	[4.476]	0.09919	0.04131	0.11012	0	0.05484	0	0.00012	0.00011	0.00014	0.01957	2e-05	0.0296	0.13291	0.0437	0.16137	0	0.08715	0	0.282414	m	C42-H22-La2-O14	0.287933	0.483803	['[OH2][La]']	['[O-]C(=O)c1ccc2c(c1)c1ccc(cc1c1c2cc(cc1)C(=O)[O-])C(=O)[O-]']	80	1.6596	Polar	equal	Converged
IXOJOW_FSR	['9']	[27]	[2]	[2, 2]	[27 27]	vasp	[2.095]	-1e-05	-1e-05	-1e-05	0.11921	0	0.09869	0.01915	-0.24723	-0.13057	0	-0.03049	0	-1e-05	0	0	0.04632	0	-0.00394	0.2819	2	Co2-H18-C12-N6-O12	0.0814375	0.31703	['[OH2][Co][OH2]']	['[O-]C(=O)Cn1nnc(c1C)C(=O)[O-]']	50	1.99709	Polar	equal	Converged
MUQVEA_FSR	['12']	[30]	[2]	[2, 2]	[30 30]	vasp	[1.856]	0	0	0	0	0.1016	0	-8e-05	3e-05	2e-05	-0.08678	0	0	-0.13785	-0.1537	-0.1913	0	0	0	0.281464	mm2	Zn2-B2-H18-C4-N22-Cl2	0.282417	0.344391	['Cl[Zn]']	['Nc1nnnn1[BH2]n1nnnc1N']	50	1.86266	Polar	equal	Converged
DUQSEO_FSR	['fblock']	[57]	[3]	[3, 3]	[57 57]	vasp	[4.273]	-0.00025	-9e-05	-0.00015	-0.28127	0	0	-1e-05	0	3e-05	0	0.00665	0	0.00012	-2e-05	-0.00015	0	0	-0.05309	0.28127	222	C14-H18-La2-N20-O10	0.07089	0.2429	['[OH2][La]([OH2])[OH2]']	['[O-]C(=O)C1=NN=N[N]1', 'c1cnc(nc1)C1=NN=N[N]1']	64	2.04159	Non-polar	equal	Converged
IXUDAI_FSR	['1']	[11]	[1]	[1, 1]	[11 11]	vasp	[1.231]	-4e-05	-5e-05	7e-05	-0.0002	-0.06964	0.10122	0.10027	-0.10064	0.00042	-0.0695	0	0	-0.08691	-0.08691	-0.25233	0	0	0	0.280673	3m	B2-C12-H8-N24-Na2-O12	0.0755368	0.338084			60	1.84551	Polar	equal	Converged
FAFDEX_FSR	['1', '7']	[19, 25]	[1, 2]	[1, 2]	[19 25]	vasp	[1.304, 2.594]	0.08259	0.00167	0.16758	0.05658	0.16037	-0.09974	0.0083	0.02638	-0.04867	0.04566	-0.02958	-0.02361	0.03239	0.00031	0.00834	0.00525	0.09426	0.0337	0.280252	1	K1-Mn1-H16-C12-I3-O15	0.110309	0.250467			48	2.54312	Polar	equal	Converged
KULMIP_FSR	['12']	[48]	[2]	[2, 2]	[48 48]	vasp	[2.48]	0.17397	0.16428	0.13779	0	-0.03247	0	4e-05	2e-05	-1e-05	0.06336	0	0.19137	-0.11328	0.1027	0.08881	0	0.12204	0	0.279672	m	C14-Cd2-H12-N4-O8	0.287593	0.42192	['[Cd]']	['[O-]C(=O)c1cc(N)cnc1', '[O-]C=O']	40	2.481	Polar	equal	Converged
AFAVUA_FSR	['12']	[48]	[2]	[2, 2, 2, 2]	[48 48 48 48]	vasp	[2.299]	0	0	0	0	0.01371	0	-0.0001	-7e-05	-4e-05	0.08594	0	0	0.00766	0.20468	-0.18931	0	0	0	0.27891	mm2	Cd4-H36-C16-N4-O24	0.121719	0.390673	['[OH2][Cd][OH2]']	['[O-]C(=O)CNCC(=O)[O-]']	84	2.367	Polar	equal	Converged
ITOZEY_FSR	['11']	[29]	[2]	[2, 2]	[29 29]	vasp	[1.689]	2e-05	-1e-05	0	-0.01585	1e-05	-0.05834	-0.13002	-0.05591	-0.23858	0	-0.02736	0	0	-1e-05	2e-05	-0.04961	0	-0.00727	0.278747	2	Cu2-P2-H30-C34-N4-O12	0.0633362	0.25226	['[OH2][Cu]']	['[O-]C(=O)c1ccc(cc1)P(=O)(O)[O]', '[O-]C(=O)c1ccc(cc1)P(=O)([O])O']	84	1.76252	Polar	equal	Converged
WOQJIW03_FSR	['12']	[30]	[2]	[2, 2, 2, 2]	[30 30 30 30]	vasp	[1.688]	-3e-05	0	4e-05	0	0.01266	0	0.00015	1e-05	1e-05	0.01337	0	0	0.08627	-0.00192	0.26407	0	0	0	0.277811	mm2	C10-H28-N4-Te4-Zn4	0.192707	0.407318	['[Te]', '[Zn]']	['NCCCCCN']	50	2.70135	Polar	equal	Converged
QILRIO_FSR	['11']	[29]	[2]	[2, 2, 2, 2]	[29 29 29 29]	vasp	[1.425]	0.00116	0.00085	0.0001	-0.07087	-0.00167	-0.07394	-0.09518	-0.12974	0.1606	0	-0.15889	0	-0.00057	-0.00046	-5e-05	0.1217	0.00019	-0.07576	0.277363	2	Cu4-H20-C8-S2-N16-O12	0.105573	0.301568	['[Cu]', '[OH]']	['Nn1cnnc1']	62	2.01754	Polar	equal	Converged
SODKON_FSR	['11']	[29]	[1]	[1, 1, 1, 1, 1, 1]	[29 29 29 29 29 29]	vasp	[0.75]	0.0425	-0.04254	8e-05	0	0.01782	0	0.00036	-0.00028	1e-05	0.01761	-0.00015	-0.04283	0.12352	0.12352	-0.21412	0	0	0	0.276336	3m	Cu6-H30-C12-S6-I6-N6	0.158956	0.28644	['[Cu]I']	['CC(=S)N']	66	2.82089	Polar	equal	Converged
RUGJAG_FSR	['fblock']	[70]	[3]	[3]	[70]	vasp	[4.168]	-1e-05	3e-05	3e-05	0.05893	0	0.10389	0.19158	0.19036	-0.04502	0	0.02589	0	4e-05	3e-05	-4e-05	-0.01208	0	0.03684	0.275022	2	C5-H9-N2-O8-Yb1	0.146404	0.403873	['[Yb]']	['[O-]C=O']	25	2.72649	Polar	equal	Converged
SUHHOT_FSR	['fblock']	[57]	[3]	[3, 3]	[57 57]	vasp	[4.157]	-0.05943	0.06397	0.00329	-0.01982	-0.0908	0.02667	-0.15293	0.03478	-0.03095	-0.00511	-0.05339	-0.04145	-0.15184	-0.08136	-0.1357	-0.09038	-0.00467	-0.02364	0.274855	1	La2-H20-C12-O22	0.0686033	0.286601			56	2.43196	Polar	equal	Converged
HOSPEL_FSR	['11']	[29]	[1]	[1, 1, 1, 1]	[29 29 29 29]	vasp	[0.693]	0.03044	0.01411	-0.09805	0	-0.01825	0	0.00093	0.00021	0.00011	-0.06187	-1e-05	0.02809	-0.25206	-0.07561	0.04333	0	0.03129	0	0.273834	m	C12-Cl2-Cu4-H8-N10	0.197731	0.414077	['Cl[Cu]', '[Cu]']	['n1ccc(cc1)C1=N[N]N=N1']	36	2.61018	Polar	equal	Converged
IHEPES_FSR	['11']	[29]	[2]	[2, 2]	[29 29]	vasp	[1.29]	-0.18117	0.08033	0.08666	0	0.1657	0	0.00018	0.00026	0.0001	0.02203	-8e-05	0.07948	0.02504	-0.03818	-0.0938	0	0.07159	0	0.272943	m	C12-Cl4-Cu2-F4-H24-N4-O4	0.11576	0.254978			54	1.85461	Polar	equal	Converged
LUPCIK_FSR	['12']	[30]	[2]	[2, 2]	[30 30]	vasp	[2.199]	0.00019	-4e-05	7e-05	0	0.17559	0	0.00021	-8e-05	0.0001	-0.01827	0	0	0.24777	-0.02433	0.11067	0	0	0	0.272452	mm2	C24-F4-H12-N4-O8-Zn2	0.0546157	0.276027	['[Zn]']	['[O-]C(=O)c1cc(F)cnc1']	54	1.90299	Polar	equal	Converged
DORFOG_FSR	['2']	[12]	[2]	[2, 2, 2, 2]	[12 12 12 12]	vasp	[2.139]	0	-6e-05	0	-0.00124	0.07625	4e-05	-4e-05	7e-05	0	0.07625	0.00125	-7e-05	0.13682	0.13682	0.19032	0	0	0	0.271406	4	Mg4-H32-C16-O28	0.0736881	0.28117	['[OH2][Mg][OH2]']	['[O-]C(=O)CC(C(=O)[O-])O']	80	1.59769	Polar	equal	Converged
IPINAY_FSR	['11']	[29]	[1]	[1, 1, 1, 1]	[29 29 29 29]	vasp	[0.773]	3e-05	8e-05	1e-05	0	-0.17899	0	0.00141	-0.00043	0.00039	0.15255	0	0	-0.07847	0.24124	0.09393	0	0	0	0.270514	mm2	C24-Cu4-H16-N4-O8	0.189777	0.182772	['[Cu][Cu]']	['[O-]C(=O)c1ccncc1']	56	2.05974	Polar	equal	Converged
EPIYOT_FSR	['11']	[29]	[1]	[1, 1]	[29 29]	vasp	[-0.013]	0.0014	-0.00049	-0.00068	0.05502	0.00103	0.02572	-0.10514	-0.16064	-0.18283	0	0.04987	0	-0.00093	0.00045	0.00027	-0.00404	-0.00071	0.06975	0.269766	2	Cu2-H14-C24-N12-O4	0.149854	0.293802	['[Cu]']	['N#C[C](C1=C(C#N)C(=O)NC1=O)C#N']	56	1.64641	Polar	equal	Converged
PEGTUS02_FSR	['11']	[29]	[2]	[2, 2]	[29 29]	vasp	[2.02]	-0.12357	-0.19263	-0.00073	0.02595	0.00496	0.02605	0.04245	0.11318	-0.04655	0.00335	-0.01604	-0.04913	-0.02855	-0.03866	-0.02987	-0.00968	-0.02689	0.0048	0.267558	1	Cu2-P6-H38-C28-N2-O20	0.0204291	0.259211	['[Cu]', '[OH2][Cu]']	['[O]P(=O)(Cc1cc(cc(c1)CP(=O)(O)[O])CP(=O)(O)O)O', 'n1ccc(cc1)c1ccncc1']	96	1.86519	Polar	equal	Converged
EJIROG_FSR	['12']	[30]	[2]	[2, 2, 2, 2]	[30 30 30 30]	vasp	[1.822]	3e-05	1e-05	1e-05	0	0.00571	0	7e-05	4e-05	2e-05	-0.01044	0	0	0.04164	-0.01889	0.26299	0	0	0	0.266935	mm2	C16-H24-N4-S4-Zn4	0.215631	0.441773	['[S]', '[Zn]']	['NCc1cccc(c1)CN']	52	2.24427	Polar	equal	Converged
BOHGOU_FSR	['7']	[25]	[2]	[2, 2]	[25 25]	vasp	[2.249]	-0.07715	-0.03891	0.00412	0	0.11158	0	-2e-05	-0.00011	1e-05	-0.03326	1e-05	-0.08673	-0.21671	-0.101	0.00675	0	0.03894	0	0.266438	m	C8-H12-Mn2-O12	0.140226	0.244975	['[OH2][Mn][OH2]']	['[O-]C(=O)C=CC(=O)[O-]']	34	1.98023	Polar	equal	Converged
ZIXCOA_FSR	['2']	[38]	[2]	[2, 2]	[38 38]	vasp	[2.471]	-1e-05	-2e-05	-2e-05	-0.0535	-4e-05	0.0308	0.20436	0.1321	-0.04331	0	0.09887	0	4e-05	-5e-05	-5e-05	0.07632	1e-05	0.00662	0.266204	2	Sr2-H36-C20-O24	0.117405	0.32304			82	1.91617	Polar	equal	Converged
CIHROB_FSR	['12']	[30]	[2]	[2, 2]	[30 30]	vasp	[2.358]	1e-05	-1e-05	1e-05	-0.01052	1e-05	-0.02269	-0.0325	0.00365	0.25671	0	0.06121	0	1e-05	1e-05	2e-05	0.0053	0	0.03388	0.265925	2	Zn2-H26-C22-N10-O8	0.0776977	0.304001	['[Zn]']	['[O-]C(=O)CNCC(=O)[O-]', 'c1ncn(c1)Cn1cncc1']	68	1.67168	Polar	equal	Converged
FABJID_FSR	['11']	[29]	[1]	[1, 1]	[29 29]	vasp	[0.656]	0.03078	-0.01812	-0.04857	0	0.04161	0	0	7e-05	6e-05	0.00856	-3e-05	0.02171	-0.01257	0.13085	0.21584	0	-0.05524	0	0.265742	m	Cu2-H16-C24-N4-Cl2-O8	0.110213	0.26066			56	1.92042	Polar	equal	Converged
EBUQID_FSR	['14']	[82]	[2]	[2, 2]	[82 82]	vasp	[3.239]	0.04512	0.06228	0.05945	0	-0.24669	0	7e-05	2e-05	-1e-05	0.08853	3e-05	0.00804	-0.02822	0.00963	0.02247	0	-0.00139	0	0.265178	m	C24-H18-I4-N6-Pb2	0.295027	0.271682			54	3.08761	Polar	equal	Converged
XILPUE_FSR	['12']	[30]	[2]	[2, 2]	[30 30]	vasp	[2.033]	0.11008	-0.02882	-0.04425	0	0.04672	0	2e-05	-1e-05	7e-05	0.0824	3e-05	-0.08671	-0.00467	0.12247	0.2255	0	0.02691	0	0.263994	m	Zn2-H16-C12-N4-Cl4-O4	0.19877	0.397862	['Cl[Zn]Cl']	['[O-]C(=O)CN1[CH]N(C=C1)C']	42	1.86131	Polar	equal	Converged
HORWIU_FSR	['11']	[29]	[1]	[1, 1, 1, 1]	[29 29 29 29]	vasp	[0.818]	-6e-05	0.0001	9e-05	0	0.0227	0	8e-05	4e-05	2e-05	-0.01809	0	0	0.06157	0.09269	0.23882	0	0	0	0.263472	mm2	C6-Cu4-H6-I4-N6	0.163807	0.358646			26	3.84271	Polar	equal	Converged
URACEW_FSR	['11']	[29]	[1]	[1, 1, 1]	[29 29 29]	vasp	[0.686]	-0.01205	0.01194	4e-05	-0.02458	-0.03638	0.05993	0.06022	-0.06028	-0.00027	-0.03589	0.02434	0.01223	-0.06322	-0.06322	-0.2463	0	0	0	0.262025	3	Cu3-H33-C39-N6-O6	0.260448	0.0975731	['[Cu]']	['[O-]C(=O)[CH][CH]c1ccc(cc1)Cn1cncc1']	87	1.69219	Polar	equal	Converged
EMOTOQ_FSR	['12']	[30]	[2]	[2]	[30]	vasp	[2.096]	0.20005	-0.01366	-0.02808	-0.00387	-0.04331	-0.06615	-0.09997	-0.08113	0.00224	-0.04204	-0.02733	0.10339	-0.07717	-0.01537	0.0427	-0.03216	-0.01102	-0.03193	0.261898	1	Zn1-H16-C11-N2-O6	0.130332	0.221451			36	1.76579	Polar	equal	Converged
YITMAQ01_FSR	['14']	[50]	[4]	[4]	[50]	vasp	[2.944]	0.11457	-0.10889	0.01397	0.00156	0.01821	-0.05713	0.02788	-0.21682	-0.00567	0.00367	0.00734	-0.01545	0.01841	0.03414	0.04019	-0.05108	0.02546	0.00629	0.26175	1	Sn1-H21-C13-N1-F2	0.113045	0.251122			38	1.54631	Polar	equal	Converged
CIJZIG_FSR	['7']	[25]	[2]	[2, 2]	[25 25]	vasp	[2.411]	0	0	-1e-05	0.05211	0	0.01262	0.0222	0.12557	0.22684	0	-0.00201	0	0	0	0	0.01933	0	0.02065	0.260233	2	Mn2-H20-C12-O10	0.042365	0.246752	['[OH2][Mn]']	['[O-]C(=O)CCCCC(=O)[O-]']	44	1.96342	Polar	equal	Converged
BEVQID_FSR	['12', '2', '4']	[48, 38, 40]	[2, 2, 4]	[2, 2, 4]	[48 38 40]	vasp	[2.684, 2.528, 4.877]	0.00022	-0.00023	1e-05	0	0.05145	0	3e-05	-2e-05	-1e-05	-0.05142	0	0	-0.184	0.1839	3e-05	0	0	0	0.260145	-42m	C8-Cd1-H8-O20-Sr1-Zr1	0.0506713	0.209474	['[Cd]', '[OH2][Sr]([OH2])([OH2])[OH2]', '[Zr]']	['[O-]C(=O)C(=O)[O-]']	39	2.1374	Non-polar	equal	Converged
FENSUN_FSR	['7']	[25]	[2]	[2, 2]	[25 25]	vasp	[2.471]	0.00019	0.00014	-0.00022	-0.02817	-0.00018	0.05565	0.14525	0.14365	-0.14363	0	-0.06903	0	-0.00025	-0.00026	0.00015	-0.05253	0.00021	0.02613	0.259091	2	Mn2-H8-C10-N4-O10	0.139522	0.23782	['[OH2][Mn]']	['[O-]C(=O)c1[nH]cnc1C(=O)[O-]']	34	2.11539	Polar	equal	Converged
XAKRUY_FSR	['12']	[48]	[2]	[2, 2]	[48 48]	vasp	[2.452]	0.02384	0.01845	-0.00359	0	0.04948	0	0.00012	-0.00012	-6e-05	0.14992	2e-05	-0.12741	0.03371	0.11211	0.22977	0	-0.02332	0	0.258951	m	C6-Cd2-H8-N8-O6-S2	0.221781	0.377883	['[OH2][Cd]']	['[O-]C(=O)CN1N=N[N]C1=S']	32	2.62957	Polar	equal	Converged
IWETAF01_FSR	['2']	[20]	[2]	[2, 2]	[20 20]	vasp	[2.525]	2e-05	-6e-05	-1e-05	-0.07374	5e-05	-0.01711	0.0839	-0.08156	0.21882	0	-0.07046	0	3e-05	-3e-05	-2e-05	-0.0219	1e-05	0.03207	0.25795	2	Ca2-H20-C8-O16	0.127891	0.302547	['[OH2][Ca]([OH2])[OH2]']	['[O-]C(=O)CC(C(=O)[O-])O']	46	1.836	Polar	equal	Converged
POFJOK_FSR	['12']	[30]	[2]	[2, 2]	[30 30]	vasp	[2.366]	-5e-05	-2e-05	-1e-05	-0.01356	-4e-05	0.11254	0.21615	0.07358	0.06392	0	0.1006	0	-0.00023	-0.00012	-7e-05	0.00654	-9e-05	0.00777	0.257568	2	C16-H12-I2-O12-Zn2	0.171625	0.377733	['[OH2][Zn]([OH2])([OH2])[OH2]', '[Zn]']	['[O-]C(=O)c1cc(c(cc1C(=O)[O-])I)c1cc(C(=O)[O-])c(cc1I)C(=O)[O-]']	44	2.16607	Polar	equal	Converged
SEKLEC01_FSR	['11']	[29]	[1]	[1, 1]	[29 29]	vasp	[0.429]	0.07657	0.09527	0.01491	0	-0.02217	0	5e-05	3e-05	-4e-05	0.25531	0	-0.03388	0.06127	0.05522	-0.02521	0	-0.06019	0	0.257548	m	Cu2-H14-C16-S2-O4	0.22456	0.191347	['[Cu]']	['COC(=O)c1ccc(cc1)[S]']	38	2.00219	Polar	equal	Converged
KUQNOA_FSR	['1']	[11]	[1]	[1, 1]	[11 11]	vasp	[1.177]	0.18049	0.07564	0.09268	0.05599	0.02051	-0.00041	0.13539	-0.00768	-0.11043	0.03056	-0.02012	0.00142	-0.01506	-0.11784	0.12451	-0.07978	0.06774	0.00963	0.256483	1	Na2-H40-C24-N8-O19	0.108297	0.266874	['[OH2][Na]([OH2][Na]([OH2])([OH2])[OH2])[OH2]']	['OCC1C(O)C(C(N1C(=O)[O-])c1c[nH]c2c1nc[nH]c2=O)O']	93	1.52078	Polar	equal	Converged
UWEGUZ_FSR	['11']	[29]	[2]	[2, 2]	[29 29]	vasp	[1.767]	0.00015	4e-05	8e-05	0.17275	4e-05	-0.00564	-0.07031	-0.22089	-0.06046	0	0.09032	0	-0.00014	0.00031	0.00047	0.02717	0.00011	0.08069	0.256026	2	C32-Cu2-H26-N4-O12-P2-S2	0.0578072	0.225249	['[Cu]']	['[O]S(c1ccc(cc1)P(=O)(O)[O])([O])[O]', 'n1ccc(cc1)c1ccncc1']	80	1.79295	Polar	equal	Converged
DAYVEF_FSR	['12']	[48]	[2]	[2, 2, 2, 2]	[48 48 48 48]	vasp	[2.427]	0	0	0	0	-0.04086	0	0	0	0	0.01919	0	0	-0.0794	-0.02519	0.24064	0	0	0	0.25465	mm2	Cd4-H40-C28-S4-N8-O20	0.0585932	0.312311	['[OH2][Cd]']	['[O-]C(=O)CSCC(=O)[O-]']	104	2.11538	Polar	equal	Converged
NORYAW_FSR	['11']	[29]	[1]	[1, 1, 1, 1]	[29 29 29 29]	vasp	[0.31]	1e-05	1e-05	-1e-05	0	0.01353	0	0.00011	0.00199	0.00144	-0.0131	0	0	-0.01556	-0.25222	0.03051	0	0	0	0.254541	mm2	C24-Cu4-H32-N16	0.0764906	0.178519	['[Cu]']	['C(CCN1[N]C=N[CH]1)CCCN1[N]C=N[CH]1', '[C]#N']	76	1.76895	Polar	equal	Converged
HORWEQ_FSR	['11']	[29]	[1]	[1, 1, 1, 1, 1, 1, 1, 1, 1, 1, 1, 1]	[29 29 29 29 29 29 29 29 29 29 29 29]	vasp	[0.843]	3e-05	2e-05	0	0	-0.04078	0	2e-05	0	-2e-05	-0.04072	0	0	-0.08217	-0.08217	-0.22432	0	0	0	0.252633	6mm	Cu12-H18-C18-Br12-N18	0.118389	0.205665	['[Cu]Br']	['Br[Cu]N1[CH]N=CN=C1']	78	3.32536	Polar	equal	Converged
BEMLAI_FSR	['1']	[3]	[1]	[1, 1]	[3 3]	vasp	[1.156]	-6e-05	2e-05	-6e-05	0.03347	0	-0.01073	-0.06898	-0.24215	-0.01658	0	-0.00123	0	1e-05	-4e-05	0.0001	0.01185	9e-05	-0.03684	0.252332	2	Li2-H8-C14-O6-F6	0.230083	0.42462	['[Li][OH2]']	['[O-]C(=O)c1c(F)cc(cc1F)F']	36	1.7249	Polar	equal	Converged
BOSGIA_FSR	['2']	[38]	[2]	[2, 2, 2, 2]	[38 38 38 38]	vasp	[2.621]	0.00031	0.00023	0.00033	0	0.0832	0	-5e-05	-0.00015	-0.00033	-0.23557	0	0	0.11539	-0.21957	-0.04076	0	0	0	0.251371	mm2	C4-H16-N24-O16-Sr4	0.0220816	0.242381	['[OH2][Sr][OH2]']	['O=N(=O)[N][C]1=NN=NN=1']	64	2.4063	Polar	equal	Converged
SACSEV_FSR	['11']	[29]	[1]	[1, 1]	[29 29]	vasp	[0.446]	0	0	0	0	0.13999	0	0	1e-05	1e-05	-0.20178	0	0	0.17491	-0.0409	-0.17572	0	0	0	0.251284	mm2	Cu2-H8-C8-N4-Cl2	0.236995	0.376601	['Cl[Cu]']	['c1ccncn1']	24	2.1541	Polar	equal	Converged
CAASCO03_FSR	['2']	[20]	[2]	[2, 2]	[20 20]	vasp	[2.617]	-9e-05	4e-05	-6e-05	0.02007	7e-05	-0.01365	0.03847	-0.23691	-0.07151	0	-0.02007	0	-4e-05	0.00025	-2e-05	0.00959	0.0001	0.00277	0.251243	2	Ca2-H36-C24-O28	0.0428489	0.247686	['[OH2][Ca][OH2]']	['OCC(C1OC(=O)C(=C1[O])O)O']	90	1.79943	Polar	equal	Converged
GETRED01_FSR	['15']	[83]	[3]	[3, 3, 3, 3]	[83 83 83 83]	vasp	[3.32]	0	0	-1e-05	0	0.12673	0	-3e-05	-3e-05	-1e-05	0.03942	0	0	-0.0787	-0.0497	-0.23335	0	0	0	0.251229	mm2	Bi4-H36-C40-Cl8-O16	0.175769	0.226486			104	2.50102	Polar	equal	Converged
CEGJOO_FSR	['12']	[30]	[2]	[2, 2, 2, 2]	[30 30 30 30]	vasp	[2.188]	-0.00038	0.00043	0.00039	0	0.0433	0	0.00027	-0.00016	-0.00024	0.01305	0	0	0.13299	0.05651	0.20428	0	0	0	0.25022	mm2	C16-H16-N8-O12-Zn4	0.159673	0.357736	['[OH2][Zn]']	['O=C1[N]C=NC(=O)[CH]1']	56	2.15149	Polar	equal	Converged
PALTOO_FSR	['12']	[48]	[2]	[2, 2]	[48 48]	vasp	[2.855]	0.00042	0.00024	0	-0.03727	-1e-05	0.05175	0.08436	0.1742	0.15314	0	-0.04022	0	-0.00017	-6e-05	-9e-05	0.00762	7e-05	0.00487	0.250064	2	C24-Cd2-H18-N18-O4	0.0571447	0.236866	['[OH2][Cd]']	['N#C[N]C#N']	66	1.76863	Polar	equal	Converged
RUTVUA_FSR	['2']	[12]	[2]	[2, 2, 2]	[12 12 12]	vasp	[2.39]	-0.15837	0.15842	-1e-05	-0.11081	0	0	-0.0002	0.00015	-1e-05	-0.00018	0.11069	0.1585	0	0	0	0	0	0	0.249914	32	Mg3-H12-C24-O21	0.0597303	0.294128	['[Mg]']	['[O-]C(=O)c1cc(O)c(c(c1)O)[O]']	60	1.57377	Non-polar	equal	Converged
UFIKAX01_FSR	['1']	[55]	[1]	[1, 1, 1, 1]	[55 55 55 55]	vasp	[1.386]	-0.03854	0.04657	0.00034	0	-0.02484	0	8e-05	-0.0001	2e-05	0.04952	-0.00015	-0.02509	0.00966	0.2089	-0.11225	0	-0.06162	0	0.249324	m	C12-Cs4-H8-N12-S12	0.0175888	0.245839			48	2.40228	Polar	equal	Converged
ALIMAL_FSR	['12']	[30]	[2]	[2, 2]	[30 30]	vasp	[2.334]	0.13768	0.14346	0.07517	0	0.05336	0	-2e-05	-1e-05	0	-0.02967	0	0.15678	-0.03528	-0.05031	-0.13303	0	-0.0271	0	0.248904	m	C46-H36-N4-O16-Zn2	0.110691	0.273321	['[Zn]']	['OC(=O)c1cc(C(=O)[O-])c(c(c1)C(=O)[O-])C(=O)[O-]']	104	1.54599	Polar	equal	Converged
CEHQOX_FSR	['15']	[83]	[3]	[3, 3, 3, 3]	[83 83 83 83]	vasp	[4.67]	0.00029	0.00019	8e-05	-0.00641	0	-0.16526	-0.1921	-0.15116	0.04565	0	-0.00922	0	1e-05	3e-05	4e-05	-0.04834	1e-05	-0.04325	0.248839	2	Bi4-H6-C14-N2-O12	0.157854	0.175249	['[Bi]', '[O]']	['[O-]C(=O)c1ccc(cn1)C(=O)[O-]']	38	4.36462	Polar	equal	Converged
DUFXOT_FSR	['2']	[38]	[2]	[2, 2]	[38 38]	vasp	[2.727]	-2e-05	8e-05	0.00021	0	-0.11312	0	-0.00347	-0.00608	-0.00673	-0.02579	0	0	-0.10505	-0.138	0.17694	0	0	0	0.247765	mm2	C16-H20-O20-S2-Sr2	0.261486	0.479149			60	1.90636	Polar	equal	Converged
VUWXUJ06_FSR	['12']	[30]	[2]	[2, 2, 2, 2, 2, 2]	[30 30 30 30 30 30]	vasp	[1.995]	0.00841	-0.00881	-0.00013	-0.00681	0.0067	0.03768	0.0401	-0.04006	0.00041	0.00686	0.00677	-0.00554	0.02448	0.02448	0.24439	0	0	0	0.24683	3	C42-H42-N18-O18-Zn6	0.112616	0.331421	['[Zn]']	['[O-]C(=O)C(NC(=O)C1=CN=N[CH]1)C', '[O-]C(=O)C(NC(=O)C1=C[N]N=C1)C']	126	1.47888	Polar	equal	Converged
TABFIO_FSR	['11']	[29]	[2]	[2, 2]	[29 29]	vasp	[1.677]	0	0	0	0	-0.17574	0	1e-05	-1e-05	-1e-05	-0.07398	0	0	-0.07324	-0.03616	-0.23146	0	0	0	0.245449	mm2	C20-Cu2-H20-N20-O12	0.116669	0.204737			74	1.87793	Polar	equal	Converged
IXUCOT_FSR	['9']	[27]	[2]	[2, 2]	[27 27]	vasp	[1.798]	0.1366	0.01546	0.0338	-0.00025	-0.04881	-0.00105	-0.01687	-0.01538	-0.01217	0.03285	0.00111	-0.00032	-0.0889	0.15103	-0.04969	-0.00083	0.13542	-0.00082	0.245396	m	C38-Co2-H24-N8-O8	0.0631862	0.215772	['[Co]']	['O=C1[N]NC(=O)c2c1cc(cc2)C(=O)[O-]']	80	1.72623	Polar	equal	Converged
FIXGAV_FSR	['12']	[30]	[2]	[2, 2]	[30 30]	vasp	[2.403]	0.11855	-0.01904	0.00313	0	-0.13062	0	-6e-05	-6e-05	-2e-05	-0.03807	4e-05	0.01821	-0.20664	-0.02558	-0.06091	0	-0.07439	0	0.244878	m	Zn2-H22-C34-N6-O8	0.108623	0.334628	['[Zn]']	['[O-]C(=O)c1cnccc1C(=O)[O-]']	72	1.72435	Polar	equal	Converged
WEHVOV_FSR	['7']	[25]	[2]	[2, 2]	[25 25]	vasp	[2.351]	-0.00014	-5e-05	-0.00015	-0.08158	4e-05	0.03332	0.15202	0.17327	0.07647	0	0.02256	0	0.00015	0.00023	0.00015	-0.09688	5e-05	0.02407	0.243904	2	Mn2-H32-C20-S2-O18	0.0666901	0.252342	['[OH2][Mn]([OH2])([OH2])[OH2]']	['[O-]C(=O)COc1ccc(cc1)SCC(=O)[O-]']	74	1.781	Polar	equal	Converged
MINLOM_FSR	['1']	[55]	[1]	[1, 1]	[55 55]	vasp	[1.512]	-3e-05	0	-1e-05	0.00824	-1e-05	-0.04337	0.09257	0.17783	0.03839	0	-0.13092	0	-3e-05	0	-1e-05	0.00184	0	-0.0523	0.242501	2	Cs2-H20-C30-N2-O8	0.0657282	0.26011	['[Cs]']	['CC(N1C(=O)c2cccc3c2c(C1=O)ccc3)C(=O)[O-]']	62	1.97021	Polar	equal	Converged
HUJGUP_FSR	['14']	[50]	[4]	[4, 4, 4, 4]	[50 50 50 50]	vasp	[3.01]	0	0	0	0	-0.24206	0	-1e-05	0	-2e-05	0.01042	0	0	-0.12683	-0.00458	-0.16532	0	0	0	0.24206	mm2	Sn4-H52-C36-N4-O12	0.19597	0.36347	['[Sn]']	['[O-]C(=O)c1ccc(=O)[nH]c1']	108	1.73029	Polar	equal	Converged
RIXCIL_FSR	['12']	[48]	[2]	[2, 2]	[48 48]	vasp	[2.501]	2e-05	0	-2e-05	0.01366	-1e-05	-0.06188	0.06461	-0.22784	-0.03411	0	-0.03603	0	-7e-05	4e-05	-7e-05	0.05152	3e-05	-0.12138	0.241965	2	C24-Cd2-H16-N4-O12	0.18144	0.404992	['[Cd]']	['[O-]C(=O)c1ncccc1O']	58	1.98629	Polar	equal	Converged
GOZMIT_FSR	['fblock']	[57]	[3]	[3, 3]	[57 57]	vasp	[4.487]	0.0962	-0.05787	0.06417	0	0.02307	0	-2e-05	1e-05	1e-05	-0.08026	0	0.00139	-0.1539	-0.10381	-0.12729	0	0.03323	0	0.241206	m	C24-H14-La2-N4-O14	0.0912345	0.239399	['[OH2][La]']	['[O-]C(=O)c1ccc(c(n1)c1nc(ccc1[O])C(=O)[O-])O']	58	2.36448	Polar	equal	Converged
PUPXII01_FSR	['7']	[25]	[2]	[2, 2, 2, 2]	[25 25 25 25]	vasp	[2.383]	-8e-05	4e-05	4e-05	0	-0.07554	0	1e-05	0	-1e-05	-0.12796	0	0	-0.15763	-0.04045	-0.17413	0	0	0	0.238337	mm2	Mn4-H28-C40-N12-O20	0.0872982	0.2661	['[OH2][Mn]']	['[O-]C(=O)c1[nH]c(nc1C(=O)[O-])c1ccncc1']	104	1.65077	Polar	equal	Converged
ROJSUF_FSR	['2']	[38]	[2]	[2, 2]	[38 38]	vasp	[2.591]	-0.00628	-0.11634	0.05429	-0.00101	0.04612	0.00023	0.00019	0.001	7e-05	0.0123	0.00046	-0.00692	0.02972	0.13165	-0.15443	-0.00169	0.04123	5e-05	0.237753	m	C4-H10-O12-P2-S2-Sr2	0.0634341	0.272879	['[Sr]']	['[O]S(CCP(=O)(O)[O])([O])[O]']	32	2.56134	Polar	equal	Converged
GIFGAG_FSR	['7']	[25]	[2]	[2, 2]	[25 25]	vasp	[2.334]	-0.11811	-0.11123	0.00331	0	-0.15516	0	-2e-05	0.00013	3e-05	-0.06092	9e-05	-0.0994	-0.02734	-0.02867	0.10728	0	-0.05491	0	0.237137	m	Mn2-H32-C24-N8-O12	0.125753	0.256085			78	1.71054	Polar	equal	Converged
KUZHAQ_FSR	['1']	[55]	[1]	[1, 1]	[55 55]	vasp	[1.339]	-0.04947	0.02063	-0.08782	-0.03246	-0.07944	-0.02851	-0.05892	0.19466	-0.01123	0.01298	-0.02961	-0.06394	-0.05909	0.00885	-0.10319	0.0518	-0.07224	0.02121	0.237065	1	Cs2-H20-C10-Cl2-O10	0.130631	0.341723	['[Cs]']	['OC1COC(C(C1O)O)O']	44	2.2637	Polar	equal	Converged
FIQGEU_FSR	['12']	[30]	[2]	[2, 2]	[30 30]	vasp	[2.319]	0	-1e-05	-1e-05	0	-0.0422	0	0.00424	-0.01186	-0.01816	0.0447	0	0	0.00187	0.20743	0.11236	0	0	0	0.236712	mm2	C64-H44-N8-O8-Zn2	0.0868266	0.209021	['[Zn]']	['[O-]C(=O)c1ccc(cc1)c1ccc(cc1)n1cncc1']	126	1.48613	Polar	equal	Converged
XEZMIA_FSR	['12']	[30]	[2]	[2, 2]	[30 30]	vasp	[2.334]	-0.11674	-0.03235	-0.08288	0	-0.03433	0	0.00017	1e-05	6e-05	-0.01752	0.00011	-0.01002	-0.17688	-0.01865	0.05159	0	-0.09553	0	0.236261	m	Zn2-H22-C30-N2-O12	0.210112	0.242205	['[OH2][Zn]']	['O=C(c1ccc(cc1)C(=O)[O-])Nc1ccc(cc1)C(=O)[O-]']	68	1.78683	Polar	equal	Converged
HAYQIK_FSR	['fblock']	[57]	[3]	[3, 3]	[57 57]	vasp	[4.795]	-0.00018	0.04467	0.00764	0	-0.12996	0	2e-05	1e-05	1e-05	-0.03932	2e-05	0.05783	-0.08952	-0.08609	-0.1362	0	0.10931	0	0.236216	m	C48-H60-La2-N6-O26	0.0782984	0.249505	['[La]']	['COc1cc(cc(c1c1c(OC)cc(cc1OC)C(=O)[O-])OC)C(=O)[O-]']	142	1.57611	Polar	equal	Converged
DERYAB_FSR	['10', '12']	[28, 30]	[2, 2]	[2, 2, 2]	[28 28 30]	vasp	[1.949, 2.329]	0.00025	7e-05	-6e-05	0.05219	-1e-05	-0.02005	-0.02637	-0.22526	-0.06449	0	0.00952	0	-5e-05	-3e-05	0	-0.03015	0	0.05574	0.235981	2	C18-H30-Ni2-O24-Zn1	0.0179171	0.235467	['[OH2][Ni]([OH2])([OH2])[OH2]']	['[O-]C(=O)c1cc(cc(c1)C(=O)[O-])C(=O)[O-]', '[O-]C(=O)c1cc(cc(c1)C(=O)[O-])[C]1O[Zn](O1)([OH2])([OH2])([OH2])[OH2]']	75	2.06001	Polar	equal	Converged
MOGVIO_FSR	['12']	[48]	[2]	[2, 2, 2, 2]	[48 48 48 48]	vasp	[2.598]	-9e-05	-3e-05	-0.00031	0	-0.09083	0	0	0	0	0.01029	0	0	-0.06523	-0.15134	-0.16847	0	0	0	0.235671	mm2	Cd4-H16-C8-S4-N16-O16	0.03589	0.256145	['[Cd]']	['Nc1n[nH]cn1', '[O]S(=O)(=O)[O]']	64	3.06665	Polar	equal	Converged
JISKUU_FSR	['12']	[30]	[2]	[2, 2]	[30 30]	vasp	[2.168]	1e-05	2e-05	-0.00013	0.0439	6e-05	0.02224	0.00356	-0.23058	-0.01271	0	-0.04668	0	0	-5e-05	5e-05	0.00159	0	-0.02352	0.235628	2	Zn2-H24-C28-N12-O8	0.0853227	0.238147	['[Zn]']	['[O-]C(=O)c1ccccc1C(=O)[O-]', 'n1ncn(c1)CCn1cnnc1']	74	1.73901	Polar	equal	Converged
LALKEP_FSR	['7']	[25]	[2]	[2, 2, 2, 2]	[25 25 25 25]	vasp	[2.478]	-1e-05	0	1e-05	0	0.02616	0	6e-05	-0.00016	-0.00023	-0.05645	0	0	-0.01652	-0.03459	-0.23203	0	0	0	0.235175	mm2	Mn4-H12-C28-N4-O16	0.0911697	0.322333	['[Mn]']	['[O-]C(=O)c1cnccc1C(=O)[O-]']	64	2.25868	Polar	equal	Converged
RUSQIG_FSR	['12']	[30]	[2]	[2, 2, 2, 2]	[30 30 30 30]	vasp	[2.511]	0.05311	0.08616	-0.00873	0	0.03939	0	6e-05	0.00011	0.00011	-0.08114	1e-05	0.13824	0.06749	-0.21125	-0.00233	0	-0.01579	0	0.234154	m	C12-H24-N16-O16-Zn4	0.175476	0.35024	['[OH2][Zn][OH2]']	['[O-]C(=O)CC1=NN=N[N]1']	72	2.25965	Polar	equal	Converged
CUQPUB_FSR	['12']	[30]	[2]	[2, 2, 2, 2]	[30 30 30 30]	vasp	[2.08]	-0.15864	-0.02383	-0.07065	0	0.05529	0	-1e-05	0	0	0.00673	0	-0.0377	0.10634	0.04364	0.07974	0	-0.04816	0	0.233899	m	Zn4-H36-C52-N20-O8	0.080057	0.215679	['[Zn]']	['[O-]C(=O)c1cccnc1', 'c1ccc(cc1)C1=NN=N[N]1']	120	1.68749	Polar	equal	Converged
HESMOK_FSR	['12']	[48]	[2]	[2, 2]	[48 48]	vasp	[2.445]	-0.04058	0.0007	0.10735	-0.04253	-0.00415	0.02335	-0.05201	0.02098	-0.03022	0.03005	-0.03482	0.00044	0.16755	0.04097	-0.11803	-0.04454	-0.01923	-0.00735	0.233274	1	Cd2-H30-C24-N2-O16	0.0625249	0.232798	['[OH2][Cd][OH2]']	['CC(C(=O)[O-])[NH2]Cc1cc(cc(c1)C(=O)[O-])C(=O)[O-]']	74	1.89483	Polar	equal	Converged
AFADOD_FSR	['12']	[48]	[2]	[2, 2]	[48 48]	vasp	[2.264]	-2e-05	4e-05	3e-05	0.12473	0	-0.02772	-0.05714	-0.13001	-0.1442	0	0.11514	0	7e-05	6e-05	7e-05	-0.05289	-7e-05	0.00479	0.232849	2	Cd2-H18-C10-Br4-N2-O6	0.0837702	0.234044	['Br[Cd]Br']	['[O-]C(=O)C1CC(C[NH2]1)O']	42	2.91348	Polar	equal	Converged
AFADOD_FSR	['12']	[48]	[2]	[2, 2]	[48 48]	vasp	[2.264]	-2e-05	4e-05	3e-05	0.12473	0	-0.02772	-0.05714	-0.13001	-0.1442	0	0.11514	0	7e-05	6e-05	7e-05	-0.05289	-7e-05	0.00479	0.232849	2	Cd2-H18-C10-Br4-N2-O6	0.0837702	0.234044	['Br[Cd]Br']	['[O-]C(=O)C1CC(C[NH2]1)O']	42	2.91348	Polar	equal	Converged
PASQUX_FSR	['11']	[29]	[2]	[2, 2]	[29 29]	vasp	[1.354]	0.11165	0.185	0.08026	0	-0.02685	0	-3e-05	7e-05	-0.00024	0.03189	-1e-05	0.07185	-0.0098	0.00581	0.04304	0	0.01124	0	0.23247	m	C24-Cu2-H20-N4-O12	0.0718077	0.217799	['[OH2][Cu]']	['COc1ccc(cc1)C1=NC(=C([N]1)C(=O)[O-])C(=O)O']	62	1.9102	Polar	equal	Converged
VIJGUS_FSR	['11']	[29]	[2]	[2, 2, 2, 2]	[29 29 29 29]	vasp	[1.904]	6e-05	0.00013	0.00017	-0.11479	0	0	-1e-05	-1e-05	1e-05	0	-0.13811	0	0	0	4e-05	0	0	-0.2324	0.2324	222	Cu4-H16-C16-O24	0.12598	0.10642			60	2.63676	Non-polar	equal	Converged
XUNTUX_FSR	['1']	[3]	[1]	[1, 1]	[3 3]	vasp	[1.134]	0.14473	0.17709	0.02067	0	-0.00919	0	1e-05	3e-05	1e-05	-0.03938	3e-05	0.06681	-0.00094	0.04379	0.0122	0	0.08614	0	0.232264	m	C12-H12-Li2-N2-O6	0.0675673	0.252168	['O', '[Li]']	['[O-]C(=O)c1ccncc1']	34	1.41592	Polar	equal	Converged
MAKYOM02_FSR	['6']	[42]	[6]	[6, 6, 6]	[42 42 42]	vasp	[5.348]	-0.00014	1e-05	0.00011	-0.02202	4e-05	0.11816	-0.0018	-0.22825	0.03744	0	0.00671	0	0.00012	-0.0001	9e-05	-0.08082	1e-05	-0.13387	0.231405	2	C24-H16-Mo3-N4-O9	0.0571148	0.244532	['[Mo]', '[O]']		56	2.00526	Polar	equal	Converged
KOGBUF_FSR	['1']	[19]	[1]	[1, 1, 1, 1]	[19 19 19 19]	vasp	[1.333]	1e-05	-1e-05	-8e-05	0	-0.06903	0	0.00049	0.00016	0.0001	-0.07132	0	0	-0.18757	-0.08047	0.10746	0	0	0	0.230664	mm2	K4-H12-C12-N16-O20	0.02023	0.235527	['[OH2][K]']	['O=N(=O)C1=C([N]C=N1)N(=O)=O', 'O=N(=O)C1=NC=N[C]1N(=O)=O']	64	1.84095	Polar	equal	Converged
IJUTAK_FSR	['8']	[26]	[3]	[3, 3, 3, 3]	[26 26 26 26]	vasp	[1.1]	-1e-05	-1e-05	-1e-05	0	-0.03788	0	8e-05	-0.00015	-0.0002	-0.14971	0	0	-0.01804	-0.22418	-0.04976	0	0	0	0.230344	mm2	Fe4-H36-C28-N4-O28	0.147716	0.346207	['[OH2][Fe]([OH2])[OH2]']	['[O-]C(=O)c1ncccc1C(=O)[O-]']	100	2.07809	Polar	equal	Converged
FEHJIN01_FSR	['12']	[30]	[2]	[2, 2, 2, 2]	[30 30 30 30]	vasp	[2.229]	0	0	-1e-05	0	-0.12296	0	0	0	0	0.05769	0	0	-0.15295	-0.11421	-0.12749	0	0	0	0.229546	mm2	Zn4-P4-H40-C36-N4-O20	0.0840928	0.292713	['[Zn]']	['[O-]C(=O)c1ccc(cc1)C[NH2]CP(=O)([O])[O]']	108	1.94296	Polar	equal	Converged
CUCLPY_FSR	['11']	[29]	[1]	[1, 1]	[29 29]	vasp	[0.735]	0	1e-05	-2e-05	0.01132	-1e-05	0.031	-0.0854	-0.15234	-0.14257	0	0.04306	0	0	1e-05	0	-0.04062	0	-0.02225	0.229523	2	Cu2-H10-C10-N2-Cl2	0.0448215	0.205351			26	2.15311	Polar	equal	Converged
KEBSOA_FSR	['fblock']	[57]	[3]	[3, 3]	[57 57]	vasp	[4.52]	-0.12454	-0.09885	-0.03783	0	-0.03976	0	8e-05	0.0001	0	0.00887	0	-0.0262	0.0619	0.16152	-0.02116	0	0.00408	0	0.22891	m	C18-H30-La2-O24	0.240959	0.276149	['[OH2][La]([OH2])([OH2])([OH2])([OH2])[OH2]']	['[O-]C(=O)c1cc(cc(c1)C(=O)[O-])C(=O)[O-]']	74	2.3088	Polar	equal	Converged
YAFZUB_FSR	['12']	[30]	[2]	[2, 2]	[30 30]	vasp	[2.356]	0.04775	0.16381	0.07588	0	-0.0143	0	-1e-05	0	2e-05	0.05657	1e-05	0.11964	0.04282	0.10663	0.0588	0	0.05176	0	0.227459	m	C14-H24-O20-S2-Zn2	0.286219	0.268388	['[OH2][Zn]([OH2])([OH2])[OH2]']	['[O-]C(=O)c1cc(ccc1O)S([O])([O])[O]']	62	1.97984	Polar	equal	Converged
EKEKEL_FSR	['12']	[30]	[2]	[2, 2, 2, 2, 2, 2, 2, 2, 2, 2, 2, 2]	[30 30 30 30 30 30 30 30 30 30 30 30]	vasp	[2.435]	-3e-05	-2e-05	-8e-05	0	0.16459	0	2e-05	1e-05	1e-05	-0.10991	0	0	-0.00488	-0.19826	-0.10933	0	0	0	0.226459	mm2	Zn12-P8-H32-C56-O40	0.154964	0.289375	['[Zn]']	['[O-]C(=O)c1ccc(cc1)P(=O)([O])[O]']	148	2.35887	Polar	equal	Converged
HAQFAI_FSR	['11']	[29]	[1]	[1, 1]	[29 29]	vasp	[0.622]	-0.06007	-0.08468	0.06971	0	0.05265	0	4e-05	-7e-05	-4e-05	-0.05496	0	0.01683	0.01426	0.0725	0.20126	0	-0.07016	0	0.226335	m	C18-Cu2-H20-N6-O8-S2	0.187278	0.397067	['[Cu]']	['C=CCn1nc2c(n1)cccc2']	56	1.91865	Polar	equal	Converged
OBERUL_FSR	['12']	[30]	[2]	[2]	[30]	vasp	[2.244]	0.00131	0.01697	-0.01276	-0.03107	0.00344	0.02489	0.02674	-0.19941	-0.02038	0.04213	-0.03031	-0.07252	-0.01105	0.04774	-0.03698	-0.01159	0.00288	-0.01662	0.226331	1	Zn1-H12-C16-N2-O8	0.164199	0.215864	['[Zn]']	['[O-]C(=O)CN1[CH]C=C(C=C1)C(=O)[O-]']	39	1.71138	Polar	equal	Converged
MASXUA_FSR	['12']	[30]	[2]	[2, 2]	[30 30]	vasp	[2.247]	0	-1e-05	0	-0.04283	0	0.01404	0.05504	0.18948	0.09856	0	-0.04776	0	0	0	0	0.02958	0	0.00186	0.22567	2	Zn2-H44-C46-N8-O8	0.0925044	0.269115			108	1.66505	Polar	equal	Converged
QUMVOK_FSR	['12']	[80]	[2]	[2, 2]	[80 80]	vasp	[2.267]	3e-05	1e-05	2e-05	0	-0.04782	0	-1e-05	0	0	-0.11612	0	0	-0.16597	-0.09892	-0.11552	0	0	0	0.225113	mm2	C16-H16-Hg2-N8-S4	0.0797841	0.224182			46	2.49524	Polar	equal	Converged
DEPHUC01_FSR	['3']	[39]	[3]	[3, 3, 3, 3]	[39 39 39 39]	vasp	[3.906]	-3e-05	-0.0001	1e-05	0	0.14553	0	1e-05	-1e-05	0	0.0755	0	0	0.10251	0.16735	0.11028	0	0	0	0.225113	mm2	Y4-H44-C32-S4-O44	0.10814	0.25698	['[OH2][Y]([OH2])([OH2])[OH2]']	['[O-]C(=O)c1cc(cc(c1)S([O])([O])[O])C(=O)[O-]']	128	2.23592	Polar	equal	Converged
GISJUO01_FSR	['12']	[48]	[2]	[2, 2, 2, 2]	[48 48 48 48]	vasp	[2.395]	0	0	0	0	0.00648	0	5e-05	4e-05	7e-05	-0.03043	0	0	-0.00362	-0.2195	-0.04627	0	0	0	0.224353	mm2	Cd4-H36-C28-N4-O28	0.0315301	0.238073	['[OH2][Cd]([OH2])[OH2]']	['[O-]C(=O)c1ncccc1C(=O)[O-]']	100	2.21925	Polar	equal	Converged
CEKYEY_FSR	['12']	[48]	[2]	[2, 2, 2, 2]	[48 48 48 48]	vasp	[2.659]	0	0	0	0	-0.0054	0	0	0	0	-0.09844	0	0	-0.04965	-0.11489	0.1859	0	0	0	0.224106	mm2	Cd4-H40-C48-N8-O24	0.0756004	0.178199	['[OH2][Cd]']	['[O-]C(=O)c1ccc[nH]c1=O', '[O-]C(=O)c1ccncc1']	124	1.86979	Polar	equal	Converged
WUGLOA_FSR	['2']	[20]	[2]	[2]	[20]	vasp	[2.838]	0.00057	0	0.00038	-0.0257	-0.00028	0.03537	-0.12451	0.11402	-0.1253	0	-0.07649	0	9e-05	-1e-05	3e-05	-0.0113	-3e-05	-0.00532	0.223728	2	C10-Ca1-H12-N4-O8	0.02917	0.195944			35	1.682	Polar	equal	Converged
XIVLUK_FSR	['13']	[49]	[3]	[3, 3, 3, 3]	[49 49 49 49]	vasp	[3.415]	2e-05	-5e-05	0	0.07456	0	0	-3e-05	4e-05	1e-05	0	0.07456	0	2e-05	2e-05	7e-05	0	0	0.2228	0.2228	-42m	C8-H12-In4-O20	0.04504	0.2393	['[In]', '[OH]']	['[O-]C=O']	44	3.05447	Non-polar	equal	Converged
QEYZAY01_FSR	['12']	[30]	[2]	[2]	[30]	vasp	[2.15]	-0.00031	-0.00025	-0.00066	-0.11738	0.00013	0.08326	-0.00822	-0.09913	-0.0434	0	0.00158	0	-3e-05	1e-05	0.00017	0.14555	3e-05	-0.08782	0.22258	2	C22-H26-N4-O8-Zn1	0.0515338	0.206079	['[Zn]']	['NCC(=O)NC(C(=O)[O-])Cc1ccc(cc1)O']	61	1.63096	Polar	equal	Converged
PIGPUQ01_FSR	['1']	[3]	[1]	[1, 1]	[3 3]	vasp	[1.174]	-0.05213	-0.00665	-0.02659	-0.02711	-0.04216	-0.01861	-0.05281	-0.18135	-0.06507	0.00129	-0.08203	-0.02259	-0.00192	0.00555	-0.02612	-0.01351	-0.02421	-0.01006	0.222515	1	Li2-H18-C12-O16	0.0208222	0.207368	['[Li][OH2]']	['[O-]C(=O)C(CC(=O)O)(CC(=O)O)O']	48	1.73598	Polar	equal	Converged
VUWXUJ01_FSR	['12']	[30]	[2]	[2, 2, 2, 2, 2, 2]	[30 30 30 30 30 30]	vasp	[1.997]	0.01032	-0.01045	-0.00036	-0.00633	-0.00225	-0.02809	-0.02608	0.02561	-0.00058	-0.00179	0.00641	-0.01023	0.01635	0.01635	-0.2213	0	0	0	0.222506	3	C42-H42-N18-O18-Zn6	0.113841	0.322322	['[Zn]']	['CC(C(=O)[O-])NC(=O)[C]1C=NN=C1', '[O-]C(=O)C(NC(=O)C1=CN=N[CH]1)C', '[O-]C(=O)C(NC(=O)C1=C[N]N=C1)C']	126	1.07242	Polar	equal	Converged
QULNES_FSR	['11']	[29]	[1]	[1, 1, 1, 1, 1, 1]	[29 29 29 29 29 29]	vasp	[0.601]	0.10434	0.0897	-0.0491	0	0.00949	0	0	-3e-05	0	0.01982	0	0.06069	0.01703	0.09805	0.19745	0	0.01116	0	0.221472	m	C10-Cl6-Cu6-H22-N10-S2	0.0850187	0.255637	['Cl[Cu]']	['Cl[Cu][S]1[Cu](Cl)N2N=C1N([N]2)CC[NH](C)C']	56	2.37128	Polar	equal	Converged
DUXZEC_FSR	['11']	[29]	[1]	[1, 1, 1]	[29 29 29]	vasp	[0.414]	0.10021	0.05584	-0.00284	-0.02061	-0.00056	-0.05776	-0.04601	-0.09072	-0.04055	0.03851	-0.02007	0.04398	0.0734	0.04884	0.1001	-0.05461	-0.01618	-0.06023	0.220902	1	Cu3-H10-C16-S3-N7	0.0831053	0.171844	['[Cu]']	['[S]C#N', 'c1ccc(cn1)c1[nH][n-]c(c1)c1cccnc1']	39	2.07514	Polar	equal	Converged
QENFAR_FSR	['12']	[30]	[2]	[2, 2]	[30 30]	vasp	[2.342]	0.00014	0.00013	0.00018	0.06018	-3e-05	-0.0374	-0.02863	-0.21026	-0.04836	0	0.03235	0	0.00016	0.00018	0.00026	-0.04641	-1e-05	-0.00517	0.220032	2	Zn2-H36-C28-N4-O16	0.118688	0.311707	['[OH2][Zn][OH2]']	['CC(C(=O)[O-])NC(=O)c1ccc(cc1)C(=O)NC(C(=O)[O-])C']	86	1.63579	Polar	equal	Converged
EZABEN_FSR	['12']	[48]	[2]	[2, 2, 2, 2, 2, 2]	[48 48 48 48 48 48]	vasp	[2.641]	0	0	0	0	-0.0529	0	0	2e-05	0	0.11615	0	0	-0.03837	0.12066	0.17992	0	0	0	0.220005	mm2	C24-Cd6-Cl6-H40-N22-O4	0.0684998	0.246681	['Cl[Cd]', 'Cl[Cd]Cl', '[Cd]']	['[N]1C=NN=C1']	102	2.21983	Polar	equal	Converged
MOFTIL01_FSR	['12']	[30]	[2]	[2, 2]	[30 30]	vasp	[2.243]	-0.1094	0.17889	0.05011	0	-0.02165	0	0	1e-05	0	-0.02033	0	0.09427	0.0234	0.07503	-0.08002	0	0.03158	0	0.219211	m	Zn2-H8-C16-N8-O4	0.18352	0.377526	['[Zn]']	['[O-]C(=O)c1ccc(cc1)C1=NN=N[N]1']	38	2.01788	Polar	equal	Converged
SANBOZ_FSR	['12']	[30]	[2]	[2, 2]	[30 30]	vasp	[2.403]	0	2e-05	-1e-05	0	-0.06265	0	-8e-05	1e-05	2e-05	-0.00863	0	0	-0.14102	0.1666	0.01176	0	0	0	0.218588	mm2	C12-H20-N4-O10-Zn2	0.08559	0.172647	['[OH2][Zn]']	['C1N2CN3CN1CN(C2)C3', '[O-]C(=O)CC(=O)[O-]']	48	2.03169	Polar	equal	Converged
BERRUN_FSR	['12']	[48]	[2]	[2, 2]	[48 48]	vasp	[2.447]	0.05917	0.17647	-0.01585	0	0.01685	0	4e-05	-8e-05	-4e-05	-0.0112	0	0.10443	-0.00491	-0.11226	-0.06366	0	-0.01318	0	0.217698	m	C16-Cd2-H24-N20-O4	0.0317373	0.220812	['[Cd]']	['CCC(=O)NC1=NN=N[N]1']	66	1.88445	Polar	equal	Converged
VEGYAI_FSR	['13']	[49]	[3]	[3, 3, 3, 3]	[49 49 49 49]	vasp	[3.263]	-8e-05	-4e-05	0.00015	-0.05397	6e-05	0.10757	0.05707	-0.20094	-0.05837	0	0.01198	0	5e-05	-5e-05	-6e-05	0.00036	-7e-05	-0.14784	0.21722	2	In4-H20-C16-O28	0.0710463	0.202939			68	2.68499	Polar	equal	Converged
KDGLUC01_FSR	['1']	[19]	[1]	[1, 1]	[19 19]	vasp	[1.294]	0	-0.00022	7e-05	0.01061	-5e-05	0.04293	0.01187	0.03518	-0.04318	0	0.02319	0	0.00012	-9e-05	-1e-05	-0.20593	3e-05	-0.06418	0.21695	2	K2-H18-C12-O16	0.0569784	0.167052	['[K]']	['OC(C(C(C(C(=O)O)O)O)O)C(=O)[O-]']	48	1.78566	Polar	equal	Converged
FODLEQ03_FSR	['11']	[29]	[1]	[1, 1, 1]	[29 29 29]	vasp	[-0.046]	-0.00226	0.00182	-0.0002	0.0031	-0.02732	-0.0117	-0.01197	0.01133	-0.00034	-0.02735	-0.00315	0.00202	0.12562	0.12562	0.12398	0	0	0	0.216639	3	Cu3-H24-C39-N9	0.0686282	0.149179	['[Cu]']	['[C]#N']	75	1.62389	Polar	equal	Converged
ASEMUG01_FSR	['fblock']	[57]	[3]	[3, 3, 3, 3]	[57 57 57 57]	vasp	[4.446]	8e-05	-0.0001	0.00011	0.13823	0	0	0	0	0	0	0.21542	0	0	0	0	0	0	0.11408	0.21542	222	La4-H32-C24-N4-O28	0.04607	0.16935	['[OH2][La]']	['[O-]C(=O)CN(CC(=O)[O-])CC(=O)[O-]']	92	2.60827	Non-polar	equal	Converged
QAFFOV_FSR	['12']	[48]	[2]	[2, 2, 2, 2]	[48 48 48 48]	vasp	[2.447]	0	1e-05	0	0	0.07944	0	0	-2e-05	-1e-05	0.02706	0	0	0.143	-0.01614	0.16015	0	0	0	0.215308	mm2	Cd4-H24-C36-N12-Cl4-O8	0.11355	0.251978	['Cl[Cd]']	['[O-]C(=O)c1cccc(c1)n1cnnc1']	88	2.20277	Polar	equal	Converged
SAWWOC_FSR	['11']	[29]	[1]	[1, 1, 1, 1]	[29 29 29 29]	vasp	[0.674]	9e-05	9e-05	0.00012	0	0.09623	0	-0.00022	-0.00034	-0.00054	0.08768	0	0	0.0758	0.09848	0.1733	0	0	0	0.213254	mm2	Cu4-H36-C28-Br4-N4	0.0999526	0.294909			76	2.07298	Polar	equal	Converged
CODFEH_FSR	['7']	[25]	[2]	[2, 2, 2, 2]	[25 25 25 25]	vasp	[2.356]	1e-05	-1e-05	0	0.00954	0.08939	7e-05	-1e-05	1e-05	0	0.08939	-0.00954	-7e-05	-0.01209	-0.01209	-0.21239	0	0	0	0.213077	4	Mn4-H32-C16-O28	0.0924863	0.274085	['[OH2][Mn][OH2]']	['[O-]C(=O)CC(C(=O)[O-])O']	80	1.82787	Polar	equal	Converged
FIFPAM_FSR	['10']	[28]	[2]	[2, 2]	[28 28]	vasp	[1.557]	-0.18359	-0.02831	-0.06604	0	0.00301	0	3e-05	0	-3e-05	0.00443	3e-05	-0.03206	0.03419	0.03074	0.10497	0	0.00527	0	0.212307	m	C24-H24-N4-Ni2-O10	0.0718188	0.221385	['[OH2][Ni]']	['[O-]C=O', 'n1ccc(cc1)c1ccncc1']	64	1.40241	Polar	equal	Converged
VEYKAO_FSR	['14']	[50]	[2]	[2, 2, 2, 2]	[50 50 50 50]	vasp	[2.941]	0	0.00011	2e-05	0	-0.0028	0	-6e-05	-6e-05	-0.00012	-0.01425	0	0	-0.13909	-0.12728	-0.09701	0	0	0	0.212031	mm2	Sn4-H12-C28-N4-O20	0.332689	0.457842	['[Sn]']	['Oc1cc(nc(c1)C(=O)[O-])C(=O)[O-]']	68	2.53848	Polar	equal	Converged
SEBTOJ_FSR	['12']	[48]	[2]	[2, 2]	[48 48]	vasp	[2.598]	-8e-05	8e-05	-2e-05	0.11708	-4e-05	-0.02924	0.03626	-0.20556	0.03037	0	0.01459	0	6e-05	0.00028	5e-05	-0.05203	0.00019	0.05127	0.211436	2	Cd2-H16-C14-S2-N8-O10	0.0949793	0.165233	['[OH2][Cd]']	['[O]S(=O)(=O)[O]', 'c1ccc(cn1)n1cnnc1']	52	2.28759	Polar	equal	Converged
TARDOF_FSR	['1']	[11]	[1]	[1, 1]	[11 11]	vasp	[1.26]	-1e-05	-3e-05	-3e-05	0	0.00428	0	3e-05	-0.00022	4e-05	0.20302	0	0	-0.01749	0.20968	-0.01446	0	0	0	0.210906	mm2	C12-H16-N2-Na2-O10	0.18625	0.379751	['O', '[Na]']		42	1.52261	Polar	equal	Converged
AFOVAT_FSR	['fblock']	[57]	[3]	[3, 3]	[57 57]	vasp	[4.865]	0.00013	-0.00304	0.00212	0.02943	0.0002	-0.11813	0.00341	0.18235	0.10452	0	-0.00687	0	0.00101	0.0031	0.00037	-0.03967	0.00057	0.10765	0.210386	2	C44-H28-La2-O16	0.0437547	0.216648	['[La]']	['[O-]C(=O)c1ccc(cc1)c1ccc(cc1)C(=O)[O-]']	90	1.15476	Polar	equal	Converged
MUSHAJ_FSR	['11']	[29]	[1]	[1, 1]	[29 29]	vasp	[0.607]	0.0042	0.01396	-0.0506	0	0.0151	0	0.00041	0.00035	0.00029	-0.00661	0.00018	-0.04096	-0.01063	-0.01081	0.20034	0	0.03325	0	0.209376	m	Br2-C24-Cu2-H16-N4	0.114202	0.253172	['[Cu]Br']	['c1cnc2c(c1)c1cccnc1cc2']	48	2.18251	Polar	equal	Converged
EXERIJ_FSR	['12']	[30]	[2]	[2, 2]	[30 30]	vasp	[2.551]	0	0	0	0.01232	0	-0.01556	-0.00875	-0.20622	-0.03162	0	-0.00275	0	0	0	-1e-05	0.06623	0	0.00986	0.208832	2	Zn2-As2-H32-C36-N6-O10	0.115296	0.258869	['[Zn]']	['[O][As](O)[O]', 'n1ccc(cc1)c1ccncc1']	88	1.92337	Polar	equal	Converged
AVOLAZ_FSR	['1', '12']	[11, 30]	[1, 2]	[1, 2, 2, 2]	[11 30 30 30]	vasp	[1.22, 2.463]	0.08322	0.06044	0.04695	-0.00819	-0.00457	-0.01302	-0.06821	0.09186	-0.05981	0.14433	0.00689	0.0507	0.02515	0.02637	-0.00789	-0.06742	0.03463	-0.01162	0.208365	1	Na1-Zn3-H13-C19-O17	0.0369545	0.203361	['[OH2][Zn][OH2][Na][OH2][Zn]', '[Zn]']	['[O-]C(=O)c1cc(cc(c1)C(=O)[O-])C(=O)[O-]', '[O-]C=O']	53	2.05909	Polar	equal	Converged
DORREI_FSR	['1']	[11]	[1]	[1, 1]	[11 11]	vasp	[1.116]	-0.00603	0.19353	0.0181	-0.03544	0.03474	0.00745	-0.00196	-0.01759	0.00767	0.04242	0.00092	0.15344	-0.00724	0.02837	-0.02368	-0.01728	0.0079	-0.06886	0.207994	1	Na2-H24-C12-S2-O17	0.102545	0.168091	['[Na][OH2][Na]']	['COC1OCC(C(C1O)O)OS(=O)(=O)[O]']	57	1.69788	Polar	equal	Converged
OCORIK01_FSR	['1']	[55]	[1]	[1, 1, 1, 1]	[55 55 55 55]	vasp	[1.347]	1e-05	1e-05	0	0	0.06959	0	0	0	0	0.10544	0	0	-0.10903	0.03272	-0.17347	0	0	0	0.207485	mm2	Cs4-H28-C24-O28	0.0734188	0.184657	['[Cs]']	['[O-]C(=O)C(CC(=O)O)(CC(=O)O)O.[O-]C(=O)C(CC(=O)O)(CC(=O)O)O']	84	2.30706	Polar	equal	Converged
PONTET_FSR	['12']	[48]	[2]	[2, 2, 2, 2]	[48 48 48 48]	vasp	[2.523]	1e-05	1e-05	4e-05	0	-0.12593	0	-0.00045	-0.00038	-0.00087	0.02093	0	0	-0.08987	0.18209	0.03927	0	0	0	0.206823	mm2	C60-Cd4-H40-O24	0.0659403	0.264516	['[OH2][Cd]']	['O=C(c1ccccc1C(=O)[O-])c1ccc(cc1)C(=O)[O-]']	128	2.00282	Polar	equal	Converged
DEHYOF_FSR	['12']	[30]	[2]	[2, 2, 2, 2, 2, 2]	[30 30 30 30 30 30]	vasp	[2.201]	-0.00709	-0.01057	-0.00404	0	-0.00413	0	-4e-05	0.00044	0.00055	0.17965	7e-05	-0.0265	-0.0186	0.15572	0.13195	0	0.02401	0	0.206622	m	C28-H24-N4-O20-P4-Zn6	0.0459839	0.241982	['[Zn]']	['[O-]C(=O)CP(=O)([O])[O]', 'n1ccc(cc1)c1ccncc1']	86	2.18335	Polar	equal	Converged
OJENUO_FSR	['1']	[19]	[1]	[1, 1, 1, 1]	[19 19 19 19]	vasp	[1.29]	0.00019	4e-05	8e-05	0	-0.04123	0	-6e-05	-1e-05	-1e-05	-0.09064	0	0	0.01755	0.08547	0.18671	0	0	0	0.206092	mm2	C8-H4-K4-N8-O8	0.178892	0.149872	['[K]']	['N#C[CH]N(=O)=O']	32	1.70172	Polar	equal	Converged
HACGID_FSR	['13']	[81]	[1]	[1, 1, 1, 1]	[81 81 81 81]	vasp	[1.565]	2e-05	1e-05	4e-05	0.00216	0	-0.06965	-0.0781	-0.18648	-0.00747	0	0.03863	0	1e-05	2e-05	7e-05	-0.00468	-1e-05	0.02299	0.205967	2	Tl4-H32-C20-N4-O16	0.0798682	0.219012			76	2.97343	Polar	equal	Converged
RUYFOH01_FSR	['14']	[50]	[2]	[2, 2]	[50 50]	vasp	[2.912]	1e-05	4e-05	-1e-05	-0.10311	0	0.04554	0.13425	0.12523	0.00299	0	-0.09322	0	-0.00026	3e-05	8e-05	0.00071	-6e-05	-0.10649	0.205924	2	C16-H8-O8-Sn2	0.233298	0.342196	['[Sn]']	['[O-]C(=O)c1ccccc1C(=O)[O-]']	34	2.4152	Polar	equal	Converged
HUHGUN_FSR	['12']	[30]	[2]	[2, 2, 2, 2]	[30 30 30 30]	vasp	[2.116]	-0.00627	0.00283	-0.01065	0	0.12515	0	1e-05	3e-05	0	0.05167	1e-05	0.03211	0.12506	0.06229	0.14868	0	-0.0119	0	0.20562	m	Zn4-H16-C16-N32	0.114737	0.195292	['[Zn]']	['N1=NN=C([N]1)CCC1=NN=N[N]1']	68	1.99717	Polar	equal	Converged
BADBUF_FSR	['12']	[48]	[2]	[2, 2]	[48 48]	vasp	[2.162]	0.04841	0.19067	-0.01055	0	-0.05149	0	0	-2e-05	-1e-05	0.14586	0	-0.08196	0.00812	-0.031	0.03295	0	-0.01152	0	0.205323	m	Br2-C36-Cd2-H30-N24	0.11621	0.243561	['Br[Cd]']	['n1nnn(c1)CC1=Nc2c([N]1)cccc2']	94	1.8522	Polar	equal	Converged
XECSUV_FSR	['1']	[3]	[1]	[1, 1, 1, 1]	[3 3 3 3]	vasp	[1.118]	0.0002	0.00016	0.00013	0	-0.06107	0	0.00036	0.00042	0.00022	-0.20484	0	0	-0.01	-0.02307	-0.01384	0	0	0	0.204841	mm2	Li4-H20-C20-N8-O12	0.0791	0.213951	['O', '[Li]']	['[O-]C(=O)c1cnccn1']	64	1.53315	Polar	equal	Converged
BERSOI_FSR	['12']	[48]	[2]	[2, 2]	[48 48]	vasp	[2.418]	1e-05	0	-3e-05	0	-0.03236	0	1e-05	5e-05	1e-05	-0.09129	0	0	-0.05517	-0.19624	-0.01944	0	0	0	0.204773	mm2	C12-Cd2-H16-N20-O4	0.0409	0.198361	['[Cd]']	['CC(=O)NC1=NN=N[N]1']	54	1.9932	Polar	equal	Converged
TAPXIT01_FSR	['1', 'fblock']	[11, 70]	[1, 3]	[1, 1, 3, 3]	[11 11 70 70]	vasp	[1.28, 4.519]	-2e-05	-1e-05	0	0	0.08455	0	-0.00011	-5e-05	-6e-05	-0.00862	0	0	0.12181	0.05481	0.15457	0	0	0	0.204288	mm2	C56-H32-Na2-O20-Yb2	0.10394	0.242261	['[Na]', '[Yb]']	['[O-]C(=O)c1ccc(cc1)Oc1ccc(cc1)C(=O)[O-]']	112	1.61613	Polar	equal	Converged
MAVSOS_FSR	['12']	[30]	[2]	[2, 2, 2, 2]	[30 30 30 30]	vasp	[2.07]	0	-1e-05	0	0	0.03705	0	0	0	0	0.00773	0	0	0.09676	0.08261	0.15578	0	0	0	0.201133	mm2	Zn4-H24-C32-S8-N16	0.159989	0.244069	['[Zn]']	['S=[C]1=NC=CC=N1']	84	1.9213	Polar	equal	Converged
DAWSEB_FSR	['7']	[25]	[2]	[2, 2]	[25 25]	vasp	[2.427]	4e-05	-4e-05	-1e-05	-0.02266	-4e-05	-0.03786	-0.03415	-0.14333	-0.12794	0	-0.04819	0	-0.00017	-0.00021	-3e-05	-0.1515	-2e-05	0.02794	0.200999	2	Mn2-H16-C18-O12	0.108905	0.212522	['[OH2][Mn]']	['[O-]C(=O)COc1ccccc1C(=O)[O-]']	48	1.91092	Polar	equal	Converged
LORMOU01_FSR	['1']	[11]	[1]	[1, 1]	[11 11]	vasp	[1.14]	-0.00018	-0.00021	-0.00018	0.05492	-4e-05	-0.03307	0.04315	-0.16046	-0.09106	0	0.06675	0	-0.00013	-0.0001	-6e-05	-0.10869	2e-05	0.05666	0.20089	2	Na2-B2-H16-C16-O20	0.197181	0.229768			56	1.70135	Polar	equal	Converged
PELTOQ_FSR	['13']	[49]	[3]	[3, 3, 3, 3]	[49 49 49 49]	vasp	[3.512]	-2e-05	-2e-05	2e-05	0	-0.05356	0	0	-3e-05	1e-05	0.01821	0	0	-0.10226	-0.06692	-0.15942	0	0	0	0.200873	mm2	C32-H28-In4-O24	0.136258	0.274307	['O', '[In]', '[OH]']	['[O-]C(=O)c1ccccc1C(=O)[O-]']	88	2.28204	Polar	equal	Converged
VIHTEL01_FSR	['9']	[27]	[2]	[2, 2]	[27 27]	vasp	[1.585]	-7e-05	4e-05	-4e-05	-0.06761	0	0	8e-05	-0.00011	-7e-05	0	-0.06758	0	2e-05	2e-05	-4e-05	0	0	-0.2002	0.2002	-42m	C16-Co2-H12-N8-O4	0.14982	0.09423	['[Co]']	['O=[C]1=NC=CC=N1']	42	1.78773	Non-polar	equal	Converged
NEVGIE_FSR	['1']	[55]	[1]	[1, 1, 1, 1, 1, 1, 1, 1, 1, 1, 1, 1]	[55 55 55 55 55 55 55 55 55 55 55 55]	vasp	[1.471]	-2e-05	1e-05	-4e-05	0	-0.04863	0	8e-05	5e-05	0.00021	-0.05421	0	0	0.06336	0.03212	0.18647	0	0	0	0.199543	mm2	Cs12-H60-C72-O12	0.07048	0.23053	['[Cs]']	['[O]c1ccccc1']	156	2.18039	Polar	equal	Converged
MISQUB_FSR	['11']	[29]	[2]	[2, 2]	[29 29]	vasp	[1.617]	0.08213	-0.1018	-0.04078	0	-0.06187	0	-2e-05	0	-2e-05	-0.00519	-1e-05	-0.00854	-0.1167	-0.01976	0.11645	0	0.02509	0	0.19888	m	C12-Cu2-H16-N4-O14	0.126417	0.240776	['[OH2][Cu][OH2]']	['[O-]C(=O)c1nccnc1C(=O)[O-]']	48	1.98911	Polar	equal	Converged
CUMBAO_FSR	['12']	[30]	[2]	[2, 2, 2, 2]	[30 30 30 30]	vasp	[2.241]	0	0	0	0	-0.05511	0	-9e-05	-6e-05	-3e-05	-0.02362	0	0	0.0485	0.00989	0.19203	0	0	0	0.198307	mm2	Zn4-H36-C16-N4-O24	0.116086	0.264885	['[OH2][Zn][OH2]']	['[O-]C(=O)CNCC(=O)[O-]']	84	2.16138	Polar	equal	Converged
BOYFUS_FSR	['12']	[48]	[2]	[2, 2, 2, 2]	[48 48 48 48]	vasp	[2.451]	0.00132	0.00077	0.00036	0	-0.11691	0	0.00179	0.00121	0.00042	-0.04402	0	0	-0.00133	-0.04018	-0.19417	0	0	0	0.19829	mm2	C40-Cd4-H20-N12-O16	0.113485	0.30758	['[Cd]']	['[O-]C(=O)C1=NC(=N[C]1C(=O)O)c1ccccn1']	92	2.09249	Polar	equal	Converged
LAMPOG_FSR	['12']	[48]	[2]	[2]	[48]	vasp	[2.32]	-0.00031	9e-05	7e-05	0.10209	4e-05	0.08016	0.10741	0.14692	0.07606	0	0.01815	0	-0.00026	0.00067	0.00054	0.06002	-9e-05	0.05233	0.198084	2	C16-Cd1-H16-O10-S1	0.127794	0.207415	['[OH2][Cd][OH2]']	['[O-]C(=O)COc1ccc(cc1)S(=O)(=O)c1ccc(cc1)OCC(=O)[O-]']	44	1.97035	Polar	equal	Converged
HUHCOD_FSR	['12']	[30]	[2]	[2]	[30]	vasp	[2.159]	-3e-05	0	-0.0001	0.01749	2e-05	-0.10893	-0.1252	-0.1525	-0.00085	0	-0.00738	0	2e-05	1e-05	1e-05	-0.03066	1e-05	0.01756	0.19745	2	C22-H22-N4-O4-Zn1	0.0916477	0.231605			53	1.47662	Polar	equal	Converged
BUTXOE_FSR	['12']	[80]	[1]	[1, 1, 2, 2]	[80 80 80 80]	vasp	[1.631]	0.05628	0.00204	0.03682	0	-0.02325	0	-4e-05	-3e-05	1e-05	0.03462	4e-05	-0.04772	0.11013	0.05944	-0.15048	0	-0.02318	0	0.197217	m	C20-H12-Hg4-N8-O8	0.130105	0.295511	['[Hg][Hg]']	['[O-]C(=O)c1ccncn1']	52	3.29015	Polar	equal	Converged
PONHEG_FSR	['11', '12']	[29, 80]	[2, 2]	[2, 2, 2, 2, 2, 2]	[29 29 80 80 80 80]	vasp	[1.553, 1.982]	0	0	0	-0.00228	0	-0.01825	-0.10388	-0.10389	-0.11805	0	0.05803	0	0	0	0	0.00525	0	0.02295	0.197199	2	Cu2-Hg4-H56-C24-N16-Cl12-O8	0.0134783	0.192749			122	2.55912	Polar	equal	Converged
DAVKAO_FSR	['12']	[30]	[2]	[2, 2]	[30 30]	vasp	[2.157]	0	0	-1e-05	0	-0.0027	0	0	-4e-05	-4e-05	0.09895	0	0	0.00071	0.03583	0.19333	0	0	0	0.196623	mm2	C28-H28-N8-O8-S2-Zn2	0.13654	0.317932	['[Zn]']	['[O]S(=O)(=O)[O]', 'c1cc(cc(c1)Cn1cncc1)Cn1cncc1']	76	1.49007	Polar	equal	Converged
HOSPIQ_FSR	['12']	[80]	[2]	[2, 2, 2, 2]	[80 80 80 80]	vasp	[2.132]	-0.12653	-0.02021	-0.05348	0	0.00415	0	0	1e-05	0	0.00743	0	-0.02307	-0.13797	0.03057	-0.02715	0	0.01706	0	0.196288	m	Hg4-H20-C24-I8-N8-O2	0.154586	0.253583			66	3.5021	Polar	equal	Converged
NAMCUA_FSR	['12']	[30]	[2]	[2, 2]	[30 30]	vasp	[2.161]	0	-2e-05	-7e-05	0.04017	0	-0.04062	-0.06835	-0.11658	0.14091	0	0.01807	0	6e-05	3e-05	-1e-05	-0.08297	3e-05	-0.01542	0.196073	2	Zn2-H18-C10-S2-N2-O10	0.196857	0.1372	['[OH2][Zn]']	['[O-]C(=O)CSCC(C(=O)[O-])N']	44	2.15673	Polar	equal	Converged
LESJID_FSR	['14']	[82]	[2]	[2, 2]	[82 82]	vasp	[3.079]	0.00023	-2e-05	-5e-05	0	-0.00388	0	0.00017	0	0.00013	-0.01016	0	0	-0.0402	-0.08668	-0.17121	0	0	0	0.196067	mm2	C20-Cl4-H20-N4-Pb2	0.05503	0.199236			50	2.32227	Polar	equal	Converged
ELAJUX_FSR	['15']	[83]	[3]	[3, 3]	[83 83]	vasp	[3.145]	-0.0661	-6e-05	0.01488	0	0.01578	0	3e-05	0	0	0.02499	1e-05	-0.01794	-0.0018	0.03084	0.17891	0	-0.07207	0	0.195545	m	Bi2-H38-C24-S2-N4-O8	0.166386	0.238521	['[Bi]']	['[O]S(=O)(=O)[O]']	78	2.04289	Polar	equal	Converged
OZAXET_FSR	['9']	[27]	[2]	[2, 2]	[27 27]	vasp	[2.553]	0.00023	6e-05	-1e-05	-0.05641	4e-05	0.03235	-0.06987	0.1284	0.11057	0	-0.06755	0	-4e-05	0.00011	-0.00015	0.10128	-8e-05	0.01234	0.195338	2	Co2-H20-C26-O12	0.0928699	0.167449	['[OH2][Co]']	['[O-]C(=O)COc1cc2ccccc2cc1C(=O)[O-]']	60	1.88448	Polar	equal	Converged
REHRAY_FSR	['12']	[48]	[2]	[2, 2]	[48 48]	vasp	[2.514]	-0.02618	0.06519	0.05535	0	-0.01564	0	-0.00089	-0.00286	-0.00186	-0.00434	-0.00103	-0.00734	-0.00412	-0.10626	-0.13794	0	-0.03687	0	0.195316	m	C26-Cd2-Cl2-H28-N10-O4	0.0605208	0.226691	['Cl[Cd]']	['[O-]C(=O)C1CCCN1Cc1ccc(cc1)c1nnn[nH]1']	72	1.75575	Polar	equal	Converged
LENRIG_FSR	['12']	[30]	[2]	[2, 2, 2, 2]	[30 30 30 30]	vasp	[2.541]	-0.00012	-0.00082	-9e-05	0	-0.04111	0	-7e-05	-0.00035	-0.00023	0.17505	0	0	0.02855	0.03542	0.18953	0	0	0	0.194915	mm2	C36-F4-H28-N8-O12-S4-Zn4	0.213165	0.366076	['[OH2][Zn]F']	['[O-]C(=O)c1csc(n1)c1ccncc1']	96	1.94103	Polar	equal	Converged
QOJVAM_FSR	['11']	[29]	[1]	[1, 1, 1, 1]	[29 29 29 29]	vasp	[0.517]	0.1048	0.08959	-0.0074	0	-0.03209	0	-1e-05	-3e-05	0	0.01259	2e-05	-0.01957	0.09364	0.08527	-0.01095	0	-0.04241	0	0.19481	m	C68-Cu4-H48-I4-N12	0.0275503	0.193746			136	1.86385	Polar	equal	Converged
PILTEM_FSR	['12']	[80]	[2]	[2, 2, 2, 2]	[80 80 80 80]	vasp	[1.867]	0	0	0	0	0.0559	0	-9e-05	-6e-05	0.00027	0.0075	0	0	0.03585	0.05981	0.18166	0	0	0	0.194584	mm2	Hg4-H12-C12-S8-N8-Cl4	0.23446	0.203295			48	3.30387	Polar	equal	Converged
NIZFEJ_FSR	['1']	[11]	[1]	[1, 1]	[11 11]	vasp	[1.172]	-1e-05	0.00026	0.00019	-0.09021	-5e-05	0.01263	0.05067	0.17563	0.06393	0	-0.01592	0	3e-05	-0.00016	2e-05	-0.00945	-2e-05	0.00558	0.194304	2	Na2-P2-H32-C22-N4-O16	0.0569425	0.165804	['[Na]']	['COC1(OC)C2OP(=O)([O])OCC2Oc2c1nccn2']	78	1.59719	Polar	equal	Converged
NARLEZ_FSR	['12', '6']	[48, 42]	[2, 5]	[2, 2, 5, 5, 5, 5]	[48 48 42 42 42 42]	vasp	[2.176, 2.3]	1e-05	1e-05	-1e-05	0.15132	0	-0.09821	-7e-05	-0.16095	-0.01553	0	-0.0309	0	1e-05	-1e-05	-1e-05	-0.05681	0	0.04461	0.194227	2	Cd2-Mo4-H28-C12-S8-N4-O16	0.0451133	0.185786	['[OH2][Cd][OH2]', '[O][Mo]12S[Mo]2(S1)[O]']	['[O-]C(=O)C(C[S])N']	74	2.64904	Polar	equal	Converged
EGEBIC_FSR	['12']	[30]	[2]	[2, 2, 2, 2]	[30 30 30 30]	vasp	[2.12]	-1e-05	-3e-05	-9e-05	0.19396	0	0	0	0	1e-05	0	0.14758	0	0	0	0	0	0	0.17588	0.19396	222	Zn4-H20-C12-S4-N4-O8	0.07401	0.13384	['[Zn]']	['[O-]C(=O)C(C[S])N']	52	2.55084	Non-polar	equal	Converged
OPEMIG_FSR	['12']	[48]	[2]	[2, 2]	[48 48]	vasp	[2.566]	-1e-05	0.0001	0	0.09914	7e-05	0.03337	-0.05192	-0.13715	-0.07817	0	-0.09967	0	-6e-05	0	-4e-05	0.11648	-2e-05	-0.0479	0.193779	2	Cd2-P8-H40-C12-N4-O24	0.0667114	0.24351	['[Cd]']	['C[NH](C(P(=O)(O)O)P(=O)(O)[O])C', 'C[NH](C(P(=O)(O)O)P(=O)([O])O)C', 'C[NH](C(P(=O)(O)[O])P(=O)([O])[O])C']	90	2.22914	Polar	equal	Converged
LOVTOF_FSR	['11']	[29]	[1]	[1, 1, 1, 1, 1, 1]	[29 29 29 29 29 29]	vasp	[0.496]	0.11863	0.13938	0.05037	0	-0.00606	0	-9e-05	-6e-05	-0.0001	0.0576	3e-05	-0.01419	0.04232	0.00991	0.00268	0	-0.0071	0	0.193128	m	Cu6-H12-C16-S6-N10	0.0972315	0.205729	['[Cu]']	['Cc1ccncn1', '[S]C#N']	50	2.32777	Polar	equal	Converged
LMETZN_FSR	['12']	[30]	[2]	[2, 2]	[30 30]	vasp	[2.147]	1e-05	0	1e-05	0.05338	0	0.11479	0.09325	0.15159	0.02263	0	0.06957	0	0	0	1e-05	0.064	-1e-05	0.02393	0.192425	2	Zn2-H40-C20-S4-N4-O8	0.024871	0.201537	['[Zn]']	['[O-]C(=O)C(CCSC)N']	78	1.74618	Polar	equal	Converged
QEHJIX_FSR	['2']	[56]	[2]	[2, 2]	[56 56]	vasp	[2.799]	-0.00021	1e-05	-0.00014	0.05073	-0.00017	0.02722	0.13576	0.03913	0.04944	0	0.1197	0	-0.00019	3e-05	-0.00015	-0.02777	-0.00016	0.04252	0.191662	2	Ba2-H20-C20-O14	0.0544329	0.221578	['[OH2][Ba]']	['[O-]C(=O)COc1ccc(cc1)OCC(=O)[O-]']	56	2.15578	Polar	equal	Converged
RIHMIG_FSR	['12']	[48]	[2]	[2, 2]	[48 48]	vasp	[2.643]	0	0	-1e-05	0	0.01579	0	0	-1e-05	-3e-05	-0.05384	0	0	0.03728	-0.09974	-0.15661	0	0	0	0.189379	mm2	C34-Cd2-H40-N8-O12-S2	0.106523	0.262373			98	1.794	Polar	equal	Converged
SRFORA04_FSR	['2']	[38]	[2]	[2, 2, 2, 2]	[38 38 38 38]	vasp	[2.578]	5e-05	3e-05	3e-05	-0.18869	0	0	-9e-05	-3e-05	-0.0001	0	0.03375	0	-1e-05	1e-05	3e-05	0	0	-0.17378	0.18869	222	Sr4-H8-C8-O16	0.13382	0.3076	['[Sr]']	['[O-]C=O']	36	2.67926	Non-polar	equal	Converged
YOVZAL_FSR	['11']	[29]	[1]	[1, 1, 1, 1]	[29 29 29 29]	vasp	[-0.007]	-0.13236	-0.01819	0.02666	0	0.00211	0	4e-05	0	-7e-05	-0.02168	4e-05	0.06657	0.06192	0.1262	-0.06885	0	-0.04424	0	0.18853	m	Cu4-H20-C28-N12-O2	0.184126	0.221274			66	1.71137	Polar	equal	Converged
NAPTAA_FSR	['12']	[48]	[2]	[2, 2]	[48 48]	vasp	[2.024]	-0.10012	0.00587	0.04681	0	-0.06451	0	5e-05	0	0	0.06964	-1e-05	0.00883	-0.15351	-0.02389	-0.03378	0	-0.00494	0	0.18845	m	Cd2-H20-C16-N8-Cl4	0.0600375	0.198257	['Cl[Cd]Cl']	['Cn1ccnc1c1nccn1C']	50	1.93761	Polar	equal	Converged
MUSDUA_FSR	['11']	[29]	[2]	[2, 2]	[29 29]	vasp	[1.856]	-0.0886	0.04232	-0.01886	0	0.07473	0	3e-05	0	0	0.01386	0	0.01414	0.1358	0.08217	0.03879	0	-0.03794	0	0.188441	m	C48-Cu2-H40-N4-O18	0.0727805	0.17971			112	1.68135	Polar	equal	Converged
HAMQIY_FSR	['12']	[48]	[2]	[2]	[48]	vasp	[2.856]	-0.00075	-0.00018	0.00024	0.00961	-4e-05	-0.01705	-0.1334	0.04336	-0.12425	0	-0.01516	0	0.00053	7e-05	-0.00019	-0.01184	9e-05	0.01047	0.187999	2	C16-Cd1-H10-N10	0.0841543	0.162903	['[Cd]']	['N#C[N]C#N', 'c1ccc(cn1)[CH][N][N][CH]c1cccnc1']	37	1.79534	Polar	equal	Converged
AXUVEW_FSR	['12']	[48]	[2]	[2, 2, 2, 2]	[48 48 48 48]	vasp	[2.559]	4e-05	0	0	-0.02082	-1e-05	0.09862	0.13952	0.09679	0.06949	0	-0.03481	0	1e-05	5e-05	4e-05	0.00568	2e-05	0.0132	0.186748	2	Cd4-H12-C18-N14-Cl6	0.0457177	0.182631	['Cl[Cd]', 'Cl[Cd]Cl']	['N1=NN=C([N]1)c1ccc(cc1)n1ncnc1']	54	2.52505	Polar	equal	Converged
ERIVEI_FSR	['7']	[25]	[2]	[2, 2]	[25 25]	vasp	[0.241]	0.00238	0.00999	0.00601	0	-0.18491	0	-1e-05	-2e-05	-1e-05	-0.09161	0	0	-0.04998	-0.08054	-0.12765	0	0	0	0.186115	mm2	C76-H44-Mn2-N8-O8	0.0751645	0.169754			138	1.35365	Polar	equal	Converged
GOGHAM_FSR	['12']	[30]	[2]	[2, 2]	[30 30]	vasp	[2.265]	0	0	-1e-05	-0.03047	0	-0.04731	-0.03976	-0.11319	-0.14163	0	-0.01187	0	0	0	-1e-05	-0.05706	0	0.00915	0.185991	2	Zn2-H34-C32-S2-N2-O8	0.107142	0.258438	['[Zn]']	['[O-]C(=O)C(N=Cc1c([O])ccc2c1cccc2)C']	80	1.57333	Polar	equal	Converged
LOSGIL_FSR	['12']	[30]	[2]	[2, 2]	[30 30]	vasp	[1.974]	-0.12115	0.04559	-0.12578	-0.00061	0.00434	-0.00046	-0.01377	-0.01201	-0.01331	-0.04064	0.00132	-0.10104	0.05934	-0.04295	-0.02856	-0.0013	-0.06485	8e-05	0.185437	m	C14-Cl2-H12-N10-Zn2	0.0819574	0.235564	['Cl[Zn]']	['c1ccc(cn1)CC1=NN=N[N]1']	40	1.83387	Polar	equal	Converged
PIHWAG_FSR	['fblock']	[57]	[3]	[3, 3]	[57 57]	vasp	[4.771]	0.10164	0.13036	0.06844	0	-0.02971	0	7e-05	0.00029	0.00018	0.0476	-1e-05	0.01119	0.02799	0.01648	0.03807	0	0.03689	0	0.185153	m	C48-H32-La2-N2-O14-S6	0.178397	0.223981	['[La]']	['[O-]C(=O)c1ccc(s1)c1cc(cc(c1)c1ccc(s1)C(=O)[O-])c1ccc(s1)C(=O)[O-]']	104	1.43686	Polar	equal	Converged
AVUJOQ_FSR	['12']	[48]	[2]	[2, 2, 2, 2]	[48 48 48 48]	vasp	[2.351]	1e-05	-1e-05	0	0	-0.0342	0	-1e-05	1e-05	0	0.0342	0	0	0.13089	-0.13089	0	0	0	0	0.185106	-42m	Cd4-H24-C48-N8-O16	0.275941	0.461048	['[Cd]']	['[O-]C(=O)c1cccnc1c1ncccc1C(=O)[O-]']	100	2.11566	Non-polar	equal	Converged
FOHCIP_FSR	['12', '12']	[48, 80]	[2, 2]	[2, 2, 2, 2, 2, 2, 2, 2]	[48 48 48 48 80 80 80 80]	vasp	[3.034, 1.889]	0	4e-05	0	0	0.04035	0	2e-05	-1e-05	-3e-05	0.04625	0	0	-0.04436	-0.17873	0.01372	0	0	0	0.184663	mm2	Cd4-Hg4-H40-C32-S16-N24-O8	0.0804795	0.236255	['[Cd]', '[Hg]']	['[S]C#N']	128	2.36087	Polar	equal	Converged
ESOMAC_FSR	['14']	[50]	[4]	[4, 4]	[50 50]	vasp	[3.06]	0	1e-05	1e-05	-0.01453	-1e-05	-0.01111	-0.05315	-0.15081	-0.09072	0	-0.01618	0	0	1e-05	0	0.0119	0	-0.02326	0.184555	2	Sn2-H62-C50-N2-O6	0.0530477	0.190104			122	1.49662	Polar	equal	Converged
AQOROP_FSR	['12']	[30]	[2]	[2, 2]	[30 30]	vasp	[2.337]	0.09166	-0.14941	-0.04386	0	0.00433	0	-0.00011	-0.00056	0.00012	0.02385	0.0001	-0.07775	-0.02126	-0.07291	0.07647	0	-0.03145	0	0.184539	m	Zn2-H12-C24-N8-O4	0.14153	0.305088	['[Zn]']	['[O-]C(=O)c1ccc2c(c1)ccc(c2)C1=NN=N[N]1']	50	1.87456	Polar	equal	Converged
RIFQUU_FSR	['12']	[30]	[2]	[2, 2]	[30 30]	vasp	[2.253]	0	1e-05	1e-05	0.0054	0	-0.01255	0.03902	-0.15769	0.07912	0	-0.03715	0	-2e-05	-2e-05	0	0.02889	0	-0.0048	0.184469	2	Zn2-H20-C12-S2-N4-O14	0.0734787	0.168579	['[OH2][Zn][OH2]']	['[O]S(=O)(=O)[O]']	54	1.95217	Polar	equal	Converged
BERROH_FSR	['7']	[25]	[2]	[2, 2]	[25 25]	vasp	[2.349]	-0.07349	-0.14773	0.03474	0	-0.00352	0	7e-05	-1e-05	-4e-05	0.02479	5e-05	-0.1129	-0.00702	0.09129	0.04301	0	-0.01323	0	0.18435	m	C16-H24-Mn2-N20-O4	0.0538231	0.215749	['[Mn]']	['CCC(=O)NC1=NN=N[N]1']	66	1.677	Polar	equal	Converged
SEYFAD01_FSR	['12']	[48]	[2]	[2, 2]	[48 48]	vasp	[2.444]	-0.01943	-0.00444	-0.0101	0.00389	-0.00804	-0.00183	-0.0428	-0.01395	0.06251	0.02997	-0.04469	-0.07287	-0.05733	-0.0263	0.06652	0.01932	-0.06904	-0.07988	0.183911	1	Cd2-H8-C4-O12	0.0232859	0.165554	['[OH2][Cd][OH2]']	['[O-]C(=O)C(=O)[O-]']	26	2.5107	Polar	equal	Converged
DOZZOI_FSR	['12']	[48]	[2]	[2, 2, 2, 2]	[48 48 48 48]	vasp	[2.605]	1e-05	0	-2e-05	0	0.01164	0	0	1e-05	1e-05	-0.16024	0	0	0.1777	0.04456	0.00739	0	0	0	0.183351	mm2	C20-Cd4-H32-N16-O4-S8	0.0765084	0.148914	['[OH2][Cd]']	['C1N2CN3CN1CN(C2)C3', '[S]C#N']	84	2.10951	Polar	equal	Converged
MUFHAX_FSR	['12']	[48]	[2]	[2, 2, 2, 2]	[48 48 48 48]	vasp	[2.72]	0	0	0	0	0.15207	0	2e-05	-2e-05	3e-05	0.03848	0	0	0.10555	0.0712	0.13187	0	0	0	0.183303	mm2	C24-Cd4-H20-N36	0.078627	0.150199	['[Cd]']	['Nn1c(nnc1c1cccnc1)c1cccnc1', '[N][N][N]']	84	2.15387	Polar	equal	Converged
CARFAD_FSR	['14']	[50]	[4]	[4, 4, 4, 4]	[50 50 50 50]	vasp	[2.924]	2e-05	-3e-05	3e-05	0	0.024	0	5e-05	-4e-05	6e-05	0.02825	0	0	0.01037	0.04099	0.17831	0	0	0	0.183254	mm2	C24-H32-N8-S8-Sn4	0.04239	0.174565	['[Sn]']	['[S]C(=S)[C]1C=NC=N1']	76	1.24871	Polar	equal	Converged
BIYXEN_FSR	['12', '6']	[30, 42]	[2, 5]	[2, 2, 5, 5, 5, 5]	[30 30 42 42 42 42]	vasp	[1.975, 2.249]	5e-05	-6e-05	6e-05	0.15079	3e-05	-0.03371	0.06919	-0.16661	-0.01574	0	-0.02289	0	-4e-05	-5e-05	5e-05	-0.04693	-2e-05	0.02907	0.182532	2	Zn2-Mo4-H28-C12-S8-N4-O16	0.0411706	0.165819	['[OH2][Zn][OH2]', '[O][Mo]12S[Mo]2(S1)[O]']	['[O-]C(=O)C(C[S])N']	74	2.50675	Polar	equal	Converged
CESZIM_FSR	['12']	[80]	[2]	[2, 2]	[80 80]	vasp	[2.229]	-0.13015	0.04328	-0.00797	0	0.0485	0	9e-05	-6e-05	-5e-05	0.02896	-1e-05	0.00923	0.0564	-0.02204	0.12271	0	-0.05324	0	0.182343	m	Br2-C12-H6-Hg2-N8-S4	0.0956492	0.206261			34	2.93756	Polar	equal	Converged
ROSKOB_FSR	['12']	[30]	[2]	[2, 2, 2, 2]	[30 30 30 30]	vasp	[2.152]	0	-1e-05	-1e-05	0	0.03358	0	0	0	0	0.0848	0	0	0.09232	0.10285	-0.11843	0	0	0	0.182008	mm2	Zn4-H24-C36-N16-O8	0.154575	0.32991	['[Zn]']	['[O-]C(=O)Cc1cccc(c1)C1=NN=N[N]1']	88	1.86819	Polar	equal	Converged
RIFRAB_FSR	['12']	[48]	[2]	[2, 2]	[48 48]	vasp	[2.415]	2e-05	0	1e-05	0.00289	-1e-05	-0.0024	0.03262	0.07961	-0.15693	0	-0.03228	0	1e-05	-3e-05	2e-05	-0.02049	-1e-05	-0.00559	0.181854	2	Cd2-H16-C12-S2-N4-O12	0.0886864	0.132801	['[OH2][Cd]']	['[O]S(=O)(=O)[O]']	48	2.28684	Polar	equal	Converged
TAPQUZ_FSR	['12']	[30]	[2]	[2, 2]	[30 30]	vasp	[2.461]	6e-05	0.00013	6e-05	0.00052	2e-05	-0.02672	-0.03091	-0.17	-0.0553	0	-0.00136	0	-7e-05	0.00011	2e-05	0.00965	-0.00012	-0.00292	0.181426	2	Zn2-H28-C32-O12	0.103683	0.216695	['[OH2][Zn]']	['CC(C(=O)[O-])Oc1ccc(cc1)c1ccc(cc1)C(=O)[O-]']	74	1.80217	Polar	equal	Converged
OVUNID_FSR	['1']	[3]	[1]	[1, 1, 1]	[3 3 3]	vasp	[1.111]	0.01881	-0.01936	-0.00012	-0.00564	-0.0088	0.00019	-0.00016	0.00021	0.00013	-0.00908	0.00584	-0.01928	-0.02291	-0.02291	-0.17846	0	0	0	0.181377	3	Li3-H39-C42-N18	0.0564937	0.197376			102	1.2773	Polar	equal	Converged
TAKRIJ_FSR	['12']	[30]	[2]	[2, 2]	[30 30]	vasp	[2.176]	-2e-05	1e-05	2e-05	0.08498	1e-05	0.0416	0.02692	-0.04224	-0.16996	0	0.03867	0	0	1e-05	1e-05	-0.06652	1e-05	-0.06251	0.181358	2	Zn2-H36-C20-N8-O12	0.0129663	0.19183	['[Zn]']	['NC(=O)CCC(C(=O)[O-])N']	78	1.80266	Polar	equal	Converged
XALXIS01_FSR	['12']	[30]	[2]	[2, 2, 2, 2]	[30 30 30 30]	vasp	[2.301]	-0.00013	-0.00023	-0.00041	-0.18088	0	0	0	0	0	0	-0.09507	0	0	0	0	0	0	0.00384	0.180881	222	Zn4-H16-C24-N16-O8	0.07551	0.2503	['[Zn]']	['[N][N][N]', '[O-]C(=O)c1cccnc1']	68	1.9775	Non-polar	equal	Converged
QEYZAY02_FSR	['12']	[30]	[2]	[2]	[30]	vasp	[2.174]	-0.0001	-7e-05	0.0002	-0.07172	0.00066	-0.03184	-0.12351	-0.12579	-0.02344	0	0.02905	0	0.00013	0.00013	4e-05	0.07421	-7e-05	0.01209	0.180198	2	C22-H26-N4-O8-Zn1	0.111208	0.222811	['[Zn]']	['NCC(=O)NC(C(=O)[O-])Cc1ccc(cc1)O']	61	1.67472	Polar	equal	Converged
ODOSEI_FSR	['1']	[11]	[1]	[1, 1]	[11 11]	vasp	[1.182]	2e-05	-1e-05	3e-05	0.00038	0	-0.04977	-0.09462	-0.13062	0.07899	0	-0.00954	0	0	1e-05	-2e-05	0.04375	3e-05	-0.00549	0.179847	2	Na2-H26-C12-S2-O18	0.100381	0.242187	['[Na]']	['OCC(C(C(C(C(S([O])([O])[O])O)O)O)O)O']	60	1.86207	Polar	equal	Converged
ALIMEP_FSR	['12']	[48]	[2]	[2, 2, 2, 2]	[48 48 48 48]	vasp	[2.499]	-8e-05	3e-05	-2e-05	0	-0.00143	0	-2e-05	-0.0001	-2e-05	0.06633	0	0	0.02317	0.17473	0.03413	0	0	0	0.179534	mm2	Cd4-H36-C28-N28-O4	0.0324785	0.186229	['[Cd]']	['[N][N][N]']	100	2.07549	Polar	equal	Converged
LOQFEE_FSR	['12']	[30]	[2]	[2, 2, 2, 2]	[30 30 30 30]	vasp	[2.487]	9e-05	1e-05	1e-05	0	-0.07039	0	1e-05	-1e-05	0	-0.01601	0	0	-0.10198	-0.07041	-0.12981	0	0	0	0.179466	mm2	Zn4-H28-C32-N4-O24	0.303597	0.365423	['[OH2][Zn]']	['[O-]C(=O)Cn1cc(ccc1=O)C(=O)[O-]']	92	2.00475	Polar	equal	Converged
BIZSEJ_FSR	['12']	[30]	[2]	[2, 2]	[30 30]	vasp	[2.487]	7e-05	9e-05	-3e-05	0.08677	-1e-05	-0.04507	0.06727	0.09093	0.1268	0	0.0536	0	-0.00022	-0.00018	-0.00013	0.0676	-3e-05	0.04161	0.178171	2	Zn2-H24-C12-S6-N4-O16	0.0401115	0.167843	['[OH2][Zn]([OH2])([OH2])[OH2]']	['[O-]C(=O)CSc1nnc(s1)SCC(=O)[O-]']	64	2.0958	Polar	equal	Converged
NIPWIT01_FSR	['12']	[30]	[2]	[2, 2, 2, 2, 2, 2, 2, 2]	[30 30 30 30 30 30 30 30]	vasp	[2.253]	-1e-05	2e-05	-3e-05	0	-0.09197	0	0	-2e-05	0	0.17817	0	0	-0.05827	0.03718	0.13754	0	0	0	0.17817	mm2	Zn8-H20-C28-N4-O24	0.234008	0.360793	['[OH]', '[Zn]']	['[O-]C(=O)c1ccnc(c1)C(=O)[O-]']	84	2.40924	Polar	equal	Converged
KMTSUL01_FSR	['1']	[19]	[1]	[1, 1, 1, 1, 1, 1, 1, 1, 1, 1, 1, 1]	[19 19 19 19 19 19 19 19 19 19 19 19]	vasp	[1.267]	2e-05	0	0	-0.13156	0	0	0	0	0	0	-0.09312	0	-2e-05	0	1e-05	0	0	0.17748	0.17748	222	K12-H12-C4-S12-O40	0.02881	0.20247	['[K]', '[K][OH2][K]']	['[O]S(C(S([O])([O])[O])S([O])([O])[O])([O])[O]']	80	2.39068	Non-polar	equal	Converged
VUWTAL_FSR	['12']	[30]	[2]	[2, 2, 2, 2, 2, 2]	[30 30 30 30 30 30]	vasp	[1.905]	-0.00119	0.00144	0.0005	0.00251	0.00145	-0.03216	-0.03078	0.03103	-0.0004	-0.00272	0	0	0.02998	0.02998	-0.17216	0	0	0	0.177305	3m	C36-H30-N18-O18-Zn6	0.0906143	0.259576	['[Zn]']	['[O-]C(=O)CNC(=O)C1=CN=N[CH]1']	108	1.1156	Polar	equal	Converged
EMAQUG_FSR	['1', '2']	[3, 12]	[1, 2]	[1, 1, 1, 1, 2, 2]	[ 3 3 3 3 12 12]	vasp	[1.124, 1.978]	0	0	0	0.0043	0	-0.00266	-0.07972	-0.14968	0.03953	0	-0.03338	0	0	1e-05	0	-0.01778	0	-0.02493	0.177303	2	Li4-Mg2-H40-C22-N4-O22	0.145028	0.30441	['[OH2][Li][OH2][Li][OH2]']	['O=C1CN2CCCN3CC(=O)O[Mg](O1)(OC(=O)C2)OC(=O)C3']	94	1.5154	Polar	equal	Converged
ECOLOZ_FSR	['12']	[30]	[2]	[2, 2, 2, 2]	[30 30 30 30]	vasp	[2.075]	0	-1e-05	-1e-05	0	0.04652	0	0.0001	4e-05	1e-05	-0.05128	0	0	0.06744	-0.03795	-0.15915	0	0	0	0.176966	mm2	Zn4-H24-C20-N16-O8	0.0832883	0.248627	['[Zn]']	['[O-]C(=O)CCCC1=NN=N[N]1']	72	1.92222	Polar	equal	Converged
VEWKEQ_FSR	['7']	[25]	[2]	[2]	[25]	vasp	[2.599]	0.06401	0.02895	0.00433	0.02231	0.01275	0.01162	-0.02182	0.10325	0.1094	0.03877	0.07271	-0.0303	0.06524	-0.02366	-0.04049	0.04705	0.07834	-0.00108	0.176902	1	Mn1-H19-C23-N5-O5	0.207684	0.219719			53	1.61009	Polar	equal	Converged
COQYUD_FSR	['1']	[11]	[1]	[1, 1]	[11 11]	vasp	[1.123]	-0.0192	0.03367	-0.11678	0	0.02141	0	-2e-05	0	-1e-05	-0.03263	0	-0.00961	-0.1	0.02347	-0.09322	0	0.00457	0	0.176766	m	C28-H40-N4-Na2-O4-P2	0.0745776	0.188781			80	1.28603	Polar	equal	Converged
QUCTIS_FSR	['12']	[48]	[2]	[2]	[48]	vasp	[2.43]	-0.12651	-0.06023	-0.02476	0.00418	-0.04205	-0.04626	-0.06949	-0.03165	-0.01787	0.02102	0.00012	0.00546	-0.02728	-0.0451	0.02966	-0.01871	-0.01561	-0.00455	0.176315	1	Cd1-H48-C30-N6-O9	0.0743938	0.232478	['[OH2][Cd]']	['C(CCN1[CH]N=C[N]1)CCCn1cncn1']	94	1.49394	Polar	equal	Converged
ACOHAE_FSR	['12']	[48]	[2]	[2, 2]	[48 48]	vasp	[2.486]	0.13511	-0.04395	0.10128	0	-0.01889	0	0.00171	0.00053	-0.00171	-0.01024	0.00022	0.03234	0.04763	0.09476	0.00411	0	0.04376	0	0.176054	m	C40-Cd2-H36-N8-O10	0.113509	0.212002	['[OH2][Cd]']	['[O-]C(=O)c1ccccc1C(=O)[O-]']	96	1.71839	Polar	equal	Converged
ODONUR_FSR	['10']	[28]	[2]	[2, 2, 2, 2]	[28 28 28 28]	vasp	[1.565]	-0.00025	0.00015	-7e-05	0.03182	-2e-05	-0.09822	-0.06036	-0.15398	-0.05401	0	0.02685	0	4e-05	-3e-05	-7e-05	-0.16279	3e-05	-0.008	0.176043	2	Ni4-H8-C16-S4-N8-O20	0.189558	0.254197	['[OH2][Ni]']	['[O-]C(=O)c1nsnc1C(=O)[O-]']	60	2.48642	Polar	equal	Converged
NIYBOP_FSR	['12']	[48]	[2]	[2, 2]	[48 48]	vasp	[2.462]	0	-1e-05	-3e-05	-0.02295	3e-05	0.12574	0.14818	0.08722	0.03726	0	0.00551	0	2e-05	0	-3e-05	0.03364	1e-05	-0.04362	0.176021	2	Cd2-H10-C22-N2-O8	0.111619	0.246239	['[Cd]']	['[O-]C(=O)c1nc2ccccc2cc1C(=O)[O-]']	44	2.3191	Polar	equal	Converged
NOKCOH_FSR	['1']	[3]	[1]	[1, 1]	[3 3]	vasp	[1.263]	0.00014	0.00026	0.00019	0.0108	1e-05	-0.01039	-0.06757	0.12827	0.08822	0	-0.04588	0	0.00017	0.00048	0.00013	0.03304	5e-05	0.03595	0.175803	2	C20-H20-Li2-N2-O6	0.186272	0.301495	['[Li]']	['[O-]C(=O)C([NH]=Cc1ccccc1[O])C']	50	1.41971	Polar	equal	Converged
WOFWIX_FSR	['12']	[48]	[2]	[2, 2, 2]	[48 48 48]	vasp	[2.451]	0.04424	0.07763	0.02883	-0.00362	-0.02885	0.03202	0.00818	-0.14239	0.03165	-0.00185	0.00122	0.00901	-0.05397	-0.05562	-0.00593	0.00626	-0.01525	-0.01307	0.175599	1	Cd3-H24-C36-N12	0.0335665	0.19847	['[Cd]']	['[C]#N']	75	1.72945	Polar	equal	Converged
KHPHAL02_FSR	['1']	[19]	[1]	[1, 1, 1, 1]	[19 19 19 19]	vasp	[1.309]	-1e-05	2e-05	1e-05	0	-0.08839	0	0	-1e-05	0	0.01565	0	0	-0.12947	0.08715	0.08006	0	0	0	0.175406	mm2	K4-H20-C32-O16	0.0823739	0.205906	['[K]']	['OC(=O)c1ccccc1C(=O)[O-]']	72	1.66044	Polar	equal	Converged
JOHFIX_FSR	['12']	[80]	[2]	[2, 2]	[80 80]	vasp	[1.924]	0	2e-05	1e-05	-0.06913	1e-05	-0.06256	-0.10827	0.04943	0.12763	0	0.00956	0	0	0	-2e-05	-0.00164	-1e-05	0.04779	0.174776	2	Hg2-H18-C20-N6-O6	0.25754	0.255358			52	2.44392	Polar	equal	Converged
KOGCAM_FSR	['1']	[11]	[1]	[1, 1, 1, 1]	[11 11 11 11]	vasp	[1.265]	-3e-05	0	2e-05	0	0.02736	0	0.00012	2e-05	-1e-05	0.07119	0	0	0.08372	0.12175	-0.0929	0	0	0	0.174535	mm2	Na4-H12-C12-N16-O20	0.01625	0.167385			64	1.89402	Polar	equal	Converged
QIXWAX_FSR	['12']	[30]	[2]	[2, 2]	[30 30]	vasp	[1.976]	-2e-05	5e-05	0.00011	-0.07267	-4e-05	0.05606	0.04844	-0.0269	-0.15937	0	-0.0428	0	-3e-05	-5e-05	-0.00035	0.05646	8e-05	-0.00111	0.174071	2	Zn2-H10-C6-N8-Cl2-O6	0.127491	0.193607	['[OH2][Zn]Cl']	['[O-]C(=O)Cn1cnnn1']	34	2.09003	Polar	equal	Converged
MINLIG_FSR	['1']	[55]	[1]	[1, 1]	[55 55]	vasp	[1.533]	2e-05	0	0	0.05543	-1e-05	-0.04322	-0.00717	-0.03203	0.10679	0	-0.13318	0	4e-05	-3e-05	-2e-05	-0.00806	3e-05	-0.01944	0.173834	2	Cs2-H20-C30-N2-O10	0.0449185	0.199034			64	2.0038	Polar	equal	Converged
CISLIB_FSR	['1']	[11]	[1]	[1, 1, 1]	[11 11 11]	vasp	[1.092]	0.09198	-0.07574	0.03846	0	0.00101	0	0.00026	-0.00067	-0.00047	-0.02208	-0.00013	-0.11746	0.12921	0.02064	0.02571	0	0.05933	0	0.173789	m	C2-H6-N1-Na3-O10-S2	0.118164	0.205964	['[Na]', '[Na][OH2][Na]']	['[O]N(=O)=O', '[O]S(CCS([O])([O])[O])([O])[O]']	24	2.04384	Polar	equal	Converged
XEJVOZ_FSR	['2']	[38]	[2]	[2, 2, 2, 2, 2, 2, 2, 2, 2, 2, 2, 2]	[38 38 38 38 38 38 38 38 38 38 38 38]	vasp	[2.811]	-0.00108	0.00023	-0.00025	3e-05	0.02491	-0.01006	-0.00783	0.00932	0.00045	0.02433	0	0	0.0062	0.0062	-0.17349	0	0	0	0.173712	3m	C60-H24-N24-O48-Sr12	0.0410595	0.191675	['[Sr]']	['[O-]C(=O)c1[nH]cnc1C(=O)[O-]']	168	2.2469	Polar	equal	Converged
ICEMAF_FSR	['12']	[30]	[2]	[2, 2, 2, 2]	[30 30 30 30]	vasp	[2.431]	-0.05544	0.02051	-0.04509	0	-0.11448	0	-5e-05	-3e-05	4e-05	0.0096	-1e-05	-0.0508	-0.06103	0.03349	-0.06562	0	-0.0605	0	0.173142	m	C58-H44-N4-O16-Zn4	0.0875291	0.187051	['[Zn]']	['C(Cc1ccncc1)Cc1ccncc1', '[O-]C(=O)c1ccccc1C(=O)[O-]']	126	1.69452	Polar	equal	Converged
VUQJEX_FSR	['11']	[29]	[1]	[1, 1, 1, 1]	[29 29 29 29]	vasp	[0.728]	-0.01851	-0.05256	0.03951	0	0.00045	0	-0.00051	-0.00011	2e-05	0.09453	9e-05	-0.04155	0.15202	0.02262	-0.06546	0	-0.01832	0	0.173099	m	Br2-C12-Cu4-H8-N10	0.182159	0.313793	['[Cu]', '[Cu]Br']	['n1ccc(cc1)C1=NN=N[N]1', 'n1ccc(cc1)C1=N[N]N=N1']	36	2.84234	Polar	equal	Converged
BEHSEP_FSR	['14']	[50]	[4]	[4, 4, 4, 4]	[50 50 50 50]	vasp	[2.882]	-0.00109	-0.00384	-0.00155	0	-0.05219	0	-7e-05	-0.00015	-0.00019	-0.01272	0	0	-0.09615	-0.11864	-0.08062	0	0	0	0.172735	mm2	C36-H52-N4-O8-Sn4	0.0324779	0.172959			104	1.65875	Polar	equal	Converged
MUMNIR_FSR	['1']	[11]	[1]	[1, 1, 1, 1]	[11 11 11 11]	vasp	[1.246]	-0.04276	-0.15368	0.00601	0	0.00096	0	0.00021	2e-05	2e-05	-0.00961	4e-05	-0.086	-0.01541	-0.05519	-0.07843	0	0.03333	0	0.171701	m	Na4-H28-C28-N4-O10	0.0587469	0.184432	['[Na][OH2][Na]']	['[O-]C(=O)c1ccccc1N']	74	1.64068	Polar	equal	Converged
QORBAA_FSR	['11']	[29]	[1]	[1, 1]	[29 29]	vasp	[0.307]	0	1e-05	-2e-05	0	-0.14571	0	-1e-05	8e-05	5e-05	-0.17156	0	0	-0.01379	-0.10328	-0.12854	0	0	0	0.17156	mm2	C12-Cl2-Cu2-H8-N4-S2	0.18342	0.307701	['Cl[Cu]']	['c1ccc2c(c1)nsn2']	30	2.19553	Polar	equal	Converged
IPOYAN_FSR	['1']	[11]	[1]	[1, 1]	[11 11]	vasp	[1.279]	-2e-05	-4e-05	-2e-05	0.02529	-1e-05	0.021	0.05639	0.15694	0.01755	0	0.0356	0	-7e-05	-0.00015	-0.0003	0.08618	-8e-05	-0.02953	0.171422	2	Na2-H10-C14-O6	0.100816	0.187838	['[Na]']	['[O-]C(=O)c1ccc(cc1)O']	32	1.75025	Polar	equal	Converged
CIHXOJ_FSR	['15']	[83]	[3]	[3, 3]	[83 83]	vasp	[4.256]	-0.13641	0.00493	-0.0535	0	0.08546	0	0	3e-05	-7e-05	0.04262	0	0.05788	0.03668	0.02254	0.01118	0	0.02137	0	0.171165	m	Bi2-H16-C20-N2-O20	0.295892	0.291325	['[Bi]']	['[O-]C(=O)c1cc(cc(c1)C(=O)O)C(=O)[O-]']	60	2.24644	Polar	equal	Converged
INODUL_FSR	['12']	[48]	[2]	[2, 2, 2, 2]	[48 48 48 48]	vasp	[2.454]	2e-05	-0.00015	-8e-05	0	0.04387	0	1e-05	-1e-05	3e-05	0.04839	0	0	0.06997	0.09752	0.12048	0	0	0	0.170063	mm2	Cd4-H36-C40-N12-O24	0.0200626	0.183351	['[OH2][Cd][OH2]']	['OC(=O)C1=C(N=C([N]1)c1cccnc1)C(=O)[O-]']	116	2.19278	Polar	equal	Converged
INEFIR_FSR	['12']	[48]	[2]	[2]	[48]	vasp	[2.376]	-1e-05	0	1e-05	-0.03014	0	0.07434	0.04809	0.14861	0.05966	0	-0.02997	0	-1e-05	0	1e-05	0.04636	-1e-05	0.02609	0.169868	2	C30-Cd1-H38-N4-O6	0.15119	0.186259	['[Cd]']	['O=C(C1CCC(C1(C)C)(C)C(=O)[O-])Nc1ccncc1']	79	1.36167	Polar	equal	Converged
DEMVAT01_FSR	['12']	[30]	[2]	[2, 2, 2, 2]	[30 30 30 30]	vasp	[1.988]	0	0	0	0	-0.03612	0	0	2e-05	0	0.04271	0	0	-0.08229	0.09965	0.11014	0	0	0	0.169802	mm2	Zn4-H40-C48-N16-Cl8	0.0609356	0.15192	['Cl[Zn]Cl']	['c1ccc(cn1)[CH][N][N][CH]c1cccnc1']	116	1.65492	Polar	equal	Converged
KICQUL_FSR	['10']	[28]	[2]	[2, 2]	[28 28]	vasp	[1.817]	-2e-05	4e-05	-0.0001	0.00651	2e-05	-0.10106	-0.12966	-0.09978	-0.0433	0	0.01278	0	-6e-05	-2e-05	-2e-05	-0.06873	-2e-05	0.02702	0.169723	2	Ni2-H28-C20-N4-O10	0.0452626	0.188273	['[OH2][Ni]']	['CC(C(=O)[O-])NCc1ccncc1', '[O-]C=O']	64	1.57238	Polar	equal	Converged
MITREN_FSR	['12']	[48]	[2]	[2]	[48]	vasp	[2.286]	0.00012	5e-05	0.00018	0.03651	4e-05	0.02073	-0.01894	0.14636	0.0209	0	0.07978	0	-0.0001	-2e-05	-0.0001	-0.0084	3e-05	-0.03061	0.169061	2	C18-Cd1-H32-N6-O8	0.0622775	0.151586			65	1.57337	Polar	equal	Converged
MISLAE_FSR	['1']	[3]	[1]	[1, 1, 1, 1]	[3 3 3 3]	vasp	[1.124]	0	0	0	0	-0.07722	0	0	0	0	0.05309	0	0	0.05031	0.08462	-0.13698	0	0	0	0.168687	mm2	Li4-H36-C20-Br4-N4-O8	0.0934926	0.239877	['[Li]']	['[O-]C(=O)C1CCC[NH2]1']	76	1.79791	Polar	equal	Converged
QEVNEN_FSR	['1', '1', '15']	[19, 3, 51]	[1, 1,3]	[1, 1, 1, 1,3,3,3,3]	[19 19 3 3 51 51 51 51]	vasp	[1.171, 1.392, 3.093]	-0.00012	-0.00033	-0.00022	0.16855	0	0	0	0	0	0	0.04447	0	0	0	3e-05	0	0	0.01858	0.168551	222	K2-Li2-Sb4-H8-C16-O24	0.10654	0.170521			56	2.73201	Non-polar	equal	Converged
PEGXUU_FSR	['15']	[83]	[3]	[3, 3]	[83 83]	vasp	[3.586]	-0.0001	-3e-05	-2e-05	-0.00749	-3e-05	-0.0005	0.05733	-0.13862	0.07658	0	-0.00519	0	0	-2e-05	1e-05	-0.06111	-8e-05	-0.0012	0.168504	2	Bi2-H18-C10-S2-N2-Cl2-O4	0.15645	0.136158			40	2.80169	Polar	equal	Converged
RITMAL_FSR	['11']	[29]	[1]	[1, 1]	[29 29]	vasp	[0.617]	-0.1047	0.1084	-0.06001	0	-0.01666	0	5e-05	-1e-05	4e-05	-0.02734	-1e-05	0.0381	-0.0221	0.00811	0.02006	0	-0.13044	0	0.168146	m	C6-Cl2-Cu2-H12-S4	0.163416	0.24	['Cl[Cu]']	['C1SCCS1']	26	2.24426	Polar	equal	Converged
UZEBAE_FSR	['11']	[29]	[1]	[1, 1, 1, 1, 1, 1]	[29 29 29 29 29 29]	vasp	[0.749]	0.00018	6e-05	5e-05	0	-0.02591	0	-0.00023	-0.00029	-0.00012	-0.0115	0	0	0.11035	0.09849	0.07935	0	0	0	0.167851	mm2	Cu6-H20-C24-S4-I2-O4	0.0380009	0.168395			60	2.76597	Polar	equal	Converged
NADCUS_FSR	['12']	[30]	[2]	[2, 2, 2, 2]	[30 30 30 30]	vasp	[2.188]	-0.07655	0.00178	-0.04502	0	0.05577	0	3e-05	-4e-05	7e-05	-0.01205	-1e-05	-0.0317	0.02882	0.0143	0.12606	0	-0.06068	0	0.167415	m	C42-H40-N4-O18-S2-Zn4	0.188695	0.231127	['[OH2][Zn][OH][Zn]']	['C(Cc1ccncc1)Cc1ccncc1', '[O-]C(=O)c1cc(cc(c1)S([O])([O])[O])C(=O)[O-]']	110	1.82546	Polar	equal	Converged
BEHBIZ_FSR	['11']	[29]	[2]	[2, 2, 2, 2]	[29 29 29 29]	vasp	[1.418]	0.00017	0.00027	0.0002	0	0.13346	0	-0.00014	-0.00013	-0.00012	0.15875	0	0	0.00918	-0.07585	-0.14888	0	0	0	0.167342	mm2	Cu4-H12-C24-N8-Cl4-O16	0.126193	0.177	['Cl[Cu]']	['OC(=O)c1nccnc1C(=O)[O-]']	68	2.2112	Polar	equal	Converged
NARSUW_FSR	['10']	[28]	[2]	[2, 2]	[28 28]	vasp	[1.412]	0.06607	0.0092	0.06181	0	0.05841	0	0	1e-05	5e-05	-0.05633	0	-0.01847	0.02554	-0.01749	0.10588	0	0.07615	0	0.16653	m	C60-H44-N12-Ni2-O8	0.0719697	0.156837	['[Ni]']	['n1ccc(cc1)c1ccncc1']	126	1.45258	Polar	equal	Converged
CUTVET_FSR	['12']	[48]	[2]	[2, 2, 2, 2, 2, 2]	[48 48 48 48 48 48]	vasp	[2.427]	-4e-05	-4e-05	-5e-05	-0.00023	-0.00835	-0.02988	-0.02953	0.03029	0.00042	-0.00788	0	0	0.08871	0.08871	0.10941	0	0	0	0.166463	3m	C48-Cd6-H36-N24-O24	0.064163	0.199351	['[Cd]']	['OC(=O)C1=NC=N[C]1C(=O)[O-]', '[O-]C(=O)C1=C(N=C[N]1)C(=O)O', '[O-]C(=O)C1=NC=N[C]1C(=O)O']	138	1.99803	Polar	equal	Converged
IGUBIX_FSR	['11']	[29]	[1]	[1, 1]	[29 29]	vasp	[0.766]	0.02679	0.03268	0.01488	0	0.08645	0	-1e-05	-2e-05	-1e-05	0.05643	-1e-05	0.03299	0.05086	0.0261	0.13798	0	0.04177	0	0.165823	m	Cu2-H16-C26-Br6-N4-O2	0.181645	0.196969			56	2.48054	Polar	equal	Converged
TUBMIO_FSR	['12']	[48]	[2]	[2, 2]	[48 48]	vasp	[2.16]	0.09284	-0.00935	0.00035	0	-0.03078	0	-3e-05	1e-05	2e-05	-0.02005	4e-05	0.10428	-0.00323	0.04439	0.15908	0	0.00495	0	0.165376	m	Cd2-H20-C24-I4-N8-O2	0.108962	0.172056			60	2.63179	Polar	equal	Converged
MIFVII_FSR	['9']	[27]	[2]	[2]	[27]	vasp	[1.948]	-1e-05	1e-05	1e-05	-0.03867	1e-05	0.02149	0.09155	-0.06952	-0.00066	0	-0.08434	0	-2e-05	-1e-05	1e-05	-0.15823	-2e-05	-0.03289	0.165152	2	C24-Co1-H28-N2-O6	0.0619116	0.176977			61	1.45313	Polar	equal	Converged
HOYQAP_FSR	['12']	[30]	[2]	[2, 2, 2, 2]	[30 30 30 30]	vasp	[2.085]	3e-05	1e-05	0	0	-0.00149	0	2e-05	1e-05	0	-0.00289	0	0	0.02946	0.02188	-0.16101	0	0	0	0.165139	mm2	Zn4-H20-C18-N8-O6	0.210517	0.370837	['[Zn]']	['CC1=NC=C[N]1', 'CC1=N[CH]C=N1', '[O-]C(=O)[O-]']	56	1.92386	Polar	equal	Converged
AXAWED_FSR	['12']	[48]	[2]	[2]	[48]	vasp	[1.998]	0.00132	0.00042	0.00011	-0.04641	0.00018	0.01209	0.0028	0.1522	0.02948	0	-0.05596	0	-0.00082	4e-05	0.00062	0.07306	-0.00015	-0.01638	0.164844	2	C34-Cd1-Cl2-H30-N6-O4	0.0836902	0.214728	['Cl[Cd]Cl']	['O=C1Nc2cc(cc(c2)c2ccncc2)C(=O)N2CCCC2C(=O)Nc2cc(C(=O)N3C1CCC3)cc(c2)c1ccncc1']	77	1.41626	Polar	equal	Converged
SARBOE_FSR	['12']	[30]	[2]	[2, 2, 2, 2]	[30 30 30 30]	vasp	[2.051]	-2e-05	-7e-05	-3e-05	-0.16443	0	0	6e-05	8e-05	4e-05	0	-0.05101	0	-5e-05	-7e-05	-3e-05	0	0	-0.01765	0.16443	222	Zn4-H40-C48-N16-O16	0.01057	0.15397	['[Zn]']	['Nc1nccc(c1)C(=O)[O-]']	124	1.19947	Non-polar	equal	Converged
KEKREA_FSR	['2']	[20]	[2]	[2, 2]	[20 20]	vasp	[2.722]	0	1e-05	-1e-05	0.02266	-2e-05	0.04982	0.14681	0.06759	0.029	0	0.00785	0	0	0	-1e-05	0.04933	0	-0.02616	0.16439	2	Ca2-H24-C28-N4-O16	0.0720912	0.156865	['[OH2][Ca][OH2]']	['[O-]C(=O)c1cc([N][N]c2ccc(c(c2)C(=O)[O-])O)ccc1O']	74	1.70377	Polar	equal	Converged
REDWII_FSR	['11']	[29]	[2]	[2, 2]	[29 29]	vasp	[1.617]	-1e-05	-2e-05	0	0.02209	0	0.06134	0.14005	-0.0672	0.03451	0	0.03795	0	-1e-05	-1e-05	-1e-05	-0.02172	0	0.07463	0.163588	2	Cu2-H24-C16-S2-N4-O10	0.176175	0.180853	['[Cu]']	['[O-]C(=O)C1SCC(N1)C(=O)[O-]']	58	1.87254	Polar	equal	Converged
SNMAZH_FSR	['14']	[50]	[2]	[2, 2, 2, 2]	[50 50 50 50]	vasp	[2.881]	2e-05	-2e-05	1e-05	0	-0.03934	0	0.00011	3e-05	1e-05	-0.01488	0	0	-0.03643	0.07101	0.1425	0	0	0	0.163327	mm2	Sn4-H16-C16-O20	0.150056	0.300752	['[OH2][Sn]']	['[O-]C(=O)C=CC(=O)[O-]']	56	2.55273	Polar	equal	Converged
IYUCIP_FSR	['1', '12']	[19, 30]	[1, 2]	[1, 1, 2, 2]	[19 19 30 30]	vasp	[1.205, 1.959]	-1e-05	1e-05	2e-05	-0.01363	0	0.15829	0.0563	-0.03153	0.01584	0	-0.05368	0	4e-05	-1e-05	-1e-05	-0.01121	1e-05	-0.03755	0.163035	2	C11-Cl4-H16-K2-N2-O8-Zn2	0.0724902	0.204609	['[K]']	['O=C1C[NH]2CCC[NH](CC(=O)O[Zn](O1)(Cl)Cl)CC(=O)O[Zn](OC(=O)C2)(Cl)Cl']	45	2.04533	Polar	equal	Converged
KNATAR23_FSR	['1', '1']	[19, 11]	[1, 1]	[1, 1, 1, 1, 1, 1, 1, 1]	[19 19 19 19 11 11 11 11]	vasp	[1.191, 1.113]	-2e-05	1e-05	1e-05	0.16257	0	0	0	2e-05	1e-05	0	0.11283	0	-0.00012	0	-0.0001	0	0	0.10906	0.16257	222	K4-Na4-H48-C16-O40	0.00813	0.16159	['O', '[K]', '[Na]']	['OC(C(C(=O)[O-])O)C(=O)[O-]']	112	1.82107	Non-polar	equal	Converged
INEPIC_FSR	['12']	[30]	[2]	[2, 2, 2, 2]	[30 30 30 30]	vasp	[2.405]	0.00017	3e-05	-0.00042	0.12031	0.00029	0.06668	0.01605	-0.04196	-0.05439	0	0.0393	0	6e-05	-4e-05	-0.00047	0.02876	0.00036	0.10456	0.16239	2	Zn4-H34-C30-N14-O18	0.0991964	0.172344	['[OH2][Zn]', '[Zn]']	['NC1=NN=N[N]1', '[O-]C(=O)c1cc(C(=O)[O-])c(cc1C(=O)[O-])C(=O)[O-]']	100	2.05742	Polar	equal	Converged
RATDAS01_FSR	['12']	[30]	[2]	[2, 2, 2, 2, 2, 2, 2, 2, 2, 2, 2, 2]	[30 30 30 30 30 30 30 30 30 30 30 30]	vasp	[2.399]	0.00016	9e-05	9e-05	0.06171	0.0001	0.01227	0.07125	-0.06006	0.13265	0	0.00787	0	0.00037	0.00021	0.00017	0.08089	0.00016	0.01584	0.162302	2	Zn12-H24-C24-O48	0.145481	0.291885	['[Zn]']	['[O-]C=O']	108	2.38026	Polar	equal	Converged
QANLIA_FSR	['11']	[29]	[2]	[2]	[29]	vasp	[1.839]	0.01496	0.01482	0.01467	-0.01036	-0.00064	0.07298	0.00751	-0.13599	-0.08325	-0.00173	0.01198	0.00039	-0.01022	-0.00896	-0.0097	-0.04026	-0.00014	0.00521	0.162041	2	C12-Cu1-H14-N4-O5	0.148054	0.0706497	['[OH2][Cu]']	['[O-]C(=O)C(=O)[O-]']	36	1.7764	Polar	equal	Converged
MIKJUM_FSR	['12']	[48]	[2]	[2, 2]	[48 48]	vasp	[2.497]	0.00025	0.00026	2e-05	0	-0.03148	0	0.00388	0.00333	-4e-05	0.04129	0	0	-0.13416	-0.06158	-0.06597	0	0	0	0.161755	mm2	C28-Cd2-H16-N12-O4-S4	0.0829091	0.116288	['[Cd]']	['S=[C]1=NN=C(O1)c1ccccn1']	66	2.01611	Polar	equal	Converged
PODREH_FSR	['12']	[30]	[2]	[2, 2]	[30 30]	vasp	[2.091]	0.00045	0.00013	0.00024	-0.02265	-0.0004	0.05891	0.12351	0.07886	0.06782	0	0.00469	0	0.00034	0.00021	0.00036	-0.05282	-0.0004	0.02033	0.161542	2	C20-H16-N20-S8-Zn2	0.0595651	0.153756	['[Zn]']	['S=C1[N]N=C(S1)CN1[CH]N=C[N]1']	66	1.8431	Polar	equal	Converged
UNAJIC_FSR	['12']	[30]	[2]	[2, 2]	[30 30]	vasp	[2.063]	-0.01466	-0.08419	0.02407	0.03069	-0.0079	-0.00136	-0.0084	-0.11774	-0.01584	0.03716	0.01091	-0.01531	0.00984	0.03841	0.0057	-0.03611	0.01553	0.00212	0.161506	1	Zn2-H32-C36-N4-Cl4-O4	0.119841	0.236886	['Cl[Zn]Cl']	['O=c1ccccn1Cc1cccc(c1)Cn1ccccc1=O']	82	1.61781	Polar	equal	Converged
ZOMNUM_FSR	['6', '12']	[24, 30]	[6, 2]	[6, 2]	[24 30]	vasp	[2.646, 2.566]	6e-05	3e-05	0	-0.00598	-2e-05	-0.09002	-0.12072	-0.10464	0.00907	0	-0.01071	0	0	-1e-05	2e-05	-0.0546	0	-0.02266	0.160374	2	C14-Cr1-H18-N4-O4-Zn1	0.0636805	0.135491			42	1.18417	Polar	equal	Converged
FIRZAJ_FSR	['7']	[25]	[2]	[2, 2, 2, 2]	[25 25 25 25]	vasp	[2.409]	0.00017	3e-05	-0.00023	-0.01596	0.0001	0.10075	0.03776	0.14693	0.00324	0	0.02728	0	0.0001	0	-0.00014	0.04069	5e-05	0.12256	0.160164	2	Mn4-H20-C16-O26	0.0544219	0.20392			66	1.95055	Polar	equal	Converged
ADODII_FSR	['fblock']	[57]	[3]	[3, 3]	[57 57]	vasp	[4.276]	-0.00013	-0.00021	-4e-05	-0.0149	-0.00032	-0.00648	-0.13404	-0.07305	-0.02912	0	-0.03296	0	-8e-05	-6e-05	-2e-05	0.00073	2e-05	-0.04766	0.158863	2	C52-H40-La2-O19	0.135481	0.149742	['[La]']	['[O-]C(=O)c1ccc(cc1)OCC(COc1ccc(cc1)C(=O)[O-])(COc1ccc(cc1)C(=O)[O-])COCC(COc1ccc(cc1)C(=O)[O-])(COc1ccc(cc1)C(=O)[O-])COc1ccc(cc1)C(=O)[O-]']	113	1.20549	Polar	equal	Converged
OJEPIE_FSR	['12']	[80]	[2]	[2, 2, 2, 2]	[80 80 80 80]	vasp	[1.835]	-2e-05	0	3e-05	0	-0.03883	0	-1e-05	0	-2e-05	-0.02817	0	0	0.0105	0.12477	-0.09754	0	0	0	0.158719	mm2	Hg4-H44-C24-S4-I4	0.0359768	0.192514	['I[Hg]I', '[Hg]']	['[S]C1CCCCC1']	80	3.23546	Polar	equal	Converged
VEVRIZ_FSR	['12']	[48]	[2]	[2, 2]	[48 48]	vasp	[2.784]	0.04114	0.04238	0.06599	0	0.04482	0	0	1e-05	0	0.02912	0	0.06344	0.082	-0.02199	0.05935	0	0.08688	0	0.158584	m	Cd2-H14-C18-S4-N6-O2	0.099218	0.245226	['[Cd]']	['CC(=O)c1cccnc1', '[S]C#N']	46	2.04572	Polar	equal	Converged
EKIHAI_FSR	['7']	[25]	[2]	[2, 2]	[25 25]	vasp	[2.414]	0	0	0	-0.00594	0	0.10326	0.13394	-0.06363	0.03664	0	-0.04102	0	0	0	0	-0.0768	0	0.00037	0.158158	2	Mn2-H18-C10-S2-N2-O10	0.159655	0.247392	['[OH2][Mn]']	['[O-]C(=O)CSCC(C(=O)[O-])N']	44	2.01782	Polar	equal	Converged
SIRPUF_FSR	['1']	[19]	[1]	[1, 1, 1, 1]	[19 19 19 19]	vasp	[1.371]	-0.03628	-0.00962	-0.00709	0	-0.05797	0	-5e-05	1e-05	0	-0.01519	2e-05	-0.00083	-0.04955	-0.04874	-0.13979	0	-0.0043	0	0.158114	m	Br4-C36-H24-K4-O8	0.0922079	0.212059	['[K]']	['[O-]C(=O)C=Cc1cccc(c1)Br']	76	1.87272	Polar	equal	Converged
DAXDUE_FSR	['2']	[20]	[2]	[2, 2, 2, 2]	[20 20 20 20]	vasp	[2.663]	-0.01155	-0.06808	0.13193	0	0.0508	0	-1e-05	-2e-05	0	0.05452	-1e-05	-0.14581	0.01582	0.0009	0.00695	0	0.03154	0	0.158029	m	Ca4-H36-C44-N12-O20	0.071175	0.160597	['[Ca]', '[OH2][Ca]']	['[O-]C(=O)c1[nH]c(nc1C(=O)[O-])Cc1ccncc1']	116	1.61278	Polar	equal	Converged
TISLOX_FSR	['11']	[29]	[1]	[1, 1, 1, 1]	[29 29 29 29]	vasp	[0.619]	-2e-05	-1e-05	4e-05	0	-0.03791	0	0	-2e-05	-3e-05	-0.03174	0	0	-0.14746	-0.05285	0.01938	0	0	0	0.157839	mm2	C12-Cu4-H8-N4-S4	0.274938	0.313684	['[Cu]']	['[S]C#N', '[S]c1ccncc1']	32	2.51594	Polar	equal	Converged
SOKDIH_FSR	['11']	[29]	[2]	[2, 2]	[29 29]	vasp	[1.528]	2e-05	5e-05	3e-05	0.00885	-1e-05	-0.03399	0.04719	0.11966	0.07911	0	0.04334	0	-1e-05	-0.0002	-0.00022	0.07243	-5e-05	0.09942	0.157106	2	Cu2-H22-C16-S2-N6-O12	0.0831596	0.205254	['[Cu]', '[OH]']	['[O]S(c1ccc(cc1)n1cnnc1)([O])[O]']	60	1.95791	Polar	equal	Converged
LOHKOK_FSR	['1']	[11]	[1]	[1, 1, 1, 1]	[11 11 11 11]	vasp	[1.313]	4e-05	1e-05	-1e-05	0	-0.15688	0	-0.00056	-3e-05	-0.00033	0.08206	0	0	-0.01485	0.09418	0.0236	0	0	0	0.15688	mm2	Na4-H24-C32-N12-O8	0.194527	0.24805	['[Na]']	['O=C1N[N]C(=O)c2c1c(N)ccc2']	80	1.70045	Polar	equal	Converged
RAJRUP_FSR	['12']	[30]	[2]	[2, 2, 2, 2]	[30 30 30 30]	vasp	[2.163]	-0.05128	-0.02724	-0.09552	0	0.06115	0	0.00011	-2e-05	1e-05	-0.02078	-1e-05	0.02898	0.08336	0.01	0.07185	0	0.02587	0	0.156615	m	C56-H44-N4-O16-Zn4	0.0968246	0.187761	['[Zn]']	['[O-]C(=O)c1ccccc1C(=O)[O-]']	124	1.62301	Polar	equal	Converged
SAWVER_FSR	['11']	[29]	[1]	[1, 1]	[29 29]	vasp	[0.672]	-1e-05	0	-1e-05	-0.02052	0	0.00124	-0.08326	-0.11183	-0.07086	0	-0.00816	0	-1e-05	-1e-05	-3e-05	-0.02999	0	-0.01572	0.156607	2	Cu2-H14-C14-Br2-N2	0.144341	0.247109			34	2.19228	Polar	equal	Converged
SAWWIW_FSR	['11']	[29]	[1]	[1, 1]	[29 29]	vasp	[0.672]	1e-05	0	0	0	0.00846	0	0	-0.0001	5e-05	0.09873	0	0	-0.00982	-0.09369	0.12492	0	0	0	0.156459	mm2	Cu2-H18-C14-N2-Cl2	0.135478	0.177642			38	1.78174	Polar	equal	Converged
UWIGOX_FSR	['2']	[56]	[2]	[2, 2]	[56 56]	vasp	[3.035]	-0.00787	-0.10807	-0.05998	0	-0.03037	0	0	0	0	-0.07179	0	-0.0117	0.03123	-0.09269	-0.02233	0	0.01114	0	0.15626	m	Ba2-H32-C28-N8-O18	0.0454883	0.129524	['[OH2][Ba]']	['CCc1[nH]c(c(n1)C(=O)O)C(=O)[O-]', 'CCc1[nH]c(c(n1)C(=O)[O-])C(=O)O']	88	2.01828	Polar	equal	Converged
NADWOG_FSR	['12']	[30]	[2]	[2, 2]	[30 30]	vasp	[2.196]	-3e-05	-2e-05	-2e-05	0.02662	0	0.02587	-0.04787	0.14759	-0.00364	0	0.01672	0	-3e-05	-2e-05	-2e-05	0.02071	0	0.018	0.1561	2	Zn2-P2-H26-C22-N4-O10	0.191383	0.341131	['[Zn]']	['[O]P(=O)[O]']	66	1.80486	Polar	equal	Converged
UNIROZ_FSR	['1']	[3]	[1]	[1, 1]	[3 3]	vasp	[1.147]	0	0	0	-0.00179	0	-0.08958	-0.06726	-0.01839	-0.07608	0	0.02155	0	0	0	0	-0.0477	0	0.12194	0.156025	2	Li2-H10-C8-O12	0.137584	0.196501	['[Li]']	['[O-]C(=O)C(C(C(=O)O)O)O']	32	1.71225	Polar	equal	Converged
DUWTOG_FSR	['12']	[30]	[2]	[2, 2, 2, 2, 2, 2, 2, 2]	[30 30 30 30 30 30 30 30]	vasp	[2.042]	-1e-05	2e-05	0	0	0.15457	0	2e-05	-2e-05	1e-05	-0.00049	0	0	0.13148	0.07058	0.0453	0	0	0	0.155951	mm2	Zn8-H32-C20-N32-O8	0.04318	0.140311	['[OH]', '[Zn]']	['C(CC1=NN=N[N]1)CC1=NN=N[N]1']	100	2.35971	Polar	equal	Converged
HEBNAF_FSR	['12']	[30]	[2]	[2, 2]	[30 30]	vasp	[2.361]	0.09493	-0.03698	0.02188	0	0.03629	0	2e-05	-0.00012	8e-05	-0.03357	7e-05	0.02878	0.10693	-0.0123	-0.08178	0	-0.03722	0	0.155781	m	C36-H24-N12-O8-Zn2	0.116758	0.167114	['[Zn]']	['[O-]C(=O)c1ccc(cc1)n1ncnc1']	82	1.59919	Polar	equal	Converged
VIDZEP_FSR	['12']	[48]	[2]	[2, 2]	[48 48]	vasp	[2.539]	0.03762	-0.04664	0.03793	0	0.01985	0	0.00013	0.00042	-0.00011	0.04073	-1e-05	0.01033	0.00187	0.09091	-0.10871	0	-0.01252	0	0.155373	m	C34-Cd2-H34-N10-O8	0.0743424	0.202074	['[Cd]']	['C(Cn1cncc1)CCn1cncc1', '[O-]C(=O)c1cnccc1C(=O)[O-]']	88	1.79198	Polar	equal	Converged
BOVPUZ_FSR	['1']	[3]	[1]	[1, 1]	[3 3]	vasp	[1.231]	9e-05	2e-05	-0.00019	0.02073	-4e-05	0.03268	0.01556	-0.15232	0.02252	0	0.01312	0	-0.0001	-2e-05	-0.00037	0.05984	-0.00018	0.02127	0.155315	2	Li2-H10-C14-N4-O14	0.128347	0.159932	['[Li][OH2]']	['O=N(=O)c1cc(ccc1C(=O)[O-])N(=O)=O']	44	1.6543	Polar	equal	Converged
SAWVIV_FSR	['11']	[29]	[1]	[1, 1]	[29 29]	vasp	[0.669]	0.00021	0.00045	0.0003	0.00133	-3e-05	-0.06688	-0.04913	-0.14288	0.03491	0	-0.00757	0	-5e-05	-0.00016	-0.00028	-0.05127	-2e-05	0.0025	0.155257	2	Cu2-H18-C26-N2-Cl2	0.152559	0.286891			50	1.81846	Polar	equal	Converged
VEWJUF_FSR	['9']	[27]	[2]	[2]	[27]	vasp	[2.255]	-0.01553	0.01461	-0.02882	-0.00026	-0.02537	0.012	-0.06202	0.07317	-0.01803	-0.00425	-0.0152	-0.0136	0.02862	-0.09401	-0.04825	0.02387	0.07162	-0.01031	0.15523	1	Co1-H19-C23-N3-O8	0.206844	0.200395			54	1.69859	Polar	equal	Converged
WETFEJ_FSR	['12']	[48]	[2]	[2, 2, 2, 2]	[48 48 48 48]	vasp	[2.574]	-1e-05	1e-05	0	0	0.09664	0	0	-1e-05	0	-0.00593	0	0	0.04299	-0.00904	0.14873	0	0	0	0.155082	mm2	C44-Cd4-H28-N16-O8	0.09815	0.13798	['[Cd]']	['[O-]C(=O)c1nccnc1C(=O)[O-]', 'c1ccc(nc1)C1=CC=N[N]1', 'c1ccc(nc1)C1=NN=C[CH]1']	100	1.98182	Polar	equal	Converged
XEQMUB01_FSR	['2']	[38]	[2]	[2, 2]	[38 38]	vasp	[2.742]	-0.0004	-0.00012	-0.00069	0.06579	0.00063	0.01435	0.12164	0.02351	-0.01818	0	0.09139	0	-0.00017	-0.00011	0.00016	0.04295	-0.00012	0.05417	0.155022	2	C28-H32-N4-O12-Sr2	0.0509614	0.162547	['O', '[Sr]']	['[O-]C(=O)c1ccccc1N']	78	1.66127	Polar	equal	Converged
IYUCOV_FSR	['12']	[30]	[2]	[2, 2]	[30 30]	vasp	[2.091]	-1e-05	0	0	0	0.13514	0	0	0	1e-05	-0.01682	0	0	-0.14361	0.01673	-0.05469	0	0	0	0.154579	mm2	Zn2-H40-C22-I4-N4-O18	0.0610073	0.14873	['[OH2][Zn](I)I']	['[O-]C(=O)C[NH](CC(=O)O)CCC[NH](CC(=O)O)CC(=O)[O-]']	90	2.32226	Polar	equal	Converged
LUVBAH_FSR	['12']	[30]	[2]	[2, 2, 2, 2]	[30 30 30 30]	vasp	[2.209]	-0.00015	-4e-05	-0.00025	0	-0.01792	0	-3e-05	1e-05	0	-0.02219	0	0	-0.10309	0.00871	-0.11475	0	0	0	0.154503	mm2	C24-H16-N8-O20-Zn4	0.0306276	0.153084	['[Zn]']	['OCC1=NC(=C([N]1)C(=O)O)C(=O)[O-]']	72	1.94766	Polar	equal	Converged
BECHEY_FSR	['8']	[26]	[2]	[2, 2]	[26 26]	vasp	[-0.93]	-0.00192	-0.01749	-0.10879	-0.00219	0.00525	0.02279	0.03938	0.02736	-0.00231	-0.00563	0.00997	0.06759	-0.00304	-0.02367	-0.08903	-0.01507	0.05134	0.02654	0.153914	1	Fe2-H20-C29-N18-O1	0.098893	0.120237	['[Fe]']	['[C]#N']	70	1.71701	Polar	equal	Converged
LESZEP_FSR	['11']	[29]	[1]	[1, 1, 1, 1]	[29 29 29 29]	vasp	[0.399]	-0.09565	-0.05535	-0.07925	0	-0.06667	0	0	3e-05	1e-05	0.00182	1e-05	0.00232	0.01037	0.02055	0.01483	0	0.01205	0	0.153879	m	Cu4-H18-C28-S2-N10	0.107531	0.139887	['[Cu][Cu]']	['[S]C#N', 'n1ccc(cc1)C1=NN=C([CH]1)c1ccncc1', 'n1ccc(cc1)C1=N[N]C(=C1)c1ccncc1']	62	1.99614	Polar	equal	Converged
LEZNOV_FSR	['fblock']	[70]	[3]	[3, 3, 3]	[70 70 70]	vasp	[3.986]	-0.09078	0.09055	0.00013	-0.08371	0	0	-0.00106	0.00107	0.00021	-0.00013	0.08366	0.09059	0.0002	0.0002	0.00032	0	0	0	0.153143	32	C18-H15-N6-O21-Yb3	0.0317115	0.13389	['[OH2][Yb][OH2]']	['[O-]C(=O)C1=CC(=N[C](=N1)=O)C(=O)[O-]']	63	2.30483	Non-polar	equal	Converged
SIVGIP_FSR	['12']	[30]	[2]	[2, 2]	[30 30]	vasp	[1.949]	0.06956	-0.00516	-0.0381	0	0.01592	0	-2e-05	-1e-05	0	0.00358	-1e-05	-0.01993	-0.12433	0.04151	-0.03862	0	-0.02996	0	0.152564	m	C8-H12-N16-Zn2	0.0523122	0.181962	['[Zn]']	['CC1=NN=N[N]1']	38	1.12698	Polar	equal	Converged
FODBUX_FSR	['12']	[48]	[2]	[2, 2, 2]	[48 48 48]	vasp	[2.464]	0	0	-1e-05	-0.00872	0	-0.01621	-0.08709	-0.12391	-0.00881	0	0.01553	0	-1e-05	-2e-05	0	-0.01027	0	0.00049	0.152503	2	C52-Cd3-H46-N8-O14	0.0596503	0.180469	['[Cd]']	['CC(C(=O)[O-])OCc1cc(cc(c1)C(=O)[O-])C(=O)[O-]', 'c1cc(cc(c1)Cn1cncc1)Cn1cncc1']	123	1.77238	Polar	equal	Converged
HULFOL_FSR	['12']	[48]	[2]	[2, 2, 2, 2]	[48 48 48 48]	vasp	[2.308]	1e-05	0	0	0	0.0096	0	0.00029	1e-05	4e-05	-0.03099	0	0	0.02837	0.05473	0.1389	0	0	0	0.151965	mm2	Cd4-H32-C56-I12-N20-O16	0.026427	0.132164	['[Cd]']	['[O-]C(=O)c1c(I)c(C(=O)[O-])c(c(c1I)N)I']	140	2.70967	Polar	equal	Converged
WOCGAY_FSR	['1']	[55]	[1]	[1, 1, 1, 1]	[55 55 55 55]	vasp	[1.384]	2e-05	4e-05	-5e-05	0	0.03749	0	0	2e-05	1e-05	-0.04599	0	0	0.04585	-0.07369	-0.12419	0	0	0	0.151511	mm2	Cs4-H28-C32-O12	0.0727795	0.20433	['[Cs]']	['[O-]C(=O)COc1ccccc1']	76	2.02636	Polar	equal	Converged
HEVXAI_FSR	['12']	[48]	[2]	[2, 2]	[48 48]	vasp	[2.473]	2e-05	0	-1e-05	-0.00757	0	0.07174	0.0387	0.14589	0.00896	0	0.00056	0	-1e-05	0	1e-05	-0.01887	0	0.00421	0.151202	2	Cd2-P4-H38-C14-N2-Cl4-O16	0.085053	0.217707	['[OH2][Cd]([OH2])[OH2]']	['COP(=O)(C(P(=O)(N1CCCCC1)[O])(Cl)Cl)[O]']	80	2.03775	Polar	equal	Converged
IVEFOG_FSR	['1']	[19]	[1]	[1, 1]	[19 19]	vasp	[1.121]	-0.05099	-0.08182	-0.11176	0	-0.01731	0	-0.00061	-0.00247	-0.00334	-0.00427	-0.00123	-0.00058	-0.00935	-0.0358	0.00355	0	-0.01941	0	0.150462	m	C40-H68-K2-N2-O2	0.0878175	0.192722			114	1.13774	Polar	equal	Converged
ECOXAX_FSR	['1', '6']	[11, 24]	[1, 5]	[1, 1, 5, 5]	[11 11 24 24]	vasp	[1.116, 2.76]	-6e-05	4e-05	-0.00018	0.00843	-0.0001	-0.02752	0.07344	0.08513	0.07334	0	0.06774	0	0.00019	-0.00014	0.00044	-0.00962	0.00024	-0.02367	0.15036	2	Na2-Cr2-H54-C30-N2-O12	0.0502992	0.145925	['[Na]', '[O][Cr]']	['[O]C1CCCCC1[O]']	102	1.48004	Polar	equal	Converged
JOMVIQ_FSR	['12']	[48]	[2]	[2, 2]	[48 48]	vasp	[2.652]	-0.00288	-0.00299	0.00104	0	0.0498	0	-7e-05	-3e-05	0	-0.02026	0	0	0.14163	0.02006	0.04509	0	0	0	0.150011	mm2	C56-Cd2-H40-N4-O8	0.111791	0.168005	['[Cd]']	['[O-]C(=O)c1cccc(c1)C=Cc1ccncc1']	110	1.63833	Polar	equal	Converged
FAPWAX_FSR	['1']	[19]	[1]	[1, 1]	[19 19]	vasp	[1.276]	0.01727	-0.00626	-0.07166	0	0.11348	0	5e-05	-1e-05	3e-05	0.06431	-3e-05	-0.0256	0.00319	0.08288	0.07658	0	-0.00184	0	0.149386	m	B2-C8-H2-K2-N6-O4	0.148139	0.126899	['[K]']	['N#C[B](C(=O)O)(C#N)C#N']	24	1.60399	Polar	equal	Converged
CIMFIP_FSR	['12']	[30]	[2]	[2, 2, 2, 2]	[30 30 30 30]	vasp	[2.08]	-1e-05	0	-1e-05	0	-0.00052	0	-0.00016	2e-05	-0.00041	0.02755	0	0	0.09869	0.0672	0.0895	0	0	0	0.149218	mm2	Zn4-H12-C16-N12-O16	0.18049	0.238508	['[Zn]']	['O=N(=O)C1=NC=C[N]1', '[O-]C=O']	60	2.0797	Polar	equal	Converged
VEWJOZ_FSR	['7']	[25]	[2]	[2]	[25]	vasp	[2.494]	0.12151	-0.00195	-0.02208	-0.00528	-0.00695	0.01867	-0.00638	0.07893	-0.05504	0.01525	-0.02639	0.00682	0.0617	-0.04894	-0.04089	0.01081	0.05226	0.01711	0.149155	1	Mn1-H19-C23-N3-O8	0.133591	0.228699			54	1.64371	Polar	equal	Converged
ROSKIV_FSR	['12']	[30]	[2]	[2, 2, 2, 2]	[30 30 30 30]	vasp	[2.167]	0	0	-1e-05	0	0.03586	0	0.0003	4e-05	0.00028	0.01896	0	0	0.13247	0.02311	-0.06184	0	0	0	0.148009	mm2	Zn4-H24-C36-N16-O8	0.0431651	0.189996	['[Zn]']	['[O-]C(=O)Cc1ccc(cc1)C1=NN=N[N]1']	88	1.81215	Polar	equal	Converged
CICBOI_FSR	['12']	[48]	[2]	[2, 2]	[48 48]	vasp	[2.476]	0	0	0	0	0.00435	0	0.0001	-5e-05	0	-0.01949	0	0	-0.09771	-0.05088	-0.09749	0	0	0	0.147106	mm2	C20-Cd2-H24-N12-S4	0.13615	0.209152	['[Cd]']	['[S]C#N']	62	1.8815	Polar	equal	Converged
NOQDII_FSR	['12']	[48]	[2]	[2, 2]	[48 48]	vasp	[2.245]	0.10455	-0.00031	-0.00197	0	0.02621	0	3e-05	-1e-05	-1e-05	-0.02573	-2e-05	0.02716	0.09588	-0.01018	0.0176	0	0.02572	0	0.147082	m	C50-Cd2-H36-N12-O12-S2	0.0511816	0.187521	['[Cd]']	['O=C(c1cccc(n1)C(=O)Nc1cccnc1)Nc1cccnc1', '[O-]C(=O)CSc1ncccc1C(=O)[O-]']	114	1.6091	Polar	equal	Converged
MISKEH_FSR	['1']	[3]	[1]	[1, 1, 1, 1]	[3 3 3 3]	vasp	[1.151]	0	0	0	0	-0.06996	0	-4e-05	0	3e-05	0.04887	0	0	0.04595	0.05918	-0.12647	0	0	0	0.146998	mm2	Li4-H36-C20-I4-N4-O8	0.0875376	0.221789	['[Li]']	['[O-]C(=O)C1CCC[NH2]1']	76	2.05951	Polar	equal	Converged
JAYVOV_FSR	['12']	[48]	[2]	[2, 2]	[48 48]	vasp	[2.418]	1e-05	3e-05	4e-05	-0.03087	-3e-05	-0.00315	-0.11314	0.0893	0.01989	0	0.01096	0	9e-05	-1e-05	4e-05	-0.01988	-1e-05	-0.02857	0.145914	2	Cd2-H20-C16-S4-N10-Cl2-O4	0.0940534	0.0826221	['Cl[Cd]']	['[O-]C(=O)CN']	58	2.17013	Polar	equal	Converged
OCEQIX_FSR	['9']	[27]	[2]	[2, 2, 2, 2]	[27 27 27 27]	vasp	[1.908]	0.0001	5e-05	0.00012	0	-0.08117	0	5e-05	2e-05	-2e-05	-0.07618	0	0	-0.12196	0.00184	-0.07998	0	0	0	0.145858	mm2	C20-Co4-H20-N8-O8	0.23226	0.31343	['[Co]']	['C1=N[CH]C=N1', '[O-]C(=O)CCC(=O)[O-]']	60	1.92144	Polar	equal	Converged
COXQUB_FSR	['12']	[48]	[2]	[2, 2, 2, 2]	[48 48 48 48]	vasp	[2.636]	0.00063	0.00026	3e-05	0.01193	8e-05	0.05091	0.018	-0.08678	0.00733	0	0.01245	0	2e-05	0.00013	0.00021	-0.0541	3e-05	-0.1252	0.145813	2	C40-Cd4-H44-N8-O22-S4	0.0811985	0.170457	['[OH2][Cd]', '[OH2][Cd][OH2]']	['[O]S(=O)(=O)[O]', 'n1ccc(cc1)c1ccncc1']	122	1.88945	Polar	equal	Converged
RITDIJ_FSR	['12']	[48]	[2]	[2, 2]	[48 48]	vasp	[2.425]	-1e-05	-2e-05	0	0	0.09091	0	-3e-05	-6e-05	-3e-05	-0.00281	0	0	0.02385	0.14294	-0.01604	0	0	0	0.145801	mm2	C28-Cd2-H28-N8-O8	0.120374	0.11551	['[Cd]']	['[O]NC(=O)c1ccc(cc1)N']	74	1.88219	Polar	equal	Converged
EKOFIU01_FSR	['12']	[30]	[2]	[2, 2]	[30 30]	vasp	[2.45]	0.06693	0.01035	0.09361	0.01321	-0.01987	0.03562	0.03443	-0.08711	-0.02551	-0.03604	0.01325	0.00799	0.04328	-0.0107	0.06102	-0.03254	-0.01386	0.01961	0.14534	1	Zn2-H34-C26-S2-N6-O14	0.0665144	0.138341	['[OH2][Zn][OH2]']	['NC(C(=O)[O-])CS([O])([O])[O]', 'n1ccc(cc1)c1ccncc1']	84	1.63784	Polar	equal	Converged
UDISIK_FSR	['5']	[23]	[3]	[3]	[23]	vasp	[2.506]	-2e-05	-4e-05	0.0001	0.14504	0	0	-4e-05	-0.00029	-4e-05	0	-0.01696	0	-1e-05	3e-05	3e-05	0	0	-0.03887	0.14504	222	C10-F3-H8-N2-V1	0.0346	0.14893	['F[V](F)F']	['n1ccc(cc1)c1ccncc1']	24	1.85376	Non-polar	equal	Converged
SAZVAR_FSR	['12']	[30]	[2]	[2, 2]	[30 30]	vasp	[2.199]	2e-05	1e-05	0	-0.02528	0	-0.00658	0.07275	0.12476	0.00249	0	0.01269	0	-1e-05	-1e-05	0	-0.03996	0	-0.03086	0.145	2	Zn2-H40-C32-N8-O8	0.122958	0.171743	['[Zn]']	['[O-]C(=O)c1cccc(c1)C(=O)[O-]']	90	1.58047	Polar	equal	Converged
EDEYES_FSR	['12']	[48]	[2]	[2, 2]	[48 48]	vasp	[2.491]	0.03029	0.11341	0.06349	0	0.04485	0	1e-05	4e-05	0.00021	-0.00965	-2e-05	0.0069	-0.0079	0.04657	-0.02491	0	0.02181	0	0.144708	m	C24-Cd2-H28-N8-O14-S2	0.075557	0.154159	['[OH2][Cd]']	['c1ccc(cc1)CSCc1nccnc1']	78	1.87315	Polar	equal	Converged
WIJDID_FSR	['11']	[29]	[1]	[1, 1, 1, 1, 1, 1, 1, 1, 1, 1, 1, 1]	[29 29 29 29 29 29 29 29 29 29 29 29]	vasp	[0.881]	0	1e-05	-6e-05	0	0.13965	0	-3e-05	-1e-05	-0.00033	0.01624	0	0	0.05161	0.02696	-0.13214	0	0	0	0.144401	mm2	Cu12-H24-C12-N24-Cl12	0.419953	0.55898			84	2.78454	Polar	equal	Converged
PEYGAC_FSR	['12']	[30]	[2]	[2, 2, 2, 2]	[30 30 30 30]	vasp	[2.008]	1e-05	1e-05	1e-05	0	0.00585	0	-0.00017	-0.0001	-0.00011	0.0724	0	0	-0.14211	-0.01542	-0.01702	0	0	0	0.143954	mm2	Zn4-H16-C8-N16-Cl8	0.235728	0.20287	['Cl[Zn]Cl']	['NC(=[NH2])[N]C#N']	52	1.98744	Polar	equal	Converged
CICJEE_FSR	['12']	[30]	[2]	[2, 2]	[30 30]	vasp	[2.705]	-1e-05	-7e-05	1e-05	0	0.06707	0	-8e-05	-0.00144	-0.0007	0.04842	0	0	0.01373	0.05635	0.13135	0	0	0	0.143591	mm2	C52-H48-N8-O24-S4-Zn2	0.109009	0.238898	['[OH2][Zn][OH2]']	['n1ccc(cc1)c1ccncc1']	138	1.65861	Polar	equal	Converged
LOVSOE_FSR	['11']	[29]	[1]	[1]	[29]	vasp	[0.241]	-0.06396	-0.02773	-0.07385	0	-0.04336	0	0.0001	9e-05	7e-05	-0.00485	2e-05	0.02289	-0.04385	-0.03108	-0.0863	0	0.02717	0	0.143225	m	C11-Cu1-H6-N7-S1	0.0505405	0.153765	['[Cu]']	['[S]C#N']	26	1.73215	Polar	equal	Converged
FIQZEM_FSR	['12']	[48]	[2]	[2, 2, 2, 2]	[48 48 48 48]	vasp	[2.72]	1e-05	3e-05	1e-05	-0.14238	0	0	0	2e-05	2e-05	0	-0.01101	0	-1e-05	-1e-05	0	0	0	0.01463	0.14238	222	Cd4-H52-C60-N4-O20	0.00404	0.14137	['[Cd]']	['[O-]C(=O)c1ccc(c2c1cccc2)C(=O)[O-]']	140	1.93017	Non-polar	equal	Converged
QOXFOY_FSR	['12']	[30]	[2]	[2, 2]	[30 30]	vasp	[2.198]	-0.06992	0.03047	-0.00105	0.03604	0.02781	-0.09719	-0.09553	-0.03101	-0.05396	-0.014	0.04346	0.03997	0.01936	-0.00826	-0.01651	-0.03987	0.00986	0.01867	0.141931	1	Zn2-P4-H24-C18-O8	0.145792	0.24884	['[Zn]']	['CCP(=O)(c1ccccc1)CP(=O)([O])[O]']	56	1.74746	Polar	equal	Converged
NOKDIA_FSR	['12']	[30]	[2]	[2, 2]	[30 30]	vasp	[2.07]	1e-05	-3e-05	-1e-05	0.06359	2e-05	-0.03413	-0.02254	-0.10802	-0.08562	0	0.02281	0	2e-05	-1e-05	-3e-05	-0.02804	1e-05	-0.00687	0.141518	2	Zn2-H28-C28-N8-O8	0.164806	0.172498	['[Zn]']	['[O-]C(=O)CC(C(=O)[O-])N']	74	1.70619	Polar	equal	Converged
SAWVOB_FSR	['11']	[29]	[1]	[1]	[29]	vasp	[0.737]	-0.0205	-0.02895	0.002	0.02089	0.04336	-0.06396	0.00763	-0.09033	-0.0107	0.01063	-0.02401	-0.04754	-0.0069	0.02682	0.07915	-0.08541	0.00612	0.00849	0.140872	1	Cu1-H9-C13-Br1-N1	0.164819	0.236002			25	2.06329	Polar	equal	Converged
NIVXAU_FSR	['8']	[26]	[2]	[2, 2]	[26 26]	vasp	[1.071]	-0.07069	-0.04091	-0.04789	0	-0.03934	0	-0.00029	-8e-05	-0.00088	0.0012	0.0004	-0.02629	-0.05858	-0.09497	0.01079	0	-0.01449	0	0.140724	m	C24-Fe2-H26-N2-S4	0.0828656	0.124603	['[Fe]']	['[S]c1ccccc1']	58	1.53467	Polar	equal	Converged
NATCER_FSR	['12']	[30]	[2]	[2, 2]	[30 30]	vasp	[2.25]	-2e-05	-0.00034	1e-05	-0.001	2e-05	0.00314	-0.01831	-0.11349	0.08047	0	0.0096	0	9e-05	-0.0001	5e-05	-0.02618	-8e-05	-0.00931	0.140652	2	Zn2-H24-C32-N4-O10	0.0914808	0.228757	['[OH2][Zn]']	['[O-]C(=O)C=CC(=O)[O-]']	72	1.7035	Polar	equal	Converged
JUGMUV_FSR	['12']	[48]	[2]	[2, 2]	[48 48]	vasp	[2.658]	0.12953	0.04698	0.01077	0	0.00451	0	5e-05	-1e-05	1e-05	-0.0261	1e-05	0.07731	0.04166	-0.04716	-0.02904	0	0.01076	0	0.140346	m	C36-Cd2-H26-N22	0.0285995	0.136632	['[Cd]']	['[N][N][N]', 'c1ccc(cc1)c1nnc(n1c1ccncc1)c1ccccn1']	86	1.7917	Polar	equal	Converged
IFIWIE_FSR	['10']	[28]	[2]	[2, 2]	[28 28]	vasp	[2.067]	-1e-05	-4e-05	0	0.10643	0	0	6e-05	-5e-05	-8e-05	0	0.14026	0	1e-05	-4e-05	1e-05	0	0	0.06932	0.14026	222	C8-H8-Ni2-O12	0.10202	0.06547			30	2.63895	Non-polar	equal	Converged
TUNROL_FSR	['12']	[48]	[2]	[2, 2]	[48 48]	vasp	[2.64]	-2e-05	3e-05	-3e-05	0.02536	1e-05	0.01219	0.0094	0.072	0.1184	0	-0.01925	0	-3e-05	0.00012	0.00025	0.03347	4e-05	-0.03713	0.14022	2	Cd2-H32-C24-S2-N8-O16	0.0445497	0.138169	['[OH2][Cd][OH2]']	['[O]S(=O)(=O)[O]']	84	1.87957	Polar	equal	Converged
TECSOJ_FSR	['2']	[20]	[2]	[2, 2]	[20 20]	vasp	[2.443]	0.03689	0.00373	-0.03952	-0.00614	0.00478	0.0009	-0.01045	0.11011	-0.04999	0.00663	0.01696	0.00715	-0.01215	0.0499	-0.04736	-0.00465	-0.03757	0.00183	0.140158	1	Ca2-H24-C8-O19	0.0311936	0.142271			53	1.80194	Polar	equal	Converged
ESATEY_FSR	['12']	[30]	[2]	[2, 2, 2, 2]	[30 30 30 30]	vasp	[2.369]	0	-1e-05	-1e-05	0	0.07827	0	0	5e-05	1e-05	0.00392	0	0	-0.02479	0.04169	0.13073	0	0	0	0.139438	mm2	C68-H48-N8-O20-Zn4	0.112639	0.15939	['[OH2][Zn]']	['[O-]C(=O)c1cc2ccccc2cc1C(=O)[O-]', 'n1ccc(cc1)[N][N]c1ccncc1']	148	1.61478	Polar	equal	Converged
VENDAU_FSR	['14']	[50]	[4]	[4, 4, 4, 4]	[50 50 50 50]	vasp	[2.846]	0	0	-1e-05	0	0.03086	0	0	1e-05	0	0.04823	0	0	-0.03695	0.01096	-0.13369	0	0	0	0.139135	mm2	Sn4-H52-C24-S4-N12	0.114825	0.0542013			96	1.84269	Polar	equal	Converged
MOGVEK_FSR	['12']	[48]	[2]	[2, 2, 2, 2]	[48 48 48 48]	vasp	[2.563]	0	-2e-05	-1e-05	0.07945	0	0	0	0	0	0	-0.13741	0	0	0	0	0	0	-0.06015	0.13741	222	Cd4-H12-C8-Br4-N16	0.03956	0.09785	['Br[Cd]']	['NC1=N[N]C=N1', 'NC1=[N]=CN=N1']	44	3.35772	Non-polar	equal	Converged
SAWWAO_FSR	['11']	[29]	[1]	[1, 1, 1, 1]	[29 29 29 29]	vasp	[0.721]	0	0	1e-05	0	0.02623	0	-0.00042	-0.00017	-0.0007	0.07784	0	0	-0.03204	-0.02213	0.13177	0	0	0	0.137405	mm2	Cu4-H36-C40-Br4-N4	0.12498	0.192739			88	2.09138	Polar	equal	Converged
PIZQEW_FSR	['11']	[29]	[2]	[2, 2]	[29 29]	vasp	[1.11]	0.00021	0.07987	0.00699	0.02101	0.00041	0.00587	0.01826	-0.04086	0.02336	-0.00339	0.01237	0.00933	0.01866	0.07436	0.03348	0.06546	0.02228	-0.03782	0.137261	1	Cu2-H40-C30-N10-O6	0.0145994	0.13491			88	1.45039	Polar	equal	Converged
NISWUI_FSR	['12']	[30]	[2]	[2, 2]	[30 30]	vasp	[2.273]	0.10574	0.0028	0.02512	0	-0.02584	0	-0.00014	7e-05	1e-05	-0.00038	4e-05	0.03414	-0.04518	-0.10852	0.00138	0	0.01563	0	0.137051	m	Zn2-H28-C32-Cl4-O14	0.129101	0.23936			80	1.67234	Polar	equal	Converged
GIHKEO_FSR	['1']	[11]	[1]	[1, 1]	[11 11]	vasp	[1.249]	0.00016	-1e-05	0.0001	0.02381	5e-05	0.01087	-0.12823	-0.0242	0.04122	0	0.00708	0	-0.00015	-9e-05	0.00013	0.03619	-8e-05	0.0056	0.137032	2	Br2-C12-H16-N2-Na2-O7-S2	0.102607	0.0866794	['O', '[Na]']	['Br[N]S(=O)(=O)c1ccccc1']	43	1.92091	Polar	equal	Converged
DAMTUJ_FSR	['11']	[29]	[2]	[2]	[29]	vasp	[1.629]	-0.09152	-0.04334	0.06295	0.01266	-0.01352	0.01424	0.03119	0.03026	0.0225	0.00329	-0.01862	-0.08655	-0.01965	-0.07883	-0.03129	0.01244	-0.06551	-0.05797	0.136432	1	Cu1-H38-C26-N4-O8	0.0475371	0.155788	['[Cu]']	['CC(C(N1C=CN([CH]1)C(C(=O)[O-])C(C)C)C(=O)[O-])C']	77	1.40927	Polar	equal	Converged
AXAWIH_FSR	['12']	[80]	[2]	[2]	[80]	vasp	[1.966]	0.00114	0.00036	-0.00014	-0.03943	0.00042	0.01932	-0.01843	0.1189	-0.04286	0	-0.04716	0	-0.0005	-2e-05	0.00073	0.04351	-0.00018	-0.02557	0.136154	2	C34-Cl2-H30-Hg1-N6-O4	0.0975616	0.186122	['Cl[Hg]Cl']	['O=C1Nc2cc(cc(c2)c2ccncc2)C(=O)N2CCCC2C(=O)Nc2cc(C(=O)N3C1CCC3)cc(c2)c1ccncc1']	77	1.60165	Polar	equal	Converged
PUHWAS_FSR	['2']	[20]	[2]	[2, 2]	[20 20]	vasp	[2.573]	1e-05	-6e-05	-5e-05	-0.02155	2e-05	-0.02827	0.1047	-0.07496	-0.02213	0	-0.03742	0	4e-05	1e-05	-8e-05	-0.05964	-2e-05	0.00124	0.135908	2	Br4-C20-Ca2-H36-N4-O8	0.0472353	0.151709	['[Ca]']	['[O-]C(=O)C1CCC[NH2]1']	74	1.84962	Polar	equal	Converged
QOZNAV_FSR	['1']	[11]	[1]	[1, 1, 1, 1]	[11 11 11 11]	vasp	[1.197]	-2e-05	-2e-05	-3e-05	0	0.13581	0	3e-05	3e-05	0.0001	0.07581	0	0	0.02463	0.04832	0.03937	0	0	0	0.13581	mm2	C4-H8-N20-Na4-O12	0.177625	0.20918	['[Na]1[OH2][Na][OH2]1']	['O=N(=O)C1=NN=N[N]1', 'O=N(=O)C1=N[N]N=N1']	48	1.64227	Polar	equal	Converged
GEDLOS_FSR	['12']	[30]	[2]	[2, 2]	[30 30]	vasp	[2.266]	-0.05259	-0.02142	-0.06554	0	-0.03329	0	-8e-05	5e-05	-5e-05	-0.02292	-6e-05	0.05115	0.10998	0.00095	0.02607	0	-0.00301	0	0.135666	m	C40-H32-N12-O8-Zn2	0.110069	0.159942	['[Zn]']	['[O-]C(=O)c1ccc(cc1)n1cnnc1C']	94	1.63352	Polar	equal	Converged
DURMEJ_FSR	['1']	[19]	[1]	[1, 1, 1, 1]	[19 19 19 19]	vasp	[1.242]	-0.00013	-0.0005	-4e-05	-0.0134	0	0	-4e-05	-0.00017	-1e-05	0	-0.13558	0	0	-2e-05	0	0	0	-0.00867	0.13558	222	K4-H32-C32-N4-O20	0.06287	0.14846	['[K]']	['[O-]C(=O)C1N2C(OC1=CCO)CC2=O']	92	1.68703	Non-polar	equal	Converged
VEFTEF_FSR	['11']	[29]	[1]	[1, 1]	[29 29]	vasp	[0.737]	-0.00013	9e-05	-0.00015	-0.00842	-0.00014	-0.0838	-0.04886	-0.12349	0.02275	0	0.01256	0	-8e-05	3e-05	-7e-05	0.02042	-6e-05	-0.004	0.135323	2	Cu2-H16-C18-I2-N4	0.227723	0.279176			42	2.39713	Polar	equal	Converged
TELMOO01_FSR	['1']	[19]	[1]	[1, 1]	[19 19]	vasp	[1.405]	2e-05	0	1e-05	0.02308	1e-05	-0.02811	-0.0461	-0.02158	0.06679	0	-0.10601	0	2e-05	-3e-05	-1e-05	-0.01364	0	-0.03051	0.13524	2	K2-H20-C30-N2-O10	0.0548012	0.154486			64	1.69425	Polar	equal	Converged
MOVDUW_FSR	['12']	[48]	[2]	[2, 2, 2, 2]	[48 48 48 48]	vasp	[2.447]	0	0	0	-0.06026	0	0	0	0	0	0	-0.0444	0	0	0	0	0	0	0.1352	0.1352	222	Cd4-H24-C16-N8-O28	0.03031	0.13107	['[Cd]']	['[O-]C(=O)CC(C(=O)[O-])[NH3]']	80	2.62534	Non-polar	equal	Converged
NEMJOF01_FSR	['12']	[30]	[2]	[2, 2]	[30 30]	vasp	[1.907]	-6e-05	-3e-05	5e-05	0	0.10588	0	0	0	1e-05	0.0671	0	0	-0.00653	0.08077	0.10788	0	0	0	0.134924	mm2	C22-Cl4-H20-N8-O2-Zn2	0.11647	0.148237			58	1.64584	Polar	equal	Converged
UKUFAH_FSR	['1']	[19]	[1]	[1, 1]	[19 19]	vasp	[1.158]	1e-05	1e-05	0	0.00582	0	-0.08876	-0.12304	-0.02969	0.02742	0	0.03776	0	0	0	0	-0.00112	0	0.01576	0.1349	2	K2-H34-C24-O2	0.0516504	0.185053	['[K]']	['CC(c1cccc(c1[O])C(C)C)C']	62	1.17742	Polar	equal	Converged
PINKOP_FSR	['12']	[48]	[2]	[2, 2]	[48 48]	vasp	[2.591]	5e-05	1e-05	0	-0.02389	2e-05	-0.03354	0.0529	-0.11687	-0.04061	0	-0.00054	0	0	-1e-05	0	-0.08222	0	-0.04263	0.13456	2	Cd2-H20-C44-N8-O16-F8	0.0252188	0.134201	['[Cd]']	['Fc1cc(F)cc(c1)c1[nH]c(c(n1)C(=O)O)C(=O)[O-]']	98	1.9425	Polar	equal	Converged
FIJNOC_FSR	['12']	[48]	[2]	[2, 2, 2, 2]	[48 48 48 48]	vasp	[2.621]	0.00883	0.07551	-0.06255	0	-0.01667	0	8e-05	0.00012	0.00014	0.04065	8e-05	-0.00439	-0.02267	0.04524	-0.07884	0	-0.02082	0	0.13451	m	C48-Cd4-H40-N24-O32	0.116244	0.243266	['[OH2][Cd]']	['[O]N(=O)=O', 'c1ccc(cn1)c1nnc(o1)c1cccnc1']	148	1.94968	Polar	equal	Converged
ZOMNOG_FSR	['12']	[30]	[2]	[2]	[30]	vasp	[2.442]	-0.00022	-5e-05	6e-05	-0.02341	-1e-05	0.0796	0.09906	0.08993	-0.00102	0	0.00782	0	0.0001	4e-05	1e-05	0.0368	3e-05	0.02395	0.134024	2	C14-H18-N4-O4-S1-Zn1	0.0599588	0.134022			42	1.16646	Polar	equal	Converged
KIZQAN_FSR	['12']	[48]	[2]	[2, 2]	[48 48]	vasp	[2.433]	8e-05	-2e-05	4e-05	0.02491	0	-0.06081	-0.09799	-0.03862	-0.08242	0	-0.00829	0	5e-05	3e-05	4e-05	-0.05503	-1e-05	-0.0218	0.133998	2	Cd2-H10-C12-N6-Cl4	0.0418565	0.145021			34	2.36013	Polar	equal	Converged
HIXWIU01_FSR	['12']	[48]	[2]	[2, 2, 2, 2, 2, 2, 2, 2]	[48 48 48 48 48 48 48 48]	vasp	[2.381]	-1e-05	-1e-05	0	-0.0818	0	0	0	0	0	0	-0.13396	0	0	0	0	0	0	0.03656	0.13396	222	Cd8-H40-C32-O52	0.08592	0.11635			132	2.37653	Non-polar	equal	Converged
CAVVAY_FSR	['12']	[30]	[2]	[2, 2]	[30 30]	vasp	[2.296]	-5e-05	2e-05	-2e-05	0.01485	0	0.09502	0.03912	-0.05745	0.11406	0	-0.00328	0	1e-05	-6e-05	4e-05	0.04646	-3e-05	-0.0265	0.133609	2	Zn2-P2-H30-C34-N4-O12	0.0676233	0.161831	['[OH2][Zn]']	['[O-]C(=O)c1ccc(cc1)P(=O)(O)[O]']	84	1.75915	Polar	equal	Converged
CAFUMT01_FSR	['2']	[20]	[2]	[2, 2, 2, 2]	[20 20 20 20]	vasp	[2.529]	5e-05	-0.00032	-2e-05	0	0.06836	0	-4e-05	4e-05	3e-05	0.00765	0	0	-0.11348	0.06981	-0.00915	0	0	0	0.133547	mm2	Ca4-H32-C16-O28	0.0231906	0.148748	['O', '[Ca]']	['[O-]C(=O)C=CC(=O)[O-]']	80	1.72279	Polar	equal	Converged
DOKPAV_FSR	['1']	[19]	[1]	[1, 1]	[19 19]	vasp	[1.306]	0.0906	0.05161	0.01235	0	0.01675	0	2e-05	0	0	0.00016	0	0.03486	-0.07093	-0.04043	-0.00953	0	0.03042	0	0.133469	m	C42-H42-K2-O28	0.231364	0.283091	['[K]']	['COC(=O)C1=C(C(=O)OC)C(=C(C(=C([C]1C(=O)OC)C(=O)OC)C(=O)OC)C(=O)OC)C(=O)OC']	114	1.5141	Polar	equal	Converged
TUPSIG01_FSR	['1']	[19]	[1]	[1, 1]	[19 19]	vasp	[1.174]	-0.01005	0.01767	-0.03733	0	-0.03114	0	-2e-05	-1e-05	0	-0.00293	1e-05	-0.04628	-0.09138	-0.00534	-0.05397	0	-0.06893	0	0.133069	m	C24-H48-I6-K2-O12	0.00919163	0.130946			92	2.15182	Polar	equal	Converged
NASCIV_FSR	['12']	[48]	[2]	[2, 2, 2, 2, 2, 2, 2, 2]	[48 48 48 48 48 48 48 48]	vasp	[2.672]	-0.00232	0.00238	6e-05	0	-0.00264	0	-1e-05	0	0	0.0026	0	0	0.09403	-0.09405	-1e-05	0	0	0	0.133034	-42m	C28-Cd8-H20-N48-O8	0.0434446	0.17647	['[Cd]']	['[N]1C=NN=N1', '[O-]C(=O)c1ccc(cc1)C(=O)[O-]']	112	2.07106	Non-polar	equal	Converged
LUGLUU_FSR	['12']	[30]	[2]	[2, 2, 2, 2]	[30 30 30 30]	vasp	[2.069]	-0.09735	-0.02934	-0.028	0	0.05992	0	0	0	2e-05	-0.02159	-2e-05	-0.00321	0.03235	-0.03963	0.08645	0	-0.00303	0	0.132445	m	Zn4-H16-C24-N20-Cl4	0.138021	0.230679	['Cl[Zn]']	['n1ccc(cc1)C1=NN=N[N]1', 'n1ccc(cc1)C1=N[N]N=N1']	68	1.9829	Polar	equal	Converged
LOVQUI_FSR	['12']	[30]	[2]	[2, 2]	[30 30]	vasp	[2.328]	0	-1e-05	0	-0.01774	0	0.01357	0.01526	-0.12245	-0.02675	0	-0.03911	0	0	-1e-05	-1e-05	0.03752	0	-0.0076	0.132182	2	Zn2-H56-C40-S4-N20-O16	0.173415	0.202438	['[Zn]']	['CSCCC(C(=O)[O-])N[C]1N=C(N)C(=N[O])C(=O)N1C', 'CSCCC(C(=O)[O-])Nc1nc(N)c(c(=O)n1C)[N][O]']	138	1.50112	Polar	equal	Converged
XOHTEU_FSR	['7']	[25]	[2]	[2]	[25]	vasp	[2.57]	0.03425	0.0046	0.1023	0.04207	0.02462	0.03684	0.03428	0.02597	0.01705	0.04454	0.01315	-0.00123	0.04875	-0.00742	-0.02335	0.01792	-0.00797	-0.01545	0.132069	1	Mn1-H22-C28-O12	0.0996632	0.143344			63	1.51221	Polar	equal	Converged
QAVDOG_FSR	['11']	[29]	[2]	[2, 2, 2, 2]	[29 29 29 29]	vasp	[1.793]	-0.01321	-0.01366	-0.01583	0.00029	-0.12914	0.00158	-0.00112	-0.00419	0.00021	0.01878	-0.00081	-0.0016	0.03527	0.03896	0.02749	0.00052	-0.00023	0.00044	0.132042	mm2	C8-Cu4-H12-N16-O16-S2	0.240063	0.266965	['[Cu]']	['NN1C(=O)N[N]C1=O', '[O]S(=O)(=O)[O]']	58	2.45539	Polar	equal	Converged
RESSAK_FSR	['10']	[28]	[2]	[2, 2]	[28 28]	vasp	[1.506]	-0.00082	-0.00063	-0.00067	0.00279	0.00025	-0.00694	-0.07768	-0.09684	-0.04396	0	0.00831	0	-0.00023	-0.00049	-0.0006	-0.00379	-0.00016	0.02317	0.131968	2	C36-H26-N4-Ni2-O10-S1	0.0562922	0.111259	['[OH2][Ni]']	['[O-]C(=O)c1c(cccc1C(=O)[O-])Sc1cccc(c1C(=O)[O-])C(=O)[O-]', 'n1ccc(cc1)c1ccncc1']	79	1.25845	Polar	equal	Converged
DIKRUL_FSR	['1']	[19]	[1]	[1, 1, 1, 1, 1, 1, 1, 1]	[19 19 19 19 19 19 19 19]	vasp	[1.216]	9e-05	-8e-05	8e-05	0.06924	0	0	-3e-05	-1e-05	-3e-05	0	0.13195	0	-2e-05	1e-05	-2e-05	0	0	0.05425	0.13195	222	K8-B4-H20-C16-O28	0.05635	0.14019	['[K]']	['OB(O)O', '[O-]C(=O)C=CC(=O)[O-]']	76	1.88264	Non-polar	equal	Converged
SEJNEB_FSR	['12']	[30]	[2]	[2, 2]	[30 30]	vasp	[2.013]	-0.06143	0.01373	-0.04476	0.00232	-0.00577	0.0258	0.01896	0.03644	0.08455	-0.06011	0.01154	-0.03221	0.00663	-0.02185	0.03468	-0.00053	0.00446	0.00105	0.1314	1	Zn2-H44-C38-N4-Cl4-O8	0.0712523	0.149331	['Cl[Zn]Cl']	['COc1ccc2c(c1)c(ccn2)C(C1C[NH]2CCC1CC2C(=O)[O-])O']	100	1.57239	Polar	equal	Converged
MINQAC_FSR	['1']	[3]	[1]	[1, 1]	[3 3]	vasp	[1.131]	0	-5e-05	0.00012	-0.07318	-2e-05	0.04009	0.02458	0.08991	0.02345	0	-0.03119	0	0.00011	0.00105	-0.00019	0.10133	-0.00011	-0.02033	0.131382	2	Li2-H10-C4-N12-O6	0.0740088	0.113122	['[Li][OH2]']	['O=N(=O)[N]c1nnnn1C']	34	1.76748	Polar	equal	Converged
UCOCEV_FSR	['2']	[38]	[2]	[2, 2]	[38 38]	vasp	[2.648]	-0.00019	-1e-05	-0.0001	0.03921	7e-05	-0.02212	-0.01919	-0.1157	-0.05874	0	-0.00706	0	5e-05	9e-05	7e-05	-0.00198	5e-05	0.00521	0.131358	2	Sr2-H36-C24-O28	0.0426597	0.133017	['[OH2][Sr][OH2]']	['OCC(C1OC(=O)C(=C1[O])O)O']	90	1.93807	Polar	equal	Converged
CIZMOP_FSR	['12']	[48]	[2]	[2, 2, 2]	[48 48 48]	vasp	[2.526]	-0.00074	4e-05	-0.00045	0.02107	0.00012	-0.01768	0.09178	0.06644	0.01633	0	-0.06441	0	0.00012	3e-05	1e-05	0.00341	-2e-05	-0.0308	0.131353	2	C60-Cd3-H42-N12-O16	0.100801	0.185235	['[Cd]', '[OH2][Cd]']	['[O-]C(=O)c1c(cccc1C(=O)[O-])Oc1ccc(cc1)C(=O)[O-]', 'c1ncn(c1)c1cc(cc(c1)n1cncc1)n1cncc1']	133	1.65939	Polar	equal	Converged
CEHLOT_FSR	['12']	[30]	[2]	[2]	[30]	vasp	[2.199]	-0.00057	-0.00059	-0.00091	-0.12752	0.00085	0.02658	0.0269	0.0822	0.00763	0	-0.00473	0	0.00012	0.00016	0.00035	-0.00776	-0.00025	-0.04444	0.130281	2	C26-H30-N4-O6-Zn1	0.134425	0.151459			67	1.47563	Polar	equal	Converged
QQQDHD01_FSR	['1']	[11]	[1]	[1, 1, 1, 1, 1, 1, 1, 1]	[11 11 11 11 11 11 11 11]	vasp	[1.261]	2e-05	0	0	0	-0.00524	0	8e-05	5e-05	-1e-05	0.0061	0	0	-0.02284	-0.02704	-0.12521	0	0	0	0.130117	mm2	Na8-H16-C32-O16	0.00410864	0.127067	['[Na]']	['[O-]C(=O)c1ccc(cc1)C(=O)[O-]']	72	1.94578	Polar	equal	Converged
FITFIA_FSR	['12']	[30]	[2]	[2, 2]	[30 30]	vasp	[1.916]	-0.00019	-0.00021	-0.00011	0.025	1e-05	0.044	0.07995	0.09391	0.02843	0	0.03007	0	-5e-05	0	-2e-05	0.01774	-2e-05	0.03526	0.130091	2	Zn2-H26-C20-N10-O8	0.101785	0.152794			66	1.25728	Polar	equal	Converged
NIHMUO_FSR	['14']	[82]	[2]	[2]	[82]	vasp	[2.914]	3e-05	0.00011	0.00015	0.02446	0	0.04227	0.03925	0.07768	0.09626	0	-0.00715	0	-2e-05	-4e-05	-0.00015	-0.08201	3e-05	-0.02235	0.129969	2	C24-H16-N2-O4-Pb1	0.217407	0.2661			47	2.03956	Polar	equal	Converged
CUHBIQ01_FSR	['11']	[29]	[1]	[1, 1]	[29 29]	vasp	[0.296]	-1e-05	-1e-05	-3e-05	0.02151	0	-0.00482	-0.03402	-0.10584	-0.06641	0	0.00221	0	2e-05	1e-05	-2e-05	-0.01029	1e-05	0.01509	0.129517	2	Cu2-H28-C26-S2-N6	0.0494328	0.109428	['[Cu]']	['[S]C#N']	64	1.57295	Polar	equal	Converged
FATROJ_FSR	['12']	[30]	[2]	[2, 2]	[30 30]	vasp	[1.997]	0.07939	0.0751	0.05691	0	0.02264	0	1e-05	0	2e-05	-0.06519	-1e-05	0.05725	0.00547	-0.00902	-0.0695	0	0.04059	0	0.129431	m	C20-Cl2-H22-N8-O8-Zn2	0.0861112	0.12631			62	1.80291	Polar	equal	Converged
GELVID01_FSR	['10']	[28]	[2]	[2, 2, 2, 2, 2, 2]	[28 28 28 28 28 28]	vasp	[2.074]	0.0516	-0.05153	0	-0.10649	0	0	0.00043	-0.00031	8e-05	-0.00034	0.10674	-0.05105	1e-05	1e-05	1e-05	0	0	0	0.129074	32	Ni6-H24-C42-O30	0.0669281	0.189901	['[Ni]']	['[O-]C(=O)c1cc(O)c(c(c1)O)[O]']	102	1.55095	Non-polar	equal	Converged
RUVBAN_FSR	['12']	[30]	[2]	[2]	[30]	vasp	[2.298]	5e-05	1e-05	-6e-05	-0.0334	2e-05	-0.0493	-0.04073	-0.0005	-0.03791	0	0.00971	0	-2e-05	-5e-05	9e-05	-0.12459	-4e-05	0.00907	0.129062	2	C18-H12-N6-O4-Zn1	0.162843	0.276779	['[Zn]']	['[O-]C(=O)c1ccc(cc1)n1cnnc1']	41	1.68606	Polar	equal	Converged
HOQPUZ_FSR	['12']	[48]	[2]	[2, 2]	[48 48]	vasp	[2.353]	-2e-05	1e-05	0	-0.01545	2e-05	-0.01112	0.08671	-0.078	0.03545	0	-0.04155	0	0	0	0	-0.00584	0	0.00642	0.128786	2	Cd2-H38-C30-S4-N6-O14	0.0701902	0.189353	['[OH2][Cd]']	['[O-]C(=O)C(NS(=O)(=O)c1ccc(cc1)C)CSCC(=O)[O-]']	94	1.83798	Polar	equal	Converged
PIHRUU_FSR	['2']	[12]	[2]	[2, 2]	[12 12]	vasp	[2.178]	0	3e-05	-3e-05	-0.026	0	0	4e-05	0	3e-05	0	-0.05477	0	0	0	0	0	0	-0.12877	0.12877	222	C8-H8-Mg2-O12	0.02016	0.14893			30	1.75051	Non-polar	equal	Converged
USUBUG_FSR	['12']	[30]	[2]	[2, 2]	[30 30]	vasp	[1.939]	-0.12142	0.03549	0.019	0	-0.01378	0	3e-05	8e-05	4e-05	-0.01691	0	0.08029	-0.00269	0.01519	0.01567	0	0.03954	0	0.128762	m	C4-H8-N20-Zn2	0.11149	0.236952	['[Zn]']	['NC1=NN=N[N]1']	34	1.12821	Polar	equal	Converged
PORZON_FSR	['12']	[48]	[2]	[2, 2, 2, 2]	[48 48 48 48]	vasp	[2.445]	0.01512	-0.03049	0.07284	0	0.07317	0	1e-05	8e-05	0	0.04005	1e-05	0.02359	0.03049	0.00092	0.06856	0	0.0219	0	0.128649	m	C48-Cd4-H56-N4-O24	0.0176383	0.13722	['[OH2][Cd][OH2]']	['[O-]C(=O)c1cc(cc(c1)C(C)(C)C)C(=O)[O-]', '[O-]C(=O)c1cccnc1']	136	1.85847	Polar	equal	Converged
RIBNUO_FSR	['12']	[30]	[2]	[2, 2]	[30 30]	vasp	[2.203]	2e-05	3e-05	1e-05	0.08542	0	0.05676	0.03783	-0.04338	0.07552	0	-0.00604	0	-5e-05	-5e-05	-1e-05	0.04796	-1e-05	0.06476	0.128588	2	C34-H38-N6-O8-Zn2	0.192189	0.159536	['[Zn]']	['[O-]C(=O)CCC(C(=O)[O-])(C)C', 'n1ccc(cc1)Nc1ccncc1']	88	1.5062	Polar	equal	Converged
KAVYEN_FSR	['5', '12']	[23, 30]	[5, 2]	[5, 5, 5, 5, 5, 5, 5, 5, 2, 2, 2, 2]	[23 23 23 23 23 23 23 23 30 30 30 30]	vasp	[3.754, 2.218]	0.07909	-0.00868	0.04284	0	0.01212	0	7e-05	9e-05	4e-05	-0.06104	-6e-05	-0.058	0.07353	-0.07911	-0.03519	0	0.01711	0	0.128456	m	C40-H56-N16-O24-V8-Zn4	0.174829	0.280598	['[O]', '[V]', '[Zn]']	['C(Cn1cncc1)CCn1cncc1']	148	1.89216	Polar	equal	Converged
KENJUK_FSR	['12']	[30]	[2]	[2, 2, 2, 2]	[30 30 30 30]	vasp	[2.166]	0.03605	0.10992	0.04218	0	0.00883	0	1e-05	-2e-05	-1e-05	0.01821	-6e-05	0.04576	0.01889	0.04699	-0.06839	0	0.01522	0	0.127759	m	C20-H8-N40-Zn4	0.0293382	0.134317	['[Zn]']	['N1=NN=C([N]1)c1[nH]cnc1C1=NN=N[N]1', 'N1=NN=C([N]1)c1nc[nH]c1C1=N[N]N=N1']	72	1.5766	Polar	equal	Converged
TEJSAE_FSR	['12']	[48]	[2]	[2, 2]	[48 48]	vasp	[2.643]	1e-05	-1e-05	1e-05	0.02098	-1e-05	-0.06132	-0.00437	-0.12629	0.00457	0	-0.01317	0	-3e-05	1e-05	-3e-05	0.04845	1e-05	-0.02904	0.127132	2	Cd2-H12-C18-S2-O8	0.156223	0.271217	['[Cd]']	['[O-]C(=O)CSc1ccc(cc1)C(=O)[O-]']	42	2.26682	Polar	equal	Converged
OGOVUC_FSR	['12']	[30]	[2]	[2, 2]	[30 30]	vasp	[2.225]	0.0584	0.04211	0.01353	0	0.00019	0	0.0002	0.0003	-7e-05	0.00834	0.00038	0.00261	0.09465	0.04289	0.00526	0	0.01113	0	0.126783	m	C58-H40-N4-O8-Zn2	0.0316323	0.142907	['[Zn]']	['[O-]C(=O)c1ccc2-c3c(C(c2c1)(C)C)cc(cc3)C(=O)[O-]']	112	1.41705	Polar	equal	Converged
RAVLUX_FSR	['12']	[48]	[2]	[2, 2]	[48 48]	vasp	[2.598]	0.03491	-0.00316	0.03277	0	-0.02958	0	-0.00068	0.00211	0.00165	-0.00616	-0.00136	0.03011	-0.04166	-0.02447	-0.1082	0	0.00376	0	0.126613	m	C38-Cd2-H42-N4-O12-P2	0.0206068	0.143069	['[OH2][Cd][OH2]']	['[O-]C(=O)CCP(=O)(c1ccccc1)[O]', 'n1ccc(cc1)c1ccncc1']	100	1.74962	Polar	equal	Converged
KOPBIC_FSR	['2']	[20]	[2]	[2, 2]	[20 20]	vasp	[2.405]	0.01194	-0.02111	-0.0259	0	0.00305	0	1e-05	2e-05	5e-05	0.00339	1e-05	0.01252	0.0066	0.11479	0.04165	0	-0.01542	0	0.126529	m	Ca2-H12-C12-N4-Cl4-O2	0.0613093	0.0944791	['[Ca]']	['NC(=O)c1cccnc1']	36	1.62985	Polar	equal	Converged
OWOSUQ_FSR	['1']	[11]	[1]	[1, 1]	[11 11]	vasp	[1.146]	0	0	0	-0.02782	0	0.01418	0.00669	-0.00497	0.03523	0	-0.04897	0	0	0	0	0.11073	0	-0.05036	0.125581	2	Na2-H40-C26-S2-N2-O20	0.0416027	0.0852275			92	1.65749	Polar	equal	Converged
AMUDUJ_FSR	['9']	[27]	[2]	[2, 2]	[27 27]	vasp	[2.088]	-0.00013	0	0.00043	-0.03228	0.00019	0.02391	0.00561	0.05084	-0.00191	0	-0.02727	0	-0.00011	-0.00012	0.00111	0.09188	0.00043	-0.07548	0.1255	2	C32-Cl2-Co2-H26-O14	0.11157	0.213353	['[OH2][Co]']	['CC(C(=O)[O-])Oc1ccc(cc1)Oc1ccc(cc1Cl)C(=O)[O-]']	76	1.63396	Polar	equal	Converged
QARBUI_FSR	['12']	[30]	[2]	[2, 2]	[30 30]	vasp	[2.279]	1e-05	0	0	-0.02868	-1e-05	-0.07048	-0.07025	-0.10256	-0.0057	0	-0.01424	0	-1e-05	0	-1e-05	-0.03546	1e-05	-0.01892	0.125255	2	Zn2-H24-C34-N24-O2	0.0464977	0.157076	['[Zn]']	['c1ccc(nc1)c1nc(C2=NN=N[N]2)c(nc1c1ccccn1)C1=NN=N[N]1']	86	1.66818	Polar	equal	Converged
QUMGAI_FSR	['2']	[56]	[2]	[2, 2, 2, 2]	[56 56 56 56]	vasp	[2.713]	4e-05	7e-05	5e-05	0.03269	0	0	0	0	0	0	-0.0385	0	0	0	0	0	0	0.12523	0.12523	222	Ba4-H32-C24-O32	0.10345	0.07977			92	2.73693	Non-polar	equal	Converged
EBOMIT_FSR	['12']	[30]	[2]	[2, 2]	[30 30]	vasp	[2.06]	1e-05	0	0	0.02016	0	-0.08673	0.06009	-0.06838	-0.0841	0	0.01713	0	0	0	0	-0.02872	0	0.02963	0.125111	2	Zn2-H22-C22-N2-O10	0.131621	0.250774	['[Zn]']	['OCC(C(=O)[O-])NCc1ccc(cc1)C(=O)[O-]']	58	1.75166	Polar	equal	Converged
UGENAX_FSR	['12']	[30]	[2]	[2, 2]	[30 30]	vasp	[2.134]	0.027	0.05922	0.01141	0	0.04118	0	1e-05	3e-05	4e-05	0.02858	1e-05	-0.04624	0.01784	-0.08991	0.03658	0	-0.04287	0	0.124889	m	Zn2-H24-C32-N20-O8	0.0736618	0.117945	['[Zn]']	['O=N(=O)c1ccc(cc1)CC1=NN=N[N]1']	86	1.6971	Polar	equal	Converged
WIVBUB_FSR	['12']	[48]	[2]	[2, 2, 2]	[48 48 48]	vasp	[2.392]	0.08819	-0.08796	-9e-05	0.00864	0	0	0.00012	-0.00016	1e-05	3e-05	-0.00846	-0.08868	-1e-05	-1e-05	-1e-05	0	0	0	0.124857	32	Cd3-H60-C54-N12-O21	0.03148	0.0933787	['[OH2][Cd]']	['CC(C(=O)[O-])NC(=O)c1ccncc1']	150	1.43479	Non-polar	equal	Converged
HESKEY_FSR	['2']	[20]	[2]	[2, 2]	[20 20]	vasp	[2.362]	0.0001	-8e-05	-5e-05	0	-0.0503	0	0	-1e-05	0	0.05945	0	0	0.0414	0.01364	0.117	0	0	0	0.124856	mm2	C18-Ca2-H32-O24	0.162944	0.176295	['[OH2][Ca]([OH2])([OH2])[OH2]']	['[O-]C(=O)C1CC(C(C1C(=O)O)C(=O)O)C(=O)[O-]']	76	1.73802	Polar	equal	Converged
BENKOW_FSR	['12']	[30]	[2]	[2, 2, 2, 2]	[30 30 30 30]	vasp	[2.113]	0	0	0	0	0.03057	0	0	0	0	0.124	0	0	-0.00819	0.07411	-0.07428	0	0	0	0.124	mm2	Zn4-P4-H16-C8-N12-O16	0.228434	0.205956	['[Zn]']	['[O]P(=O)(O)[O]']	60	2.37787	Polar	equal	Converged
LOZXIJ_FSR	['12']	[30]	[2]	[2, 2]	[30 30]	vasp	[2.381]	-4e-05	2e-05	0.00015	-0.0289	2e-05	0.03644	0.0867	0.08484	-0.02343	0	-0.00677	0	0.00012	-9e-05	-0.0001	0.08704	-0.00012	-0.02241	0.123732	2	Zn2-H20-C24-O10	0.267345	0.376986	['[OH2][Zn]']	['[O-]C(=O)C=Cc1cccc(c1)C=CC(=O)[O-]']	56	1.79473	Polar	equal	Converged
OZEPIT_FSR	['7']	[25]	[2]	[2, 2]	[25 25]	vasp	[2.291]	0.0027	0.00052	0.00221	0.01995	0.00127	-0.01229	0.09561	-0.01726	-0.00647	0	0.07621	0	0.00025	-2e-05	0.00041	-0.0052	-0.00011	0.00977	0.123679	2	C46-F12-H30-Mn2-N2-O8	0.0787084	0.0983688	['[Mn]']	['[O-]C(=O)c1ccc(cc1)C(C(F)(F)F)(C(F)(F)F)c1ccc(cc1)C(=O)[O-]']	100	1.47184	Polar	equal	Converged
FEZMUT_FSR	['1']	[19]	[1]	[1, 1]	[19 19]	vasp	[1.222]	0.10425	-0.00246	-0.02667	0	-0.02142	0	0	0	0	0.00533	0	0.00019	0.05753	-0.03653	-0.00452	0	0.02225	0	0.123643	m	K2-H50-C26-N4-O16	0.193096	0.127923	['[K]']	['[O][N]C=N[O]']	98	1.40628	Polar	equal	Converged
FITDEU_FSR	['12']	[30]	[2]	[2, 2]	[30 30]	vasp	[1.994]	1e-05	1e-05	0	-0.03272	0	0.01113	-0.09382	-0.03425	-0.07155	0	-0.00605	0	0	-1e-05	-1e-05	-0.01564	0	0.01581	0.123009	2	Zn2-H38-C30-N10-O12	0.105748	0.174104			92	1.54438	Polar	equal	Converged
TILZUM_FSR	['11']	[29]	[1]	[1, 1, 1, 1]	[29 29 29 29]	vasp	[0.639]	-3e-05	-6e-05	0	0.01008	-5e-05	0.00835	0.10387	0.03911	0.04839	0	-0.02122	0	-0.00019	0.00018	0.00018	0.01763	0.00016	-0.04422	0.122925	2	Cu4-H20-C22-Se2-I4-N4	0.0979875	0.166866	['[Cu][Cu](I)I']	['c1ccc(nc1)[Se]Cc1ccccn1']	56	2.9224	Polar	equal	Converged
NUVBIR_FSR	['11']	[29]	[2]	[2, 2]	[29 29]	vasp	[1.205]	1e-05	0	4e-05	-0.00933	3e-05	-0.02135	-0.09727	-0.0119	-0.06983	0	-0.02301	0	1e-05	1e-05	2e-05	-0.02942	2e-05	-0.0002	0.12251	2	Cu2-H40-C48-N8-O12	0.0272357	0.127546			110	1.65036	Polar	equal	Converged
ASUQIO04_FSR	['11']	[29]	[1]	[1, 1, 1, 1, 1, 1]	[29 29 29 29 29 29]	vasp	[0.535]	-2e-05	-1e-05	-5e-05	0	-0.01091	0	-1e-05	-2e-05	1e-05	-0.02272	0	0	0.00746	0.10886	0.05538	0	0	0	0.122365	mm2	C24-Cu6-H36-N18	0.111093	0.222911	['[Cu]']	['CC1=NN=C([N]1)C']	84	2.04783	Polar	equal	Converged
XEGGEW_FSR	['9']	[27]	[2]	[2, 2]	[27 27]	vasp	[1.564]	3e-05	1e-05	0	-0.0352	-2e-05	-0.04645	-0.06856	-0.08544	-0.05431	0	-0.00187	0	7e-05	2e-05	-7e-05	0.01608	2e-05	0.04281	0.122285	2	Co2-H28-C28-N8-Cl4	0.0845827	0.146074	['Cl[Co]Cl']	['c1cc(cc(c1)Cn1[n-]ccc1)Cn1[n-]ccc1']	70	1.65993	Polar	equal	Converged
UTEYOI_FSR	['9']	[27]	[2]	[2, 2]	[27 27]	vasp	[1.894]	0.0001	0.001	0.00141	0.01394	0.00033	-0.07897	-0.1126	-0.03329	0.02207	0.00073	0.02423	-0.00273	0.00112	-0.00336	-0.00103	0.03193	-0.00082	0.0367	0.121976	2	Br2-C34-Co2-H30-N8-O8	0.0665627	0.110651	['[Co]']	['Brc1cc(cc(c1)C(=O)[O-])C(=O)[O-]', 'C(Cn1cncc1)Cn1cncc1']	84	1.80281	Polar	equal	Converged
MCYSZN_FSR	['12']	[30]	[2]	[2, 2]	[30 30]	vasp	[2.046]	0	0	0	0.01339	0	-0.05824	0.05655	-0.06306	-0.00244	0	-0.0202	0	4e-05	-1e-05	1e-05	-0.07267	4e-05	-0.0894	0.121905	2	Zn2-H32-C16-S4-N4-O8	0.0923331	0.0932117	['[Zn]']	['[O-]C(=O)C(CSC)N']	66	1.73604	Polar	equal	Converged
HEDNOT_FSR	['12']	[30]	[2]	[2, 2, 2, 2]	[30 30 30 30]	vasp	[2.049]	-2e-05	-1e-05	1e-05	0	-0.08169	0	6e-05	-4e-05	-1e-05	-0.00599	0	0	-0.11203	0.0229	-0.04175	0	0	0	0.12173	mm2	Zn4-H24-C14-O14	0.130686	0.157246	['[Zn]']	['C[O]', '[O-]C(=O)C']	56	1.95883	Polar	equal	Converged
DENTAS_FSR	['9']	[27]	[2]	[2]	[27]	vasp	[1.621]	0	0	0	0	-0.00714	0	5e-05	5e-05	1e-05	-0.09934	0	0	-0.04684	-0.03836	-0.1053	0	0	0	0.121464	mm2	C13-Cl2-Co1-H14-N2	0.155668	0.148827	['Cl[Co]Cl']	['Nc1ccc(cc1)Cc1ccc(cc1)N']	32	1.71553	Polar	equal	Converged
GELVID_FSR	['10']	[28]	[2]	[2, 2, 2]	[28 28 28]	vasp	[2.071]	-0.05366	0.05377	0	0.09475	0	0	0.00016	-6e-05	-1e-05	-0.0002	-0.09484	0.05386	0	0	0	0	0	0	0.121443	32	Ni3-H12-C21-O15	0.0664004	0.183677	['[Ni]']	['[O-]C(=O)c1cc(O)c(c(c1)O)[O]']	51	1.59021	Non-polar	equal	Converged
RIWVAV_FSR	['9']	[27]	[2]	[2, 2]	[27 27]	vasp	[1.876]	0.07708	-0.01466	0.04552	0	-0.00763	0	3e-05	4e-05	-8e-05	-0.01053	1e-05	-0.02813	-0.05567	-0.01053	-0.06148	0	0.00375	0	0.12099	m	C44-Co2-H36-N8-O8	0.0555368	0.111092	['[Co]']	['[O-]C(=O)c1ccccc1C(=O)[O-]', 'c1ncn(c1)Cc1ccc(cc1)Cn1cncc1']	98	1.54522	Polar	equal	Converged
LIXROZ_FSR	['11']	[29]	[1]	[1, 1, 1, 1]	[29 29 29 29]	vasp	[0.785]	1e-05	0	1e-05	0	0.02114	0	0	-1e-05	0	0.05488	0	0	-0.04266	0.01586	0.11184	0	0	0	0.120746	mm2	Cu4-H16-C24-S20-I4-O4	0.02689	0.104147			72	2.59161	Polar	equal	Converged
JOJGOG_FSR	['12']	[48]	[2]	[2, 2, 2, 2]	[48 48 48 48]	vasp	[2.566]	-5e-05	0.00024	-2e-05	0	0.04153	0	0	2e-05	1e-05	-0.11081	0	0	-0.04502	-0.07626	-0.08144	0	0	0	0.120312	mm2	Cd4-H32-C56-N8-O36	0.0631406	0.123779	['[OH2][Cd]']	['OC(=O)c1ccc(nc1c1nc(ccc1C(=O)O)C(=O)[O-])C(=O)[O-]']	136	2.20168	Polar	equal	Converged
NENMAV_FSR	['14']	[50]	[4]	[4, 4]	[50 50]	vasp	[2.984]	0.01122	0.00812	0.00631	0	-0.01616	0	-1e-05	0	0	-0.00566	0	-0.00924	-0.01534	-0.07811	-0.05512	0	0.06815	0	0.119939	m	C32-Cl2-H34-O4-Sn2	0.0615184	0.109904	['[Sn]']	['[O-]C(=O)CCl']	74	1.62339	Polar	equal	Converged
CINCEI_FSR	['1']	[3]	[1]	[1, 1, 1]	[3 3 3]	vasp	[1.365]	-0.0816	0.08358	-4e-05	0.02455	0	0	-0.00303	0.00394	-0.00014	-0.00273	-0.0243	0.08197	4e-05	4e-05	-0.00012	0	0	0	0.119517	32	Li3-H9-C21-N6-O18	0.179118	0.29327	['[Li]']	['[O-]C(=O)c1cc(cc(c1)N(=O)=O)N(=O)=O']	57	1.80491	Non-polar	equal	Converged
HAZPEF_FSR	['12']	[48]	[2]	[2]	[48]	vasp	[2.434]	4e-05	3e-05	-1e-05	0.01354	1e-05	0.06195	0.10447	0.05142	-0.02335	0	0.01137	0	1e-05	1e-05	5e-05	0.02063	1e-05	0.06294	0.1193	2	Br2-C12-Cd1-H6-N2-O4	0.0986559	0.19714	['[Cd]']	['[O-]C(=O)c1cc(Br)cnc1']	27	1.76016	Polar	equal	Converged
DOPKOK_FSR	['11']	[29]	[2]	[2, 2]	[29 29]	vasp	[1.6]	2e-05	2e-05	-1e-05	0.01618	2e-05	0.0327	-0.00129	0.11581	-0.01584	0	0.02303	0	1e-05	0	0	-0.0119	0	0.02375	0.119142	2	Cu2-H28-C32-N20-O10	0.0167724	0.116686	['[OH2][Cu]']	['[O-]C(=O)CN1[N]N=C([N]1)c1cccnc1', '[O-]C(=O)Cn1nnc(n1)c1cccnc1']	92	1.66655	Polar	equal	Converged
IMEXAB_FSR	['12']	[30]	[2]	[2, 2, 2, 2]	[30 30 30 30]	vasp	[2.406]	-0.02807	0.05144	0.05146	0	-0.02076	0	0.00012	-0.0003	4e-05	-0.01223	-6e-05	-0.06187	-0.05436	0.07346	0.02063	0	0.00042	0	0.118755	m	C50-H46-N10-O26-Zn4	0.0272079	0.143478	['[OH2][Zn][OH2]']	['O=C(c1cccnc1)Nc1cccnc1', '[O-]C(=O)c1ccnc(c1)C(=O)[O-]']	136	1.55806	Polar	equal	Converged
KEKXAB_FSR	['12']	[30]	[2]	[2, 2]	[30 30]	vasp	[2.1]	-1e-05	0	1e-05	-0.07103	0	-0.01938	-0.04193	0.03143	0.04698	0	-0.02833	0	0	0	0	0.09064	0	0.021	0.118627	2	Zn2-H38-C24-N4-Cl2-O6	0.0595153	0.112063	['Cl[Zn]']	['ON=C1CC2C(CC1(C)NCC(=O)[O-])C2(C)C']	76	1.71272	Polar	equal	Converged
IXUXAC_FSR	['1']	[3]	[1]	[1, 1, 1, 1, 1, 1, 1, 1]	[3 3 3 3 3 3 3 3]	vasp	[1.165]	0.00021	0.00016	0.00029	0	-0.05593	0	-7e-05	-0.00015	-0.0001	0.11817	0	0	-0.04591	0.04717	0.04794	0	0	0	0.11817	mm2	C24-H16-Li8-N8-O16	0.124098	0.2067	['[Li]']	['[O-]C(=O)c1n(C)cnc1C(=O)[O-]']	72	1.58917	Polar	equal	Converged
QARCAP_FSR	['12']	[30]	[2]	[2, 2, 2, 2]	[30 30 30 30]	vasp	[2.442]	0	0	0	0.11752	0	0	0	0	1e-05	0	0.06136	0	0	0	2e-05	0	0	-0.00645	0.11752	222	Zn4-H32-C64-N48	0.02657	0.14409	['[Zn]']	['c1ccc(nc1)c1nc(C2=NN=N[N]2)c(nc1c1ccccn1)C1=NN=N[N]1']	148	1.76278	Non-polar	equal	Converged
CUGROM_FSR	['2']	[20]	[2]	[2, 2]	[20 20]	vasp	[2.609]	5e-05	-0.00011	-2e-05	0.03753	0	0	2e-05	4e-05	-1e-05	0	0.1084	0	0	0	0	0	0	-0.11746	0.11746	222	C8-Ca2-H8-O12	0.11615	0.1889			30	2.26804	Non-polar	equal	Converged
AXUFAB_FSR	['12']	[80]	[2]	[2, 2, 2, 2]	[80 80 80 80]	vasp	[1.389]	0.04684	0.04409	0.04064	0	0.03493	0	-1e-05	-1e-05	-5e-05	0.03683	-3e-05	0.03019	0.02289	0.01517	0.01799	0	0.08953	0	0.117248	m	C28-Cl4-F8-H16-Hg4-O4	0.0432188	0.148352			64	3.04933	Polar	equal	Converged
COMALT01_FSR	['9']	[27]	[2]	[2, 2]	[27 27]	vasp	[2.109]	-0.0002	6e-05	-0.00017	-0.08618	-3e-05	0.03198	0.05611	0.03023	0.07049	0	-0.02766	0	-6e-05	-6e-05	3e-05	0.02817	-3e-05	-0.08788	0.117138	2	Co2-H16-C8-O14	0.117653	0.122553	['[OH2][Co][OH2]']	['[O-]C(=O)CC(C(=O)[O-])O']	40	1.93487	Polar	equal	Converged
RIWSOG_FSR	['12']	[30]	[2]	[2, 2]	[30 30]	vasp	[2.258]	-0.03455	0.00275	-0.06276	-0.01152	0.017	-0.01776	-0.00052	0.01615	0.07473	0.03205	-0.04223	-0.04319	0.02942	-0.01926	-0.01925	0.01316	-0.02166	-0.00938	0.116901	1	Zn2-H30-C22-N2-O16	0.0642679	0.148879	['[OH2][Zn]([OH2])[OH2]']	['CC(C(=O)[O-])NC(=O)c1ccc(cc1)C(=O)[O-]']	72	1.63065	Polar	equal	Converged
NUZZEN_FSR	['1', '11']	[19, 29]	[1, 2]	[1, 1, 2]	[19 19 29]	vasp	[1.34, 1.145]	0.08535	0.02094	0.00229	0.00141	0.00061	-0.01973	0.02839	0.04186	-0.01435	-0.07333	-0.03265	-0.02356	0.05622	-0.00184	-0.05706	0.04916	-0.01121	0.03008	0.116823	1	K2-Cu1-H47-C35-N7-O9	0.0520323	0.133605			101	1.44613	Polar	equal	Converged
KOMMII_FSR	['12']	[30]	[2]	[2, 2]	[30 30]	vasp	[2.118]	-0.00244	-0.02783	0.02416	0	0.00837	0	5e-05	-2e-05	-1e-05	0.01599	0	-0.00405	0.00073	-0.01516	0.10884	0	0.02635	0	0.116818	m	Zn2-H60-C32-O8	0.0965967	0.209651	['[Zn]']	['CCCCCCCC(=O)[O-]']	102	1.31238	Polar	equal	Converged
HEYQIO_FSR	['1']	[11]	[1]	[1, 1]	[11 11]	vasp	[1.143]	-2e-05	-5e-05	-7e-05	0.03307	-2e-05	0.02342	0.05768	0.08487	-0.0014	0	-0.05578	0	2e-05	0	2e-05	0.0591	-4e-05	-0.02793	0.116804	2	Na2-H32-C26-S2-N2-O8	0.0796516	0.0946858	['[Na]']	['CSCCC(C(=O)[O-])[NH]=Cc1cccc(c1[O])OC']	72	1.35769	Polar	equal	Converged
MUCKIF_FSR	['12']	[30]	[2]	[2, 2, 2, 2]	[30 30 30 30]	vasp	[1.954]	1e-05	0	2e-05	0.03646	2e-05	-0.01718	0.00223	-0.08057	0.08431	0	0.00022	0	2e-05	-6e-05	-4e-05	0.0366	4e-05	-0.01402	0.116639	2	Zn4-P4-H64-C40-N4-Cl8-O12	0.107038	0.071678	['Cl[Zn]Cl']	['CCOP(=O)(Cc1cccnc1)OCC']	136	1.61414	Polar	equal	Converged
BESQEX_FSR	['12']	[48]	[2]	[2, 2]	[48 48]	vasp	[2.587]	-1e-05	1e-05	2e-05	0.02796	6e-05	-0.00609	0.06073	0.06504	0.07533	0	0.00209	0	-0.0001	4e-05	-2e-05	-0.00864	4e-05	0.04371	0.116608	2	Cd2-H12-C16-S2-N6-Cl2-O6	0.0644433	0.135091	['Cl[Cd]']	['[O]S(c1ccc(cc1)n1cnnc1)([O])[O]']	46	2.31094	Polar	equal	Converged
CAGLIS11_FSR	['2']	[20]	[2]	[2, 2]	[20 20]	vasp	[2.487]	-1e-05	0	0	0.02873	0	0	0	0	0	0	-0.00885	0	-7e-05	-3e-05	-2e-05	0	0	0.11655	0.11655	222	Ca2-H44-C24-O24	0.0306	0.12809			94	1.75016	Non-polar	equal	Converged
OBOGUK_FSR	['12']	[30]	[2]	[2, 2, 2, 2, 2, 2]	[30 30 30 30 30 30]	vasp	[2.09]	0	0	0	0	-0.0356	0	5e-05	7e-05	6e-05	0.05262	0	0	-0.0317	-0.11179	-0.00119	0	0	0	0.116204	mm2	Zn6-H32-C46-O32	0.029428	0.111986	['[Zn][OH]([Zn]([OH2])([OH2])[OH2])[Zn]']	['[O-]C(=O)c1cc(cc(c1)Oc1cc(cc(c1)C(=O)[O-])C(=O)[O-])Oc1cc(cc(c1)C(=O)[O-])C(=O)[O-]']	116	0.82515	Polar	equal	Converged
JERYUA_FSR	['14']	[50]	[4]	[4, 4, 4, 4, 4, 4]	[50 50 50 50 50 50]	vasp	[2.855]	1e-05	0	1e-05	0.01764	0.0403	0	1e-05	-1e-05	0	0.04031	-0.01762	1e-05	0.06133	0.06133	0.07701	0	0	0	0.115988	6	Sn6-H72-C48-S6-O12	0.0671766	0.119874	['[Sn]']	['[O-]C(=O)c1cccs1']	144	1.81922	Polar	equal	Converged
EDEXER_FSR	['2']	[56]	[2]	[2, 2]	[56 56]	vasp	[2.777]	0.00928	-0.01446	0.00445	0	0.00254	0	0.00017	-9e-05	-8e-05	-0.00394	0.00013	-0.01391	-0.09122	0.02704	0.03605	0	-0.05437	0	0.115848	m	Ba2-C40-H56-O20	0.0359149	0.142495	['[Ba]']	['CC(=C)C(=O)[O-]']	118	1.55235	Polar	equal	Converged
DALVAQ_FSR	['12']	[48]	[2]	[2, 2, 2, 2]	[48 48 48 48]	vasp	[2.63]	-0.00052	-0.00075	2e-05	0	0.08595	0	0	0	0	0.01108	0	0	0.10185	0.00127	0.05445	0	0	0	0.1155	mm2	Cd4-H40-C48-N8-O20	0.0500535	0.104283	['[Cd]']	['N#Cc1cc(cc(c1)C(=O)[O-])C(=O)[O-]']	120	1.95579	Polar	equal	Converged
NAPTUU_FSR	['12']	[48]	[2]	[2, 2]	[48 48]	vasp	[2.047]	0.00011	0.00013	0	0	0.04822	0	3e-05	3e-05	0	-0.11533	0	0	-0.03208	-0.05403	-0.08073	0	0	0	0.11533	mm2	Br4-C16-Cd2-H20-N8	0.0744728	0.11227	['Br[Cd]Br']	['Cn1ccnc1c1nccn1C']	50	2.42268	Polar	equal	Converged
JEJZAC_FSR	['7']	[25]	[2]	[2, 2, 2, 2]	[25 25 25 25]	vasp	[2.624]	6e-05	-1e-05	3e-05	0	0.01428	0	1e-05	3e-05	-3e-05	-0.00085	0	0	-0.00673	-0.09424	-0.06613	0	0	0	0.115324	mm2	Mn4-H64-C92-O32	0.0630544	0.111009	['[Mn]']	['[O-]C(=O)c1cc(OCc2ccc(cc2)C(=O)[O-])cc(c1)OCc1ccc(cc1)C(=O)O']	192	1.47886	Polar	equal	Converged
WESRIW_FSR	['11']	[29]	[1]	[1, 1, 1, 1]	[29 29 29 29]	vasp	[0.72]	-8e-05	8e-05	-6e-05	0.11509	0	0	0	0	0	0	0.07687	0	1e-05	-1e-05	0	0	0	0.0686	0.11509	222	Cu4-H40-C32-N8-Cl4-O4	0.02205	0.0930401			92	1.80914	Non-polar	equal	Converged
ACOVEU_FSR	['9']	[27]	[2]	[2, 2]	[27 27]	vasp	[2.404]	-2e-05	-3e-05	1e-05	0.11489	0	0	-0.00019	-0.00014	-0.00019	0	0.05576	0	-4e-05	-6e-05	2e-05	0	0	-0.01572	0.11489	222	C8-Co2-H8-O12	0.14397	0.0903			30	2.60042	Non-polar	equal	Converged
ALIFOR01_FSR	['11']	[29]	[1]	[1, 1, 1, 1]	[29 29 29 29]	vasp	[0.642]	2e-05	-2e-05	-3e-05	0.00837	-1e-05	0.03471	0.02939	-0.07844	-0.05683	0	-0.05432	0	0	0	1e-05	0.01842	0	0.03157	0.114878	2	Cu4-H40-C24-N4-Cl4-O2	0.0535635	0.145575			78	1.79056	Polar	equal	Converged
FEYDAP_FSR	['12']	[80]	[2]	[2, 2, 2, 2, 2, 2, 2, 2]	[80 80 80 80 80 80 80 80]	vasp	[2.359]	-6e-05	1e-05	-1e-05	0	-0.10229	0	2e-05	-1e-05	3e-05	0.02003	0	0	-0.07288	0.07298	0.05056	0	0	0	0.114865	mm2	Hg8-H48-C48-S4-N8-Cl16	0.02361	0.1259			132	2.88797	Polar	equal	Converged
JAGNEN_FSR	['12']	[48]	[2]	[2, 2, 2, 2]	[48 48 48 48]	vasp	[2.677]	-0.02013	-0.03245	0.00585	-0.01823	0.01067	-0.05552	-0.04487	-0.00244	0.00462	0.00213	0.02286	-0.02049	-0.04303	0.02087	-0.09782	-0.00786	0.01675	-0.01383	0.114069	1	Cd4-H40-C44-N4-O20	0.0533908	0.130113	['[Cd]']	['[O-]C(=O)c1c(cccc1C(=O)[O-])c1cc(cc(c1)C(=O)[O-])C(=O)[O-]']	112	1.96582	Polar	equal	Converged
FELXEA_FSR	['12']	[30]	[2]	[2, 2, 2, 2]	[30 30 30 30]	vasp	[1.818]	0	1e-05	1e-05	-0.11406	0	0	0	0	0	0	-0.0833	0	0	0	-1e-05	0	0	0.01343	0.11406	222	Zn4-H48-C24-S8-N16-O16	0.12287	0.08794	['[Zn]']	['[O-]C(=O)CCC(=O)[O-]']	116	1.79735	Non-polar	equal	Converged
EMOTAC_FSR	['10']	[28]	[2]	[2, 2]	[28 28]	vasp	[1.782]	6e-05	0.00014	-7e-05	-0.02894	0	-0.00312	-0.02632	-0.10727	-0.02753	0	-0.00556	0	-1e-05	6e-05	-6e-05	-0.02472	2e-05	-0.03604	0.113967	2	Ni2-H24-C20-N4-O10	0.0602681	0.137364			60	1.52602	Polar	equal	Converged
WOFBAV_FSR	['1']	[11]	[1]	[1, 1, 1, 1, 1, 1]	[11 11 11 11 11 11]	vasp	[1.062]	-3e-05	1e-05	-1e-05	-3e-05	-0.00898	0.04701	0.04695	-0.04714	-0.00015	-0.00882	0	0	-0.05908	-0.05908	-0.07709	0	0	0	0.113683	3m	C12-H24-N14-Na6-O18	0.188255	0.250298	['[Na]']	['[O]N(=O)=O']	74	1.73925	Polar	equal	Converged
GOJDUG_FSR	['1']	[19]	[1]	[1, 1, 1, 1]	[19 19 19 19]	vasp	[1.409]	-2e-05	-7e-05	0.00018	-0.00271	0	0	0	-1e-05	1e-05	0	0.11364	0	0	0	0	0	0	0.03823	0.11364	222	K4-H16-C24-S4-N12-O12	0.009	0.10779	['[K]']	['[N]=[N]=Nc1ccc(cc1)S([O])([O])[O]']	72	1.81774	Non-polar	equal	Converged
KIYMAI01_FSR	['2']	[38]	[2]	[2, 2, 2, 2]	[38 38 38 38]	vasp	[2.829]	-2e-05	6e-05	0	0.11306	0	0	0	1e-05	1e-05	0	-0.00538	0	-4e-05	-0.0002	-0.0001	0	0	-0.01514	0.11306	222	Sr4-H52-C60-N4-O20	0.00896	0.11474	['[Sr]']	['[O-]C(=O)c1ccc(c2c1cccc2)C(=O)[O-]']	140	1.66852	Non-polar	equal	Converged
MERFAT_FSR	['12']	[48]	[2]	[2, 2, 2, 2]	[48 48 48 48]	vasp	[2.473]	0.00018	3e-05	0.0001	-0.03655	0	0	0	0	0	0	0.11287	0	0	0	0	0	0	0.02844	0.11287	222	Cd4-H28-C24-N12-O20	0.0773	0.19017	['[OH2][Cd]']	['[O-]C(=O)CCN1[CH]N=C([N]1)C(=O)[O-]', '[O-]C(=O)CCn1cnc(n1)C(=O)[O-]']	88	2.36348	Non-polar	equal	Converged
PAJFEL_FSR	['1']	[11]	[1]	[1, 1]	[11 11]	vasp	[1.233]	-1e-05	6e-05	-1e-05	-0.01237	-1e-05	-0.10591	-0.03512	-0.04886	-0.07746	0	-0.05028	0	-4e-05	6e-05	0	-0.07925	5e-05	0.03447	0.112811	2	C20-H26-N4-Na2-O12	0.068427	0.147185	['[Na]']	['O=C1CCC(N1)C(=O)[O-].O=C1CCC(N1)C(=O)O']	64	1.59323	Polar	equal	Converged
JUKXIW01_FSR	['12']	[48]	[2]	[2, 2]	[48 48]	vasp	[2.564]	0.10533	-0.03091	0.00633	0	-0.02423	0	0.00016	0.00019	0.00026	-0.01914	9e-05	-0.007	-0.01078	-0.03423	0.00122	0	0.01131	0	0.112639	m	C32-Cd2-H24-N4-O8	0.0665906	0.165819	['[Cd]']	['[O-]C(=O)C=Cc1ccncc1']	70	1.55369	Polar	equal	Converged
CUICOL10_FSR	['11']	[29]	[1]	[1, 1]	[29 29]	vasp	[0.638]	0	0	0	0	0.03747	0	-3e-05	1e-05	3e-05	-0.10544	0	0	0.00193	-0.02817	-0.10901	0	0	0	0.112608	mm2	Cu2-H22-C16-I2-N2	0.076477	0.14668			44	2.17874	Polar	equal	Converged
FICNEK01_FSR	['1', '14']	[11, 82]	[1, 2]	[1, 1, 1, 1, 2, 2, 2, 2]	[11 11 11 11 82 82 82 82]	vasp	[1.223, 3.156]	-0.00047	0.00022	0.00033	-0.1125	0	0	0.0007	-0.00063	-0.00011	0	-0.11231	0	0.00026	0.00032	-0.00049	0	0	-0.11252	0.112522	23	Na4-H24-Pb4-C24-N4-O24	0.0255	0.0870224	['[Na]']	['O=C1C[N]23[Pb](O1)(OC(=O)C3)OC(=O)C2']	84	2.92337	Non-polar	equal	Converged
MUYGOE_FSR	['12']	[30]	[2]	[2]	[30]	vasp	[2.108]	6e-05	4e-05	0.0002	-0.04153	5e-05	-0.02473	0.00069	0.07509	0.08378	0	-0.00106	0	2e-05	2e-05	5e-05	0.04825	0	-0.0781	0.112513	2	C22-H26-N4-O6-Zn1	0.120098	0.182403			59	1.5754	Polar	equal	Converged
IMACZN01_FSR	['12']	[30]	[2]	[2, 2]	[30 30]	vasp	[1.986]	-1e-05	-4e-05	-5e-05	0.0513	0	0	2e-05	4e-05	3e-05	0	0.11211	0	-1e-05	2e-05	-1e-05	0	0	0.08535	0.11211	222	C16-H24-N4-O16-Zn2	0.08169	0.03042	['[Zn]']	['[O-]C(=O)C[NH2]CC(=O)[O-]']	62	1.41484	Non-polar	equal	Converged
WEHSUZ_FSR	['fblock']	[57]	[3]	[3, 3, 3, 3]	[57 57 57 57]	vasp	[4.429]	-0.07446	-0.01557	0.02543	-6e-05	-0.02078	-0.00013	-3e-05	-0.0013	-0.00109	0.03878	-0.00038	-0.05127	-0.044	0.05647	0.05482	-0.00066	-0.0312	0.00039	0.112093	m	La4-H20-C36-N12-O28	0.104601	0.180747	['[OH2][La]']	['[O-]C(=O)c1ncnc(c1)C(=O)[O-]']	100	2.27565	Polar	equal	Converged
POGZUH_FSR	['12']	[48]	[2]	[2, 2]	[48 48]	vasp	[2.203]	0.07864	-0.0742	-0.00692	0	0.01602	0	0.001	0.00037	8e-05	-0.0461	0.00045	-0.0431	0.03608	0.01005	-0.01535	0	0.01507	0	0.112035	m	C68-Cd2-H44-N8-O8	0.0598841	0.129009	['[Cd]']	['[O-]C(=O)c1ccccc1c1ccccc1C(=O)[O-]']	130	1.54876	Polar	equal	Converged
UGAFIR01_FSR	['10']	[28]	[2]	[2, 2]	[28 28]	vasp	[1.833]	-2e-05	4e-05	-0.00015	-0.06519	-2e-05	0.00348	0.02027	0.0796	0.06261	0	-0.04274	0	3e-05	8e-05	3e-05	0.05861	5e-05	-0.06593	0.111776	2	Ni2-H16-C8-O14	0.107724	0.101604	['[OH2][Ni][OH2]']	['[O-]C(=O)CC(C(=O)[O-])O']	40	1.95399	Polar	equal	Converged
DUGFIW_FSR	['12']	[30]	[2]	[2, 2]	[30 30]	vasp	[2.165]	-1e-05	0	-6e-05	0.01149	-2e-05	-0.01915	-0.02582	0.09548	0.05168	0	-0.00203	0	-1e-05	0	0	0.0284	0	0.00829	0.111616	2	C44-H28-N6-O8-S2-Zn2	0.0802781	0.149521	['[Zn]']	['[O-]C(=O)c1cc(CSc2nc3c([nH]2)cccc3)cc(c1)C(=O)[O-]']	90	1.58267	Polar	equal	Converged
IXIPIQ_FSR	['12']	[80]	[2]	[2, 2, 2, 2]	[80 80 80 80]	vasp	[2.018]	0	4e-05	-3e-05	0	0.0569	0	0	4e-05	2e-05	-0.06285	0	0	0.06984	-0.01706	0.08512	0	0	0	0.111419	mm2	Hg4-H36-C48-Br8-N12	0.07382	0.13667			108	2.74713	Polar	equal	Converged
ODOWAF_FSR	['1']	[3]	[1]	[1, 1]	[3 3]	vasp	[1.228]	-0.0482	0.06767	-0.00873	0	-0.00235	0	-1e-05	-1e-05	-2e-05	0.0052	-1e-05	0.01457	-0.00114	0.07076	-0.04562	0	0.01115	0	0.110976	m	B2-C44-H48-Li2-O16	0.125672	0.11359			112	1.34334	Polar	equal	Converged
QOGFIB_FSR	['12']	[30]	[2]	[2, 2, 2, 2]	[30 30 30 30]	vasp	[1.88]	0	0	0	0	0.00017	0	-1e-05	-3e-05	0	0.01177	0	0	-0.05081	-0.05886	-0.07884	0	0	0	0.110733	mm2	Br8-C8-H32-N8-Zn4	0.0367778	0.1235	['Br[Zn]Br']	['NCCN']	60	2.79173	Polar	equal	Converged
EPOJAV_FSR	['14']	[50]	[4]	[4, 4]	[50 50]	vasp	[2.822]	-0.02253	-0.01858	-0.02718	0.03778	-0.04207	0.01052	0.03641	-0.00494	0.08097	-0.00085	0.03823	0.01473	-0.02302	0.0153	0.02836	0.03851	-0.01584	0.02896	0.110637	1	Sn2-H28-C20-N2-Cl2-O4	0.0396786	0.128165	['[Sn]']	['[O-]C(=O)Cc1ccc(nc1)Cl']	58	1.80557	Polar	equal	Converged
YOLBEI_FSR	['11']	[29]	[2]	[2, 2]	[29 29]	vasp	[0.97]	0.06923	0.05321	-0.01789	0.03565	0.01524	-0.03648	-0.04543	0.00176	0.004	0.01581	0.00706	0.02881	0.01694	0.01306	0.04597	-0.00014	0.00053	0.00582	0.11063	1	Cu2-H24-C28-N2-Cl2-O8	0.0605953	0.0987211	['[Cu]', '[OH2][Cu]']	['[O-]C(=O)C(c1ccccc1Cl)[O]', 'n1ccc(cc1)C=Cc1ccncc1']	66	1.67903	Polar	equal	Converged
BUXBUR_FSR	['12']	[48]	[2]	[2, 2, 2, 2]	[48 48 48 48]	vasp	[2.273]	-2e-05	0	2e-05	-0.11062	0	0	0	0	0	0	-0.03532	0	0	0	0	0	0	0.01744	0.11062	222	Cd4-H36-C20-N4-Cl8-O8	0.03879	0.07183	['Cl[Cd]Cl']	['[O-]C(=O)C1CCC[NH2]1']	80	2.15941	Non-polar	equal	Converged
XEDPON_FSR	['12']	[30]	[2]	[2, 2, 2, 2]	[30 30 30 30]	vasp	[2.115]	0.00057	-0.00048	0.00011	0.00843	0.1101	-0.0001	-0.00019	0.00017	4e-05	-0.11008	0.00841	0.00023	-0.00203	0.00196	-4e-05	0	0	0.00288	0.110429	-4	C28-H24-N16-O8-Zn4	0.130585	0.134433	['[Zn]']	['C1=N[C]2C(=[N]=CN=C2)[N]1', 'N1=C[C]2C(=NC=N2)N=C1']	80	1.46356	Non-polar	equal	Converged
YIHWAO_FSR	['11']	[29]	[2]	[2, 2]	[29 29]	vasp	[1.539]	1e-05	0.0006	-0.00063	-0.02481	-0.00039	0.00257	-0.0832	-0.06755	-0.01534	0	-0.02106	0	-0.00018	-0.00038	4e-05	0.0825	-0.00018	-0.01789	0.110293	2	C16-Cu2-H16-N2-O10	0.131376	0.143561	['[Cu][Cu]']	['[O-]C(=O)c1cc(C(=O)[O-])c(cc1C(=O)[O-])C(=O)[O-]']	46	1.77787	Polar	equal	Converged
EJODIS_FSR	['1']	[37]	[1]	[1, 1, 1, 1]	[37 37 37 37]	vasp	[1.346]	0.01816	0.01147	0.01192	0	-0.00878	0	0.00017	0.00013	7e-05	-0.00021	-2e-05	0.00292	-0.05053	0.0091	0.09723	0	0.0071	0	0.110214	m	C72-H44-N16-O12-Rb4	0.097949	0.060041	['[Rb]']	['N#C[C](C(=C(C#N)C#N)C(=O)c1ccccc1C(=O)OC(C)C)C#N']	148	1.53775	Polar	equal	Converged
ZOMNEW_FSR	['6', '12']	[42, 30]	[6, 2]	[6, 2]	[42 30]	vasp	[3.216, 2.549]	2e-05	1e-05	-2e-05	0.02319	1e-05	-0.0493	-0.07764	-0.07727	-0.00237	0	-0.01152	0	-2e-05	0	-1e-05	-0.05578	0	-0.03254	0.110168	2	C14-H18-Mo1-N4-O4-Zn1	0.0757045	0.113443			42	1.2582	Polar	equal	Converged
WURNOM_FSR	['11']	[29]	[1]	[1, 1]	[29 29]	vasp	[0.511]	-0.05294	0.00709	0.02556	0	-0.0215	0	1e-05	-3e-05	-2e-05	-0.08017	0.00011	-0.00862	0.04054	0.01986	-0.08915	0	-0.00668	0	0.110139	m	Cu2-H28-C28-I2-N4-O4	0.133364	0.164707			68	1.98461	Polar	equal	Converged
GAJBEB_FSR	['11']	[29]	[1]	[1, 1, 1, 1]	[29 29 29 29]	vasp	[0.569]	-4e-05	-6e-05	-8e-05	-0.01666	-3e-05	0.02735	0.0396	-0.01526	-0.07771	0	-0.06527	0	-0.00014	-0.00015	-0.00032	-0.03494	-0.00012	-0.00713	0.110001	2	Cu4-H20-C26-I4-N8	0.0358291	0.133591			62	2.61206	Polar	equal	Converged
ROGROV_FSR	['12']	[48]	[2]	[2, 2, 2, 2]	[48 48 48 48]	vasp	[2.252]	1e-05	-1e-05	-1e-05	0	0.02348	0	-1e-05	-3e-05	-1e-05	-0.01725	0	0	-0.03016	-0.08403	-0.06269	0	0	0	0.10909	mm2	C64-Cd4-H48-N8-O24	0.02048	0.112892	['[Cd]']	['[O-]C(=O)C1C2C(=O)O[Cd]34OC(=O)C1C(C(C2C(=O)[O-])[C](O3)O4)C(=O)[O-]']	148	1.42371	Polar	equal	Converged
TAHVOQ_FSR	['14']	[82]	[2]	[2, 2]	[82 82]	vasp	[2.862]	-7e-05	-7e-05	7e-05	-0.00042	5e-05	0.00072	0.1013	-0.0052	0.01779	0	-0.03452	0	3e-05	0	7e-05	0.01394	1e-05	0.00131	0.108613	2	H40-Pb2-C40-O10	0.0257183	0.121341			92	1.9507	Polar	equal	Converged
COHVOM01_FSR	['12']	[30]	[2]	[2, 2]	[30 30]	vasp	[1.904]	0.02449	0.01612	-0.05376	0	0.01368	0	1e-05	-1e-05	1e-05	-0.03888	0	0.08671	-0.06553	-0.03054	0.05639	0	0.00312	0	0.108324	m	Br4-C24-H20-N4-O4-Zn2	0.131193	0.103549	['Br[Zn]Br']	['[O-]C(=O)CN1[CH]C=C(C=C1)c1ccncc1']	58	1.75925	Polar	equal	Converged
BOJKAM_FSR	['10']	[28]	[2]	[2, 2, 2, 2]	[28 28 28 28]	vasp	[1.774]	0	0	0	0.10796	0	0	0	1e-05	1e-05	0	0.09834	0	0	0	0	0	0	0.05411	0.10796	222	Ni4-H36-C16-N4-O24	0.07702	0.09242	['[OH2][Ni][OH2]']	['[O-]C(=O)CC(C(=O)[O-])N']	84	1.85199	Non-polar	equal	Converged
WEZXAB01_FSR	['13']	[49]	[3]	[3, 3, 3, 3, 3, 3]	[49 49 49 49 49 49]	vasp	[3.433]	-3e-05	-6e-05	-6e-05	-0.0968	-0.03052	0	-4e-05	-4e-05	-4e-05	-0.03048	0.09677	0	-0.05943	-0.05943	-0.06756	0	0	0	0.107835	6	In6-H18-C18-O36	0.0842966	0.185797	['[In]']	['[O-]C=O']	78	2.59653	Polar	equal	Converged
GOFNEV_FSR	['12']	[48]	[2]	[2, 2]	[48 48]	vasp	[2.684]	0.00138	0.00064	-0.00032	0	0.1077	0	0.00012	2e-05	2e-05	-0.05051	0	0	-0.06413	-0.05191	-0.0015	0	0	0	0.107725	mm2	C16-Cd2-H12-N24	0.0514311	0.13272	['[Cd]']	['N1=C[N]C(=N1)n1cnnc1']	54	2.26959	Polar	equal	Converged
HESMIE_FSR	['12']	[30]	[2]	[2, 2, 2, 2, 2, 2, 2, 2]	[30 30 30 30 30 30 30 30]	vasp	[2.521]	0.02184	0.01087	-0.03055	0.01241	-0.01024	0.03614	0.06473	0.02878	0.0094	-0.01116	0.02098	0.04948	0.02976	0.01633	-0.01648	0.00453	0.00277	0.02862	0.107096	1	Zn8-H48-C48-N4-O30	0.019119	0.107142			138	2.13146	Polar	equal	Converged
QUCVIU_FSR	['11']	[29]	[1]	[1, 1, 1, 1]	[29 29 29 29]	vasp	[0.676]	-0.00049	7e-05	0.00037	-0.05511	-0.0001	-0.08929	0.03273	0.02259	-0.00343	0	-0.03897	0	0.0002	-0.0001	-0.00031	0.00453	0.00011	-0.02736	0.107052	2	Cu4-H18-C28-S4-N10	0.0729373	0.0787655	['[Cu]']	['[S]C#N', 'c1ccc(cn1)c1nc2c([nH]1)cccc2']	64	2.07835	Polar	equal	Converged
EBIKIK_FSR	['8', '1']	[26, 19]	[2, 1]	[2, 2, 1, 1, 1, 1]	[26 26 19 19 19 19]	vasp	[0.873, 1.067]	-0.00017	-2e-05	-7e-05	0.03187	0	0	-0.00015	-0.00023	-0.00016	0	0.03179	0	5e-05	5e-05	4e-05	0	0	0.10699	0.10699	-42m	C48-Fe2-H40-K4-S8	0.06173	0.11598			102	1.47286	Non-polar	equal	Converged
JATKIB_FSR	['14']	[50]	[4]	[4, 4]	[50 50]	vasp	[2.819]	0.00426	-0.04394	0.01803	-0.00514	-0.00388	-0.0054	-0.0129	-0.03088	-0.00434	-0.00975	-0.0101	-0.03776	-0.00143	-0.08872	-0.01092	0.00264	0.01497	-0.01115	0.106936	1	Sn2-H28-C12-O6	0.0513724	0.130272	['[Sn]']	['[O-]C(=O)COC']	48	1.84484	Polar	equal	Converged
XOVXIQ_FSR	['12']	[30]	[2]	[2, 2]	[30 30]	vasp	[2.344]	1e-05	0	1e-05	-0.00838	0	0.00061	-0.09845	0.03422	-0.01633	0	0.01675	0	-2e-05	0	-1e-05	-0.02309	1e-05	0.06378	0.106821	2	Zn2-H34-C42-N10-O10	0.0511483	0.108362	['[Zn]']	['[O-]C(=O)c1[n+]([O-])cccc1C(=O)[O-]', 'c1ncn(c1)Cc1ccc(cc1)Cn1cncc1']	98	1.62276	Polar	equal	Converged
RIZZAB_FSR	['1']	[3]	[1]	[1, 1]	[3 3]	vasp	[1.183]	-0.02771	-0.01152	-0.02786	0	0.00058	0	2e-05	9e-05	0.00014	0.06019	0	0.04499	0.06264	0.05978	0.04633	0	-0.01705	0	0.106615	m	C22-H26-Li2-N8-O2	0.102794	0.155269			60	1.31054	Polar	equal	Converged
HEPNIA_FSR	['1']	[3]	[1]	[1, 1, 1, 1]	[3 3 3 3]	vasp	[1.13]	-0.00011	3e-05	0	0.00152	-0.0674	-2e-05	-0.00025	0.00014	-3e-05	-0.06737	-0.00149	-0.00025	0.01948	0.01948	-0.10281	0	0	0	0.106437	4	Li4-H32-C28-N16-Cl4-O16	0.0429213	0.110299	['[Li]']	['[O]Cl.[O].[O]']	100	1.58518	Polar	equal	Converged
HEFXAR_FSR	['1']	[3]	[1]	[1, 1, 1, 1]	[3 3 3 3]	vasp	[1.055]	-2e-05	0.00014	3e-05	0.02117	0	0	-9e-05	0.00011	3e-05	0	-0.00237	0	-8e-05	5e-05	0	0	0	0.1064	0.1064	222	Li4-H16-C8-N4-O8	0.05353	0.0820601	['[Li]']	['[O-]C(=O)CN']	40	1.50655	Non-polar	equal	Converged
JIZKIO_FSR	['12']	[30]	[2]	[2, 2]	[30 30]	vasp	[2.147]	-0.0389	-0.08068	0.00848	0	-0.03638	0	2e-05	3e-05	2e-05	0.0267	-5e-05	0.05772	-0.05861	0.02598	-0.06569	0	0.03671	0	0.106364	m	C28-H28-N8-O8-Zn2	0.229629	0.236882	['[Zn]']	['[O-]C(=O)CCC(=O)[O-]']	74	1.56617	Polar	equal	Converged
FIGHEJ_FSR	['12']	[48]	[2]	[2, 2]	[48 48]	vasp	[2.284]	0	0.00011	8e-05	-0.03633	-1e-05	0.01216	-0.06437	-0.08132	-0.01768	0	0.0156	0	5e-05	8e-05	-9e-05	0.02922	-3e-05	0.00758	0.10636	2	Cd2-H16-C24-I4-N8-O2	0.122299	0.0814901	['I[Cd]I']	['n1ccc(cc1)c1nnc(o1)c1ccccn1']	56	2.43344	Polar	equal	Converged
KEWXIV_FSR	['12']	[30]	[2]	[2, 2, 2, 2]	[30 30 30 30]	vasp	[2.127]	0	0	1e-05	0	-0.03539	0	1e-05	1e-05	3e-05	-0.04665	0	0	0.02352	-0.09977	0.02833	0	0	0	0.106348	mm2	Zn4-H36-C48-N24-Cl4-O4	0.0990197	0.1813	['Cl[Zn]']	['Cc1[nH]c(=O)c(cc1c1ccncc1)C1=NN=N[N]1']	120	1.7293	Polar	equal	Converged
LIWXIZ_FSR	['12']	[30]	[2]	[2, 2, 2, 2]	[30 30 30 30]	vasp	[2.26]	3e-05	4e-05	3e-05	-0.00146	2e-05	-0.02102	0.02331	0.0641	0.05557	0	0.05912	0	3e-05	3e-05	2e-05	0.03666	1e-05	0.01505	0.105997	2	Zn4-H40-C62-N8-O18	0.0714767	0.164535	['[Zn]']	['O=C(c1ccc(c(c1)C(=O)[O-])C(=O)[O-])c1ccc(c(c1)C(=O)[O-])C(=O)[O-]', 'c1ncn(c1)Cc1ccc(cc1)Cn1cncc1']	132	1.63959	Polar	equal	Converged
BIYTEJ_FSR	['12']	[30]	[2]	[2, 2, 2, 2, 2, 2]	[30 30 30 30 30 30]	vasp	[2.215]	0	6e-05	1e-05	0.06415	0.04107	-9e-05	2e-05	1e-05	0	0.04122	-0.06389	5e-05	-0.00426	-0.00426	0.10575	0	0	0	0.105921	6	Zn6-H12-C36-N60	0.0224419	0.100465	['[Zn]']	['N1=NN=C([N]1)c1nccnc1C1=NN=N[N]1']	114	1.37958	Polar	equal	Converged
DATYOM01_FSR	['7']	[25]	[2]	[2, 2]	[25 25]	vasp	[2.386]	1e-05	-4e-05	-2e-05	0.02401	0	0	0	-5e-05	-2e-05	0	0.02396	0	2e-05	2e-05	-2e-05	0	0	0.1056	0.1056	-42m	Mn2-H32-C16-N4-O20	0.0676	0.04364	['[OH2][Mn][OH2]']	['[O-]C(=O)C[NH2]CC(=O)[O-]']	74	1.90633	Non-polar	equal	Converged
LIHBUB_FSR	['12']	[30]	[2]	[2, 2, 2, 2]	[30 30 30 30]	vasp	[2.518]	0	0.00015	-0.00019	0.06209	0	0	-1e-05	0	0	0	0.01347	0	0	0	-1e-05	0	0	0.10549	0.10549	222	Zn4-H28-C40-N12-O20	0.04204	0.10734	['[OH2][Zn]']	['[O-]C(=O)c1[nH]c(nc1C(=O)[O-])c1cccnc1']	104	2.10421	Non-polar	equal	Converged
EVAHAM_FSR	['1']	[11]	[1]	[1, 1, 1, 1]	[11 11 11 11]	vasp	[1.177]	-1e-05	-3e-05	-1e-05	0.02542	0	0	-0.00045	1e-05	-0.00012	0	0.08355	0	2e-05	-1e-05	1e-05	0	0	0.10537	0.10537	222	Na4-H40-C36-S4-N8-O20-F12	0.11194	0.04441	['[OH2][Na]']	['O=C(Nc1ccc(cc1)C(F)(F)F)NCS([O])([O])[O]']	124	1.79434	Non-polar	equal	Converged
POPVIC_FSR	['10']	[28]	[2]	[2, 2]	[28 28]	vasp	[1.455]	-0.02405	-0.0506	-0.0264	0	-0.00914	0	0	1e-05	1e-05	-0.01567	0	0.00839	-0.07331	-0.02878	-0.04345	0	0.02358	0	0.105165	m	C56-H40-N4-Ni2-O8	0.0555199	0.109049	['[Ni]']	['[O-]C(=O)c1ccc(cc1)C=Cc1ccncc1']	110	1.26405	Polar	equal	Converged
VIWFOW_FSR	['1']	[11]	[1]	[1, 1]	[11 11]	vasp	[1.18]	0	0	0	0.0321	0	-0.05959	-0.05395	-0.02382	-0.04941	0	-0.04345	0	0	1e-05	4e-05	-0.07859	3e-05	0.03714	0.105036	2	Na2-H20-C10-N2-O10	0.0701215	0.141776	['O', '[Na]']	['O=C1CCC(N1)C(=O)[O-]']	44	1.57409	Polar	equal	Converged
WIHCUM_FSR	['1']	[11]	[1]	[1, 1, 1, 1]	[11 11 11 11]	vasp	[1.184]	-0.06874	0.06476	-0.02105	0	-0.03274	0	1e-05	0	0	0.01108	0	-8e-05	-0.00797	0.02428	-0.00144	0	-0.00928	0	0.104977	m	Na4-H24-C8-S8-O16	0.0423776	0.0824614	['O', '[Na]', '[OH2][Na]']	['[O]S(CCSSCCS([O])([O])[O])([O])[O]']	60	1.77128	Polar	equal	Converged
CIFGOP_FSR	['12']	[30]	[2]	[2, 2, 2, 2]	[30 30 30 30]	vasp	[2.392]	-0.03782	-0.0243	0.09341	0	0.01395	0	0	0	3e-05	-0.00603	0	-0.02052	-0.01415	-0.00517	-0.00181	0	0.0197	0	0.104869	m	Zn4-H52-C60-N4-O20	0.0874557	0.125137	['[Zn]']	['[O-]C(=O)c1ccc(c2c1cccc2)C(=O)[O-]']	140	1.72749	Polar	equal	Converged
MGPHCU_FSR	['2', '11']	[12, 29]	[2, 2]	[2, 2, 2, 2]	[12 12 29 29]	vasp	[2.257, 1.749]	2e-05	-5e-05	3e-05	0.10482	0	0	3e-05	-1e-05	0	0	-0.09478	0	6e-05	6e-05	2e-05	0	0	0.01462	0.10482	222	Mg2-Cu2-H32-C32-O24	0.02283	0.12765	['[Cu]', '[OH2][Mg]([OH2])([OH2])[OH2]']	['[O-]C(=O)c1ccccc1C(=O)[O-]']	92	1.77523	Non-polar	equal	Converged
TEVQIU01_FSR	['12']	[80]	[2]	[2, 2, 2, 2]	[80 80 80 80]	vasp	[2.108]	-6e-05	-9e-05	-7e-05	-0.00975	-3e-05	-0.01375	-0.05347	-0.02565	-0.0146	0	-0.02399	0	0	0	0	-0.04989	0	-0.08994	0.104206	2	C30-Cl4-H54-Hg4-N2-S4	0.0780409	0.132726	['Cl[Hg]Cl', '[Hg]']	['[S]CC(C)(C)C']	98	2.35971	Polar	equal	Converged
OJALAO_FSR	['12']	[30]	[2]	[2, 2]	[30 30]	vasp	[2.284]	-4e-05	1e-05	0	-0.0322	-1e-05	-0.01049	-0.01461	0.01136	0.01925	0	0.02957	0	0	0	0	-0.09839	0	0.01359	0.103983	2	C34-H34-N2-O8-Zn2	0.0837429	0.175038	['[Zn]']	['[O-]C(=O)C(Cc1ccccc1)NCc1ccccc1', '[O-]C=O']	80	1.52256	Polar	equal	Converged
MILBEO_FSR	['13']	[81]	[1]	[1, 1, 1, 1, 1, 1]	[81 81 81 81 81 81]	vasp	[1.668]	-0.00181	-0.00189	-0.00141	0.00024	0.04126	0.00562	0.00453	-0.00669	-0.00089	0.04101	0	0	-0.03457	-0.03457	-0.09145	0	0	0	0.103746	3m	C48-H54-O6-Tl6	0.0845167	0.121378			114	2.6882	Polar	equal	Converged
OXUNUR_FSR	['12']	[30]	[2]	[2, 2]	[30 30]	vasp	[2.326]	-2e-05	2e-05	-4e-05	0	0.0224	0	0	0.00019	3e-05	-0.09126	0	0	-0.02672	-0.03148	-0.09517	0	0	0	0.103742	mm2	C32-H24-N4-O16-Zn2	0.0996373	0.17471	['[Zn]']	['[O-]C(=O)C1=CC=C(N([CH]1)C)C(=O)[O-]']	78	1.78047	Polar	equal	Converged
SOSKOC_FSR	['9']	[27]	[2]	[2, 2]	[27 27]	vasp	[1.532]	0	1e-05	-6e-05	0.0329	-4e-05	0.0522	0.05861	0.0756	0.02071	0	0.03342	0	-1e-05	0	1e-05	0.01519	1e-05	0.00133	0.103423	2	Co2-H28-C28-N8-Cl4	0.0812739	0.10845	['Cl[Co]Cl']	['c1ccn([n-]1)Cc1ccc(cc1)Cn1[n-]ccc1']	70	1.63273	Polar	equal	Converged
YIQMOA_FSR	['1']	[11]	[1]	[1, 1, 1, 1]	[11 11 11 11]	vasp	[1.245]	-3e-05	7e-05	-3e-05	0	0.04127	0	2e-05	0.00021	-7e-05	0.00251	0	0	0.0353	0.05055	0.08289	0	0	0	0.103306	mm2	Na4-H24-C24-S8-N4-O20	0.136429	0.202388	['[OH2][Na]']	['O=S1(=O)[N]S(=O)(=O)c2c1cccc2']	84	1.79988	Polar	equal	Converged
MEYFIF01_FSR	['2']	[38]	[2]	[2, 2]	[38 38]	vasp	[2.521]	0.00871	-0.00178	-0.01737	-0.00104	0.00244	-0.00349	0.0062	0.05486	0.00298	-0.00082	-0.02677	-0.01455	-0.09278	-0.02622	-0.00157	0.00341	-0.00557	-0.03053	0.103044	1	Sr2-H18-C8-O15	0.0275337	0.110854	['[OH2][Sr]([OH2])[OH2]', '[OH2][Sr][OH2]']	['[O-]C(=O)CC(C(=O)[O-])O']	43	2.1205	Polar	equal	Converged
BAXPOG_FSR	['12']	[80]	[2]	[2, 2]	[80 80]	vasp	[1.998]	-0.00125	-0.00021	0.00114	0.00255	-0.00105	-0.05149	0.09099	0.01328	-0.04401	0	-0.01354	0	0.0003	0.0002	-0.00068	-0.05829	0.00098	0.00793	0.102855	2	Br4-C54-H36-Hg2-N4-O2	0.0938154	0.149947			102	1.97426	Polar	equal	Converged
XISDEJ01_FSR	['11']	[29]	[2]	[2, 2]	[29 29]	vasp	[1.648]	1e-05	-1e-05	-3e-05	-0.01632	7e-05	-0.02317	-0.06403	-0.07881	0.0018	0	0.0145	0	0.00011	-3e-05	4e-05	0.00846	7e-05	-0.02556	0.102588	2	Cu2-H26-C22-N2-O12	0.0736146	0.141139	['[OH2][Cu]']	['[O-]C(=O)CC(C(=O)[O-])NCc1ccccc1O']	64	1.74737	Polar	equal	Converged
BOYSIT_FSR	['12']	[30]	[2]	[2, 2]	[30 30]	vasp	[2.322]	0.06541	-0.03383	-0.06227	0	0.0101	0	1e-05	1e-05	1e-05	0.01956	0	-0.02598	-0.04283	0.02464	-0.03891	0	-0.05995	0	0.102548	m	Zn2-H42-C62-N10-O14	0.078404	0.152227	['[Zn]']	['[O-]C(=O)c1ccc(cc1)Oc1ccc(cc1)C(=O)[O-]']	130	1.50693	Polar	equal	Converged
NEBVIC_FSR	['11']	[29]	[1]	[1, 1, 1, 1]	[29 29 29 29]	vasp	[0.756]	2e-05	0.00018	-7e-05	0.06826	0	0	0	0	1e-05	0	0.02687	0	0	0	0	0	0	0.10233	0.10233	222	Cu4-H24-C20-Br4-N8	0.09572	0.19805			60	2.4133	Non-polar	equal	Converged
ESUMOU_FSR	['7']	[25]	[2]	[2, 2, 2, 2]	[25 25 25 25]	vasp	[2.383]	5e-05	0.00015	6e-05	-0.03402	0	0	-0.00015	0.00044	-7e-05	0	-0.1022	0	8e-05	3e-05	1e-05	0	0	-0.0604	0.102201	222	Mn4-H24-C16-O24	0.10839	0.0606002	['[OH2][Mn]']	['[O-]C(=O)COCC(=O)[O-]']	68	2.12922	Non-polar	equal	Converged
LINJEY_FSR	['13']	[81]	[1]	[1, 1, 1, 1]	[81 81 81 81]	vasp	[1.733]	0	2e-05	0	0	-0.00425	0	2e-05	-0.00011	4e-05	-0.03329	0	0	0.04772	-0.01764	-0.08829	0	0	0	0.101899	mm2	C28-H24-N4-O8-Tl4	0.0375902	0.110311			68	2.94602	Polar	equal	Converged
HIXZOD_FSR	['2']	[56]	[2]	[2, 2, 2, 2]	[56 56 56 56]	vasp	[2.764]	0.00016	0.00019	5e-05	0.01864	0	0	4e-05	0.00017	-6e-05	0	-0.10176	0	-6e-05	-6e-05	-1e-05	0	0	-0.04056	0.10176	222	Ba4-H16-C16-O24	0.04822	0.11021			60	3.00194	Non-polar	equal	Converged
BOXDID_FSR	['1']	[55]	[1]	[1, 1, 1, 1]	[55 55 55 55]	vasp	[1.374]	4e-05	6e-05	2e-05	0.10167	0	0	1e-05	0	1e-05	0	0.06711	0	0	0	0	0	0	-0.08085	0.10167	222	Cs4-P4-H16-C8-O24	0.08767	0.16852			56	2.72848	Non-polar	equal	Converged
PARQEG_FSR	['1']	[11]	[1]	[1, 1]	[11 11]	vasp	[1.266]	0	0	0	-0.01008	0	-0.01743	-0.01974	-0.06905	-0.06864	0	0.0194	0	2e-05	0	2e-05	-0.04115	0	0.01922	0.101219	2	Na2-H40-C34-N2-O8	0.0674118	0.1512	['[Na]']	['COc1ccc2c(c1)ccc(c2)C(C(=O)[O-])C']	86	1.31029	Polar	equal	Converged
RUGNUE_FSR	['3']	[39]	[3]	[3]	[39]	vasp	[4.184]	-4e-05	2e-05	3e-05	-0.07199	1e-05	-0.06187	-0.00342	-0.08403	0.01613	0	-0.00522	0	-1e-05	1e-05	-3e-05	0.01985	0	-0.065	0.101055	2	C5-H9-N2-O8-Y1	0.144458	0.212525	['[Y]']	['[O-]C=O']	25	2.08949	Polar	equal	Converged
AXEWAD_FSR	['11']	[29]	[1]	[1, 1, 1, 1]	[29 29 29 29]	vasp	[0.701]	-0.01087	-0.02657	-0.08674	0	0.00312	0	-2e-05	-2e-05	0	-0.01235	1e-05	0.0649	-0.01249	-0.04793	-0.02423	0	0.01592	0	0.100969	m	C34-Cu4-H40-I4-N8-S2	0.0684815	0.0912452	['I[Cu][Cu]I']	['CN1CCN([C]1[N]c1ccccc1SCc1ccccn1)C']	92	2.23743	Polar	equal	Converged
BIZSEJ01_FSR	['12']	[30]	[2]	[2, 2]	[30 30]	vasp	[2.468]	5e-05	3e-05	-1e-05	-0.06231	-1e-05	0.03242	-0.03052	-0.08621	-0.02643	0	0.03234	0	-6e-05	-0.00015	-8e-05	-0.03152	-0.00011	0.00134	0.100539	2	Zn2-H24-C12-S6-N4-O16	0.0362194	0.0826857			64	1.9672	Polar	equal	Converged
OGUMUZ_FSR	['10']	[28]	[2]	[2, 2]	[28 28]	vasp	[0.896]	-1e-05	0	0	-0.02018	-1e-05	-0.00534	-0.04427	-0.0693	0.04896	0	-0.03065	0	0.00011	0	2e-05	-0.04674	7e-05	-0.02526	0.100493	2	Ni2-H32-C34-S2-N4-O14	0.0768296	0.131143			88	1.63652	Polar	equal	Converged
LOVTEV_FSR	['11']	[29]	[1]	[1, 1]	[29 29]	vasp	[0.478]	-7e-05	-2e-05	0.00022	-0.01325	0.00012	-0.04747	-0.03768	-0.07305	-0.03095	0	0.04849	0	-7e-05	7e-05	-0.00018	-0.06516	0.00016	-0.0046	0.100326	2	Cu2-H6-C10-S2-Br2-N6	0.117708	0.0883934	['[Cu]']	['[S]C#N']	28	2.5049	Polar	equal	Converged
BUSHUU_FSR	['12']	[30]	[2]	[2, 2]	[30 30]	vasp	[2.185]	5e-05	-3e-05	-4e-05	0.0471	0	0.06694	0.07163	-0.0239	-0.02566	0	-0.00066	0	9e-05	-0.00018	-0.00058	-0.08693	5e-05	0.02258	0.100275	2	Zn2-H22-C20-N2-O14	0.120523	0.167788	['[OH2][Zn][OH2]']	['CC(=O)Nc1cc(cc(c1)C(=O)[O-])C(=O)[O-]']	60	1.76277	Polar	equal	Converged
MAQVOR_FSR	['fblock']	[70]	[3]	[3, 3]	[70 70]	vasp	[3.765]	0.06571	-0.06577	0	0.03747	0	0	-0.00014	2e-05	-8e-05	5e-05	-0.03755	-0.06573	0.00011	0.00011	0.00017	0	0	0	0.100237	32	C9-H18-O24-Yb2	0.098537	0.0391849	['[OH2][Yb]([OH2])[OH2]']	['[O-]C(=O)C(C(=O)[O-])(O)O']	53	2.67296	Non-polar	equal	Converged
CAKFAY_FSR	['12']	[48]	[2]	[2, 2, 2, 2]	[48 48 48 48]	vasp	[2.427]	2e-05	1e-05	1e-05	0	-0.09993	0	0	0	0	0.03205	0	0	-0.02086	0.01497	-0.05865	0	0	0	0.09993	mm2	Cd4-H32-C48-N8-O16	0.0407066	0.08101	['[Cd]']	['[O-]C(=O)c1ccccn1']	108	1.94609	Polar	equal	Converged
PEXWAQ01_FSR	['fblock']	[57]	[3]	[3, 3]	[57 57]	vasp	[4.825]	0.0008	0.00136	0.00061	-0.00076	-0.02348	0.05208	0.05321	-0.05186	0.00034	-0.02236	0	0	-0.0661	-0.0661	-0.03457	0	0	0	0.0997001	3m	C54-H42-La2-O12	0.134935	0.159762	['[La]']	['[O-]C(=O)C=Cc1ccccc1']	110	1.65371	Polar	equal	Converged
IROTAL_FSR	['11']	[29]	[2]	[2, 2, 1, 1]	[29 29 29 29]	vasp	[1.703]	7e-05	2e-05	0.0001	0	-0.01869	0	1e-05	0	-2e-05	0.03589	0	0	-0.02303	0.01286	0.09602	0	0	0	0.0995771	mm2	C36-Cl2-Cu4-H24-N8-O4	0.0868809	0.181352	['[Cu]']	['Cl[Cu]1Oc2c(O1)nc1c(n2)cccc1']	78	1.9866	Polar	equal	Converged
FUSPIS10_FSR	['2']	[20]	[2]	[2, 2, 2, 2]	[20 20 20 20]	vasp	[2.826]	7e-05	0.00025	-0.0002	-0.09953	0	0	-1e-05	1e-05	-1e-05	0	-0.03817	0	2e-05	0	1e-05	0	0	0.01434	0.0995305	222	Ca4-H64-C40-O28	0.01053	0.11006	['[OH2][Ca]([OH2])[OH2]']	['CC[C]1C(=O)C(=C(C(=O)C1=O)CC)[O]']	136	1.56418	Non-polar	equal	Converged
NEYRIV_FSR	['12']	[48]	[2]	[2, 2]	[48 48]	vasp	[2.481]	-4e-05	-1e-05	-3e-05	0.02829	1e-05	-0.04006	-0.07144	-0.02909	-0.06266	0	-0.00069	0	7e-05	1e-05	5e-05	-0.00331	1e-05	0.03473	0.0993814	2	Cd2-H20-C24-N8-O14	0.107758	0.158973	['[OH2][Cd]']	['[O]N(=O)=O']	68	2.00139	Polar	equal	Converged
CLIMZC_FSR	['12']	[48]	[2]	[2, 2, 2, 2]	[48 48 48 48]	vasp	[2.275]	-0.0015	-0.00178	-0.0032	0	0.0169	0	0	0	0	-0.01483	1e-05	-0.00364	0.05767	-0.0793	-0.01588	0	-0.00012	0	0.0993359	mm2	Cd4-H16-C12-N8-Cl8	0.0323	0.0879339			48	2.58842	Polar	equal	Converged
CURGUR_FSR	['11']	[29]	[1]	[1, 1, 1, 1]	[29 29 29 29]	vasp	[0.278]	-2e-05	0	0	0	-0.06958	0	0	0	-1e-05	-0.01539	0	0	0.02077	0.08649	0.04389	0	0	0	0.0991879	mm2	Cu4-H36-C48-S4-N16-O4	0.0966134	0.139168	['[Cu]']	['[S]C#N']	112	1.6475	Polar	equal	Converged
AWIBOZ_FSR	['12']	[30]	[2]	[2, 2]	[30 30]	vasp	[2.499]	-0.00039	9e-05	0.00141	-0.04026	0.00023	0.01374	0.00125	-0.06066	-0.00583	0	-0.01575	0	-0.00033	-9e-05	0.00224	0.08124	0.00044	-0.03781	0.0991189	2	C32-Cl2-H26-O14-Zn2	0.103406	0.190659	['[OH2][Zn]']	['CC(C(=O)[O-])Oc1ccc(cc1)Oc1ccc(cc1Cl)C(=O)[O-]']	76	1.64495	Polar	equal	Converged
OCIBEK_FSR	['12']	[30]	[2]	[2, 2]	[30 30]	vasp	[2.802]	-3e-05	0	-2e-05	-0.00881	0	0.04655	0.05174	0.06571	-0.04516	0	-0.02743	0	1e-05	0	0	-0.01431	0	0.02416	0.0989276	2	Zn2-H24-C42-N24	0.0249907	0.0891263	['[Zn]']	['c1ccc(cn1)n1c(nnc1c1cccnc1)c1ccncc1']	92	1.60845	Polar	equal	Converged
BEKVOD_FSR	['12']	[30]	[2]	[2, 2, 2, 2, 2, 2]	[30 30 30 30 30 30]	vasp	[2.144]	-0.00179	-0.00087	-0.00251	-0.00037	0.03013	0.03688	0.03719	-0.03803	-0.00069	0.03055	0	0	0.0696	0.0696	-0.00583	0	0	0	0.098624	3m	C48-H36-N24-O12-Zn6	0.183237	0.240253	['[Zn]']	['O=C1C=C[N]C=N1', 'O=C1[CH]C=NC=N1', 'O=C1[N]C=NC=C1']	126	1.74143	Polar	equal	Converged
QIKXIR_FSR	['12']	[30]	[2]	[2, 2, 2, 2]	[30 30 30 30]	vasp	[1.923]	1e-05	0	2e-05	0.09859	0	0	0	0	0	0	-0.05838	0	2e-05	1e-05	3e-05	0	0	0.05852	0.09859	222	Zn4-H48-C40-S8-N16-O16	0.09659	0.19518	['[Zn]']	['[O-]C(=O)c1ccccc1C(=O)[O-]']	132	1.78801	Non-polar	equal	Converged
FOMNOM_FSR	['14']	[50]	[4]	[4, 4]	[50 50]	vasp	[2.873]	0.0405	-0.00751	0.0464	0.02927	0.01442	-0.0432	-0.01563	0.00639	0.03764	0.01353	0.05647	-0.02523	9e-05	0.00529	0.00446	0.00146	0.03101	0.02388	0.0984893	1	Sn2-H40-C28-N4-O12	0.0587322	0.0976647	['[Sn]']	['COc1ccc(cc1NC(=O)CCC(=O)[O-])N(=O)=O']	86	1.71906	Polar	equal	Converged
HERPUQ_FSR	['11']	[29]	[2]	[2, 2]	[29 29]	vasp	[1.687]	0	0	0	0.07937	0	0.01776	-0.00434	0.02764	0.01489	0	0.08813	0	0	0	0	0.05577	0	0.00302	0.0983675	2	Cu2-H30-C34-Br2-N8-O8	0.0384913	0.123985	['[Cu]']	['Brc1cc(cc(c1)Cn1cncc1)Cn1cncc1', '[O-]C(=O)CC(=O)[O-]']	84	1.70191	Polar	equal	Converged
VOQBUZ_FSR	['12']	[48]	[2]	[2, 2]	[48 48]	vasp	[2.632]	3e-05	0.00015	-2e-05	0.09826	0	0	9e-05	6e-05	-2e-05	0	-0.09825	0	2e-05	2e-05	1e-05	0	0	0	0.0982601	422	C24-Cd2-H20-N4-O8	0.05284	0.1511	['[Cd]']	['[O-]C=O', 'n1ccc(cc1)c1ccncc1']	58	1.93215	Non-polar	equal	Converged
HEYQUA_FSR	['11']	[29]	[2]	[2, 2]	[29 29]	vasp	[1.206]	1e-05	-2e-05	-1e-05	0.04069	1e-05	0.06521	0.06837	-0.04184	0.03194	0	0.0463	0	1e-05	1e-05	1e-05	0.01041	0	-0.03789	0.0979229	2	Cu2-H30-C26-S2-N2-O8	0.157642	0.158238	['[Cu]']	['CSCCC(C(=O)[O-])N=Cc1cccc(c1[O])OC']	70	1.57145	Polar	equal	Converged
TANVUZ_FSR	['2']	[20]	[2]	[2, 2]	[20 20]	vasp	[2.32]	-0.00015	-0.00012	9e-05	0	0.03917	0	5e-05	-0.00018	-3e-05	-0.04789	0	0	0.07267	-0.0649	0.00808	0	0	0	0.0977663	mm2	C20-Ca2-Cl4-H20-N4	0.02896	0.0977097			50	1.53652	Polar	equal	Converged
GEWKAW_FSR	['2']	[12]	[2]	[2, 2]	[12 12]	vasp	[2.242]	-5e-05	0.00011	-5e-05	0.09741	0	0	2e-05	1e-05	0	0	0.08789	0	-7e-05	-3e-05	1e-05	0	0	0.04403	0.0974101	222	Mg2-H28-C24-N4-O16	0.01742	0.0807701	['[OH2][Mg]([OH2])([OH2])[OH2]']	['[O-]C(=O)c1cccnc1c1ncccc1C(=O)[O-]']	74	1.61498	Non-polar	equal	Converged
PIRTAN_FSR	['1']	[55]	[1]	[1, 1, 1, 1]	[55 55 55 55]	vasp	[1.332]	0.0001	-1e-05	0.00018	-0.00522	0	0	0	0	0	0	0.05873	0	0	0	0	0	0	0.09732	0.09732	222	Cs4-H40-C20-Cl4-O20	0.02951	0.11875	['[Cs]']	['OC1COC(C(C1O)O)O']	88	2.34603	Non-polar	equal	Converged
IWECIY_FSR	['10']	[28]	[2]	[2, 2]	[28 28]	vasp	[0.712]	0	0	0	0.03333	0	0.07199	0.04319	0.00397	-0.00146	0	0.05923	0	0	1e-05	0	0.06094	0	0.02656	0.0970016	2	Ni2-H44-C44-N8-O18	0.0592909	0.0930589	['[Ni]']	['O=C(c1ccncc1)N1CCN(CC1)C(=O)c1ccncc1', '[O-]C(=O)c1ccc(o1)C(=O)[O-]']	116	1.48204	Polar	equal	Converged
ATIDOY_FSR	['12']	[48]	[2]	[2]	[48]	vasp	[2.938]	0	0	0	0.06201	0	0	3e-05	-3e-05	2e-05	0	0.0437	0	0	0	0	0	0	0.097	0.097	222	C44-Cd1-H32-N8-O8-S2	0.14256	0.08055	['[Cd]']	['O=S(=O)(c1ccc(cc1)n1cncc1)c1ccc(cc1)n1cncc1']	95	1.62498	Non-polar	equal	Converged
OBAGOQ_FSR	['fblock']	[57]	[3]	[3, 3]	[57 57]	vasp	[4.293]	-0.00033	-8e-05	7e-05	0.0239	3e-05	0.05331	0.00019	0.09574	-0.01479	0	0.00179	0	3e-05	-2e-05	6e-05	-0.0291	-4e-05	0.05916	0.0968925	2	La2-H24-C36-N6-O12	0.0164218	0.105926	['[La]']	['[O-]C(=O)c1ccccn1']	80	1.94769	Polar	equal	Converged
BUGDOY_FSR	['1']	[11]	[1]	[1, 1, 1, 1]	[11 11 11 11]	vasp	[1.132]	-0.00026	-0.00034	5e-05	0.04432	0	0	-0.00011	-7e-05	4e-05	0	-0.03898	0	-3e-05	0	-4e-05	0	0	-0.09688	0.09688	222	Na4-H36-C20-N8-O20	0.03242	0.1181	['[Na]']	['[O-]C(=O)C1CCC[NH2]1', '[O]N(=O)=O']	88	1.65721	Non-polar	equal	Converged
UHOTER_FSR	['1']	[3]	[1]	[1, 1, 1, 1]	[3 3 3 3]	vasp	[1.284]	0	0	0	0	-0.02139	0	-9e-05	0.00017	-0.00026	-0.01823	0	0	-0.06229	-0.06662	0.03222	0	0	0	0.0967286	mm2	Li4-H28-C32-Cl8-O20	0.0441804	0.117095	['[Li]']	['O=C1[C](Cl)C(=O)C(=O)C(=C1O)Cl']	92	1.74951	Polar	equal	Converged
OFOJOL_FSR	['1']	[3]	[1]	[1, 1]	[3 3]	vasp	[1.095]	2e-05	0	0	-0.03839	2e-05	-0.0052	-0.02629	0.06808	0.02218	0	-0.05903	0	1e-05	2e-05	0	-0.03844	2e-05	0.01958	0.0964497	2	Li2-H10-C6-O6	0.17768	0.189381	['[Li]']	['[O-]C(=O)C(O)C']	24	1.42889	Polar	equal	Converged
CUNFEX_FSR	['11']	[29]	[1]	[1, 1]	[29 29]	vasp	[0.756]	8e-05	0.00015	-4e-05	0.03505	6e-05	0.08554	0.06145	-0.02631	-0.01293	0	-0.01048	0	3e-05	0.00014	0.00022	-0.03076	3e-05	-0.01539	0.0962077	2	C24-Cu2-H18-I2-N4-O3	0.13106	0.104553	['[Cu][Cu](I)I']	['O=C(c1ccncc1)Nc1ccc(cc1)Oc1ccc(cc1)NC(=O)c1ccncc1']	53	2.35961	Polar	equal	Converged
JAHKIP_FSR	['1']	[11]	[1]	[1, 1]	[11 11]	vasp	[1.173]	-3e-05	0	0	0.01814	0	0.05338	0.09197	-0.02057	-0.01808	0	0.00554	0	-1e-05	0	0	0.00071	-1e-05	-0.01199	0.0961207	2	Na2-H54-C46-S2-N6-Cl2-O10	0.0511113	0.0869766	['[Na]']	['COc1ccc(cc1C(=O)NCCc1ccc(cc1)S(=O)(=O)[N]C(=O)NC1CCCCC1)Cl']	122	1.38084	Polar	equal	Converged
CEYPUT01_FSR	['9']	[27]	[2]	[2, 2]	[27 27]	vasp	[1.414]	0.00291	-0.04645	-0.02152	0	-0.00225	0	-5e-05	-2e-05	-1e-05	0.05925	-2e-05	0.03204	-0.0165	-0.07838	-0.01559	0	-0.01396	0	0.0960756	m	Co2-H16-C24-N4-O8	0.0586534	0.0946891	['[Co]']	['[O-]C(=O)c1ccncc1']	54	1.24553	Polar	equal	Converged
AJAXOY_FSR	['2']	[12]	[2]	[2, 2, 2, 2]	[12 12 12 12]	vasp	[2.759]	-1e-05	-0.00019	-0.00018	0	-0.00096	0	1e-05	1e-05	1e-05	-0.01687	0	0	0.0718	-0.0207	-0.06028	0	0	0	0.0960074	mm2	Mg4-H24-C32-O20	0.0475016	0.0699867	['[Mg]']	['COC1=C([O])C(=O)C(=C(C1=O)[O])C']	80	1.73605	Polar	equal	Converged
IMZCUC01_FSR	['11']	[29]	[2]	[2, 2]	[29 29]	vasp	[1.667]	0	0	1e-05	0	0.03285	0	3e-05	2e-05	1e-05	0.0001	0	0	0.06382	0.01172	0.07022	0	0	0	0.0956096	mm2	Cu2-H22-C18-N12-Cl2	0.11795	0.153466	['Cl[Cu]']	['C1=C[N]C=N1']	56	1.69912	Polar	equal	Converged
CEBFUL_FSR	['3']	[39]	[3]	[3, 3, 3, 3]	[39 39 39 39]	vasp	[3.774]	0.05517	-0.03011	0.00138	0	0.04006	0	0	-1e-05	0	-0.00218	0	-0.03289	0.06506	-0.01569	0.01428	0	-0.00221	0	0.0955979	m	C24-H40-O26-Y4	0.0879185	0.0693393	['[OH2][Y]', '[Y]']	['[O-]C(=O)C']	94	1.87715	Polar	equal	Converged
JARFEO_FSR	['12']	[30]	[2]	[2, 2]	[30 30]	vasp	[1.932]	0	0	-1e-05	-0.03469	-1e-05	-0.05114	-0.05166	-0.06889	-0.04112	0	-0.00419	0	-1e-05	-1e-05	-1e-05	0.01293	0	0.04603	0.0955144	2	Zn2-H28-C28-N8-Cl4	0.0812216	0.106185	['Cl[Zn]Cl']	['c1cc(cc(c1)Cn1[n-]ccc1)Cn1[n-]ccc1']	70	1.67276	Polar	equal	Converged
ALIGOS_FSR	['1']	[3]	[1]	[1, 1, 1, 1]	[3 3 3 3]	vasp	[1.162]	5e-05	0	4e-05	0	-0.03028	0	0	1e-05	0	0.02727	0	0	0.06972	0.03451	0.05477	0	0	0	0.0951398	mm2	Li4-H52-C68-N16	0.0362	0.0967045			140	1.22512	Polar	equal	Converged
ETUGUW_FSR	['1']	[19]	[1]	[1, 1, 1, 1]	[19 19 19 19]	vasp	[1.328]	-5e-05	-2e-05	0	0	0.04471	0	4e-05	7e-05	-2e-05	-0.07776	0	0	-0.00413	-0.09492	0.00397	0	0	0	0.0950928	mm2	Br4-C24-Cl4-H28-K4-N4-O14-S4	0.0672397	0.07431	['O', '[K]']	['Br[N]S(=O)(=O)c1ccccc1Cl']	86	1.98446	Polar	equal	Converged
FEFPAJ_FSR	['7']	[25]	[2]	[2, 2]	[25 25]	vasp	[2.333]	-5e-05	6e-05	-1e-05	0.02762	1e-05	-0.00665	-0.01375	0.02376	0.09078	0	0.00239	0	1e-05	3e-05	5e-05	0.04191	-3e-05	0.02308	0.09487	2	Mn2-H34-C14-Br4-N2-O8	0.0393205	0.123596	['Br[Mn]Br']	['[O-]C(=O)C1CCC[NH2]1']	64	2.07174	Polar	equal	Converged
OGOWUD_FSR	['12']	[48]	[2]	[2, 2]	[48 48]	vasp	[2.397]	-4e-05	-3e-05	-9e-05	0.00939	7e-05	0.01798	0.04685	0.07344	0.03551	0	-0.01184	0	-3e-05	-0.00013	-0.00011	0.0081	-0.00014	0.0077	0.0948131	2	Cd2-P4-H32-C26-Cl4-O18	0.0618657	0.112534	['[OH2][Cd]([OH2])[OH2]']	['ClC(P(=O)(Oc1ccccc1)Oc1ccccc1)(P(=O)([O])[O])Cl']	86	1.88821	Polar	equal	Converged
QAMFUF02_FSR	['12']	[30]	[2]	[2, 2, 2]	[30 30 30]	vasp	[2.528]	0.06629	-0.06596	3e-05	-0.01472	0	0	-0.00047	0.0004	4e-05	-0.0009	0.01327	-0.06677	0	0	0	0	0	0	0.094669	32	Zn3-H18-C42-N12-O36	0.216992	0.310062	['[Zn]']	['[O-]C(=O)c1cc(cc(c1)N(=O)=O)N(=O)=O']	111	1.9516	Non-polar	equal	Converged
QOGJIF_FSR	['12']	[30]	[2]	[2, 2, 2, 2]	[30 30 30 30]	vasp	[2.246]	0	0	0	0	0.05385	0	4e-05	1e-05	-1e-05	0.01376	0	0	0.06162	0.04935	0.05169	0	0	0	0.0943626	mm2	Zn4-H24-C32-O20	0.123486	0.160755	['[OH2][Zn]']	['[O-]C(=O)c1cccc(c1)C(=O)[O-]']	80	1.91554	Polar	equal	Converged
YIWDEO_FSR	['12']	[30]	[2]	[2, 2]	[30 30]	vasp	[2.178]	0	0	0	0.01759	0	-0.03321	0.02433	-0.03737	0.04622	0	-0.00844	0	1e-05	0	1e-05	-0.07952	0	-0.04966	0.0937979	2	Zn2-H28-C28-N4-O10	0.145403	0.151979	['[OH2][Zn]']	['[O-]C(=O)c1ccc(cc1)N']	72	1.60545	Polar	equal	Converged
OPOJUA_FSR	['11']	[29]	[2]	[2]	[29]	vasp	[1.623]	-0.00734	-0.00052	0.03726	0.00183	0.01389	-0.00565	0.0048	-0.00453	0.04828	-0.02534	0.00684	-0.01886	-0.02898	-0.04656	-0.02857	-0.01008	-0.06127	-0.00343	0.0937933	1	Cu1-H29-C32-N5-O6	0.0886701	0.108991	['[OH2][Cu]']	['O=C(c1ccccc1)NC(C(=O)[O-])CCC(=O)[O-]']	73	1.43709	Polar	equal	Converged
NAHNLA10_FSR	['1']	[11]	[1]	[1, 1, 1, 1, 1, 1, 1, 1]	[11 11 11 11 11 11 11 11]	vasp	[1.188]	-6e-05	-9e-05	4e-05	-0.09363	0	0	8e-05	-4e-05	-5e-05	0	-0.09366	0	-6e-05	7e-05	-6e-05	0	0	-0.09362	0.0936601	23	Na8-H28-C24-N4-O24	0.00209	0.0957501	['[Na]']	['[O-]C(=O)C[NH](CC(=O)[O-])CC(=O)[O-]']	88	1.86967	Non-polar	equal	Converged
BUBCOS_FSR	['12']	[30]	[2]	[2, 2, 2]	[30 30 30]	vasp	[2.263]	3e-05	3e-05	-3e-05	0.01692	0	0.00811	-0.04644	-0.07022	0.00219	0	0.04083	0	5e-05	-7e-05	1e-05	-0.02887	-4e-05	-0.01576	0.0935917	2	C24-H30-N4-O16-P4-Zn3	0.0520275	0.111941	['[OH2][Zn]']	['[O]P1(=O)O[Zn]OP(=O)(C1(C)O)O']	81	1.74213	Polar	equal	Converged
LECYEA_FSR	['12']	[80]	[2]	[2, 2]	[80 80]	vasp	[1.828]	-0.03671	0.01629	-0.02298	0	-0.00806	0	1e-05	0	-8e-05	-0.01617	-3e-05	-0.01587	0.00416	-0.06246	0.06153	0	0.00309	0	0.0935611	m	C40-H36-Hg2-I4-N8-O4	0.0627046	0.143149			94	2.22504	Polar	equal	Converged
YIPQAS_FSR	['11']	[29]	[1]	[1, 1, 1, 1]	[29 29 29 29]	vasp	[0.855]	-3e-05	-2e-05	-3e-05	-0.0124	-2e-05	-0.02771	-0.0622	-0.03875	0.01449	0	-0.05613	0	5e-05	2e-05	5e-05	-0.007	3e-05	-0.00514	0.0934395	2	Cu4-H20-C28-S2-I4-N4-O2	0.072242	0.0606481			64	2.66602	Polar	equal	Converged
KEYPAG_FSR	['12']	[30]	[2]	[2, 2]	[30 30]	vasp	[2.287]	0.03381	0.03148	0.0467	0	0.03192	0	2e-05	-3e-05	-5e-05	-0.01562	7e-05	0.05753	0.0092	-0.03828	0.06387	0	0.0251	0	0.093399	m	C36-H28-N4-O10-Zn2	0.117068	0.17595	['[OH2][Zn]']	['[O-]C(=O)c1c[nH]c2c1cccc2']	80	1.66651	Polar	equal	Converged
LEHHIR_FSR	['12']	[48]	[2]	[2, 2]	[48 48]	vasp	[2.739]	1e-05	0	0	-0.00755	0	0.05989	-0.08502	-0.02205	0.02092	0	0.02373	0	0	0	-1e-05	-0.01285	0	0.0249	0.0933561	2	Cd2-H30-C38-Br2-N4-O10	0.0288452	0.0899667	['[OH2][Cd]']	['[O-]C(=O)Cc1c(Br)cccc1C(=O)[O-]', 'n1ccc(cc1)c1ccncc1']	86	1.89013	Polar	equal	Converged
MOYPIA_FSR	['12']	[30]	[2]	[2, 2]	[30 30]	vasp	[2.302]	-0.07332	-0.04313	0.0028	0	-0.0203	0	-0.00059	-0.0002	0.00012	-0.02215	-0.00043	0.01693	-0.04075	0.00136	-0.00491	0	0.01746	0	0.0929654	m	C62-H56-N4-O8-Zn2	0.0370693	0.1147	['[Zn]']	['CCCC1(CCC)c2cc(ccc2-c2c1cc(cc2)C(=O)[O-])C(=O)[O-]']	132	1.48453	Polar	equal	Converged
RABNEP_FSR	['12']	[30]	[2]	[2, 2]	[30 30]	vasp	[2.542]	0.01564	0.01834	0.00106	0	0.0087	0	3e-05	-0.0001	0.0001	0.00316	6e-05	0.01806	-0.04158	-0.00199	-0.08188	0	-0.0092	0	0.0928086	m	C28-H20-N12-O8-Zn2	0.0428123	0.123638	['[Zn]']	['[O-]C(=O)C(=O)[O-]']	70	1.6628	Polar	equal	Converged
AXUVUL_FSR	['15']	[51]	[3]	[3]	[51 51 51 51]	vasp	[3.672]	0.00016	8e-05	-4e-05	0.02124	0	0	-1e-05	-7e-05	8e-05	0	0.09275	0	-1e-05	-2e-05	-1e-05	0	0	0.02992	0.0927501	222	Sb4-H52-C24-N4-O8-F12	0.05153	0.0412201			104	2.01169	Non-polar	equal	Converged
LIFNAR_FSR	['12']	[30]	[2]	[2, 2]	[30 30]	vasp	[2.085]	0.06688	0.06364	0.00084	0	0.00224	0	9e-05	0.00018	8e-05	0.00651	-0.00012	0.05897	0.0022	-0.00588	-0.07721	0	-0.00933	0	0.0925647	m	C46-H34-N6-O8-Zn2	0.0514451	0.10475	['[Zn]']	['[O-]C(=O)c1ccc(cc1)Cc1ccc(cc1)C(=O)[O-]']	96	1.44514	Polar	equal	Converged
PANREC_FSR	['12']	[30]	[2]	[2, 2]	[30 30]	vasp	[2.004]	5e-05	-2e-05	-0.00012	0.00319	-8e-05	-0.02357	0.017	-0.03655	-0.06811	0	0.04773	0	0	0	1e-05	-0.0427	-1e-05	0.02944	0.0924231	2	Zn2-H18-C28-N2-O6	0.0697285	0.121754	['[Zn]']	['[O]c1ccccc1C=Nc1ccccc1C(=O)[O-]']	56	1.56259	Polar	equal	Converged
GIRGEV_FSR	['12']	[48]	[2]	[2, 2, 2, 2]	[48 48 48 48]	vasp	[2.297]	0	-4e-05	-1e-05	0	-0.00571	0	-2e-05	1e-05	1e-05	0.0122	0	0	-0.04715	0.07742	0.01798	0	0	0	0.0924135	mm2	Cd4-H16-C12-Br8-N8	0.02624	0.0841543			48	3.18313	Polar	equal	Converged
YOTDUH_FSR	['1']	[11]	[1]	[1, 1]	[11 11]	vasp	[1.272]	8e-05	2e-05	8e-05	-0.02224	-2e-05	0.0213	0.06042	-0.02011	-0.03917	0	-0.05421	0	2e-05	7e-05	2e-05	-0.05303	-6e-05	-0.01499	0.0923472	2	C14-Cl2-H20-N2-Na2-O7-S2	0.0801993	0.0404495	['O', '[Na]']	['Cl[N]S(=O)(=O)c1ccccc1C']	49	1.66467	Polar	equal	Converged
TAPREK_FSR	['12']	[30]	[2]	[2, 2]	[30 30]	vasp	[2.341]	1e-05	-1e-05	0.00017	0.04311	0	-0.03931	0.03093	-0.06407	0.05467	0	0.02144	0	-5e-05	0.00027	-8e-05	-0.01762	-4e-05	-0.02808	0.0922508	2	Zn2-H28-C28-O14	0.0525884	0.0948533	['[OH2][Zn][OH2]']	['CC(C(=O)[O-])Oc1ccc2c(c1)ccc(c2)C(=O)[O-]']	72	1.72317	Polar	equal	Converged
EDABAO_FSR	['12']	[48]	[2]	[2, 2, 2, 2]	[48 48 48 48]	vasp	[2.336]	0	0	0	0	0.02774	0	-1e-05	2e-05	0	-0.02704	0	0	-0.04035	-0.07657	-0.03192	0	0	0	0.0922495	mm2	Cd4-H16-C24-I4-N4-O8	0.0535564	0.0993716	['[Cd]I']	['[O-]C(=O)c1ccccn1']	60	2.92441	Polar	equal	Converged
BODXOK_FSR	['12']	[48]	[2]	[2, 2]	[48 48]	vasp	[2.406]	0.00057	0.00059	0.00073	0	9e-05	0	-0.00017	-0.0001	-0.00025	-0.0187	0	0	0.0669	0.02718	-0.05688	0	0	0	0.0919223	mm2	C44-Cd2-H36-N8-O8	0.0739274	0.161682	['[Cd]']	['[O-]C(=O)Cc1ccc(cc1)CC(=O)[O-]', 'c1cc(cc(c1)c1[nH]cnc1)c1[nH]cnc1']	98	1.69695	Polar	equal	Converged
CEBFUL01_FSR	['3']	[39]	[3]	[3, 3, 3, 3]	[39 39 39 39]	vasp	[3.774]	0.05481	-0.02999	0.00042	0	0.03193	0	0	1e-05	0	-0.00082	0	-0.03279	0.059	-0.02329	0.01417	0	-0.00339	0	0.0917869	m	C24-H40-O26-Y4	0.0861906	0.0638113	['[OH2][Y]', '[Y]']	['[O-]C(=O)C']	94	1.88159	Polar	equal	Converged
KEKRIE_FSR	['2']	[20]	[2]	[2, 2]	[20 20]	vasp	[3.069]	-0.00461	-0.01151	-0.04045	0	0.04171	0	-0.00016	-5e-05	-0.00017	-0.03655	5e-05	0.04726	-0.00587	-0.05239	-0.05853	0	0.00546	0	0.0915408	m	C40-Ca2-H44-N8-O16	0.042064	0.111295	['[Ca]']	['[O-]C(=O)c1cc([N][N]c2ccc(c(c2)C(=O)[O-])O)ccc1O']	110	1.43423	Polar	equal	Converged
QUVGUK_FSR	['12', '9']	[48, 27]	[2, 3]	[2, 3, 3]	[48 27 27]	vasp	[2.778, 1.361]	-5e-05	4e-05	0	-0.08627	0.03048	-1e-05	2e-05	0	0	-0.03037	-0.08606	1e-05	0.05709	-0.05706	1e-05	0	0	-0.01942	0.0914975	-4	Cd1-Co2-H16-C12-N4-O16	0.0731094	0.0751554	['[Cd]', '[Co]']	['[O-]C(=O)C(=O)[O-]']	51	1.9453	Non-polar	equal	Converged
INEYIK_FSR	['2']	[20]	[2]	[2, 2]	[20 20]	vasp	[2.477]	-7e-05	7e-05	1e-05	-0.00997	-3e-05	0.0188	-0.00745	-0.07946	-0.0385	0	-0.02249	0	-5e-05	-3e-05	-3e-05	-0.02846	0	-0.0043	0.0914191	2	Ca2-H44-C36-O16	0.0481984	0.131856	['[OH2][Ca][OH2]']	['COc1ccc(cc1)CC(=O)[O-]']	98	1.44762	Polar	equal	Converged
MAWVAK_FSR	['12']	[30]	[2]	[2, 2, 2, 2]	[30 30 30 30]	vasp	[2.172]	-6e-05	-1e-05	-3e-05	0.02475	-0.00309	-2e-05	-1e-05	-5e-05	1e-05	-0.00304	-0.02479	-1e-05	-0.04715	-0.04715	-0.06227	0	0	0	0.0912349	4	Zn4-H56-C44-N8-O16	0.0235848	0.0920691	['[Zn]']	['CC(C(=O)[O-])NCc1ccncc1']	128	1.30708	Polar	equal	Converged
OHUXAS_FSR	['12']	[30]	[2]	[2, 2, 2, 2]	[30 30 30 30]	vasp	[2.457]	0	0	0	0	0.02008	0	0	1e-05	0	0.02205	0	0	-0.01128	0.00692	0.08995	0	0	0	0.0909182	mm2	Zn4-H32-C40-N24-O16	0.164198	0.241304	['[Zn]']	['[O-]C(=O)c1nccnc1N']	116	1.88389	Polar	equal	Converged
YEPFEF_FSR	['12']	[48]	[2]	[2, 2]	[48 48]	vasp	[2.463]	0.00135	0.0015	-0.00015	0.01544	0.00012	0.01987	0.03765	0.07082	0.03023	0	0.02976	0	-0.00048	-0.00059	6e-05	0.02078	-6e-05	0.04162	0.0907521	2	C30-Cd2-H26-N6-O12	0.146879	0.188635	['[OH2][Cd]']	['O=C(c1cccnc1)Nc1ccncc1', '[O-]C(=O)C=CC(=O)[O-]']	76	1.73267	Polar	equal	Converged
KOQZAT_FSR	['12']	[30]	[2]	[2, 2, 2, 2]	[30 30 30 30]	vasp	[2.047]	-1e-05	0	0	-0.09075	0	0	-3e-05	2e-05	0	0	0.09075	0	0	0	0	0	0	0	0.09075	422	Zn4-B16-H40-C12-N8-O28	0.02508	0.11583	['[Zn]']	['NCCCN', 'O1B2O[B]34OB5O[B]67OB8O[B]9%10OB%11O[B]%121OB1O[B](O2)(O%12)OB(O3)O[B](O4)(O5)OB(O6)O[B](O7)(O8)OB(O9)O[B](O%11)(O1)O%10']	108	2.09223	Non-polar	equal	Converged
MNMLTH_FSR	['7']	[25]	[2]	[2, 2, 2, 2]	[25 25 25 25]	vasp	[2.242]	9e-05	9e-05	0.00017	-0.01568	0	0	-1e-05	-3e-05	-2e-05	0	0.09071	0	2e-05	3e-05	8e-05	0	0	0.02766	0.09071	222	Mn4-H32-C16-O28	0.04157	0.09188	['[OH2][Mn]']	['[O-]C(=O)CC(C(=O)[O-])O']	80	1.79852	Non-polar	equal	Converged
VIWHOA_FSR	['12']	[30]	[2]	[2, 2, 2]	[30 30 30]	vasp	[2.274]	0.05567	0.00606	-0.01877	0.00768	0.01303	-0.00628	0.01476	0.01341	0.00127	0.01461	-0.00525	0.03369	0.00801	-0.00437	-0.019	-0.01706	0.0818	-0.00407	0.0903696	1	Zn3-H26-C40-N2-O16	0.0423169	0.0948462	['[OH2][Zn][OH2]', '[Zn]']	['[O-]C(=O)c1cc(ccc1C(=O)[O-])Oc1ccccc1C(=O)[O-]', 'n1ccc(cc1)c1ccncc1']	87	1.74363	Polar	equal	Converged
NECCUU_FSR	['11']	[29]	[1]	[1, 1]	[29 29]	vasp	[0.111]	1e-05	2e-05	1e-05	-0.0087	0	-0.00305	-0.04376	-0.07786	-0.01091	0	-0.00734	0	2e-05	0	2e-05	0.0098	0	-0.0264	0.0902775	2	C27-Cu2-H22-N2-P2	0.102198	0.0694814	['[Cu]']	['[C]#N', 'c1ccc(cc1)P(c1ccccc1)CP(c1ccccc1)c1ccccc1']	55	1.56247	Polar	equal	Converged
JOMWUF_FSR	['12']	[30]	[2]	[2, 2]	[30 30]	vasp	[2.268]	0.00287	0.06105	-0.01337	0	0.06134	0	0.00012	0.00015	0.0002	0.00608	0.00012	-0.01231	0.04197	0.01196	0.06565	0	-0.0141	0	0.090211	m	C76-H52-N4-O8-Zn2	0.0439856	0.121272	['[Zn]']	['n1ccc(cc1)c1ccncc1']	142	1.50623	Polar	equal	Converged
HEFXIZ_FSR	['1']	[3]	[1]	[1, 1]	[3 3]	vasp	[1.137]	5e-05	-6e-05	0.00014	0.0328	1e-05	0.03366	0.02303	0.06633	-0.0558	0	0.00664	0	1e-05	-7e-05	0.00019	-0.03002	6e-05	0.0111	0.0899323	2	Li2-H14-C8-N4-O6	0.144361	0.216385	['[Li]']	['[O-]C(=O)CNC(=O)CN']	34	1.41011	Polar	equal	Converged
LOTTEW01_FSR	['2']	[12]	[2]	[2, 2, 2, 2, 2, 2, 2, 2, 2]	[12 12 12 12 12 12 12 12 12]	vasp	[2.427]	-0.02833	0.02847	0.00027	0.01125	-0.0115	0.05549	0.05515	-0.05633	0.00017	-0.01143	-0.01117	0.02839	0.00965	0.00965	-0.04036	0	0	0	0.0899105	3	Mg9-H36-C63-O45	0.0652524	0.149894	['[Mg]']	['[O-]C(=O)c1cc(O)c(c(c1)O)[O]']	153	1.41676	Polar	equal	Converged
POYRUR_FSR	['12']	[30]	[2]	[2, 2, 2, 2]	[30 30 30 30]	vasp	[2.428]	-4e-05	0	5e-05	0.07807	0	0	0	0	1e-05	0	0.08989	0	0	0	0	0	0	0.05537	0.08989	222	Zn4-H32-C24-O32	0.06973	0.0759	['[OH2][Zn]']	['[O-]C(=O)CC(C(=O)[O-])(CC(=O)O)O']	92	2.2069	Non-polar	equal	Converged
OHETOL_FSR	['12']	[48]	[2]	[2, 2]	[48 48]	vasp	[2.324]	-0.06756	0.03708	0.00907	0	-0.03006	0	-0.00012	-1e-05	-0.00011	-0.03101	-3e-05	-0.00863	-0.04795	-0.06307	0.0044	0	-0.01379	0	0.0898821	m	C36-Cd2-H34-N10-O10	0.0430053	0.101302	['[OH2][Cd]']	['[O-]C(=O)CCC(=O)[O-]']	92	1.62996	Polar	equal	Converged
NAWYOA_FSR	['1']	[11]	[1]	[1, 1, 1, 1]	[11 11 11 11]	vasp	[1.2]	2e-05	-5e-05	-7e-05	-0.05086	0	0	-5e-05	-2e-05	0.00013	0	0.00564	0	1e-05	-2e-05	-6e-05	0	0	0.08967	0.08967	222	Na4-H44-C16-N72-O12	0.01286	0.08359	['O', '[Na]']		148	1.7664	Non-polar	equal	Converged
NOQDEE_FSR	['12']	[30]	[2]	[2, 2]	[30 30]	vasp	[2.1]	0.07365	0.00081	-0.03557	0	-0.02382	0	-1e-05	-1e-05	-2e-05	-0.03611	0	0.02915	0.02737	-0.03208	-0.01696	0	0.02196	0	0.0896554	m	C50-H36-N12-O12-S2-Zn2	0.0487205	0.101203	['[Zn]']	['O=C(c1cccc(n1)C(=O)Nc1cccnc1)Nc1cccnc1', '[O-]C(=O)CSc1ncccc1C(=O)[O-]']	114	1.51496	Polar	equal	Converged
LECYAW_FSR	['12']	[80]	[2]	[2, 2]	[80 80]	vasp	[1.812]	0.06634	0.01649	-0.03041	0	-0.0188	0	-9e-05	-9e-05	-5e-05	-0.00199	0.0001	-0.05134	-0.00099	-0.0215	0.0695	0	-0.01017	0	0.0896262	m	C40-H36-Hg2-I4-N8-O4	0.0724817	0.116349			94	2.206	Polar	equal	Converged
XEJWUG_FSR	['9']	[27]	[2]	[2, 2, 2, 2]	[27 27 27 27]	vasp	[1.74]	-0.00097	-0.00038	-0.00083	0.05644	0	0	-1e-05	0.00019	-5e-05	0	0.08902	0	0.00016	0.00056	0	0	0	0.01307	0.0890202	222	Co4-H32-C36-N4-O20	0.04477	0.0541604	['[Co]']	['[O-]C(=O)CC(C(=O)[O-])O', 'n1ccc(cc1)c1ccncc1']	96	1.57172	Non-polar	equal	Converged
UNIRUF03_FSR	['1']	[3]	[1]	[1, 1, 1, 1]	[3 3 3 3]	vasp	[1.121]	-0.0001	-5e-05	-8e-05	0.05143	1e-05	0.05398	-0.00431	0.02648	0.02884	0	0.00397	0	-6e-05	-4e-05	-7e-05	-0.04374	1e-05	-0.02445	0.088972	2	C8-H8-Li4-O12	0.0307012	0.0975311			32	1.82503	Polar	equal	Converged
XUQQOP_FSR	['12', '1', '4']	[48, 19, 40]	[2, 1, 4]	[2, 1, 1, 4]	[48 19 19 40]	vasp	[2.74, 1.274, 4.873]	0.00039	-0.00034	0.00012	0.03583	0.03961	5e-05	-0.00044	0.00027	-0.00018	-0.03953	0.03584	-1e-05	0.06239	-0.0624	-2e-05	0	0	0.00305	0.0882972	-4	C8-Cd1-H16-K2-O24-Zr1	0.0250395	0.0632626	['[Cd]', '[OH2][K]([OH2])([OH2])[OH2]', '[Zr]']	['[O-]C(=O)C(=O)[O-]']	52	2.27344	Non-polar	equal	Converged
SEYVIC01_FSR	['12']	[30]	[2]	[2, 2]	[30 30]	vasp	[2.073]	0.03915	-0.01931	-0.04528	0	0.05367	0	-6e-05	2e-05	-6e-05	-0.03582	0	-0.00997	0.0296	-0.06831	0.03777	0	0.0016	0	0.0880919	m	C20-H20-N8-O8-Zn2	0.161944	0.235284	['[Zn]']	['[O-]C(=O)Cn1cncc1']	58	1.73034	Polar	equal	Converged
NOQHUY_FSR	['12']	[30]	[2]	[2, 2]	[30 30]	vasp	[2.185]	-0.0686	0.00637	-0.02537	0	0.01615	0	5e-05	-9e-05	3e-05	-0.00339	6e-05	0.00844	0.02411	-0.00964	0.0532	0	0.00774	0	0.0879054	m	C44-H36-N8-O8-Zn2	0.0545276	0.0729481	['[Zn]']	['[O-]C(=O)c1ccccc1C(=O)[O-]', 'c1ncn(c1)Cc1ccc(cc1)Cn1cncc1']	98	1.54772	Polar	equal	Converged
GIKQEY_FSR	['12']	[48]	[2]	[2, 2]	[48 48]	vasp	[2.284]	0.00019	7e-05	5e-05	-0.01205	-0.00014	-0.04086	0.00094	0.08518	-0.00334	0	0.01944	0	1e-05	6e-05	0.00014	0.02918	4e-05	0.03019	0.0874391	2	Cd2-H52-C44-N12-O8	0.0221302	0.101191	['[Cd]']	['[O-]C(=O)C1CCC(C1(C)C)(C)C(=O)[O-]', 'n1ncn(c1)Cc1ccc(cc1)Cn1cnnc1']	118	1.59371	Polar	equal	Converged
UNISUH_FSR	['12']	[30]	[2]	[2, 2, 2, 2, 2]	[30 30 30 30 30]	vasp	[2.49]	0.00072	0.00027	0.00026	0.06045	0.00017	-0.00552	0.03642	0.04572	0.04729	0	0.04428	0	-0.00016	-1e-05	7e-05	-0.01219	-6e-05	0.00946	0.0872623	2	C26-H20-O14-P2-Zn5	0.0857675	0.11833	['[OH]', '[Zn]']	['[O-]C(=O)c1ccc(cc1)c1ccc(cc1)P(=O)([O])[O]']	67	2.342	Polar	equal	Converged
LUWVUU_FSR	['12']	[30]	[2]	[2, 2, 2, 2]	[30 30 30 30]	vasp	[2.166]	-7e-05	4e-05	1e-05	0	0.02438	0	0	0	-1e-05	-0.0549	0	0	0.02547	-0.01588	0.0819	0	0	0	0.0872267	mm2	Zn4-H40-C48-N8-O16	0.159547	0.0940012	['[Zn]']	['[O-]C(=O)c1ccccc1C(=O)[O-]']	116	1.70348	Polar	equal	Converged
RATVEP_FSR	['2']	[12]	[2]	[2, 2, 2, 2]	[12 12 12 12]	vasp	[2.308]	0.00015	-4e-05	-0.00074	0	-0.05404	0	0	0	1e-05	-0.08713	0	0	-0.01522	-0.02382	-0.07979	0	0	0	0.08713	mm2	Mg4-H28-C40-N12-O20	0.0621384	0.118344	['[OH2][Mg]']	['[O-]C(=O)c1[nH]c(nc1C(=O)[O-])c1ccncc1']	104	1.48344	Polar	equal	Converged
JIPYOZ_FSR	['14']	[50]	[4]	[4, 4, 4, 4]	[50 50 50 50]	vasp	[2.709]	-1e-05	0	1e-05	-0.04422	0	-0.00788	0.08221	-0.02035	-0.01282	0	-0.01585	0	0	0	0	-0.00515	0	-0.01105	0.0871102	2	Sn4-P2-H64-C30-N2-O8	0.030629	0.083791	['[Sn]']	['[Sn]OP(=O)(CNC(c1ccccc1)C)[O]']	110	1.66152	Polar	equal	Converged
JIPYEP_FSR	['14']	[50]	[4]	[4, 4, 4, 4]	[50 50 50 50]	vasp	[2.711]	0	0	1e-05	0.0352	0	0.06446	-0.01843	0.00939	0.00856	0	0.02959	0	0	0	0	0.0578	0	0.01432	0.086998	2	Sn4-P2-H64-C30-N2-O8	0.0226756	0.0814986	['[Sn]']	['[Sn]OP(=O)(CNC(c1ccccc1)C)[O]']	110	1.66111	Polar	equal	Converged
ZASJAG_FSR	['12']	[48]	[2]	[2, 2]	[48 48]	vasp	[2.669]	0.00713	0.01294	0.00382	0	0.00326	0	-9e-05	-9e-05	-8e-05	-0.04023	-3e-05	-0.02999	0.04217	0.02304	0.06582	0	0.02812	0	0.0869112	m	C48-Cd2-H28-N4-O8	0.10455	0.144108	['[Cd]']	['[O-]C(=O)c1ccc(cc1)c1cc(cc(n1)c1ccc(cc1)C(=O)[O-])c1ccncc1']	90	1.20609	Polar	equal	Converged
BUBSOI_FSR	['14']	[50]	[4]	[4, 4]	[50 50]	vasp	[3.228]	0	1e-05	0	-0.00409	0	0.04813	0.05324	0.06056	-0.02442	0	0.02111	0	1e-05	2e-05	-1e-05	0.00438	0	0.00945	0.0868561	2	Sn2-H52-C54-S2-N4-O8	0.0518134	0.112582	['[Sn]']	['O=C1CCC(N1)C(=O)N1CSCC1C(=O)[O-]']	122	1.59539	Polar	equal	Converged
EYUZUU01_FSR	['12']	[30]	[2]	[2, 2, 2, 2]	[30 30 30 30]	vasp	[2.042]	-1e-05	3e-05	2e-05	0	0.03863	0	0.00012	0.00012	6e-05	-0.03906	0	0	0.06753	-0.04449	0.03155	0	0	0	0.0868048	mm2	Zn4-H20-C16-N12-O8	0.131252	0.189869	['[Zn]']	['[N]1C=NN=C1', '[O-]C(=O)C']	60	1.99401	Polar	equal	Converged
OPISAJ_FSR	['2']	[56]	[2]	[2, 2]	[56 56]	vasp	[2.974]	-1e-05	1e-05	8e-05	0.00494	2e-05	-0.03264	0.02914	-0.0621	-0.05082	0	-0.01366	0	-5e-05	-3e-05	-1e-05	-0.01803	-3e-05	-0.02554	0.0864571	2	Ba2-H32-C32-N20-O12	0.0250894	0.0903707	['O', '[Ba]']	['[O-]C(=O)CN1[N]N=C([N]1)c1ccncc1', '[O-]C(=O)Cn1nnc(n1)c1ccncc1']	98	1.83995	Polar	equal	Converged
OKODAV_FSR	['12']	[30]	[2]	[2, 2]	[30 30]	vasp	[2.343]	3e-05	1e-05	0	-0.083	3e-05	-0.01927	-0.00038	-0.01458	0.01448	0	0.00293	0	-1e-05	0	3e-05	0.01945	-3e-05	-0.02382	0.0864007	2	Zn2-H32-C20-N20	0.0392086	0.0472603	['[Zn]']	['C1CNC(C1)C1=NN=N[N]1']	74	1.68734	Polar	equal	Converged
BIWTOR_FSR	['12']	[48]	[2]	[2, 2, 2, 2]	[48 48 48 48]	vasp	[2.364]	0	0	0	0	0.00627	0	-2e-05	1e-05	-1e-05	-0.08637	0	0	-0.02705	0.00552	-0.07599	0	0	0	0.08637	mm2	Cd4-H40-C28-Se8-S4-N16	0.07573	0.106692	['[Cd]']	['[Se]C#N']	100	2.39947	Polar	equal	Converged
FIPXEJ_FSR	['12']	[30]	[2]	[2, 2, 2, 2]	[30 30 30 30]	vasp	[1.961]	1e-05	0	2e-05	-0.02352	0	-0.0469	-0.02607	-0.07962	-0.01173	0	-0.01737	0	1e-05	0	1e-05	-0.04001	0	0.01381	0.0863614	2	Zn4-H48-C36-N16-O12	0.110754	0.0924819			116	1.36422	Polar	equal	Converged
FEQSOK_FSR	['12']	[48]	[2]	[2, 2]	[48 48]	vasp	[2.954]	0.00015	-8e-05	7e-05	-0.08561	0	0	0.00011	-0.00011	-3e-05	0	0.08572	0	0	0	0	0	0	0	0.0857201	422	C52-Cd2-H36-N4-O16	0.00975	0.0759702	['[Cd]']	['OC(=O)c1ccccc1C(=O)[O-]', 'n1ccc(cc1)c1ccncc1']	110	1.71285	Non-polar	equal	Converged
KEXFAV_FSR	['11', '6']	[29, 74]	[1, 6]	[1, 1, 1, 1, 1, 1, 1, 1, 6, 6]	[29 29 29 29 29 29 29 29 74 74]	vasp	[0.437, 1.643]	0	0	0	0	-0.04889	0	0	0	0	0.06381	0	0	0.0009	0.08035	0.02904	0	0	0	0.0854415	mm2	C60-Cu8-H48-I4-N12-S14-W2	0.0454886	0.0704796	['I[Cu]1[S]2[Cu]3[W]4562[S]1[Cu]4[S]6[Cu]([S]35)I']	['n1ccc(cc1)Sc1ccncc1']	148	1.96012	Polar	equal	Converged
EDAWOY_FSR	['11']	[29]	[2]	[2, 2, 2, 2]	[29 29 29 29]	vasp	[1.73]	0	-1e-05	-2e-05	0.08514	0	0	2e-05	-1e-05	1e-05	0	0.06854	0	0	-1e-05	1e-05	0	0	-0.00092	0.08514	222	Cu4-P4-H64-C32-N4-O24	0.0565	0.05469	['[Cu]']	['[O-]C(=O)C1CCCN(C1)CP(=O)(O)[O]', '[O-]C(=O)C1CCCN(C1)CP(=O)([O])O']	132	1.88594	Non-polar	equal	Converged
VOZQEI03_FSR	['11']	[29]	[2]	[2, 2]	[29 29]	vasp	[1.373]	3e-05	1e-05	3e-05	-0.00987	1e-05	0.03702	0.04565	0.03966	0.01857	0	0.011	0	1e-05	0	2e-05	0.0818	0	0.02345	0.0850987	2	Cu2-H34-C30-N10-O2	0.0677958	0.0957116			78	1.61651	Polar	equal	Converged
WEMJUU_FSR	['1']	[55]	[1]	[1, 1]	[55 55]	vasp	[1.353]	-1e-05	1e-05	0	0	-0.08504	0	2e-05	-5e-05	-7e-05	-0.01088	0	0	0.00178	0.0348	-0.03345	0	0	0	0.08504	mm2	Cs2-H26-C14-N4-O14	0.0682356	0.09377	['[OH2][Cs]([OH2])[OH2]']	['[O-]C(=O)CN1C=CN([CH]1)CC(=O)[O-]']	60	1.968	Polar	equal	Converged
PORBUU_FSR	['12', '14']	[30, 50]	[2, 4]	[2, 2, 2, 2, 4, 4, 4, 4]	[30 30 30 30 50 50 50 50]	vasp	[1.744, 2.411]	0	0	0	0.00794	0	0.00449	-0.02543	-0.00087	-0.03985	0	0.07063	0	-1e-05	1e-05	0	0.01301	0	0.07256	0.0849945	2	Zn4-Sn4-H64-C24-Se14-N12	0.121815	0.195468	['[Se]', '[Sn]', '[Zn]']		122	2.66312	Polar	equal	Converged
RIFTOQ_FSR	['12']	[48]	[2]	[2, 2]	[48 48]	vasp	[2.339]	8e-05	7e-05	5e-05	-0.02483	7e-05	0.04076	0.05501	0.01275	0.04662	0	-0.04273	0	-1e-05	-1e-05	-1e-05	0.01037	-1e-05	-0.00252	0.0847817	2	Cd2-H26-C22-S2-N2-O14	0.143126	0.196149	['[OH2][Cd]']	['[O-]C(=O)C(NS(=O)(=O)c1ccccc1)CCC(=O)[O-]']	68	2.03702	Polar	equal	Converged
EGEBEY_FSR	['12']	[48]	[2]	[2, 2, 2, 2]	[48 48 48 48]	vasp	[2.426]	-7e-05	-0.00011	-0.00023	0.08462	0	0	0	0	0	0	-0.02434	0	0	0	0	0	0	0.0564	0.0846204	222	Cd4-H20-C12-S4-N4-O8	0.0786	0.10294	['[Cd]']	['[O-]C(=O)C(C[S])N']	52	2.9909	Non-polar	equal	Converged
TAKREF_FSR	['12']	[48]	[2]	[2, 2]	[48 48]	vasp	[2.273]	1e-05	-4e-05	-3e-05	0.05126	0	0.06693	-0.01863	0.00476	0.00626	0	0.01934	0	1e-05	-1e-05	-1e-05	-0.00322	0	-0.00625	0.0845879	2	Cd2-H36-C20-N8-O12	0.0182399	0.0699052	['[Cd]']	['NC(=O)CCC(C(=O)[O-])N']	78	2.00707	Polar	equal	Converged
GOSFUP_FSR	['11']	[29]	[1]	[1, 1, 1, 1, 1, 1, 1, 1, 1, 1, 1, 1]	[29 29 29 29 29 29 29 29 29 29 29 29]	vasp	[0.637]	-6e-05	-2e-05	-2e-05	0	0.08041	0	-0.00026	-0.00022	-6e-05	0.0441	0	0	0.00502	0.04819	0.06882	0	0	0	0.0841649	mm2	Cu12-H40-C56-N16-Cl12	0.136152	0.213379			136	2.26923	Polar	equal	Converged
YIZVEJ_FSR	['15']	[83]	[3]	[3, 3]	[83 83]	vasp	[4.907]	0.00016	0.00057	2e-05	-0.02544	2e-05	-0.06823	0.0151	-0.0532	0.04202	0	-0.01115	0	0	0.00018	-3e-05	0.03682	-2e-05	-0.0492	0.0841298	2	Bi2-H24-C36-N6-O12	0.0521279	0.116035			80	2.2544	Polar	equal	Converged
HOYMOZ_FSR	['12']	[80]	[2]	[2, 2, 2, 2]	[80 80 80 80]	vasp	[2.207]	-1e-05	-1e-05	-1e-05	0	-0.08408	0	2e-05	-5e-05	1e-05	0.0091	0	0	0.04052	-0.00625	0.00992	0	0	0	0.08408	mm2	Hg4-H36-C48-I8-Br4-N8	0.062	0.12478			108	3.05765	Polar	equal	Converged
UFOCID_FSR	['3']	[39]	[3]	[3, 3]	[39 39]	vasp	[3.798]	0.0523	-0.05232	0	0.03949	0	0	0.0001	-8e-05	4e-05	0	-0.03944	-0.05235	-6e-05	-6e-05	0.00018	0	0	0	0.083858	32	C9-H18-O24-Y2	0.0948375	0.0444491	['[OH2][Y]([OH2])[OH2]']	['[O-]C(=O)C(C(=O)[O-])(O)O']	53	2.10453	Non-polar	equal	Converged
GEZSIQ_FSR	['12']	[48]	[2]	[2, 2, 2, 2]	[48 48 48 48]	vasp	[2.507]	2e-05	-1e-05	2e-05	0	-0.01731	0	-0.00059	0.00033	0.00048	0.02636	0	0	-0.01983	0.02768	0.07643	0	0	0	0.0836749	mm2	C28-Cd4-Cl4-H20-N24-S4	0.07422	0.0686986	['Cl[Cd]']	['[CH]1N[N]C(=N1)c1cnccn1']	84	2.13861	Polar	equal	Converged
LUHTEO_FSR	['1']	[19]	[1]	[1, 1]	[19 19]	vasp	[1.195]	-0.00681	0.03517	-0.00648	0	0.00424	0	-1e-05	0	0	0.03653	0	0.0124	0.05029	-0.03753	-0.04935	0	0.01609	0	0.0832044	m	K2-H50-C28-N4-O14	0.0975054	0.150901			98	1.36705	Polar	equal	Converged
LOSGOR01_FSR	['11']	[29]	[1]	[1, 1]	[29 29]	vasp	[0.282]	0	-1e-05	-1e-05	0.06258	0	-0.02026	0.06086	0.05332	-0.01529	0	0.01084	0	-1e-05	-1e-05	-1e-05	-0.03087	0	0.00634	0.0830557	2	Cu2-H12-C14-N10	0.0251109	0.0988974	['[Cu]']	['c1ccc(cn1)CC1=NN=N[N]1']	38	1.90972	Polar	equal	Converged
KAZQAG_FSR	['9', '1']	[27, 19]	[2, 1]	[2, 2, 1, 1]	[27 27 19 19]	vasp	[-0.038, 1.132]	-0.04926	0.02106	-0.00489	0	0.00425	0	1e-05	2e-05	1e-05	0.03383	0	-0.00367	-0.01823	0.00182	-0.07799	0	-0.00815	0	0.0830516	m	C48-Co2-H44-K2-N4-O6	0.108633	0.155461			106	1.49717	Polar	equal	Converged
MUDTAJ_FSR	['12']	[30]	[2]	[2, 2, 2, 2, 2, 2]	[30 30 30 30 30 30]	vasp	[2.131]	-0.00227	-0.00259	-0.00466	-0.00043	0.00445	0.00152	-7e-05	-0.00269	-0.00224	0.00504	0	0	0.01539	0.01539	0.07961	0	0	0	0.0827523	3m	C60-H30-N30-O12-Zn6	0.0338907	0.0782109	['[Zn]']	['C1=CN=C([N]1)C1=Nc2c([N]1)cncc2']	138	1.74585	Polar	equal	Converged
MOHMUT_FSR	['12']	[48]	[2]	[2, 2, 2, 2, 2, 2, 2, 2]	[48 48 48 48 48 48 48 48]	vasp	[2.401]	0.0004	-0.00029	1e-05	0	-0.08254	0	1e-05	6e-05	1e-05	0.08255	0	0	-0.02866	0.02868	3e-05	0	0	0	0.08255	-42m	C40-Cd8-Cl8-H24-N16-O16	0.0230517	0.0641	['Cl[Cd]', 'Cl[Cd]Cl', '[Cd]']	['[O-]C(=O)c1ncccn1']	112	2.32108	Non-polar	equal	Converged
JAHJEK_FSR	['12']	[30]	[2]	[2, 2]	[30 30]	vasp	[2.048]	0.0071	0.01153	-0.04273	0.00169	0.05374	-0.00391	-0.00941	-0.02649	-0.01943	-0.01083	0.01253	-0.02905	0.04258	0.04564	0.01311	-0.03041	-0.0141	0.00639	0.0824088	1	Zn2-H26-C42-N12	0.0708772	0.109667	['[Zn]']	['c1ccc2c(c1)N=C([N]2)C1=Nc2c([N]1)cccc2', 'c1ccc2c(c1)N=C([N]2)c1nc2c([nH]1)cccc2']	82	1.61033	Polar	equal	Converged
DOCGAG_FSR	['2']	[38]	[2]	[2, 2, 2]	[38 38 38]	vasp	[2.917]	0.01305	-0.01345	-4e-05	0.00576	-0.00304	-0.00539	-0.00525	0.00506	-6e-05	-0.00286	-0.00485	-0.01332	0.05802	0.05802	0.00477	0	0	0	0.0821918	3	Sr3-H33-C33-N3-O18	0.148497	0.149011	['[Sr]']	['[O-]C(=O)c1ccc(c(c1)O)C(=O)[O-]']	90	1.78102	Polar	equal	Converged
GUJTUB_FSR	['12']	[80]	[2]	[2, 2, 2, 2]	[80 80 80 80]	vasp	[1.63]	-0.00011	-1e-05	7e-05	0	0.00709	0	6e-05	8e-05	0.00025	0.01413	0	0	-0.02402	-0.00731	-0.07824	0	0	0	0.0821704	mm2	Hg4-H48-C24-N16	0.12612	0.0654344	['[Hg]']	['NCCCCN']	92	2.34947	Polar	equal	Converged
IHUZAO_FSR	['1']	[3]	[1]	[1, 1, 1, 1]	[3 3 3 3]	vasp	[1.195]	2e-05	-1e-05	7e-05	0.02247	0	0	0	0	0	0	0.06601	0	0	0	0	0	0	0.08196	0.08196	222	Li4-B4-H16-C16-N8-F16	0.03406	0.0479			64	1.63714	Non-polar	equal	Converged
WISZON_FSR	['12']	[30]	[2]	[2, 2, 2]	[30 30 30]	vasp	[2.092]	0.01884	-0.01878	0	-0.01281	0.04826	-0.0418	-0.04178	0.04179	-7e-05	0.04846	0.01301	-0.01885	0.00219	0.00219	-0.0045	0	0	0	0.0819019	3	Zn3-H33-C30-N3-O12	0.0525019	0.0735889	['[OH2][Zn]']	['[O-]C(=O)C(N=Cc1ccccc1[O])C']	81	1.5643	Polar	equal	Converged
PIHSAB_FSR	['2']	[12]	[2]	[2, 2]	[12 12]	vasp	[2.25]	-6e-05	-4e-05	3e-05	-0.07465	0	0	-5e-05	1e-05	-0.0001	0	0.05861	0	4e-05	2e-05	-2e-05	0	0	0.08186	0.08186	222	C8-H8-Mg2-O12	0.07206	0.13067			30	2.15542	Non-polar	equal	Converged
INEYEG_FSR	['2']	[20]	[2]	[2, 2]	[20 20]	vasp	[2.467]	-2e-05	-1e-05	0	0.01194	0	-0.03269	-0.0297	0.04936	-0.05669	0	0.01273	0	0	1e-05	1e-05	0.01398	0	-0.01861	0.0818188	2	Ca2-H32-C32-Cl4-O12	0.0465636	0.0718785	['[OH2][Ca][OH2]']	['[O-]C(=O)Cc1ccccc1Cl']	82	1.42061	Polar	equal	Converged
BOPCIT_FSR	['2']	[12]	[2]	[2]	[12]	vasp	[2.403]	0.00817	-0.03051	0.0338	-0.02702	0.04115	-0.02251	0.01484	-0.02235	0.00987	-0.02253	0.00404	-0.02782	0.04466	0.02644	0.01082	0.00074	0.00235	-0.01967	0.0817851	1	Mg1-H26-C30-N2-O10-F2	0.0325768	0.0836503			71	1.53421	Polar	equal	Converged
XEZZIL_FSR	['5', '12']	[23, 30]	[5, 2]	[5, 5, 5, 5, 5, 5, 2, 2]	[23 23 23 23 23 23 30 30]	vasp	[4.332, 2.309]	-0.0216	-0.03959	-0.01151	-0.00816	0.02403	-0.04092	0.00711	0.00796	-0.00455	0.01163	-0.02519	0.00307	0.03151	0.03204	0.03186	-0.01472	-0.0154	-0.00618	0.0816251	1	V6-Zn2-H22-C30-N6-O17	0.101476	0.116154	['[O]', '[V]', '[Zn]']		83	2.01512	Polar	equal	Converged
COVBOG_FSR	['12']	[48]	[2]	[2, 2]	[48 48]	vasp	[2.323]	-1e-05	0	0	-0.0268	0	0.01729	0.00177	-0.07343	0.03143	0	-0.01334	0	0	0	0	0.00616	0	-0.00408	0.0809994	2	Cd2-H38-C30-S2-N6-O14	0.0781897	0.144567	['[OH2][Cd]']	['[O-]C(=O)C(NS(=O)(=O)c1ccc(cc1)C)CCC(=O)[O-]']	92	1.81536	Polar	equal	Converged
GELVEZ01_FSR	['7']	[25]	[2]	[2, 2, 2, 2, 2, 2]	[25 25 25 25 25 25]	vasp	[2.519]	-0.04104	0.04108	-3e-05	-0.05635	0	0	-0.0009	0.00101	-0.00014	-0.00039	0.05784	0.04158	-1e-05	-1e-05	1e-05	0	0	0	0.0809567	32	Mn6-H24-C42-O30	0.0730267	0.137694	['[Mn]']	['[O-]C(=O)c1cc(O)c(c(c1)O)[O]']	102	1.43434	Non-polar	equal	Converged
LOXZUV01_FSR	['12']	[48]	[2]	[2, 2]	[48 48]	vasp	[2.395]	-0.00043	-0.00016	-0.00046	0.00292	0	0	0.0001	6e-05	7e-05	0	0.08095	0	0	1e-05	0	0	0	-0.00074	0.0809501	222	C24-Cd2-H24-O12	0.1985	0.21191	['[OH2][Cd][OH2]']	['[O-]C(=O)C=Cc1cccc(c1)C=CC(=O)[O-]']	62	2.00118	Non-polar	equal	Converged
HAZROP_FSR	['11', '6']	[29, 74]	[1, 6]	[1, 1, 1, 1, 1, 1, 1, 1, 1, 1, 1, 1, 6, 6]	[29 29 29 29 29 29 29 29 29 29 29 29 74 74]	vasp	[0.588, 1.903]	-0.00013	2e-05	-5e-05	0.06183	0	0	-0.00021	-0.00041	-0.00011	0	0.06187	0	-3e-05	-3e-05	-0.00015	0	0	0.08092	0.0809201	-42m	C40-Cu12-H40-I8-N8-S8-W2	0.02629	0.0881613			118	3.07408	Non-polar	equal	Converged
SEJSOQ_FSR	['7']	[25]	[2]	[2, 2, 2, 2]	[25 25 25 25]	vasp	[2.457]	-6e-05	-4e-05	-7e-05	-0.08087	0	0	8e-05	1e-05	9e-05	0	-0.03621	0	-4e-05	-1e-05	1e-05	0	0	0.03393	0.0808701	222	Mn4-H24-C16-O24	0.08606	0.083	['[OH2][Mn]']	['[O-]C(=O)CC(C(=O)[O-])O']	68	2.09953	Non-polar	equal	Converged
YERZIF_FSR	['14']	[50]	[4]	[4, 4]	[50 50]	vasp	[3.041]	0.01878	-0.00699	-0.01635	0	0.00147	0	-1e-05	-2e-05	0	-0.01328	1e-05	-0.0143	-0.03463	-0.06525	-0.01394	0	0.02905	0	0.0805979	m	C32-Cl4-H32-O4-Sn2	0.0553787	0.0994361	['[Sn]']	['ClC(C(=O)[O-])Cl']	74	1.70253	Polar	equal	Converged
ONIHUQ_FSR	['12']	[80]	[2]	[2, 2, 2, 2]	[80 80 80 80]	vasp	[2.385]	7e-05	1e-05	-1e-05	0	0.08051	0	3e-05	-0.00013	3e-05	-0.02271	0	0	-0.04051	-0.05323	-0.02764	0	0	0	0.0805101	mm2	Hg4-H44-C64-I8-Br4-N8	0.10788	0.18839			132	2.85462	Polar	equal	Converged
CUHMAM01_FSR	['11']	[29]	[2]	[2, 2]	[29 29]	vasp	[1.723]	1e-05	-1e-05	0	-0.05665	0	0.02567	-0.05366	0.03343	0.04682	0	0.01603	0	-1e-05	1e-05	1e-05	-0.04897	0	-0.00515	0.0802872	2	Cu2-H20-C16-O20	0.0894527	0.161909			58	1.83346	Polar	equal	Converged
NIGRIH_FSR	['1']	[3]	[1]	[1, 1]	[3 3]	vasp	[1.241]	-0.00013	3e-05	6e-05	0.00863	-1e-05	-0.05578	-0.03898	0.05906	0.01472	0	-0.03477	0	-0.00011	-4e-05	0.00015	-0.0457	-9e-05	-0.02109	0.0802072	2	Li2-H12-C20-N2-O8	0.148516	0.207541	['[Li]']	['[O-]C(=O)CN1C(=O)c2c(C1=O)cccc2']	44	1.47187	Polar	equal	Converged
POVFUE01_FSR	['12']	[30]	[2]	[2, 2, 2, 2, 2, 2]	[30 30 30 30 30 30]	vasp	[2.113]	-0.00147	-0.00277	-0.00483	0.00034	-0.05228	-0.032	-0.03425	0.03174	-0.00231	-0.05305	0	0	0.01066	0.01066	0.07794	0	0	0	0.0799912	3m	C54-H30-N30-Zn6	0.0443719	0.0704806	['[Zn]']	['C1=CN=C([N]1)C1=Nc2c([N]1)ccnc2']	120	1.4577	Polar	equal	Converged
VEFTAB_FSR	['11']	[29]	[1]	[1, 1]	[29 29]	vasp	[0.827]	0	0	-1e-05	0.01418	0	-0.00153	-0.03364	0.00329	0.03489	0	-0.06321	0	-1e-05	0	0	-0.02163	-1e-05	0.07135	0.0797201	2	Cu2-H16-C18-N4-Cl2	0.0757673	0.0876247			42	1.92167	Polar	equal	Converged
DIYTAI_FSR	['12']	[48]	[2]	[2, 2, 2, 2]	[48 48 48 48]	vasp	[2.611]	0	0	0	0.00245	0	-0.03242	-0.00478	0.06212	0.04155	0	0.02688	0	0	0	0	0.00505	0	-0.01714	0.0795656	2	Cd4-H48-C52-N8-O20	0.0797752	0.061069	['[Cd]', '[OH2][Cd][OH2]']	['C(Cn1cncc1)CCn1cncc1', '[O-]C(=O)c1cc(cc(c1)C(=O)[O-])c1cc(ccc1C(=O)[O-])C(=O)[O-]']	132	1.91544	Polar	equal	Converged
DUWWOH03_FSR	['14']	[50]	[4]	[4, 4, 4, 4, 4, 4, 4, 4]	[50 50 50 50 50 50 50 50]	vasp	[3.026]	-0.01261	-0.03133	0.01197	0	0.01723	0	1e-05	1e-05	-1e-05	0.01937	0	-0.00712	-0.01209	0.05657	0.05189	0	-0.00548	0	0.079505	m	Sn8-H72-C32-O20	0.0722249	0.0973063			132	2.1301	Polar	equal	Converged
ASALIP_FSR	['12']	[30]	[2]	[2, 2, 2, 2]	[30 30 30 30]	vasp	[2.272]	-1e-05	0	1e-05	0.02686	0	0	-1e-05	0	0	0	-0.03599	0	0	0	0	0	0	0.07913	0.07913	222	Zn4-H36-C32-N12-O20	0.05608	0.08248	['[Zn]']	['[O-]C(=O)CC(c1cccnc1)N']	104	1.89637	Non-polar	equal	Converged
IWIVIV02_FSR	['11']	[29]	[1]	[1, 1, 1, 1]	[29 29 29 29]	vasp	[0.076]	-0.00256	-0.0019	-0.00184	-0.07872	0	0	-0.00149	-0.00359	-0.00431	0	0.04984	0	0.00011	-1e-05	-3e-05	0	0	-0.05007	0.0788066	222	Cu4-H4-C8-N16-O8	0.11958	0.115516	['[Cu]']	['O=N(=O)C1=NN=C[N]1']	40	2.46277	Non-polar	equal	Converged
DEMMIS_FSR	['1']	[11]	[1]	[1, 1, 1, 1]	[11 11 11 11]	vasp	[1.155]	2e-05	1e-05	2e-05	0	0.03285	0	0	2e-05	0	-0.03484	0	0	-0.07388	-0.01663	0.01985	0	0	0	0.0782869	mm2	Na4-H32-C40-N8-Cl4-O16	0.0907561	0.15122	['[Na]']	['[O]Cl.[O].[O]']	104	1.59572	Polar	equal	Converged
ONINOQ_FSR	['12']	[80]	[2]	[2, 2, 2, 2]	[80 80 80 80]	vasp	[2.375]	0	3e-05	-1e-05	0	-0.07827	0	0	0	0	0.02517	0	0	0.03503	0.05422	0.02566	0	0	0	0.07827	mm2	Hg4-H44-C64-I8-N8-Cl4	0.10702	0.18529			132	2.69979	Polar	equal	Converged
PEKKEW_FSR	['1', '3']	[19, 21]	[1, 3]	[1, 1, 1, 3, 3, 3]	[19 19 19 21 21 21]	vasp	[1.217, 3.824]	0	0	0	0.07805	0	0	0	1e-05	0	0	-0.07814	0	0	0	0	0	0	0	0.07814	622	K3-Sc3-H12-C12-O30	0.02318	0.10132	['O', '[K]', '[Sc]']	['[O-]C(=O)C(=O)[O-]']	60	1.86236	Non-polar	equal	Converged
BATVEA_FSR	['12']	[48]	[2]	[2, 2]	[48 48]	vasp	[2.491]	-5e-05	0	1e-05	0	0.02765	0	0.00012	7e-05	2e-05	-0.00506	0	0	-0.03885	-0.05044	0.04527	0	0	0	0.0781211	mm2	C24-Cd2-H24-N4-O16	0.06497	0.09262			70	2.15909	Polar	equal	Converged
ZUQPIK_FSR	['11']	[29]	[1]	[1, 1, 1, 1]	[29 29 29 29]	vasp	[0.602]	0	0	0	0	-0.00461	0	0	0	0	-0.00945	0	0	-0.04509	-0.00506	-0.0635	0	0	0	0.0780446	mm2	C64-Cu4-H64-I4-S8	0.0294068	0.0580584	['I[Cu][Cu]I']	['S1Cc2ccc(cc2)CSCc2ccc(C1)cc2']	144	1.71333	Polar	equal	Converged
QAKDAH_FSR	['12']	[48]	[2]	[2, 2]	[48 48]	vasp	[2.826]	0.00441	0.0016	0.00088	-0.01901	-0.00079	0.06911	0.07637	-0.00282	0.00771	0	-0.00769	0	-2e-05	0.00075	0.00202	0.01831	0.00064	0.004	0.0780227	2	C56-Cd2-H40-N4-O8	0.0455644	0.0887823	['[Cd]']	['[O-]C(=O)c1ccc(cc1)C=Cc1ccncc1']	110	1.54	Polar	equal	Converged
FUZVAZ_FSR	['12']	[30]	[2]	[2, 2]	[30 30]	vasp	[2.494]	-0.02188	-0.02185	-0.01346	-0.02114	-0.00329	0.00013	0.01006	0.05589	0.01457	0.02241	0.01529	0.01553	0.01047	0.02487	-0.01675	0.0135	-0.01601	-0.00166	0.0779133	1	Zn2-H48-C68-N4-O12	0.0350625	0.0669324	['[Zn]']	['[O-]C(=O)COc1ccc2c(c1c1c(OCC(=O)[O-])ccc3c1cccc3)cccc2', 'n1ccc(cc1)c1ccncc1']	134	1.44708	Polar	equal	Converged
FIPWOS_FSR	['12']	[30]	[2]	[2, 2]	[30 30]	vasp	[1.951]	-5e-05	-0.0001	-4e-05	-0.01145	-4e-05	0.00748	0.02027	0.04639	0.05269	0	0.02659	0	-3e-05	-9e-05	-4e-05	0.00563	2e-05	0.04034	0.0777573	2	Zn2-H24-C18-N8-O6	0.111663	0.139703			58	1.33433	Polar	equal	Converged
KADHAB_FSR	['9']	[27]	[2]	[2, 2]	[27 27]	vasp	[1.766]	0.00019	-0.0001	6e-05	-0.03013	0.00022	0.02242	0.00302	-0.00401	-0.07692	0	0.0099	0	6e-05	-0.00018	-1e-05	0.02142	0.00012	-0.01065	0.0777168	2	Co2-P4-H24-C28-S2-N4-O12	0.104498	0.137693	['[Co]']	['[O]P(=O)(c1ccc(s1)P(=O)(O)[O])O', 'n1ccc(cc1)c1ccncc1']	76	1.82314	Polar	equal	Converged
ROCZEP_FSR	['12']	[30]	[2]	[2, 2]	[30 30]	vasp	[2.184]	0.00633	0.04355	0.00489	0	-0.04229	0	0	0	1e-05	-0.01578	0	0.01795	0.02625	0.05609	-0.01136	0	0.01285	0	0.0771884	m	C36-H36-N8-O10-Zn2	0.12222	0.178886	['[Zn]']	['O(CCn1cncc1)CCn1cncc1', '[O-]C(=O)c1cccc(c1)C(=O)[O-]']	92	1.57891	Polar	equal	Converged
DOTHUR_FSR	['12']	[30]	[2]	[2, 2, 2]	[30 30 30]	vasp	[2.167]	-1e-05	0	-2e-05	0.07534	-2e-05	0.01278	0.01262	-0.01244	1e-05	0	-0.07508	0	3e-05	3e-05	6e-05	0	0	0	0.077143	32	Zn3-H54-C54-N12-O12	0.00379924	0.079808	['[Zn]']	['Cc1[nH][n-]c(c1c1c(C)[n-][nH]c1C)C', '[O-]C(=O)c1ccc(cc1)C(=O)[O-]']	135	1.01984	Non-polar	equal	Converged
MUQWIG_FSR	['1']	[3]	[1]	[1, 1, 1, 1]	[3 3 3 3]	vasp	[1.165]	0.00013	0.00024	0.00075	-0.07673	0	0	-1e-05	-2e-05	0	0	-0.05461	0	0	-1e-05	-1e-05	0	0	-0.02022	0.0767342	222	Li4-H36-C56-O20	0.05165	0.0778741	['[Li][OH2]']	['[O]c1ccc(c2c1C(=O)c1ccccc1C2=O)O']	116	1.62082	Non-polar	equal	Converged
GAWHAP_FSR	['1']	[19]	[1]	[1, 1]	[19 19]	vasp	[1.249]	-1e-05	0	0	0.0093	0	0.05251	0.03206	0.02893	0.0048	0	-0.03262	0	2e-05	2e-05	3e-05	0.03869	1e-05	0.04435	0.0765524	2	K2-H60-C38-N6-O18	0.103024	0.103174	['[K]']	['CN1C(=O)[C](C#N)C(=O)N(C1=O)C']	124	1.36259	Polar	equal	Converged
SAFGEN_FSR	['1', '11']	[19, 29]	[1, 2]	[1, 1, 1, 1, 1, 1, 2, 2]	[19 19 19 19 19 19 29 29]	vasp	[1.279, 1.526]	0	0	-1e-05	-0.0765	0	0	0	0	1e-05	0	-0.00518	0	1e-05	0	0	0	0	0.00817	0.0765	222	K6-Cu2-P2-H32-C20-N4-O24	0.07159	0.06641	['[K][OH2][K][OH2][K]']	['O=C1O[Cu]2345[N](C1)(CC(=O)O4)CP(=O)(C[N]5(CC(=O)O3)CC(=O)O2)[O]']	90	1.94406	Non-polar	equal	Converged
QIJNUU_FSR	['1']	[11]	[1]	[1, 1, 1, 1]	[11 11 11 11]	vasp	[1.182]	-0.04734	-0.00544	-0.02351	0.00659	0.01205	0.00209	0.01262	0.04579	0.0213	-0.0166	7e-05	-0.03633	0.02432	0.0255	-0.01867	0.02534	-0.01866	-0.00652	0.0762717	1	Na4-H40-C32-S2-O24	0.120695	0.103403			102	1.63942	Polar	equal	Converged
JIPLEA_FSR	['fblock']	[70]	[3]	[3, 3]	[70 70]	vasp	[3.874]	0	0	0	0	0.0384	0	0	0	0	0.01444	0	0	0.04152	-0.01955	-0.06079	0	0	0	0.0761678	mm2	C12-H18-O12-Yb2	0.110015	0.144168	['[Yb]']	['[O-]C(=O)C']	44	2.43801	Polar	equal	Converged
EXOKOS_FSR	['14']	[82]	[2]	[2]	[82]	vasp	[3.169]	0.00397	0.00279	0.00119	-0.01576	-0.00015	-0.01334	-0.00623	-0.00047	0.07562	0	-0.00586	0	-0.00044	-0.00034	-3e-05	0.02761	-4e-05	-0.00886	0.0761088	2	C18-H20-O8-P2-Pb1	0.109931	0.128558	['[Pb]']	['OC(=O)CCP(=O)(c1ccccc1)[O]']	49	2.13762	Polar	equal	Converged
EKUFUN_FSR	['9']	[27]	[2]	[2, 2]	[27 27]	vasp	[1.257]	-1e-05	-1e-05	0	-0.01558	0	0.03638	-0.00697	-0.01656	-0.06675	0	0.03182	0	2e-05	1e-05	-1e-05	0.01086	0	-0.00461	0.0760979	2	Co2-H48-C44-S2-N8-O14	0.0674561	0.0721546	['[OH2][Co]([OH2])[OH2]']	['c1cc(cc(c1)Cn1cnc2c1cccc2)Cn1cnc2c1cccc2']	118	1.6684	Polar	equal	Converged
ESADUZ01_FSR	['12']	[48]	[2]	[2, 2]	[48 48]	vasp	[2.557]	0.00016	0.0002	-5e-05	0	-0.03485	0	7e-05	-3e-05	5e-05	0.03015	0	0	0.06468	0.00573	0.03952	0	0	0	0.0760144	mm2	C28-Cd2-H24-O14	0.30245	0.3373	['O', '[Cd]']	['[O-]C(=O)c1ccc(cc1)Oc1ccc(cc1)C(=O)[O-]']	68	1.95582	Polar	equal	Converged
LOVTAR_FSR	['11']	[29]	[1]	[1, 1]	[29 29]	vasp	[0.41]	0	0	0	0	-0.0009	0	0.00013	0.00021	7e-05	-0.00416	0	0	-0.00133	-0.04149	0.06362	0	0	0	0.0759651	mm2	C18-Cu2-H16-N10-O4-S2	0.135208	0.206076	['[Cu]']	['[S]C#N']	52	1.86112	Polar	equal	Converged
WIPKAJ_FSR	['14']	[82]	[2]	[2, 2]	[82 82]	vasp	[3.305]	-0.00149	0.05195	0.00225	0	0.00216	0	-0.00024	-0.00442	0.00013	0.05197	0	0	-0.05528	0.03031	-0.03076	0	0	0	0.0759316	mm2	C40-H28-N12-O18-Pb2	0.0712632	0.0968175			100	2.17538	Polar	equal	Converged
BENHUA_FSR	['1']	[19]	[1]	[1, 1, 1, 1]	[19 19 19 19]	vasp	[1.222]	-0.00021	-0.0006	-0.00019	0.05165	0	0	0	-2e-05	0	0	-0.06112	0	2e-05	0	2e-05	0	0	-0.07571	0.07571	222	K4-H28-C24-N16-O20	0.0938	0.145452	['[OH2][K]']	['O=C([N]N(=O)=O)NN=Cc1ccco1']	92	1.66447	Non-polar	equal	Converged
APIROH_FSR	['13']	[49]	[3]	[3]	[49]	vasp	[3.511]	-1e-05	-8e-05	1e-05	0.07563	0	0	1e-05	-0.00034	-0.00053	0	-0.00841	0	0	-1e-05	2e-05	0	0	0.00014	0.07563	222	C10-F3-H8-In1-N2	0.02602	0.08218			24	2.08163	Non-polar	equal	Converged
IFUJID_FSR	['1']	[11]	[1]	[1, 1, 1, 1]	[11 11 11 11]	vasp	[1.165]	8e-05	-2e-05	3e-05	0	0.00605	0	6e-05	4e-05	-1e-05	0.00446	0	0	-0.0366	-0.03168	0.05778	0	0	0	0.0753771	mm2	Na4-H28-C8-S8-O16	0.03569	0.0528817	['[OH2][Na]']	['SCCS([O])([O])[O]']	64	1.71982	Polar	equal	Converged
LAGTEU_FSR	['12']	[48]	[2]	[2, 2, 2, 2]	[48 48 48 48]	vasp	[2.66]	1e-05	8e-05	-6e-05	-0.07531	0	0	0	1e-05	1e-05	0	0.00442	0	0	0	0	0	0	0.05477	0.0753101	222	Cd4-H40-C44-N8-O20	0.11472	0.18801	['[Cd]']	['O=C1NCCN1', '[O-]C(=O)c1cccc(c1)C(=O)[O-]']	116	2.00921	Non-polar	equal	Converged
UNIRUF01_FSR	['1']	[3]	[1]	[1, 1, 1, 1]	[3 3 3 3]	vasp	[1.082]	-1e-05	0	7e-05	0.07523	0	0	-0.00014	5e-05	0	0	-0.05394	0	-1e-05	0	-1e-05	0	0	-0.02301	0.07523	222	C8-H8-Li4-O12	0.05576	0.13099			32	1.79809	Non-polar	equal	Converged
XUDMUG_FSR	['12']	[48]	[2]	[2]	[48]	vasp	[2.514]	0.00353	-0.0013	0.00217	0.00979	-0.00918	0.00796	-0.04789	-0.01465	-0.02847	0	0.04708	0	0.00032	0.00039	-4e-05	-0.00059	0.00068	0.00325	0.0749178	2	C12-Cd1-H8-I2-N4	0.00460957	0.076881			27	2.55921	Polar	equal	Converged
NUYWEK_FSR	['12']	[48]	[2]	[2, 2]	[48 48]	vasp	[2.485]	-0.01148	-0.02044	0.04695	-0.00824	-0.00562	0.01618	0.02102	0.02939	0.03078	0.03046	-0.00164	0.00473	-0.01766	-0.01809	-0.04009	-0.00401	-0.0067	-0.00218	0.0748996	1	Cd2-H28-C40-N8-O8	0.116488	0.130595	['[Cd]']	['[O-]C(=O)c1ccc(cc1)n1cncc1']	86	1.44332	Polar	equal	Converged
OMEDOZ_FSR	['13']	[81]	[1]	[1, 1]	[81 81]	vasp	[1.76]	0	5e-05	0	0.00543	-2e-05	-0.00228	-0.03504	-0.03125	-0.05715	0	-0.01136	0	-2e-05	-2e-05	0	-0.03023	-1e-05	-0.02096	0.0748301	2	Tl2-B2-H28-C32-N12	0.155824	0.188029			76	2.09264	Polar	equal	Converged
JETQOP_FSR	['11']	[29]	[1]	[1, 1, 1, 1, 1, 1, 1, 1]	[29 29 29 29 29 29 29 29]	vasp	[0.47]	-3e-05	7e-05	0	-0.06956	-0.02637	-0.00012	2e-05	8e-05	-1e-05	-0.02627	0.06975	-8e-05	-0.02264	-0.02264	0.02481	0	0	0	0.0745692	6	Cu8-H36-C24-I2-N18	0.0652116	0.095182	['[Cu]', '[Cu]I']	['CC1=NN=C([N]1)C']	88	2.20647	Polar	equal	Converged
DOTWAL_FSR	['fblock']	[57]	[3]	[3, 3, 3, 3]	[57 57 57 57]	vasp	[4.455]	-0.05249	0.05245	-4e-05	0	0	0	-0.00023	0.00032	3e-05	0	0	0.05425	0	0	-1e-05	0	0	0	0.074206	-6m2	La4-H36-C24-O36	0.123249	0.197453	['[La]', '[OH2][La]([OH2])[OH2]']	['[O-]C(=O)COCC(=O)[O-]']	100	1.83827	Non-polar	equal	Converged
LOYBEI_FSR	['12']	[48]	[2]	[2, 2, 2, 2]	[48 48 48 48]	vasp	[2.702]	0	0	0	-0.01063	0	-0.02663	0.02072	-0.05219	-0.03406	0	-0.03415	0	-1e-05	0	-1e-05	-0.0066	1e-05	0.01376	0.0740231	2	Cd4-H48-C48-O24	0.101287	0.10054	['[OH2][Cd][OH2]']	['[O-]C(=O)C=Cc1cccc(c1)C=CC(=O)[O-]']	124	1.96083	Polar	equal	Converged
EKEHUZ_FSR	['12']	[30]	[2]	[2, 2, 2, 2, 2, 2]	[30 30 30 30 30 30]	vasp	[2.068]	-0.05217	0.05221	0	0.0022	0	0	0.00016	0.00014	-2e-05	1e-05	-0.00225	0.05219	1e-05	1e-05	-1e-05	0	0	0	0.0738406	32	Zn6-P6-H42-C18-N6-O18	0.053404	0.127166	['[Zn]']	['C1CN2CCN1CC2', '[O]P(=O)[O]']	96	1.69419	Non-polar	equal	Converged
CISJIY01_FSR	['3']	[39]	[3]	[3, 3]	[39 39]	vasp	[4.813]	0	0	0	0.02053	0	-0.03218	-0.04326	-0.03085	0.04125	0	0.03004	0	0	0	1e-05	0.00615	0	0.03397	0.0736689	2	Y2-H42-C54-O12	0.10227	0.101447	['[Y]']	['[O-]C(=O)C=Cc1ccccc1']	110	1.51227	Polar	equal	Converged
MCYSCD_FSR	['12']	[48]	[2]	[2, 2]	[48 48]	vasp	[2.329]	2e-05	-2e-05	1e-05	0.02491	-1e-05	0.03066	-0.02108	-0.00104	0.02744	0	-0.00249	0	1e-05	-1e-05	0	0.06262	-1e-05	0.01837	0.0736552	2	Cd2-H32-C16-S4-N4-O8	0.0460005	0.0476574			66	2.00235	Polar	equal	Converged
QUVHIZ_FSR	['2', '9']	[38, 27]	[2, 3]	[2, 2, 3, 3, 3, 3]	[38 38 27 27 27 27]	vasp	[2.766, 1.321]	0	0	1e-05	-0.0716	3e-05	0.00051	0.01802	-0.00396	-0.0266	0	-0.02344	0	3e-05	-3e-05	-5e-05	-0.00387	4e-05	-0.07216	0.0736166	2	Sr2-Co4-H32-C24-N8-O32	0.0587631	0.0642068	['[Co]', '[Sr]']	['[O-]C(=O)C(=O)[O-]']	102	1.79672	Polar	equal	Converged
ORAWEL_FSR	['1']	[11]	[1]	[1, 1, 1, 1]	[11 11 11 11]	vasp	[1.193]	0	0	0	-0.03697	0	0	-2e-05	0	0	0	0.07345	0	0	-1e-05	0	0	0	-0.05775	0.07345	222	Na4-H28-C16-O28	0.04481	0.11826			76	1.90972	Non-polar	equal	Converged
ROJBID_FSR	['2']	[20]	[2]	[2, 2]	[20 20]	vasp	[2.502]	2e-05	0	2e-05	-0.00028	0.00011	-0.04534	-0.0347	-0.06346	0.01039	0	0.00686	0	7e-05	2e-05	0.00014	0.01012	7e-05	0.01137	0.0733912	2	Ca2-H36-C20-N4-Cl4-O8-F4	0.0279703	0.0685292			78	1.47965	Polar	equal	Converged
GIFKOY_FSR	['12']	[30]	[2]	[2, 2, 2, 2, 2, 2]	[30 30 30 30 30 30]	vasp	[2.0]	0	0	-1e-05	0	-0.02929	0	4e-05	0	2e-05	-0.00378	0	0	-0.07073	0.01626	0.00807	0	0	0	0.0730222	mm2	C44-H44-N24-O24-S4-Zn6	0.0895572	0.0407958			146	1.99059	Polar	equal	Converged
KELLAR_FSR	['1', '10']	[55, 46]	[1, 2]	[1, 1, 1, 1, 2, 2, 2, 2]	[55 55 55 55 46 46 46 46]	vasp	[1.444, 0.891]	0	-1e-05	0	-0.03703	0	0	0	-1e-05	0	0	-0.06081	0	4e-05	-8e-05	3e-05	0	0	-0.07298	0.0729801	222	Cs4-H24-Pd4-C12-N4-Cl8-O12	0.06706	0.12787	['[Cs]']	['OCC1[NH2][Pd](OC1=O)(Cl)Cl']	68	3.08291	Non-polar	equal	Converged
PEALCU10_FSR	['11']	[29]	[2]	[2, 2]	[29 29]	vasp	[1.518]	1e-05	0	1e-05	0.01521	1e-05	0.00156	-0.00205	-0.05526	-0.04668	0	-0.00821	0	1e-05	-1e-05	-1e-05	-0.01747	0	-0.02084	0.0728306	2	Cu2-H40-C36-N4-O8	0.0248293	0.0704184			90	1.6347	Polar	equal	Converged
QEKBEO_FSR	['12']	[48]	[2]	[2, 2, 2, 2, 2, 2]	[48 48 48 48 48 48]	vasp	[2.833]	1e-05	3e-05	-0.00015	0	-0.02657	0	0	0	-2e-05	0.04901	0	0	0.03742	-0.0091	-0.06147	0	0	0	0.0725372	mm2	C28-Cd6-H16-N20-O4-S12	0.0231162	0.095087	['[Cd]']	['[O-][n+]1ccncc1', '[S]C#N']	86	2.29731	Polar	equal	Converged
AWOLUU_FSR	['1']	[19]	[1]	[1, 1, 1, 1]	[19 19 19 19]	vasp	[1.322]	5e-05	-9e-05	-2e-05	0	-0.07233	0	0	0	0	0.04986	0	0	-0.00258	0.05184	0.01922	0	0	0	0.0723302	mm2	C24-H40-K4-N8-O14-S4	0.155468	0.173036	['O', '[K]']	['Nc1ccc(cc1)S(=O)(=O)[NH]']	94	1.64836	Polar	equal	Converged
FELJAJ_FSR	['14']	[82]	[2]	[2]	[82]	vasp	[2.811]	0.01817	0.00617	0.04074	-0.01087	0.0009	0.02091	-0.00746	-0.05578	-0.0105	0.0194	-0.02524	0.00529	-0.04269	-0.01508	-0.01381	-0.01747	0.02233	-0.0004	0.0721928	1	H31-Pb1-C29-N5-O7	0.0876849	0.101287	['[Pb]']	['O=C(Nc1ccc(cc1)NC(=O)NC(C(=O)[O-])Cc1ccccc1)NC(C(=O)[O-])Cc1ccccc1']	73	1.5898	Polar	equal	Converged
FARCAC_FSR	['2']	[12]	[2]	[2, 2, 2, 2]	[12 12 12 12]	vasp	[2.107]	-2e-05	3e-05	0.00013	-0.03644	0	0	0	0	0	0	-0.07201	0	0	0	0	0	0	0.01245	0.07201	222	Mg4-H36-C16-N4-O24	0.06844	0.06226			84	1.60414	Non-polar	equal	Converged
WOCQIQ_FSR	['2']	[20]	[2]	[2, 2, 2, 2]	[20 20 20 20]	vasp	[2.496]	-3e-05	0.00015	5e-05	0.02329	0	0	0	0	0	0	0.07191	0	0	0	1e-05	0	0	0.05335	0.07191	222	Ca4-H44-C20-N4-Cl8-O12	0.00608	0.06583	['[OH2][Ca]']	['[O-]C(=O)C1CCC[NH2]1']	92	1.64733	Non-polar	equal	Converged
UVIGIR_FSR	['1']	[3]	[1]	[1, 1]	[3 3]	vasp	[1.141]	0.00209	0.01395	0.03167	0	0.01194	0	3e-05	-1e-05	1e-05	-0.05296	-2e-05	0.03795	-0.00045	-0.04963	-0.03073	0	0.03695	0	0.071874	m	C20-H52-Li2-N2-O16-S4	0.0749966	0.107858	['[OH2][Li][OH2]']	['C[N](CCCCS([O])([O])[O])(CCCCS([O])([O])[O])C']	96	1.43408	Polar	equal	Converged
VEDVEH_FSR	['12']	[48]	[2]	[2, 2]	[48 48]	vasp	[2.55]	-0.00016	-6e-05	-0.00018	0.0042	-0.00015	0.00034	0.00465	0.06962	0.01034	0	0.00328	0	-0.0001	-3e-05	-0.00011	-0.06925	-0.00012	-0.01869	0.0718481	2	C34-Cd2-H32-O14	0.0906361	0.146978	['[OH2][Cd]']	['CC(C(=O)[O-])Oc1ccc(cc1)OCc1ccc(cc1)C(=O)[O-]']	82	1.80277	Polar	equal	Converged
BUKXUC_FSR	['1']	[3]	[1]	[1, 1, 1, 1]	[3 3 3 3]	vasp	[1.248]	0	-1e-05	-1e-05	-0.00171	1e-05	0.01779	0.04014	0.03402	0.04702	0	-0.01286	0	-1e-05	-1e-05	0	0.03668	-1e-05	0.00262	0.0717275	2	Li4-H44-C32-N8-O8	0.0505272	0.0946388	['[Li]']	['[O]c1ccncc1']	96	1.25619	Polar	equal	Converged
XIFXEQ_FSR	['11']	[29]	[2]	[2, 2, 2, 2]	[29 29 29 29]	vasp	[1.29]	1e-05	6e-05	4e-05	0.01564	-1e-05	0.0089	-0.01672	0.00821	-0.01552	0	0.02674	0	0	1e-05	0	0.0015	0	0.07088	0.0715232	2	Cu4-H32-C36-N16-O4	0.0374895	0.0788056	['[Cu]']	['CC(c1ccccn1)[O]', 'N#C[N]C#N']	92	1.73118	Polar	equal	Converged
LIQBAP_FSR	['12']	[30]	[2]	[2, 2]	[30 30]	vasp	[2.063]	0.00034	-0.0001	-0.00035	-0.00752	-0.001	-0.02012	0.02653	-0.00151	0.04466	0	0.04913	0	-0.00011	-6e-05	-2e-05	0.00098	0.00012	0.00654	0.0715197	2	C40-Cl2-H50-N4-O12-S2-Zn2	0.107439	0.102592	['Cl[Zn]']	['[O]S(=O)(=O)[O]']	112	1.51457	Polar	equal	Converged
WEXCIN_FSR	['12']	[30]	[2]	[2, 2]	[30 30]	vasp	[2.252]	0	0	-2e-05	-0.01478	0	-0.00368	-0.00364	-0.05865	0.03521	0	0.01949	0	1e-05	1e-05	2e-05	-0.01342	-1e-05	-0.01033	0.0712227	2	Zn2-H38-C30-S2-N6-O14	0.0788292	0.115072	['[OH2][Zn]']	['[O-]C(=O)C(NS(=O)(=O)c1ccc(cc1)C)CCC(=O)[O-]']	92	1.67477	Polar	equal	Converged
VINWOH_FSR	['1']	[19]	[1]	[1, 1, 1, 1]	[19 19 19 19]	vasp	[1.491]	1e-05	-3e-05	5e-05	0	0.04776	0	-7e-05	-6e-05	-3e-05	-0.07122	0	0	-0.01857	0.03452	-0.053	0	0	0	0.0712201	mm2	K4-H84-C96-S8-O36	0.04012	0.11134	['[OH2][K]']	['Oc1ccc(cc1)S(=O)(=O)c1ccc(cc1)O']	228	1.49012	Polar	equal	Converged
HULGAY_FSR	['12']	[30]	[2]	[2, 2, 2, 2]	[30 30 30 30]	vasp	[2.122]	0	0	0	0	-0.01425	0	-1e-05	-1e-05	0	0.07107	0	0	-0.00785	-0.01561	-0.03752	0	0	0	0.07107	mm2	Zn4-H32-C56-I12-N20-O16	0.0310285	0.08246	['[Zn]']	['[O-]C(=O)c1c(I)c(C(=O)[O-])c(c(c1I)N)I']	140	2.60339	Polar	equal	Converged
BUVKAG_FSR	['12']	[30]	[2]	[2]	[30]	vasp	[2.407]	1e-05	-5e-05	-4e-05	0.05115	-1e-05	0.04926	-0.01401	0.01811	-0.03466	0	0.03944	0	3e-05	-4e-05	-0.00012	-0.01282	0	0.01627	0.0710456	2	C18-H22-N4-O6-Zn1	0.0448482	0.0559969			51	1.25263	Polar	equal	Converged
NELWUY_FSR	['12']	[30]	[2]	[2]	[30]	vasp	[2.273]	3e-05	5e-05	7e-05	0.03115	2e-05	-0.02324	-0.05644	0.00122	-0.03552	0	-0.02393	0	-5e-05	-3e-05	-4e-05	-0.04586	-3e-05	0.02528	0.0708614	2	C12-H22-N4-O8-Zn1	0.0638626	0.109234			47	1.48575	Polar	equal	Converged
GENRUO_FSR	['15']	[83]	[3]	[3, 3, 3, 3]	[83 83 83 83]	vasp	[2.546]	-5e-05	-4e-05	1e-05	0	0.01873	0	0	-3e-05	-1e-05	0.07081	0	0	-0.00571	-0.00256	-0.04755	0	0	0	0.07081	mm2	Bi4-H40-C52-S4-O12-F12	0.09361	0.130038	['[Bi]']	['FC(S([O])([O])[O])(F)F']	124	2.3676	Polar	equal	Converged
NEBMEP_FSR	['12']	[48]	[2]	[2, 2, 2, 2]	[48 48 48 48]	vasp	[2.644]	6e-05	-4e-05	6e-05	0.07075	0	0	-2e-05	-5e-05	-5e-05	0	-0.00142	0	0	-1e-05	-1e-05	0	0	-0.01691	0.0707501	222	Cd4-H44-C68-N4-O16	0.01125	0.0595001	['[Cd]']	['[O-]C(=O)c1ccc(c2c1cccc2)C(=O)[O-]']	136	1.92534	Non-polar	equal	Converged
FELXIE_FSR	['12']	[30]	[2]	[2, 2, 2, 2]	[30 30 30 30]	vasp	[1.844]	0	0	0	-0.01719	0	0	1e-05	2e-05	0	0	-0.07047	0	0	0	0	0	0	0.05729	0.07047	222	Zn4-H48-C28-S8-N16-O16	0.1179	0.14301	['[Zn]']	['[O-]C(=O)CC(=C)C(=O)[O-]']	120	1.79459	Non-polar	equal	Converged
LUPZUS_FSR	['fblock']	[70]	[3]	[3, 3]	[70 70]	vasp	[4.789]	0	0	1e-05	0.02049	1e-05	-0.03789	-0.04823	-0.02075	0.03821	0	0.027	0	0	1e-05	1e-05	0.01343	1e-05	0.03697	0.0703257	2	Yb2-H42-C54-O12	0.102778	0.0892949	['[Yb]']	['[O-]C(=O)C=Cc1ccccc1']	110	1.78533	Polar	equal	Converged
IDIGAF_FSR	['12']	[80]	[2]	[2, 2, 2, 2]	[80 80 80 80]	vasp	[2.254]	0	-9e-05	-0.00015	-0.07031	0	0	0	0	-1e-05	0	0.00227	0	0	0	1e-05	0	0	0.00257	0.0703102	222	Hg4-H32-C36-N12-Cl4-O8	0.01657	0.0537403			96	2.64123	Non-polar	equal	Converged
NAPZOV_FSR	['12']	[48]	[2]	[2, 2, 2, 2]	[48 48 48 48]	vasp	[2.634]	0	1e-05	0	0	0.0309	0	0	1e-05	0	0.01661	0	0	0.04352	0.04614	0.02994	0	0	0	0.0701377	mm2	Cd4-H52-C48-N4-O20	0.0463029	0.0908614	['[Cd]']	['Cc1cc(cc(c1)C(=O)[O-])C(=O)[O-]']	128	1.87367	Polar	equal	Converged
CDACET01_FSR	['12']	[48]	[2]	[2, 2, 2, 2]	[48 48 48 48]	vasp	[2.324]	0	0	0	-0.05637	0	0	0	0	0	0	0.07008	0	0	0	0	0	0	-0.0668	0.07008	222	Cd4-H40-C16-O24	0.06317	0.12997	['[OH2][Cd][OH2]']	['[O-]C(=O)C']	84	2.17139	Non-polar	equal	Converged
KIWTAM_FSR	['11']	[29]	[1]	[1, 1, 1, 1]	[29 29 29 29]	vasp	[0.046]	3e-05	2e-05	1e-05	0	-0.03357	0	3e-05	7e-05	5e-05	0.02973	0	0	-0.02225	0.02338	0.0619	0	0	0	0.069809	mm2	Cu4-H20-C20-N16	0.177689	0.131	['[Cu]']	['Nc1cnccn1', '[C]#N']	60	1.95748	Polar	equal	Converged
CACROP_FSR	['12']	[48]	[2]	[2, 2]	[48 48]	vasp	[2.213]	-0.00978	0.0414	0.02572	0	0.01759	0	-1e-05	-2e-05	-5e-05	0.05306	0	0.01108	0.03226	0.03503	-0.02645	0	0.03601	0	0.0695632	m	C20-Cd2-H40-N4-O10	0.216908	0.212572	['[OH2][Cd]']	['C1CN2CCN1CC2']	76	1.60748	Polar	equal	Converged
RUGFUW_FSR	['12']	[30]	[2]	[2, 2]	[30 30]	vasp	[2.138]	0	1e-05	1e-05	-0.00669	0	0.00806	0.03367	-0.04201	-0.0437	0	0.00388	0	1e-05	1e-05	-1e-05	-0.01518	1e-05	-0.00962	0.0694496	2	Zn2-H48-C72-N12-O16	0.041079	0.0637069	['[Zn]']	['[O-]C(=O)C(N1C(=O)c2cccc3c2c(C1=O)ccc3)Cc1cnc[nH]1']	150	1.43326	Polar	equal	Converged
INIZEK_FSR	['12']	[48]	[2]	[2, 2, 2, 2]	[48 48 48 48]	vasp	[2.204]	0.00015	0.00014	3e-05	0.06939	0	0	-5e-05	-3e-05	-1e-05	0	0.02599	0	0	-3e-05	0	0	0	0.00849	0.0693903	222	Cd4-H32-C48-S8-N8-O12	0.0381	0.0938102	['[Cd]']	['[O]S(=S)(=O)[O]']	112	2.16745	Non-polar	equal	Converged
NIRCUO_FSR	['1']	[3]	[1]	[1, 1, 1, 1, 1, 1, 1, 1]	[3 3 3 3 3 3 3 3]	vasp	[1.073]	5e-05	-8e-05	8e-05	0.03758	0	0	-0.00018	0.00018	6e-05	0	0.02453	0	-1e-05	0	0	0	0	0.06923	0.06923	222	C16-H20-Li8-O26	0.06061	0.02935			70	1.77056	Non-polar	equal	Converged
KOJCUI_FSR	['7']	[25]	[2]	[2, 2, 2, 2]	[25 25 25 25]	vasp	[2.53]	9e-05	4e-05	-1e-05	1e-05	0.06873	-0.00024	0.00695	0.00943	0.00386	0.01421	0	0	0.03552	0.00416	0.0259	-0.00104	0	0	0.0687305	mm2	C56-H28-Mn4-N12-O32	0.168055	0.193426	['[Mn]']	['[O-]C(=O)c1ccc(cc1)Nc1c(cc(cc1N(=O)=O)C(=O)[O-])N(=O)=O']	132	1.53117	Polar	equal	Converged
GIFYOL_FSR	['12']	[30]	[2]	[2, 2]	[30 30]	vasp	[2.016]	2e-05	-4e-05	-2e-05	-0.00137	1e-05	-0.05827	-0.02544	-0.0606	-0.00246	0	-0.00445	0	2e-05	9e-05	7e-05	-0.05073	-8e-05	0.02517	0.0685759	2	Zn2-H40-C22-N8-Cl4-O4	0.102779	0.161868			80	1.63638	Polar	equal	Converged
NOCLOH01_FSR	['2']	[38]	[2]	[2, 2, 2]	[38 38 38]	vasp	[2.899]	-0.02565	0.02611	-0.00048	0.01391	0.00133	0.0034	0.00322	-0.00277	2e-05	0.00137	-0.01211	0.02601	-0.04354	-0.04354	-0.02945	0	0	0	0.068256	3	Sr3-H33-C33-N3-O15	0.0880729	0.110377	['[Sr]']	['[O-]C(=O)c1ccc(cc1)C(=O)[O-]']	87	1.69363	Polar	equal	Converged
HALMOZ_FSR	['12']	[48]	[2]	[2, 2]	[48 48]	vasp	[2.461]	0.05046	0.01412	0.03117	0	0.01702	0	0.00011	2e-05	0.0001	0.01108	8e-05	0.0532	0.03729	-0.03506	-0.01179	0	0.00458	0	0.0681933	m	C44-Cd2-H36-N8-O8	0.0997266	0.129269	['[Cd]']	['[O-]C(=O)c1ccc(cc1)n1ccnc1C']	98	1.69945	Polar	equal	Converged
NUFPAG_FSR	['12']	[30]	[2]	[2, 2]	[30 30]	vasp	[2.327]	0.0001	6e-05	0.00018	-0.00228	1e-05	-0.01633	0.05208	-0.03413	-0.02596	0	-0.00941	0	2e-05	2e-05	-6e-05	0.00419	0	-0.01409	0.068115	2	Zn2-H44-C36-N4-O14	0.0664294	0.100726			100	1.51943	Polar	equal	Converged
IQAGEN_FSR	['12']	[30]	[2]	[2, 2]	[30 30]	vasp	[2.296]	-1e-05	-1e-05	-1e-05	0	0.02216	0	5e-05	5e-05	4e-05	-0.0552	0	0	-0.04263	-0.0481	0.02159	0	0	0	0.0678017	mm2	C52-H40-N4-O12-Zn2	0.0179406	0.0595376	['[Zn]']	['[O-]C(=O)c1ccc(cc1)OCc1ccncc1']	110	1.41595	Polar	equal	Converged
POMSIV_FSR	['2']	[20]	[2]	[2, 2, 2, 2]	[20 20 20 20]	vasp	[2.752]	0.00019	0.0001	0.00026	-0.03819	0	0	1e-05	-1e-05	-1e-05	0	-0.00107	0	0	-1e-05	0	0	0	-0.06768	0.06768	222	Ca4-H44-C48-N4-O20	0.10121	0.10014	['[Ca]']	['O=C1CCCN1', '[O-]C(=O)c1cccc(c1)C(=O)[O-]']	120	1.52176	Non-polar	equal	Converged
OVAZOB_FSR	['11']	[29]	[2]	[2, 2, 2, 2]	[29 29 29 29]	vasp	[1.349]	0.00013	9e-05	-0.00018	-0.0676	0	0	0	-3e-05	0	0	0.02162	0	1e-05	3e-05	3e-05	0	0	-0.02256	0.0676004	222	Cu4-H48-C44-N12-O16	0.05518	0.0768	['[Cu]']	['[O-]C(=O)CC(C(=O)[O-])N', 'c1ncn(c1)Cc1ccc(cc1)Cn1cncc1']	124	1.59897	Non-polar	equal	Converged
ADOJIN_FSR	['12']	[80]	[2]	[2, 2]	[80 80]	vasp	[2.677]	2e-05	4e-05	1e-05	0	-0.04423	0	-4e-05	-2e-05	-1e-05	0.04431	0	0	-0.04783	0.04773	-3e-05	0	0	0	0.0675712	-42m	Hg2-H12-C20-Br8-N4-Cl4	0.0419173	0.025654			50	3.20917	Non-polar	equal	Converged
NOBLUM01_FSR	['12']	[48]	[2]	[2, 2, 2, 2]	[48 48 48 48]	vasp	[2.675]	0.00035	0.00039	-0.00011	0.06277	0	0	0	0	-1e-05	0	0.00206	0	0	0	0	0	0	-0.06753	0.06753	222	Cd4-H24-C24-S12-N8-O20	0.04331	0.11084	['O', '[Cd]']	['[O-]C(=O)CSc1nnc(s1)SCC(=O)[O-]']	92	2.37874	Non-polar	equal	Converged
NEPRUX_FSR	['1']	[3]	[1]	[1, 1, 1, 1]	[3 3 3 3]	vasp	[1.223]	-0.0006	-0.00251	-0.00019	0.03006	-7e-05	-0.00523	-0.01083	-0.06483	0.01207	0	0.00784	0	3e-05	-8e-05	0	-0.00349	-4e-05	0.00809	0.0673429	2	Li4-H6-C12-N6-O14	0.0646275	0.0994057	['[Li]']	['OC(=O)c1nccnc1C(=O)[O-]', '[O]N(=O)=O']	42	1.79554	Polar	equal	Converged
LICSUM_FSR	['2']	[12]	[2]	[2, 2, 2, 2]	[12 12 12 12]	vasp	[2.175]	3e-05	-1e-05	1e-05	-0.06724	0	0	-1e-05	8e-05	-0.00014	0	-0.0546	0	-5e-05	-0.00018	-5e-05	0	0	0.03901	0.06724	222	Mg4-H24-C16-O24	0.08559	0.14434	['[OH2][Mg]']	['[O-]C(=O)COCC(=O)[O-]']	68	1.84541	Non-polar	equal	Converged
IYOYUR_FSR	['11']	[29]	[1]	[1, 1]	[29 29]	vasp	[-0.069]	0.00034	-0.00061	0.00119	-0.06539	0	0	0.00086	0.00142	-5e-05	0	-0.02885	0	-0.00013	0	-0.0001	0	0	-0.06706	0.0670602	222	C28-Cu2-H12-N14	0.02487	0.052988	['[Cu]']	['N#C[C]1C(=C(C(=C1C#N)C#N)C#N)C#N']	56	1.45031	Non-polar	equal	Converged
FITDUK_FSR	['12']	[30]	[2]	[2, 2]	[30 30]	vasp	[1.985]	0	0	0	0.03348	0	-0.00948	0.00122	0.01015	-0.0197	0	0.02444	0	0	-1e-05	-1e-05	-0.03222	0	0.05189	0.0669649	2	Zn2-H34-C30-N10-O12	0.149847	0.166521			88	1.53384	Polar	equal	Converged
HEMRUP_FSR	['12']	[30]	[2]	[2, 2]	[30 30]	vasp	[2.209]	2e-05	-0.00025	4e-05	0.00058	8e-05	-0.01938	-0.05592	0.01314	0.03323	0	-0.00854	0	-2e-05	-0.00042	-2e-05	0.02995	0.00014	0.01577	0.0669095	2	C40-Cl4-H34-N6-O8-S2-Zn2	0.138135	0.101219	['[Zn]']	['C(Cc1ccncc1)Cc1ccncc1', '[O-]C(=O)c1cc(c(cc1Cl)Cl)S(=O)(=O)[NH]']	96	1.71896	Polar	equal	Converged
DOFWUR_FSR	['2']	[56]	[2]	[2, 2]	[56 56]	vasp	[3.018]	0.00683	0.00136	-0.00074	0	0.00845	0	-0.00056	0.00021	-0.00077	-0.01986	0	0	0.06004	-0.01687	-0.02325	0	0	0	0.0668406	mm2	Ba2-C20-H24-N12-O32	0.0161853	0.0641944	['[OH2][Ba]([OH2])([OH2])[OH2]']	['[O-][N+]1C=C(N(=O)=O)C(=O)C(=C1)N(=O)=O']	90	2.0269	Polar	equal	Converged
KIJWIL_FSR	['12']	[48]	[2]	[2, 2, 2, 2]	[48 48 48 48]	vasp	[2.485]	0.03732	-0.00493	0.02141	0	0.04957	0	1e-05	0	1e-05	0.00243	6e-05	-0.01781	0.00625	-0.00482	-0.0194	0	0.00336	0	0.0658231	m	Cd4-H52-C60-N12-O20	0.0821521	0.105419	['[Cd]']	['O=C(c1ccncc1)Nc1ccncc1', '[O-]C(=O)CCC(=O)[O-]']	148	1.86464	Polar	equal	Converged
HOZXOL_FSR	['12']	[48]	[2]	[2, 2, 2, 2]	[48 48 48 48]	vasp	[2.449]	0	0	0	0.02587	0	0	0	0	0	0	0.03794	0	-5e-05	-2e-05	0	0	0	0.06577	0.06577	222	Br2-C10-Cd4-Cl6-H12-N4-O8	0.0084	0.06854			46	2.86947	Non-polar	equal	Converged
ODEPOC_FSR	['12']	[48]	[2]	[2, 2]	[48 48]	vasp	[2.511]	0	0	0	0	-0.04072	0	0	0	0	0.04069	0	0	-0.04604	0.04592	-3e-05	0	0	0	0.0650256	-42m	Cd2-H12-C20-Br8-N4-Cl4	0.0415496	0.0234761			50	2.8779	Non-polar	equal	Converged
FITCUJ_FSR	['12']	[30]	[2]	[2, 2]	[30 30]	vasp	[1.919]	3e-05	0.00012	-4e-05	0.01944	1e-05	-0.00698	-0.03157	-0.00629	-0.05613	0	0.00578	0	3e-05	0	3e-05	-0.00113	0	-0.00311	0.0649632	2	Zn2-H26-C20-N10-O8	0.106367	0.140525			66	1.16237	Polar	equal	Converged
ROQJIS_FSR	['12']	[48]	[2]	[2, 2, 2, 2]	[48 48 48 48]	vasp	[2.476]	1e-05	1e-05	0	0	-0.01577	0	0	0	1e-05	-0.019	0	0	0.00915	-0.01098	0.06305	0	0	0	0.0646497	mm2	C36-Cd4-H40-N8-O24	0.09522	0.07945	['[OH2][Cd]']	['[O-]C(=O)CC(=O)[O-]']	112	1.90823	Polar	equal	Converged
WITSIE_FSR	['12']	[48]	[2]	[2]	[48]	vasp	[2.446]	0.00014	5e-05	0.00018	-0.00999	0.00016	-0.0609	-0.00388	0.00263	0.06113	0	0.01435	0	0.00019	9e-05	0.00027	0.01031	0.00025	-0.02036	0.0645388	2	C18-Cd1-H12-N14	0.107928	0.154776	['[Cd]']	['N1[CH]N=C([N]1)C1=N[N]C(=N1)c1ccncc1']	45	1.81015	Polar	equal	Converged
ASUQIO03_FSR	['11']	[29]	[1]	[1, 1, 1, 1]	[29 29 29 29]	vasp	[0.538]	0.00021	-0.00014	0	0.06443	0	0	0.00017	-0.00017	3e-05	0	0.06416	0	0	0	1e-05	0	0	0.00435	0.0644305	-42m	C16-Cu4-H24-N12	0.05768	0.0962903	['[Cu]']	['CC1=NN=C([N]1)C']	56	2.10355	Non-polar	equal	Converged
ISAGOY_FSR	['9']	[27]	[2]	[2]	[27]	vasp	[0.39]	-5e-05	-5e-05	-3e-05	0.01225	0	-0.00835	-0.00061	-0.05795	-0.01409	0	-0.00717	0	4e-05	8e-05	5e-05	0.05741	4e-05	0.02803	0.0643261	2	C30-Co1-H32-N6-S2-Si2	0.030172	0.0612416			73	1.36501	Polar	equal	Converged
PIKNIJ_FSR	['12']	[30]	[2]	[2, 2, 2, 2]	[30 30 30 30]	vasp	[2.021]	9e-05	-5e-05	-0.00021	-0.04223	0	0	0	0	0	0	-0.06432	0	0	0	1e-05	0	0	-0.03869	0.06432	222	Zn4-H12-C20-Br4-N16	0.10462	0.06243	['[Zn]Br']	['C1=N[C]2C(=[N]=CN=C2)[N]1']	56	2.27257	Non-polar	equal	Converged
EMOPIH_FSR	['10']	[28]	[2]	[2, 2]	[28 28]	vasp	[1.903]	0	0	0	-0.01149	0	0.02513	0.00498	0.06035	-0.01933	0	0.00982	0	1e-05	0	1e-05	0.05409	-1e-05	0.00112	0.0643195	2	Ni2-H40-C28-O10	0.0886014	0.152001	['O', '[Ni]']	['[O-]C(=O)CC12CC3CC(C1)CC(C2)(C3)CC(=O)[O-]']	80	1.65333	Polar	equal	Converged
IVITOY_FSR	['12']	[30]	[2]	[2, 2]	[30 30]	vasp	[2.328]	0.006	0.00858	0.055	0	-0.00249	0	-5e-05	-0.00015	-0.00016	-0.01439	-1e-05	-0.00666	-0.00901	-0.01961	-0.02687	0	-0.00064	0	0.064216	m	C48-H34-N6-O8-Zn2	0.0290942	0.0713981	['[Zn]']	['Nc1cc(ccc1c1ccncc1)c1ccncc1', '[O-]C(=O)c1ccc(cc1)C(=O)[O-]']	98	1.34464	Polar	equal	Converged
UZEBAE01_FSR	['11']	[29]	[1]	[1, 1, 1, 1, 1, 1]	[29 29 29 29 29 29]	vasp	[0.708]	-1e-05	-0.00012	-0.00021	-0.06411	0	0	0	-2e-05	0	0	-0.04997	0	-0.00015	-0.00116	-0.00019	0	0	-0.01794	0.0641105	222	Cu6-H20-C24-S4-I2-O4	0.02366	0.05817	['[Cu]1[Cu][Cu]1', '[I]']		60	2.78026	Non-polar	equal	Converged
FITDAQ_FSR	['12']	[30]	[2]	[2, 2]	[30 30]	vasp	[1.918]	0.00011	4e-05	3e-05	0.0004	-4e-05	0.00777	0.04776	0.00893	0.03879	0	0.01456	0	0.0002	0.00011	0.00012	0.00358	3e-05	-0.00942	0.0638552	2	Zn2-H26-C20-N10-O8	0.113241	0.147002			66	1.17393	Polar	equal	Converged
QOGJAX_FSR	['1']	[19]	[1]	[1, 1]	[19 19]	vasp	[1.324]	0	0	0	-0.0101	0	-0.01635	0.04776	0.0258	0.02192	0	-0.02536	0	0	0	1e-05	0.00267	0	-0.0519	0.0637987	2	K2-H44-C34-N6-O12	0.0925119	0.0836773	['O', '[K]']		98	1.47873	Polar	equal	Converged
KERKEY_FSR	['14']	[50]	[4]	[4, 4, 4, 4]	[50 50 50 50]	vasp	[2.982]	0.03198	0.03369	0.0141	0	-0.01983	0	0	1e-05	-1e-05	0.01814	0	-0.01508	-0.00656	0.01994	0.01029	0	-0.04249	0	0.0633568	m	Sn4-H68-C56-S6-N12	0.0269044	0.0566471			146	1.64526	Polar	equal	Converged
WADHAL01_FSR	['7']	[25]	[2]	[2, 2, 2, 2]	[25 25 25 25]	vasp	[2.468]	-5e-05	-0.0001	0	0.06081	0	0	0	0	0	0	0.06335	0	0	0	0	0	0	0.05844	0.06335	222	Mn4-H32-C24-O32	0.06491	0.05316	['[OH2][Mn]']	['[O-]C(=O)CC(C(=O)[O-])(CC(=O)O)O']	92	2.06834	Non-polar	equal	Converged
LALTIC_FSR	['12']	[48]	[2]	[2, 2, 2, 2]	[48 48 48 48]	vasp	[2.437]	1e-05	-2e-05	-5e-05	0	0.0186	0	1e-05	2e-05	-1e-05	-0.01669	0	0	0.02157	-0.01165	0.05838	0	0	0	0.0633184	mm2	C64-Cd4-H48-N8-O20-S4	0.0120592	0.0727811	['[OH2][Cd]']	['[O-]C(=O)c1ccc(s1)C(=O)[O-]']	148	1.81204	Polar	equal	Converged
EDAWUE_FSR	['11']	[29]	[2]	[2, 2, 2, 2]	[29 29 29 29]	vasp	[1.711]	-1e-05	-1e-05	0	0.05775	0	0	1e-05	-1e-05	1e-05	0	0.06329	0	2e-05	0	7e-05	0	0	0.02912	0.06329	222	Cu4-P4-H48-C28-N4-O20	0.0264	0.06593	['[Cu]']	['[O-]C(=O)C1CCCN(C1)CP(=O)(O)[O]', '[O-]C(=O)C1CCCN(C1)CP(=O)([O])O']	108	1.94189	Non-polar	equal	Converged
RIVBOO_FSR	['12']	[48]	[2]	[2, 2]	[48 48]	vasp	[2.338]	2e-05	1e-05	2e-05	0	0.01827	0	0	-1e-05	0	-0.01152	0	0	-0.03786	0.03154	-0.03969	0	0	0	0.0632728	mm2	C60-Cd2-F12-H40-N4-O8	0.04174	0.0817161	['[Cd]']	['n1ccc(cc1)c1ccncc1']	126	1.58338	Polar	equal	Converged
NAASCB01_FSR	['1']	[11]	[1]	[1, 1, 1, 1]	[11 11 11 11]	vasp	[1.173]	-1e-05	-0.00017	0	-0.05568	0	0	0	-3e-05	-1e-05	0	-0.06302	0	0	2e-05	3e-05	0	0	-0.03672	0.06302	222	Na4-H28-C24-O24	0.06923	0.03706			80	1.83804	Non-polar	equal	Converged
XUHSOI_FSR	['12']	[48]	[2]	[2, 2]	[48 48]	vasp	[2.405]	-0.0001	5e-05	7e-05	0	0.04383	0	4e-05	-9e-05	-9e-05	0.04516	0	0	0.0133	-0.06101	0.0076	0	0	0	0.0629038	mm2	C12-Cd2-H20-N4-O10	0.10284	0.148	['[OH2][Cd]']	['C1N2CN3CN1CN(C2)C3', '[O-]C(=O)CC(=O)[O-]']	48	2.20077	Polar	equal	Converged
EBAVAG_FSR	['12']	[30]	[2]	[2, 2]	[30 30]	vasp	[2.22]	0	0	0	-0.0629	0	0	0	2e-05	-1e-05	0	-0.03811	0	-7e-05	-0.00038	-3e-05	0	0	-0.02363	0.0629	222	Zn2-H26-C38-S4-N14-O4	0.02053	0.04558	['[Zn]']	['O=C(c1cncc(c1)C(=O)Nc1cccnc1)Nc1cccnc1']	88	1.59684	Non-polar	equal	Converged
VAHRON_FSR	['fblock']	[57]	[3]	[3, 3]	[57 57]	vasp	[4.071]	-0.02559	0.02561	-1e-05	-0.05122	0	0	-0.00011	6e-05	-7e-05	3e-05	0.05117	0.02557	0.00013	0.00013	0.00013	0	0	0	0.0627234	32	C9-H18-La2-O24	0.105107	0.0822673	['[OH2][La]([OH2])[OH2]']	['[O-]C(=O)C(C(=O)[O-])(O)O']	53	2.26138	Non-polar	equal	Converged
RUVYIR_FSR	['12']	[30]	[2]	[2, 2]	[30 30]	vasp	[2.36]	-2e-05	-1e-05	0	0	-0.00602	0	-0.0004	-0.00017	1e-05	-0.03146	0	0	0.01981	-0.05256	0.02758	0	0	0	0.0625751	mm2	C44-H32-N4-O12-Zn2	0.1289	0.160361	['[Zn]']	['[O-]C(=O)CN1C=CC(=C2C1=CC=C[CH]2)[O]', '[O-]C(=O)CN1C=CC(=C2[C]1C=CC=C2)[O]']	94	1.65302	Polar	equal	Converged
BESNET_FSR	['12']	[80]	[2]	[2, 2]	[80 80]	vasp	[1.95]	2e-05	5e-05	-0.00017	-0.0007	0.00012	-0.04998	-0.0166	-0.04478	-0.03063	0	-0.02628	0	0	2e-05	1e-05	-0.01971	0	-0.00348	0.0625271	2	C36-Cl4-H32-Hg2-N4-O12	0.0625298	0.074432	['Cl[Hg]Cl']	['O=C(c1cccnc1)OC1COC2C1OCC2OC(=O)c1cccnc1']	90	2.08649	Polar	equal	Converged
DOZBAX_FSR	['fblock']	[70]	[3]	[3, 3, 3, 3]	[70 70 70 70]	vasp	[3.937]	0.00044	-0.00048	0.00012	-0.01586	0.01164	0.00026	-0.00065	-0.00035	-0.00036	-0.01174	-0.016	-2e-05	0.03872	-0.03873	2e-05	0	0	-0.0297	0.0623025	-4	C64-H44-N8-O20-Yb4	0.0583985	0.0872919	['[Yb]12[OH]3[Yb]4[OH]2[Yb]2[OH]1[Yb]3[OH]42']	['[O-]C(=O)c1cccc2c1cccc2', '[O-]C(=O)c1cnccn1']	140	2.20878	Non-polar	equal	Converged
LOTSUL01_FSR	['2']	[12]	[2]	[2, 2, 2]	[12 12 12]	vasp	[2.37]	-0.04069	0.04079	-7e-05	0.02338	0	0	0.00037	-0.00049	4e-05	-0.00036	-0.02339	0.04073	0	0	1e-05	0	0	0	0.0621874	32	Mg3-H12-C21-O15	0.0608436	0.122103	['[Mg]']	['[O-]C(=O)c1cc(O)c(c(c1)O)[O]']	51	1.30181	Non-polar	equal	Converged
PASKUS_FSR	['12']	[30]	[2]	[2, 2, 2, 2, 2, 2, 2, 2]	[30 30 30 30 30 30 30 30]	vasp	[2.054]	1e-05	1e-05	-1e-05	-0.0292	0	0	1e-05	-1e-05	0	0	-0.06215	0	0	-1e-05	-2e-05	0	0	-0.02054	0.06215	222	Zn8-P8-H48-C32-N16-O28	0.06441	0.03382	['[Zn]']	['CC(P(=O)([O])[O])(P(=O)([O])[O])O']	140	2.09627	Non-polar	equal	Converged
NOPFAA_FSR	['12']	[48]	[2]	[2, 2, 2, 2]	[48 48 48 48]	vasp	[2.679]	-0.00798	0.00134	0.00107	0	0.00517	0	0.0001	-8e-05	1e-05	0.02853	0	0	-0.0117	-0.01529	-0.05889	0	0	0	0.0619575	mm2	C28-Cd4-H24-N16-S8	0.0465828	0.0495114	['[Cd]']	['Nc1cccnc1', '[S]C#N']	80	1.99566	Polar	equal	Converged
LUWSOL_FSR	['12']	[30]	[2]	[2, 2, 2, 2]	[30 30 30 30]	vasp	[1.922]	-3e-05	0	1e-05	0	-0.01281	0	-1e-05	0	0	0.01962	0	0	0.02568	0.03771	-0.04175	0	0	0	0.0618431	mm2	Zn4-H60-C48-S4-N12-O16	0.16728	0.137913	['[Zn]']	['[O-]C(=O)c1cccc(c1)C(=O)[O-]']	144	1.73655	Polar	equal	Converged
UFATEA01_FSR	['10']	[28]	[2]	[2, 2]	[28 28]	vasp	[1.44]	2e-05	7e-05	2e-05	0	0.00435	0	2e-05	1e-05	2e-05	0.00966	0	0	-0.02011	0.04599	0.03577	0	0	0	0.0616359	mm2	Ni2-H16-C24-N4-O8	0.0526493	0.104502	['[Ni]']	['[O-]C(=O)c1ccncc1']	54	1.20659	Polar	equal	Converged
GUGWAI_FSR	['12']	[30]	[2]	[2, 2]	[30 30]	vasp	[2.513]	7e-05	-0.00011	-8e-05	0.00241	7e-05	-0.00304	0.00588	-0.05619	0.02229	0	0.00715	0	-6e-05	-0.00072	-1e-05	0.00917	4e-05	-0.01812	0.0611584	2	Zn2-H56-C40-N4-O14	0.0194021	0.0555462	['[OH2][Zn]']	['n1ccc(cc1)c1ccncc1']	116	1.43408	Polar	equal	Converged
WEMBEX_FSR	['12']	[48]	[2]	[2, 2]	[48 48]	vasp	[2.224]	0	4e-05	1e-05	-0.01861	0	0	3e-05	1e-05	-2e-05	0	-0.06107	0	0.00017	0.00056	0.0001	0	0	0.03832	0.06107	222	Cd2-H20-C20-N12-Cl4-O8	0.15568	0.117292			66	2.03344	Non-polar	equal	Converged
MEHCAG_FSR	['12']	[30]	[2]	[2, 2, 2, 2]	[30 30 30 30]	vasp	[2.251]	2e-05	0	1e-05	-0.06099	0	0	0	0	0	0	-0.03308	0	-1e-05	-1e-05	2e-05	0	0	-0.0045	0.06099	222	Zn4-H36-C56-N4-O20	0.03154	0.07166	['[Zn]']	['[O-]C(=O)c1cc(OCc2ccccn2)cc(c1)C(=O)[O-]']	120	1.62237	Non-polar	equal	Converged
CAFORM13_FSR	['2']	[20]	[2]	[2, 2, 2, 2]	[20 20 20 20]	vasp	[2.591]	-1e-05	5e-05	3e-05	-0.06095	0	0	5e-05	-1e-05	3e-05	0	0.06095	0	0	0	0	0	0	0	0.06095	422	Ca4-H8-C8-O16	0.01524	0.07619	['[Ca]']	['[O-]C=O']	36	1.99728	Non-polar	equal	Converged
FEQREA_FSR	['12']	[30]	[2]	[2, 2, 2, 2]	[30 30 30 30]	vasp	[2.471]	-1e-05	-1e-05	1e-05	0.01108	0	0.02295	0.05868	0.00782	-0.00962	0	0.00914	0	-5e-05	0	1e-05	-0.03263	-2e-05	0.01647	0.0606678	2	C36-H36-N4-O12-Zn4	0.0262873	0.0648167	['[Zn]']	['NC(C(=O)[O-])Cc1ccc(cc1)[O]']	92	1.95382	Polar	equal	Converged
ROJQEM01_FSR	['7']	[25]	[2]	[2, 2, 2, 2]	[25 25 25 25]	vasp	[2.249]	-6e-05	-2e-05	0	-0.06016	0	0	0	0	0	0	-0.03708	0	0	0	0	0	0	0.01791	0.06016	222	Mn4-H36-C20-N4-Cl8-O8	0.02978	0.03473	['Cl[Mn]Cl']	['[O-]C(=O)C1CCC[NH2]1']	80	1.84091	Non-polar	equal	Converged
QIKXEN_FSR	['12']	[30]	[2]	[2, 2, 2, 2]	[30 30 30 30]	vasp	[1.912]	0	0	-1e-05	-0.01829	0	0	0	-1e-05	1e-05	0	-0.05998	0	-1e-05	0	0	0	0	0.01923	0.05998	222	Zn4-H48-C28-S8-N16-O16	0.11078	0.08574	['[Zn]']	['[O-]C(=O)C=C(C(=O)[O-])C']	120	1.72149	Non-polar	equal	Converged
NUKNEN_FSR	['11']	[29]	[2]	[2, 2, 2, 2]	[29 29 29 29]	vasp	[1.728]	2e-05	-1e-05	-2e-05	0.02216	-1e-05	-0.05172	0.02549	0.00343	0.01051	0	-0.00396	0	-1e-05	0	1e-05	0.00118	1e-05	-0.02149	0.0598423	2	Cu4-H24-C36-O20	0.124533	0.17055	['[Cu][Cu]']	['[O-]C(=O)COc1ccc(cc1)C(=O)[O-]']	84	2.01542	Polar	equal	Converged
CIMZII_FSR	['12']	[30]	[2]	[2, 2, 2, 2]	[30 30 30 30]	vasp	[2.43]	-5e-05	-3e-05	-0.00019	-0.05984	0	0	-2e-05	4e-05	-4e-05	0	-0.05157	0	1e-05	-7e-05	-0.00015	0	0	0.03854	0.0598403	222	Zn4-H24-C16-O24	0.08669	0.0764202	['[OH2][Zn]']	['[O-]C(=O)CC(C(=O)[O-])O']	68	2.29666	Non-polar	equal	Converged
GEDLEI_FSR	['12']	[48]	[2]	[2, 2]	[48 48]	vasp	[2.525]	-0.00657	0.00249	-0.00883	0	0.00506	0	0	0	-2e-05	0.02894	1e-05	-0.02336	-0.00246	-0.01201	0.05678	0	0.0099	0	0.0594658	m	Cd2-H44-C60-N16-O8	0.0721793	0.0686554	['[Cd]']	['[O-]C(=O)c1ccc(cc1)n1c(C)nnc1c1cccnc1']	130	1.48549	Polar	equal	Converged
PACGAE_FSR	['12']	[30]	[2]	[2, 2, 2, 2]	[30 30 30 30]	vasp	[2.376]	0.03728	0.02623	-0.02608	0	-0.01718	0	-0.00018	0.0001	7e-05	0.03371	3e-05	0.02365	-0.03209	0.0066	0.00096	0	0.00158	0	0.0593755	m	C42-F12-H28-N12-O10-Zn4	0.136161	0.154632	['[OH2][Zn]', '[Zn]']	['C1=N[N]C=N1', '[N]1C=NN=C1', '[O-]C(=O)c1ccc(cc1)C(C(F)(F)F)(C(F)(F)F)c1ccc(cc1)C(=O)[O-]']	108	1.86082	Polar	equal	Converged
LOBNIA_FSR	['14']	[50]	[4]	[4, 4]	[50 50]	vasp	[3.007]	0	0	0	0	-0.02219	0	1e-05	-1e-05	0	-0.00332	0	0	0.0528	0.00349	-0.0268	0	0	0	0.0593149	mm2	C36-H44-O2-Sn2	0.0453853	0.0909454	['[OH]', '[Sn]']		84	1.62808	Polar	equal	Converged
INOKAZ_FSR	['1', '10']	[55, 28]	[1, 2]	[1, 1, 2, 2]	[55 55 28 28]	vasp	[1.343, 2.113]	4e-05	0	1e-05	-0.05916	0	0	1e-05	0	1e-05	0	0.05917	0	0	0	-1e-05	0	0	0	0.05917	622	Cs2-Ni2-H6-C6-O12	0.11152	0.17069	['[Cs]', '[Ni]']	['[O-]C=O']	28	2.78075	Non-polar	equal	Converged
VILKUX_FSR	['11']	[29]	[2]	[2, 2]	[29 29]	vasp	[1.738]	0.00013	4e-05	0.00012	0	0.001	0	7e-05	-0.00015	-0.00014	-0.02216	0	0	-0.04544	0.00655	0.03723	0	0	0	0.0591084	mm2	C40-Cl4-Cu2-H32-N8-O16-S8	0.09979	0.10079	['[Cu]']	['n1ccc(cc1)SSc1ccncc1']	110	1.6787	Polar	equal	Converged
SCNTAD_FSR	['1', '2']	[11, 20]	[1, 2]	[1, 1, 1, 1, 2, 2, 2, 2]	[11 11 11 11 20 20 20 20]	vasp	[1.194, 2.524]	0.00018	-8e-05	-8e-05	-0.05907	0	0	-7e-05	0.0002	-0.00011	0	-0.05907	0	-8e-05	-8e-05	0.00017	0	0	-0.05907	0.0590707	23	Na4-Ca4-H24-C24-N4-O24	0.05144	0.11051	['[Ca]', '[Na]']	['[O-]C(=O)CN(CC(=O)[O-])CC(=O)[O-]']	84	1.85203	Non-polar	equal	Converged
XECMUP_FSR	['12']	[48]	[2]	[2, 2, 2, 2]	[48 48 48 48]	vasp	[2.233]	0	0	0	-0.00718	0	0.03962	0.02435	0.04562	0.02745	0	-0.00094	0	0	0	-1e-05	0.02226	0	-0.02295	0.0585533	2	Cd4-H56-C24-I8-N8	0.04966	0.0811413			100	2.70465	Polar	equal	Converged
XAMWIR_FSR	['1']	[11]	[1]	[1, 1]	[11 11]	vasp	[1.274]	-1e-05	-4e-05	-8e-05	-0.05113	-5e-05	0.02723	-0.01086	-0.00483	-0.02345	0	-0.0333	0	-1e-05	1e-05	5e-05	0.01343	0	0.0106	0.0583665	2	Na2-H28-C24-S4-N6-O22	0.0615927	0.0750138	['O', '[Na]']		86	1.73523	Polar	equal	Converged
WISZUT01_FSR	['12']	[30]	[2]	[2, 2, 2]	[30 30 30]	vasp	[2.124]	-0.0134	0.01338	-0.00016	0.01516	-0.01602	-0.00939	-0.0094	0.00936	-0.00016	-0.01603	-0.01516	0.0134	0.01172	0.01172	0.05579	0	0	0	0.0582006	3	Zn3-H45-C36-N3-O12	0.0399473	0.0447728	['[OH2][Zn]']	['CC(C(C(=O)[O-])N=Cc1ccccc1[O])C']	99	1.634	Polar	equal	Converged
QIBBAH_FSR	['1']	[19]	[1]	[1, 1]	[19 19]	vasp	[1.139]	0	0	0	0	0.0073	0	0	0	0	-0.05259	0	0	0.02403	-0.01968	0.04851	0	0	0	0.0576018	mm2	C38-H30-K2-N4	0.0850597	0.12126			74	1.31025	Polar	equal	Converged
KAYPEF_FSR	['11']	[29]	[2]	[2, 2, 2, 2]	[29 29 29 29]	vasp	[1.404]	3e-05	0	-1e-05	0	0.01097	0	-4e-05	-0.00011	-0.00011	-0.0536	0	0	-0.03888	0.01272	-0.04034	0	0	0	0.0574527	mm2	Cu4-H40-C24-N12-Cl4-O8	0.11643	0.1274			92	1.89774	Polar	equal	Converged
KAKTIA01_FSR	['11']	[29]	[1]	[1, 1, 1, 1, 1, 1, 1, 1]	[29 29 29 29 29 29 29 29]	vasp	[1.041]	0.00021	8e-05	0.00011	-0.02466	0	0	0	0	1e-05	0	0.01565	0	3e-05	3e-05	4e-05	0	0	0.05732	0.05732	222	Cu8-H16-C24-N4-Cl4-O8	0.07409	0.0562306	['Cl[Cu][Cu]Cl', '[Cu][Cu]']	['[O-]C(=O)c1ccncc1']	64	2.6714	Non-polar	equal	Converged
BIGSUG_FSR	['14']	[50]	[4]	[4, 4, 4, 4]	[50 50 50 50]	vasp	[2.682]	-6e-05	4e-05	-0.0001	0.0571	0	0	-3e-05	-8e-05	0	0	-0.02036	0	4e-05	7e-05	0.00013	0	0	0.03232	0.0571001	222	Sn4-H44-C20-S4-N4-O8	0.04524	0.10114	['[Sn]']	['[O-]C(=O)C(C[S])N']	84	1.58763	Non-polar	equal	Converged
SIKYUI_FSR	['11']	[29]	[1]	[1]	[29]	vasp	[0.396]	0.00049	0.00033	0.00012	-0.00787	-0.00017	-0.05624	0.01529	-0.03522	0.00422	0	0.00834	0	-8e-05	-0.00012	-3e-05	-0.00688	3e-05	0.00563	0.0569829	2	C10-Cu1-H10-I1-O2-P2	0.212662	0.242636			26	2.18661	Polar	equal	Converged
YUMCER_FSR	['14']	[82]	[2]	[2, 2, 2, 2]	[82 82 82 82]	vasp	[2.99]	-0.0001	-7e-05	0	0	-0.04686	0	4e-05	7e-05	3e-05	0.05694	0	0	-0.00049	-0.01374	0.04687	0	0	0	0.0569401	mm2	H36-Pb4-C60-N4-O24	0.129803	0.17261			128	2.0817	Polar	equal	Converged
WEGLAX_FSR	['11']	[29]	[1]	[1, 1, 1, 1]	[29 29 29 29]	vasp	[0.487]	-0.00034	-0.00051	-0.0003	0	0.0043	0	0.00155	-0.00053	0.00121	-0.05682	0	0	0.01862	-0.04388	-0.0009	0	0	0	0.0568803	mm2	C28-Cu4-H16-N12-O4-S4	0.0854566	0.140902	['[Cu]']	['S=[C]1=NN=C(O1)c1cccnc1']	68	2.01632	Polar	equal	Converged
MISKOR_FSR	['1']	[3]	[1]	[1, 1, 1, 1]	[3 3 3 3]	vasp	[1.104]	2e-05	4e-05	-2e-05	-0.05685	0	0	0	0	0	0	-0.03179	0	0	0	0	0	0	-0.02834	0.05685	222	Li4-H36-C20-N4-Cl4-O8	0.04917	0.10602	['[Li]']	['[O-]C(=O)C1CCC[NH2]1']	76	1.42613	Non-polar	equal	Converged
NUVCUD_FSR	['fblock']	[57]	[3]	[3, 3, 3]	[57 57 57]	vasp	[4.414]	0.03877	-0.03884	-7e-05	-0.01478	0	0	-9e-05	-6e-05	2e-05	0.00012	0.01474	-0.039	0	0	0	0	0	0	0.0568341	32	La3-H6-C12-N9-O15	0.131928	0.18871	['O', '[La]']	['[O-]C(=O)C1=NN=N[C]1C(=O)[O-]']	45	2.28083	Non-polar	equal	Converged
IFIVIF01_FSR	['1']	[3]	[1]	[1, 1]	[3 3]	vasp	[1.283]	5e-05	-0.0001	4e-05	0.04243	0	-0.00173	-0.03109	0.03215	0.03202	0	-0.00397	0	-3e-05	-0.0001	-1e-05	0.02681	1e-05	0.04139	0.0568246	2	Li2-H32-C26-N2-O10	0.112579	0.0866475	['[Li]']	['COc1ccccc1C(=O)[O-]', '[O-]C(=O)C1CCC[NH2]1']	72	1.42468	Polar	equal	Converged
FIQBOW_FSR	['12']	[30]	[2]	[2, 2, 2, 2]	[30 30 30 30]	vasp	[2.066]	4e-05	-0.00019	-4e-05	0	0.01627	0	1e-05	-8e-05	-5e-05	0.05682	0	0	0.03507	0.02079	0.01317	0	0	0	0.0568201	mm2	Zn4-H32-C32-Cl8-O4	0.0887621	0.117946			80	1.79542	Polar	equal	Converged
SEBMER01_FSR	['2']	[38]	[2]	[2, 2, 2, 2]	[38 38 38 38]	vasp	[2.537]	0	1e-05	1e-05	-0.05672	0	0	0	0	0	0	-0.03374	0	0	1e-05	0	0	0	0.00013	0.05672	222	Sr4-H52-C20-N4-O28	0.00508	0.05229	['[OH2][Sr]([OH2])[OH2]']	['[O-]C(=O)CCC(C(=O)[O-])N']	108	1.99828	Non-polar	equal	Converged
FIRGIW_FSR	['12']	[30]	[2]	[2, 2, 2, 2]	[30 30 30 30]	vasp	[2.055]	-8e-05	9e-05	3e-05	0.05669	0	0	0	-3e-05	-1e-05	0	0.01967	0	3e-05	-3e-05	-2e-05	0	0	0.03332	0.0566901	222	Zn4-H24-C16-N4-Cl4-O16	0.01768	0.0581201	['Cl[Zn]']	['[O-]C(=O)CC(C(=O)[O-])[NH3]']	68	2.15935	Non-polar	equal	Converged
IVOQEQ_FSR	['11']	[29]	[2]	[2, 2, 2, 2]	[29 29 29 29]	vasp	[1.53]	3e-05	-2e-05	-2e-05	0.00581	0	0	-1e-05	2e-05	-1e-05	0	0.027	0	-2e-05	-7e-05	0.00011	0	0	-0.05599	0.0559902	222	Cu4-H44-C72-N4-O12	0.03195	0.0861101	['[Cu]']	['[O-]C(=O)c1ccccc1N=Cc1c([O])ccc2c1cccc2']	136	1.70269	Non-polar	equal	Converged
EJINOB_FSR	['12']	[30]	[2]	[2, 2]	[30 30]	vasp	[2.206]	1e-05	1e-05	6e-05	0.0062	-2e-05	0.02244	0.03135	-0.0423	0.0115	0	0.01316	0	0	0	4e-05	0.03238	1e-05	-0.00616	0.0554757	2	Zn2-H26-C40-N8-Cl2-O6	0.0677276	0.121426	['[OH2][Zn]Cl']	['[O-]C(=O)c1ccccc1c1nc2c([nH]1)c1cccnc1c1c2cccn1']	84	1.81108	Polar	equal	Converged
MUQWUS_FSR	['1']	[3]	[1]	[1, 1, 1, 1]	[3 3 3 3]	vasp	[1.212]	0.00031	0.00026	0.00043	0.05547	0	0	-1e-05	-1e-05	-1e-05	0	0.04622	0	-1e-05	1e-05	2e-05	0	0	-0.02384	0.0554731	222	Li4-H32-C56-N4-O24	0.04833	0.0227577	['[Li][OH2]']	['O=C1c2ccccc2C(=O)c2c1c(ccc2[O])N(=O)=O']	120	1.62383	Non-polar	equal	Converged
DUTJUZ_FSR	['12']	[30]	[2]	[2, 2, 2]	[30 30 30]	vasp	[2.916]	-0.00027	0.00027	0	-0.00026	0.01928	0.02525	0.02536	-0.02537	0	0.01923	0	0	0.0346	0.0346	0.02491	0	0	0	0.0549075	3m	C30-H24-N14-O6-Zn3	0.0397691	0.0803103	['[Zn]']	['C1CN2CCN1CC2', '[O-]C(=O)c1ccc(cc1)C1=NN=N[N]1']	77	0.846009	Polar	equal	Converged
GOTJAA_FSR	['1']	[37]	[1]	[1, 1, 1, 1]	[37 37 37 37]	vasp	[1.486]	0	0	0	-0.01254	1e-05	0.00088	0.05031	-0.02168	-0.00071	0	0.00225	0	1e-05	-2e-05	-1e-05	0.00789	0	0.01344	0.0548333	2	Rb4-H40-C56-S8-N4-O32	0.0916028	0.144993	['[Rb]']	['OC(=O)c1ccc(cc1)S(=O)(=O)[N]S(=O)(=O)c1ccc(cc1)C(=O)O']	144	1.94646	Polar	equal	Converged
XIJXAS_FSR	['1']	[19]	[1]	[1, 1, 1, 1]	[19 19 19 19]	vasp	[1.276]	0	0	0	0.03856	0	0	0	0	0	0	0.05461	0	0	0	0	0	0	0.02992	0.05461	222	K4-H20-C16-O24	0.02269	0.06932			64	1.96672	Non-polar	equal	Converged
FODRIA_FSR	['12']	[30]	[2]	[2, 2, 2, 2]	[30 30 30 30]	vasp	[2.306]	-0.00025	-0.00011	-0.00022	-0.01343	-0.00031	-0.04221	-0.04451	0.01812	0.02561	0	-0.00384	0	-0.0004	-9e-05	-0.00056	0.0246	-0.00032	0.0132	0.0545904	2	Zn4-H28-C24-N28-O4	0.037387	0.0843433	['[Zn]']	['[N][N][N]']	88	1.80252	Polar	equal	Converged
LEKMIA_FSR	['13']	[49]	[3]	[3]	[49]	vasp	[3.409]	0.01544	-0.01549	0	0.00577	-0.00768	-0.01677	-0.01656	0.01661	-5e-05	-0.00796	-0.00576	-0.01559	0.0218	0.0218	-0.04474	0	0	0	0.0543337	3	C21-H12-In1-O7-P1	0.108347	0.0951849	['[In]']	['[O-]C(=O)c1ccc(cc1)P(=O)(c1ccc(cc1)C(=O)[O-])c1ccc(cc1)C(=O)[O-]']	42	1.54282	Polar	equal	Converged
RUBDOI_FSR	['12']	[30]	[2]	[2, 2]	[30 30]	vasp	[2.21]	-0.00563	-0.035	-0.02486	0	-0.00252	0	-1e-05	-1e-05	0	0.05429	-1e-05	-0.00212	-0.01581	-0.01753	-0.00983	0	-0.00042	0	0.0543314	m	C44-H36-N8-O8-Zn2	0.0898438	0.104789	['[Zn]']	['[O-]C(=O)c1ccc(cc1)Cn1cncc1']	98	1.53005	Polar	equal	Converged
FAPFIN_FSR	['12']	[48]	[2]	[2, 2, 2, 2]	[48 48 48 48]	vasp	[2.648]	0	-2e-05	-1e-05	0.05426	0	0	0	1e-05	0	0	0.0223	0	4e-05	5e-05	7e-05	0	0	-0.00255	0.05426	222	Cd4-H24-C32-S8-N20	0.01082	0.05947	['[Cd]']	['[S]C#N', 'c1ccncn1']	88	1.92144	Non-polar	equal	Converged
FUQFAA_FSR	['12']	[30]	[2]	[2, 2, 2, 2]	[30 30 30 30]	vasp	[1.868]	-1e-05	1e-05	1e-05	0.02606	0	0	0	0	0	0	0.05423	0	-1e-05	0	0	0	0	0.00443	0.05423	222	Zn4-H48-C40-Se4-N8-Cl8	0.04654	0.0652	['Cl[Zn]Cl']	['CN1[C]([Se])CCC1c1cccnc1']	112	1.95695	Non-polar	equal	Converged
XUNTEH_FSR	['1']	[3]	[1]	[1, 1, 1, 1]	[3 3 3 3]	vasp	[1.166]	4e-05	6e-05	3e-05	0	-0.01305	0	-0.0001	-0.00016	-2e-05	-0.01691	0	0	-0.01432	-0.04154	-0.03167	0	0	0	0.0541632	mm2	Li4-H16-C24-N4-O8	0.109677	0.121911	['[Li]']	['[O-]C(=O)c1ccncc1']	56	1.17732	Polar	equal	Converged
NAMDAH_FSR	['12']	[48]	[2]	[2, 2, 2, 2]	[48 48 48 48]	vasp	[2.269]	0	0	0	-0.01938	0	0	-1e-05	0	0	0	0.05403	0	0	0	0	0	0	0.0192	0.05403	222	Cd4-H36-C20-S4-N4-O20	0.0127	0.04133	['[OH2][Cd]']	['[O-]C(=O)CSCC(C(=O)[O-])N']	88	1.98032	Non-polar	equal	Converged
VIWYUW_FSR	['1', '2']	[11, 38]	[1, 2]	[1, 1, 1, 1, 2, 2, 2, 2]	[11 11 11 11 38 38 38 38]	vasp	[1.215, 2.517]	-4e-05	5e-05	0.00027	-0.05397	0	0	0.00037	-7e-05	-6e-05	0	-0.05394	0	-1e-05	0.00029	-3e-05	0	0	-0.0539	0.0539707	23	Na4-Sr4-H24-C24-N4-O24	0.03322	0.0871904	['[Na]', '[Sr]']	['[O-]C(=O)CN(CC(=O)[O-])CC(=O)[O-]']	84	2.08731	Non-polar	equal	Converged
IXAJIB_FSR	['6', '12']	[24, 30]	[0, 2]	[0, 0, 0, 0, 2, 2]	[24 24 24 24 30 30]	vasp	[-2.538, 2.218]	-3e-05	-1e-05	-5e-05	0.02723	0	0.00527	0.01351	0.02608	0.03914	0	0.02165	0	3e-05	1e-05	1e-05	0.02111	-4e-05	-0.0059	0.0535103	2	C66-Cr4-H48-N4-O20-Zn2	0.0792883	0.0710078	['[Zn]']	['C(Cc1ccncc1)Cc1ccncc1']	144	1.62953	Polar	equal	Converged
YIWKUN_FSR	['12']	[48]	[2]	[2]	[48]	vasp	[2.736]	-0.03115	0.01038	-0.0151	-0.01592	0.00691	-0.00489	-0.0265	-0.00144	-0.02127	0.00346	0.0097	-0.0052	-0.01581	-0.00511	-0.009	-0.00513	-0.01706	-0.00033	0.0535012	1	Cd1-H40-C28-S2-N4-O10	0.0103893	0.0509179	['[Cd]']	['CCC(Oc1cc(c(cc1c1ccncc1)OC(CC)C)c1ccncc1)C']	85	1.53816	Polar	equal	Converged
LALYOO_FSR	['12']	[48]	[2]	[2, 2, 2, 2, 2, 2]	[48 48 48 48 48 48]	vasp	[2.472]	0	-0.00069	-3e-05	-0.00048	0.02275	0.00308	0.0037	-0.00322	5e-05	0.02371	0	0	0.02174	0.02174	0.04336	0	0	0	0.0531557	3m	C42-Cd6-Cl6-H36-N6-O12-S6	0.110054	0.106158	['Cl[Cd]']	['[O-]C(=O)CSc1ccncc1']	114	2.02489	Polar	equal	Converged
JEGCAC_FSR	['12']	[30]	[2]	[2, 2]	[30 30]	vasp	[2.141]	0.01112	0.00502	0.01085	0	0.01405	0	7e-05	6e-05	9e-05	-0.00019	0.0001	0.00255	-0.02819	-0.00534	-0.02351	0	-0.03071	0	0.0526806	m	C40-H32-N4-O8-Zn2	0.00071438	0.0528007	['[Zn]']	['[O-]C(=O)c1ccc(cc1)C(=O)[O-]']	86	1.57747	Polar	equal	Converged
MARFUH_FSR	['11']	[29]	[1]	[1, 1, 1, 1]	[29 29 29 29]	vasp	[0.651]	5e-05	2e-05	6e-05	0.02204	0	0	-1e-05	-2e-05	-3e-05	0	-0.01274	0	-3e-05	0.00012	-3e-05	0	0	0.05255	0.0525502	222	Cu4-H24-C28-S12-I4-O16	0.01925	0.0333002			88	2.50542	Non-polar	equal	Converged
XIDCET_FSR	['1']	[55]	[1]	[1, 1]	[55 55]	vasp	[1.213]	-0.00058	-2e-05	-0.00022	0	0.00594	0	-2e-05	-2e-05	-2e-05	0.00925	0	0	0.03997	-0.01113	0.03209	0	0	0	0.0524555	mm2	C28-Cs2-H16-N4-P2-S4	0.137318	0.159943			56	1.88726	Polar	equal	Converged
CECSAF_FSR	['12']	[48]	[2]	[2, 2, 2, 2]	[48 48 48 48]	vasp	[2.571]	0	0	2e-05	0	0.05236	0	-1e-05	0	6e-05	0.04747	0	0	-0.01732	-0.01524	0.03851	0	0	0	0.05236	mm2	Cd4-H32-C32-N24-O24	0.04688	0.0720031	['[Cd]']	['c1ccncn1']	116	2.1949	Polar	equal	Converged
GAMTUM_FSR	['13']	[49]	[3]	[3, 3, 3, 3]	[49 49 49 49]	vasp	[2.54]	3e-05	1e-05	3e-05	-0.04254	3e-05	-0.0143	-0.0056	0.01215	0.0167	0	-0.01448	0	2e-05	2e-05	0	0.03037	1e-05	-0.01528	0.0523548	2	In4-H68-C60-S8	0.0142907	0.0380744			140	1.699	Polar	equal	Converged
XOBGOK_FSR	['13']	[81]	[1]	[1, 1, 1, 1]	[81 81 81 81]	vasp	[1.735]	-1e-05	-3e-05	0	-0.05234	0	0	0	0	0	0	-0.03876	0	0	1e-05	0	0	0	0.03984	0.05234	222	Tl4-B4-H24-C16-N24	0.07189	0.10134			72	2.81217	Non-polar	equal	Converged
GETWEJ_FSR	['14']	[82]	[2]	[2, 2]	[82 82]	vasp	[3.231]	0	-1e-05	0	0.05213	0	0	-1e-05	-0.00015	0	0	0.00741	0	-2e-05	-5e-05	1e-05	0	0	-0.02996	0.05213	222	C16-H8-N8-O4-Pb2	0.04436	0.05226	['[Pb]']	['[O-]C(=O)c1ccc(cc1)C1=NN=N[N]1']	38	2.89144	Non-polar	equal	Converged
UKEWOX_FSR	['1', '3']	[11, 39]	[1, 3]	[1, 1, 3, 3]	[11 11 39 39]	vasp	[1.264, 4.13]	-1e-05	6e-05	-2e-05	-0.00979	0	0	-9e-05	0.00161	-0.0003	0	0.05199	0	-3e-05	-5e-05	4e-05	0	0	0.00921	0.0520159	222	C36-H32-Na2-O24-Y2	0.05986	0.0147302			96	1.79406	Non-polar	equal	Converged
IRORUD_FSR	['11']	[29]	[2]	[2, 2]	[29 29]	vasp	[1.507]	-2e-05	-2e-05	0	0.0084	0	-0.011	-0.02858	-0.04124	0.01363	0	0.00107	0	1e-05	0	1e-05	0.01403	0	-0.00877	0.0520046	2	Cu2-H44-C48-N4-O14	0.0818157	0.0752435	['[OH2][Cu]']	['[O-]C(=O)COc1ccc2c(c1)cc(cc2)OCC(=O)[O-]']	112	1.54021	Polar	equal	Converged
BEDWEN_FSR	['14']	[50]	[4]	[4, 4, 4, 4]	[50 50 50 50]	vasp	[2.787]	1e-05	1e-05	0	0.02176	0	0	0	0	-1e-05	0	-0.00074	0	0	0	-3e-05	0	0	-0.05198	0.05198	222	Sn4-H76-C44-S4-N4-O12	0.0308	0.02344	['[Sn]']	['[S]CC(C(=O)N1CCCC1C(=O)[O-])C']	144	1.63998	Non-polar	equal	Converged
CDLGLU10_FSR	['12']	[48]	[2]	[2, 2, 2, 2]	[48 48 48 48]	vasp	[2.22]	-0.0001	-9e-05	2e-05	0.02725	0	0	-1e-05	0	0	0	-0.04319	0	0	0	0	0	0	0.05183	0.05183	222	Cd4-H36-C20-N4-O20	0.12905	0.1652	['[OH2][Cd]']	['[O-]C(=O)CCC(C(=O)[O-])N']	84	2.32008	Non-polar	equal	Converged
NEZQER_FSR	['1']	[3]	[1]	[1, 1, 1, 1, 1, 1]	[3 3 3 3 3 3]	vasp	[1.235]	-0.01059	0.01086	9e-05	-0.01536	-0.01596	0.02077	0.0202	-0.0207	-8e-05	-0.01602	0.0153	0.01093	0.03326	0.03326	-0.02155	0	0	0	0.0517407	3	Li6-H42-C39-O15	0.180943	0.200876	['[Li]']	['[O]c1ccc2c(c1)ccc(c2)C(=O)[O-]']	102	1.17009	Polar	equal	Converged
RODXEO_FSR	['12']	[80]	[2]	[2, 2, 2, 2]	[80 80 80 80]	vasp	[1.95]	0	0	0	-0.05159	0	0	0	0	0	0	0.0096	0	0	0	0	0	0	-0.00065	0.05159	222	Hg4-H56-C40-Br8-N8	0.03282	0.05811			116	2.68886	Non-polar	equal	Converged
HXTPSN01_FSR	['14']	[50]	[4]	[4, 4, 4, 4]	[50 50 50 50]	vasp	[3.237]	0	0	0	-0.014	0	0	1e-05	0	-1e-05	0	-0.00616	0	-1e-05	0	0	0	0	0.05147	0.05147	222	Sn4-H64-C72-O4	0.03577	0.04977	['[OH]', '[Sn]']		144	1.64955	Non-polar	equal	Converged
KIJSII_FSR	['12']	[30]	[2]	[2, 2, 2, 2]	[30 30 30 30]	vasp	[2.089]	0.00014	3e-05	1e-05	-0.02782	5e-05	-0.0253	-0.00257	0.02601	0.02285	0	0.03582	0	6e-05	4e-05	8e-05	0.03873	5e-05	0.00321	0.0512043	2	Zn4-H56-C32-N8-Cl8-O8	0.056684	0.0696644	['Cl[Zn]Cl']	['CCC(N1CCCC1=O)C(=O)N']	116	1.70284	Polar	equal	Converged
MUZQII_FSR	['12']	[30]	[2]	[2, 2]	[30 30]	vasp	[2.136]	-0.00018	-2e-05	-0.00019	-0.00721	-4e-05	0.01284	-0.00547	-0.00761	-0.05018	0	0.00188	0	7e-05	2e-05	3e-05	0.02008	0	-0.02	0.0510828	2	Zn2-H56-C48-N8-O8	0.0347544	0.0691197	['[Zn]']	['[O-]C(=O)C1CCC(C1(C)C)(C)C(=O)[O-]', 'c1ncn(c1)Cc1ccc(cc1)Cn1cncc1']	122	1.51623	Polar	equal	Converged
XEZXOQ_FSR	['1']	[19]	[1]	[1, 1, 1, 1, 1, 1, 1, 1]	[19 19 19 19 19 19 19 19]	vasp	[1.26]	0.00051	-0.00022	0.00017	0.00444	0	0	1e-05	0	0	0	0.05099	0	1e-05	-2e-05	2e-05	0	0	0.0209	0.05099	222	K8-H16-C12-N8-O28	0.03239	0.05329	['[OH2][K][OH2][K]']	['[O]N1[N]OC(=O)[C]1C(=O)[O-]']	72	2.03979	Non-polar	equal	Converged
MEHVIH_FSR	['12']	[30]	[2]	[2, 2, 2, 2]	[30 30 30 30]	vasp	[2.153]	-4e-05	-0.00012	3e-05	0	-0.02682	0	0.00106	0.00027	-0.00022	0.03179	0	0	-0.04276	0.02757	-0.00195	0	0	0	0.0509236	mm2	C48-Cl4-H32-N12-O4-Zn4	0.0796818	0.129243	['Cl[Zn]']	['[O-][n+]1ccc(cc1)C1=Nc2c([N]1)cccc2']	104	1.78907	Polar	equal	Converged
FAZWOS_FSR	['11']	[29]	[1]	[1, 1, 1, 1]	[29 29 29 29]	vasp	[0.679]	-0.0002	1e-05	-0.00086	-0.05088	0	0	-8e-05	0	-0.00017	0	-0.00402	0	0	0	-1e-05	0	0	-0.0008	0.0508877	222	Cu4-H28-C24-N4-Cl4	0.0571	0.0563	['[Cu]']	['CC(=CC#N)C=C']	64	1.86584	Non-polar	equal	Converged
JOLSEK_FSR	['12']	[48]	[2]	[2, 2]	[48 48]	vasp	[2.845]	0	0	0	-0.01525	-2e-05	-0.01509	0.0018	0.04866	-0.00908	0	-0.01082	0	-1e-05	-1e-05	0	-0.01191	4e-05	0.01271	0.0507006	2	Cd2-P4-H68-C60-N4-O12	0.0260536	0.0502028	['[Cd]']	['[O]P(=O)(c1ccccc1)c1ccccc1']	150	1.60279	Polar	equal	Converged
NENLIB_FSR	['12', '6']	[30, 42]	[2, 6]	[2, 2, 2, 6, 6, 6]	[30 30 30 42 42 42]	vasp	[2.51, 4.583]	0.02186	-0.02164	0.00046	-0.03991	0	0	-0.00063	0.00032	-0.00019	0.00115	0.04055	-0.0218	0	0	-7e-05	0	0	0	0.0504931	32	Zn3-Mo3-H24-C12-N6-O12-F12	0.02465	0.0359941	['[OH2][Zn][OH2]']	['n1ccncc1']	72	2.59983	Non-polar	equal	Converged
NOBMAT_FSR	['12']	[48]	[2]	[2, 2, 2, 2]	[48 48 48 48]	vasp	[2.727]	-0.00031	-0.00017	-5e-05	-0.00859	0	0	0	0	3e-05	0	-0.05043	0	0	0	1e-05	0	0	0.00129	0.05043	222	Cd4-H16-C24-S12-N8-O16	0.11752	0.102911	['[Cd]']	['[O-]C(=O)CSc1nnc(s1)SCC(=O)[O-]']	80	2.49191	Non-polar	equal	Converged
QESYUJ_FSR	['11']	[29]	[1]	[1, 1, 1, 1]	[29 29 29 29]	vasp	[0.427]	-1e-05	-1e-05	-3e-05	0.00984	0	-0.02602	-0.00425	-0.00933	-0.0493	0	0.00047	0	-2e-05	-6e-05	9e-05	-0.00721	3e-05	0.00463	0.050357	2	Br4-C32-Cu4-H40-N8	0.0469782	0.0556706	['Br[Cu]Br', '[Cu]', '[Cu]Br']	['CC1(C)Cc2nnc3c4c2c(C1)nnc4CC(C3)(C)C']	88	1.80038	Polar	equal	Converged
RAJSIG_FSR	['9']	[27]	[2]	[2, 2]	[27 27]	vasp	[1.587]	-1e-05	-1e-05	0	-0.00193	0	-0.00112	0.00947	0.02886	0.03774	0	-0.01356	0	0	0	0	0.02651	0	0.00057	0.0503067	2	Co2-H44-C28-N4-Cl4-O2	0.0564894	0.0805376			84	1.44306	Polar	equal	Converged
ECIHIK_FSR	['12']	[30]	[2]	[2, 2]	[30 30]	vasp	[2.02]	7e-05	0.00014	-7e-05	-0.02573	0	0	0	0	1e-05	0	0.03776	0	0	0	0	0	0	0.0503	0.0503	222	Zn2-H24-C16-N20-O8	0.12509	0.16927	['[Zn]']	['[O-]C(=O)C(n1nnnc1N)C']	70	1.79981	Non-polar	equal	Converged
LAPJAQ_FSR	['12']	[48]	[2]	[2, 2]	[48 48]	vasp	[2.426]	-0.00079	-0.00108	0.00045	0.00631	4e-05	-0.02152	-0.02195	-0.04004	-0.02098	0	0.00089	0	0.00025	-4e-05	-0.00029	-0.02	1e-05	0.02699	0.0502739	2	Cd2-H44-C36-S2-N12-O18	0.104267	0.108049	['[OH2][Cd]([OH2])[OH2]']	['O=C(Nc1cccnc1)Nc1cccc(c1)NC(=O)Nc1cccnc1']	114	1.66833	Polar	equal	Converged
VOCXUH_FSR	['9']	[27]	[3]	[3, 3, 3]	[27 27 27]	vasp	[0.621]	-0.03404	0.03682	0.00016	0	0	0	2e-05	0	0	0	0	0.03545	-1e-05	-1e-05	0	0	0	0	0.0501444	-6m2	Co3-H33-C57-N6-O18	0.0860973	0.0360457	['[Co]']	['[O-]C(=O)c1cc(cc(c1)C(=O)[O-])C(=O)[O-]', 'n1ccc(cc1)c1ccncc1']	117	0.817132	Non-polar	equal	Converged
UKEWIR_FSR	['1', '3']	[11, 39]	[1, 3]	[1, 1, 3, 3]	[11 11 39 39]	vasp	[1.231, 3.979]	-1e-05	0.0001	0	-0.03971	0	0	-0.0003	-1e-05	-2e-05	0	0.05012	0	-6e-05	-0.00011	3e-05	0	0	0.00163	0.0501209	222	C24-H24-Na2-O24-Y2	0.0352	0.0229004			76	1.95934	Non-polar	equal	Converged
BOXMAE_FSR	['2']	[38]	[2]	[2, 2, 2, 2]	[38 38 38 38]	vasp	[2.728]	0.00012	-0.00014	-0.00016	-0.01101	0	0	-7e-05	5e-05	2e-05	0	-0.04997	0	-3e-05	-3e-05	-0.0001	0	0	-0.00568	0.0499701	222	Sr4-H20-C28-N4-O20	0.00557	0.0444001	['[OH2][Sr]']	['[O-]C(=O)c1ccnc(c1)C(=O)[O-]']	76	2.08307	Non-polar	equal	Converged
EQOBUH_FSR	['9']	[27]	[2]	[2, 2, 2, 2]	[27 27 27 27]	vasp	[1.703]	3e-05	1e-05	5e-05	0	-0.02267	0	-4e-05	-5e-05	-3e-05	0.01736	0	0	-0.04561	0.00377	-0.01998	0	0	0	0.0499369	mm2	C24-Co4-H24-N16	0.14806	0.179561	['[Co]']	['C1=C[N]C=N1', 'C1=N[CH]C=N1']	68	1.25389	Polar	equal	Converged
NELMID_FSR	['12']	[48]	[2]	[2, 2, 2, 2, 2, 2, 2, 2]	[48 48 48 48 48 48 48 48]	vasp	[2.5]	-2e-05	5e-05	2e-05	0.01234	0	0	1e-05	2e-05	0	0	0.04983	0	-1e-05	-5e-05	-1e-05	0	0	-0.03093	0.04983	222	Cd8-H36-C44-N12-O32	0.01829	0.04324	['[Cd]', '[OH2][Cd][OH2]']	['[N]1C=NN=C1', '[O-]C(=O)c1cc(ccc1C(=O)[O-])C(=O)[O-]']	132	2.24445	Non-polar	equal	Converged
MISKUX_FSR	['1']	[3]	[1]	[1, 1, 1, 1]	[3 3 3 3]	vasp	[1.123]	1e-05	2e-05	-4e-05	-0.03346	0	0	0	0	0	0	-0.02304	0	0	0	0	0	0	-0.04935	0.04935	222	Li4-H36-C20-Br4-N4-O8	0.05382	0.08728	['[Li]']	['[O-]C(=O)C1CCC[NH2]1']	76	1.79751	Non-polar	equal	Converged
BUTCUQ_FSR	['1']	[19]	[1]	[1, 1, 1, 1]	[19 19 19 19]	vasp	[1.239]	0	0	0	0.01468	0	0	0	-1e-05	0	0	-0.00684	0	2e-05	2e-05	-2e-05	0	0	0.04932	0.04932	222	K4-H52-C20-S4-O36	0.01874	0.06806	['[K]', '[OH2][K][OH2]']	['OCC(C(C(C(S([O])([O])[O])O)O)O)O']	116	1.84836	Non-polar	equal	Converged
XEBNEX_FSR	['11']	[29]	[1]	[1, 1, 1, 1]	[29 29 29 29]	vasp	[0.405]	0.00029	6e-05	0.00025	-0.03251	0	0	0	0	0	0	0.00928	0	-2e-05	0	-2e-05	0	0	0.04927	0.04927	222	Cu4-H40-C20-I4-N8	0.11194	0.12122	['[Cu]I']	['CC1C[N]CC[N]1']	76	2.39663	Non-polar	equal	Converged
QAHKUH_FSR	['12']	[48]	[2]	[2, 2]	[48 48]	vasp	[3.008]	0	0	-1e-05	0	-0.0135	0	-1e-05	-1e-05	-1e-05	-0.0136	0	0	-0.01088	-0.01562	-0.04528	0	0	0	0.0491186	mm2	C56-Cd2-Cl12-H40-N8-O8	0.0199346	0.0446271	['[Cd]']	['n1ccc(cc1)C=Cc1ccncc1']	126	1.65548	Polar	equal	Converged
ODEQET01_FSR	['12']	[48]	[2]	[2, 2]	[48 48]	vasp	[2.528]	-1e-05	-1e-05	-1e-05	0	0.03045	0	1e-05	2e-05	1e-05	-0.03029	0	0	0.03465	-0.03472	-2e-05	0	0	0	0.049052	-42m	Cd2-H12-C20-Br12-N4	0.0388484	0.0102037			50	3.06446	Non-polar	equal	Converged
ODEQET01_FSR	['12']	[48]	[2]	[2, 2]	[48 48]	vasp	[2.528]	-1e-05	-1e-05	-1e-05	0	0.03045	0	1e-05	2e-05	1e-05	-0.03029	0	0	0.03465	-0.03472	-2e-05	0	0	0	0.049052	-42m	Cd2-H12-C20-Br12-N4	0.0388484	0.0102037			50	3.06446	Non-polar	equal	Converged
KOGHEU_FSR	['12']	[48]	[2]	[2, 2, 2, 2]	[48 48 48 48]	vasp	[2.517]	2e-05	0.00015	2e-05	0.03101	0	0	0	1e-05	0	0	-0.04645	0	0	0	0	0	0	0.04888	0.04888	222	Cd4-H16-C16-O20	0.01938	0.06826	['[Cd]']	['[O-]C(=O)CC(C(=O)[O-])O']	56	2.77086	Non-polar	equal	Converged
RUVBER_FSR	['12']	[48]	[2]	[2, 2]	[48 48]	vasp	[2.424]	1e-05	-1e-05	0	0	-0.0233	0	0	-1e-05	0	-0.04849	0	0	-0.01169	-0.03808	0.00767	0	0	0	0.04849	mm2	Cd2-H24-C36-N12-O8	0.0758974	0.11636	['[Cd]']	['[O-]C(=O)c1ccc(cc1)n1cnnc1']	82	1.18062	Polar	equal	Converged
LUKHEE01_FSR	['12']	[30]	[2]	[2, 2]	[30 30]	vasp	[2.09]	0.02809	0.01887	0.02883	0	-0.01901	0	9e-05	8e-05	3e-05	-0.02367	0	-0.04128	-0.03154	0.03149	0.00672	0	-0.00177	0	0.0484876	m	Zn2-H24-C28-N8-O8	0.0912057	0.0791284	['[Zn]']	['[O-]C(=O)c1ccccc1C(=O)[O-]']	70	1.53098	Polar	equal	Converged
TEKRIM_FSR	['2']	[20]	[2]	[2]	[20]	vasp	[2.786]	0.00014	-3e-05	4e-05	-0.01506	3e-05	-0.02296	-0.0164	0.01543	0.02554	0	-0.03449	0	-0.00014	3e-05	-0.00021	0.00035	3e-05	-0.00484	0.0484655	2	C34-Ca1-H28-N2-O8-P2	0.0518689	0.0698571	['[Ca]']	['[O]P(=O)(Oc1ccccc1)Oc1ccccc1']	75	1.48962	Polar	equal	Converged
DUKYOZ_FSR	['12']	[48]	[2]	[2, 2]	[48 48]	vasp	[2.494]	0	1e-05	0	0	-0.02933	0	0	0	0	0.00664	0	0	-0.01587	-0.03063	-0.03373	0	0	0	0.0482469	mm2	Cd2-H40-C44-N8	0.0354215	0.0563229	['[Cd]']	['C[C]1N=NC(=C1c1ccc(cc1)c1ccc(cc1)C1=C(C)N=N[C]1C)C']	94	1.4572	Polar	equal	Converged
CIJVOH_FSR	['12']	[48]	[2]	[2, 2, 2, 2, 2, 2, 2, 2]	[48 48 48 48 48 48 48 48]	vasp	[2.335]	0	0	0	0.04799	0	-0.0002	-0.00058	-0.00062	-0.00147	0	0.0287	0	0	0	0	-0.00171	1e-05	0.01289	0.0480253	222	Cd8-H56-C16-S4-O60	0.02152	0.0695316			144	2.36353	Non-polar	equal	Converged
JAKROD_FSR	['11']	[29]	[1]	[1, 1, 1, 1, 1, 1, 1, 1, 1, 1, 1, 1]	[29 29 29 29 29 29 29 29 29 29 29 29]	vasp	[0.361]	0	1e-05	0	0.04799	0	0	3e-05	2e-05	2e-05	0	0.00416	0	2e-05	3e-05	1e-05	0	0	0.01208	0.04799	222	Cu12-H36-C48-S12-N24	0.01252	0.03631	['[Cu][Cu][Cu]']	['S=[C]1=NC=CC=N1']	132	2.20876	Non-polar	equal	Converged
MEKHUI_FSR	['12']	[48]	[2]	[2, 2]	[48 48]	vasp	[2.252]	0	0	0	-0.03144	0	0.03535	-0.00331	0.02359	-0.02729	0	-0.00037	0	0	0	-1e-05	0.00196	0	-0.008	0.047869	2	Cd2-H48-C24-N4-O8	0.0119804	0.0486331	['[Cd]']	['NC(C(=O)[O-])CC(C)C']	86	1.76153	Polar	equal	Converged
LAHWOI_FSR	['15']	[83]	[3]	[3, 3]	[83 83]	vasp	[3.777]	-1e-05	-1e-05	0	0.01158	-1e-05	0.01811	-0.02315	0.02369	0.03149	0	0.01415	0	-1e-05	1e-05	-2e-05	0.01516	-2e-05	0.03845	0.0478433	2	Bi2-H54-C48-S4-O12	0.0569875	0.0928188	['[Bi]']	['Cc1cc(C)cc(c1S([O])([O])[O])C']	120	1.895	Polar	equal	Converged
JIVXUH_FSR	['12']	[48]	[2]	[2, 2, 2, 2]	[48 48 48 48]	vasp	[2.498]	1e-05	0	1e-05	0.04755	0	0	1e-05	0	0	0	0.03171	0	0	-1e-05	0	0	0	0.03619	0.04755	222	Cd4-H60-C28-S8-N20	0.0294	0.02633	['[Cd]']	['NCCNCCCN', '[S]C#N']	120	1.76817	Non-polar	equal	Converged
GALSER_FSR	['12']	[30]	[2]	[2, 2, 2, 2]	[30 30 30 30]	vasp	[2.21]	2e-05	-3e-05	2e-05	-0.00296	0	0	0	2e-05	1e-05	0	-0.01173	0	0	-2e-05	0	0	0	0.0474	0.0474	222	Zn4-H52-C32-S8-N8-Cl4-O16	0.04115	0.05288	['Cl[Zn]']	['[O-]C(=O)C1CSCN1']	124	1.95524	Non-polar	equal	Converged
BUSJOR_FSR	['12']	[48]	[2]	[2, 2, 2, 2]	[48 48 48 48]	vasp	[2.13]	0	0	-2e-05	0	-0.01753	0	-1e-05	-1e-05	0	-0.00805	0	0	-0.02551	-0.00289	0.03964	0	0	0	0.0472276	mm2	Cd4-H64-C48-N24	0.03799	0.0575825	['[Cd]']	['CC1=NC=C[N]1', 'CC1=N[CH]C=N1']	140	1.4533	Polar	equal	Converged
UBOBIW01_FSR	['12']	[30]	[2]	[2, 2]	[30 30]	vasp	[2.511]	7e-05	-2e-05	1e-05	0	0.04721	0	2e-05	-4e-05	0	-0.04717	0	0	0.03172	-0.03186	-3e-05	0	0	0	0.0472105	-42m	Zn2-H12-C20-Br8-N4-Cl4	0.0562291	0.0192202			50	2.85368	Non-polar	equal	Converged
OHUVUK_FSR	['12']	[30]	[2]	[2, 2]	[30 30]	vasp	[1.725]	7e-05	-4e-05	-4e-05	0.00457	-2e-05	0.00638	0.02397	0.03685	0.01504	0	-0.00768	0	4e-05	3e-05	5e-05	0.01084	-2e-05	-0.00148	0.0470922	2	Zn2-H12-C12-N8	0.024308	0.0666507	['[Zn]']	['[C]#N']	34	1.63879	Polar	equal	Converged
SIVGIN05_FSR	['12']	[48]	[2]	[2, 2, 2, 2, 2, 2]	[48 48 48 48 48 48]	vasp	[2.184]	-1e-05	-1e-05	0	-0.01082	-1e-05	-0.01542	0.01117	-0.04169	0.01478	0	0.0113	0	1e-05	0	-1e-05	0.01244	1e-05	-0.00215	0.0469996	2	Cd6-H40-C20-Cl12-O10	0.0263936	0.034017			88	2.52162	Polar	equal	Converged
EGAHOK_FSR	['15']	[83]	[3]	[3, 3, 3, 3]	[83 83 83 83]	vasp	[2.625]	3e-05	-3e-05	-5e-05	0.04687	0	0	4e-05	1e-05	0	0	-0.00181	0	0	0	1e-05	0	0	0.0022	0.04687	222	Bi4-H60-C56-O4	0.0212	0.0256701	['[Bi]']	['CC[O]']	124	2.10794	Non-polar	equal	Converged
MEVDID_FSR	['14']	[50]	[4]	[4, 4]	[50 50]	vasp	[3.069]	-0.01625	-0.02599	-0.00494	0	0.01637	0	3e-05	2e-05	1e-05	-0.01025	-1e-05	0.01703	0.02002	0.0069	-0.02299	0	-0.02348	0	0.0465787	m	C44-H56-O6-Sn2	0.0496407	0.0733051	['[Sn]']	['[O-]C(=O)C(c1ccccc1)(c1ccccc1)[O]']	108	1.4982	Polar	equal	Converged
QOSXON_FSR	['2']	[20]	[2]	[2, 2]	[20 20]	vasp	[2.361]	0	0	0	-0.03371	0	0	0	0	0	0	0.03106	0	-6e-05	-3e-05	-2e-05	0	0	-0.04599	0.0459901	222	Ca2-H24-C8-O20	0.07896	0.11002			54	1.70822	Non-polar	equal	Converged
HOYLOY_FSR	['12']	[80]	[2]	[2, 2, 2, 2]	[80 80 80 80]	vasp	[2.098]	-0.00011	-0.0002	6e-05	0.01729	0	0	0	-1e-05	-1e-05	0	0.00485	0	1e-05	0	1e-05	0	0	-0.04584	0.04584	222	Hg4-H36-C48-Br8-N8-Cl4	0.16169	0.1444			108	2.78419	Non-polar	equal	Converged
DUKXEO_FSR	['9']	[27]	[2]	[2, 2, 2, 2]	[27 27 27 27]	vasp	[1.809]	1e-05	3e-05	2e-05	0.04578	0	0	1e-05	0	1e-05	0	-0.04578	0	0	0	0	0	0	0	0.04578	422	Co4-H56-C44-N16	0.0195	0.06528	['[Co]']	['C[C]1N=NC(=C1CC1=C(C)N=N[C]1C)C']	120	1.53903	Non-polar	equal	Converged
EDAXAL_FSR	['12']	[48]	[2]	[2, 2, 2, 2, 2, 2, 2, 2]	[48 48 48 48 48 48 48 48]	vasp	[2.419]	-1e-05	1e-05	0	-0.01468	0	0	0	1e-05	0	0	-0.0457	0	1e-05	0	0	0	0	-0.02806	0.0457	222	Cd8-P4-H64-C28-N4-Cl8-O28	0.04423	0.08993	['[OH2][Cd]Cl']	['[O-]C(=O)C1CCC[NH](C1)CP(=O)([O])[O]']	144	2.45248	Non-polar	equal	Converged
FEBMUV01_FSR	['12']	[30]	[2]	[2, 2, 2, 2]	[30 30 30 30]	vasp	[2.344]	-1e-05	0	0	0.04537	0	0	0	0	0	0	-0.01578	0	0	1e-05	0	0	0	-0.00254	0.04537	222	Zn4-H28-C28-N4-O24	0.0183	0.05987	['[OH2][Zn][OH2]']	['[O-]C(=O)c1ccc(cn1)C(=O)[O-]']	88	2.04865	Non-polar	equal	Converged
CIJNEP_FSR	['12']	[48]	[2]	[2, 2]	[48 48]	vasp	[2.357]	0	0	0	-0.00391	0	-0.00944	0.04285	-0.00515	0.00235	0	-0.01256	0	0	0	0	-0.02439	0	-0.03051	0.0450102	2	Cd2-H42-C32-N14-O10	0.118582	0.150701	['[Cd]']	['[O-]C(=O)CCC(C(=O)[O-])NC(=O)C']	100	1.60157	Polar	equal	Converged
ZEKNUB_FSR	['12']	[30]	[2]	[2, 2, 2, 2]	[30 30 30 30]	vasp	[2.203]	3e-05	4e-05	-3e-05	0	0.04482	0	1e-05	1e-05	1e-05	-0.01461	0	0	-0.00539	-0.01887	0.01273	0	0	0	0.0448201	mm2	C64-H56-N8-O16-Zn4	0.0700538	0.0772417	['[Zn]']	['[O-]C(=O)CCC(=O)[O-]', 'n1ccc(cc1)C=Cc1ccncc1']	148	1.51801	Polar	equal	Converged
TUMGAJ_FSR	['12']	[48]	[2]	[2, 2, 2, 2]	[48 48 48 48]	vasp	[2.301]	-4e-05	2e-05	0	0.04474	0	0	0	0	0	0	0.01169	0	0	0	0	0	0	-0.00449	0.04474	222	Cd4-H44-C24-N4-Cl8-O8	0.07247	0.06416	['Cl[Cd]Cl']	['[O-]C(=O)C1CCC[NH2]C1']	92	2.28722	Non-polar	equal	Converged
VEWMEP_FSR	['2']	[38]	[2]	[2, 2, 2, 2]	[38 38 38 38]	vasp	[2.546]	0	0	0	-0.00309	0	0	0	0	0	0	-0.04457	0	0	0	0	0	0	-0.01373	0.04457	222	Sr4-H44-C16-N4-O28	0.03389	0.05212	['[OH2][Sr]([OH2])[OH2]']	['[O-]C(=O)CC(C(=O)[O-])N']	96	2.15989	Non-polar	equal	Converged
CIJWID_FSR	['12']	[30]	[2]	[2, 2, 2, 2]	[30 30 30 30]	vasp	[2.001]	-1e-05	0	0	0.0242	0	0	0	-1e-05	0	0	0.02673	0	-1e-05	0	1e-05	0	0	0.04456	0.04456	222	Zn4-H48-C40-N16-O16	0.09098	0.04642	['[Zn]']	['[O-]C(=O)CCC(=O)[O-]']	124	1.60248	Non-polar	equal	Converged
IWOWIB_FSR	['12']	[30]	[2]	[2]	[30]	vasp	[2.262]	-0.00042	-3e-05	6e-05	0.01121	0.00029	-0.00344	0.03989	0.01801	0.00745	0	-0.00287	0	-0.0002	-2e-05	-1e-05	0.0322	-0.0001	0.00687	0.0444931	2	C27-H20-N6-O12-Zn1	0.207051	0.23536	['[Zn]']	['C(Cc1ccncc1)Cc1ccncc1']	66	1.73082	Polar	equal	Converged
WATYIB_FSR	['12']	[30]	[2]	[2]	[30]	vasp	[2.594]	-4e-05	-6e-05	-8e-05	-0.00976	0	0.01104	-0.00737	-0.03322	0.01987	0	-0.0205	0	9e-05	7e-05	-5e-05	0.03255	5e-05	-0.01992	0.0444188	2	C44-F6-H30-N6-O12-Si1-Zn1	0.040191	0.0407387	['[Zn]']	['O=C1N(c2ccccc2)C(=O)C(C1OC(=O)c1ccncc1)OC(=O)c1ccncc1']	100	1.19925	Polar	equal	Converged
HOYMIT_FSR	['12']	[80]	[2]	[2, 2, 2, 2]	[80 80 80 80]	vasp	[2.029]	-0.00012	-9e-05	0.00012	-0.04177	0	0	0	0	0	0	0.00654	0	0	0	0	0	0	0.04431	0.04431	222	Hg4-H36-C48-I8-N8-Cl4	0.16779	0.12602			108	3.0196	Non-polar	equal	Converged
GIJPOF_FSR	['14']	[50]	[4]	[4, 4]	[50 50]	vasp	[3.098]	0.0001	-6e-05	1e-05	0.00526	-7e-05	-0.00346	-0.01874	0.02059	0.03389	0	-0.00629	0	5e-05	2e-05	-4e-05	0.02828	2e-05	-0.01213	0.0443085	2	Sn2-H44-C56-O4	0.0952755	0.0794053	['[Sn]']	['[O-]C(=O)c1c2ccccc2cc2c1cccc2']	106	1.52953	Polar	equal	Converged
WAZNUJ_FSR	['12']	[30]	[2]	[2, 2, 2, 2]	[30 30 30 30]	vasp	[2.147]	1e-05	-5e-05	0.00034	-0.02712	0	0	-1e-05	1e-05	-4e-05	0	-0.04387	0	2e-05	-2e-05	4e-05	0	0	-0.03335	0.04387	222	Zn4-H40-C44-S4-N16-O16	0.03086	0.07473	['[Zn]']	['[O]S(=O)(=O)[O]', 'c1ncn(c1)Cc1nc2c([nH]1)cccc2']	124	1.79938	Non-polar	equal	Converged
MUQWOM_FSR	['1']	[3]	[1]	[1, 1, 1, 1]	[3 3 3 3]	vasp	[1.154]	-3e-05	1e-05	0.00012	-0.04382	0	0	0	-4e-05	-6e-05	0	-0.02273	0	0	2e-05	6e-05	0	0	0.00078	0.0438202	222	Li4-H28-C56-O16	0.01325	0.0305703	['[Li]']	['[O]c1ccc(c2c1C(=O)c1ccccc1C2=O)O']	104	1.60884	Non-polar	equal	Converged
NIRPIQ_FSR	['13']	[13]	[3]	[3, 3, 3, 3]	[13 13 13 13]	vasp	[3.512]	2e-05	2e-05	3e-05	-0.04376	0	0	-5e-05	0	-1e-05	0	0.04376	0	3e-05	3e-05	3e-05	0	0	0	0.04376	422	Al4-C32-H16-O20	0.00771	0.05147	['[Al]', '[OH]']	['[O-]C(=O)c1cc(cc(c1)C(=O)[O-])c1cc(cc(c1)C(=O)[O-])C(=O)[O-]']	72	1.04205	Non-polar	equal	Converged
ODEQOD_FSR	['12']	[48]	[2]	[2, 2]	[48 48]	vasp	[2.505]	-0.00068	-0.00153	0.00043	0	0.02065	0	-9e-05	4e-05	0	0.02016	0	0	0.02433	0.02433	0.02685	0	0	0	0.0436581	4mm	C20-Cd2-Cl8-H12-I4-N4	0.02377	0.0404362			50	2.50023	Polar	equal	Converged
KOTDII_FSR	['3']	[39]	[3]	[3, 3, 3, 3]	[39 39 39 39]	vasp	[3.942]	1e-05	0	1e-05	0.04358	0	0	0	0	0	0	0.00056	0	0	0	0	0	0	0.03162	0.04358	222	Y4-H60-C44-O24	0.02573	0.06931	['[Y]']	['[O-]C(=O)C1CCC(C1(C)C)(C)C(=O)[O-]', '[O-]C=O']	132	1.71352	Non-polar	equal	Converged
NEZQAN_FSR	['1']	[3]	[1]	[1, 1, 1, 1, 1, 1]	[3 3 3 3 3 3]	vasp	[1.236]	0.00547	-0.0052	0.00019	0.00917	-0.0178	-0.00055	0.00187	-0.00194	-6e-05	-0.01682	-0.0089	-0.00366	0.00559	0.00559	-0.04258	0	0	0	0.043308	3	Li6-H36-C27-O15	0.118376	0.115275	['[Li]']	['[O-]C(=O)c1ccc(cc1)[O]']	84	1.34218	Polar	equal	Converged
MAXWOA_FSR	['12']	[48]	[2]	[2, 2]	[48 48]	vasp	[2.415]	0	0	-1e-05	-0.00318	0	-0.00553	0.01623	0.02079	0.0275	0	-4e-05	0	0	0	1e-05	0.043	1e-05	-0.00401	0.0432695	2	Cd2-H46-C58-N10-O14	0.0601918	0.081572	['[Cd]']	['CC(C(=O)[O-])NC(=O)c1ccc(cc1)C(=O)[O-]', 'O=C(c1cccc(c1)C(=O)Nc1ccncc1)Nc1ccncc1']	130	1.45378	Polar	equal	Converged
QUBPUY_FSR	['13']	[81]	[1]	[1, 1]	[81 81]	vasp	[1.571]	1e-05	0	3e-05	0.0029	2e-05	-0.04252	0.00039	-0.01221	0.02168	0	-0.0112	0	-4e-05	-3e-05	-4e-05	-0.00524	0	-0.00759	0.0432362	2	Tl2-B2-H26-C42-S12-N6	0.108043	0.100102			90	1.78919	Polar	equal	Converged
DODGUY_FSR	['1']	[3]	[1]	[1, 1, 1, 1]	[3 3 3 3]	vasp	[1.219]	-0.00011	8e-05	0.00024	-0.04319	0	0	1e-05	0	2e-05	0	0.00491	0	1e-05	0	-1e-05	0	0	-0.01972	0.0431909	222	Li4-H32-C36-N4-O16	0.06576	0.04604	['[Li]']	['[O-]C(=O)COc1ccccc1C(=O)N']	92	1.55991	Non-polar	equal	Converged
QEFZOQ_FSR	['13']	[13]	[3]	[3, 3]	[13 13]	vasp	[2.059]	0.01687	0.03819	0.00017	0	0.00644	0	0	-2e-05	-2e-05	-0.00529	-1e-05	0.02369	-0.01659	-0.00128	-0.0215	0	0.00579	0	0.0431782	m	Al2-H22-C16-S2	0.0583096	0.0610561	['[Al]']	['[S]c1ccccc1']	42	1.28384	Polar	equal	Converged
WENSIS_FSR	['2', '1', '4']	[20, 19, 40]	[2, 1, 4]	[2, 1, 1, 4]	[20 19 19 40]	vasp	[2.696, 1.201, 4.759]	5e-05	-0.00025	8e-05	0.02826	0.01259	1e-05	-4e-05	-5e-05	-0.00024	-0.01267	0.02821	-6e-05	0.03013	-0.03033	-1e-05	0	0	0.00595	0.043165	-4	C8-Ca1-H16-K2-O24-Zr1	0.0157138	0.03462	['[Ca]', '[OH2][K]([OH2])([OH2])[OH2]', '[Zr]']	['[O-]C(=O)C(=O)[O-]']	52	2.04404	Non-polar	equal	Converged
MASZEL_FSR	['12']	[48]	[2]	[2, 2, 2, 2]	[48 48 48 48]	vasp	[2.43]	0.00014	8e-05	0.00012	0.01584	0	0	0	0	0	0	0.00802	0	-1e-05	-2e-05	-2e-05	0	0	-0.04301	0.04301	222	Cd4-H48-C48-S4-N8-O24	0.04939	0.0618103	['[OH2][Cd][OH2]']	['[O]S(=O)(=O)[O]']	136	1.99217	Non-polar	equal	Converged
IGEHOS_FSR	['12']	[48]	[2]	[2, 2]	[48 48]	vasp	[1.797]	1e-05	1e-05	1e-05	0.02775	0	0.00239	0.02316	-0.02229	-0.02713	0	0.00888	0	0	0	0	-0.00049	-1e-05	0.0213	0.0429898	2	Cd2-P4-H64-C62-Cl4-O4	0.0273909	0.0290644	['Cl[Cd]Cl']	['CC1(C)OC(C(O1)CP(c1ccccc1)c1ccccc1)CP(c1ccccc1)c1ccccc1']	140	1.5378	Polar	equal	Converged
TAKTEH_FSR	['13']	[31]	[3]	[3, 3, 3, 3]	[31 31 31 31]	vasp	[3.632]	-0.00029	0.00031	-1e-05	0.04297	0	0	-2e-05	-2e-05	-4e-05	0	-0.04279	0	1e-05	1e-05	5e-05	0	0	0	0.0429721	422	C32-Ga4-H16-O20	0.00939	0.0523617	['[Ga]', '[OH]']	['[O-]C(=O)c1cc(cc(c1)C(=O)[O-])c1cc(cc(c1)C(=O)[O-])C(=O)[O-]']	72	1.2085	Non-polar	equal	Converged
MUXNUO02_FSR	['1']	[11]	[1]	[1, 1, 1, 1]	[11 11 11 11]	vasp	[1.197]	8e-05	2e-05	7e-05	-0.00154	-1e-05	0.01219	-0.01516	-0.00102	-0.00274	0	-0.03998	0	2e-05	5e-05	2e-05	0.02639	-6e-05	-0.01555	0.0428577	2	Na4-H32-C12-S12-N12-O12	0.042974	0.0567664			84	1.7654	Polar	equal	Converged
OYEJAE_FSR	['12']	[48]	[2]	[2, 2, 2, 2]	[48 48 48 48]	vasp	[2.223]	0	0	0	0.01589	0	0	0	0	0	0	-0.02506	0	0	0	0	0	0	0.04275	0.04275	222	Cd4-H40-C24-S8-N16	0.14996	0.19271	['[Cd]']	['S=C1NCC[N]1']	92	2.13054	Non-polar	equal	Converged
ODIVON01_FSR	['12']	[30]	[2]	[2, 2]	[30 30]	vasp	[2.243]	0	0	-1e-05	0.04258	0	0	-1e-05	-1e-05	0	0	0.00635	0	-0.00021	-0.00017	2e-05	0	0	0.01706	0.04258	222	Zn2-H32-C40-N12-O8	0.10247	0.13597	['[Zn]']	['[O-]C(=O)c1ccc(cc1)CN1[N]C=N[CH]1']	94	1.64287	Non-polar	equal	Converged
XAHGAQ_FSR	['12']	[48]	[2]	[2, 2]	[48 48]	vasp	[2.818]	-3e-05	0.00015	3e-05	0	0.03077	0	0	-7e-05	-2e-05	-0.01186	0	0	-0.00669	0.02568	0.03329	0	0	0	0.0425732	mm2	C24-Cd2-H16-N20-S4	0.0781357	0.0963358	['[Cd]']	['c1ccn2c(n1)ncn2']	66	1.8341	Polar	equal	Converged
CUXVEX_FSR	['11']	[29]	[1]	[1, 1, 1, 1, 1, 1, 1, 1, 1, 1, 1, 1]	[29 29 29 29 29 29 29 29 29 29 29 29]	vasp	[0.827]	0.00014	-1e-05	0.00035	-0.04252	0	0	5e-05	0	9e-05	0	-0.03023	0	-4e-05	-5e-05	3e-05	0	0	-0.00129	0.0425217	222	Cu12-H40-C48-I12-N16	0.00724	0.0421117	['[Cu]1[Cu][Cu][Cu][Cu][Cu]1', '[I]']	['c1ccc(cn1)Cn1nnc2c1cccc2']	128	3.17442	Non-polar	equal	Converged
LIBHUB_FSR	['2']	[38]	[2]	[2, 2, 2, 2]	[38 38 38 38]	vasp	[2.637]	0	0	0	0	-0.01546	0	0	2e-05	0	-0.00918	0	0	-0.04131	-0.00922	0.00167	0	0	0	0.0423593	mm2	Sr4-H56-C48-O20	0.0246797	0.0383515	['O', '[Sr]']	['[O-]C(=O)CCc1ccc(cc1)CCC(=O)[O-]']	128	1.76064	Polar	equal	Converged
QAWSUD_FSR	['12']	[48]	[2]	[2, 2, 2, 2]	[48 48 48 48]	vasp	[2.351]	0	-1e-05	0	0.00747	0	-0.00488	-0.02293	-0.01559	0.03177	0	-0.00319	0	-1e-05	0	1e-05	0.00452	0	-0.00366	0.0422888	2	Cd4-H40-C40-N20-Cl12-O4	0.0166913	0.0458815			120	1.98012	Polar	equal	Converged
FELXAV_FSR	['6']	[42]	[6]	[6, 6, 6, 6]	[42 42 42 42]	vasp	[4.786]	3e-05	3e-05	5e-05	0.02521	-2e-05	-0.01977	-0.02032	0.03372	0.00649	0	-0.01385	0	0.00021	0.0001	0.00022	-0.01672	-9e-05	-0.00328	0.0422361	2	Mo4-H60-C60-N4-O16	0.0498848	0.0404259	['[Mo]', '[O]']		144	1.41169	Polar	equal	Converged
OWIHUZ_FSR	['13']	[49]	[3]	[3, 3, 3, 3]	[49 49 49 49]	vasp	[3.556]	-1e-05	-1e-05	-0.0001	-0.04206	0	0	2e-05	-2e-05	-6e-05	0	0.04201	0	5e-05	5e-05	0.00026	0	0	0	0.0420601	422	C32-H24-In4-O20	0.00518	0.0472401	['[In]', '[OH]']	['[O-]C(=O)c1cc(cc(c1)C(=O)[O-])c1cc(cc(c1)C(=O)[O-])C(=O)[O-]']	80	1.30215	Non-polar	equal	Converged
SOMMOY_FSR	['12']	[48]	[2]	[2, 2]	[48 48]	vasp	[2.598]	1e-05	0	1e-05	-0.00829	0	0.02854	-0.03422	-0.01431	0.01355	0	0.01409	0	0	0	1e-05	0.03806	-1e-05	0.01014	0.0419275	2	Cd2-H28-C36-S2-N4-O18	0.0927716	0.113219	['[OH2][Cd][OH2]']	['[O-]C(=O)c1cc(ccc1O)S([O])([O])[O]']	90	2.02619	Polar	equal	Converged
UQEFUS_FSR	['14']	[50]	[2]	[2, 2, 2, 2]	[50 50 50 50]	vasp	[2.884]	-7e-05	-5e-05	-0.0001	-0.02597	7e-05	-0.00061	0.01363	-0.01397	0.02533	0	0.0271	0	-4e-05	-0.00019	-0.00011	-0.01753	-0.00016	-0.00893	0.0419164	2	Sn4-H24-C28-N4-O22	0.0408071	0.0593767			82	2.33653	Polar	equal	Converged
IJAZIC_FSR	['1']	[3]	[1]	[1, 1, 1, 1]	[3 3 3 3]	vasp	[0.817]	0	0	0	0.04178	0	0	0	0	0	0	0.02601	0	0	0	0	0	0	-0.0038	0.04178	222	Li4-H64-C40-N4	0.01648	0.0253			112	1.09185	Non-polar	equal	Converged
PIBLAQ_FSR	['12']	[30]	[2]	[2, 2, 2, 2]	[30 30 30 30]	vasp	[2.176]	2e-05	0.00014	-5e-05	-0.00153	0	0	1e-05	0	-1e-05	0	-0.0416	0	0	3e-05	-5e-05	0	0	-0.01443	0.0416	222	Zn4-H60-C40-N8-Cl4-O16	0.01493	0.05028	['[OH2][Zn]Cl']	['CC(C(C(=O)[O-])NCc1ccncc1)O']	132	1.73266	Non-polar	equal	Converged
NIHFOA_FSR	['13']	[81]	[3]	[3, 3, 3, 3]	[81 81 81 81]	vasp	[2.213]	-4e-05	-1e-05	0	0.04149	0	0	0	0	0	0	0.00185	0	2e-05	1e-05	-1e-05	0	0	-0.01981	0.04149	222	Tl4-H56-C40-S4-N4-O8	0.05548	0.07734			116	2.24924	Non-polar	equal	Converged
QAYBOK_FSR	['7']	[25]	[2]	[2, 2]	[25 25]	vasp	[2.265]	-0.02577	0.00366	-0.0266	0.0002	0.00286	-3e-05	-0.00058	-0.00174	-0.00128	-0.00815	-0.00015	-0.01187	-0.01848	0.01949	0.00329	-0.00198	0.00856	0.00012	0.0408319	m	C64-H44-Mn2-N8-O12-S2	0.0747476	0.0961645	['[Mn]']	['[O-]C(=O)c1ccc(cc1)S(=O)(=O)c1ccc(cc1)C(=O)[O-]', 'c1ncn(c1)c1ccc(cc1)c1ccc(cc1)n1cncc1']	132	1.49653	Polar	equal	Converged
XEQLEM_FSR	['2']	[12]	[2]	[2, 2, 2, 2]	[12 12 12 12]	vasp	[2.611]	0	-1e-05	0	0.00351	0	-0.00609	-0.02852	-0.02728	-0.01011	0	-0.00123	0	2e-05	2e-05	2e-05	-0.00193	0	0.00616	0.0407592	2	Mg4-H32-C48-N8-O16	0.00386284	0.0408388	['[Mg]']	['[O-]C(=O)c1ccncc1']	108	1.32589	Polar	equal	Converged
UNUQAX_FSR	['1']	[3]	[1]	[1, 1]	[3 3]	vasp	[0.823]	-0.02107	-0.01651	-0.01344	0	0.00015	0	-3e-05	3e-05	-2e-05	0.00278	3e-05	0.00348	-0.02081	0.00992	-0.02017	0	-0.0178	0	0.0405954	m	C38-H48-Li2-O2-P2	0.179083	0.190646			92	1.16684	Polar	equal	Converged
FOWZIC_FSR	['11']	[29]	[1]	[1, 1, 1, 1]	[29 29 29 29]	vasp	[0.633]	0.0098	-0.01134	-0.03652	0	0.00448	0	-2e-05	6e-05	0	-0.00892	-2e-05	0.0076	-0.00297	0.00481	0.00784	0	0.01393	0	0.0405949	m	Cu4-H48-C52-S8-Br4	0.0314388	0.0337867	['[Cu][Cu](Br)Br']	['C(Sc1ccccc1)Sc1ccccc1']	116	1.848	Polar	equal	Converged
KIKBIR_FSR	['12']	[48]	[2]	[2, 2, 2, 2]	[48 48 48 48]	vasp	[2.572]	0	0	0	0.02372	0	0	0	0	0	0	0.04049	0	-1e-05	0	0	0	0	0.0216	0.04049	222	Cd4-H32-C48-S8-N40-O8	0.0885	0.0669	['[Cd]']	['O=C(c1cccs1)NC1=NN=N[N]1']	140	2.00379	Non-polar	equal	Converged
FISPOP_FSR	['11']	[29]	[1]	[1, 1]	[29 29]	vasp	[0.413]	-4e-05	0	0.00014	-0.0191	9e-05	0.02111	-0.02596	0.02072	0.01673	0	-0.01516	0	0.00023	0.00013	0.00033	-0.01155	4e-05	0.00183	0.0401618	2	Cu2-H16-C26-S2-N6-O2	0.0466297	0.0503627	['[Cu]']	['[S]C#N']	54	1.81428	Polar	equal	Converged
GANVIC_FSR	['14']	[50]	[4]	[4, 4, 4, 4]	[50 50 50 50]	vasp	[2.939]	0	1e-05	-1e-05	0	-8e-05	0	0	-1e-05	-2e-05	0.01518	0	0	-0.00385	-0.03943	-0.00551	0	0	0	0.0399988	mm2	Sn4-H52-C36-N12	0.0611706	0.0916099			104	1.6352	Polar	equal	Converged
OGAPIY_FSR	['12']	[48]	[2]	[2, 2]	[48 48]	vasp	[2.756]	0.00049	0.0012	0.00028	0.0336	0.00099	-0.0011	0.0025	-0.0056	0.0189	0	-0.01726	0	0	0.00022	-1e-05	0.01864	-0.00012	-0.01771	0.0398107	2	Cd2-H28-C44-N24-O8	0.0273813	0.0490343	['[Cd]']	['[O-]C(=O)c1cc(cc(c1)N1[CH]N=C[N]1)N1[CH]N=C[N]1', '[O-]C(=O)c1cc(cc(c1)n1ncnc1)N1[N]C=N[CH]1']	106	1.86931	Polar	equal	Converged
EJIHEM_FSR	['12']	[48]	[2]	[2, 2, 2, 2]	[48 48 48 48]	vasp	[2.565]	0	0	0	-0.00234	0	0	-1e-05	-2e-05	-1e-05	0	-0.02021	0	-1e-05	-1e-05	0	0	0	-0.0398	0.0398	222	Cd4-H48-C56-S8-N16-O8	0.02412	0.06392	['[Cd]']	['[S]C#N']	140	1.84229	Non-polar	equal	Converged
YEHBAQ_FSR	['11']	[29]	[2]	[2]	[29]	vasp	[1.734]	0.00966	0.01067	0.01101	0.00046	-0.00321	0.00035	-0.01592	-0.01679	-0.01647	0.00122	-0.00093	-0.00083	-0.01131	-0.01406	-0.01097	-0.00207	-0.00018	-0.00231	0.0397716	1	Cu1-H20-C14-N14-O6	0.0010258	0.0406678	['[Cu]']	['C1=N[CH]N([N]1)CCCn1cncn1']	55	1.73395	Polar	equal	Converged
MIQTOX_FSR	['12']	[30]	[2]	[2, 2, 2, 2]	[30 30 30 30]	vasp	[2.193]	1e-05	0.00013	-1e-05	-0.00622	0	0	0	0	-1e-05	0	0.03613	0	-2e-05	-1e-05	-2e-05	0	0	-0.0394	0.0394	222	Zn4-H56-C56-N24-O8	0.03704	0.07644			148	1.54617	Non-polar	equal	Converged
KEKLIY_FSR	['12']	[30]	[2]	[2, 2, 2, 2]	[30 30 30 30]	vasp	[2.133]	-4e-05	0.00011	2e-05	0.00405	0	0	1e-05	-1e-05	-1e-05	0	0.00063	0	0	0	0	0	0	-0.03897	0.03897	222	Zn4-P4-H24-C12-N4-O24	0.05215	0.0562001	['[Zn]']	['[O-]C(=O)C(COP(=O)([O])[O])[NH3]']	72	2.35147	Non-polar	equal	Converged
IWAXUA_FSR	['12']	[48]	[2]	[2]	[48]	vasp	[2.65]	-0.01941	0.02762	-0.01141	-0.00971	0.00421	-0.00879	-0.01525	-0.00395	0.00477	0.00369	-0.00905	-0.00323	0.01217	-0.00446	-0.00935	-0.00028	-0.00904	-0.00641	0.0389469	1	Cd1-H36-C36-Br2-N4-O5	0.0920629	0.103698	['[OH2][Cd]']	['Cc1cc2n(CCCCn3cnc4c3cc(C)c(c4)C)cnc2cc1C']	84	1.66335	Polar	equal	Converged
CATART03_FSR	['2']	[20]	[2]	[2, 2, 2, 2]	[20 20 20 20]	vasp	[2.391]	8e-05	0.00011	-7e-05	0.02214	0	0	7e-05	-0.00016	-0.00016	0	0.01814	0	0	-4e-05	0.00014	0	0	0.03891	0.0389103	222	Ca4-H32-C16-O32	0.04166	0.00275387			84	1.70447	Non-polar	equal	Converged
OWUVUY_FSR	['1']	[11]	[1]	[1, 1, 1, 1]	[11 11 11 11]	vasp	[1.225]	0	8e-05	0.00019	0.03879	0	0	-1e-05	0	-7e-05	0	0.01581	0	0	1e-05	2e-05	0	0	0.00755	0.0387905	222	Br4-C20-H40-Na4-O24	0.01306	0.0257308			92	1.98483	Non-polar	equal	Converged
WUBWAT_FSR	['12']	[48]	[2]	[2, 2, 2, 2]	[48 48 48 48]	vasp	[2.273]	-1e-05	-6e-05	3e-05	0.02934	0	0	0	0	0	0	-0.03878	0	0	0	0	0	0	0.00917	0.03878	222	Cd4-H36-C20-Br8-N4-O8	0.01017	0.04895	['Br[Cd]Br']	['[O-]C(=O)C1CCC[NH2]1']	80	2.65613	Non-polar	equal	Converged
TAKTIL_FSR	['13']	[31]	[3]	[3, 3, 3, 3]	[31 31 31 31]	vasp	[3.723]	-0.00063	0.00023	0.0001	0.03843	0	0	0.00011	0.0003	-0.00019	0	-0.03874	0	1e-05	1e-05	-6e-05	0	0	0	0.0387418	422	C44-Ga4-H16-O44	0.00843	0.0471715	['[Ga]', '[OH]']	['[O-]C(=O)c1cc(cc(c1)C(=O)[O-])c1cc(cc(c1)C(=O)[O-])C(=O)[O-]']	108	1.84275	Non-polar	equal	Converged
ADOJEJ_FSR	['12']	[80]	[2]	[2, 2]	[80 80]	vasp	[2.616]	2e-05	-1e-05	0	0	0.01812	0	0	4e-05	0	-0.0182	0	0	0.02732	-0.02738	-2e-05	0	0	0	0.0386788	-42m	Hg2-H12-C20-N4-Cl12	0.0508551	0.0121765			50	2.46945	Non-polar	equal	Converged
FOCLOB_FSR	['12']	[30]	[2]	[2, 2]	[30 30]	vasp	[2.25]	0	0	0	-0.03853	0	0	-1e-05	1e-05	-1e-05	0	-0.03055	0	0	7e-05	1e-05	0	0	-0.01925	0.03853	222	C72-H52-N8-O16-Zn2	0.03924	0.00759033	['[Zn]']	['[O-]C(=O)c1ccc(cc1)C(n1cncc1)c1ccc(cc1)C(=O)O']	150	1.38733	Non-polar	equal	Converged
OVUNOJ_FSR	['1']	[3]	[1]	[1, 1, 1, 1]	[3 3 3 3]	vasp	[1.084]	0	0	0	0.01716	0	0	0	0	0	0	-0.0033	0	0	0	0	0	0	0.0385	0.0385	222	Li4-H60-C48-N24	0.00836	0.04686			136	1.32278	Non-polar	equal	Converged
FUQDUS_FSR	['12']	[30]	[2]	[2, 2, 2, 2]	[30 30 30 30]	vasp	[1.88]	1e-05	0	0	0.01803	0	0	-1e-05	0	0	0	0.03845	0	-1e-05	0	-1e-05	0	0	0.01718	0.03845	222	Zn4-H48-C40-S4-N8-Cl8	0.0497	0.06688	['Cl[Zn]Cl']	['S=C1CCC(N1C)c1cccnc1']	112	1.72627	Non-polar	equal	Converged
DIDNOV_FSR	['11']	[29]	[1]	[1, 1]	[29 29]	vasp	[0.055]	0.01869	0.01649	0.01863	0.00055	0.00611	-0.00388	0.00287	-0.00125	-0.00244	-0.00415	-0.00336	0.00909	-0.00688	-0.01286	-0.01683	-0.00693	0.00384	-0.00048	0.0383276	1	Cu2-H18-C22-N4	0.0419595	0.0283593	['[Cu]']	['[C]#N']	46	1.70368	Polar	equal	Converged
OCOKIC_FSR	['1']	[19]	[1]	[1, 1, 1, 1]	[19 19 19 19]	vasp	[1.188]	3e-05	3e-05	-1e-05	-0.01611	0	0	0	0	0	0	-0.03824	0	0	0	1e-05	0	0	-0.03128	0.03824	222	K4-Si4-B4-H76-C28-N4	0.04301	0.01177			120	1.22222	Non-polar	equal	Converged
OTEGOL01_FSR	['13']	[49]	[3]	[3, 3, 3, 3]	[49 49 49 49]	vasp	[3.546]	3e-05	5e-05	-6e-05	-0.03813	0	0	-8e-05	-9e-05	-0.0002	0	0.03807	0	0	0	0.0002	0	0	0	0.0381301	422	C32-H16-In4-O20	0.00449	0.0426201	['[In]', '[OH]']	['[O-]C(=O)c1cc(cc(c1)C(=O)[O-])c1cc(cc(c1)C(=O)[O-])C(=O)[O-]']	72	1.28778	Non-polar	equal	Converged
PACVOF_FSR	['12']	[30]	[2]	[2, 2, 2, 2]	[30 30 30 30]	vasp	[2.451]	-0.02295	-0.01659	-0.02252	0	0.00363	0	-5e-05	-6e-05	-5e-05	0.00587	3e-05	-0.00056	-0.0186	-0.00599	0.00705	0	-0.0041	0	0.0380366	m	C68-Cl4-H52-N4-O16-Zn4	0.0310952	0.0494259	['[Zn][Zn]']	['[O-]C(=O)c1cccc(c1)C(=O)[O-]']	148	1.61553	Polar	equal	Converged
OQETEK_FSR	['fblock']	[70]	[3]	[3, 3, 3, 3]	[70 70 70 70]	vasp	[4.137]	5e-05	-5e-05	0	0.00271	-0.00067	0	-9e-05	6e-05	0	-0.0007	-0.00272	-1e-05	-0.01567	-0.01567	-0.03036	0	0	0	0.0375876	4	Yb4-H36-C60-O28	0.0104181	0.0328808	['[OH2][Yb]']	['[O-]C(=O)c1ccc(cc1)c1cc(cc(c1)C(=O)[O-])C(=O)[O-]']	128	1.00172	Polar	equal	Converged
FEJGEH_FSR	['14']	[50]	[4]	[4]	[50]	vasp	[3.407]	-0.00613	-0.03476	-0.00174	0.00299	-0.00514	0.00559	0.0004	-0.00728	-0.008	0.00081	0.00217	0.00201	-0.01175	0.00795	-0.00147	0.0008	-0.00108	0.00119	0.0374695	1	Sn1-H26-C18-N2-Cl2	0.0218234	0.0384691	['[Sn]']	['n1ccc(cc1)c1ccncc1']	49	1.10586	Polar	equal	Converged
JUYVOO_FSR	['15']	[83]	[3]	[3, 3, 3, 3, 3, 3]	[83 83 83 83 83 83]	vasp	[4.253]	-0.01369	0.01359	-5e-05	0.03209	0	0	0.00011	-8e-05	0.00023	0.00019	-0.03145	0.01304	-1e-05	-1e-05	-2e-05	0	0	0	0.0374423	32	Bi6-H18-C24-O30	0.07281	0.0412959	['[Bi]']	['[O-]C(=O)CC(C(=O)[O-])[O]']	78	3.75548	Non-polar	equal	Converged
KACHUT_FSR	['10']	[78]	[2]	[2, 2, 2, 2]	[78 78 78 78]	vasp	[0.257]	0.00175	0.00165	0.00022	0	0.00642	0	0	0	0	0.00639	0	0	-0.00263	-0.00263	-0.03724	0	0	0	0.0374282	4mm	C48-H40-Pt4-S8	0.036894	0.0171126	['[Pt]']	['[S]c1ccccc1']	100	2.21815	Polar	equal	Converged
LIDZAB_FSR	['12']	[48]	[2]	[2, 2]	[48 48]	vasp	[2.495]	0	0	1e-05	-0.01559	1e-05	0.01974	-0.02965	-0.01791	0.00778	0	0.00034	0	1e-05	0	0	0.01296	0	-0.02442	0.0372258	2	Cd2-H40-C36-N16-O8	0.0543202	0.0816536	['[Cd]']	['[O-]C(=O)c1nccnc1C(=O)[O-]']	102	1.64685	Polar	equal	Converged
MISKAD_FSR	['1']	[3]	[1]	[1, 1, 1, 1]	[3 3 3 3]	vasp	[1.15]	-1e-05	2e-05	-4e-05	-0.02951	0	0	0	0	0	0	-0.00678	0	0	0	0	0	0	-0.03722	0.03722	222	Li4-H36-C20-I4-N4-O8	0.05333	0.08284	['[Li]']	['[O-]C(=O)C1CCC[NH2]1']	76	2.06328	Non-polar	equal	Converged
PIRMOU_FSR	['1']	[37]	[1]	[1, 1, 1, 1]	[37 37 37 37]	vasp	[1.491]	-0.00125	-0.00029	0.0029	-0.03681	0	0	-2e-05	0.00018	0.0001	0	0.00241	0	-4e-05	0.00042	0.00018	0	0	0.0008	0.0369464	222	Rb4-H16-C32-N8-Cl8-O16	0.00291	0.0393181	['O', '[Rb]']	['N#CC1=C(C#N)C(=O)C(=C(C1=O)Cl)Cl']	84	2.0685	Non-polar	equal	Converged
XELHUT_FSR	['12']	[48]	[2]	[2, 2, 2, 2]	[48 48 48 48]	vasp	[2.139]	0.00018	0.00011	0.00036	-0.03259	0	0	0	-1e-05	0	0	-0.03681	0	0	0	0	0	0	-0.00964	0.03681	222	Cd4-H28-C32-I8-N20	0.07818	0.110771	['I[Cd]I']	['n1ccc(cc1)C=Nn1cnnc1']	92	2.60777	Non-polar	equal	Converged
REFGUG_FSR	['12']	[30]	[2]	[2, 2, 2, 2]	[30 30 30 30]	vasp	[2.166]	1e-05	1e-05	1e-05	-0.0197	0	0	0	0	0	0	-0.03621	0	0	0	1e-05	0	0	-0.01573	0.03621	222	Zn4-H40-C44-N24-O8	0.01869	0.02245	['[Zn]']	['CCC1=NN=N[N]1', '[O-]C(=O)c1ccc2c(c1)nc[nH]2']	120	1.67698	Non-polar	equal	Converged
YARYOF_FSR	['12']	[48]	[2]	[2, 2, 2, 2]	[48 48 48 48]	vasp	[1.749]	0.00587	0.01523	-0.01719	0	0.00663	0	2e-05	2e-05	2e-05	0.00136	1e-05	-0.01487	0.00318	0.00907	0.025	0	-0.01914	0	0.036202	m	C36-Cd4-H44-N16	0.0420656	0.066738	['[Cd]']	['NCCN', '[C]#N']	100	1.83138	Polar	equal	Converged
AKAYER_FSR	['11']	[29]	[1]	[1, 1, 1, 1]	[29 29 29 29]	vasp	[0.263]	0.00022	0.00013	-0.00074	-0.00125	-0.00023	0.00076	0.02043	0.02427	-0.01443	0	0.00966	0	0.00015	9e-05	0.00027	0.00695	3e-05	0.00174	0.0361685	2	C48-Cu4-H30-I4-N6-O12	0.0337289	0.0353025	['[Cu][Cu](I)I']	['O=C(c1ccncc1)Oc1cc(OC(=O)c2ccncc2)cc(c1)OC(=O)c1ccncc1']	104	1.33603	Polar	equal	Converged
VAHWOS01_FSR	['12']	[30]	[2]	[2, 2, 2, 2]	[30 30 30 30]	vasp	[2.236]	0	0	0	-0.01225	0	0	0	0	0	0	-0.03584	0	0	0	1e-05	0	0	-0.00071	0.03584	222	Zn4-H16-C32-N32	0.00544	0.0345	['[Zn]']	['N1=NN=C([N]1)c1ccc(cc1)C1=NN=N[N]1']	84	1.99496	Non-polar	equal	Converged
LEBHUY_FSR	['12']	[30]	[2]	[2, 2, 2, 2]	[30 30 30 30]	vasp	[2.022]	-2e-05	0	-2e-05	-0.01753	0	0	0	0	1e-05	0	0.03576	0	2e-05	0	1e-05	0	0	0.00184	0.03576	222	Zn4-H64-C40-N8-O20	0.03104	0.0605			136	1.68778	Non-polar	equal	Converged
OXAZUK_FSR	['12']	[48]	[2]	[2, 2, 2, 2]	[48 48 48 48]	vasp	[2.439]	-2e-05	6e-05	0	0.01194	0	0	0	6e-05	-1e-05	0	-0.0164	0	-2e-05	-3e-05	-4e-05	0	0	-0.03566	0.03566	222	Cd4-H20-C24-S4-N12-Cl8	0.07704	0.06064			72	2.39538	Non-polar	equal	Converged
NEQNAZ02_FSR	['12']	[48]	[2]	[2, 2, 2, 2]	[48 48 48 48]	vasp	[2.427]	-0.0002	-0.00016	-6e-05	0.03564	0	0	0	1e-05	0	0	-0.01583	0	0	0	-1e-05	0	0	-0.02567	0.035641	222	Cd4-H32-C24-N8-O28	0.0464	0.0820404	['[OH2][Cd][OH2]']	['[O-]C(=O)c1nccnc1C(=O)[O-]']	96	2.34327	Non-polar	equal	Converged
PEKCOX01_FSR	['1']	[3]	[1]	[1, 1, 1, 1]	[3 3 3 3]	vasp	[1.126]	-0.0002	0.00017	3e-05	0.01841	0	0	0	0	0	0	0.01466	0	0	0	0	0	0	-0.03563	0.03563	222	Li4-H32-C20-N4-O16	0.05204	0.08767	['[Li][OH2]']	['O=C1CCC(N1)C(=O)[O-]']	76	1.56113	Non-polar	equal	Converged
PIFDOY_FSR	['11']	[29]	[2]	[2, 2, 2, 2]	[29 29 29 29]	vasp	[1.322]	7e-05	-3e-05	-7e-05	-0.03538	0	0	1e-05	2e-05	-1e-05	0	-0.01649	0	-3e-05	3e-05	-2e-05	0	0	-0.00435	0.0353802	222	Cu4-H56-C24-N8-Cl8	0.01807	0.0288302			100	1.77603	Non-polar	equal	Converged
KOTDOO_FSR	['fblock']	[70]	[3]	[3, 3, 3, 3]	[70 70 70 70]	vasp	[3.914]	-1e-05	0	0	0.03511	0	0	0	0	0	0	-0.00056	0	0	0	0	0	0	0.02853	0.03511	222	Yb4-H60-C44-O24	0.02711	0.06222	['[Yb]']	['[O-]C(=O)C1CCC(C1(C)C)(C)C(=O)[O-]', '[O-]C=O']	132	2.18884	Non-polar	equal	Converged
MIHHOB_FSR	['12']	[30]	[2]	[2, 2, 2, 2]	[30 30 30 30]	vasp	[2.144]	1e-05	-1e-05	0	-0.01703	0	0	1e-05	-2e-05	1e-05	0	-0.03505	0	-2e-05	-2e-05	-2e-05	0	0	0.02925	0.03505	222	Zn4-H32-C48-N24	0.05404	0.07443	['[Zn]']	['C1=CN=C2C(=NC=N2)[CH]1', 'C1=[N]=c2c(=N1)cccn2', '[CH]1C=NC2=NC=NC2=C1']	108	1.65661	Non-polar	equal	Converged
GUQNAI_FSR	['12']	[30]	[2]	[2, 2, 2, 2]	[30 30 30 30]	vasp	[2.052]	4e-05	-6e-05	-4e-05	-0.03472	0	0	8e-05	-3e-05	0.0002	0	0.00564	0	0.00015	-0.00017	0.00011	0	0	0.03498	0.0349809	222	Zn4-H16-C16-S16-N24	0.15185	0.14621	['[Zn]']	['S=C1[N]N=C(S1)N']	76	2.16422	Non-polar	equal	Converged
KIZXIA_FSR	['11']	[29]	[1]	[1, 1, 1, 1]	[29 29 29 29]	vasp	[0.78]	-0.00011	-0.00014	-0.0003	0.00106	0	0	-1e-05	0	0	0	-0.03486	0	0	0	0	0	0	-0.01744	0.03486	222	Cu4-H28-C36-N4-Cl4	0.02422	0.05424			76	1.90298	Non-polar	equal	Converged
WUXMOR02_FSR	['7']	[25]	[3]	[3]	[25]	vasp	[3.381]	-0.00035	-0.00158	0.00103	0.02089	0	0	8e-05	0.00111	0.00118	0	0.0079	0	0	3e-05	0	0	0	0.0347	0.0347	222	C10-F3-H8-Mn1-N2	0.01783	0.04674	['F[Mn](F)F']	['n1ccc(cc1)c1ccncc1']	24	1.86291	Non-polar	equal	Converged
CAGKON_FSR	['1']	[11]	[1]	[1, 1]	[11 11]	vasp	[1.206]	1e-05	0	0	0.0073	-1e-05	-0.00391	-0.00249	-0.00777	-0.013	0	-0.0043	0	0	2e-05	-5e-05	-0.02658	1e-05	0.0204	0.0344896	2	Na2-P4-H76-C46-N2-O12	0.0282817	0.0506914	['[Na]']	['O=C1[P]C(=O)P1C(=Nc1c(C)cccc1C)C(C)(C)C']	142	1.21713	Polar	equal	Converged
FINQEA_FSR	['12']	[30]	[2]	[2, 2, 2, 2]	[30 30 30 30]	vasp	[2.008]	1e-05	0	0	0.03442	0	0	1e-05	0	-1e-05	0	-0.02883	0	2e-05	1e-05	1e-05	0	0	-0.0128	0.03442	222	Zn4-H64-C40-N8-Cl8-O16	0.0208	0.05522	['Cl[Zn]Cl']	['[O-]C(=O)C[N]12CC[N](CC1)(CC2)CC(=O)[O-]']	140	1.86775	Non-polar	equal	Converged
RIKREL_FSR	['fblock']	[58]	[4]	[4]	[58]	vasp	[5.143]	-0.00013	1e-05	1e-05	-0.00605	-3e-05	0.01768	0.00806	-0.00236	-0.03093	0	0.01187	0	-7e-05	5e-05	-8e-05	-0.00252	-6e-05	-0.00709	0.0341775	2	C12-Ce1-H10-O6-P2	0.0331893	0.0353374	['[Ce]']	['[O]P(=O)(c1ccccc1)[O]']	31	1.88472	Polar	equal	Converged
YAVMIT_FSR	['12']	[30]	[2]	[2, 2, 2, 2]	[30 30 30 30]	vasp	[2.135]	-1e-05	-1e-05	-1e-05	0.01967	0	0	0	1e-05	-1e-05	0	-0.03415	0	0	-1e-05	-1e-05	0	0	-0.02061	0.03415	222	Zn4-H24-C40-N32	0.05069	0.06677	['[Zn]']	['C1=[N]=c2c(=N1)cncn2', 'N1=C[C]2C(=NC=N2)N=C1']	100	1.72754	Non-polar	equal	Converged
SAXXAQ_FSR	['11']	[29]	[1]	[1, 1, 1]	[29 29 29]	vasp	[0.491]	0.02119	-0.02092	-9e-05	0.01544	0.00034	0.00422	0.0042	-0.00411	0.00015	0.00034	-0.01534	-0.021	-0.00558	-0.00558	0.00918	0	0	0	0.0340533	3	Cu3-P3-H45-C54-S9-Cl3	0.0183066	0.0357729	['Cl[Cu]']	['c1ccc(cc1)SP(Sc1ccccc1)Sc1ccccc1']	117	1.68838	Polar	equal	Converged
YEMNUA_FSR	['14']	[50]	[4]	[4]	[50]	vasp	[3.571]	0.01743	-0.00422	0.01033	0.02117	-0.01437	0.00756	0.00197	-0.01281	-0.01195	0.00483	0.00713	-0.00256	-0.01327	0.00538	-0.0106	0.00806	-0.00888	0.00956	0.0338263	1	Sn1-H20-C22-O4-F8	0.0743979	0.0819881	['[Sn]']	['[O-]C(=O)c1cc(F)c(c(c1F)F)F']	55	1.79634	Polar	equal	Converged
PASGEX01_FSR	['12']	[30]	[2]	[2, 2, 2]	[30 30 30]	vasp	[2.421]	-0.02222	0.02188	-0.00024	0.01295	0	0	0	-1e-05	1e-05	2e-05	-0.01295	0.02205	0	0	0	0	0	0	0.0337672	32	Zn3-H30-C36-N6-O18	0.0298917	0.0576249	['[OH2][Zn][OH2]']	['[O-]C(=O)c1ccnc(c1)c1nccc(c1)C(=O)[O-]']	93	1.68161	Non-polar	equal	Converged
MANZIL_FSR	['11']	[29]	[2]	[2, 2]	[29 29]	vasp	[1.294]	0.00143	-0.00532	0.00988	0.00304	0.01464	-0.00307	0.0035	-0.00052	0.0096	0.00415	0.00954	-0.0057	-0.003	-0.00687	0.00693	0.00231	0.0226	-0.00218	0.0337348	1	Cu2-H20-C18-N2-O8	0.00247803	0.0327885	['[Cu][Cu]']	['n1ccc(cc1)c1ccncc1']	50	1.52119	Polar	equal	Converged
HIZJIK_FSR	['1']	[11]	[1]	[1, 1, 1, 1]	[11 11 11 11]	vasp	[1.225]	-1e-05	-2e-05	1e-05	0.013	0	-0.01579	0.03101	0.00121	-0.01216	0	0.00516	0	-1e-05	1e-05	-3e-05	-0.00219	1e-05	-0.00187	0.033728	2	Na4-H8-C28-O12-F20	0.0279802	0.0305239	['[OH2][Na][OH2][Na]']	['Fc1c(F)c(C(=O)[O-])c(c(c1F)F)F']	72	1.9896	Polar	equal	Converged
PEQVEP_FSR	['12']	[30]	[2]	[2, 2, 2, 2]	[30 30 30 30]	vasp	[2.271]	0.00119	-0.00151	-0.00016	-0.00063	0.00851	0.00239	0.00216	0.00215	-0.00048	-0.00822	-0.00078	5e-05	-0.01726	0.01765	0	0	0	-0.02266	0.0336554	-4	C24-H24-N16-S24-Zn4	0.0906895	0.123886	['[Zn]']	['CSC1=N[N]C(=S)S1']	92	1.89113	Non-polar	equal	Converged
XELHUS_FSR	['1']	[19]	[1]	[1, 1, 1, 1, 1, 1, 1, 1]	[19 19 19 19 19 19 19 19]	vasp	[1.198]	0.00011	4e-05	-8e-05	0.00184	0	0	5e-05	4e-05	6e-05	0	0.03259	0	1e-05	0	2e-05	0	0	-0.03343	0.03343	222	K8-H36-C24-N4-O28	0.03491	0.0216105	['[K]', '[OH2][K]']	['[O-]C(=O)C[NH](CC(=O)[O-])CC(=O)[O-]']	100	1.6283	Non-polar	equal	Converged
FATHAM_FSR	['1']	[19]	[1]	[1, 1, 1, 1]	[19 19 19 19]	vasp	[1.285]	0.00085	0.00046	4e-05	-0.00643	0	0	-0.00016	-9e-05	-2e-05	0	0.00127	0	1e-05	1e-05	0	0	0	-0.0331	0.0331	222	C24-F12-H20-K4-N4-O24	0.04758	0.0540187	['[K]']	['NC(=O)C1OC1C(=O)O', '[O-]C(=O)C(F)(F)F']	88	1.85042	Non-polar	equal	Converged
QAPCUH_FSR	['13']	[31]	[3]	[3, 3]	[31 31]	vasp	[1.972]	-0.01027	0.0137	0.02032	0	0.01381	0	2e-05	-2e-05	-1e-05	-0.00685	1e-05	0.00706	-0.00328	-0.0143	-0.0137	0	0.00575	0	0.033088	m	Ga2-H22-C16-S2	0.0942076	0.0898935			42	1.61467	Polar	equal	Converged
REDMUL_FSR	['3']	[39]	[3]	[3, 3]	[39 39]	vasp	[4.604]	0.00758	0.01001	0.00357	0	-0.02564	0	-8e-05	-3e-05	-6e-05	0.01246	-4e-05	0.00077	-0.02317	-0.0014	-0.00373	0	0.00634	0	0.03308	m	C78-H48-O12-P2-Y2	0.0736687	0.0624464	['[Y]']	['[O-]C(=O)c1ccc(cc1)c1ccc(cc1)P(c1ccc(cc1)c1ccc(cc1)C(=O)[O-])c1ccc(cc1)c1ccc(cc1)C(=O)[O-]']	142	1.12734	Polar	equal	Converged
MEKHOC_FSR	['12']	[48]	[2]	[2, 2]	[48 48]	vasp	[2.342]	0	0	-1e-05	-0.02268	0	0.01512	-0.02472	0.00069	0.02062	0	-0.00724	0	0	0	0	0.01153	0	-0.00739	0.0330024	2	Cd2-H40-C36-N4-O8	0.0243023	0.0395036	['[Cd]']	['NC(C(=O)[O-])Cc1ccccc1']	90	1.78825	Polar	equal	Converged
PIGZOV_FSR	['11']	[29]	[1]	[1, 1, 1, 1]	[29 29 29 29]	vasp	[0.569]	-1e-05	3e-05	1e-05	0.03269	0	0	1e-05	-2e-05	0	0	0.01152	0	0	2e-05	-2e-05	0	0	-0.00134	0.03269	222	Cu4-H64-C32-N8-Cl4	0.01546	0.04815			112	1.6328	Non-polar	equal	Converged
RUFSUI_FSR	['14']	[50]	[4]	[4, 4, 4, 4]	[50 50 50 50]	vasp	[2.97]	3e-05	0	-1e-05	0.00351	2e-05	-0.00834	0.00735	-0.02073	0.02175	0	-0.01036	0	-1e-05	0	0	-0.02454	0	-0.01321	0.0326213	2	Sn4-H64-C44-O24	0.0116452	0.0322193	['[Sn]']	['[O-]C(=O)C1CC(CC(C1)C(=O)O)C(=O)[O-]']	136	1.84255	Polar	equal	Converged
YUZBIG_FSR	['12']	[30]	[2]	[2, 2, 2, 2, 2, 2]	[30 30 30 30 30 30]	vasp	[1.924]	0.02142	-0.02322	5e-05	0.00727	0	0	-0.00034	-0.00051	0.00019	-0.00032	-0.00727	-0.02219	-0.00016	-0.00016	2e-05	0	0	0	0.0324168	32	Zn6-H36-C30-N48	0.0863422	0.057778	['[Zn]']	['NC1=NN=C([N]1)CC1=[N]=C(N=N1)N']	120	1.49876	Non-polar	equal	Converged
RAPVAF02_FSR	['12', '1']	[48, 19]	[2, 1]	[2, 2, 1, 1]	[48 48 19 19]	vasp	[2.598, 1.222]	1e-05	0	0	0	0.01076	0	-1e-05	0	-3e-05	-0.02104	0	0	0.03141	-0.00527	-0.00583	0	0	0	0.0323782	mm2	C30-Cd2-H48-K2-N6-O12-S6	0.0298122	0.0220846	['[Cd]']	['[S]C#N']	106	1.69924	Polar	equal	Converged
ETOFEZ_FSR	['12']	[30]	[2]	[2, 2, 2, 2]	[30 30 30 30]	vasp	[2.012]	-2e-05	0.00017	-2e-05	0.03216	0	0	2e-05	0	2e-05	0	0.03229	0	-1e-05	-1e-05	0	0	0	0.02879	0.03229	222	Zn4-H24-C28-Br8-N16	0.0863	0.11846	['Br[Zn]Br']	['n1ccc(cc1)n1cnnc1']	80	2.45674	Non-polar	equal	Converged
IFIVOL_FSR	['1']	[3]	[1]	[1, 1, 1, 1]	[3 3 3 3]	vasp	[1.249]	0	0	0	-0.03226	0	0	0	0	0	0	-0.0042	0	1e-05	-1e-05	0	0	0	-0.01725	0.03226	222	Li4-H56-C48-N4-O16	0.05803	0.03854	['[Li]']	['[O-]C(=O)C1CCC[NH2]1', '[O-]C(=O)c1ccccc1']	128	1.30183	Non-polar	equal	Converged
AVEROJ_FSR	['12']	[48]	[2]	[2, 2, 2, 2, 2, 2]	[48 48 48 48 48 48]	vasp	[2.201]	1e-05	-1e-05	-1e-05	-0.03209	0	0	-9e-05	9e-05	-5e-05	0	0.03195	0	0	0	0	0	0	0	0.03209	622	Cd6-H12-C12-N18-Cl6	0.01944	0.01266	['Cl[Cd]', 'Cl[Cd]Cl', '[Cd]']	['[N]1=CN=NC=1']	54	1.65748	Non-polar	equal	Converged
MINKAX01_FSR	['1']	[19]	[1]	[1, 1, 1, 1]	[19 19 19 19]	vasp	[1.362]	3e-05	6e-05	-3e-05	0.01081	0	0	-1e-05	4e-05	1e-05	0	0.02491	0	0	1e-05	0	0	0	0.03178	0.03178	222	K4-H48-C60-N4-O20	0.02666	0.03026	['[OH2][K]']	['CC(N1C(=O)c2cccc3c2c(C1=O)ccc3)C(=O)[O-]']	136	1.55854	Non-polar	equal	Converged
PARMIG_FSR	['10']	[28]	[2]	[2, 2, 2, 2]	[28 28 28 28]	vasp	[1.675]	0.00011	-0.00012	0	-0.03177	0	0	-0.00013	0.00011	-1e-05	0	0.03177	0	1e-05	1e-05	1e-05	0	0	0	0.0317709	422	Ni4-H40-C64-N16-O16	0.01185	0.0199214	['[Ni]']	['[O-]C(=O)c1ccc2c(c1)[nH]cn2']	140	1.33345	Non-polar	equal	Converged
CYPYCU10_FSR	['11']	[29]	[1]	[1, 1, 1, 1]	[29 29 29 29]	vasp	[-0.252]	-3e-05	-0.0001	-2e-05	-0.03176	0	0	0	0	0	0	-0.02341	0	1e-05	1e-05	2e-05	0	0	0.00451	0.0317602	222	Cu4-H16-C28-N12	0.01241	0.03082	['[Cu]']	['N#Cc1ccncc1', '[C]#N']	60	1.91007	Non-polar	equal	Converged
EMOTIK_FSR	['12']	[48]	[2]	[2, 2, 2, 2]	[48 48 48 48]	vasp	[2.391]	0	0	0	-0.02027	0	0	0	-1e-05	-1e-05	0	-0.03168	0	1e-05	0	0	0	0	0.01259	0.03168	222	Cd4-H48-C44-N8-O16	0.05326	0.08494			120	1.80485	Non-polar	equal	Converged
BEHWIU_FSR	['1']	[11]	[1]	[1, 1]	[11 11]	vasp	[1.252]	-6e-05	5e-05	-2e-05	-0.02543	0	-0.00343	0.00471	-0.01902	-0.00327	0	-0.02449	0	6e-05	-1e-05	5e-05	-0.0123	1e-05	-0.00346	0.0315342	2	Na2-H42-C46-S2-N4-O12	0.0528412	0.0559058	['[Na]']	['O=C(C(C(=O)Oc1ccccc1)c1ccccc1)NC1C(=O)N2C1SC(C2C(=O)[O-])(C)C']	108	1.44883	Polar	equal	Converged
XEFKUR_FSR	['1']	[3]	[1]	[1, 1]	[3 3]	vasp	[1.136]	0.00036	4e-05	1e-05	0.01727	-6e-05	0.00197	-0.01114	0.01222	-0.02523	0	0.00915	0	5e-05	-2e-05	8e-05	0.01395	0	0.01384	0.0315241	2	Li2-B2-H28-C32-O14	0.0721903	0.0959099			78	1.39441	Polar	equal	Converged
FAYQUS_FSR	['12']	[30]	[2]	[2, 2]	[30 30]	vasp	[2.124]	0.00983	0.00728	0.0024	0	-0.00044	0	3e-05	-1e-05	-7e-05	-0.00141	1e-05	0.00271	-0.02718	-0.0044	-0.00642	0	-0.0087	0	0.0314751	m	C28-H28-N4-O8-S4-Zn2	0.00948817	0.0320163	['[Zn]']	['n1ccc(cc1)SSc1ccncc1']	74	1.60104	Polar	equal	Converged
ONOCOL01_FSR	['12']	[30]	[2]	[2, 2, 2, 2]	[30 30 30 30]	vasp	[2.219]	0.00021	-0.00024	2e-05	-0.03114	0	0	-0.00025	0.00021	1e-05	0	0.03114	0	1e-05	1e-05	2e-05	0	0	0	0.0311433	422	Zn4-H40-C48-N16-O16	0.0161	0.0150469			124	1.61155	Non-polar	equal	Converged
KAWFIX_FSR	['2']	[20]	[2]	[2, 2, 2, 2]	[20 20 20 20]	vasp	[2.435]	5e-05	-5e-05	-0.00013	-0.02194	0.0001	-0.00658	-0.00692	-0.01575	-0.00784	0	0.01095	0	8e-05	0.00017	0.00011	-0.01758	-5e-05	-0.01266	0.031094	2	C16-Ca4-H52-N4-O32	0.0282903	0.0420281	['[OH2][Ca]([OH2])([OH2])[OH2]']	['[O-]C(=O)CC(C(=O)[O-])N']	108	1.7048	Polar	equal	Converged
DEWHET_FSR	['12']	[30]	[2]	[2, 2, 2, 2]	[30 30 30 30]	vasp	[1.924]	0	0	1e-05	0.00708	0	0	0	-2e-05	2e-05	0	0.03097	0	0	1e-05	0	0	0	0.01511	0.03097	222	Zn4-H40-C16-S4-N8-O12	0.02674	0.04929	['[Zn]']	['N1CCNCC1', 'O=S(=O)=O']	84	2.10528	Non-polar	equal	Converged
INOXUE_FSR	['12']	[48]	[2]	[2, 2, 2, 2]	[48 48 48 48]	vasp	[2.31]	-0.00062	-0.00041	-0.00029	-0.03077	0	0	0.00011	7e-05	5e-05	0	-0.01588	0	0.00024	6e-05	0.00012	0	0	0.02626	0.0307803	222	Cd4-H36-C40-N20-O8	0.03046	0.0505207			108	1.95612	Non-polar	equal	Converged
HEYDUL_FSR	['12']	[48]	[2]	[2, 2]	[48 48]	vasp	[2.449]	-0.0055	0.01206	0.00322	0	-0.00601	0	0	-1e-05	0	-0.00118	0	0.00241	0.00903	-0.00532	0.00297	0	0.02694	0	0.0307042	m	Cd2-H40-C34-N8-O10	0.0177755	0.0388024	['[Cd]']	['O=C(NCc1ccncc1)NCc1ccncc1']	94	1.72543	Polar	equal	Converged
BOXZAQ_FSR	['10']	[46]	[2]	[2, 2, 2, 2]	[46 46 46 46]	vasp	[0.259]	-1e-05	0	0	0	0.0055	0	-1e-05	-1e-05	1e-05	0.01675	0	0	-0.02167	0.01197	-0.01783	0	0	0	0.0305087	mm2	H52-Pd4-C52-S4-Br8-N4	0.0244968	0.0488792	['Br[Pd]Br']	['CN1C=CC=C([C]1)CSc1ccccc1']	124	2.26884	Polar	equal	Converged
PAYMIN_FSR	['12']	[48]	[2]	[2, 2, 2, 2]	[48 48 48 48]	vasp	[2.395]	0	0	0	-0.03046	0	0	0	0	0	0	-0.01292	0	0	0	-1e-05	0	0	-0.02729	0.03046	222	Cd4-H48-C36-N16-Cl8	0.02	0.04173	['Cl[Cd]Cl']	['C(Cn1cncc1)Cn1cncc1']	112	2.05793	Non-polar	equal	Converged
OQOMAK_FSR	['12']	[30]	[2]	[2, 2, 2, 2]	[30 30 30 30]	vasp	[2.302]	1e-05	-2e-05	0	0.00829	0	0	5e-05	4e-05	7e-05	0	0.03013	0	0	-1e-05	-2e-05	0	0	0.00779	0.0301301	222	Zn4-H20-C4-N20-O4-F8	0.01758	0.0349101	['[OH2][Zn](F)F']	['Nc1nnn[nH]1']	60	2.36295	Non-polar	equal	Converged
UTATOA_FSR	['12']	[48]	[2]	[2, 2]	[48 48]	vasp	[2.583]	0	2e-05	0	-0.01202	0	0.00108	0.01291	-0.00642	0.02472	0	0.00929	0	2e-05	0	-2e-05	-0.00354	-1e-05	-0.00106	0.0300877	2	C28-Cd2-H28-N8-O8	0.0671012	0.0836429	['[Cd]']	['[O-]C(=O)CCC(=O)[O-]', 'n1ccc(cc1)NNc1ccncc1']	74	1.69695	Polar	equal	Converged
FARVAW_FSR	['11']	[29]	[2]	[2, 2]	[29 29]	vasp	[1.416]	0.00237	2e-05	-0.00066	0.00078	-0.001	0.00126	0.001	0.00105	-0.00184	0.00113	0.00029	2e-05	0.01589	0.01613	0.01968	-0.00091	0.00156	0.00073	0.0300734	1	Cu2-H40-C36-N8-O8	0.000646671	0.0300058	['[Cu]']	['c1ncn(c1)Cc1ccc(cc1)Cn1cncc1']	94	1.5326	Polar	equal	Converged
LUWYAE_FSR	['12']	[48]	[2]	[2, 2, 2, 2]	[48 48 48 48]	vasp	[2.512]	-0.00015	-0.00013	0.00042	-0.00935	0	0	0	-2e-05	-2e-05	0	0.0011	0	-2e-05	3e-05	-2e-05	0	0	0.02958	0.02958	222	Cd4-H36-C52-N4-O24-F16	0.03844	0.0497	['[OH2][Cd][OH2]']	['[O-]C(=O)c1c(C(=O)[O-])c(F)c(c(c1F)F)F']	136	2.11359	Non-polar	equal	Converged
GERKOF_FSR	['12']	[80]	[2]	[2, 2, 2]	[80 80 80]	vasp	[1.918]	0.02063	-0.02017	0.00011	-0.0014	0.00537	0.00223	0.00254	-0.00206	0.00036	0.00546	0.00135	-0.0202	0.00815	0.00815	0.0149	0	0	0	0.029561	3	Hg3-Te3-H45-C33-S6-N3	0.141988	0.113007	['[Hg]']	['CCN(C(=S)[S])CC']	93	2.51159	Polar	equal	Converged
ABIWUF_FSR	['12']	[48]	[2]	[2, 2]	[48 48]	vasp	[2.096]	0	0	-1e-05	0.02926	0	0	0	-1e-05	-2e-05	0	0.01485	0	-3e-05	0	-0.00033	0	0	-0.00629	0.02926	222	Cd2-H56-C56-I4-N4-O4	0.05795	0.08202	['I[Cd]I']	['COc1c(cc(c(c1c1c(C)c(C)cc(c1OC)c1ccncc1)C)C)c1ccncc1']	126	1.87386	Non-polar	equal	Converged
QOTZOP_FSR	['12']	[30]	[2]	[2, 2, 2, 2]	[30 30 30 30]	vasp	[2.207]	0	0	-2e-05	0.0045	0	0	-6e-05	0	-2e-05	0	-0.01829	0	0	0	0	0	0	0.02889	0.02889	222	Zn4-H40-C32-O16	0.05746	0.06196	['[Zn]']	['[O-]C(=O)C1CCCCC1C(=O)[O-]']	92	1.87523	Non-polar	equal	Converged
GABHOH_FSR	['11']	[29]	[1]	[1, 1, 1, 1]	[29 29 29 29]	vasp	[0.739]	0	-0.00019	1e-05	-0.02886	0	0	-1e-05	-1e-05	0	0	0.00618	0	-2e-05	-3e-05	-3e-05	0	0	-0.0257	0.0288606	222	Cu4-H12-C16-I8-N8	0.0046	0.0303			48	3.43403	Non-polar	equal	Converged
LICLPY02_FSR	['1']	[3]	[1]	[1, 1, 1, 1]	[3 3 3 3]	vasp	[1.013]	-7e-05	-6e-05	-8e-05	-0.02882	0	0	0	0	1e-05	0	-0.00197	0	0	0	0	0	0	-0.01851	0.0288203	222	Li4-H20-C20-N4-Cl4	0.01085	0.0335202			52	1.38105	Non-polar	equal	Converged
PEHGAM_FSR	['15']	[83]	[3]	[3, 3, 3, 3]	[83 83 83 83]	vasp	[2.509]	0	0	1e-05	0.02778	0	0	-1e-05	1e-05	0	0	0.02195	0	-1e-05	-1e-05	-2e-05	0	0	-0.02882	0.02882	222	Bi4-H32-C48-Cl4	0.03332	0.0611			88	2.58547	Non-polar	equal	Converged
MOXKUG_FSR	['1']	[3]	[1]	[1]	[3]	vasp	[1.106]	0	0	2e-05	0.02563	0.01313	1e-05	-6e-05	4e-05	-2e-05	-0.01311	0.02563	1e-05	0.00633	-0.00626	4e-05	0	0	0.01471	0.0288029	-4	B1-C16-H20-Li1-N8	0.0576406	0.0719002			46	1.21569	Non-polar	equal	Converged
SRFORA06_FSR	['2']	[38]	[2]	[2, 2, 2, 2]	[38 38 38 38]	vasp	[2.595]	4e-05	4e-05	3e-05	0.02872	0	0	4e-05	4e-05	3e-05	0	-0.02872	0	0	0	0	0	0	0	0.0287201	422	Sr4-H8-C8-O16	0.01146	0.0401801	['[Sr]']	['[O-]C=O']	36	2.43815	Non-polar	equal	Converged
DOQMAX_FSR	['2']	[20]	[2]	[2, 2]	[20 20]	vasp	[2.477]	2e-05	3e-05	1e-05	-0.0282	0	0	0	0	1e-05	0	-0.01231	0	1e-05	0	1e-05	0	0	-0.00241	0.0282	222	C48-Ca2-H60-O26	0.02659	0.01428			136	1.42068	Non-polar	equal	Converged
QEKYOX_FSR	['12']	[48]	[2]	[2, 2]	[48 48]	vasp	[2.691]	0	0	0	0.0235	0	-0.00072	-0.0244	0.00464	-0.01041	0	0.00676	0	1e-05	1e-05	-1e-05	0.00966	1e-05	0.00113	0.0277661	2	Cd2-H48-C40-S4-N16	0.0171114	0.0381687	['[Cd]']	['NCc1cccnc1']	110	1.59541	Polar	equal	Converged
YUZCED_FSR	['12']	[30]	[2]	[2, 2, 2, 2, 2, 2]	[30 30 30 30 30 30]	vasp	[1.938]	-0.01421	0.01609	-1e-05	0.01742	0	0	-0.0012	-0.0011	-8e-05	-0.00053	-0.01693	0.01483	-0.00014	-0.00014	0	0	0	0	0.0276523	32	Zn6-H36-C33-N48-O6	0.0923785	0.116618	['[Zn]']	['NC1=NN=C([N]1)CC1=[N]=C(N=N1)N']	129	1.6201	Non-polar	equal	Converged
XIZJAS_FSR	['12']	[30]	[2]	[2, 2, 2, 2]	[30 30 30 30]	vasp	[2.14]	2e-05	-0.00029	0	-0.01612	0	0	1e-05	-1e-05	1e-05	0	0.0276	0	1e-05	-1e-05	0	0	0	-0.00936	0.0276	222	Zn4-P4-H36-C32-N8-O12	0.06139	0.0742006	['[Zn]']	['[O]P(=O)[O]']	96	1.91619	Non-polar	equal	Converged
MUSGIQ_FSR	['11']	[29]	[1]	[1, 1, 1, 1, 1, 1, 1, 1]	[29 29 29 29 29 29 29 29]	vasp	[0.802]	0.00019	0.00018	0.00022	-0.01579	0	0	1e-05	-1e-05	1e-05	0	-0.00377	0	3e-05	1e-05	-1e-05	0	0	-0.02751	0.02751	222	Cu8-H32-C48-I8-N8	0.0423	0.02016			104	2.98333	Non-polar	equal	Converged
DELTAQ01_FSR	['12']	[30]	[2]	[2, 2, 2, 2]	[30 30 30 30]	vasp	[2.62]	-1e-05	0	0	-0.02703	0	0	-1e-05	0	0	0	0.02703	0	0	0	0	0	0	0	0.02703	422	Zn4-H40-C48-N8-O16	0.05802	0.08505	['[Zn]']	['[O-]C=O', 'n1ccc(cc1)c1ccncc1']	116	1.84536	Non-polar	equal	Converged
NIBRUN_FSR	['12']	[30]	[2]	[2, 2, 2, 2]	[30 30 30 30]	vasp	[2.07]	-2e-05	0.00011	-0.00015	0.02692	0	0	-6e-05	0.00012	7e-05	0	0.01536	0	-0.00037	0.0001	-0.0001	0	0	0.00508	0.0269207	222	Zn4-H20-C40-N12-O16	0.02781	0.0155051	['[Zn]']	['[O-]C(=O)C1=NC(=N[C]1C(=O)O)c1cccnc1']	92	1.72438	Non-polar	equal	Converged
PIPKUW_FSR	['12']	[30]	[2]	[2, 2, 2, 2]	[30 30 30 30]	vasp	[1.916]	-1e-05	0	0	0	-0.01275	0	1e-05	0	0	0.02664	0	0	-0.0056	0.00899	0.01342	0	0	0	0.02664	mm2	Zn4-H32-C36-S4-N8	0.0340498	0.0436085	['[Zn]']	['C1=C[N]C=N1', 'C1=N[CH]C=N1', '[S]c1ccccc1']	84	1.78656	Polar	equal	Converged
KEHWAY01_FSR	['1']	[19]	[1]	[1, 1, 1, 1]	[19 19 19 19]	vasp	[1.297]	-1e-05	0	0	-0.02662	0	0	1e-05	0	0	0	-0.00233	0	3e-05	-4e-05	-6e-05	0	0	0.00316	0.02662	222	K4-P4-H48-C36-N8-O36	0.1004	0.10356	['[K]']	['OC1C(O)C(OC1n1ccc(=O)[nH]c1=O)COP(=O)(O)[O]', 'OC1C(O)C(OC1n1ccc(=O)[nH]c1=O)COP(=O)([O])O']	136	1.77885	Non-polar	equal	Converged
ODEPIW_FSR	['12']	[48]	[2]	[2, 2]	[48 48]	vasp	[2.449]	1e-05	0	0	0	0.01476	0	0	0	0	-0.0147	0	0	0.01863	-0.01867	-3e-05	0	0	0	0.0263751	-42m	Cd2-H12-C20-N4-Cl12	0.0508834	0.0245084			50	2.12796	Non-polar	equal	Converged
QICTEC_FSR	['12']	[30]	[2]	[2, 2, 2, 2, 2, 2, 2, 2]	[30 30 30 30 30 30 30 30]	vasp	[2.223]	1e-05	0	0	0	-0.00205	0	-1e-05	1e-05	1e-05	-0.00206	0	0	-0.01838	-0.01838	-0.0044	0	0	0	0.026363	4mm	Zn8-H40-C12-S8-N4-O32	0.0536437	0.0689416	['[OH2][Zn][OH2]', '[Zn]']	['C1CN2CCN1CC2', 'O=S(=O)=O']	104	2.35074	Polar	equal	Converged
SAWVUH_FSR	['11']	[29]	[1]	[1, 1, 1, 1]	[29 29 29 29]	vasp	[0.688]	-0.0026	-0.00203	-0.00269	-0.02323	0	0	0.00042	0.00026	0.00038	0	-0.02319	0	0.00016	0.00014	0.00016	0	0	-0.02538	0.0253817	222	Cu4-H36-C40-N4-Cl4	0.03385	0.0318911			88	1.83282	Non-polar	equal	Converged
MERFUN_FSR	['14']	[82]	[2]	[2, 2, 2, 2]	[82 82 82 82]	vasp	[3.003]	-0.0004	-1e-05	0.00043	0.00989	0	0	-0.00077	0.00038	-0.00077	0	0.02255	0	6e-05	-0.0001	-0.00086	0	0	-0.02518	0.025195	222	H20-Pb4-C24-N12-O16	0.04778	0.0623607			76	2.62611	Non-polar	equal	Converged
XANBUL_FSR	['11']	[29]	[1]	[1, 1, 1, 1]	[29 29 29 29]	vasp	[0.049]	-1e-05	-1e-05	-2e-05	0	0.00159	0	2e-05	1e-05	2e-05	-0.02515	0	0	-0.01521	-0.0135	-0.00573	0	0	0	0.0251501	mm2	C24-Cu4-H20-N8	0.0358846	0.0553467	['[Cu]']	['Cc1nc2ccccc2nc1C', '[C]#N']	56	1.8644	Polar	equal	Converged
KEVLEE_FSR	['12']	[30]	[2]	[2, 2, 2, 2]	[30 30 30 30]	vasp	[1.934]	-3e-05	0	0	0	0.02495	0	1e-05	-1e-05	-1e-05	-0.02191	0	0	-0.0041	-0.00799	-0.00273	0	0	0	0.02495	mm2	C24-H24-N16-Zn4	0.0908561	0.0954548	['[Zn]']	['C1=C[N]C=N1', 'C1=N[CH]C=N1']	68	1.27732	Polar	equal	Converged
ZIFNUA_FSR	['7']	[25]	[2]	[2, 2, 2, 2]	[25 25 25 25]	vasp	[2.631]	2e-05	-9e-05	3e-05	0.02486	0	0	6e-05	-0.00012	-6e-05	0	-0.02487	0	1e-05	1e-05	-7e-05	0	0	0	0.0248704	422	C44-H36-Mn4-N8-O20	0.00797	0.0328403	['[Mn]']	['O=C1NCCN1', '[O-]C(=O)c1cc(cc(c1)C(=O)[O-])c1cc(cc(c1)C(=O)[O-])C(=O)[O-]']	112	1.34068	Non-polar	equal	Converged
ANAMOT_FSR	['7']	[25]	[2]	[2, 2, 2, 2]	[25 25 25 25]	vasp	[2.508]	2e-05	1e-05	-5e-05	0.00398	0	0	0	1e-05	0	0	0.02444	0	0	0	0	0	0	0.02057	0.02444	222	Mn4-H48-C32-S8-N8-O16	0.01509	0.03566	['[Mn]']	['[O-]C(=O)C1CSCN1']	116	1.84164	Non-polar	equal	Converged
HORXAN_FSR	['1']	[11]	[1]	[1, 1, 1, 1]	[11 11 11 11]	vasp	[1.093]	-1e-05	-1e-05	2e-05	0.00884	0	0	0	-1e-05	-1e-05	0	-0.02415	0	3e-05	2e-05	4e-05	0	0	0.00502	0.02415	222	Na4-B4-H48-C36-N24-O4	0.01051	0.01732	['O', '[Na]']		120	1.41351	Non-polar	equal	Converged
ABIXAM_FSR	['12']	[80]	[2]	[2, 2]	[80 80]	vasp	[2.134]	0	0	0	0.02415	0	0	0	-1e-05	0	0	0.01502	0	0.00012	-5e-05	-0.00029	0	0	-0.01291	0.02415	222	Hg2-H56-C56-I4-N4-O4	0.06488	0.0879	['I[Hg]I']	['COc1c(cc(c(c1c1c(C)c(C)cc(c1OC)c1ccncc1)C)C)c1ccncc1']	126	2.09086	Non-polar	equal	Converged
NALLAP_FSR	['11']	[29]	[1]	[1, 1, 1, 1]	[29 29 29 29]	vasp	[0.503]	-0.00045	-0.00045	-0.00053	-0.02134	0	0	-3e-05	-2e-05	0	0	0.02412	0	-1e-05	0	0	0	0	-0.00201	0.02412	222	Cu4-H32-C48-I4-N8	0.03604	0.03805			96	2.34067	Non-polar	equal	Converged
RORSID01_FSR	['11']	[29]	[2]	[2, 2, 2, 2, 2, 2]	[29 29 29 29 29 29]	vasp	[1.433]	0.01652	-0.01683	-0.00031	-0.00041	0	0	0.00019	-0.00012	-9e-05	0.00029	0.00045	-0.01673	0	0	4e-05	0	0	0	0.0235906	32	Cu6-H36-C42-N18-O18	0.0927472	0.0691647			120	1.69143	Non-polar	equal	Converged
FAFMOO_FSR	['10']	[28]	[2]	[2, 2, 2, 2]	[28 28 28 28]	vasp	[1.782]	0	0	0	0.00049	0	0	0	0	1e-05	0	-0.01644	0	0	-1e-05	0	0	0	0.02295	0.02295	222	Ni4-H36-C20-N12-O24	0.04424	0.05076	['[OH2][Ni][OH2]']	['O=C1NC(=O)N=C([CH]1)C(=O)[O-]']	96	1.9237	Non-polar	equal	Converged
HIQPII_FSR	['12']	[30]	[2]	[2, 2]	[30 30]	vasp	[2.127]	0	0	0	0.02283	0	0	0	0	0	0	0.02283	0	2e-05	2e-05	2e-05	0	0	-0.00953	0.02283	-42m	Zn2-H24-C20-N8	0.02283	0.03236	['[Zn]']	['C[C]1N=NC(=C1C1=C(C)N=N[C]1C)C', 'C[C]1N=NC(=C1[C]1C(=NN=C1C)C)C']	54	1.48374	Non-polar	equal	Converged
LOFDOC_FSR	['1']	[55]	[1]	[1, 1, 1, 1, 1, 1, 1, 1]	[55 55 55 55 55 55 55 55]	vasp	[1.405]	2e-05	0	2e-05	0	0.00517	0	-1e-05	-1e-05	-6e-05	-0.00586	0	0	0.02175	0.00136	-0.006	0	0	0	0.0226034	mm2	Cs8-H16-C16-N48-O16	0.00778431	0.0223527	['[Cs]']	['Nc1nnc(n1[N]N(=O)=O)c1nnc(n1[N]N(=O)=O)N']	104	2.66058	Polar	equal	Converged
EWOYUL_FSR	['1', '10']	[19, 78]	[1, 2]	[1, 1, 1, 1, 2, 2, 2, 2]	[19 19 19 19 78 78 78 78]	vasp	[1.175, 0.615]	1e-05	9e-05	9e-05	0.00954	0	0	0	0	1e-05	0	-0.02217	0	-1e-05	1e-05	2e-05	0	0	-0.00809	0.02217	222	K4-H32-Pt4-C20-N4-Cl8-O8	0.01394	0.01591	['[K]']	['O=C1O[Pt]([NH]2C1CCC2)(Cl)Cl']	80	2.86602	Non-polar	equal	Converged
DOQMEB_FSR	['2']	[38]	[2]	[2, 2]	[38 38]	vasp	[2.526]	1e-05	3e-05	0	-0.02167	0	0	-1e-05	1e-05	-2e-05	0	0.00347	0	-1e-05	-3e-05	-2e-05	0	0	-0.00792	0.02167	222	C48-H60-O26-Sr2	0.02542	0.02889			136	1.49821	Non-polar	equal	Converged
NIFNIB_FSR	['8']	[44]	[2]	[2, 2]	[44 44]	vasp	[2.246]	-5e-05	0.0001	-2e-05	-0.00577	-0.02087	-4e-05	2e-05	-1e-05	-2e-05	0.02086	-0.00579	3e-05	-0.01199	0.01201	-4e-05	0	0	-0.00732	0.0216624	-4	C32-Cl1-H32-N4-O4-Ru2	0.0181146	0.00735049			75	1.74333	Non-polar	equal	Converged
WACJUG01_FSR	['12']	[48]	[2]	[2, 2]	[48 48]	vasp	[2.812]	2e-05	-2e-05	6e-05	0.01762	0	0	-1e-05	1e-05	6e-05	0	0.01762	0	0	0	1e-05	0	0	-0.02165	0.02165	-42m	Cd2-H16-C20-S2-N4-O8	0.02861	0.0237002	['[Cd]']	['[O]S(=O)(=O)[O]', 'n1ccc(cc1)c1ccncc1']	52	2.11419	Non-polar	equal	Converged
METJIH_FSR	['14']	[82]	[2]	[2, 2, 2, 2, 2, 2, 2, 2]	[82 82 82 82 82 82 82 82]	vasp	[3.23]	1e-05	-6e-05	-1e-05	0.02088	0	0	-3e-05	0	-2e-05	0	-0.0209	0	-4e-05	-4e-05	4e-05	0	0	0	0.0209	422	H32-Pb8-C24-Br8-O16	0.03375	0.0128701			88	4.13345	Non-polar	equal	Converged
TOFQEM_FSR	['12']	[48]	[2]	[2, 2, 2, 2]	[48 48 48 48]	vasp	[2.455]	0	-1e-05	-1e-05	0	0.00809	0	-2e-05	5e-05	-1e-05	-0.00635	0	0	0.00112	-0.02082	0.00023	0	0	0	0.0208514	mm2	Cd4-H40-C48-N8-O20	0.0118993	0.0282615	['[OH2][Cd]']	['[O-]C(=O)c1ccncc1']	120	1.34917	Polar	equal	Converged
EHETER_FSR	['12']	[30]	[2]	[2, 2, 2]	[30 30 30]	vasp	[2.017]	-1e-05	1e-05	0	0.00101	0.00067	1e-05	2e-05	-2e-05	1e-05	0.00078	-0.00105	0	-0.00253	-0.00253	0.02049	0	0	0	0.0208	6	Zn3-H42-C30-N12	0.0132752	0.0117799	['[Zn]']	['CCC1=NC=C[N]1', 'CCC1=N[CH]C=N1']	87	1.60261	Polar	equal	Converged
KERWOW_FSR	['fblock']	[57]	[3]	[3, 3, 3, 3]	[57 57 57 57]	vasp	[4.206]	0	-3e-05	3e-05	0.02079	0	0	-1e-05	-2e-05	1e-05	0	-0.02077	0	0	0	2e-05	0	0	0	0.02079	422	La4-H24-C40-N20-O28	0.02518	0.04597	['[La]']	['[O-]C(=O)c1ncccn1']	116	2.31563	Non-polar	equal	Converged
NIHFUG_FSR	['13']	[81]	[3]	[3, 3, 3, 3]	[81 81 81 81]	vasp	[2.176]	0	0	0	-0.01799	0	0	-1e-05	0	0	0	-0.02071	0	-2e-05	0	1e-05	0	0	0.01659	0.02071	222	Tl4-H64-C44-S4-N4-O8	0.0381	0.05312			128	2.12109	Non-polar	equal	Converged
AKAPUX_FSR	['11']	[29]	[1]	[1, 1, 1, 1]	[29 29 29 29]	vasp	[0.425]	-1e-05	-2e-05	-0.00012	-0.0036	0	0	0	0	0	0	-0.00208	0	0	0	0	0	0	-0.02047	0.02047	222	Cu4-H32-C24-N8-Cl4	0.01157	0.0151705	['Cl[Cu]']	['CCc1cnccn1']	72	1.8678	Non-polar	equal	Converged
CUZJIR_FSR	['1', '14']	[19, 50]	[1, 2]	[1, 1, 1, 1, 2, 2, 2, 2]	[19 19 19 19 50 50 50 50]	vasp	[1.381, 2.793]	2e-05	9e-05	-6e-05	-0.02034	0	0	4e-05	0.00013	-0.00011	0	-0.02043	0	-0.00034	9e-05	9e-05	0	0	-0.02022	0.0204308	23	C48-H24-K4-O24-Sn4	0.02071	0.00061036	['[K]', '[Sn]']	['[O-]C(=O)c1ccc(cc1)C(=O)[O-]']	104	1.95968	Non-polar	equal	Converged
QIVBUT_FSR	['12', '8']	[48, 26]	[2, 3]	[2, 2, 3, 3]	[48 48 26 26]	vasp	[2.829, -1.437]	-2e-05	-3e-05	-3e-05	0.01122	0	0	2e-05	7e-05	2e-05	0	0.0197	0	1e-05	0	3e-05	0	0	0.01993	0.01993	222	Cd2-Fe2-H48-C60-S4-N8-O12	0.03703	0.0173302	['[Cd]', '[Fe]']	['[O]S(C1=CC=C[CH]1)([O])[O]', '[O]S(C1=C[CH]C=C1)([O])[O]', 'n1ccc(cc1)c1ccncc1']	136	1.39606	Non-polar	equal	Converged
IFUKIE_FSR	['1']	[19]	[1]	[1, 1, 1, 1]	[19 19 19 19]	vasp	[1.268]	0	0	0	0.01843	0	0	2e-05	-6e-05	6e-05	0	-0.00558	0	-3e-05	-2e-05	0	0	0	0.01982	0.01982	222	C24-H44-K4-N16-O20	0.00801	0.02783	['O', '[K]']	['[O-]C(=O)C1CCCNC(=NN(=O)=O)N1']	108	1.58806	Non-polar	equal	Converged
EXABEL_FSR	['1']	[3]	[1]	[1, 1]	[3 3]	vasp	[1.271]	-0.00011	-7e-05	0	0.01212	-8e-05	-0.01078	0.00744	0.01341	-0.00199	0	-0.0001	0	0	1e-05	0	0.01527	0	0.00522	0.0197633	2	Li2-H48-C46-N8-O2-F18	0.0706225	0.087468			124	1.48286	Polar	equal	Converged
LEQQUU_FSR	['12']	[48]	[2]	[2, 2, 2, 2, 2, 2]	[48 48 48 48 48 48]	vasp	[2.312]	0	0	0	-0.00021	0	0	0	1e-05	0	0	0.00219	0	7e-05	5e-05	5e-05	0	0	-0.01961	0.0196103	222	Cd6-H16-C20-Br12-N4	0.0092	0.0144103			58	3.45118	Non-polar	equal	Converged
TUFKAH_FSR	['12']	[80]	[2]	[2, 2, 2, 2]	[80 80 80 80]	vasp	[2.281]	-0.00031	-0.00027	-0.00022	0.01908	0	0	1e-05	-1e-05	-1e-05	0	-0.00672	0	0	0	-1e-05	0	0	0.00419	0.0190857	222	Hg4-H16-C24-Se4-N8-Cl8	0.02047	0.02719			64	3.21834	Non-polar	equal	Converged
ADOJOT_FSR	['12']	[80]	[2]	[2, 2]	[80 80]	vasp	[2.567]	-1e-05	-1e-05	0	0	-0.01883	0	0	1e-05	0	0.01895	0	0	0.0009	-0.00112	-8e-05	0	0	0	0.01895	-42m	Hg2-H36-C28-N4-Cl4	0.02646	0.04541			74	2.07702	Non-polar	equal	Converged
GEDKUX_FSR	['12']	[48]	[2]	[2, 2]	[48 48]	vasp	[2.442]	0	3e-05	2e-05	0	0.00432	0	-0.00023	-4e-05	-0.00019	0.00381	0	0	-0.00195	-0.01542	0.01081	0	0	0	0.0189325	mm2	C40-Cd2-H32-N12-O8	0.119667	0.11364	['[Cd]']	['[O-]C(=O)c1ccc(cc1)n1cnnc1C']	94	1.72079	Polar	equal	Converged
OCEJAK01_FSR	['12']	[48]	[2]	[2, 2]	[48 48]	vasp	[2.686]	0.0028	0.00247	0.00136	0	0.00277	0	0	0	0	-0.00434	0	-0.00484	0.01591	0.00795	0.00242	0	0.00406	0	0.0189007	m	C56-Cd2-H40-N4-O16	0.00044058	0.0190876	['[Cd]']	['[O-]C(=O)C(=O)[O-]', '[O-]C(=O)c1ccc(cc1)CN1[CH]C=C(C=C1)C1=C[CH]N(C=C1)Cc1ccc(cc1)C(=O)[O-]']	118	1.73082	Polar	equal	Converged
MIMREF01_FSR	['10']	[28]	[2]	[2, 2, 2, 2]	[28 28 28 28]	vasp	[1.79]	-1e-05	1e-05	0	-0.01633	0	0	0	0	0	0	0.00281	0	0	0	0	0	0	0.01881	0.01881	222	Ni4-H28-C28-N4-O24	0.01835	0.0254	['[OH2][Ni][OH2]']	['[O-]C(=O)c1ccc(cn1)C(=O)[O-]']	88	2.00963	Non-polar	equal	Converged
HAQQIC_FSR	['6']	[42]	[6]	[6, 6, 6, 6]	[42 42 42 42]	vasp	[5.149]	-3e-05	0	-4e-05	0.00331	0	0	3e-05	-3e-05	1e-05	0	-0.00475	0	7e-05	-2e-05	-0.00012	0	0	-0.01859	0.0185905	222	C44-H52-Mo4-N12-O12	0.00861	0.0157606	['[Mo]', '[O]']	['CCC(n1cnnc1)c1ccccc1']	124	1.64035	Non-polar	equal	Converged
ODEPUI_FSR	['12']	[48]	[2]	[2, 2]	[48 48]	vasp	[2.436]	0	0	0	0	-0.01817	0	0	-1e-05	0	0.01817	0	0	-0.01071	0.01057	-5e-05	0	0	0	0.01817	-42m	Cd2-H36-C28-N4-Cl4	0.02647	0.04464			74	1.75075	Non-polar	equal	Converged
REQBUL_FSR	['14']	[50]	[4]	[4, 4, 4, 4]	[50 50 50 50]	vasp	[2.998]	9e-05	0.00038	7e-05	-0.00237	0	0	1e-05	0	3e-05	0	0.01125	0	1e-05	0	1e-05	0	0	-0.01817	0.01817	222	Sn4-H36-C36-N4-O8-F8	0.0356	0.02435	['[Sn]']	['[O][N]C(=O)c1cc(F)ccc1F']	96	2.05941	Non-polar	equal	Converged
ODEQIX01_FSR	['12']	[48]	[2]	[2, 2]	[48 48]	vasp	[2.461]	0	0	0	0	-0.01772	0	0	0	0	0.01765	0	0	-0.01111	0.01098	-4e-05	0	0	0	0.01772	-42m	Cd2-H36-C28-Br4-N4	0.02194	0.03966			74	1.99104	Non-polar	equal	Converged
NOZKIW_FSR	['2']	[38]	[2]	[2, 2]	[38 38]	vasp	[2.604]	0.00012	-5e-05	2e-05	-0.01768	0	0	-0.00013	0.00015	-2e-05	0	-0.0176	0	2e-05	2e-05	1e-05	0	0	-0.01725	0.0176805	-42m	Sr2-P4-H24-C8-O16	0.05485	0.0725301	['[Sr]']	['OCP(=O)(CO)[O]']	54	2.1838	Non-polar	equal	Converged
HUSPUH_FSR	['6']	[42]	[6]	[6, 6, 6, 6, 6, 6, 6, 6]	[42 42 42 42 42 42 42 42]	vasp	[5.186]	-5e-05	2e-05	2e-05	0.0174	0	0	-4e-05	1e-05	2e-05	0	-0.00245	0	-3e-05	-0.00011	-0.00014	0	0	0.00612	0.0174001	222	Mo8-H40-C28-N24-O24	0.00312	0.0159101	['[Mo]', '[O]']	['C(Cn1cnnc1)Cn1cnnc1']	124	2.36761	Non-polar	equal	Converged
INOJIG_FSR	['1', '10']	[37, 28]	[1, 2]	[1, 1, 2, 2]	[37 37 28 28]	vasp	[1.268, 2.088]	4e-05	-2e-05	2e-05	-0.0173	0	0	-1e-05	0	-1e-05	0	0.0173	0	1e-05	1e-05	2e-05	0	0	0	0.0173001	622	Rb2-Ni2-H6-C6-O12	0.12293	0.14023	['[Ni]', '[Rb]']	['[O-]C=O']	28	2.47025	Non-polar	equal	Converged
NENDAL_FSR	['10']	[28]	[2]	[2, 2]	[28 28]	vasp	[1.062]	0	0	0	-0.01019	0	-0.00162	-0.00576	-0.01553	-0.00341	0	-0.0026	0	0	0	0	0.00092	0	0.01321	0.0171098	2	Ni2-H44-C44-N8-O12	0.00458642	0.0178417	['[OH2][Ni][OH2]']	['[O-]C(=O)c1ccc(cc1)Cn1cncc1']	110	1.57175	Polar	equal	Converged
EHETER01_FSR	['12']	[30]	[2]	[2, 2, 2]	[30 30 30]	vasp	[2.024]	-0.00847	0.00846	-1e-05	-0.01184	0	0	-1e-05	2e-05	6e-05	3e-05	0.01185	0.00849	1e-05	1e-05	2e-05	0	0	0	0.0168374	32	Zn3-H42-C30-N12	0.0209329	0.0309443	['[Zn]']	['CCC1=NC=C[N]1']	87	1.61029	Non-polar	equal	Converged
UBOBES01_FSR	['12']	[30]	[2]	[2, 2]	[30 30]	vasp	[2.444]	3e-05	1e-05	0	0	0.01625	0	1e-05	-1e-05	0	-0.01657	0	0	0.01064	-0.01066	-1e-05	0	0	0	0.01657	-42m	Zn2-H12-C20-N4-Cl12	0.0640214	0.0489601			50	2.07864	Non-polar	equal	Converged
XANZES_FSR	['12']	[30]	[2]	[2, 2, 2, 2]	[30 30 30 30]	vasp	[2.101]	0.00014	-4e-05	2e-05	-0.0137	0	0	0	0	1e-05	0	0.01619	0	0	0	-1e-05	0	0	-0.01651	0.01651	222	Zn4-P4-H28-C16-N8-O12	0.03189	0.02396	['[Zn]']	['[O]P(=O)[O]']	72	2.05726	Non-polar	equal	Converged
FAPYOM_FSR	['12']	[30]	[2]	[2, 2, 2, 2]	[30 30 30 30]	vasp	[2.176]	-0.0005	0.00038	-0.00101	-0.00738	0	0	-1e-05	0	1e-05	0	0.00714	0	1e-05	1e-05	4e-05	0	0	-0.01624	0.0162401	222	Zn4-H36-C48-N4-O12	0.03972	0.0335811	['[OH]', '[Zn]']	['[O-]C(=O)c1ccc(cc1)c1cccnc1']	104	1.8386	Non-polar	equal	Converged
GIWBOF_FSR	['12']	[30]	[2]	[2]	[30]	vasp	[2.272]	-0.00154	0.0007	0.00182	0.00202	0.00021	-0.00737	0.0086	-0.00713	0.00064	0	-0.01165	0	-0.00017	5e-05	0.00011	-0.01147	1e-05	-0.0066	0.0162197	2	C24-F6-H16-N2-O4-Zn1	0.0328913	0.0397182	['[Zn]']	['n1ccncc1']	53	1.51174	Polar	equal	Converged
GUPDUR_FSR	['12']	[48]	[2]	[2, 2]	[48 48]	vasp	[2.184]	-0.00012	4e-05	2e-05	-0.01571	0	0	5e-05	-0.00018	-2e-05	0	-0.01572	0	0	0	0	0	0	-0.00202	0.0157211	-42m	C36-Cd2-H28-N8	0.03627	0.03829	['[Cd]']	['c1ccc(cc1)C1=NC=C[N]1']	74	1.60795	Non-polar	equal	Converged
BEGBOG_FSR	['1', '14']	[11, 82]	[1, 2]	[1, 1, 1, 1, 2, 2, 2, 2]	[11 11 11 11 82 82 82 82]	vasp	[1.195, 2.899]	-0.00017	0	0.00028	-0.01481	0	0	0.00027	-0.00013	3e-05	0	-0.01482	0	6e-05	0.00025	-0.00016	0	0	-0.01481	0.0148232	23	Na4-H60-Pb4-C32-O24	0.03675	0.0219435	['[Na]', '[Pb]']	['[O-]C(=O)C']	124	2.16239	Non-polar	equal	Converged
JUKVEQ01_FSR	['12']	[30]	[2]	[2, 2, 2, 2]	[30 30 30 30]	vasp	[2.166]	-8e-05	-5e-05	-9e-05	-0.01473	0	0	-2e-05	-2e-05	-5e-05	0	-0.00842	0	-4e-05	-1e-05	-2e-05	0	0	-0.00677	0.0147306	222	Zn4-H32-C48-N8-O16	0.03424	0.04101	['[Zn]']	['[O-]C(=O)c1ccncc1']	108	1.6631	Non-polar	equal	Converged
FUFPOL_FSR	['2']	[20]	[2]	[2]	[20]	vasp	[3.139]	1e-05	-2e-05	0	0.00711	0	0	-6e-05	9e-05	0	0	0.0071	0	-1e-05	-1e-05	-1e-05	0	0	-0.01471	0.01471	-42m	C10-Ca1-H10-N8	0.02494	0.03965			29	1.29274	Non-polar	equal	Converged
PODJAV_FSR	['12']	[48]	[2]	[2, 2, 2]	[48 48 48]	vasp	[2.252]	-0.00727	0.00727	3e-05	0.00956	0	0	-0.00281	0.00225	-0.0001	-0.00048	-0.00874	0.00702	0	0	-7e-05	0	0	0	0.0145393	32	Cd3-H24-C30-S12-N30	0.0694364	0.0809883	['[Cd]']	['S=C1[N]N=C(S1)CN1[CH]N=C[N]1']	99	2.02793	Non-polar	equal	Converged
NAPTEE_FSR	['12']	[48]	[2]	[2, 2]	[48 48]	vasp	[2.012]	-0.00254	-0.00445	-0.00166	0	0.00197	0	-0.00011	-0.00017	-6e-05	-0.00068	5e-05	-0.00109	-0.00734	-0.00931	-0.00546	0	0.00161	0	0.01427	m	C16-Cd2-H20-I4-N8	0.00082365	0.0140739			50	2.71163	Polar	equal	Converged
OLUNEO_FSR	['9']	[45]	[2]	[2, 2]	[45 45]	vasp	[-0.435]	0	-1e-05	-1e-05	-0.00636	0	0	0.00037	0.0004	0.00012	0	0.01424	0	0	0	0	0	0	-0.00312	0.0142509	222	C68-H64-N10-Rh2	0.01029	0.01244	['[Rh][Rh]']	['[C]#[N]c1ccc(cc1)[N]#[C]']	144	1.26051	Non-polar	equal	Converged
SIYSAV_FSR	['12']	[30]	[2]	[2, 2, 2, 2]	[30 30 30 30]	vasp	[1.875]	5e-05	8e-05	9e-05	-0.01419	0	0	0	0	0	0	0.00121	0	0	0	1e-05	0	0	-0.0035	0.0141906	222	Zn4-H32-C28-N4-Cl4-O4	0.05382	0.04699	['Cl[Zn]']	['[O]Cc1cccc(n1)C']	76	1.75677	Non-polar	equal	Converged
EJAXAO_FSR	['12']	[48]	[2]	[2, 2]	[48 48]	vasp	[2.916]	-3e-05	4e-05	2e-05	-0.01319	0	0	4e-05	-3e-05	2e-05	0	-0.01319	0	-1e-05	-1e-05	1e-05	0	0	0.01379	0.01379	-42m	Cd2-H16-C24-S2-N4-O8	0.02685	0.0189401	['[Cd]']	['[O]S(=O)(=O)[O]', 'n1ccc(cc1)C#Cc1ccncc1']	56	1.86085	Non-polar	equal	Converged
WOTNUQ_FSR	['12']	[30]	[2]	[2, 2, 2]	[30 30 30]	vasp	[2.281]	0.00793	-0.00778	7e-05	0.0077	0	0	-5e-05	1e-05	-3e-05	-2e-05	-0.00767	-0.00788	4e-05	4e-05	2e-05	0	0	0	0.0135172	32	Zn3-H12-C6-O18	0.0169868	0.0282707	['[OH2][Zn][OH2]']	['[O-]C(=O)C(=O)[O-]']	39	2.2177	Non-polar	equal	Converged
JOMWAJ01_FSR	['12']	[30]	[2]	[2, 2, 2, 2]	[30 30 30 30]	vasp	[2.211]	-1e-05	3e-05	2e-05	0.01346	0	0	-5e-05	0	-3e-05	0	-0.01345	0	0	0	-1e-05	0	0	0	0.0134601	422	Zn4-H32-C48-N8-O16	0.01646	0.02992	['[Zn]']	['[O-]C(=O)c1cccnc1']	108	1.66377	Non-polar	equal	Converged
CUZJOX_FSR	['1', '14']	[37, 50]	[1, 2]	[1, 1, 1, 1, 2, 2, 2, 2]	[37 37 37 37 50 50 50 50]	vasp	[1.401, 2.822]	0.0003	-0.00015	-0.0001	0.01322	0	0	-8e-05	0.00045	-0.00026	0	0.01333	0	0.00021	-0.0003	0.00022	0	0	0.01313	0.0133407	23	C48-H24-O24-Rb4-Sn4	0.02265	0.0359839	['[Rb]', '[Sn]']	['[O-]C(=O)c1ccc(cc1)C(=O)[O-]']	104	2.1625	Non-polar	equal	Converged
DEHHEG_FSR	['12']	[30]	[2]	[2, 2, 2, 2]	[30 30 30 30]	vasp	[2.709]	0	0	0	-0.0129	0	0	-1e-05	1e-05	0	0	0.0129	0	0	0	0	0	0	0	0.0129	422	Zn4-H32-C40-N16-O16	0.07885	0.06595	['[Zn]']	['[O][N][O]', 'n1ccc(cc1)c1ccncc1']	108	1.86597	Non-polar	equal	Converged
TALQUV_FSR	['12']	[30]	[2]	[2, 2, 2, 2]	[30 30 30 30]	vasp	[2.053]	-0.00026	8e-05	-0.00022	-0.00787	0	0	0	0	0	0	-0.01262	0	0	0	0	0	0	0.0079	0.01262	222	Zn4-H28-C32-Br8-N20	0.08384	0.0917107	['Br[Zn]Br']	['n1ccc(cc1)C=Nn1cnnc1']	92	2.26653	Non-polar	equal	Converged
DIQXOQ_FSR	['12']	[30]	[2]	[2, 2, 2, 2]	[30 30 30 30]	vasp	[2.503]	2e-05	2e-05	0	-0.0052	0	0	0	-1e-05	-1e-05	0	-0.01213	0	0	-1e-05	0	0	0	-0.00643	0.01213	222	Zn4-H36-C36-N4-O20	0.01673	0.0103	['[Zn]']	['[O-]C(=O)C(O)C', '[O-]C(=O)c1ccncc1']	100	1.84368	Non-polar	equal	Converged
JABYUH01_FSR	['11']	[29]	[2]	[2, 2, 2, 2]	[29 29 29 29]	vasp	[1.507]	-1e-05	0	0	0.00204	0	0	1e-05	1e-05	1e-05	0	-0.01199	0	1e-05	1e-05	1e-05	0	0	0.00734	0.01199	222	Cu4-H48-C28-N8-O12	0.05373	0.06572			100	1.70385	Non-polar	equal	Converged
BOSJUQ_FSR	['1']	[19]	[1]	[1, 1, 1, 1]	[19 19 19 19]	vasp	[1.365]	-6e-05	-0.00015	-0.0001	0.00869	0	0	-4e-05	-1e-05	-4e-05	0	-0.01188	0	0	2e-05	-2e-05	0	0	0.00878	0.0118801	222	K4-H44-C32-S4-N8-O8	0.01651	0.0149712	['[K]']	['CCN1C(=O)[CH]C(=O)N(C1=S)CC']	100	1.55117	Non-polar	equal	Converged
QEYWIB_FSR	['12']	[30]	[2]	[2, 2]	[30 30]	vasp	[2.459]	1e-05	0	0	-0.00175	0	0.01063	0.00436	0.00134	0.00323	0	-0.00063	0	0	0	-1e-05	-0.00073	0	0.00474	0.0117923	2	Zn2-H28-C24-N24-O12	0.000107735	0.0118505	['[OH2][Zn][OH2]']	['[O-]C(=O)C(n1cncn1)N1[CH]N=C[N]1', '[O-]C(=O)C(n1ncnc1)n1ncnc1']	90	1.72465	Polar	equal	Converged
YEDVUZ_FSR	['12']	[48]	[2]	[2, 2, 2, 2]	[48 48 48 48]	vasp	[2.258]	1e-05	-1e-05	-2e-05	0.00859	0	0	3e-05	3e-05	-4e-05	0	-0.00462	0	-1e-05	1e-05	3e-05	0	0	-0.01178	0.01178	222	Cd4-H28-C20-N4-Cl8-O8	0.00305	0.01169			72	2.2078	Non-polar	equal	Converged
MOXFUB_FSR	['12']	[30]	[2]	[2, 2, 2, 2]	[30 30 30 30]	vasp	[1.917]	-1e-05	1e-05	-1e-05	0.00324	0	0	-1e-05	1e-05	1e-05	0	0.01158	0	0	0	1e-05	0	0	-0.00839	0.01158	222	Zn4-H64-C44-I8-N16	0.0145	0.01251	['I[Zn]I']	['Cc1[nH][n-]c(c1Cc1c(C)[n-][nH]c1C)C']	136	2.07159	Non-polar	equal	Converged
XEJSUC_FSR	['13', '1']	[13, 3]	[3, 1]	[3, 1]	[13 3]	vasp	[3.429, 1.507]	0.00058	-0.00033	0.00012	0.01121	-0.0021	-0.00011	0.0006	-0.0005	-2e-05	0.00193	0.0113	-0.00022	0.00249	-0.00271	0.0001	0	0	0.00113	0.011535	-4	Al1-C28-H16-Li1-N4-O4	0.131126	0.127537			54	1.381	Non-polar	equal	Converged
ORONOA_FSR	['1']	[19]	[1]	[1, 1, 1, 1, 1, 1, 1, 1, 1, 1, 1, 1]	[19 19 19 19 19 19 19 19 19 19 19 19]	vasp	[1.226]	-3e-05	-1e-05	1e-05	0	0.00142	0	-1e-05	-1e-05	0	0.00083	0	0	0.00915	0.00499	-0.00418	0	0	0	0.0112293	mm2	K12-H20-C24-O28	0.000783199	0.0106747	['[K]']	['[O-]C(=O)C(CC(=O)[O-])(CC(=O)[O-])O']	84	2.05478	Polar	equal	Converged
GUPCOK01_FSR	['12']	[48]	[2]	[2, 2, 2]	[48 48 48]	vasp	[2.154]	-0.00211	0.0021	2e-05	-0.01032	0	0	1e-05	-1e-05	0	-8e-05	0.01022	0.00219	-1e-05	-1e-05	-2e-05	0	0	0	0.0107454	32	Cd3-H42-C30-N12	0.0373998	0.0378126	['[Cd]']	['CCC1=NC=C[N]1']	87	1.67772	Non-polar	equal	Converged
MUJGII02_FSR	['12', '11']	[30, 29]	[2, 1]	[2, 2, 1, 1, 1, 1]	[30 30 29 29 29 29]	vasp	[2.121, 0.697]	-8e-05	-9e-05	-4e-05	0.01058	0	0	0	1e-05	-1e-05	0	0.01061	0	-1e-05	-1e-05	-2e-05	0	0	0.00105	0.01061	-42m	Zn2-Cu4-H24-C24-N16	0.04506	0.04611	['[Cu][Cu]', '[Zn]']	['C1=C[N]C=N1', 'C1=N[CH]C=N1']	70	2.09161	Non-polar	equal	Converged
MUJGII02_FSR	['12', '11']	[30, 29]	[2, 1]	[2, 2, 1, 1, 1, 1]	[30 30 29 29 29 29]	vasp	[2.121, 0.697]	-8e-05	-9e-05	-4e-05	0.01058	0	0	0	1e-05	-1e-05	0	0.01061	0	-1e-05	-1e-05	-2e-05	0	0	0.00105	0.01061	-42m	Zn2-Cu4-H24-C24-N16	0.04506	0.04611	['[Cu][Cu]', '[Zn]']	['C1=C[N]C=N1', 'C1=N[CH]C=N1']	70	2.09161	Non-polar	equal	Converged
MUJGII02_FSR	['12', '11']	[30, 29]	[2, 1]	[2, 2, 1, 1, 1, 1]	[30 30 29 29 29 29]	vasp	[2.121, 0.697]	-8e-05	-9e-05	-4e-05	0.01052	0	0	0	1e-05	-1e-05	0	0.01055	0	-2e-05	-2e-05	-3e-05	0	0	0.00093	0.01055	-42m	Zn2-Cu4-H24-C24-N16	0.04506	0.04611	['[Cu][Cu]', '[Zn]']	['C1=C[N]C=N1', 'C1=N[CH]C=N1']	70	2.09161	Non-polar	equal	Converged
MUJGII02_FSR	['12', '11']	[30, 29]	[2, 1]	[2, 2, 1, 1, 1, 1]	[30 30 29 29 29 29]	vasp	[2.121, 0.697]	-8e-05	-9e-05	-4e-05	0.01052	0	0	0	1e-05	-1e-05	0	0.01055	0	-2e-05	-2e-05	-3e-05	0	0	0.00093	0.01055	-42m	Zn2-Cu4-H24-C24-N16	0.04506	0.04611	['[Cu][Cu]', '[Zn]']	['C1=C[N]C=N1', 'C1=N[CH]C=N1']	70	2.09161	Non-polar	equal	Converged
MALSIE_FSR	['8']	[26]	[2]	[2, 2, 2, 2, 2, 2]	[26 26 26 26 26 26]	vasp	[1.705]	0.00126	-0.00112	8e-05	-0.01009	0	0	-0.00037	0.00042	-2e-05	-0.00067	0.01009	-0.00125	-0.00012	-0.00012	5e-05	0	0	0	0.0104987	32	Fe6-H18-C42-O18	0.0412444	0.0418449			84	0.680101	Non-polar	equal	Converged
TAXHUX_FSR	['12']	[30]	[2]	[2, 2, 2, 2, 2, 2]	[30 30 30 30 30 30]	vasp	[1.911]	0.00012	5e-05	5e-05	0.00084	3e-05	0.00034	0.00333	0.00757	0.00627	0	0.00067	0	7e-05	-3e-05	-2e-05	0.00121	1e-05	-1e-05	0.0104003	2	C20-H56-N8-O16-P4-Zn6	0.00014375	0.0103932	['[Zn]']	['NCCCCCN', '[O]P(=O)([O])[O]']	110	1.6923	Polar	equal	Converged
DORFIA_FSR	['10']	[28]	[2]	[2, 2, 2, 2]	[28 28 28 28]	vasp	[1.862]	0	0	0	0.00391	0	0	0	0	0	0	-0.00995	0	0	0	0	0	0	0.00801	0.00995	222	Ni4-H72-C40-O24	0.0113	0.01289	['O', '[Ni]']	['[O-]C(=O)C1CCC(C1(C)C)(C)C(=O)[O-]']	140	1.59713	Non-polar	equal	Converged
LICDOX01_FSR	['1']	[3]	[1]	[1, 1, 1, 1]	[3 3 3 3]	vasp	[1.04]	-2e-05	2e-05	1e-05	0.00816	0	0	0	0	0	0	-0.00977	0	0	0	0	0	0	0.00986	0.00986	222	Li4-H32-C16-Cl4-O8	0.0071	0.00723006	['[Li]']	['O1CCOCC1']	64	1.40937	Non-polar	equal	Converged
QOXFUE_FSR	['12']	[30]	[2]	[2, 2, 2, 2]	[30 30 30 30]	vasp	[2.16]	-0.00013	6e-05	-9e-05	-0.00813	0	0	1e-05	1e-05	0	0	0.00793	0	-1e-05	0	-1e-05	0	0	-0.00153	0.00813176	222	Zn4-P8-H40-C32-O16	0.06399	0.0634302	['[Zn]']	['CP(=O)(c1ccccc1)CP(=O)([O])[O]']	100	1.95634	Non-polar	equal	Converged
VEPCIF_FSR	['12']	[30]	[2]	[2, 2, 2, 2]	[30 30 30 30]	vasp	[2.107]	0	-6e-05	-9e-05	-0.00431	0	0	-1e-05	-1e-05	-1e-05	0	0.00789	0	0	0	1e-05	0	0	-0.00065	0.00789002	222	Zn4-H28-C24-S4-N28-O8	0.03167	0.03102	['[Zn]']	['CCSC1=NN=N[N]1', 'O=N(=O)C1=N[CH]C=N1']	96	1.80049	Non-polar	equal	Converged
ODOFOC_FSR	['11']	[29]	[1]	[1, 1, 1, 1]	[29 29 29 29]	vasp	[0.684]	0.00032	0.00028	0.0003	0.00591	0	0	-1e-05	-3e-05	-2e-05	0	-0.0004	0	1e-05	2e-05	2e-05	0	0	-0.00761	0.00761006	222	Cu4-H12-C16-I4-N8-Cl4	0.02683	0.02723			48	2.75982	Non-polar	equal	Converged
XUNSAC_FSR	['1']	[3]	[1]	[1, 1, 1, 1, 1, 1, 1, 1]	[3 3 3 3 3 3 3 3]	vasp	[1.184]	2e-05	6e-05	0	0.00088	-1e-05	-0.00056	0	0.0067	-0.00118	0	-0.00133	0	1e-05	1e-05	1e-05	0.00044	-1e-05	0.00026	0.00693218	2	Li8-H32-C48-N8-O16	6.16e-05	0.00696985	['[Li]']	['[O-]C(=O)c1ccncc1']	112	1.0933	Polar	equal	Converged
FIZSUE_FSR	['11']	[29]	[1]	[1, 1, 1, 1, 1, 1, 1, 1, 1, 1, 1, 1, 1, 1, 1, 1]	[29 29 29 29 29 29 29 29 29 29 29 29 29 29 29 29]	vasp	[0.675]	0	1e-05	-1e-05	-0.00349	0	0	2e-05	-1e-05	0	0	0.00611	0	0	-1e-05	0	0	0	-0.00458	0.00611004	222	Cu16-H64-C32-S8-I16	0.01262	0.00913001	['I[Cu]12(I)[Cu]3[Cu]1([Cu]23I)I']	['C1CCCS1']	136	3.46504	Non-polar	equal	Converged
NOGMIG_FSR	['1']	[3]	[1]	[1, 1, 1, 1, 1, 1, 1, 1, 1, 1, 1, 1, 1, 1, 1, 1]	[3 3 3 3 3 3 3 3 3 3 3 3 3 3 3 3]	vasp	[1.082]	0.00322	0.00307	0.00331	-0.00247	0	0	0	-2e-05	-8e-05	-5e-05	-0.00199	0.00015	1e-05	0	-1e-05	-4e-05	-0.00012	-0.00104	0.00607057	222	C16-H16-Li16-N64	0.0027	0.0075815			112	1.48082	Non-polar	equal	Converged
PIRNAH01_FSR	['1']	[55]	[1]	[1, 1, 1, 1]	[55 55 55 55]	vasp	[1.575]	-0.00067	-0.00024	0.00074	0.00391	0	0	-6e-05	-0.00025	1e-05	0	0.00543	0	2e-05	3e-05	2e-05	0	0	0.00286	0.00543617	222	Cs4-H16-C32-N8-Cl8-O16	0.00657	0.00771431	['O', '[Cs]']	['N#CC1=C(C#N)C(=O)C(=C(C1=O)Cl)Cl']	84	2.24516	Non-polar	equal	Converged
CAWXAZ_FSR	['11']	[29]	[1]	[1, 1, 1, 1, 1, 1, 1, 1]	[29 29 29 29 29 29 29 29]	vasp	[-0.015]	3e-05	0	2e-05	0.005	0	0	1e-05	1e-05	0	0	-0.00352	0	-2e-05	-1e-05	-1e-05	0	0	-0.00036	0.00500013	222	Cu8-H48-C48-N24	0.00297	0.00222029	['[Cu]']	['Cc1cnccn1', '[C]#N']	128	1.87179	Non-polar	equal	Converged
RORSID05_FSR	['11']	[29]	[2]	[2, 2, 2, 2, 2, 2]	[29 29 29 29 29 29]	vasp	[1.439]	-0.00211	0.00206	-0.00015	0.00385	0	0	0.00015	-0.00022	0.0004	-0.00017	-0.004	0.00223	-1e-05	-1e-05	-2e-05	0	0	0	0.00492613	32	Cu6-H36-C42-N18-O18	0.0746051	0.071642			120	1.66653	Non-polar	equal	Converged
HENYUV_FSR	['12']	[30]	[2]	[2, 2, 2, 2]	[30 30 30 30]	vasp	[2.227]	-4e-05	0	8e-05	-0.00492	0	0	0	-4e-05	8e-05	0	0.00492	0	0	0	0	0	0	0	0.00492146	422	Zn4-H8-C28-N4-O16	2e-05	0.00490147	['[Zn]']	['[O-]C(=O)c1cc(cc(n1)C(=O)[O-])c1cc(nc(c1)C(=O)[O-])C(=O)[O-]']	60	1.5018	Non-polar	equal	Converged
OXUSOQ_FSR	['12', '6']	[30, 42]	[2, 6]	[2, 2, 2, 2, 6, 6, 6, 6]	[30 30 30 30 42 42 42 42]	vasp	[2.682, 3.79]	0.00081	0.00077	0.00062	0	-0.00102	0	-1e-05	-1e-05	-1e-05	0.00114	0	0.00019	-0.0005	-0.00434	-0.00061	0	0.00022	0	0.00453472	mm2	Zn4-Mo4-H36-C48-N20-O16	0.00179229	0.00409944	['[Mo]', '[O]', '[Zn]']		128	2.17208	Polar	equal	Converged
XOLZUT_FSR	['12']	[30]	[2]	[2, 2]	[30 30]	vasp	[2.694]	0.00183	0.00131	0.00212	-0.00032	-0.00058	-0.00084	0.00119	0.00118	0.00078	-0.00037	-0.00042	-0.00065	0.00118	0.00108	0.00193	6e-05	-7e-05	0.00013	0.00446675	1	Zn2-H30-C38-N2-O8	0.000490249	0.00440837	['[Zn][Zn]']	['[O-]C(=O)c1ccc2c(c1)ccc(c2)C(=O)[O-]']	80	1.56721	Polar	equal	Converged
KEYSEO_FSR	['12']	[30]	[2]	[2, 2, 2, 2]	[30 30 30 30]	vasp	[2.002]	1e-05	2e-05	2e-05	0.00403	0	0	-3e-05	-1e-05	-2e-05	0	-0.00404	0	1e-05	1e-05	1e-05	0	0	0	0.00404018	422	Zn4-H48-C32-N24	0.00172	0.00576012	['[Zn]']	['CCC1=NN=C[N]1', 'CCC1=[N]=CN=N1']	108	1.48121	Non-polar	equal	Converged
DEZMOL_FSR	['12']	[48]	[2]	[2, 2]	[48 48]	vasp	[2.778]	-3e-05	2e-05	1e-05	-0.00046	7e-05	-0.00072	-0.00226	9e-05	0.00175	0	-0.0021	0	-0.00021	-6e-05	-0.0002	0.0019	-0.00012	0.00137	0.00355106	2	C12-Cd2-H12-N6-O2-S4	0.000616279	0.00345869	['[Cd]']	['Cc1[n+]([O-])c(C)c([n+](c1C)[O-])C', '[S]C#N']	38	2.17774	Polar	equal	Converged
APORUS_FSR	['12']	[48]	[2]	[2, 2, 2, 2]	[48 48 48 48]	vasp	[1.996]	0.00254	-0.00021	0.00187	0	0.00158	0	1e-05	0	0	0.00047	0	-2e-05	0.00019	-0.00077	-0.00107	0	0.00054	0	0.00353741	m	Cd4-H56-C28-S8-N16-O16	2.49721e-05	0.00352968	['[Cd]']	['[O-]C(=O)CCCC(=O)[O-]']	128	1.91388	Polar	equal	Converged
INOZIU_FSR	['12']	[80]	[2]	[2, 2]	[80 80]	vasp	[1.961]	-3e-05	4e-05	-0.0001	0.0003	7e-05	0.00148	-0.00159	-0.00224	0	0	-0.00031	0	5e-05	0.00018	-7e-05	-0.00039	-3e-05	-0.00313	0.00350448	2	Hg2-H28-C26-I4-N4	0.000216795	0.00351819	['I[Hg]I']	['C(Cc1ccncc1)Cc1ccncc1']	64	2.72378	Polar	equal	Converged
